# Supplementary material for: Annelid functional genomics reveal the origins of bilaterian life cycles
Source: Research Square preprint supplement (doi:10.21203/rs.3.rs-1347136/v1), 2022-02-15
Supplement: Supplementary file 2 [file f55fcd2061c80dba33a57f61.xlsx]

## Sheet: gastrula_vs_blastula_up
Gene ID	baseMean	log2(fold-change) (LFC)	log2(fold-change) standard error (LFC-SE)	statistic	p-value	adjusted p-value	PANTHER annotation	BLASTx hit	BLASTp hit	PFAM domains	SignalP	eggnog	KEGG	PANTHER ID	Gene Ontology BLASTx	Gene Ontology BLASTp	Gene Ontology PFAM domain	Transcript	Peptide	blastula rep1	blastula rep2	gastrula rep1	gastrula rep2	elongation rep1	elongation rep2	early larva rep1	early larva rep2	mitraria larva rep1	mitraria larva rep2	competent larva rep1	competent larva rep2	juvenile rep1
OFUSG26274.1	2342.23	11.4089	0.826031	12.6229	1.57846e-36	2.44679e-34	HOMEOBOX PROTEIN ARISTALESS	DRGX_HUMAN^DRGX_HUMAN^Q:942-1178,H:17-93^63.291%ID^E:3.79e-24^RecName: Full=Dorsal root ganglia homeobox protein;^Eukaryota; Metazoa; Chordata; Craniata; Vertebrata; Euteleostomi; Mammalia; Eutheria; Euarchontoglires; Primates; Haplorrhini; Catarrhini; Hominidae; Homo	DRGX_HUMAN^DRGX_HUMAN^Q:942-1178,H:17-93^63.291%ID^E:3.79e-24^RecName: Full=Dorsal root ganglia homeobox protein;^Eukaryota; Metazoa; Chordata; Craniata; Vertebrata; Euteleostomi; Mammalia; Eutheria; Euarchontoglires; Primates; Haplorrhini; Catarrhini; Hominidae; Homo	PF00046.30^Homeodomain^Homeodomain^248-304^E:1.3e-23	.	.	KEGG:hsa:644168	PTHR24329	GO:0000790^cellular_component^nuclear chromatin`GO:0005634^cellular_component^nucleus`GO:0000981^molecular_function^DNA-binding transcription factor activity, RNA polymerase II-specific`GO:0000977^molecular_function^RNA polymerase II transcription regulatory region sequence-specific DNA binding`GO:0007411^biological_process^axon guidance`GO:0009593^biological_process^detection of chemical stimulu…	GO:0000790^cellular_component^nuclear chromatin`GO:0005634^cellular_component^nucleus`GO:0000981^molecular_function^DNA-binding transcription factor activity, RNA polymerase II-specific`GO:0000977^molecular_function^RNA polymerase II transcription regulatory region sequence-specific DNA binding`GO:0007411^biological_process^axon guidance`GO:0009593^biological_process^detection of chemical stimulu…	GO:0003677^molecular_function^DNA binding	CATATGGTCAAAATATTATCGGATTAGTTATCGTAAAATTTTGATGGATTTAACGTTCACAATAAATGTATTTAAACTTACTTACAGGTAAATCTTAATTATTCATAGGCAAACTGACCAATCAATGAACAGCTTTGACACGCAATTGAGTCACGGTTCCACAAATGAATTTCTATTAAAATAGTACTGCAGTAATGAGTTCTGCATAGATGGTAAATGAACTCAATTAACATTTTATTTAATTATTCATTTTGAAAATGGCTTTAGAACATAATGAAAACCTGGACATTCAAATGGCACAAACGGAATCGTTATTTACAGCCGATCATTCTGAACAAGAAAATCTAGGATTGAACAATACTCCGCCTCAAAAAGATATTCGAGACGATATTGAAGCAT…	MALEHNENLDIQMAQTESLFTADHSEQENLGLNNTPPQKDIRDDIEASGYIEEEQLIHGQTIGTEDNLNITKEHFQVVCSNSDVSTNEVTVGNAGASELAGPTQSQMPQSDPPALNQHDTLGLAASSPCGEQQDPPQLEPNDAHQSQYIDTTSQQTQSAPQYIPCADTDDALTGTTGHLGHQLQQTSAPSEGDQISTSLQQAQPEFELDSSQDLSDADLSEDATGDSDGVLSGLNFDDDKYITSKKQRRNRTTFTVEQLRELEGVFQHTHYPDCTLREQIADKVKLTEARVQVWFQNRRAKWRKQEKSMARMYEMWRHKMQQVPGYPPLMPPYSNAGMPGMSRPPSSMFVPRLPLSVPPMYPPGQYPPGPSGPTRYSMPNGGQLQSQLPGDVPKVRLEP…	4.17327	0	12340.9	5098.24	10953.7	7816.12	7884.55	6913.07	3620.54	4520.78	1764.68	1991.97	291.188
OFUSG01771.1	246.878	11.3653	1.05741	8.33856	7.52015e-17	2.32884e-15	OLIGODENDROCYTE TRANSCRIPTION FACTOR 2	OLIG3_HUMAN^OLIG3_HUMAN^Q:544-825,H:56-152^67.01%ID^E:1.73e-33^RecName: Full=Oligodendrocyte transcription factor 3;^Eukaryota; Metazoa; Chordata; Craniata; Vertebrata; Euteleostomi; Mammalia; Eutheria; Euarchontoglires; Primates; Haplorrhini; Catarrhini; Hominidae; Homo	OLIG3_HUMAN^OLIG3_HUMAN^Q:544-825,H:56-152^67.01%ID^E:1.73e-33^RecName: Full=Oligodendrocyte transcription factor 3;^Eukaryota; Metazoa; Chordata; Craniata; Vertebrata; Euteleostomi; Mammalia; Eutheria; Euarchontoglires; Primates; Haplorrhini; Catarrhini; Hominidae; Homo	PF00010.27^HLH^Helix-loop-helix DNA-binding domain^67-119^E:1.5e-12	.	.	KEGG:hsa:167826`KO:K09085	PTHR19290:SF32	GO:0000790^cellular_component^nuclear chromatin`GO:0003677^molecular_function^DNA binding`GO:0000981^molecular_function^DNA-binding transcription factor activity, RNA polymerase II-specific`GO:0046983^molecular_function^protein dimerization activity`GO:0003714^molecular_function^transcription corepressor activity`GO:0000122^biological_process^negative regulation of transcription by RNA polymerase…	GO:0000790^cellular_component^nuclear chromatin`GO:0003677^molecular_function^DNA binding`GO:0000981^molecular_function^DNA-binding transcription factor activity, RNA polymerase II-specific`GO:0046983^molecular_function^protein dimerization activity`GO:0003714^molecular_function^transcription corepressor activity`GO:0000122^biological_process^negative regulation of transcription by RNA polymerase…	GO:0046983^molecular_function^protein dimerization activity	CTCTCCGTAGCGAACAACAGCGCGAACACTGATCGCATTCAAATAAGCCACGTCACCGGTATAATTTCGCCAAAATCTATTAACGTTTAAATTACATATCGACGGGTTTCAATTTCGATAAGGGCCAATCACTCAATCGAAATTGGATTTGATCACGTGATCGGTACCACTTAAGGGTACACCCCACCGTTCGCCTAATAAAACATTTGAAAAATTTGAAAGAGCTCACATCGCTTTATGCTCATCTTACCTGACGATTTTAGTTCATGGGAAAAAGTTGAAAAATACCATATTTACAGCTGTATCTGTGAGATAAAAAGTTCTTCTATATCGATCGAGAAAAATAGAAAAGGAACATTTATAAAACTCGGACTATCGCAACTGATCTAACATAACAGT…	MSERSSSPESCISEEEQAQRTSRHMIAQLMEGVHPSVSTHISRLPHRPRGRTSTKKQMSEEELQDLRLKINGRERKRMHDLNSALEGLREVMPYSGNPSVRKLSKISTLLLAKNYILVLTRSLEELKSLVGDVHKPTSIPTGPMYGARTDFHNINPAASLPSASATVSSPSGLTSLLAPVSTLSPARIPVTNTHVPVTNSRVPVTNPHIPAMNSQVPNMISTGIFPRHPLTFDVSPSGCLPTGRILLPGGLNPTQAIQIPHIDPRVAHEQYRRCLLETQNAK	1.04224	0	2826.22	2271.03	420.809	648.855	90.5665	123.449	37.3768	78.634	41.0639	101.404	21.3588
OFUSG18458.1	10974.6	10.021	0.712543	13.11	2.88693e-39	5.32885e-37	NEUROGLOBIN	NGB1_ONCMY^NGB1_ONCMY^Q:100-552,H:4-152^29.221%ID^E:6.11e-13^RecName: Full=Neuroglobin-1;^Eukaryota; Metazoa; Chordata; Craniata; Vertebrata; Euteleostomi; Actinopterygii; Neopterygii; Teleostei; Protacanthopterygii; Salmoniformes; Salmonidae; Salmoninae; Oncorhynchus	NGB1_ONCMY^NGB1_ONCMY^Q:100-552,H:4-152^29.221%ID^E:6.11e-13^RecName: Full=Neuroglobin-1;^Eukaryota; Metazoa; Chordata; Craniata; Vertebrata; Euteleostomi; Actinopterygii; Neopterygii; Teleostei; Protacanthopterygii; Salmoniformes; Salmonidae; Salmoninae; Oncorhynchus	PF00042.23^Globin^Globin^24-131^E:8.5e-16	.	.	.	PTHR46458:SF1	GO:0005737^cellular_component^cytoplasm`GO:0043204^cellular_component^perikaryon`GO:0020037^molecular_function^heme binding`GO:0046872^molecular_function^metal ion binding`GO:0019825^molecular_function^oxygen binding`GO:0005344^molecular_function^oxygen carrier activity	GO:0005737^cellular_component^cytoplasm`GO:0043204^cellular_component^perikaryon`GO:0020037^molecular_function^heme binding`GO:0046872^molecular_function^metal ion binding`GO:0019825^molecular_function^oxygen binding`GO:0005344^molecular_function^oxygen carrier activity	GO:0020037^molecular_function^heme binding	ATCGATGTTTAATTTCAGGATCTAGGACAAGTATCAGAAACCATGATTTGCGAGCTGTTCGAGAGAGTTCGCTACCAGAACAAAAGCGACAAACTGGTTCTCACAGTCAACGAGAAGCAAAAGTTGAAGCTCAGCTGGACAACCTTCATGGGCGCCAGCCCCACACAGGCTGGGCTTGACATGTTCTACAGGATGTTCGAAAAGTACCCAGAAACCCAGTCTGTTTTCTCCTTCGCCTCTACCAAAGCCGAAGGACAAATGCAAGATACCTCCCGTCTCATGCTTCACATCACCATGGTATCCAAGATGATCGGCGAGGTTGTCGATAAGCTTGACAACCTAGAGAGCATCGTCCCATCTCTTCTTACCCTCGGTGGCAGACACGGAACCAATGGTTAC…	MICELFERVRYQNKSDKLVLTVNEKQKLKLSWTTFMGASPTQAGLDMFYRMFEKYPETQSVFSFASTKAEGQMQDTSRLMLHITMVSKMIGEVVDKLDNLESIVPSLLTLGGRHGTNGYNIPRDFFPFLGESQRELMKEKMGDSFTDDHNALWTKLYQFIIDVMIEGQEKYN	6.22612	0	6256.65	2458.44	35155.7	21912.4	59963.9	57430.2	38421.2	45058.6	21898.8	6951.57	764.434
OFUSG04632.1	9336.65	9.93562	0.823123	11.5941	4.41578e-31	4.65765e-29	CALMODULIN	CML6_ORYSJ^CML6_ORYSJ^Q:124-498,H:17-149^31.579%ID^E:7.48e-14^RecName: Full=Putative calmodulin-like protein 6;^Eukaryota; Viridiplantae; Streptophyta; Embryophyta; Tracheophyta; Spermatophyta; Magnoliopsida; Liliopsida; Poales; Poaceae; BOP clade; Oryzoideae; Oryzeae; Oryzinae; Oryza; Oryza sativa`CML6_ORYSJ^CML6_ORYSJ^Q:319-510,H:12-77^39.394%ID^E:2.98e-08^RecName: Full=Putative calmodulin-like…	CML6_ORYSJ^CML6_ORYSJ^Q:124-498,H:17-149^31.579%ID^E:7.48e-14^RecName: Full=Putative calmodulin-like protein 6;^Eukaryota; Viridiplantae; Streptophyta; Embryophyta; Tracheophyta; Spermatophyta; Magnoliopsida; Liliopsida; Poales; Poaceae; BOP clade; Oryzoideae; Oryzeae; Oryzinae; Oryza; Oryza sativa`CML6_ORYSJ^CML6_ORYSJ^Q:319-510,H:12-77^39.394%ID^E:2.98e-08^RecName: Full=Putative calmodulin-like…	PF13499.7^EF-hand_7^EF-hand domain pair^86-143^E:5.1e-10`PF13833.7^EF-hand_8^EF-hand domain pair^96-145^E:4.1e-06`PF00036.33^EF-hand_1^EF hand^117-144^E:7.9e-08`PF13202.7^EF-hand_5^EF hand^122-142^E:0.0014	.	.	.	PTHR23050:SF424	GO:0005509^molecular_function^calcium ion binding`GO:0030234^molecular_function^enzyme regulator activity`GO:0019722^biological_process^calcium-mediated signaling`GO:0000226^biological_process^microtubule cytoskeleton organization	GO:0005509^molecular_function^calcium ion binding`GO:0030234^molecular_function^enzyme regulator activity`GO:0019722^biological_process^calcium-mediated signaling`GO:0000226^biological_process^microtubule cytoskeleton organization	GO:0005509^molecular_function^calcium ion binding	CCCTGATATTTATTGTGCCTTATTTCACTTCAGTCGTCAGCGTCGCAACACTTAGAACTACGCACAATAAATATGCCTCTTTACAACATCTCTGGATCCCAATACCTTGGTCTGTTGAAATTCTTCAACAGCTACCAGAGGAACAACGTGCTTGGCAAGCAGGAGTTAAGAGCCATCCTCAGTCGTAGAGACATCGAGCCAACCGACAATGAGCTCCAACAGATGATTGACTCCATTAGCGTGGAATCGTCTGGAATCGGCTTCCAAGCGTTCGTCGACTACATCAGCGAGTTTGAAGGGCTCCGTGATCAAGACAAAGACTTCTCCGCCGCTTTCAATATCTTTGACCGTTCTGGCACAGGAGAGCTTTCCCGTGAAGATCTCGCCATCGTCATTGGA…	MPLYNISGSQYLGLLKFFNSYQRNNVLGKQELRAILSRRDIEPTDNELQQMIDSISVESSGIGFQAFVDYISEFEGLRDQDKDFSAAFNIFDRSGTGELSREDLAIVIGKMGQKGTDVDAIIEACDKNNDGKIQYDEFIEVMKKQI	2.07356	5.43754	7913.2	2917.01	47048.7	26234.1	76207.1	56017.6	18858.5	16738.7	62.4335	28.9597	3.8156
OFUSG06603.1	5409.19	9.92078	0.42984	22.5892	5.5333e-113	3.10495e-109	CAVEOLIN	CAV1_DIDVI^CAV1_DIDVI^Q:535-966,H:29-172^38.621%ID^E:1.37e-33^RecName: Full=Caveolin-1;^Eukaryota; Metazoa; Chordata; Craniata; Vertebrata; Euteleostomi; Mammalia; Metatheria; Didelphimorphia; Didelphidae; Didelphis	CAV1_DIDVI^CAV1_DIDVI^Q:535-966,H:29-172^38.621%ID^E:1.37e-33^RecName: Full=Caveolin-1;^Eukaryota; Metazoa; Chordata; Craniata; Vertebrata; Euteleostomi; Mammalia; Metatheria; Didelphimorphia; Didelphidae; Didelphis	PF01146.18^Caveolin^Caveolin^14-137^E:7.9e-41	.	.	.	PTHR10844	GO:0005901^cellular_component^caveola`GO:0005768^cellular_component^endosome`GO:0000139^cellular_component^Golgi membrane`GO:0045121^cellular_component^membrane raft`GO:0070836^biological_process^caveola assembly`GO:0030512^biological_process^negative regulation of transforming growth factor beta receptor signaling pathway`GO:0031623^biological_process^receptor internalization`GO:0031295^biologic…	GO:0005901^cellular_component^caveola`GO:0005768^cellular_component^endosome`GO:0000139^cellular_component^Golgi membrane`GO:0045121^cellular_component^membrane raft`GO:0070836^biological_process^caveola assembly`GO:0030512^biological_process^negative regulation of transforming growth factor beta receptor signaling pathway`GO:0031623^biological_process^receptor internalization`GO:0031295^biologic…	GO:0070836^biological_process^caveola assembly	tcgctactgagattgtcccctccgtacaatattttctgtattgctacgtagaagatcagtggggacaatctcagtggcaaaacggattggcacagcacaagaactggctaatcagaggacttcattttacagaccatatgataaatatgacttatAAACTtcgtcttcgactcaataaagaagaattgtcaaaactcatcaagaatgaacgatcgtgcaaaggttcgagctcaagaacctccctttcttCAAACAAAAAGTTTCGGAAAAACTTGACGGAATCCTAAGCTTCAAGAGATTGCCTAAAAATAGCATGATTTCCAAAAGAGGTGAAGGTTCTCCAAGGGAAGCTTAATACAGGCAGTATCAGCACGTTATCATAGTTACTACAACAGCGAG…	MSSTQELDENRVDMPDMVNRDPNNMNFHARTLFEDVIGEPDGAHSADCVWKNSYGCFTGGKNCCYTVLTYVCALPLALCWGCTFACVTFAHIWQVGPCYRVVQINMSCAQKFFGTCVHCVCDPCYESMSLLLSNIRVLSGNSTELNQYQAGGGVSKELANLPEKSDHIA	18.717	1.08077	12954.4	7738.84	20284.3	15174.4	25906.9	21167.7	20255.3	16189.8	2254.2	2104.92	1906.13
OFUSG09002.1	2455.74	9.86426	0.996183	9.59925	8.05291e-22	3.99895e-20	FAMILY NOT NAMED	LGRD_BREPA^LGRD_BREPA^Q:1917-4844,H:4098-5031^29.058%ID^E:8.69e-92^RecName: Full=Linear gramicidin synthase subunit D;^Bacteria; Firmicutes; Bacilli; Bacillales; Paenibacillaceae; Brevibacillus`LGRD_BREPA^LGRD_BREPA^Q:1137-3674,H:190-1015^26.441%ID^E:1.12e-75^RecName: Full=Linear gramicidin synthase subunit D;^Bacteria; Firmicutes; Bacilli; Bacillales; Paenibacillaceae; Brevibacillus`LGRD_BREPA^L…	LGRD_BREPA^LGRD_BREPA^Q:1917-4844,H:4098-5031^29.058%ID^E:8.69e-92^RecName: Full=Linear gramicidin synthase subunit D;^Bacteria; Firmicutes; Bacilli; Bacillales; Paenibacillaceae; Brevibacillus`LGRD_BREPA^LGRD_BREPA^Q:1137-3674,H:190-1015^26.441%ID^E:1.12e-75^RecName: Full=Linear gramicidin synthase subunit D;^Bacteria; Firmicutes; Bacilli; Bacillales; Paenibacillaceae; Brevibacillus`LGRD_BREPA^L…	PF00551.20^Formyl_trans_N^Formyl transferase^51-154^E:2e-14`PF00501.29^AMP-binding^AMP-binding enzyme^584-992^E:4.2e-67`PF00550.26^PP-binding^Phosphopantetheine attachment site^1112-1162^E:5.5e-07`PF01370.22^Epimerase^NAD dependent epimerase/dehydratase family^1237-1439^E:1.5e-07`PF07993.13^NAD_binding_4^Male sterility protein^1239-1482^E:1.2e-51	.	.	.	PTHR44845	GO:0016853^molecular_function^isomerase activity`GO:0016874^molecular_function^ligase activity`GO:0016491^molecular_function^oxidoreductase activity`GO:0031177^molecular_function^phosphopantetheine binding`GO:0017000^biological_process^antibiotic biosynthetic process	GO:0016853^molecular_function^isomerase activity`GO:0016874^molecular_function^ligase activity`GO:0016491^molecular_function^oxidoreductase activity`GO:0031177^molecular_function^phosphopantetheine binding`GO:0017000^biological_process^antibiotic biosynthetic process	GO:0016742^molecular_function^hydroxymethyl-, formyl- and related transferase activity`GO:0009058^biological_process^biosynthetic process`GO:0003824^molecular_function^catalytic activity`GO:0050662^molecular_function^obsolete coenzyme binding	CTGGCCTGGAACTTATCATGTGTTACATTATACCGATATGATTCTTTATCATCGTTTATCACAATTATTGCATCTACTGCTAGATCAGACCAAACTAATCATCGAGACAAGAACATCTAGTCTTTGACGCTCCAATTCAACATTAGGGCAGCGTTTCAAGAAGCTGGAAGGTGTTCCAAGCAACGGTTACTATGGCAACAAAATGCGTAGTCATTGGAGATGGTCTTCCTTTGTTGGACTGTATCCGGATTATCCATACGAGTGGTTTAAAAGTACTCGCAACATTCAGCAATTCAACTGATGTCCAGAACTGGTGTCAACAGCAAGGAATCAATGTTTTCTTACGGGATGCTGACCTGTTCGAAAACCTCAAGAACGAGAGATTTGATTACTTATTCA…	MATKCVVIGDGLPLLDCIRIIHTSGLKVLATFSNSTDVQNWCQQQGINVFLRDADLFENLKNERFDYLFSVFNQRILTEDELQLPAKYAINYTNAPLPKYAGVHASSWAILNNEVTHGVTWHLMDKSINTGDIVIQETVQISEDDTAFSLNIKCQGAMRSSLQALLIDIKADHLKCTPQNLAKRSYHSFRDSPINAAVIDFKTTSETIHRLTRGLDYGQGENDFTNPKIVTPNGHVLIVLSCALLSGDKGESKPGVVRSIEGDCIVVSTQDSHIELTLGEPDGRPIKTDGIKVYGVHVGTEMPSPNISKLDELGLLQTTEPYWRSILDTYQPTEFFRQQYVDHTEFKDADMYTETISTSNEAMELCRKLKVLDSSDAIKGALVTYIGRVCGKHDINIGL…	7.31055	1.07141	6168.78	7322.58	12480.9	13236.7	7020.44	11403.7	1763.86	2407.55	467.593	3306.74	710.38
OFUSG11654.1	645.944	9.73461	0.92262	9.50653	1.97136e-21	9.43867e-20	GALECTIN-9	.	.	PF00337.23^Gal-bind_lectin^Galactoside-binding lectin^10-132^E:3e-09	.	.	.	PTHR11346:SF80	.	.	GO:0030246^molecular_function^carbohydrate binding	TTTGATGTTGTTTGCTTCAACCAGAACAGATTGCGTCGGAACACCAAGAGCCATTTGAGGCCATCTTTAGCCAACTAACACCATTGAGAGTTGAAACACGAAGGCCTAGTATTTCGGGACTTCAACGACATCAAGCATGGCGACCATGGCCAAGAGGAAAGTATATGAAATAGCCGGGGGATTATATCCAGGAAAGTCCATTGAGATCGGAGGATTGTTTATCAGCTGCAATGGGAACTTCGCAGTTGCCCTTCAGTGTGATCAAATAGGGTCCAGACATATCGGAATCGCTCTGAAGATCTTAGTGGATTATCCTAGTAAAGAATTCACCCTGTCTTGGAACAGAAATGGGACAGAGTCCGAGTTCAAAGTTCAGCCATCCAGCTTTCCCTTCAATAT…	MATMAKRKVYEIAGGLYPGKSIEIGGLFISCNGNFAVALQCDQIGSRHIGIALKILVDYPSKEFTLSWNRNGTESEFKVQPSSFPFNIKEDFSFVLEATKEKYQVRIDGLSFRELEFEHKIPLDTVTHIALENFQSVFRSLEFQDITISHEYENTFTQYADNPEVTRVTPVERVKGANTTQEESVTTVTEITVEESVTTNNEQEDNEVIVEETKQTESVTEALVDDIEEQIEVATTSGVENTHKTTQGNLTDIKTEIITEVLERKPDETIQPQDDEDITTTTEEDKLSFREAVEAVLLNSSVDKAKERIAEFEANNQPIQEVDTVEVKNKPTTTIVYDYDTTNTSSDEKPHEELPCITTIVYDYDTSVSSTHTHEKYDTISAIKNSTSETNRKKTPIVY…	1.04373	2.14548	1588.46	2674.67	1377.57	2271.18	233.325	962.568	1046.55	818.54	2666.97	2086.76	1700.58
OFUSG02255.1	963.49	9.53924	0.921362	9.6529	4.77855e-22	2.42992e-20	PROTEIN MAB-21	MB212_XENTR^MB212_XENTR^Q:629-1684,H:1-352^78.125%ID^E:0^RecName: Full=Protein mab-21-like 2;^Eukaryota; Metazoa; Chordata; Craniata; Vertebrata; Euteleostomi; Amphibia; Batrachia; Anura; Pipoidea; Pipidae; Xenopodinae; Xenopus; Silurana	MB212_XENTR^MB212_XENTR^Q:629-1684,H:1-352^78.125%ID^E:0^RecName: Full=Protein mab-21-like 2;^Eukaryota; Metazoa; Chordata; Craniata; Vertebrata; Euteleostomi; Amphibia; Batrachia; Anura; Pipoidea; Pipidae; Xenopodinae; Xenopus; Silurana	PF03281.15^Mab-21^Mab-21 protein^81-361^E:4.3e-77	.	.	KEGG:xtr:100125071	PTHR10656:SF65	GO:0005737^cellular_component^cytoplasm`GO:0005634^cellular_component^nucleus`GO:0001654^biological_process^eye development	GO:0005737^cellular_component^cytoplasm`GO:0005634^cellular_component^nucleus`GO:0001654^biological_process^eye development	.	GGTAAATACGGCACCAGCTTAGGTTAAAATCAAACAGAAATATAGTCTGAGTCGATATGGAAAGTTAGTTACCGGGCAAGAGTGGCTAGATATCAATCCTTCATGATTATTTGAAAGACGAATGGTAAGCCATCAAGAGTTGCCTAAACAAGAAGAACGTACGCAGAAGAGAAATTCAATTCACAAAATTAAACATCATCTGAAGGACTTCCTTAGGAAACATTAATTATCGACAATTAGAAAATCAATTAGAAAAAAGTTCAGCTTCGAAGAACTTTAATTGGTTATTAAAGTTCAATTGATATGTCAGAAGAAGACTTGTAACTTGTGAAATCTGAGATGTTTTGAATGTCAAAACAGAGGGGCATCAACAAAGTGTATAGCCTGAGACAACCCGTG…	MVYTNGISPDSPDNSTTDMLAAQSKLLFQLNKYYNERVHARKSATSKQVREVCKVVQDVLKEVEVQEPRFISSLTEANNRYEGLEVISPTEFEVVLYLNQMGVFNFVDDGAVPGCAVLKLSDGRKRSMSLWVEFITASGYLSARKIRSRFQTLVAQAVDKCSYRDMVKMVADTTEVKIRIRERYVVNITTAFRCGGIWPRSGAHWPIPHVPWPNPNLVAEVKTEGFDLLSKESTYMKDKQSAAEGDSWVISFLAAENMLLQGGCRRKCLSILKTLRDRHLDVASQPITNYVMKTLLLYECEKHPREVEWDEMCMGDRINGILLQLISCLQNRRCPHYFLPNLDLFKGKSNSSMDSASKQAWRILRELLTNSRSLEKL	1.04312	3.22202	3396.09	1626.24	3678.6	2409.97	1506.94	1711.39	1584.95	1576.33	2618.03	2132.87	3750.58
OFUSG21271.1	1395.2	9.50184	0.76985	10.8303	2.47338e-27	1.91701e-25	PROTEIN, PUTATIVE-RELATED	LARG2_CHICK^LARG2_CHICK^Q:1066-1947,H:457-725^33.333%ID^E:2.83e-36^RecName: Full=LARGE xylosyl- and glucuronyltransferase 2 {ECO:0000250|UniProtKB:Q8N3Y3};^Eukaryota; Metazoa; Chordata; Craniata; Vertebrata; Euteleostomi; Archelosauria; Archosauria; Dinosauria; Saurischia; Theropoda; Coelurosauria; Aves; Neognathae; Galloanserae; Galliformes; Phasianidae; Phasianinae; Gallus	LARG2_CHICK^LARG2_CHICK^Q:1066-1947,H:457-725^33.333%ID^E:2.83e-36^RecName: Full=LARGE xylosyl- and glucuronyltransferase 2 {ECO:0000250|UniProtKB:Q8N3Y3};^Eukaryota; Metazoa; Chordata; Craniata; Vertebrata; Euteleostomi; Archelosauria; Archosauria; Dinosauria; Saurischia; Theropoda; Coelurosauria; Aves; Neognathae; Galloanserae; Galliformes; Phasianidae; Phasianinae; Gallus	PF13896.7^Glyco_transf_49^Glycosyl-transferase for dystroglycan^334-527^E:2.4e-41	.	.	KEGG:gga:423200`KO:K09668	PTHR12270:SF51	GO:0005794^cellular_component^Golgi apparatus`GO:0000139^cellular_component^Golgi membrane`GO:0016021^cellular_component^integral component of membrane`GO:0015020^molecular_function^glucuronosyltransferase activity`GO:0046872^molecular_function^metal ion binding`GO:0016757^molecular_function^transferase activity, transferring glycosyl groups`GO:0042285^molecular_function^xylosyltransferase activi…	GO:0005794^cellular_component^Golgi apparatus`GO:0000139^cellular_component^Golgi membrane`GO:0016021^cellular_component^integral component of membrane`GO:0015020^molecular_function^glucuronosyltransferase activity`GO:0046872^molecular_function^metal ion binding`GO:0016757^molecular_function^transferase activity, transferring glycosyl groups`GO:0042285^molecular_function^xylosyltransferase activi…	.	GCCAAACGAGACAAATTGCTTGAAACGCTTGATTCAACTTTTTCCAACATTGTACCATTTCGAATAAATATCACATACCTGAAAATTCACCTAATAATAGCATGACGTGCTCCAAGTTAAGATCGATAATTTAACGGTGTACCATATGAAGTACAGTATTTATGGTGGACTACTTGCAATAGGACAGATTTTCAGCAAGCACTTTCTCAAAGTAAATGTGCCATAAACTAAAAACACCAGTGGATCGTCACATACGATAAAAGGGAATAAAAGATGGCCAGGCCGATGAAAGTAAAGAAAATACTGTACATAAGTATCACAATTGTTATGATATTCGTTATACTATCATATAAACATACAACAAAAGATACTGTATTAAAACGTCGTGATATTCCTATT…	MARPMKVKKILYISITIVMIFVILSYKHTTKDTVLKRRDIPIDRTTEIKEISLATMDVFDKDDLTLPDGWWVSRKDIWKEENDCGTEGLQSHCAKVLVTKCRPKSKNMNLFIPLKQNEALRGFYLSLRSSGKNLVMNRTLFSDDVFFFGAMVAVRHSDFSTQILEMSLPPGGEGYTKSDLHIVPFGKASVTSITIALTCHGFVGKAKFTDIQLKPILNTQLSDISPSDFVESCPTLPSPLPDTPKFKMKHVVISKGKFDVENSMLTLITQLSLARLDALERVIKIWDGPVAALVVYVPLVEGDDIEDQEKQRQLAHTRIMKVLNSGRIRNCHIIYVYGNQPDEEYPVNHLRNIGIRTVKTEYMFILDVDFIPSSDFQKSFELAFKRQYQTASEARFKKE…	3.13091	0	1856.97	1195.07	7660.6	5630.38	5836.7	6401.19	3545.27	2622.47	1530.63	1134.9	248.489
OFUSG01191.1	399.877	9.37746	0.983676	7.05875	1.68004e-12	3.21314e-11	METALLOENDOPEPTIDASE	.	.	PF00431.21^CUB^CUB domain^129-226^E:1.9e-08	sigP:1^21^0.779^YES	.	.	PTHR45645:SF47	.	.	.	GTGACCATTTTCCTGACACTGAAAAACATCCAAGTTTAATGTTTTATGGGAAATATTTGAATTTATGGTAAAATGGATTATAATCAATTGTAAAGTATAAATACAATGGATCTTATTATTAAATGATTGATAGCATGGATTATATATGAGAACACGAATATTGTGGTTCTGCTGGTTGCTAAAGACAGCTCATATGGAAGAATACGATAGTTATTTTCACAAAAATGTTTAGTGGAATTTTATACACATGGGACTAGCTGATGTCAAAGTATACAAAAAGGAGAGAAAATGATTTTATCAATGAGAATATGTGTAACTTTGGTGTGCGGAGTAATAACGCCGTGTTTAGGTAGTTTTGTTCTGAGTGAATGCTATGGGGCAGTACTTGGGCTCAGTTGT…	MILSMRICVTLVCGVITPCLGSFVLSECYGAVLGLSCRYGHKIHVIEDYFGLSNRTSGTDQCKSMDGDCVVKSRRETSVIHRFCEGQQTCNRFQVDRRHCGENQTNYEQVKFDCIPESSISDICIPTKYETKLGYLSSPLFPNEYSPNLDCQCTLKASDPYVKIELETIHFIVKFDTPCKDWLEIGMGDQKRKVCGPYRATLLSDVYALKFHSDKANGHQGFWMKFSVYPPKSNATVKVECNMIQTTTTTTTTTTEATTTALATTQESEELTDLYDTLGEEYDYKDYTEYIQDSNEVDEDKYKTTATSASTTKYRKPTTQESTDSNTLVETDDPDEYFELEPTYATTSARPVKKKKTKLRKKKVKLRKENKGNEVQLSPTSDTYLLEEDLENLDGLIIE…	1.04298	0	762.151	597.765	1553.98	1258.46	1030.66	1339.03	1558.78	1393.68	622.139	472.002	204.093
OFUSG20648.1	1750.53	9.32649	0.770168	11.3143	1.11537e-29	1.03966e-27	.	.	.	.	sigP:1^21^0.794^YES	.	.	.	.	.	.	GTGTACTTCAACATTTCAATCTCAGGTATAAATACAGGTGATCTATGGACTCTGATTTATAAATGATTGAACATTTTAATAATTCACGATCAAGATGGAGGCGACATTTTCCTGTGTTTTAACAATATTTGTGGCTCTTATAGCTTCGGCGTACAGTACAAGTGAACCAATCCCACCGGGAGTGCATCATTACGGTAGCGACGATGAGCCATGTTCGTCTGATATGTCAATATGTGCAAGCGTCGAGCATTGGGAGGCGTTTGATGGTGAACTCCCTACAACGGTCATAACAAAGAAATGTGGTTGTCAAGGGAATCTCAAGTGCCCTGTGAGTGATAGGTTCGACCCCAACGATGGACATACTGTCATCAAAGGAGGTTTATATTACAAGACATGTGC…	MEATFSCVLTIFVALIASAYSTSEPIPPGVHHYGSDDEPCSSDMSICASVEHWEAFDGELPTTVITKKCGCQGNLKCPVSDRFDPNDGHTVIKGGLYYKTCAPLTSTRRCRRSERALTMSGQKEVVEVRCQCRRGKVPTVYATWKPDEWTYDNPVFPFTNHATCGELRQCDIQTIRRNGKTQPCSKYYPRMNTDGPIPVPVTDFKGEVEMCTCPDSKFCDGRLESEMTAYTMGRDKNGFYDFRYCMGL	4.16388	1.07845	3366.19	1268.97	2261.29	1231.16	2205.66	1762.28	4255.21	4333.42	8381.82	11200	6976.72
OFUSG09473.1	636.786	9.28614	0.799846	9.45527	3.22175e-21	1.50683e-19	.	.	.	.	.	.	.	.	.	.	.	AAGTATGAAGTGCTTAACGCTGAAGAATTTAAACCATACGACAAAGCAACAGAAAATGGAGTCTGTGTTATCAAAAGGAATTAGTTAATTTGCAGTGCTGTTTGAACAAGATCGAAATACAATTTATTTCTACACGGAAGATTGGATCGACTTCATACAAAAAGTAAAAAACTTAAGGCTGAAGGGGCGAGAATTAATAGTCTGGAAAAACAGAAATGCCGAGTCCGCAGCTTATGGATAACATTGAAAACCAACAAAATATTTAGGATAAATCCCAATCAACAAAACTAGGTCCAACGTGTAAGAGGCGGTCATCATGGGTGATATGAAAATAGGAAGCGACAAGCAGATCACTGCAGTCACCCAGAACCTAAAAGAGGATCAGGTGCTCGAGAAAAC…	MGDMKIGSDKQITAVTQNLKEDQVLEKTMQMLDLEESYAIKLLELDHRIVRVNYKRLKNKVGKIKSHLTPEQVAEIRGIEHEGKLSQGYTSINLSGAIKIAAAAKRLKLGVGMPPRPKPPGLPTAPPPTSTAQSKKKPSRASQREKNTSSSRQIDTEPGRRRRSNSVTGVFVDAPSAETGRQRRSSISNVLITNGNQNEHTIDKPLTAAGGRVHITDGELDNISEAASSMTSSNANKLRATTAHPYTRDDPRNKTKLTRRPQTSHLITRLNKSNFSSHAEESNASTSPTRRPRTTAITSNFYEIGNNNDNDDTFGEDPYEQRRKELLTLENSRHDGFSERKKSFMKNIEEYISAKPFPDPLKNWDIIRFLRNQEQFLRRTNSEQRLATDLNTSGRRKRF…	1.04289	1.07448	1149.7	752.199	2471.64	2090.39	2061.45	1678.69	1804.47	1361.86	2104.34	1527.68	177.564
OFUSG07288.1	5641.68	9.27808	0.77787	11.3284	9.48974e-30	8.87512e-28	CD82 ANTIGEN	TSN33_HUMAN^TSN33_HUMAN^Q:378-1193,H:25-281^27.636%ID^E:6.71e-21^RecName: Full=Tetraspanin-33;^Eukaryota; Metazoa; Chordata; Craniata; Vertebrata; Euteleostomi; Mammalia; Eutheria; Euarchontoglires; Primates; Haplorrhini; Catarrhini; Hominidae; Homo	TSN33_HUMAN^TSN33_HUMAN^Q:378-1193,H:25-281^27.636%ID^E:6.71e-21^RecName: Full=Tetraspanin-33;^Eukaryota; Metazoa; Chordata; Craniata; Vertebrata; Euteleostomi; Mammalia; Eutheria; Euarchontoglires; Primates; Haplorrhini; Catarrhini; Hominidae; Homo	PF00335.21^Tetraspanin^Tetraspanin family^23-276^E:1.4e-52	.	.	KEGG:hsa:340348`KO:K17346	PTHR19282:SF44	GO:0005912^cellular_component^adherens junction`GO:0009986^cellular_component^cell surface`GO:0005788^cellular_component^endoplasmic reticulum lumen`GO:0005887^cellular_component^integral component of plasma membrane`GO:0005886^cellular_component^plasma membrane`GO:0046930^cellular_component^pore complex`GO:0097197^cellular_component^tetraspanin-enriched microdomain`GO:0019899^molecular_function^…	GO:0005912^cellular_component^adherens junction`GO:0009986^cellular_component^cell surface`GO:0005788^cellular_component^endoplasmic reticulum lumen`GO:0005887^cellular_component^integral component of plasma membrane`GO:0005886^cellular_component^plasma membrane`GO:0046930^cellular_component^pore complex`GO:0097197^cellular_component^tetraspanin-enriched microdomain`GO:0019899^molecular_function^…	GO:0016021^cellular_component^integral component of membrane	GTATACATATGTGAAGTAAAGACGGTCCTTCACCCACGATAAGACATATTTATTTGGCTTTTAGGAGGCCCATGGAAACGCAATCTTAATCCTTCAAACCCACAATATGCAAATACATGACAATGATAACAATGGATTTTGATTCATAATCATATTTATAGCTACTTATTAAAGGTGACTAGTTATCCATTATCATATTCCTATCTGAAATAGGGCGAGACCAAACCCCAGTGACAAAACTTTAACAATAGGAAATAGGACATAGCAGCAATTCTCATATATTTTTCTAAATAAGATCAAAGATGGGCAAGGGATCAGGTAAAGGAGAGGGTAAAGGCGAAGGAGGAGTGGGATGTTGTGGAGGAATCATCAAACTTTTACTCTTTATCTTCAATGTCG…	MGKGSGKGEGKGEGGVGCCGGIIKLLLFIFNVVFWLIGAAILGVGIWLKVDKNLVENINKLLPGPYLDIIAIVMIVLGALIFLIGFSGCCGACQESICLLAIYITLMVIIIIAEIAVGVFAYVHRNTLEKELGGALKGQVTNDYEFDNGIGYAWNFLQTEFKCCGSAGPKDFENSKWRQSSGNATQGINVPVTCCVPVSKAGNPQTTVAKNPTLCEAAAATAFAGGAPNKDYLYTDGCYDKLLEFIKKYGVYIIAGLGAVAAIQLFGIAFTSFLIHRIKKSKQEENDALEMQGRSNPGMKV	5.21256	1.07528	2793.31	2704.76	9206.09	7912.01	16800.9	17691.1	27794.9	25595.4	12842.4	20816.9	8139.61
OFUSG18467.1	13851.4	9.21422	0.68048	13.4707	2.32642e-41	4.87107e-39	GH15296P	CEX2_CAEEL^CEX2_CAEEL^Q:1429-1965,H:15-189^25.806%ID^E:6.35e-11^RecName: Full=Calexcitin-2;^Eukaryota; Metazoa; Ecdysozoa; Nematoda; Chromadorea; Rhabditida; Rhabditina; Rhabditomorpha; Rhabditoidea; Rhabditidae; Peloderinae; Caenorhabditis`CEX2_CAEEL^CEX2_CAEEL^Q:241-615,H:11-129^28.8%ID^E:7.97e-08^RecName: Full=Calexcitin-2;^Eukaryota; Metazoa; Ecdysozoa; Nematoda; Chromadorea; Rhabditida; Rhab…	CEX2_CAEEL^CEX2_CAEEL^Q:1429-1965,H:15-189^25.806%ID^E:6.35e-11^RecName: Full=Calexcitin-2;^Eukaryota; Metazoa; Ecdysozoa; Nematoda; Chromadorea; Rhabditida; Rhabditina; Rhabditomorpha; Rhabditoidea; Rhabditidae; Peloderinae; Caenorhabditis`CEX2_CAEEL^CEX2_CAEEL^Q:241-615,H:11-129^28.8%ID^E:7.97e-08^RecName: Full=Calexcitin-2;^Eukaryota; Metazoa; Ecdysozoa; Nematoda; Chromadorea; Rhabditida; Rhab…	PF13202.7^EF-hand_5^EF hand^316-330^E:0.03	.	.	KEGG:cel:CELE_T09A5.1	PTHR10827:SF46	GO:0005783^cellular_component^endoplasmic reticulum`GO:0005509^molecular_function^calcium ion binding	GO:0005783^cellular_component^endoplasmic reticulum`GO:0005509^molecular_function^calcium ion binding	GO:0005509^molecular_function^calcium ion binding	CATAAATGTATGATACGGGTACCAACATGGTCAGCAATTACCATACACGTAGCAGGATTATAATCAATTCAGTAAGTATCAAATAGAAGTACTTTTGACCGACATACTCAAACCGAAATTTGAAATTCGAGAGAGCAGCATACACTCTACTACGAGCAGGCCAATTCACTTTGCCTTTTCTCAACGTAGGGGACACACATCTTGTTCAGCATGGCGACAACAGGTTTCAAAGATGATCCTTTTTGGATGTCGAAAATGAAGTATCAGTTTGAAATTTGGTTTGATTTGGATGGCAACGGATCAATTGAAAATGAGGACTTCAACAAGCTTTTCGATAATATGGTAGAGGCAAAGGGGTTGTCACCCGACAGTCCAATGTATGATAGAGCAAAGAACATG…	MATTGFKDDPFWMSKMKYQFEIWFDLDGNGSIENEDFNKLFDNMVEAKGLSPDSPMYDRAKNMKQNMWTILQHNADGDEDKSLSLSEWCIFFDDFAVQYNKRNYIPHWYKEFMAVTFFIMDKNGDELIDASDFVSYYCETHKLPLEIVNTAYKKITSNGKLNLDKFKDMMIGFTVSKDKEHTGNILGEMMVNGRLERMAKNMKDDPFWMSKMRHQFYTWFDCSRDGVIQKKDFDYILQGVVRSKGWANGSPLWKRVEDMTNNFWAELKRAGDTDKDDQITITEWCDFWSDFAANYNTDAELPFWYSEFLQVNFWLYDTNGDGWIDRDEFIAAYNGMYGIPLNIVAATFSNITKDEELDFDINLFREMMLGFTVSTDMKNPGNILGEMLVRLVGCETEFE…	6.26105	30.0497	13560.4	11966.2	61413.7	45326.2	93922.5	74077.3	35169	22722.6	9303.44	5974.57	308.705
OFUSG19269.1	285.063	9.04153	0.98595	6.96894	3.19333e-12	5.88282e-11	INNEXIN	UNC9_CAEEL^UNC9_CAEEL^Q:308-1438,H:10-375^36.126%ID^E:8.01e-86^RecName: Full=Innexin unc-9;^Eukaryota; Metazoa; Ecdysozoa; Nematoda; Chromadorea; Rhabditida; Rhabditina; Rhabditomorpha; Rhabditoidea; Rhabditidae; Peloderinae; Caenorhabditis	UNC9_CAEEL^UNC9_CAEEL^Q:308-1438,H:10-375^36.126%ID^E:8.01e-86^RecName: Full=Innexin unc-9;^Eukaryota; Metazoa; Ecdysozoa; Nematoda; Chromadorea; Rhabditida; Rhabditina; Rhabditomorpha; Rhabditoidea; Rhabditidae; Peloderinae; Caenorhabditis	PF00876.19^Innexin^Innexin^21-385^E:1.2e-107	.	.	KEGG:cel:CELE_R12H7.1`KO:K22037	PTHR11893:SF36	GO:0005911^cellular_component^cell-cell junction`GO:0005921^cellular_component^gap junction`GO:0016021^cellular_component^integral component of membrane`GO:0005886^cellular_component^plasma membrane`GO:0005243^molecular_function^gap junction channel activity`GO:0055077^molecular_function^gap junction hemi-channel activity`GO:0034220^biological_process^ion transmembrane transport	GO:0005911^cellular_component^cell-cell junction`GO:0005921^cellular_component^gap junction`GO:0016021^cellular_component^integral component of membrane`GO:0005886^cellular_component^plasma membrane`GO:0005243^molecular_function^gap junction channel activity`GO:0055077^molecular_function^gap junction hemi-channel activity`GO:0034220^biological_process^ion transmembrane transport	.	TATTGTCACACGCAGCTCAAAGGTACTTTGACTCAACTTTTCAACTATTTCAAAATACGATAAAGTTGAACAACGGGACGCTACTATAGTGCCATATCTTGAATAAAGTCTCCAGAGGATATACGACAACAAAAGGACAAATTTAAAACATTGGATTATTACAAAACATAGTGAAATACACTTCAATAAAATTCAAATGATGAGAAGGACATAAAGATAAATTGAAAATCGTTTTAAATCTGAAAAATAACTTTTAATTAGAGCACTATAAGATAAATTAAACATGGATAAGTTATTAGGAGTTTTAGGGTCTGTTGGTAAAATTGAAACAAGGTTAGACAATGACGGTGTCGACAGACTGAACTATAGGTACACCGTTGGTCTGCTGGGAATATTCTC…	MDKLLGVLGSVGKIETRLDNDGVDRLNYRYTVGLLGIFSLVVTTSQYVGDPMTCWTPAQFTKQMVDYTDDWCWVKGTYYHPMEEVVPRENEPRQFEVAYYIWVPLFLILQGLLFYIPSMIWHIFNSRTGCDINTVVQTASLLGSVVQDKREMNLKHIVRYIDNYLTKNRDKTQRSRVVKIQRFLSQKLCCLCCGKRTGNFMWTLYMLVKVLYIVNVIGQLFILNDFIGSNYHVYGFEVMKDLAQGNDWRSSPVFPRITLCSYKMRVLGNVQRHTLQCVLPVNLFNEKIYIVIWFWYVFVATASCINFVQWLLKSLSSTRRAFFKKHLVWMGRLQPNGNSESDRKLYRMFTEKYLRPDGYLIMRFIAVQCSEFVVSDIVAALWDNYKRMNPLKEGLLEFE…	0	1.07434	488.811	591.511	573.168	856.259	603.476	867.485	971.436	1062.51	319.36	743.941	609.638
OFUSG26182.1	139.353	9.01032	0.969946	6.7289	1.70952e-11	2.87899e-10	BETA-1,3-GALACTOSYLTRANSFERASE BRN	B3GN7_RAT^B3GN7_RAT^Q:594-1259,H:126-341^28.936%ID^E:3.87e-21^RecName: Full=UDP-GlcNAc:betaGal beta-1,3-N-acetylglucosaminyltransferase 7;^Eukaryota; Metazoa; Chordata; Craniata; Vertebrata; Euteleostomi; Mammalia; Eutheria; Euarchontoglires; Glires; Rodentia; Myomorpha; Muroidea; Muridae; Murinae; Rattus	B3GN7_RAT^B3GN7_RAT^Q:594-1259,H:126-341^28.936%ID^E:3.87e-21^RecName: Full=UDP-GlcNAc:betaGal beta-1,3-N-acetylglucosaminyltransferase 7;^Eukaryota; Metazoa; Chordata; Craniata; Vertebrata; Euteleostomi; Mammalia; Eutheria; Euarchontoglires; Glires; Rodentia; Myomorpha; Muroidea; Muridae; Murinae; Rattus	PF01762.22^Galactosyl_T^Galactosyltransferase^188-381^E:5.2e-31	.	.	KEGG:rno:316583`KO:K09664	PTHR11214:SF247	GO:0005783^cellular_component^endoplasmic reticulum`GO:0005794^cellular_component^Golgi apparatus`GO:0000139^cellular_component^Golgi membrane`GO:0016021^cellular_component^integral component of membrane`GO:0008376^molecular_function^acetylgalactosaminyltransferase activity`GO:0008375^molecular_function^acetylglucosaminyltransferase activity`GO:0008532^molecular_function^N-acetyllactosaminide bet…	GO:0005783^cellular_component^endoplasmic reticulum`GO:0005794^cellular_component^Golgi apparatus`GO:0000139^cellular_component^Golgi membrane`GO:0016021^cellular_component^integral component of membrane`GO:0008376^molecular_function^acetylgalactosaminyltransferase activity`GO:0008375^molecular_function^acetylglucosaminyltransferase activity`GO:0008532^molecular_function^N-acetyllactosaminide bet…	GO:0008378^molecular_function^galactosyltransferase activity`GO:0006486^biological_process^protein glycosylation`GO:0016020^cellular_component^membrane	GTGCCCATGTACACTAATTGGTGTGGTAAACTCACATTGGTTTAATTTAAGGCACATACAGCATATGGACATTTGGACAAGCGACAAAATTACAACAAGTAAAAATGCGACGATGGCAGACTCCATTACTATTACTATTTATCATTCTAATAATTGTTAGTTTCATTAACTTTAAAACTTTATATAAAACACAGAATAACAAATTGGAAGAGAGGGAACACCACAAAACACCAGTTCCAACTTATCAACCAAATCATGGAAATGAGGAAAATATAAAGACACAAAATGACATCAAAGAGCTGATTAGACTGGCTAAATCATCTGAACTGAAGCTCGATGAACAAACAAATCTTATTCAGGAACAAGCTGCGAAGATAGACAAAATCGAGACAGGGTTAC…	MRRWQTPLLLLFIILIIVSFINFKTLYKTQNNKLEEREHHKTPVPTYQPNHGNEENIKTQNDIKELIRLAKSSELKLDEQTNLIQEQAAKIDKIETGLQETRSSQNIETPNSTYKECAHVQIKDVPQIVERTNASKVPVEFYNLRFQNNYLDDFKFVHLESDVCSGVKNEKFIIFVVITDTTENAKATREVLRETWAGVKTHSDWTIRTVYLMGSTNDTHRMASIADESKKYGDIIQASCGDAYRDMSLKVMMALKWVEKYCANAKYVFRGTHDIVFHFGRFFEKINELSKITTESDNVFWGCPSTNMNIIHHGDKKFEKWAQDSPVVWESKQYPTYLGGSGFLMNLQAVRSVNRLYCRTPITWPDDTHMGAFIELLGVPPRGEKLYCQWIQFERLRPN…	1.04159	0	475.942	601.375	731.37	858.486	257.511	324.277	158.596	140.854	44.0934	47.9825	74.4456
OFUSG13119.1	702.214	8.97114	0.586619	14.9322	2.03393e-50	7.41116e-48	PR DOMAIN ZINC FINGER PROTEIN 14	PRD14_HUMAN^PRD14_HUMAN^Q:1207-2361,H:193-570^60.519%ID^E:3.09e-159^RecName: Full=PR domain zinc finger protein 14;^Eukaryota; Metazoa; Chordata; Craniata; Vertebrata; Euteleostomi; Mammalia; Eutheria; Euarchontoglires; Primates; Haplorrhini; Catarrhini; Hominidae; Homo	PRD14_HUMAN^PRD14_HUMAN^Q:1207-2361,H:193-570^60.519%ID^E:3.09e-159^RecName: Full=PR domain zinc finger protein 14;^Eukaryota; Metazoa; Chordata; Craniata; Vertebrata; Euteleostomi; Mammalia; Eutheria; Euarchontoglires; Primates; Haplorrhini; Catarrhini; Hominidae; Homo	PF00856.29^SET^SET domain^450-506^E:0.00013`PF13913.7^zf-C2HC_2^zinc-finger of a C2HC-type^572-590^E:0.16`PF00096.27^zf-C2H2^Zinc finger, C2H2 type^600-622^E:7.8e-06`PF13912.7^zf-C2H2_6^C2H2-type zinc finger^600-623^E:0.11`PF00096.27^zf-C2H2^Zinc finger, C2H2 type^628-650^E:0.00083	.	.	KEGG:hsa:63978	PTHR16515:SF19	GO:0005654^cellular_component^nucleoplasm`GO:0005634^cellular_component^nucleus`GO:0031490^molecular_function^chromatin DNA binding`GO:0046872^molecular_function^metal ion binding`GO:0008168^molecular_function^methyltransferase activity`GO:0003723^molecular_function^RNA binding`GO:0000977^molecular_function^RNA polymerase II transcription regulatory region sequence-specific DNA binding`GO:0001708…	GO:0005654^cellular_component^nucleoplasm`GO:0005634^cellular_component^nucleus`GO:0031490^molecular_function^chromatin DNA binding`GO:0046872^molecular_function^metal ion binding`GO:0008168^molecular_function^methyltransferase activity`GO:0003723^molecular_function^RNA binding`GO:0000977^molecular_function^RNA polymerase II transcription regulatory region sequence-specific DNA binding`GO:0001708…	GO:0005515^molecular_function^protein binding`GO:0003676^molecular_function^nucleic acid binding	ATTTAATCCCAGCAAAACGAAAAACCAAGAGCAAATTGATGATAATTCAGATGTGTGAACAACACTCCCGTCGCGTGTGAGGAAAATAAAAAATCATCGAGCAGACGAAATACGGTTAGCAGAAGAAAGGAGTCACTCCATTGGCGAAGCTCATAGGGAATTGAGATAATTTATTCAAATTAACTACAGCGATTCTCACGACAATAGTATAAACTACGGACGATTGGATGAAACATGTCAGATGTTCAGCCAATTTCCATCCAAAATATGCAGCACCCCTTTCATCATATTATCGCCCAGCAAGCGCCGGCTTTTCCGCAACAAACGCCAGTATTCACACAGCAAGTGTACAACCAGGCGCCTCCTCAAGGTATGTCCGTAATACCGCAGATCATGGTT…	MSDVQPISIQNMQHPFHHIIAQQAPAFPQQTPVFTQQVYNQAPPQGMSVIPQIMVPGSHLHHGYISPQMGSPVQYLDALQPQLRMFLPQNTGHMNHSPPDMVQEAELRQYWNNMYINKLNMSKESLEKAQKDLRTPSPKSEENNSEKDNNELNCSRLQSEKNIIDNCTVKEEMNTEQSNIPYPQYVPKSLYVRQTIHQHLMKSPDAKISNEVENKNEEDTQNSGQSTITSPKITTASSSLPPFSPLSSLNCSSATSLLSTLASNSHITNRQPFTGQHHSPPTYSSHPTIQLPHLSTTPDHANHGPHFAIPSLPKDQRHRIYAPVAKYGFSREELDVSLYGYTRPTNAEFAVGHAISGLSTEKDSPKKHDAVMDSGNIEASKESNLDIPQGLRIIKTSYA…	8.34791	4.29297	3662.76	3525.02	2199.81	2894.61	1636.73	1089.32	821.877	769.312	980.264	655.185	689.315
OFUSG19148.1	11869.2	8.87268	0.474468	18.5263	1.2675e-76	2.54016e-73	KAZAL-TYPE SERINE PROTEASE INHIBITOR DOMAIN CONTAINING PROTEIN	IGFBP_CUPSA^IGFBP_CUPSA^Q:357-1082,H:2-244^44.309%ID^E:2.98e-61^RecName: Full=Insulin-like growth factor-binding protein-related protein 1;^Eukaryota; Metazoa; Ecdysozoa; Arthropoda; Chelicerata; Arachnida; Araneae; Araneomorphae; Entelegynae; Lycosoidea; Ctenidae; Cupiennius	IGFBP_CUPSA^IGFBP_CUPSA^Q:357-1082,H:2-244^44.309%ID^E:2.98e-61^RecName: Full=Insulin-like growth factor-binding protein-related protein 1;^Eukaryota; Metazoa; Ecdysozoa; Arthropoda; Chelicerata; Arachnida; Araneae; Araneomorphae; Entelegynae; Lycosoidea; Ctenidae; Cupiennius	PF00219.19^IGFBP^Insulin-like growth factor binding protein^26-83^E:4.4e-08`PF07648.16^Kazal_2^Kazal-type serine protease inhibitor domain^99-140^E:3.7e-07`PF00050.22^Kazal_1^Kazal-type serine protease inhibitor domain^100-140^E:2.4e-06`PF13927.7^Ig_3^Immunoglobulin domain^144-232^E:1.6e-13`PF07679.17^I-set^Immunoglobulin I-set domain^144-245^E:1e-12`PF13895.7^Ig_2^Immunoglobulin domain^144-236^E…	sigP:1^20^0.907^YES	.	.	PTHR14186:SF19	GO:0005576^cellular_component^extracellular region`GO:0005520^molecular_function^insulin-like growth factor binding`GO:0004867^molecular_function^serine-type endopeptidase inhibitor activity`GO:0001558^biological_process^regulation of cell growth	GO:0005576^cellular_component^extracellular region`GO:0005520^molecular_function^insulin-like growth factor binding`GO:0004867^molecular_function^serine-type endopeptidase inhibitor activity`GO:0001558^biological_process^regulation of cell growth	GO:0005520^molecular_function^insulin-like growth factor binding`GO:0005576^cellular_component^extracellular region`GO:0005515^molecular_function^protein binding	CACTTTATTTAGCTCGTTCAATCGAACTAACCTAAatcttttatttttatataatttatatttaCAAGTACTTATTTGGTGTAGATAAATGTTGATCAAAATGTGGCAAACATCTCCGATTAGAAGGGTGGCTTATCTCCACAAGTCTGGTGTAATATAATCTCAGTACAAAGTTCCTACTAGTGGTAGTTTGCTAATAAACCCACTGCCAGCTAAATTTAGACAGCAACCTTCCTGCCACGTAGCTCTGATACTAACACAGTGAACATACTTCAACAACAACAAAAATCGTCCATTTTCCACTGAAATTTGAAGTGCAGTTTGGACAACGGAGAAGTAAATACATCATGGATCGCTGGGTCGCGATTGCGTTGCTGTTGTGTGGGGTGGTAGGAACAA…	MDRWVAIALLLCGVVGTILAQSDKDCQPCNLSICEKPVGCEAGITKDRCGCCEVCAQTEGELCDHADVPTKEYHGRCGDNLECRIRNDVGRKSNREAVCMCTMNDYLCGSDGNTYVNLCRVVANAVATQTKIKVEHKGACKSAPMIVSPPENQRNLTGDNVVLSCEVKGFPIPSVEWYYKRGNDIEISLPSDDEHISVNSRGGPEKYEVTGWVQIIDVQSYHQGDYFCKARNALGEAEEHARVSIYKPGDERY	28.1576	7.52167	9693.61	8205.43	26117.5	21891.4	39908.1	42888.3	52365.9	50704.2	15425.9	18536.2	34458.6
OFUSG08071.1	275.534	8.86553	1.00371	6.5213	6.97026e-11	1.06924e-09	ZINC FINGER PROTEIN GFI-1B	GFI1B_CHICK^GFI1B_CHICK^Q:932-1432,H:169-335^84.431%ID^E:6.37e-90^RecName: Full=Zinc finger protein Gfi-1b;^Eukaryota; Metazoa; Chordata; Craniata; Vertebrata; Euteleostomi; Archelosauria; Archosauria; Dinosauria; Saurischia; Theropoda; Coelurosauria; Aves; Neognathae; Galloanserae; Galliformes; Phasianidae; Phasianinae; Gallus	GFI1B_CHICK^GFI1B_CHICK^Q:932-1432,H:169-335^84.431%ID^E:6.37e-90^RecName: Full=Zinc finger protein Gfi-1b;^Eukaryota; Metazoa; Chordata; Craniata; Vertebrata; Euteleostomi; Archelosauria; Archosauria; Dinosauria; Saurischia; Theropoda; Coelurosauria; Aves; Neognathae; Galloanserae; Galliformes; Phasianidae; Phasianinae; Gallus	PF00096.27^zf-C2H2^Zinc finger, C2H2 type^222-245^E:0.00053`PF13912.7^zf-C2H2_6^C2H2-type zinc finger^251-275^E:0.076`PF00096.27^zf-C2H2^Zinc finger, C2H2 type^279-301^E:3.5e-05`PF13894.7^zf-C2H2_4^C2H2-type zinc finger^279-301^E:0.00022`PF13912.7^zf-C2H2_6^C2H2-type zinc finger^279-290^E:0.11`PF00096.27^zf-C2H2^Zinc finger, C2H2 type^307-329^E:0.0026`PF00096.27^zf-C2H2^Zinc finger, C2H2 type^335…	.	.	KEGG:gga:395977`KO:K09223	PTHR24399:SF41	GO:0016363^cellular_component^nuclear matrix`GO:0005654^cellular_component^nucleoplasm`GO:0005886^cellular_component^plasma membrane`GO:0005667^cellular_component^transcription regulator complex`GO:0046872^molecular_function^metal ion binding`GO:0000978^molecular_function^RNA polymerase II cis-regulatory region sequence-specific DNA binding`GO:0001085^molecular_function^RNA polymerase II transcri…	GO:0016363^cellular_component^nuclear matrix`GO:0005654^cellular_component^nucleoplasm`GO:0005886^cellular_component^plasma membrane`GO:0005667^cellular_component^transcription regulator complex`GO:0046872^molecular_function^metal ion binding`GO:0000978^molecular_function^RNA polymerase II cis-regulatory region sequence-specific DNA binding`GO:0001085^molecular_function^RNA polymerase II transcri…	GO:0003676^molecular_function^nucleic acid binding	GACATATTGTTTGCTTTCTGCCACTCAGCCTATAGAGTTATGTTATAAGCGATATGGTATAAAGACCAAGGCGCAACCAACGGCAATCAAAGCGAGATTTTGGAAGCTGAGGTTTACAGACGTCTGGCACACGACCTACACGCGACACGACACTGCATGAGGAACCAGCACTATAGAAGCTGCAGCCCTAAGGAATGCCAGAAATATAAACATATTTTTAGACCCATTTTTAACATTTATTACACGGCATTAAGAAACGGATTAGTGAAATATGCCTAAGTCATTTTTGATAAAACATATAAAAGACGAAGAAATGGGTGGAAACGGTGATGCGAAAAGTGATGCAAATAATTCTACGGAAGAAATGCAACCAACGGCAGGGAGTGCTTTTCGAATTGT…	MPKSFLIKHIKDEEMGGNGDAKSDANNSTEEMQPTAGSAFRIVTPRQAKDERNTEGQTCSTSPIAASSPPGLSPTGSGKTSIIPPTLSPFFTALPTSPASTHTRPQIVRPWLDDFSSHKAPTLSPYSQQIKEMLLETEGKISYTDLYRAHLARLNYEQAKKAFMARTSAQLYQEALEGSMLRIRRESLEGRILQSDGLDQNYVPESEEIVPGSTFSGVHGTYKCMKCNKLFSTPHGLEVHVRRSHSGKRPFACDICSKTFGHSVSLSQHRTVHSQEKTFICKQCGKTFKRSSTLSTHLLIHSDTRPYPCQYCGKRFHQKSDMKKHTYIHTGEKPHKCLECGKAFSQSSNLITHSRKHTGYKPFNCTTCARSFQRKVDLRRHIETQHNDNKLAAATVLKQ…	0	1.07586	644.191	355.893	1035.47	873.256	694.347	1224.18	664.183	719.205	303.484	288.561	626.291
OFUSG14966.1	553.549	8.79195	0.966428	6.59322	4.30398e-11	6.80703e-10	DLIM1	LHX5_RAT^LHX5_RAT^Q:1057-2046,H:2-279^55.891%ID^E:1.79e-97^RecName: Full=LIM/homeobox protein Lhx5;^Eukaryota; Metazoa; Chordata; Craniata; Vertebrata; Euteleostomi; Mammalia; Eutheria; Euarchontoglires; Glires; Rodentia; Myomorpha; Muroidea; Muridae; Murinae; Rattus	LHX5_RAT^LHX5_RAT^Q:1057-2046,H:2-279^55.891%ID^E:1.79e-97^RecName: Full=LIM/homeobox protein Lhx5;^Eukaryota; Metazoa; Chordata; Craniata; Vertebrata; Euteleostomi; Mammalia; Eutheria; Euarchontoglires; Glires; Rodentia; Myomorpha; Muroidea; Muridae; Murinae; Rattus	PF00412.23^LIM^LIM domain^9-63^E:5.2e-14`PF00412.23^LIM^LIM domain^68-126^E:3.2e-17`PF00046.30^Homeodomain^Homeodomain^236-292^E:1.1e-19`PF05920.12^Homeobox_KN^Homeobox KN domain^258-287^E:3.4e-05	.	.	KEGG:rno:124451`KO:K18493	PTHR24208:SF105	GO:0005634^cellular_component^nucleus`GO:0000981^molecular_function^DNA-binding transcription factor activity, RNA polymerase II-specific`GO:0046872^molecular_function^metal ion binding`GO:0000977^molecular_function^RNA polymerase II transcription regulatory region sequence-specific DNA binding`GO:0021846^biological_process^cell proliferation in forebrain`GO:0007267^biological_process^cell-cell s…	GO:0005634^cellular_component^nucleus`GO:0000981^molecular_function^DNA-binding transcription factor activity, RNA polymerase II-specific`GO:0046872^molecular_function^metal ion binding`GO:0000977^molecular_function^RNA polymerase II transcription regulatory region sequence-specific DNA binding`GO:0021846^biological_process^cell proliferation in forebrain`GO:0007267^biological_process^cell-cell s…	GO:0003677^molecular_function^DNA binding`GO:0006355^biological_process^regulation of transcription, DNA-templated	GCAGTCTAAGCCAAAGTTTCCACATAGCCATTGAAATGGAGAATAAAAGCAGAAGTTTGCTTTCGTGTTAGTCTGAATAGGGAAACAAACGGAGTGTTAGTCTCAAATGTCGGCAATATTCACTTTGTATCGTTTTTGTATGGAAAACACGGTCAAAATAAAACCACACGCATCTTTGTTTTGCACAGGGTTGTAGGTTATGTGGAGCAAATTGCGTTAAAATGTTGTTGCCACCATCTACAATGGATAAACGTTGGGAATGAGTAGGTAAATATATAGGCCTGGGATTCGACTCTGATATTTGTGTCGTCAGAATCATTAAAGACAAATATTGTAGTAAAATGTAATCAGCGTCAGTGACTGCTTGTAATTGTGTAGTTCCAGCCATGTATACAAGCA…	MQKKKIVLCAGCDNPITDRFIFNVLDATWHSHCVKCSDCHSTLADKCFSRSGQLYCKDDFFRRYGTKCGGCGDGISPNDLVRRARDKVFHLRCFTCIVCRKQLSTGEELYVLEENKFICKEDYLKSSYAGSDQEDLDDFEDLLDNNNFSSNISDKDSTISTEDSHVTTPNPSAQSHTSTNSNKYFKDTEEVLSPEFKDIDDINLKSPQSVDNVSEAGDTNNNTENQDNSSNSTKRRGPRTTIKAKQLETLKAAFAATPKPTRHIREQLAKETGLNMRVIQVWFQNRRSKERRMKQLSAYGARRHFFRASRRMRALGGALEFGDMEMLGPNGIDYYPESSPEFYGQGPPPQGDYYPCPPRDPRDIGGNMDYLHGFGPGGQTQLEPGMNPSGMGRFNYNDM…	0	1.07211	498.782	497.306	2490	2175.86	795.045	740.631	975.256	944.744	1884.54	1564.36	2356.51
OFUSG25538.1	139.342	8.7854	1.0466	6.32365	2.55462e-10	3.63832e-09	.	.	.	.	.	.	.	.	.	.	.	TTTTGATAAAAGAAAATATGGAGATATTTTCTTACATTTGATAAGGAGTCCTTGTAATCGTTTAAGCCTAGTGATCGCCTGTTCGTCTAGTAGACTACCCTTATTCATAATATAAGATCCAGTTTTCTGACTTTGAAACTTTGGAAACGGTTGTCAACATTTGTATGTTGATAAGAAAATACCTCATGGGGATTTTGAAGAAAGGTGAAATGGAATCATCCCGGTCAAAGTCAAAAAAGACATCCAAGAGCAAATCCAAACCTCCTCCGGAGACGCTTTTTGAATATAATGCGGATGACGATGACACGGACATTGAAAAGGACGGAGAGAAAGAGAGCGATGACTACCTCACGGAGGATGAAACAATTGACCAACGAATTCAACAAGGAAGAGAGGATA…	MLIRKYLMGILKKGEMESSRSKSKKTSKSKSKPPPETLFEYNADDDDTDIEKDGEKESDDYLTEDETIDQRIQQGREDIEQRQSDFDQWKVEFGEKKDTLVNRYTSMRRRSSIHVKFLEQELLKDVVTNYQQSKNSKSKKTTLVNKTKQNTSRKNIRPTKS	1.03982	0	545.814	348.014	189.698	326.08	251.447	329.016	569.731	586.088	244.649	279.599	85.4875
OFUSG22241.1	1383.74	8.73612	0.619877	13.4271	4.19478e-41	8.46712e-39	INNEXIN	UNC9_CAEEL^UNC9_CAEEL^Q:631-1752,H:8-372^36.267%ID^E:1.34e-85^RecName: Full=Innexin unc-9;^Eukaryota; Metazoa; Ecdysozoa; Nematoda; Chromadorea; Rhabditida; Rhabditina; Rhabditomorpha; Rhabditoidea; Rhabditidae; Peloderinae; Caenorhabditis	UNC9_CAEEL^UNC9_CAEEL^Q:631-1752,H:8-372^36.267%ID^E:1.34e-85^RecName: Full=Innexin unc-9;^Eukaryota; Metazoa; Ecdysozoa; Nematoda; Chromadorea; Rhabditida; Rhabditina; Rhabditomorpha; Rhabditoidea; Rhabditidae; Peloderinae; Caenorhabditis	PF00876.19^Innexin^Innexin^24-385^E:2.2e-113	.	.	KEGG:cel:CELE_R12H7.1`KO:K22037	PTHR11893:SF36	GO:0005911^cellular_component^cell-cell junction`GO:0005921^cellular_component^gap junction`GO:0016021^cellular_component^integral component of membrane`GO:0005886^cellular_component^plasma membrane`GO:0005243^molecular_function^gap junction channel activity`GO:0055077^molecular_function^gap junction hemi-channel activity`GO:0034220^biological_process^ion transmembrane transport	GO:0005911^cellular_component^cell-cell junction`GO:0005921^cellular_component^gap junction`GO:0016021^cellular_component^integral component of membrane`GO:0005886^cellular_component^plasma membrane`GO:0005243^molecular_function^gap junction channel activity`GO:0055077^molecular_function^gap junction hemi-channel activity`GO:0034220^biological_process^ion transmembrane transport	.	ATTAGAATAGGATTGGCAAGTTTCATTTTTTAAATTAATTTTGGCAAACTCTGGCAATTGGATTATGTAGCTCGTTAAATCTAGTTAAGGCTTAATAATTTCATCCAACAGACGTTTCACTATAGAACCGTTGGTATTAATCCTATGTGGTTCAAATATACAGAATTGTTCTAAATAATCTTTTAAGAATTAAAGGACTGTGAAAGAGTACGAACTTTAATACAATTGGATTTAGACTGAAAAGACCTTGTAGAAAGGTGGATTAAAAGTGTCAGGATACATTTGTTCAGATGTCTAGTATTAGAATCTATCAAATGCAGTACTAGTTTGGGTTTGTCATTGTTATATGTATGTAAGGGACTTAGTCATTGGTTGGTAAACAAGATGGCGAATGTGAAC…	MGNLMSGISTLATRAGGKNKRADDDFSDRLNYKFTTFMLLVFCMLVTGRQHVGHPINCWCPARFKDPQIDYANSLCWTKNTYYVPIEGDIPKSDSGRTRLELQYYQWVPIVLLVQAVLFYFPCVIWRLLHDKSGVNITTLCTTLEDKGNLDPDTRNKTIRYIVRHLHRCFDMIRIHSSHGCQRHTQKLVKKCPLICGKRYGNYILSLYVACKMLYIGNAIGQVYILNAFLGNGTDYSFYGVGVLVDMLKSRDWTTSDRFPRVTLCDFKIREFAHNIHRYTLQCVLPINLFNEKIYIILWFWFVLVAIVNSYSLLQWLFYMAGNNKVDYIKRHLKNMGMFDKESDKKYLNTFVEEYMQHDGVFVMRLMTKNACDISVSEIVCGLFTIFKQSRTNGSIM	5.21441	2.14902	2473.62	1209.16	6077.96	4122.57	5526.88	5562.35	3283.77	3847.51	2802.46	2193.52	253.813
OFUSG00087.1	734.188	8.70164	0.999177	7.92914	2.20671e-15	5.76477e-14	PHOSPHATIDYLETHANOLAMINE N-METHYLTRANSFERASE	PLMT_YEAST^PLMT_YEAST^Q:136-702,H:16-204^36.508%ID^E:7.09e-38^RecName: Full=Phosphatidyl-N-methylethanolamine N-methyltransferase {ECO:0000255|HAMAP-Rule:MF_03216, ECO:0000305};^Eukaryota; Fungi; Dikarya; Ascomycota; Saccharomycotina; Saccharomycetes; Saccharomycetales; Saccharomycetaceae; Saccharomyces	PLMT_YEAST^PLMT_YEAST^Q:136-702,H:16-204^36.508%ID^E:7.09e-38^RecName: Full=Phosphatidyl-N-methylethanolamine N-methyltransferase {ECO:0000255|HAMAP-Rule:MF_03216, ECO:0000305};^Eukaryota; Fungi; Dikarya; Ascomycota; Saccharomycotina; Saccharomycetes; Saccharomycetales; Saccharomycetaceae; Saccharomyces	PF04191.14^PEMT^Phospholipid methyltransferase^92-191^E:6.3e-22	.	.	KEGG:sce:YJR073C`KO:K00551	PTHR15458	GO:0071944^cellular_component^cell periphery`GO:0005783^cellular_component^endoplasmic reticulum`GO:0005789^cellular_component^endoplasmic reticulum membrane`GO:0016021^cellular_component^integral component of membrane`GO:0031966^cellular_component^mitochondrial membrane`GO:0005739^cellular_component^mitochondrion`GO:0080101^molecular_function^phosphatidyl-N-dimethylethanolamine N-methyltransfera…	GO:0071944^cellular_component^cell periphery`GO:0005783^cellular_component^endoplasmic reticulum`GO:0005789^cellular_component^endoplasmic reticulum membrane`GO:0016021^cellular_component^integral component of membrane`GO:0031966^cellular_component^mitochondrial membrane`GO:0005739^cellular_component^mitochondrion`GO:0080101^molecular_function^phosphatidyl-N-dimethylethanolamine N-methyltransfera…	.	TCGGTGCCTCGATTCACAGTGACCAATCAATCATTGATGTAAACATTACAAATTTATTTCAGGACCCATCACTGAATCTCGGAATTAAGATCAATTTGGACAATTTTAGCAAACATGTCCTTTCTGCATGACCTGATCGATTTGGATGATTGGAATCTATGGATGACAATTGTTTGCATGGCATTGAGCCCAACTTGGTGGTTCGTTTCTGCGAGGTTTGAATATCATACAAGATACATTACTAAGCTCTTTGGAAACAAATACACAGCATGTTACGTAACTGGAGTCATTACCCTGGCTTTAGATTGCATACGAGACTGGAGGTATCACATACTAATGGCAGAGCAGCCAAAATGGGCAGTATTACAGAATGACACGGTCGAAGCAATAGGAAATGGC…	MSFLHDLIDLDDWNLWMTIVCMALSPTWWFVSARFEYHTRYITKLFGNKYTACYVTGVITLALDCIRDWRYHILMAEQPKWAVLQNDTVEAIGNGLTIFGLVMVLSTWYQMGYTGILYGDYFDILKNERVTGFPYNVFNDPQYLAFNIVTFGTSVSHGSFIGLLLSIYHVFLMKTIAWLEDPFTSMIYEKRAKQESLKSDANGHSNGVGSKSSSVHKSKSKRNAHSNGTNGVSNGAIKNRKG	0	3.23795	1015.17	944.382	2262	2192.45	1692.49	2075.63	2527.9	3343.59	422.303	3167.19	155.132
OFUSG03211.1	453.277	8.69221	0.591257	14.0108	1.33954e-44	3.47996e-42	HEART- AND NEURAL CREST DERIVATIVES-EXPRESSED PROTEIN 2	HAND2_DANRE^HAND2_DANRE^Q:276-950,H:1-207^46.256%ID^E:1.75e-40^RecName: Full=Heart- and neural crest derivatives-expressed protein 2;^Eukaryota; Metazoa; Chordata; Craniata; Vertebrata; Euteleostomi; Actinopterygii; Neopterygii; Teleostei; Ostariophysi; Cypriniformes; Cyprinidae; Danio	HAND2_DANRE^HAND2_DANRE^Q:276-950,H:1-207^46.256%ID^E:1.75e-40^RecName: Full=Heart- and neural crest derivatives-expressed protein 2;^Eukaryota; Metazoa; Chordata; Craniata; Vertebrata; Euteleostomi; Actinopterygii; Neopterygii; Teleostei; Ostariophysi; Cypriniformes; Cyprinidae; Danio	PF00010.27^HLH^Helix-loop-helix DNA-binding domain^105-156^E:1.6e-16	.	.	.	PTHR23349:SF41	GO:0005634^cellular_component^nucleus`GO:0000981^molecular_function^DNA-binding transcription factor activity, RNA polymerase II-specific`GO:0046983^molecular_function^protein dimerization activity`GO:0000977^molecular_function^RNA polymerase II transcription regulatory region sequence-specific DNA binding`GO:0055007^biological_process^cardiac muscle cell differentiation`GO:0010002^biological_pro…	GO:0005634^cellular_component^nucleus`GO:0000981^molecular_function^DNA-binding transcription factor activity, RNA polymerase II-specific`GO:0046983^molecular_function^protein dimerization activity`GO:0000977^molecular_function^RNA polymerase II transcription regulatory region sequence-specific DNA binding`GO:0055007^biological_process^cardiac muscle cell differentiation`GO:0010002^biological_pro…	GO:0046983^molecular_function^protein dimerization activity	agatcaaactatcaaacatcaaatatTTAGCAGTGATTCTAATACGAACCAGAGACAGTAAATTGTAGCATTTTGAGTGTTCGGTGCAGGTTTATACAAGTATCGGAACCAGAGGAGAATAAGCCAGTGTGTAGCTAATAAAGAGAACAGTTTACCGCTGAGTAGTCGTGTTTTCCGTCCTGATACAAGTTATCCAGGCGAGCCCACTAGAGATACTCCACTTCGGACAAGATAGCAAGAAGTACTTCAAGGGGAGATATATATAAGACTTCAAGATGAGTTTGGTGGGTGGTTATCCCCAAAACTTTCATTCTACAGGGCCACATCACGAGTATTACGCAGCCTATCCACAAACCAGGTACCAAGAATCGCAGTTCGCGCACACGCATTCCGAACCTT…	MSLVGGYPQNFHSTGPHHEYYAAYPQTRYQESQFAHTHSEPYFQNWMVSPPGLSPDMPISENVNVYGGYTNSPSPGGDPNCQMEAMHRMGYTIGPDGQIVRVVKRKNTANKKERRRTVSINTAFANLRGCIPNVPSDTKLSKIKTLRLATSYIAYLTDVLNKEDDKNVEEFKADLSRKNESREEKKRKEMALLSSDLENSNTSSSEKKNKGRTGWPQTVWAQELK	2.0819	5.39245	1654.54	1758.83	1625.08	1302.09	547.049	763.061	439.583	559.139	848.108	831.559	1899.17
OFUSG00601.1	115.505	8.5569	1.10769	7.21678	5.32347e-13	1.06915e-11	OTOGELIN	.	.	.	.	.	.	PTHR11339:SF228	.	.	.	TTGATTGTACTACATATACTAATTTTGTCAGTTTGAATAATTTTGTTAACTGCTTTTAATCGATGGGAACTGGAATGAAGTTGTTTTGATCAAGCTGAAACCAGCAAAGGTTCTTTTGCCAATTACACTTAGCTTTTATACACTGGCGACAACATAAAGGACCACCGAAATATGATAGGGAAAAATAGTTCATACAAATTATAAGATGGATTTAAAATTAAAATGCACTTTGACATTGGAACAAAGCTGGATTTTGATACTTCTCTCATTTCTCATGTCGAATGCAATGTGTGGTCAGGTTCGTAATCAGAGACTTGGATGCTTCGCGGAGGAGGAATCTCCGACTTTGGCACTTTTCTGTCCAGAGGGCCAGTTCCTAAGGATCGTTTCATCCAAGTT…	MDLKLKCTLTLEQSWILILLSFLMSNAMCGQVRNQRLGCFAEEESPTLALFCPEGQFLRIVSSKFGLSRFRLCFRIVHDCVEEGSSLEGCCGQQSCQFTVNRRYLQTCGGSSSYYQVLYECVDYIQDAGCRTTTVSTISLPPTTSVPTRRWPTTTPHPFNKFLHTNRSTVRVTISNVSNTPRHRTSIAKIIEFLSNIVNRNSTQATGQSTILSNLTTTPAPPVRVTNVPPFWNTFLKTTVTPPDDHTFRTLGRTVYTAYPIKTTTPSIEFAPTHWSNATEIPDTQSFDTESEMKSEQVTLSGQPLVYGSTEPGTKTRDMSLLDFWRSLLSSKTTTVTTTATITTTSPAEIDKLTQVHVKNTEEQIFTSPSVNTFETTSTQAVQKEISSQYDISDSTQPT…	1.04402	2.14427	1358.79	522.331	84.6379	174.619	104.737	119.233	102.663	182.603	118.983	154.838	156.476
OFUSG17838.1	234.423	8.50999	1.0301	6.37726	1.80286e-10	2.61681e-09	INWARDLY RECTIFYING POTASSIUM CHANNEL 1, ISOFORM F-RELATED	IRK1_CAEEL^IRK1_CAEEL^Q:1480-2556,H:49-410^44.475%ID^E:2.08e-104^RecName: Full=Inward rectifier potassium channel irk-1;^Eukaryota; Metazoa; Ecdysozoa; Nematoda; Chromadorea; Rhabditida; Rhabditina; Rhabditomorpha; Rhabditoidea; Rhabditidae; Peloderinae; Caenorhabditis	IRK1_CAEEL^IRK1_CAEEL^Q:1480-2556,H:49-410^44.475%ID^E:2.08e-104^RecName: Full=Inward rectifier potassium channel irk-1;^Eukaryota; Metazoa; Ecdysozoa; Nematoda; Chromadorea; Rhabditida; Rhabditina; Rhabditomorpha; Rhabditoidea; Rhabditidae; Peloderinae; Caenorhabditis	PF01007.21^IRK^Inward rectifier potassium channel transmembrane domain^89-229^E:1.4e-52`PF17655.2^IRK_C^Inward rectifier potassium channel C-terminal domain^236-404^E:5.1e-67	.	.	KEGG:cel:CELE_R03E9.4`KO:K05330	PTHR11767:SF107	GO:0016021^cellular_component^integral component of membrane`GO:0043005^cellular_component^neuron projection`GO:0043025^cellular_component^neuronal cell body`GO:0043204^cellular_component^perikaryon`GO:0005886^cellular_component^plasma membrane`GO:0005242^molecular_function^inward rectifier potassium channel activity`GO:1990573^biological_process^potassium ion import across plasma membrane`GO:000…	GO:0016021^cellular_component^integral component of membrane`GO:0043005^cellular_component^neuron projection`GO:0043025^cellular_component^neuronal cell body`GO:0043204^cellular_component^perikaryon`GO:0005886^cellular_component^plasma membrane`GO:0005242^molecular_function^inward rectifier potassium channel activity`GO:1990573^biological_process^potassium ion import across plasma membrane`GO:000…	.	GTAAGTTATTACTATTTTTGATTACATTTAGCAAGTGGTGACTTATCACTTAAGGCCAAAGTGTTATAAATGGTCTACAAGAATAAGAAACCTGAGAGGGAGCAGTCCATAAATGTAAATAAAACTTCCAAGTATGGCTGGATAATGTTACAAGCAGGAACAATGATCCGTCTCATAAGTGTAAAGAAACACGAGGTGTAGAACCAACATTGTACATCCTGATAGAGTTTACAGTACAACTACAAGTCGACAATACATGTACTGGGCCACAAGTTCTGAACAGGAGTAGGAAAACAAATACTTTAATATTAATACACTGTATTGGCTGGGTGCAGTTATTGAACGCCTTCTGAACAGAGACAGCCGCCTTCCCACGACATTCAAAGTTTAATGGCCGGG…	MCTNPRQSLDLEPEDRYENIEKNRNSDWRRDSRYVPSRMSVSGHHNTWLNSVFRRRTDSVTKYLQSTGRRVSLNDLHSQTLKRNRKRLVAKNGDRNIIQTDIKRRGQGYLADIFVTLVDTKWRLILLMFVSGFILSWLVFALLWWIICFSHGDFEHTSDIDWVPCVDAVEDFPTALLFSIETQHTIGYGGRATTSKCPEAIILMMLQSCMGTLMQAILTGIVFSKIQRPKRRSHTLIFSKNAVICMREGNLCLLFRVGDMRRSHMIGAHIRAIKVKKSVTKEGEVLPLFEQDVAFHVPPDGNLFLVWPVMACHIIDKNSPFYNISSEDLQRDKFELIVILEGTIESTGMSAQARTSYLPCEILWGHRFRRLTMYQKDTGEYQIRYNNFHATVPVDTPNC…	0	1.07231	348.393	470.226	909.161	818.072	909.363	667.151	439.339	354.598	377.258	225.873	785.747
OFUSG18743.1	272.333	8.39689	1.15587	5.9341	2.95453e-09	3.66146e-08	PROTEIN CBG18972	.	.	PF03269.15^DUF268^Caenorhabditis protein of unknown function, DUF268^164-308^E:6e-37	sigP:1^26^0.655^YES	.	.	PTHR31562:SF4	.	.	.	AACGATTTCATTTACTCAGTAGTATACAGTTGGAATGATCAAGGACATGGAAACTGGAGTCAATATATGTTTGTTAATCGCCATTTTCAACTATTTGGCTACAACAGTGGCTGAAGTGAATTACTCCGGAGACTTCAACAAGCAATGTTACTCCCGGGAATCAGAATCCCCGGGGATATATTTCCCGGTAATCAGAAGACACTGGGACTGTCCAGAGATGTTAAGTGAGATGGGGGAGGAACAAGACGAAACAGAATGGCCCCCACCCAGATTTCCACCAGAAGATCAATTCTTTGAGTTCACCATGAACGGGCTCATGCCCATACAGCGGATGTGGTACTTCTCTCGGGCGCAGGAGAAAAATCTCGGAAAGAGTAACAACATCGATCCACATTGGAC…	MIKDMETGVNICLLIAIFNYLATTVAEVNYSGDFNKQCYSRESESPGIYFPVIRRHWDCPEMLSEMGEEQDETEWPPPRFPPEDQFFEFTMNGLMPIQRMWYFSRAQEKNLGKSNNIDPHWTETSIKQLQSKTKSDEVISSYEVESDRLIKKTLEKFRDNIDEKHGIVIGSERPWLEAHLLNANAKHVTTLEYGSIKSDHSKISTLTPVELSKRFQEKALSQFDFGFTYSSLEHSGLGRYGDPLDPCGDLKTMACAWCIIKPGGLFFLNVPTSKDNSSHTFWNAHRVYGRERLKFMAANWNVVDKITYPTNNPDTDTVWVFQKP	0	1.07976	493.788	285.229	2053.16	1716.09	781.137	1049.41	337.867	428.6	61.9407	105.897	26.1781
OFUSG05358.1	818.82	8.39335	0.84061	8.32192	8.65462e-17	2.66545e-15	.	.	.	.	.	.	.	.	.	.	.	GATGGAGGTAGCTAGGGAACTTAAGCAGCTTAGGCTCGAGTATTCTTTGAACAGTCTCAAAGCTTTGTGAAGGTTTAATCGCAATTATTTGATTAAGGAAATATACTCAAAGAGCTCTTTAGAAACTTTGGTACGACCTTGTATATGCCGTATAAAGAGATTAAACATTAGTTTATTTGGCTACAAAATATGGCGGACACTGAATAACATTTAGAACATTCAAAATGAGTTAAACTTGGGTAAATGTGAGTTATTCCTTGATAAAAGGTATGAATAATACCTGTAATAATGTCAGAAATACCTTGATGAAATAAAAAGAGATATGATTTAAAGATAGAGAAACATTAGGGCAAATACTTGAAGGATTGACAAAATACAAAATAACAATGGCGACTTTGG…	MATLDMIVIKGSISLHWMIYSAVLGTCLELVYGQATNGTTVSPTTTAANTVTEAEAFNLSLYVPASVISIVLLTSVALCAVGVARCVEFSHTKREANRDDVSDMSEHTKEMLRKTMRATQLGTEAFKLEIEKSKEEKEREAKKIAGAWANKLREKSKMGFGKSKTSSQKNGGVFKGLNMAKPNDQKKDNNQNTNSDESKDIPSTDETLKLAALALGKESDKPSDGVKGTINHAFTKDKTDPNAEISPRVSSDKPKAKEDTPSSIINVRERTDSSVTAKSAKSNYSVSHVKIETL	0	2.15057	691.815	373.575	997.158	933.565	1934.9	1771.38	3326.72	2469.17	5306.5	3672.03	626.841
OFUSG25173.1	894.078	8.33139	0.645925	12.1112	9.2123e-34	1.17486e-31	HOMEOBOX PROTEIN SIX1	SIX1_MOUSE^SIX1_MOUSE^Q:295-849,H:3-187^92.973%ID^E:9.51e-124^RecName: Full=Homeobox protein SIX1;^Eukaryota; Metazoa; Chordata; Craniata; Vertebrata; Euteleostomi; Mammalia; Eutheria; Euarchontoglires; Glires; Rodentia; Myomorpha; Muroidea; Muridae; Murinae; Mus; Mus	SIX1_MOUSE^SIX1_MOUSE^Q:295-849,H:3-187^92.973%ID^E:9.51e-124^RecName: Full=Homeobox protein SIX1;^Eukaryota; Metazoa; Chordata; Craniata; Vertebrata; Euteleostomi; Mammalia; Eutheria; Euarchontoglires; Glires; Rodentia; Myomorpha; Muroidea; Muridae; Murinae; Mus; Mus	PF16878.6^SIX1_SD^Transcriptional regulator, SIX1, N-terminal SD domain^24-134^E:2.4e-48`PF00046.30^Homeodomain^Homeodomain^145-195^E:3.9e-14`PF05920.12^Homeobox_KN^Homeobox KN domain^160-193^E:3.9e-12	.	.	KEGG:mmu:20471`KO:K15614	PTHR10390:SF13	GO:0005737^cellular_component^cytoplasm`GO:0005730^cellular_component^nucleolus`GO:0005654^cellular_component^nucleoplasm`GO:0005634^cellular_component^nucleus`GO:0005667^cellular_component^transcription regulator complex`GO:0003682^molecular_function^chromatin binding`GO:0003677^molecular_function^DNA binding`GO:0001228^molecular_function^DNA-binding transcription activator activity, RNA polymer…	GO:0005737^cellular_component^cytoplasm`GO:0005730^cellular_component^nucleolus`GO:0005654^cellular_component^nucleoplasm`GO:0005634^cellular_component^nucleus`GO:0005667^cellular_component^transcription regulator complex`GO:0003682^molecular_function^chromatin binding`GO:0003677^molecular_function^DNA binding`GO:0001228^molecular_function^DNA-binding transcription activator activity, RNA polymer…	GO:0003677^molecular_function^DNA binding`GO:0006355^biological_process^regulation of transcription, DNA-templated	CAGCCTTCATCGGCAAACTTGTAGAGCACCTAATCGACCAATCAGAGCAGCCCTGTGGACTGCTAGATTCGCATAGAAATAATAGGTGAAAGATGCGAGAGCCTCACACGTCGGGTTGTTTTCATCACTGAGCAACTTTCTACTGCGTCTTCCGAGTTTGGAAGTTATAGTTTTGTATGTTTGGAGCGACTGTTTACATCTACCACGACGGCTATCAACGGAGGTTCAGTTCATAACGCATATATGTTACACGATCAGGCATCTGGGGCGGGGGTTGGAGCCTCCCCCACCCCCATGCTTCCATCATTTGGCTTCACCCAGGAGCAGGTGGCTTGCGTCTGCGAAGTCCTTCAACAAGGGGGTAATATCGAGAGACTAGCCAGGTTTCTATGGTCACTA…	MLHDQASGAGVGASPTPMLPSFGFTQEQVACVCEVLQQGGNIERLARFLWSLPACEHLHKNESVLKAKAVVAFHRGNFRELYKILESNNFNSHNHPKLQALWLKAHYVEAEKLRGRPLGAVGKYRVRRKFPLPRTIWDGEETSYCFKEKSRTVLREWYAHNPYPSPREKRELAEGTGLTTTQVSNWFKNRRQRDRASEQKDRGDGQGDGDSSMVGSGVKQEDDSDLDDMTALGHTELDSPTGGNMYADLVQQKSSPSQQQANAMVLQYAQHHQQMPISTTHPGITQPSQQSLGLTMTNTNSGIPHPQHPGSVQAHPGLLTEYQTL	4.1723	2.14822	1269.16	1192.33	1677.56	1469.07	1132.22	1372.44	1308.91	1412.08	3943.97	3689.02	5600.09
OFUSG03905.3	539.353	8.32928	0.91819	7.68066	1.5827e-14	3.71908e-13	MUCIN-12	.	.	.	.	.	.	PTHR24041:SF25	.	.	.	ACTAATTCAGCCAGTACAGATGGACTTACTAATTCAGTCAATACAGATACAACTAATACAGTTACATCGGGGGATGGAACTACACCATCTAACGCAACGAGAAATGAAACAACGGATGAGGCCACTACTCTCACAGTGACAAGCACCACGACACAAACAACAACAACGACCCCTCCGAATTCTACACCGGTTGATATATCAAATGAGAAAATAGCGATCCCAGTTGTATTTACAAATATAGATAGCTCAGGATGTGCCACAGAAAGAGAATCGTTTCAAAAACAGTTAACTGATGGGTTAACATCGACACCAAATGCAACCGTCACTTGCGAGGATTGCTCAGCAAGTACCGATAGTTTAATGTGTAAAGTAGAATACCCAGCTGTAACCTTGATAGAG…	TNSASTDGLTNSVNTDTTNTVTSGDGTTPSNATRNETTDEATTLTVTSTTTQTTTTTPPNSTPVDISNEKIAIPVVFTNIDSSGCATERESFQKQLTDGLTSTPNATVTCEDCSASTDSLMCKVEYPAVTLIENNNRNSTFTTELGNVIREAAKNVTFTNGTSASVDDDKLNIALGVAGQIVNDPCGEFCNATQRCRSNSLYAGSALACESKCALFLEDDCKGGQGTCTLDYEKNEPFCKCNADHIYLFKTCVNQWYIVGGVAGLVVLLIIIIIVVAVCCRRRSPPKQSEEERSLRHERDLKSYDNNGYTSHPTESYEMEKPNYVQPTYDDNLPAQNVRNERMATPADNTYTELQNTDAYKNFFPQLEHVDPTVDYSIKRPTFRHNDYQYDRK	2.08624	0	530.951	517.395	1442.42	1530.45	1910.27	1388.56	1290.04	993.598	890.887	660.092	3382.07
OFUSG03905.4	277.317	8.32559	1.15741	5.88963	3.87069e-09	4.70373e-08	MUCIN-12	SSPH2_SALTY^SSPH2_SALTY^Q:527-147,H:266-406^35.461%ID^E:1.38e-11^RecName: Full=E3 ubiquitin-protein ligase SspH2;^Bacteria; Proteobacteria; Gammaproteobacteria; Enterobacterales; Enterobacteriaceae; Salmonella`SSPH2_SALTY^SSPH2_SALTY^Q:518-153,H:299-424^39.683%ID^E:1.44e-11^RecName: Full=E3 ubiquitin-protein ligase SspH2;^Bacteria; Proteobacteria; Gammaproteobacteria; Enterobacterales; Enterobact…	SSPH2_SALTY^SSPH2_SALTY^Q:527-147,H:266-406^35.461%ID^E:1.38e-11^RecName: Full=E3 ubiquitin-protein ligase SspH2;^Bacteria; Proteobacteria; Gammaproteobacteria; Enterobacterales; Enterobacteriaceae; Salmonella`SSPH2_SALTY^SSPH2_SALTY^Q:518-153,H:299-424^39.683%ID^E:1.44e-11^RecName: Full=E3 ubiquitin-protein ligase SspH2;^Bacteria; Proteobacteria; Gammaproteobacteria; Enterobacterales; Enterobact…	.	sigP:1^24^0.678^YES	.	KEGG:stm:STM2241`KO:K15353	PTHR24041:SF25	GO:0005576^cellular_component^extracellular region`GO:0030430^cellular_component^host cell cytoplasm`GO:0020002^cellular_component^host cell plasma membrane`GO:0016020^cellular_component^membrane`GO:0003824^molecular_function^catalytic activity`GO:0061630^molecular_function^ubiquitin protein ligase activity`GO:0004842^molecular_function^ubiquitin-protein transferase activity`GO:0009405^biological…	GO:0005576^cellular_component^extracellular region`GO:0030430^cellular_component^host cell cytoplasm`GO:0020002^cellular_component^host cell plasma membrane`GO:0016020^cellular_component^membrane`GO:0003824^molecular_function^catalytic activity`GO:0061630^molecular_function^ubiquitin protein ligase activity`GO:0004842^molecular_function^ubiquitin-protein transferase activity`GO:0009405^biological…	.	ATGGATCTGAATGCTCGACGTTACATGTTAGTGCTCGGAATGTGTATGCTGACCCTAGGTGCATCGCAAAGTACAACGGAAAATACAGTTACTACAGATGAAAGTACAACGGAAAATACAGTTACGACAGATGGACTGACAACTAATTCAGCCAGCACAGATGGAATGACAACTAATTCAGCCAGTTCAGATGGAATGACAACTAATTCAGCCAGTACAGATGGAATGACAACTAATTCAGCCAGTTCAGATGGAATGACAACTAATTCAGCCAGTTCAGATGGAATGACAACTAATTCAGCCAGTGCAGATGGAATGACAACTAATTCAGCCAGTTCAGATGGAATGACAACTAATTCAGCCAGTTCAGATGGAATGACAACTAATTCAGCCAGTTCA…	MDLNARRYMLVLGMCMLTLGASQSTTENTVTTDESTTENTVTTDGLTTNSASTDGMTTNSASSDGMTTNSASTDGMTTNSASSDGMTTNSASSDGMTTNSASADGMTTNSASSDGMTTNSASSDGMTTNSASSDGMTTNSESSDGMTSSDGMTTNSAITDGMTTNSASSDGMTTNSASTDGLTNSVNTDTTNTVTSGDGTTPSNATIASESTASNTSTASESITTTASDSITTSSESNTTKVSGSNTTQLVSTVLSITNTQSMGNETTDEATTLTVTSTTTQTTTTTPPNSTPVDISNEKIAIPVVFTNIDSSGCATERESFQKQLTDGLTSTPNATVTCEDCSASTDSLMCKVEYPAVTLIENNNRNSTFTTELGNVIREAAKNVTFTNGTSASVDDD…	0	1.07502	186.168	716.836	328.652	675.292	249.387	1109.5	753.348	792.485	473.535	423.445	1768.28
OFUSG13935.2	185.004	8.31473	1.1074	6.79947	1.05006e-11	1.81413e-10	BCL-2-RELATED OVARIAN KILLER PROTEIN	BOKA_DANRE^BOKA_DANRE^Q:512-964,H:23-183^36.025%ID^E:1.89e-26^RecName: Full=Bcl-2-related ovarian killer protein homolog A {ECO:0000305};^Eukaryota; Metazoa; Chordata; Craniata; Vertebrata; Euteleostomi; Actinopterygii; Neopterygii; Teleostei; Ostariophysi; Cypriniformes; Cyprinidae; Danio	BOKA_DANRE^BOKA_DANRE^Q:512-964,H:23-183^36.025%ID^E:1.89e-26^RecName: Full=Bcl-2-related ovarian killer protein homolog A {ECO:0000305};^Eukaryota; Metazoa; Chordata; Craniata; Vertebrata; Euteleostomi; Actinopterygii; Neopterygii; Teleostei; Ostariophysi; Cypriniformes; Cyprinidae; Danio	PF00452.20^Bcl-2^Apoptosis regulator proteins, Bcl-2 family^92-193^E:3.9e-25	.	.	.	PTHR11256:SF48	GO:0016021^cellular_component^integral component of membrane`GO:0005741^cellular_component^mitochondrial outer membrane`GO:0046982^molecular_function^protein heterodimerization activity`GO:0042803^molecular_function^protein homodimerization activity`GO:0097192^biological_process^extrinsic apoptotic signaling pathway in absence of ligand`GO:0008630^biological_process^intrinsic apoptotic signaling …	GO:0016021^cellular_component^integral component of membrane`GO:0005741^cellular_component^mitochondrial outer membrane`GO:0046982^molecular_function^protein heterodimerization activity`GO:0042803^molecular_function^protein homodimerization activity`GO:0097192^biological_process^extrinsic apoptotic signaling pathway in absence of ligand`GO:0008630^biological_process^intrinsic apoptotic signaling …	GO:0042981^biological_process^regulation of apoptotic process	GGTATACACTCAAATTGCGAATGGATTCTGTGTTTCAAATTACGAATATAAGTAATTTCAGCAAGGCCAAGATTTGGCTCATGCGTAAATTTTACGAGAATTATAATATTTAGGAAACATGGTAATCCAGCTGAGACTTGAGAGAATTTTAGTTAGGATTCAAGAGCATTTCAGTAAAGATAGGATACGACTTAATTCCGAGAGAGGAGTGGACTTAAATTTGGATAAGTAAAATTCATTTAGGATACGAGTTAATTACAACTGAACCACGAGTAAATTCGAACTTAGAAACGATCGAGTGAATTTTATGTAGGATACATATGCAAATTATATATTGCTGTCCATTTACGAGTATAGTGTATTCAAGCTCTCAAAAATGGCCCAAAATGATCGGTCCTT…	MAQNDRSFTRRLMRNPKLTKMAKKLRDTFGYDLQEEFGWNLTEMATQKEIAMQGRTICKDYIYHKLRKMGLLNKKVTLQATAKSSDISFQIQYLGSEMEKNHPDVYKNISRQLAVTMNSEKIVRETFMQVVENIFEDGRITWGRIVSLFPLAGSFSVDCVQQSHGEFVNTVVDAVATVVENKLVGWIQQQGGWIELMLSHRARDKKHLYILSAFGATIGFATTLVVIATWV	2.0831	0	808.943	617.051	530.832	772.747	327.462	575.437	275.434	222.288	216.032	261.655	297.699
OFUSG17865.2	678.266	8.29309	0.96145	7.33927	2.14767e-13	4.52721e-12	NETRIN 5	NET1_HUMAN^NET1_HUMAN^Q:473-2203,H:25-601^63.823%ID^E:0^RecName: Full=Netrin-1;^Eukaryota; Metazoa; Chordata; Craniata; Vertebrata; Euteleostomi; Mammalia; Eutheria; Euarchontoglires; Primates; Haplorrhini; Catarrhini; Hominidae; Homo	NET1_HUMAN^NET1_HUMAN^Q:473-2203,H:25-601^63.823%ID^E:0^RecName: Full=Netrin-1;^Eukaryota; Metazoa; Chordata; Craniata; Vertebrata; Euteleostomi; Mammalia; Eutheria; Euarchontoglires; Primates; Haplorrhini; Catarrhini; Hominidae; Homo	PF00055.18^Laminin_N^Laminin N-terminal (Domain VI)^55-289^E:2.6e-83`PF00053.25^Laminin_EGF^Laminin EGF domain^291-340^E:3.2e-08`PF00053.25^Laminin_EGF^Laminin EGF domain^348-408^E:7.6e-09`PF00053.25^Laminin_EGF^Laminin EGF domain^411-454^E:6.6e-10`PF01759.22^NTR^UNC-6/NTR/C345C module^489-598^E:4.6e-28	.	.	KEGG:hsa:9423`KO:K06843	PTHR10574:SF383	GO:0005604^cellular_component^basement membrane`GO:0005737^cellular_component^cytoplasm`GO:0005576^cellular_component^extracellular region`GO:0009887^biological_process^animal organ morphogenesis`GO:0033564^biological_process^anterior/posterior axon guidance`GO:0006915^biological_process^apoptotic process`GO:0032488^biological_process^Cdc42 protein signal transduction`GO:0098609^biological_proces…	GO:0005604^cellular_component^basement membrane`GO:0005737^cellular_component^cytoplasm`GO:0005576^cellular_component^extracellular region`GO:0009887^biological_process^animal organ morphogenesis`GO:0033564^biological_process^anterior/posterior axon guidance`GO:0006915^biological_process^apoptotic process`GO:0032488^biological_process^Cdc42 protein signal transduction`GO:0098609^biological_proces…	.	GGTAAATGAGAAGGCAAAATAGTTCGTAAGTTACAGCTTAGCTTCAGGCATATTGGTTACTAACTTAACACATGTGAAACAACATCGAATAGGACAGCAATTAGTAGGAGCTGTAAACCCCGGCAAGATAACAGAGCAGACTCTCAGAGGCGAGCACAATTAACACGATGTAAAGATAAAGAAAAATAATTTAAAGAACACGAATTTGGGATACTTAAATTAGTAGGATATAAACTATAACTTATTCTGGATTAAAATTGAAGACGCGAATGGACAGATAAGTAAAGTTCTGTATTTGACTCAATCAATACATTTACTCGGTGTTAATGAGGGGTTAATAATTAAAAACGTCTGGTAAAATATATAGGCCTATACAGACACTGCCGATATGGGTCAAAG…	MGQRKWNMPFLTIILTYCICVISIDGFESPFLNAFSSQQSPPDPCYDEIGEPRRCTPDFENAAFTKEVVASSTCGSPPSRYCKLKATNDKGGDVVRSCYVCDANHPKRRHPPSYLTDLNNPSNLTCWMSEPFTASPENVTLKLSLGKKYELTYVSLQFCSARPDSMAIYKSIDYGKTWIPFQFYSSNCKKMYHRNPQGKITKANEQEALCTDSYSNIDPHSQGRVAYSTLEGRPSASEFDNSPVLQDWVTATDVMIVFNRLHTDENSADKSKEVLDSYYYALSDFAVGGRCRCNGHASRCIKNDRDNRLVCDCKHNTAGYDCERCKPFHFDRPWARATLREANECIACNCNLHAQRCRFNKELYLLSGRESGGVCLKCRHNTAGRHCHYCKEGYYRDHT…	0	2.14496	214.314	1018.7	1343.55	1747.28	730.071	1955.33	1098.76	1249.14	2846.04	2832.05	3249.24
OFUSG18413.1	1083.54	8.29276	0.690551	11.9507	6.4356e-33	7.68355e-31	COMPLEMENT FACTOR PROPERDIN-RELATED	FAT2_DROME^FAT2_DROME^Q:88-405,H:4104-4194^33.333%ID^E:1.44e-10^RecName: Full=Fat-like cadherin-related tumor suppressor homolog;^Eukaryota; Metazoa; Ecdysozoa; Arthropoda; Hexapoda; Insecta; Pterygota; Neoptera; Holometabola; Diptera; Brachycera; Muscomorpha; Ephydroidea; Drosophilidae; Drosophila; Sophophora`FAT2_DROME^FAT2_DROME^Q:55-387,H:4167-4262^31.579%ID^E:2.7e-06^RecName: Full=Fat-like c…	FAT2_DROME^FAT2_DROME^Q:88-405,H:4104-4194^33.333%ID^E:1.44e-10^RecName: Full=Fat-like cadherin-related tumor suppressor homolog;^Eukaryota; Metazoa; Ecdysozoa; Arthropoda; Hexapoda; Insecta; Pterygota; Neoptera; Holometabola; Diptera; Brachycera; Muscomorpha; Ephydroidea; Drosophilidae; Drosophila; Sophophora`FAT2_DROME^FAT2_DROME^Q:55-387,H:4167-4262^31.579%ID^E:2.7e-06^RecName: Full=Fat-like c…	PF00090.20^TSP_1^Thrombospondin type 1 domain^1-47^E:1.6e-08`PF19030.1^TSP1_ADAMTS^Thrombospondin type 1 domain^1-47^E:5.4e-06`PF00008.28^EGF^EGF-like domain^97-127^E:2.1e-06	.	.	KEGG:dme:Dmel_CG7749`KO:K16506	PTHR22906:SF21	GO:0098858^cellular_component^actin-based cell projection`GO:0009925^cellular_component^basal plasma membrane`GO:0031254^cellular_component^cell trailing edge`GO:0005925^cellular_component^focal adhesion`GO:0005887^cellular_component^integral component of plasma membrane`GO:0005886^cellular_component^plasma membrane`GO:0005509^molecular_function^calcium ion binding`GO:0050839^molecular_function^c…	GO:0098858^cellular_component^actin-based cell projection`GO:0009925^cellular_component^basal plasma membrane`GO:0031254^cellular_component^cell trailing edge`GO:0005925^cellular_component^focal adhesion`GO:0005887^cellular_component^integral component of plasma membrane`GO:0005886^cellular_component^plasma membrane`GO:0005509^molecular_function^calcium ion binding`GO:0050839^molecular_function^c…	.	TGGGGAGCATGTTCTACAACATGTGGAGATGGAGACCAAACTCGTACAAGAGCATGTGACAACCCAGCTCCAGCTAATGGAGGAAGCGAATGTAGTCCAAGTGATCTGACAGCTACACAGTCTTGCAATGATGGGGATTGCCCCGTAACTTGCAATGAAGGTGTAAGTATCCCATGGAACGATGGACTCAGCTGTATCTGTCCCCCACACAAAACTGGCCTACAATGCGAAGAAGATGTTGTTGGAGCTCCAAGCTGCTCATGTTCATGGCCAGAAACCAATGATCCATGTGCTCAAAATCCATGCCTTGGTGACTCGATTTGTGTCAACACATTCGGTAATAATTATAGATGTCTCTGTCCAGCTGGCTCTTCTGGGGAACAATGCGAACAGGGTACA…	WGACSTTCGDGDQTRTRACDNPAPANGGSECSPSDLTATQSCNDGDCPVTCNEGVSIPWNDGLSCICPPHKTGLQCEEDVVGAPSCSCSWPETNDPCAQNPCLGDSICVNTFGNNYRCLCPAGSSGEQCEQGTFCFRC	42.8368	7.72817	12101.5	5259.03	5822.48	5274.79	347.605	352.613	3.06115	3.81264	13.428	3.78866	0.884935
OFUSG24844.2	3455.73	8.2153	0.719723	11.354	7.08822e-30	6.65131e-28	UREA ACTIVE TRANSPORTER	DUR3_ARATH^DUR3_ARATH^Q:287-1399,H:44-421^43.846%ID^E:1.5e-82^RecName: Full=Urea-proton symporter DUR3;^Eukaryota; Viridiplantae; Streptophyta; Embryophyta; Tracheophyta; Spermatophyta; Magnoliopsida; eudicotyledons; Gunneridae; Pentapetalae; rosids; malvids; Brassicales; Brassicaceae; Camelineae; Arabidopsis`DUR3_ARATH^DUR3_ARATH^Q:1604-2368,H:404-648^30.233%ID^E:6.63e-13^RecName: Full=Urea-prot…	DUR3_ARATH^DUR3_ARATH^Q:287-1399,H:44-421^43.846%ID^E:1.5e-82^RecName: Full=Urea-proton symporter DUR3;^Eukaryota; Viridiplantae; Streptophyta; Embryophyta; Tracheophyta; Spermatophyta; Magnoliopsida; eudicotyledons; Gunneridae; Pentapetalae; rosids; malvids; Brassicales; Brassicaceae; Camelineae; Arabidopsis`DUR3_ARATH^DUR3_ARATH^Q:1604-2368,H:404-648^30.233%ID^E:6.63e-13^RecName: Full=Urea-prot…	PF00474.18^SSF^Sodium:solute symporter family^100-433^E:6.3e-13	sigP:1^21^0.862^YES	.	KEGG:ath:AT5G45380`KO:K20989	PTHR46154:SF4	GO:0016021^cellular_component^integral component of membrane`GO:0005886^cellular_component^plasma membrane`GO:0015293^molecular_function^symporter activity`GO:0015204^molecular_function^urea transmembrane transporter activity`GO:0006995^biological_process^cellular response to nitrogen starvation`GO:0071918^biological_process^urea transmembrane transport	GO:0016021^cellular_component^integral component of membrane`GO:0005886^cellular_component^plasma membrane`GO:0015293^molecular_function^symporter activity`GO:0015204^molecular_function^urea transmembrane transporter activity`GO:0006995^biological_process^cellular response to nitrogen starvation`GO:0071918^biological_process^urea transmembrane transport	GO:0022857^molecular_function^transmembrane transporter activity`GO:0055085^biological_process^transmembrane transport`GO:0016020^cellular_component^membrane	AACGACCCCTAAGCCAAGACCATACATTTGCTTCAACTAATCAATCAGTTCAGGATATATCTGAGGATACAACGCATCTATAACCATGAGTTCCAACATGGCCACCTATTTGCTCATTTTCTCGTTTTTATTAGCAGGAGTTAAGGGAGATTACGATTCAAATGTTCCAACAAAAACAAATGGATTACATACTATAGATATAGTAGAGGACGTCAAAAATACAACAAGTGGGCCTGTCGGAGTCAACCCGACCATTACACTTACCAACGCCCTTTTGCTGATAATTGGCTTTGGGATATTCTCGGTGGCTGTTGCATTCACATTCAATCTCGTCAGGAAGAAAGTCTACCACGATGACCAAAACGTGGACACTGCGTTTGACGCGGGGGGTAATGTATC…	MSSNMATYLLIFSFLLAGVKGDYDSNVPTKTNGLHTIDIVEDVKNTTSGPVGVNPTITLTNALLLIIGFGIFSVAVAFTFNLVRKKVYHDDQNVDTAFDAGGNVSIGLTATTIVSQWTWSATLLQSSTVASKYGISGPFWYGAGATIQILMFASLSIQLKTKAPGAKTFLQVIRARFGKPAHVVFCVFACLTNLVVMISLLLAGSSVMTSLVQDLSLELTCMILAAVLGSYTLIGGLGATFYVSYFNTTLIFCMVILLVIEVYYNPSGRENNPLGNVDIIYQYLNQTVGPEGNKENSYLTFLSSGGAMFGVINIIGNFGTVFCDQSYWQSSVAAKPVQGVWGFIAGGLTWFAIPFTLATTMGLSYLALGTLRGGPLLSPVDVDKGLVPPVVAQVLLGSS…	51.1474	6.43525	10973.1	8301.96	13655.5	9613.79	8692.78	7879.4	4997.88	4831.1	9815.63	3918.24	10501.4
OFUSG10277.1	528.917	8.18608	0.848902	9.37539	6.8918e-21	3.13393e-19	.	.	.	.	.	.	.	.	.	.	.	CGTATGGTCTTAACAGGGTGCTGCTCGCATATTCATACAAGTGCAGCTGGTAAAAGGCACAGAAGATGTGGGAAATAATTAACAAATTATATATAGCATCTAAAGATGTTCTAAAGGATGTTAACCGAGGTAGTGGTTTGTGGAGGTGTTGATATACTTATCAAACTAATAGCTACCTTGCATAGCTACATACATACGAACATACGTAAGTTTACGTTCAGTACAGTTGCTATTTACGTACGATTCGGAGTCGAATTTCACTCGTATATTTAAGGTGATCTAAGTTTGCTTCAAATCTACCAATTCTCCGCTCAGGTGAATATTGCTTCGTATTGTTTGCCAACATCCTGCAGGCACTGGTATGGGTCCGATATGCTAGTAAACAGATTAAAAGGAAGA…	MSANSPFTISTSSASHMVREQRYNDNESHHCYILHISFQPVYTPEGSIPLSSYKKIPRIVNGIPFGAGRTTGDQSIIKWRYIEGGKNFQTFVSLPISLEDAEDTRMRLKDRLITQSRDIFADVTVRATVMLSRCVHYDADFLLNDLADPLDETLHFHD	4.16551	4.31046	2209.47	1130.85	3000.74	2008.11	1569.14	1365.13	1469.18	873.636	172.433	198.901	249.576
OFUSG07063.1	2755.95	8.11394	0.428152	18.5333	1.11238e-76	2.40077e-73	TUBULIN ALPHA CHAIN	TBA1_PARLI^TBA1_PARLI^Q:158-1453,H:1-432^93.75%ID^E:0^RecName: Full=Tubulin alpha-1 chain;^Eukaryota; Metazoa; Echinodermata; Eleutherozoa; Echinozoa; Echinoidea; Euechinoidea; Echinacea; Echinoida; Echinidae; Paracentrotus	TBA1_PARLI^TBA1_PARLI^Q:158-1453,H:1-432^93.75%ID^E:0^RecName: Full=Tubulin alpha-1 chain;^Eukaryota; Metazoa; Echinodermata; Eleutherozoa; Echinozoa; Echinoidea; Euechinoidea; Echinacea; Echinoida; Echinidae; Paracentrotus	PF00091.26^Tubulin^Tubulin/FtsZ family, GTPase domain^3-213^E:5.2e-67`PF03953.18^Tubulin_C^Tubulin C-terminal domain^263-392^E:2e-52	.	.	.	PTHR11588:SF390	GO:0005737^cellular_component^cytoplasm`GO:0005874^cellular_component^microtubule`GO:0005525^molecular_function^GTP binding`GO:0003924^molecular_function^GTPase activity`GO:0005200^molecular_function^structural constituent of cytoskeleton`GO:0007017^biological_process^microtubule-based process	GO:0005737^cellular_component^cytoplasm`GO:0005874^cellular_component^microtubule`GO:0005525^molecular_function^GTP binding`GO:0003924^molecular_function^GTPase activity`GO:0005200^molecular_function^structural constituent of cytoskeleton`GO:0007017^biological_process^microtubule-based process	GO:0003924^molecular_function^GTPase activity	TGGGTTTTGGTATCTATGCCAAAAGTGTTGTCATCATATTTGAATATAAAACCAGTAGAAACATTTTGCAGCTGTTATAAGTGACTAGCTGCTCCATTGGAACGCAACAAGTCTTATTGAACAACTTATATTTTGGGATCACACATTCAGAAGCAAAATGAGGGAATGCATTTCAGTCCACATTGGCCAAGCGGGTGTTCAAATGGGCAATTCTTGCTGGGAGTTATACTGCCTTGAGCATGGAATCCATCCAGATGGTCAGATGCCAAGTGACAAAACCATTGGAGGCGGTGATGACTCTTTCAATACATTCTTCAGTGAGACAGGATCAGGAAAGCATGTCCCAAGAGCGGTCATGGTAGATTTAGAACCCAATGTAATAGATGAGATCCGCACTGG…	MRECISVHIGQAGVQMGNSCWELYCLEHGIHPDGQMPSDKTIGGGDDSFNTFFSETGSGKHVPRAVMVDLEPNVIDEIRTGTYRQLFHPEQLITGKEDAANNYARGHYTVGKEKIDQVLDSIRKLADRCSGLQGFLLFHSFGGGTGSGFTSLLMERLSLDYGKKSKLEFAIYPAPQISTAVVEPYNSVLTTHTTLEHSDVAFMVDNEAIYDICRRNLDIARPTYTNLNRLIGQIVSSITASLRFDGALNVDLAEFQTNLVPYPRIHFPLATYAPVISAEKAYHEQLSVSEITNACFEPQNQMVKCDPRHGKYMACCLLFRGDVVPKDVNAAIATIKTKRTIQFVDWCPTGFKVGINYQPPTVVPGGDLAKVQRAVCMLGNTTAIAEAWARLDHKFDLMY…	8.33498	9.68937	3977.76	1703.63	15759	10757.8	15619.4	12342	7415.75	4325.8	1259.23	846.225	177.768
OFUSG11655.1	1021.38	8.08604	0.857847	9.33276	1.03148e-20	4.57191e-19	GALECTIN-9	LEC1_CAEEL^LEC1_CAEEL^Q:1-771,H:35-270^23.664%ID^E:3.85e-14^RecName: Full=32 kDa beta-galactoside-binding lectin;^Eukaryota; Metazoa; Ecdysozoa; Nematoda; Chromadorea; Rhabditida; Rhabditina; Rhabditomorpha; Rhabditoidea; Rhabditidae; Peloderinae; Caenorhabditis	LEC1_CAEEL^LEC1_CAEEL^Q:1-771,H:35-270^23.664%ID^E:3.85e-14^RecName: Full=32 kDa beta-galactoside-binding lectin;^Eukaryota; Metazoa; Ecdysozoa; Nematoda; Chromadorea; Rhabditida; Rhabditina; Rhabditomorpha; Rhabditoidea; Rhabditidae; Peloderinae; Caenorhabditis	PF00337.23^Gal-bind_lectin^Galactoside-binding lectin^3-123^E:3e-14`PF00337.23^Gal-bind_lectin^Galactoside-binding lectin^130-257^E:1.2e-22	.	.	KEGG:cel:CELE_W09H1.6	PTHR11346:SF80	GO:0060102^cellular_component^collagen and cuticulin-based cuticle extracellular matrix`GO:0045121^cellular_component^membrane raft`GO:0030246^molecular_function^carbohydrate binding`GO:0016936^molecular_function^galactoside binding	GO:0060102^cellular_component^collagen and cuticulin-based cuticle extracellular matrix`GO:0045121^cellular_component^membrane raft`GO:0030246^molecular_function^carbohydrate binding`GO:0016936^molecular_function^galactoside binding	GO:0030246^molecular_function^carbohydrate binding	AACAAATGTAAATGTTTTACAGTGAACCTTCAAAGTGGTCTAGAGGGACCCCCGTTGAGCAATCTTGCTATGAAAATGAGTCCAATATTTGCCCCTGATGGCAATGGGGGTTCCATCGGATTGGACGCTGTCGTCAAAAAAGAGTGGGTCAAAAGGGAAGATAGGCGCAAGCAGCAAGCAATTGCAAAGATAGAAAGATTTCCATTCTTCAGGGGCCACCCCTTTGAAATGGAGATTGAAATTCAAAAAGAAGGATATGTGGTTTTTGTTGACGGTACCTATATCCTGGGATTCAAGCACCAGATGTCTATTGAGAAAATATCACATCTCATCTTAGATGGTGATGTAAACTTTTACAATGTACATTACCCAGATTTAAAGACACTACCCTATGTGAAA…	NKCKCFTVNLQSGLEGPPLSNLAMKMSPIFAPDGNGGSIGLDAVVKKEWVKREDRRKQQAIAKIERFPFFRGHPFEMEIEIQKEGYVVFVDGTYILGFKHQMSIEKISHLILDGDVNFYNVHYPDLKTLPYVKEIPNGLCIGEVVCIDGYIPEYAESFQFGFQTNDHYYPDTTVAFHMKVQLQGMDRKAVCNAYINNKWQVEKFVDGYLPFVRDSKLDIKVTVWKDYFMVDVNDSFFVEYKYNVVLGDVTHVAIDGD	1.03638	13.0561	3521.29	1609.44	3449.67	3617.69	3037.23	3184.15	2395.61	1546.22	2180.95	1319.71	1667.26
OFUSG18416.1	1127.16	8.05651	0.797509	10.0029	1.48068e-23	8.39261e-22	PROTEIN JAGGED-1	.	.	PF00008.28^EGF^EGF-like domain^16-47^E:8.3e-06`PF12661.8^hEGF^Human growth factor-like EGF^21-43^E:0.02`PF11218.9^DUF3011^Protein of unknown function (DUF3011)^51-123^E:4.9e-09	.	.	.	PTHR24044:SF448	.	.	.	GGTGTTTCTAGCTGCGGGTGTCAGTGGACAGCAAATAGTGATGCCTGCGCCTCTGACCCCTGCCTTGGACAAGGCTCTATTTGTATGAACACATTCGGTGGTAACTATAGATGTCTTTGCCCTCCTGGTTCTCGGGGCAAGCAGTGTGAACTTGGTGATTTTTGCTTTGTGTGCTCAAGCAGAAGATTTCGTAGAGCCGAGTGTACACCAATGGATTCTGCCCCAGCATATATACGTGATGGGACTCTCGGAGTACCAACTTTGAGCAGGCAGATATCAAAGGCAGCATGTACTTTGGATGATACCTGGGGAATGAGTTGGTCAGCCAACCGAACTATGTGGGTCGATAATGGATGCAGGGCACGATTCTGTCTTACCTTTTCGCCATAATAAGTCAAA…	GVSSCGCQWTANSDACASDPCLGQGSICMNTFGGNYRCLCPPGSRGKQCELGDFCFVCSSRRFRRAECTPMDSAPAYIRDGTLGVPTLSRQISKAACTLDDTWGMSWSANRTMWVDNGCRARFCLTFSP	40.1093	18.7169	14320.8	5492.56	5749.31	4275.62	385.834	118.736	6.08193	7.54991	2.48476	1.14161	2.89923
OFUSG01388.1	140.607	8.03629	1.05211	5.86056	4.61319e-09	5.53603e-08	METALLOENDOPEPTIDASE	.	.	PF02140.19^Gal_Lectin^Galactose binding lectin domain^57-131^E:6e-09`PF00431.21^CUB^CUB domain^146-251^E:4.7e-10	sigP:1^32^0.719^YES	.	.	PTHR45645:SF47	.	.	GO:0030246^molecular_function^carbohydrate binding	AAAACCCGGATTAAACAAGAAGTATGAAATGAGGCTATCTTCTTACATCAAAATATAATCATGGATTAGTTAAATCATTATGACATTTTGATAGGGATATCAAAAGTTAAAAACAAAATGGAGGACTATATCTCGCCATGGAGAGGGAGGTCAACACTCGAAGAAATATCATTAATATTATTTTTGCTGCATTGGTTCACTACAGTGGCTGCAAAAAATGAGACTGAATATCCAATGCAAAATGCAAGCAGTTGTTTTAACGTGAAGGGTGTCCCAATATTGCATCTCAAATGTGCCCCGAATAGTATCATCAAGGTACACGAGGCATTCCATGGCGTGCCAAGATCCAACTCTACATGTTGGTACGATGGTCTACCTAGTCAGTGCACCCAGCCTGCA…	MEDYISPWRGRSTLEEISLILFLLHWFTTVAAKNETEYPMQNASSCFNVKGVPILHLKCAPNSIIKVHEAFHGVPRSNSTCWYDGLPSQCTQPAVMDYNCNGRYTCSVPVSNPFLVNCRTYAQYMQVNYTCVPREELIDICRSSDQTLKHGFLRTPNFPHRNYSGNLDCACKLTVKEHEESIALKLLDLGINTTSLTKCNNDWLKIGEYSKRCGHIPPEDLPENIEIQSGNTLLHFHSDGWYNAKGFWVEFSAFGKEINIKCGPFRRRKTSKEISQLTTAPPTLSIRPTFKVKEVLPKINVIVDGNDVDNDQSENEEEVRDYDDEEGEEEYVIMDEDEYPSDDDDNDDYYAQGSNEDGPPRLLANVDQVQIITGCVVGGLILIAVIIIIVLVFRR	1.04124	0	338.263	192.145	562.437	416.024	399.079	581.981	430.352	523.897	138.191	123.025	83.7052
OFUSG05623.1	2593.9	8.03534	0.576894	13.7199	7.71707e-43	1.80432e-40	BETA-ELIMINATING LYASE-LIKE PROTEIN-RELATED	TNAA_HYPNA^TNAA_HYPNA^Q:85-1395,H:5-452^48.552%ID^E:8.44e-148^RecName: Full=Tryptophanase {ECO:0000255|HAMAP-Rule:MF_00544};^Bacteria; Proteobacteria; Alphaproteobacteria; Rhodobacterales; Hyphomonadaceae; Hyphomonas	TNAA_HYPNA^TNAA_HYPNA^Q:85-1395,H:5-452^48.552%ID^E:8.44e-148^RecName: Full=Tryptophanase {ECO:0000255|HAMAP-Rule:MF_00544};^Bacteria; Proteobacteria; Alphaproteobacteria; Rhodobacterales; Hyphomonadaceae; Hyphomonas	PF01212.22^Beta_elim_lyase^Beta-eliminating lyase^42-403^E:2.5e-70	.	COG3033^tryptophanase EC 4.1.99.1	KEGG:hne:HNE_0810`KO:K01668	PTHR32325	GO:0009034^molecular_function^tryptophanase activity	GO:0009034^molecular_function^tryptophanase activity	GO:0016829^molecular_function^lyase activity`GO:0006520^biological_process^cellular amino acid metabolic process	GGAACACAAAGGAGCACTACATAACAAAATTGGAGATAACCTTTGAACAAAAATATCACAGCACACAACAGCAGACGACGTAAAATGGAGCCATATCGCGTTAAAAGTGTAGAAGAAATACCATTTCTCACAGCAGAAGAACGAAAGGATGCCATCTTGAAAGCAGATTTCAACCCGTACAAAATGATGGCGTCCACTGTAACAATTGACCTGTTAACAGACTCTGGATGTTCTGCTATGAGTACAAAACAATGGTCTGCAATGATGCTAGGCGACGAGTCCTACGCTGGATCTGCCAGTTTTGAACGCTATCAGAGTGCGGTCCAAGACATAACTGGCTATAAATATGTTCTACCAACGCATCAAGGGCGGGCGTGTGAGAAAGTATTGTTCAATGCA…	MEPYRVKSVEEIPFLTAEERKDAILKADFNPYKMMASTVTIDLLTDSGCSAMSTKQWSAMMLGDESYAGSASFERYQSAVQDITGYKYVLPTHQGRACEKVLFNALVTEGSVIVNNNHYDTTKTNIALNKGIALDIAMVTDDTVDFPGNMDIDKLKEVLAEKGEQIPLVMITATNNKMRGQPVSMANIKAASSVCKAHGVPFILDGCRFAENSWFIKERENGYGDMTPREIAKEMFSYADGCMISAKKDANSNIGGVLAMNSEDLYERCVPYVIATEGHTTYGGLSGRDLEAVAVGLYEVLDESYLRYRRANLKFFEEELIRQGVPGVFPAGGHAIFLNANKLCPKIPADEFPGLTFAGLLYMESGVRCCDLGRLAFGPDAPDLIRLAVPRRVYTTEHL…	14.5849	4.30717	3910.8	1694.32	15092.2	8477.81	11513.5	12099	7524.11	8266.27	642.8	504.521	281.968
OFUSG09003.1	1457.6	8.01076	0.668064	11.9187	9.46083e-33	1.12001e-30	NONRIBOSOMAL PEPTIDE SYNTHETASE	BACC_BACLI^BACC_BACLI^Q:1054-3087,H:1443-2085^29.07%ID^E:1.12e-70^RecName: Full=Bacitracin synthase 3;^Bacteria; Firmicutes; Bacilli; Bacillales; Bacillaceae; Bacillus`BACC_BACLI^BACC_BACLI^Q:1060-3012,H:5497-6119^27.786%ID^E:1.15e-60^RecName: Full=Bacitracin synthase 3;^Bacteria; Firmicutes; Bacilli; Bacillales; Bacillaceae; Bacillus`BACC_BACLI^BACC_BACLI^Q:1135-3015,H:2973-3570^28.393%ID^E:9.78…	BACC_BACLI^BACC_BACLI^Q:1054-3087,H:1443-2085^29.07%ID^E:1.12e-70^RecName: Full=Bacitracin synthase 3;^Bacteria; Firmicutes; Bacilli; Bacillales; Bacillaceae; Bacillus`BACC_BACLI^BACC_BACLI^Q:1060-3012,H:5497-6119^27.786%ID^E:1.15e-60^RecName: Full=Bacitracin synthase 3;^Bacteria; Firmicutes; Bacilli; Bacillales; Bacillaceae; Bacillus`BACC_BACLI^BACC_BACLI^Q:1135-3015,H:2973-3570^28.393%ID^E:9.78…	PF00501.29^AMP-binding^AMP-binding enzyme^316-725^E:3.7e-73`PF13193.7^AMP-binding_C^AMP-binding enzyme C-terminal domain^733-809^E:8.7e-06`PF00550.26^PP-binding^Phosphopantetheine attachment site^847-911^E:2.6e-06	sigP:1^17^0.468^YES	.	.	PTHR45527	GO:0047689^molecular_function^aspartate racemase activity`GO:0005524^molecular_function^ATP binding`GO:0016788^molecular_function^hydrolase activity, acting on ester bonds`GO:0016874^molecular_function^ligase activity`GO:0047462^molecular_function^phenylalanine racemase (ATP-hydrolyzing) activity`GO:0031177^molecular_function^phosphopantetheine binding`GO:0017000^biological_process^antibiotic bio…	GO:0047689^molecular_function^aspartate racemase activity`GO:0005524^molecular_function^ATP binding`GO:0016788^molecular_function^hydrolase activity, acting on ester bonds`GO:0016874^molecular_function^ligase activity`GO:0047462^molecular_function^phenylalanine racemase (ATP-hydrolyzing) activity`GO:0031177^molecular_function^phosphopantetheine binding`GO:0017000^biological_process^antibiotic bio…	GO:0003824^molecular_function^catalytic activity	ctttaacatgacagcagtgcatgaaatcatcaataacgcatttgttgtgtatggttgttaaggtgatgagattgcaattgatgctttagccaaagactcattcaacttcattcaattcaggggttgtttcctaaactttgcattcccgctgcgaggcaatgcaaaggtttggaacaactcattcatggtatgattcggcaaataatgcGTCCTTCAATTAAAGTCCAATGACATCAGATTCATCAGATATTCAGATTATATGCAATCTTAAAACACATGTTTTTGTCATTTCAGTTGCTTGTAAAATTACAAATCATGGCTGACAGCGACTCGCCATTATCCAATGGCGTCCAAAGTCAACAACAGTCAAAAGGAACGCCGAGTGTTACAAACACAAAT…	MFLSFQLLVKLQIMADSDSPLSNGVQSQQQSKGTPSVTNTNGKLETTNHANGTKRLDNCTEWLNGLNKYEPTTFFRQGYYEDKEHKTNLTKSEDIKSLTFDIPAVGGEQCEYAMDTLSATKGAFIGYLSRICAKTEIHIGVEADLGSVPDDERSKYSEIIPVSFVINHMMSINSALKEYASKLNESVDVNIENGELNKRANLRKNNEEPVHNIVIGPGAKPNTALLANCKIVLFFNLEGTTFTVFWDDRRFLTEHNKNGEKISSYFGHFQSYLNNLISLGSKGDMNQIELLGTDERNAILQVPAFEAPNSLVAIFSATCARYPNSTALVSGSKQLTYSQLKEVSETIAKELEARIQSDSTRKVVIGQYLQNSIGLITSQIGIHIAGHAFLPLPVENPNE…	13.5718	21.4442	4532.6	5835.43	7302.44	9042.14	3880.14	5158.79	604.675	874.534	219.964	1493.61	180.644
OFUSG12191.1	294.876	8.00281	0.927105	8.07359	6.82619e-16	1.88878e-14	GLYCOSYLTRANSFERASE FAMILY 92 PROTEIN	.	.	PF01697.28^Glyco_transf_92^Glycosyltransferase family 92^257-459^E:6.8e-16	.	.	.	PTHR21461:SF40	.	.	.	GTTAGTCTAAGAGCGAATGCCATCTAAAACACCTCATTTCAAAACATGTTATTGAGAGTGGACAAGACAAAACGGACACTATCAAATTTTCTATCAAAGATGAAGTGGATACTACAGTATTTGAACGCATTGAGGAAATCCTCCAAACATCTTTGGAACTTTCAAGGATTTTTCATATTCGCCATGACAGCGATGATTCAGATGATTCTCGTACATGAATTACAAACGGGGACAACAAAGGAAGCTGAACTTGGCGACATTCTTTATTTTTGGAAAAAGAATCTCAATGTACCGTATTCTCTATACGCGAAATCGGTCATCTACAAGTCAGTGATACAACCCGACAGCTCAAATGTGACCATCTGTGACGGGAAATCATTTGATATACACGACACTGGA…	MLLRVDKTKRTLSNFLSKMKWILQYLNALRKSSKHLWNFQGFFIFAMTAMIQMILVHELQTGTTKEAELGDILYFWKKNLNVPYSLYAKSVIYKSVIQPDSSNVTICDGKSFDIHDTGKMTLRHIQPYQTLGDTNVHAISAFVDDRLFDAKVVRILGVGLKPGPGKRLYCQYDCKSGPVNKCNVPVNAVTLISGNHSDYLSNNERKSLMDVHLISCPIRQEDNPTDVTMATRACGYSHTLMKLHHFGFQGVVPPPYDVGVCVRPINESNYWRTDVDAQNFIMWVEYMKLLGADGIHLYTSNITEKNTKALKGYSNEKLKYLFKSEWKTVESKLERIVSDEAAMNDCIYKNMLKYKSILVTSINKWITMNGHFSNFKQMVRSDDFASKIKENGGYRITKD…	4.16892	0	1047.1	493.658	1772.17	1448.02	883.424	1017.3	415.47	630.026	60.6639	138.418	27.8839
OFUSG06008.1	219.158	7.9683	0.885626	7.63647	2.23253e-14	5.16817e-13	BETA-1,3-GALACTOSYLTRANSFERASE BRN	B3GL1_MUSSI^B3GL1_MUSSI^Q:831-1454,H:79-282^32.701%ID^E:1.19e-20^RecName: Full=UDP-GalNAc:beta-1,3-N-acetylgalactosaminyltransferase 1;^Eukaryota; Metazoa; Chordata; Craniata; Vertebrata; Euteleostomi; Mammalia; Eutheria; Euarchontoglires; Glires; Rodentia; Myomorpha; Muroidea; Muridae; Murinae; Mus; Mus	B3GL1_MUSSI^B3GL1_MUSSI^Q:831-1454,H:79-282^32.701%ID^E:1.19e-20^RecName: Full=UDP-GalNAc:beta-1,3-N-acetylgalactosaminyltransferase 1;^Eukaryota; Metazoa; Chordata; Craniata; Vertebrata; Euteleostomi; Mammalia; Eutheria; Euarchontoglires; Glires; Rodentia; Myomorpha; Muroidea; Muridae; Murinae; Mus; Mus	PF01762.22^Galactosyl_T^Galactosyltransferase^243-434^E:1.3e-29	.	.	.	PTHR11214:SF247	GO:0000139^cellular_component^Golgi membrane`GO:0016021^cellular_component^integral component of membrane`GO:0047273^molecular_function^galactosylgalactosylglucosylceramide beta-D-acetylgalactosaminyltransferase activity`GO:0008499^molecular_function^UDP-galactose:beta-N-acetylglucosamine beta-1,3-galactosyltransferase activity`GO:0009312^biological_process^oligosaccharide biosynthetic process`GO…	GO:0000139^cellular_component^Golgi membrane`GO:0016021^cellular_component^integral component of membrane`GO:0047273^molecular_function^galactosylgalactosylglucosylceramide beta-D-acetylgalactosaminyltransferase activity`GO:0008499^molecular_function^UDP-galactose:beta-N-acetylglucosamine beta-1,3-galactosyltransferase activity`GO:0009312^biological_process^oligosaccharide biosynthetic process`GO…	GO:0008378^molecular_function^galactosyltransferase activity`GO:0006486^biological_process^protein glycosylation`GO:0016020^cellular_component^membrane	CCCGAGGCTTAATGCACAGATTGCGTCCAATCATTATGCAATCAGGAATTTATCATCAAAAATTAATAAACATGATATCAATACAATTAAAAGTGGTACAACTCAGTAGTTTTAATTTCAAATAGTTAGTGTAAGTGCTTGGAAAAACAAAAACGATGAACAACAAATATATGTTGAAACTCACATTTTTAGTGATTTTATTCGTGGTTGTAATGCTTTTTGTTAATCAAAATAACACGAGCCATTATAAAAAACATGTTCTCCGTCAATACGAGGATGATACCAGCATTGGAGGTGGTCGTCCAATTAAAACTGAACTTGAAGACACGGAACTTCAATTGCTCAAATTGTTACTCAAAGCACGAGAAAGGAAATCTGGTGTAAAGCACAATCTTCATA…	MNNKYMLKLTFLVILFVVVMLFVNQNNTSHYKKHVLRQYEDDTSIGGGRPIKTELEDTELQLLKLLLKARERKSGVKHNLHKPQFQDTKQHLLKSLLQNEKIKEKEINNDPYKDKTLDVSDQGAVNMDILPSKHKVRVGLSGQTPVPTISPTTGPPKSLNDLPIKEALKCKHFTNPMPERVQRKYDSETPVEFFDLKFNNTYIDNFDYYHTADGLCKLEKGDDKKLMIVVVLSDTSEGSASFRYAIRETWGGVRRLFGWSLRFAFIMGENKDLQRMSKIATESEVYGDIVQGRFDDTYLNITDKTIASFRWTQEHCSNAIYMMRITQDTVLNPQKLIGWANEFYNHNSTDMRLYFGAPLRGSPIIYDQNHKNRIISQVKWPKDYYPAYHSGCGFLSSLT…	1.04318	1.07389	522.486	260.774	1246.12	952.554	703.42	783.081	430.843	480.036	192.294	145.588	189.042
OFUSG00478.1	1262.43	7.96696	0.510644	15.2514	1.6107e-52	6.93564e-50	.	.	.	.	sigP:1^22^0.822^YES	.	.	.	.	.	.	GGCGGATAACAAGTATTTCTATATGACTGAAAGAATCTAAACGTCCACATGCTCAGAAAGGCCAAATGCATACAGAACTATGCATGTCGAACATAATTATAATACCTGATGTTTACAAACTTTGAAGGGATAAGTTATTTTTAGGATAATTAGGACACGGTCTGCATCTTGAGAGAAAGGGTTAAGACTTTACTTTTAGAAGCATAATACTAGATATCATAAACGTGCAACATCCCTTCGTTTATAATGTCGGTGATACATTGGGCGGTTTTAGTCGTCAGTGTCTTTTGGCAACTTCACGGTGGAGAGGCCCAAGCTACTTCAACCAAACCAGTGAGCAACACAACAGAGGCACCCTATGCGATTGCGACAGCAAATGACTCTATCACGACCAGCGTT…	MSVIHWAVLVVSVFWQLHGGEAQATSTKPVSNTTEAPYAIATANDSITTSVQDMLKCKLIPTSDDIRNALADAESAKLIEYELEFENYTVNPLLEQSIRENYKANIWQKAATKHGRTLVTMNFNYDVLSLSVLSLGVEKHTVVLKDEPVGCFGELSEMDRMDNVLWLLSRDFNSESPLPTIADDDYICHQVFHTSATTSRFVDKCCSVDIDKNMACAVEFKSITLDVLLYFVLFLKIAVFLIVPYLIPCAVYMFSRGADTFRVILKSSLQKTLLVASDPGNVKFDHHWPAQALDNFDKFQEAVKIFPKGRPVKVKFSEYILSVETDRVVTENHIPVGLFACLKYRVFRCGMRKFWACVKCCNASICGVLNETFPIKWKHIGYASSGLILVTLVFPFPYW…	7.30591	6.43681	2360.71	1426.52	9054.94	5677.97	5936.43	4842.38	2010.57	1606.28	563.655	480.009	96.4435
OFUSG05836.1	2580.49	7.94428	0.585736	13.4907	1.77405e-41	3.77079e-39	RT07201P-RELATED	MLRP2_ACRMI^MLRP2_ACRMI^Q:977-1474,H:723-884^35.503%ID^E:5.54e-17^RecName: Full=MAM and LDL-receptor class A domain-containing protein 2;^Eukaryota; Metazoa; Cnidaria; Anthozoa; Hexacorallia; Scleractinia; Astrocoeniina; Acroporidae; Acropora`MLRP2_ACRMI^MLRP2_ACRMI^Q:995-1471,H:5328-5486^33.951%ID^E:1.31e-16^RecName: Full=MAM and LDL-receptor class A domain-containing protein 2;^Eukaryota; Metaz…	MLRP2_ACRMI^MLRP2_ACRMI^Q:977-1474,H:723-884^35.503%ID^E:5.54e-17^RecName: Full=MAM and LDL-receptor class A domain-containing protein 2;^Eukaryota; Metazoa; Cnidaria; Anthozoa; Hexacorallia; Scleractinia; Astrocoeniina; Acroporidae; Acropora`MLRP2_ACRMI^MLRP2_ACRMI^Q:995-1471,H:5328-5486^33.951%ID^E:1.31e-16^RecName: Full=MAM and LDL-receptor class A domain-containing protein 2;^Eukaryota; Metaz…	PF00629.24^MAM^MAM domain, meprin/A5/mu^332-487^E:2.9e-27`PF00024.27^PAN_1^PAN domain^517-589^E:9.9e-10`PF00576.22^Transthyretin^HIUase/Transthyretin family^636-740^E:5e-13	.	.	.	PTHR23282:SF101	GO:0005576^cellular_component^extracellular region`GO:0016020^cellular_component^membrane	GO:0005576^cellular_component^extracellular region`GO:0016020^cellular_component^membrane	GO:0016020^cellular_component^membrane	AACTCAGCCTTCAACCACAACAAATCCAGCAACTCAACCGCCAGTGGCTGATGACTCCGAATCAACACCAGAGATGGTTGCTGAGTTTGGCAATCCCCGTGCCAGCGGTCCAAACACTGGAATTGCCGCAAACCAGGCCTGGATACTTCAATATTCAACTCTCCTGGCGGGTAACGTGAACAGATTTGAGTTCAGATCGGCAACTAACCTAGTGGTTGACCAGGATACCCCATTGGAGGTTCGCATGCAAATATGGAGACCACTTTCCGGTCCTGGACAACGTAACATCCTTATAGGGGAAGAAAACGTTGCTGTGCGACAGCCTAACTTGCTTCACACGGTTTACCCATCCAGAGATGGAGGGATCCAGGTTCTCGAGGGCGATCTTTTAGGATTCAC…	TQPSTTTNPATQPPVADDSESTPEMVAEFGNPRASGPNTGIAANQAWILQYSTLLAGNVNRFEFRSATNLVVDQDTPLEVRMQIWRPLSGPGQRNILIGEENVAVRQPNLLHTVYPSRDGGIQVLEGDLLGFTELSQTGVIARNNDLKSPRSKTRMFDYSNDGNGEPPVLYRNYSFGHSQSQRLFSIAVFIDVYSDDSSGDGEYDVGVLGFESPNVEGNLTKPNDIDTSLGSDEILGCHLFDYKGEQKRLKIVKLGDTEVLNDVIFDSNDIAEVPQGNFTLVADKYIMNPKSGLYILNIDTSDAGRYRCLELDSETVITDYIANLAVKAFSCDFEVSSCGLNLSSHGFKWKRNKGETQTRGTGPSWDHTSGNGYYLYTDVSPPVEFNDQTQAVLNVKGH…	30.2632	12.8772	6844.96	4837.85	14016.3	9980.25	13828.2	12671.2	2083.35	4219.56	725.553	198.505	81.9888
OFUSG15587.1	24057.7	7.9311	0.636494	12.4671	1.12921e-35	1.63311e-33	LD24340P	.	.	PF01683.19^EB^EB module^146-193^E:3.1e-06	sigP:1^21^0.911^YES	.	.	PTHR39069:SF4	.	.	.	CATTTCTTAGTACTAGAATTCCGTTATTAGAGCGGTCCAGACTTTGCATTGACGACAAGAAACTAAGAGCATCCAGCTTTCTAAATCGAAGAACCAAAAAACCAAAATGCAAAAGATTATTCAATTAAGCTGCATTGTTTTGCTGTGCAGTATTGGAAGCTGTTTTGCCGTAAGCTGTACCCACACTGCAAACTGCACTGTTAATACTGGAGAGGTCTGTAATGTTCAAGGAGCTTGTACAACTGGGACATGCGAGTGCCCCACAGGAGAAGTGGTCTTTAATTCTAGCTGCATAACACCCGTGGCACATGCAGGAGCTTGTCTGACTTCGGGAGGGAGTACCAACTGTAAAACTACTGGTGCTACCTGTACCAATGGTACCTGCCAATGCACTGGAGC…	MQKIIQLSCIVLLCSIGSCFAVSCTHTANCTVNTGEVCNVQGACTTGTCECPTGEVVFNSSCITPVAHAGACLTSGGSTNCKTTGATCTNGTCQCTGAGQAYFSVSDACALSTYESQATLGGACNATKICTGTYQTCTNNTCVCSQREVNGVCKYNKVIGSACTLDADCSATAFLSVCVNSTCQCQTNYTAQKVYGFNALFPTATIQNDLGGLDMCVYTGSTSKNSGESCQVSGDGTTTLDVCSSSAPYCVMCGDQSISTNKLLGKCSTASSVSDTVGGNDGGSGGSGAEIKTASMLVAALTALMSVVMV	24.9699	56.1385	14550.8	7771.87	60718.7	37668	103485	87573.4	95529.2	88161	49266	98268.4	6268.69
OFUSG09368.2	717.789	7.88837	0.711936	10.9368	7.68502e-28	6.17818e-26	INSULIN GENE ENHANCER PROTEIN	ISL1_RAT^ISL1_RAT^Q:153-1088,H:8-313^71.609%ID^E:6.81e-158^RecName: Full=Insulin gene enhancer protein ISL-1;^Eukaryota; Metazoa; Chordata; Craniata; Vertebrata; Euteleostomi; Mammalia; Eutheria; Euarchontoglires; Glires; Rodentia; Myomorpha; Muroidea; Muridae; Murinae; Rattus	ISL1_RAT^ISL1_RAT^Q:153-1088,H:8-313^71.609%ID^E:6.81e-158^RecName: Full=Insulin gene enhancer protein ISL-1;^Eukaryota; Metazoa; Chordata; Craniata; Vertebrata; Euteleostomi; Mammalia; Eutheria; Euarchontoglires; Glires; Rodentia; Myomorpha; Muroidea; Muridae; Murinae; Rattus	PF00412.23^LIM^LIM domain^29-86^E:2.7e-14`PF00412.23^LIM^LIM domain^91-146^E:2.1e-14`PF00046.30^Homeodomain^Homeodomain^202-257^E:7.8e-16`PF05920.12^Homeobox_KN^Homeobox KN domain^222-252^E:0.00011	.	.	KEGG:rno:64444`KO:K09370	PTHR24204	GO:0005634^cellular_component^nucleus`GO:0043425^molecular_function^bHLH transcription factor binding`GO:0003682^molecular_function^chromatin binding`GO:0000987^molecular_function^cis-regulatory region sequence-specific DNA binding`GO:0003677^molecular_function^DNA binding`GO:0001228^molecular_function^DNA-binding transcription activator activity, RNA polymerase II-specific`GO:0000981^molecular_f…	GO:0005634^cellular_component^nucleus`GO:0043425^molecular_function^bHLH transcription factor binding`GO:0003682^molecular_function^chromatin binding`GO:0000987^molecular_function^cis-regulatory region sequence-specific DNA binding`GO:0003677^molecular_function^DNA binding`GO:0001228^molecular_function^DNA-binding transcription activator activity, RNA polymerase II-specific`GO:0000981^molecular_f…	GO:0003677^molecular_function^DNA binding`GO:0006355^biological_process^regulation of transcription, DNA-templated	CTAGAAGCAATGGTTTTAAGGTACAGATAGAATGAAGTAGTTATAGTACAAGCAAGGATATATTATTTGACCACCCAGAATATCTAAAAACGCATATGAGAATTAAAATTTTACCATCGACTAATAGTGACGCGATGACTGTGGAACCTCATCCGAAAAAAAAACGTCGTGTGCCAATGTGTGTGGGGTGCGGGGCGCAGATACAGGATCAGTTCATACTGAGGGTGGCCCCGGACCTAGAATGGCACGCTAGTTGCCTCAAATGCGCCGACTGTAACCAGTACCTCGACGAGAGCTGTACGTGCTTCGTAAGAGATGGCAAAACCTATTGTAAAAGAGATTACGTAAGATTATTTGGAACAAAATGTGCAAAGTGCAATCTAGGATTTAGTAAAAATG…	MRIKILPSTNSDAMTVEPHPKKKRRVPMCVGCGAQIQDQFILRVAPDLEWHASCLKCADCNQYLDESCTCFVRDGKTYCKRDYVRLFGTKCAKCNLGFSKNDFVMRARSKIYHIECFRCVACSRQLIPGDEFALRDDGLFCKADHEVLERSSGMEPEEGSPVNNNNNDPRMGTGGLQLAGHAEQITSNGRTSRSHKESKTTRVRTVLNEKQLHTLRTCYNANPRPDALMKEQLTEMTGLSPRVIRVWFQNKRCKDKKRSIHMKQMQEQQTKNGLQRPLQGVHMVASSPIRHENTIQGNPVEVQTYQPPWKALSEFAMQSDLDQPPFQQLVNSFDHGDGHPMGHDGDVYSLDDGTVLHPPSSVSSDYAGTPSELSSPISQ	6.25887	9.66565	3031.51	1562.59	1560.12	1590.77	1481.51	1512.26	1905.47	1200.04	1803.67	1279.37	2427.13
OFUSG02348.1	89.3738	7.88496	1.13566	5.46661	4.58725e-08	4.70068e-07	UNCHARACTERIZED	.	.	PF00057.19^Ldl_recept_a^Low-density lipoprotein receptor domain class A^114-147^E:5.7e-08	.	.	.	PTHR20967	.	.	GO:0005515^molecular_function^protein binding	CATATACTACACATTGGTTATAAATAATGCTAATTAACCACCATGAGTCTAAAGATTATATTTCATTTAATATGACCGCAGTATTGTCATTAGACATTATGAAAGTACACATGTGTTTCGTATTGCTTAACTTGGCAATTGCATTTGTGAAAGGCGATTATTGTGATTGCAAACTAAGTGTCGGTCAGCAGCAATCATCTTACAGTAGTTTTTCAGAAAGACTTGATTCCGAAGAGGAGCTATTAGATAGCTTAGAGAAACGCTTTAAACGACTACAAGATAATAATGCGTTCACGCTGCAGAGGTTGGGTTCGTCTAAATCTACTACAGAGAGTCTCGCAGAGACAGTTTATAAACTAGctgatacatgtcgcgaagggcatctccgctgcttggaat…	MLINHHESKDYISFNMTAVLSLDIMKVHMCFVLLNLAIAFVKGDYCDCKLSVGQQQSSYSSFSERLDSEEELLDSLEKRFKRLQDNNAFTLQRLGSSKSTTESLAETVYKLADTCREGHLRCLESGECIHALLGCDGILDCLDGSDEDPFSCINPWKPGIVTECIVPVGQTCFPDGGDVRLIGHIKKVVDSKWFPQVAKLQGEIQYFFNKTDGTQKTDAVNLYATYFTASGKFYTKWGNDEYDFKVEAETAYYYGSTRSYARIYNGANHKNLCGGCYFMPGNA	0	1.08133	285.99	237.27	485.962	575.945	409.07	233.282	72.7575	37.2756	7.97526	8.43974	41.0194
OFUSG24119.1	1012.99	7.81574	0.643557	12.0246	2.63732e-33	3.28868e-31	T-BOX TRANSCRIPTION FACTOR TBX3	TBX3_RAT^TBX3_RAT^Q:190-1035,H:14-317^62.857%ID^E:1.17e-119^RecName: Full=T-box transcription factor TBX3;^Eukaryota; Metazoa; Chordata; Craniata; Vertebrata; Euteleostomi; Mammalia; Eutheria; Euarchontoglires; Glires; Rodentia; Myomorpha; Muroidea; Muridae; Murinae; Rattus	TBX3_RAT^TBX3_RAT^Q:190-1035,H:14-317^62.857%ID^E:1.17e-119^RecName: Full=T-box transcription factor TBX3;^Eukaryota; Metazoa; Chordata; Craniata; Vertebrata; Euteleostomi; Mammalia; Eutheria; Euarchontoglires; Glires; Rodentia; Myomorpha; Muroidea; Muridae; Murinae; Rattus	PF00907.23^T-box^T-box^109-290^E:8.4e-82	.	.	KEGG:rno:353305`KO:K10177	PTHR11267:SF91	GO:0005634^cellular_component^nucleus`GO:0005667^cellular_component^transcription regulator complex`GO:0001228^molecular_function^DNA-binding transcription activator activity, RNA polymerase II-specific`GO:0003700^molecular_function^DNA-binding transcription factor activity`GO:0001227^molecular_function^DNA-binding transcription repressor activity, RNA polymerase II-specific`GO:0001102^molecular_…	GO:0005634^cellular_component^nucleus`GO:0005667^cellular_component^transcription regulator complex`GO:0001228^molecular_function^DNA-binding transcription activator activity, RNA polymerase II-specific`GO:0003700^molecular_function^DNA-binding transcription factor activity`GO:0001227^molecular_function^DNA-binding transcription repressor activity, RNA polymerase II-specific`GO:0001102^molecular_…	GO:0003700^molecular_function^DNA-binding transcription factor activity`GO:0006355^biological_process^regulation of transcription, DNA-templated`GO:0005634^cellular_component^nucleus	AAGCTTTATCATCGACTGATCGTCCGTAGTGTCTACTCGCTTCTCCTCTTGTTCAGGCTGCTGAATCTTGAAACGCACCAAAATTGAGCATCTTTATAAAGGACTGTGCATTAAGGAGACCAAGGACTAATGATATACGATCAAACCGGGCGTAGCGAGCCCACGGAGTACGAGAGAACCGCAGCAGCTACTATGGCTTTTTCGCCGTTCCTTATGAGGCCCTCTACGGACTACAGCATGAGTGCAATTTTGGGGCAAGTGAGTCAAGTTGGGCAGAACCCGTACCAAGTACCGGGTATGCCGCATGGTATACACCCTAGTATCTTGCCTAAATTACAGCAAACGGTTGCTAGGACTCCTCTTACGCCCGCAGATATCATAGCCCATCAACACATGGCA…	MIYDQTGRSEPTEYERTAAATMAFSPFLMRPSTDYSMSAILGQVSQVGQNPYQVPGMPHGIHPSILPKLQQTVARTPLTPADIIAHQHMARGYPRPLEPEPDVQDDPKVELDNKELWEQFHKHSTEMVITKSGRRMFPAYKVKLSGLDKKAKYILLMDLVAVDDCRYKFHNSRWMVAGKADPEMPKRMYIHPDSPSSGEQWMSKLVSFHKLKLTNNISDKHGFQTILNSMHKYQPRFHLVRANDILKLPYSQFRTYVFKETSFIAVTAYQNEKVTQLKIDYNPFAKGFRDTGTGKREKKRLILGPSSNAQSVASSDGKSGPSMSPGCSDYHDNSNHDDHSDIHDSENDNSDDEEDMEICVDDRPEESNPPEVMSTPINVPQITPHITPPIKDENESSEK…	15.6585	7.50665	3226.76	2898.56	3311.68	3047.94	1639.43	2583.64	1614.95	1769.08	2553.13	2319.47	2341.14
OFUSG04268.1	581.189	7.7943	0.972942	7.6846	1.53479e-14	3.62776e-13	FAILED AXON CONNECTIONS	FAXC_DROME^FAXC_DROME^Q:139-924,H:94-354^36.397%ID^E:3.85e-40^RecName: Full=Failed axon connections;^Eukaryota; Metazoa; Ecdysozoa; Arthropoda; Hexapoda; Insecta; Pterygota; Neoptera; Holometabola; Diptera; Brachycera; Muscomorpha; Ephydroidea; Drosophilidae; Drosophila; Sophophora	FAXC_DROME^FAXC_DROME^Q:139-924,H:94-354^36.397%ID^E:3.85e-40^RecName: Full=Failed axon connections;^Eukaryota; Metazoa; Ecdysozoa; Arthropoda; Hexapoda; Insecta; Pterygota; Neoptera; Holometabola; Diptera; Brachycera; Muscomorpha; Ephydroidea; Drosophilidae; Drosophila; Sophophora	PF17172.5^GST_N_4^Glutathione S-transferase N-terminal domain^23-119^E:9.6e-26`PF10568.10^Tom37^Outer mitochondrial membrane transport complex protein^26-118^E:1.5e-08`PF13410.7^GST_C_2^Glutathione S-transferase, C-terminal domain^172-234^E:6.7e-06`PF17171.5^GST_C_6^Glutathione S-transferase, C-terminal domain^178-241^E:5e-19	.	.	KEGG:dme:Dmel_CG4609	PTHR12289:SF71	GO:0005737^cellular_component^cytoplasm`GO:0005886^cellular_component^plasma membrane`GO:0007409^biological_process^axonogenesis`GO:0036099^biological_process^female germ-line stem cell population maintenance	GO:0005737^cellular_component^cytoplasm`GO:0005886^cellular_component^plasma membrane`GO:0007409^biological_process^axonogenesis`GO:0036099^biological_process^female germ-line stem cell population maintenance	GO:0001401^cellular_component^SAM complex	GTTACATAACGTTGATAATCATTAACATTTGATATTAATAATCTACTATAAGACTATATAGTTCAGAATGATTATTGGCTTTTTGATAAGGAGAACATATATTGTATAGGGCTTCACATCTTTATACATACAAGCTGGTTTGGAATATAAAGAGAAAATTACAAGATGGAAAGCAAGGACACTGTAAAACTGACCACATTCCACAGGTCGAAGCATATCTGTAGCATTTCTCCATTTGGACTGAAGCTTGAGACTTGGATGAGGTTAGCTAAAATACCATATGAGACAGAATATGCATGGAGTCCGGGGGCCAACAAGCAGACTGGTCAGATCCCATTCATCACTTTCAATGGAGAACAAGTAGATGATTCTAATAACATCATCAGATATTTAAGCAAA…	MESKDTVKLTTFHRSKHICSISPFGLKLETWMRLAKIPYETEYAWSPGANKQTGQIPFITFNGEQVDDSNNIIRYLSKQFAVNTDEDLTSEQSLISHTFQRMLDEHTSWSIFYYRYVDDPLTFVSSPDIFPSLKAPHFANNPNKETVLSEAMKKMFDTRAKAQGIGRKPKEEIYRIGMEDIRVLSEYLGDKKYMFGDKPTKLDCGMFGLLSQVVYVPIPSYPHKIMIEEECRNLIDHTNRIKELLWPDWDSLCDTNSNSNDTK	0	5.39688	1422.18	684.27	1987.83	1279.9	2938.05	2033.36	2571.69	1660.25	399.663	498.355	184.248
OFUSG18960.1	155.863	7.79382	0.505485	15.0035	6.96915e-51	2.64234e-48	UREA ACTIVE TRANSPORTER	DUR3_ARATH^DUR3_ARATH^Q:347-1486,H:37-421^45.113%ID^E:4e-77^RecName: Full=Urea-proton symporter DUR3;^Eukaryota; Viridiplantae; Streptophyta; Embryophyta; Tracheophyta; Spermatophyta; Magnoliopsida; eudicotyledons; Gunneridae; Pentapetalae; rosids; malvids; Brassicales; Brassicaceae; Camelineae; Arabidopsis`DUR3_ARATH^DUR3_ARATH^Q:1751-2527,H:411-655^30.189%ID^E:2.64e-14^RecName: Full=Urea-proton…	DUR3_ARATH^DUR3_ARATH^Q:347-1486,H:37-421^45.113%ID^E:4e-77^RecName: Full=Urea-proton symporter DUR3;^Eukaryota; Viridiplantae; Streptophyta; Embryophyta; Tracheophyta; Spermatophyta; Magnoliopsida; eudicotyledons; Gunneridae; Pentapetalae; rosids; malvids; Brassicales; Brassicaceae; Camelineae; Arabidopsis`DUR3_ARATH^DUR3_ARATH^Q:1751-2527,H:411-655^30.189%ID^E:2.64e-14^RecName: Full=Urea-proton…	PF00474.18^SSF^Sodium:solute symporter family^85-418^E:1.5e-12	sigP:1^17^0.875^YES	.	KEGG:ath:AT5G45380`KO:K20989	PTHR46154:SF4	GO:0016021^cellular_component^integral component of membrane`GO:0005886^cellular_component^plasma membrane`GO:0015293^molecular_function^symporter activity`GO:0015204^molecular_function^urea transmembrane transporter activity`GO:0006995^biological_process^cellular response to nitrogen starvation`GO:0071918^biological_process^urea transmembrane transport	GO:0016021^cellular_component^integral component of membrane`GO:0005886^cellular_component^plasma membrane`GO:0015293^molecular_function^symporter activity`GO:0015204^molecular_function^urea transmembrane transporter activity`GO:0006995^biological_process^cellular response to nitrogen starvation`GO:0071918^biological_process^urea transmembrane transport	GO:0022857^molecular_function^transmembrane transporter activity`GO:0055085^biological_process^transmembrane transport`GO:0016020^cellular_component^membrane	TACATTGTCAAACAGTCTCCGAACACCTTCTGAATTTTCAAAAAATTGTTCTGATATTCTATCACTGAGCGTATTTACCTTTAGGATATTAAGAGAGAATATGTGTTAGTCTTGAGTGGATATATAGAACCGAACAGCCACTCAGTGGTTAAAGAGGTGTATCGCATTTCATTTCATTATACACATTTTATTGTGTCCTAAAGATCACGATACAGCTATGAATCTTCTATTGTTTCTGTTTCTATGTGCCCTTAAAGGAATATATGGACAGGGGAGTACAACAGAAGATCCGTTGACCACCGTAGGGGCAAACATAACGAGCTTAGGCGTCAGGCCCTCAATAAAGCTTGGATATGCTCTGCTGCTCATCCTCGGCTTTGGCGTGTTCTCTGTGGTTGT…	MNLLLFLFLCALKGIYGQGSTTEDPLTTVGANITSLGVRPSIKLGYALLLILGFGVFSVVVAIAFNLVRKKVYHDSDNVDTAFDAGGNVSIGLTATTIVSQWTWSATLLQSSTVASKYGISGPFWYGAGATIQILMFATLSIQLKTKAPGAKTFLQVIRARFGKNAHIVFCVFACVTNLVVMVSLLLAGTSVMTSLVEGLSLELACLIMAAVIGSYTLIGGLGATFYVSYFNTSLIFAMIMLLVIEVYYNPSGRESNPLGSANVIYSYLNQTKGPDGNTENSYLTFLSSGGALFGVINIIGNFGTVFCDQSYWQSSVAAKPVQGVWGFIAGGLTWFAIPFTLATTMGLSYLALGTLRGAPLLSPADVDKGLVPPVVAQVLLQESGEYVLLLLILMAVMS…	6.26088	4.29305	1241.44	1204.56	343.965	320.683	134.94	148.906	174.388	187.284	148.036	137.326	154.922
OFUSG18408.1	133.369	7.79326	1.1531	6.4667	1.00169e-10	1.50371e-09	NOTCH LIGAND FAMILY MEMBER	FAT_DROME^FAT_DROME^Q:1-345,H:4045-4139^32.203%ID^E:6.7e-08^RecName: Full=Cadherin-related tumor suppressor;^Eukaryota; Metazoa; Ecdysozoa; Arthropoda; Hexapoda; Insecta; Pterygota; Neoptera; Holometabola; Diptera; Brachycera; Muscomorpha; Ephydroidea; Drosophilidae; Drosophila; Sophophora`FAT_DROME^FAT_DROME^Q:106-312,H:4035-4090^33.333%ID^E:3.89e-06^RecName: Full=Cadherin-related tumor suppress…	FAT_DROME^FAT_DROME^Q:1-345,H:4045-4139^32.203%ID^E:6.7e-08^RecName: Full=Cadherin-related tumor suppressor;^Eukaryota; Metazoa; Ecdysozoa; Arthropoda; Hexapoda; Insecta; Pterygota; Neoptera; Holometabola; Diptera; Brachycera; Muscomorpha; Ephydroidea; Drosophilidae; Drosophila; Sophophora`FAT_DROME^FAT_DROME^Q:106-312,H:4035-4090^33.333%ID^E:3.89e-06^RecName: Full=Cadherin-related tumor suppress…	PF00008.28^EGF^EGF-like domain^70-102^E:5.1e-06	.	.	KEGG:dme:Dmel_CG3352`KO:K16669	PTHR24044	GO:0016324^cellular_component^apical plasma membrane`GO:0016327^cellular_component^apicolateral plasma membrane`GO:0005887^cellular_component^integral component of plasma membrane`GO:0005739^cellular_component^mitochondrion`GO:0005886^cellular_component^plasma membrane`GO:0045296^molecular_function^cadherin binding`GO:0005509^molecular_function^calcium ion binding`GO:0017022^molecular_function^my…	GO:0016324^cellular_component^apical plasma membrane`GO:0016327^cellular_component^apicolateral plasma membrane`GO:0005887^cellular_component^integral component of plasma membrane`GO:0005739^cellular_component^mitochondrion`GO:0005886^cellular_component^plasma membrane`GO:0045296^molecular_function^cadherin binding`GO:0005509^molecular_function^calcium ion binding`GO:0017022^molecular_function^my…	.	GGAAGCGAATGCAATCCAAGTGATCTGACAGGCACAAAGTCATGTAATGACGGAGACTGCCCTGAAACTTGCAATGAAGGAATAGCTATTCCTTGGAATAATGGACTTAGCTGCATATGCCCTCCACACAAGCAAGGACCACAGTGTGCTGAAGATGTCGTTGGTGTTTCCAGCTGCGGATGTCAGTGGACAGTAAATAGTGATGCCTGCGCCTCTGACCCTTGCCTTGGACAAGGTTCAATTTGCATGAACACATTCGGTGATAACTATAGATGTCTCTGCCCACCTGGTTCGTCTGGTGAACGGTGTGAACAAGGTACATTTTGCTTCCAGTGCTCAAGCTATAGATATGCTAAAAGGACATGTGAACCAATGGCTCGTGCCCCTGCCTACATACGT…	GSECNPSDLTGTKSCNDGDCPETCNEGIAIPWNNGLSCICPPHKQGPQCAEDVVGVSSCGCQWTVNSDACASDPCLGQGSICMNTFGDNYRCLCPPGSSGERCEQGTFCFQCSSYRYAKRTCEPMARAPAYIRDATLRLPVLNKQISRRKCTSDLWGTDQWSSRKLWVNGGCRAKFCVTYFKFDKDSARRGTSAKIN	5.16109	1.09643	1431.58	679.38	689.933	600.493	27.1952	31.5001	0	1.89273	87.5982	22.873	22.2708
OFUSG09762.1	3144.08	7.76681	1.01447	7.0488	1.80473e-12	3.44224e-11	VERY LARGE A-KINASE ANCHOR PROTEIN	.	.	PF14200.7^RicinB_lectin_2^Ricin-type beta-trefoil lectin domain-like^20-92^E:1.6e-13`PF00652.23^Ricin_B_lectin^Ricin-type beta-trefoil lectin domain^22-147^E:6.2e-16`PF14200.7^RicinB_lectin_2^Ricin-type beta-trefoil lectin domain-like^99-150^E:1.7e-06	.	.	.	PTHR11818:SF38	.	.	.	atgttggatatcattgaacaaagggaacgacagtatggTAACAAAAGAAAGATGGCTGGCCAGTGGTTCATGATTCGCAACAAGATGAATGGCCTTGTCTTGGACATTGAGAGCAACAATACAGAACCAGGTGCTTCTATCGTCATGTGGACACCAAACTGCAGTGATAACCAGCTTTGGACCGTTGAAAATAACCACATCATCAGCAAGCTGAGTGGAATGGCCATAGACATTGAAGGAGGCAACCCCACTCAAGGGACGAGGATTGTCACATGGCATCAGGAAGACAAGGAATGGCAAAAATGGAGCTTCGAGGGAAGTGGAGCACTCGTTAGTCAGTTAGGTGGCGGAACACTTTGCCTTGATGTAATTGACCAGCAAATGGAACCAGGATGCAAA…	MLDIIEQRERQYGNKRKMAGQWFMIRNKMNGLVLDIESNNTEPGASIVMWTPNCSDNQLWTVENNHIISKLSGMAIDIEGGNPTQGTRIVTWHQEDKEWQKWSFEGSGALVSQLGGGTLCLDVIDQQMEPGCKVGIWNHNGGENQQWELVLAPGCF	0	3.25728	721.401	508.68	3910.65	2693.19	10668.3	9071.5	13590	13434.7	8808.12	9842.8	11581.9
OFUSG00604.1	5888.4	7.75079	0.839568	8.91338	4.9501e-19	1.87429e-17	SUBFAMILY NOT NAMED	CNR11_MAIZE^CNR11_MAIZE^Q:48-353,H:31-137^28.037%ID^E:2.26e-08^RecName: Full=Cell number regulator 11;^Eukaryota; Viridiplantae; Streptophyta; Embryophyta; Tracheophyta; Spermatophyta; Magnoliopsida; Liliopsida; Poales; Poaceae; PACMAD clade; Panicoideae; Andropogonodae; Andropogoneae; Tripsacinae; Zea	CNR11_MAIZE^CNR11_MAIZE^Q:48-353,H:31-137^28.037%ID^E:2.26e-08^RecName: Full=Cell number regulator 11;^Eukaryota; Viridiplantae; Streptophyta; Embryophyta; Tracheophyta; Spermatophyta; Magnoliopsida; Liliopsida; Poales; Poaceae; PACMAD clade; Panicoideae; Andropogonodae; Andropogoneae; Tripsacinae; Zea	PF04749.18^PLAC8^PLAC8 family^26-115^E:7.8e-15	.	.	.	PTHR15907:SF90	GO:0016021^cellular_component^integral component of membrane	GO:0016021^cellular_component^integral component of membrane	.	GTAACTGTAGCGGGAATATAAAAAACAGCAATATGGGCCGACCAATGCCAGGAGCAAAGGAGATAATGGAACCAGCTTTCCAACAGGGGATACTTGGCTGTTTCGGGAATATGGGCGTATGCGTCATCTCATTCTTCCTTCCCTGTATCCAGGCAGGGAGGAACGCAGAGGCGGTTGGGGACAATTTCATCCTAACTTGCGTCGGGATTTTCATTCCACTCGTAAATTTGTACTTTCTCTCTGAGAACAGAGCTAAGATTCGACATATGCAAAGCATCCGAGGAGACACTGCTTCAGACTGTGCTTATATTATTGTATGCGGACCCTGTTCGTTATCCCAGCTTGCTGCTGAATGTGACTATATAAGGAATAACCCAAAACCAATCGCGGTCGAAAGGG…	NCSGNIKNSNMGRPMPGAKEIMEPAFQQGILGCFGNMGVCVISFFLPCIQAGRNAEAVGDNFILTCVGIFIPLVNLYFLSENRAKIRHMQSIRGDTASDCAYIIVCGPCSLSQLAAECDYIRNNPKPIAVERE	1.03097	6.58684	2714.58	362.554	19305.7	7551.98	38495.4	21183.1	24788.5	14512.6	14943.1	13459.2	1617.14
OFUSG26927.1	1291.09	7.7204	1.1648	6.56462	5.2166e-11	8.19038e-10	.	.	.	.	.	.	.	.	.	.	.	ATATTATTGATAAGGCAATAGACGCCGTATCTGAAAATAATAAACCGGACACATCAGAGGAAAGCTTACATTCCATAAAAACGCACTCTCTACCAACACTTTCAAAATCAGGTGAAACTAAGTCTGACTCGTCATCGATATCCCCATCGAAAAGTGGACTCAACAAAAAAACTAAACCGAAGAACAAGCCGATGGGAAATACGAAACAAACAGAGTCTCCATATGGAAATTTAAAACCTCCGCCAGTAAGGGGCAAACCTGAAAAGAAAAAGACTCAGCCGAAAGATGGCACCAGTGCCGCACTTGACAGCGTTCCAAAGAAAACATCGCTCCCTCCAGTGCAACAGCGGGTACAAGAACAAAAGATAAGAAGTCGACCTAGTAGTTACAAATCCGACG…	IIDKAIDAVSENNKPDTSEESLHSIKTHSLPTLSKSGETKSDSSSISPSKSGLNKKTKPKNKPMGNTKQTESPYGNLKPPPVRGKPEKKKTQPKDGTSAALDSVPKKTSLPPVQQRVQEQKIRSRPSSYKSDVSITSSVTSSKLANEAVASALKYGMNALGKSGQKSREGSASRRKTSAQLKPKPNGLLKATPNSIHSSRSSLTEVTSRASSPRGADDDSDVASDSSDVDAVPVNAENTNNTIGRSTIDVHESERSEKVNNNATPSLTSRTGSEMSVTSSVLANNAVSAALKFGIDQLASNNEGPFQEEESEPVEKGTNEVEDHESINVNDESKRTDNNATPSLTSRTGSAISVTSSVLANKAVSAALKHGLEQLNTITKQDSLQEEERERTRENDVQE…	2.08639	5.36929	1566.15	1306.99	4055.96	3276.78	4009.3	3436.93	3775.73	2726.65	4847.21	5352.87	444.588
OFUSG17865.1	770.351	7.71032	0.66516	11.3685	6.00226e-30	5.67021e-28	NETRIN-A-RELATED	NET1_MOUSE^NET1_MOUSE^Q:473-2203,H:25-601^63.993%ID^E:0^RecName: Full=Netrin-1;^Eukaryota; Metazoa; Chordata; Craniata; Vertebrata; Euteleostomi; Mammalia; Eutheria; Euarchontoglires; Glires; Rodentia; Myomorpha; Muroidea; Muridae; Murinae; Mus; Mus	NET1_MOUSE^NET1_MOUSE^Q:473-2203,H:25-601^63.993%ID^E:0^RecName: Full=Netrin-1;^Eukaryota; Metazoa; Chordata; Craniata; Vertebrata; Euteleostomi; Mammalia; Eutheria; Euarchontoglires; Glires; Rodentia; Myomorpha; Muroidea; Muridae; Murinae; Mus; Mus	PF00055.18^Laminin_N^Laminin N-terminal (Domain VI)^55-289^E:2.6e-83`PF00053.25^Laminin_EGF^Laminin EGF domain^291-340^E:3.2e-08`PF00053.25^Laminin_EGF^Laminin EGF domain^348-408^E:6.1e-08`PF00053.25^Laminin_EGF^Laminin EGF domain^411-454^E:6.6e-10`PF01759.22^NTR^UNC-6/NTR/C345C module^489-598^E:4.6e-28	.	.	KEGG:mmu:18208`KO:K06843	PTHR10574:SF365	GO:0005604^cellular_component^basement membrane`GO:0071944^cellular_component^cell periphery`GO:0062023^cellular_component^collagen-containing extracellular matrix`GO:0005737^cellular_component^cytoplasm`GO:0031012^cellular_component^extracellular matrix`GO:0005576^cellular_component^extracellular region`GO:0005125^molecular_function^cytokine activity`GO:0009887^biological_process^animal organ mo…	GO:0005604^cellular_component^basement membrane`GO:0071944^cellular_component^cell periphery`GO:0062023^cellular_component^collagen-containing extracellular matrix`GO:0005737^cellular_component^cytoplasm`GO:0031012^cellular_component^extracellular matrix`GO:0005576^cellular_component^extracellular region`GO:0005125^molecular_function^cytokine activity`GO:0009887^biological_process^animal organ mo…	.	GGTAAATGAGAAGGCAAAATAGTTCGTAAGTTACAGCTTAGCTTCAGGCATATTGGTTACTAACTTAACACATGTGAAACAACATCGAATAGGACAGCAATTAGTAGGAGCTGTAAACCCCGGCAAGATAACAGAGCAGACTCTCAGAGGCGAGCACAATTAACACGATGTAAAGATAAAGAAAAATAATTTAAAGAACACGAATTTGGGATACTTAAATTAGTAGGATATAAACTATAACTTATTCTGGATTAAAATTGAAGACGCGAATGGACAGATAAGTAAAGTTCTGTATTTGACTCAATCAATACATTTACTCGGTGTTAATGAGGGGTTAATAATTAAAAACGTCTGGTAAAATATATAGGCCTATACAGACACTGCCGATATGGGTCAAAG…	MGQRKWNMPFLTIILTYCICVISIDGFESPFLNAFSSQQSPPDPCYDEIGEPRRCTPDFENAAFTKEVVASSTCGSPPSRYCKLKATNDKGGDVVRSCYVCDANHPKRRHPPSYLTDLNNPSNLTCWMSEPFTASPENVTLKLSLGKKYELTYVSLQFCSARPDSMAIYKSIDYGKTWIPFQFYSSNCKKMYHRNPQGKITKANEQEALCTDSYSNIDPHSQGRVAYSTLEGRPSASEFDNSPVLQDWVTATDVMIVFNRLHTDENSADKSKEVLDSYYYALSDFAVGGRCRCNGHASRCIKNDRDNRLVCDCKHNTAGYDCERCKPFHFDRPWARATLREANECIACNCNLHARKCRFNMELFKLSGRESGGVCVNCRHNTAGRMCHYCKDGFFRDPA…	11.4824	2.14496	1128.09	2550.39	1710.59	2956.94	841.169	1937	898.983	1400.95	2238.27	2466.34	2615.62
OFUSG12872.1	106.665	7.7068	1.13186	5.5246	3.30243e-08	3.4612e-07	.	.	.	.	.	.	.	.	.	.	.	CGTAATTTAATACAGTCGCCTCTACGATACTACAAAACGTACATGTAAGAGGATACATACAACTATACTTTATGACATTGAAAATAGTTGAGTTGTTACAGAACAAAATTAAAGAATCAAAACTAGCATGTCATATAATGTGAGAAATAAATTAGCAACGGACGCTAAACATCATCAACAGGATATCGTTATTAGTTCAGCAATGCTATCAGACATGAATCTTATCTCCCCTGCTCCATCGAGAGGCAGGGGCAGCACCGGAGACATGTTTCCGCATAATCAACAACATCGGACTAGAGGTTCACAAGCTTATGAACGTTCAAGTGATACCGACACTTCAAACGCGTATGGGCACAACGTTCCACTTCCAAGAAGGAGACCAAACAGAAAGAGGTACAA…	MSYNVRNKLATDAKHHQQDIVISSAMLSDMNLISPAPSRGRGSTGDMFPHNQQHRTRGSQAYERSSDTDTSNAYGHNVPLPRRRPNRKRYKLKSDNETERIEPSFESPEYNHSNSKLGKMKGIHDNEKRKHTGSSSGETVSLPMFDALSVVTQPYIDKVLKWDDNPKNAESQMDKFLPASSAMKSLNCYNFDYGLYKNSKHKKVKGEEDEISIPKASTEDFADFDNGPSIHSKYFPKRRSNNRLMKANKGSSKDGTSDADFAYRGKANTKQLHGANSLPLLAYHPEKSDFLPSVKPCSMHSKDTLTDRDFLLWRSTHHGGSSHRSENLMATTPRPHRENDASPYPEPTRPINEVMNDGLKLNGKIRFAPKLPSAKLVGQRLVQNWLKS	0	1.07784	334.617	152.46	497.566	391.676	306.855	247.64	88.0795	156.122	394.839	144.808	156.242
OFUSG02409.1	1595.51	7.70679	1.00968	7.31992	2.48125e-13	5.20691e-12	CTX-RELATED TYPE I TRANSMEMBRANE PROTEIN	.	.	.	sigP:1^19^0.887^YES	.	.	PTHR12231	.	.	.	TTGAGAGGAGGTGTGAGTGTTCTCTATGTACTGTATGCAGATTATGAAAGGTGATCTCTGGGTTGAATACATACATACGTACCTGAGAACATACCTGTTTAACATACAGGTAGACAGCGCAGAAACTCGTTAACAACACATAAAATACAGAAACATTGACTTCGTTACCATGGATACGAGGCTGTTACTAGGGGTGCTGGTTGCCCTACTGGGGACAGCCCTGGCAAACCCATCTTGGAGCGTCACTGTAGAATATGGCAAAAATGTCATCCTCTCTTGCAACGACACAAGCGCACCTCCTACCACTGATGTAGTACGCAATAGATGGATGCTTCCCGATTTAAGAATTGTAGATAAAGGATGGACGGATGACGATGGACGAAGGGGAGTGATTGATGA…	MDTRLLLGVLVALLGTALANPSWSVTVEYGKNVILSCNDTSAPPTTDVVRNRWMLPDLRIVDKGWTDDDGRRGVIDDGKRFNITMLSDRDFGIYHCMFEKTDGTYFVVKRGVNVGGPYYGNLWDKYRMSVIIGGSAAGGFAAVMILICLVYKFRWRPPVEEDQYKSPPTNGQIDGYGVAHVPSDTKDDIERIPMAQYHTGNEKNGDAPVPAQTETAQLTNEVKVKDNSSYVYDNPAMKITDPDKLTQL	3.12822	2.14961	847.331	888.947	1346.79	1491.34	1958.42	3001.88	6560.34	5354.28	6245.87	7316.73	8038.46
OFUSG25887.2	4586.88	7.69305	0.814405	7.7695	7.87982e-15	1.92582e-13	.	.	.	.	sigP:1^25^0.858^YES	.	.	.	.	.	.	ctttgatcggttgctcataatgacaGCGTGCGTATAGCCGCCAAAAAGCAACATGGTGCATAATTGCGCGCTTGTCAAATAAAAACCGGTTCAAACAGGATACCCACTTAATATCCATCTGAAAACGACTTCGGTGTATTCATTCTGGATTCAAGACGAAACAAGCAAGATGCAGTTTAGATTCAGTTCCGTACTTTTTCTTGGACTGGTAGCAGTCCTCCTTTGCAGCCAATTTACTGATGCATACAGGGATTTACCATCCGAATCAGATATAATTGAATCATTATTGGCTAGACTCTTGGAAAGCGAGAAAAGAGATTTGCCGCCTGTCCCGAAAGTAGAAGAAGATTCAACTTTGTTGGAAATACTTACCGATTTGAATAAAAGGGGGGAATGCGA…	MQFRFSSVLFLGLVAVLLCSQFTDAYRDLPSESDIIESLLARLLESEKRDLPPVPKVEEDSTLLEILTDLNKRGECEDACSDPDTMDPMYGGSEGECMADCKKKK	2.07355	0	278.73	392.618	4783.03	4092.51	19303.8	16488.3	29571.5	21764.3	14322.3	12544.6	286.301
OFUSG13670.1	1912.78	7.68741	0.60013	12.3367	5.74332e-35	7.82234e-33	PROTEIN-GLUCOSYLGALACTOSYLHYDROXYLYSINE GLUCOSIDASE	PGGHG_CHICK^PGGHG_CHICK^Q:250-2286,H:2-648^30.6%ID^E:1.8e-97^RecName: Full=Protein-glucosylgalactosylhydroxylysine glucosidase {ECO:0000303|PubMed:26682924};^Eukaryota; Metazoa; Chordata; Craniata; Vertebrata; Euteleostomi; Archelosauria; Archosauria; Dinosauria; Saurischia; Theropoda; Coelurosauria; Aves; Neognathae; Galloanserae; Galliformes; Phasianidae; Phasianinae; Gallus	PGGHG_CHICK^PGGHG_CHICK^Q:250-2286,H:2-648^30.6%ID^E:1.8e-97^RecName: Full=Protein-glucosylgalactosylhydroxylysine glucosidase {ECO:0000303|PubMed:26682924};^Eukaryota; Metazoa; Chordata; Craniata; Vertebrata; Euteleostomi; Archelosauria; Archosauria; Dinosauria; Saurischia; Theropoda; Coelurosauria; Aves; Neognathae; Galloanserae; Galliformes; Phasianidae; Phasianinae; Gallus	PF03632.16^Glyco_hydro_65m^Glycosyl hydrolase family 65 central catalytic domain^281-490^E:7.7e-46	.	.	KEGG:gga:422991`KO:K22078	PTHR11051:SF8	GO:0005829^cellular_component^cytosol`GO:0004553^molecular_function^hydrolase activity, hydrolyzing O-glycosyl compounds`GO:0047402^molecular_function^protein-glucosylgalactosylhydroxylysine glucosidase activity`GO:0005975^biological_process^carbohydrate metabolic process	GO:0005829^cellular_component^cytosol`GO:0004553^molecular_function^hydrolase activity, hydrolyzing O-glycosyl compounds`GO:0047402^molecular_function^protein-glucosylgalactosylhydroxylysine glucosidase activity`GO:0005975^biological_process^carbohydrate metabolic process	GO:0003824^molecular_function^catalytic activity`GO:0005975^biological_process^carbohydrate metabolic process	GGTTTCTACACAGTGGTACATAGGCGTCCGTCCAAAGGTCTCTATAGAACATAACGGATAGTTATTTCAGCTAATATTATACCTGTGTATTTGATTTGGAATCAACCGGGAACTAACTTACATGCGAGTCTATCAGAAAAATCACCATGAAGCTATATAGCTATAATAACGTTGTTGCCTCTAGTGGCGGTGTACTGCATTCCATCACTTACAGACTTTGAAGACGTTGAAGAATTGTTGGGTCATAGGTCGAAGAGACAAAGTGGAATCAGTGACGACAATAACAGAGATCCTCATCTCATAGATACAAGAAGTCTGCCATACAGACGTGATGACCGATGGACACTAGACTACAGGTACATGCCCGTGGTGGGCAATGGCCACATGGCAATGTCGGTG…	MPVVGNGHMAMSVYNDSIFLDGVYNGRGEFSRRARIPAEAALRVNFSSSVTNIQRRFRFNLDTGVFEENITLPHCDIVHRTYCHKYYTRVFIQEIIMTPRTGQIQQCKLQLDHLRDNYTDDFEIFKKEPFNNADWTRRLRTHVAEGDGASPRDVYMFFDDIPRDLSLPRNAQNPQRNVFVMTLDTDRSRAERAYTEVQRVLSTTNGYNELYKDHLDAWRILWQYARIEIEGNVRLAKVTKAALYYMMSSLPPLVRETGGPQDTYQPANPFMGLARSGLGAGCNTTDYNGHVFWDHEMFMMPPMTILYPSIGKEMLMYRMNRRSAAKERASQTGNQGERFPWESAITGREITTSYAKFQQEYAHHITGAVGWAARNYYSATRDQEFMDSNGGCDFSKEIA…	4.17402	5.36606	1013.54	1267.12	3382.64	3517.98	4140.2	9147.78	6218.68	8090.89	3516.79	5162.2	6118.3
OFUSG18412.1	389.483	7.64784	0.733219	10.3475	4.29451e-25	2.82843e-23	THROMBOSPONDIN-1	HMCN1_HUMAN^HMCN1_HUMAN^Q:18-572,H:4535-4716^48.649%ID^E:1.91e-50^RecName: Full=Hemicentin-1;^Eukaryota; Metazoa; Chordata; Craniata; Vertebrata; Euteleostomi; Mammalia; Eutheria; Euarchontoglires; Primates; Haplorrhini; Catarrhini; Hominidae; Homo`HMCN1_HUMAN^HMCN1_HUMAN^Q:3-572,H:4644-4830^46.842%ID^E:2.7e-46^RecName: Full=Hemicentin-1;^Eukaryota; Metazoa; Chordata; Craniata; Vertebrata; Eutele…	HMCN1_HUMAN^HMCN1_HUMAN^Q:18-572,H:4535-4716^48.649%ID^E:1.91e-50^RecName: Full=Hemicentin-1;^Eukaryota; Metazoa; Chordata; Craniata; Vertebrata; Euteleostomi; Mammalia; Eutheria; Euarchontoglires; Primates; Haplorrhini; Catarrhini; Hominidae; Homo`HMCN1_HUMAN^HMCN1_HUMAN^Q:3-572,H:4644-4830^46.842%ID^E:2.7e-46^RecName: Full=Hemicentin-1;^Eukaryota; Metazoa; Chordata; Craniata; Vertebrata; Eutele…	PF00090.20^TSP_1^Thrombospondin type 1 domain^5-55^E:6.3e-11`PF19030.1^TSP1_ADAMTS^Thrombospondin type 1 domain^8-55^E:5.2e-06`PF00090.20^TSP_1^Thrombospondin type 1 domain^63-113^E:2.9e-11`PF19030.1^TSP1_ADAMTS^Thrombospondin type 1 domain^66-113^E:3.1e-06`PF00090.20^TSP_1^Thrombospondin type 1 domain^121-171^E:1e-11`PF19030.1^TSP1_ADAMTS^Thrombospondin type 1 domain^124-171^E:3.6e-06	.	.	KEGG:hsa:83872`KO:K17341	PTHR10199:SF78	GO:0005912^cellular_component^adherens junction`GO:0005604^cellular_component^basement membrane`GO:0005938^cellular_component^cell cortex`GO:0032154^cellular_component^cleavage furrow`GO:0062023^cellular_component^collagen-containing extracellular matrix`GO:0070062^cellular_component^extracellular exosome`GO:0005509^molecular_function^calcium ion binding`GO:0005201^molecular_function^extracellula…	GO:0005912^cellular_component^adherens junction`GO:0005604^cellular_component^basement membrane`GO:0005938^cellular_component^cell cortex`GO:0032154^cellular_component^cleavage furrow`GO:0062023^cellular_component^collagen-containing extracellular matrix`GO:0070062^cellular_component^extracellular exosome`GO:0005509^molecular_function^calcium ion binding`GO:0005201^molecular_function^extracellula…	.	ATGGAGCCCCTGGTACTTGGTCAGCATGGGGAGCGTGTTCTACAACATGTGGAGATGGAGACCAAACTCGTACAAGAGCATGTGACAACCCAGCCCCGGCTAATGGAGGAAGCGAATGTAATCCAAGTGATCTTACAGACACACAGTCGTGTAATGATGGGGAATGCCCTGTTAACGGAGGTCTTGGAACCTGGTCTGCATGGGGAGCGTGTTCTACAACATGCGGAGATGGAGACCAAACTCGTACAAGAGCATGTGACAACCCAGCCCCAGCTAATGGAGGAAGCGAATGCAATCCAAGTGATCTGACAGAAACACAGTCATGTAATGATGGAGAATGTCCAGTTAACGGTGGTCCCGGACTCTGGTCAGCATGGGGAGCATGTTCTACAACATGCG…	GAPGTWSAWGACSTTCGDGDQTRTRACDNPAPANGGSECNPSDLTDTQSCNDGECPVNGGLGTWSAWGACSTTCGDGDQTRTRACDNPAPANGGSECNPSDLTETQSCNDGECPVNGGPGLWSAWGACSTTCGDGDQTRTRACDNPAPANGGSECNPSDLTETQSCNDGECPVNGGPGTWSAWGACSTTC	23.7072	5.49145	4112.54	2448.96	1881.64	1812.05	78.4292	118.918	1.51155	0.944779	12.2444	4.72067	6.96399
OFUSG03736.1	421.373	7.63867	0.696548	10.8227	2.68616e-27	2.07619e-25	D-ALANYL-D-ALANINE CARBOXYPEPTIDASE-RELATED	GIGA6_CRAGI^GIGA6_CRAGI^Q:328-1053,H:25-272^25.498%ID^E:1.4e-15^RecName: Full=Gigasin-6 {ECO:0000303|Ref.2};^Eukaryota; Metazoa; Spiralia; Lophotrochozoa; Mollusca; Bivalvia; Pteriomorphia; Ostreoida; Ostreoidea; Ostreidae; Crassostrea	GIGA6_CRAGI^GIGA6_CRAGI^Q:328-1053,H:25-272^25.498%ID^E:1.4e-15^RecName: Full=Gigasin-6 {ECO:0000303|Ref.2};^Eukaryota; Metazoa; Spiralia; Lophotrochozoa; Mollusca; Bivalvia; Pteriomorphia; Ostreoida; Ostreoidea; Ostreidae; Crassostrea	PF00144.25^Beta-lactamase^Beta-lactamase^33-377^E:4.6e-41	sigP:1^20^0.668^YES	.	.	PTHR43645:SF4	GO:0016021^cellular_component^integral component of membrane	GO:0016021^cellular_component^integral component of membrane	.	TTCAGATGTTGGTATCAATATCAATGAGTTACTAAGTGATCGACCAGATCAGGAATGTTAATTGCAATTTCTTTGAATTTGGCAATTGCTGACTGTGGAGCTAGCGTCTTAACATCGGTGTTTATATATATCTTCAGTGGTTTATTTTGATACATTTGGATAAACACACTACTGACCATGGTAGAACATAGCTTTGGATATATCTTAACTGTTTGATAGACGAAAACCAGGATGAAGTCCAGAATTGGGATATTCATATTATTTCATTTGGTAACTATGGGATATTTTGCTGATACCTATACGTTAGCAACAGAGGACGAATTTCAAATTGATCAGTTCGTTAACTCAACCATGGAGTGCAGACATGTACCTGGTCTCATAGTAACCGTCGTCAAGGGA…	MKSRIGIFILFHLVTMGYFADTYTLATEDEFQIDQFVNSTMECRHVPGLIVTVVKGNTTLVSKGYGMANIEEAIPARNTSVFCIGSVTKAFTSTVIAKLIETNSWLKWDSKITDIIGEDFKFNSQLLTNYTTITDLLSHRVGLVRWDISTQAGYPSYVTREDLVRRLYSLPSIGDFRDELQYNNHMYMLVGYIAEFVGGKTWEQLVDEFLLTPLEMTSTGYANELEEIEECLAEMYTYQNGKHFKVDPELRKIIKPGGPSGSICTTSSNMAAWMKLHINKGQTDTGVPVVDRDILQETYLPRIQRSVSQNNLFQPEWPIDNADITYAMGWNNGIYRGNKKLSHGGSFFGYSAQLWLFPQSDIGVFTAANGPTGADASLALRSINAYISDVLLGKEPWLN…	6.25954	11.811	2393.88	1922.34	883.013	931.378	411.233	484.336	539.44	836.302	984.908	1391.97	516.643
OFUSG09591.1	5166.14	7.63728	0.583973	13.0566	5.82712e-39	1.06163e-36	ACETYLSEROTONIN O-METHYLTRANSFERASE	ASMT_BOVIN^ASMT_BOVIN^Q:194-1147,H:18-345^38.182%ID^E:4.09e-66^RecName: Full=Acetylserotonin O-methyltransferase;^Eukaryota; Metazoa; Chordata; Craniata; Vertebrata; Euteleostomi; Mammalia; Eutheria; Laurasiatheria; Artiodactyla; Ruminantia; Pecora; Bovidae; Bovinae; Bos	ASMT_BOVIN^ASMT_BOVIN^Q:194-1147,H:18-345^38.182%ID^E:4.09e-66^RecName: Full=Acetylserotonin O-methyltransferase;^Eukaryota; Metazoa; Chordata; Craniata; Vertebrata; Euteleostomi; Mammalia; Eutheria; Laurasiatheria; Artiodactyla; Ruminantia; Pecora; Bovidae; Bovinae; Bos	PF16864.6^Dimerisation2^Dimerisation domain^8-93^E:5.8e-24`PF00891.19^Methyltransf_2^O-methyltransferase domain^127-310^E:3e-44`PF05175.15^MTS^Methyltransferase small domain^156-268^E:0.036`PF08241.13^Methyltransf_11^Methyltransferase domain^169-265^E:6.3e-05	.	.	KEGG:bta:281013`KO:K00543	PTHR11746:SF147	GO:0017096^molecular_function^acetylserotonin O-methyltransferase activity`GO:0008171^molecular_function^O-methyltransferase activity`GO:0042803^molecular_function^protein homodimerization activity`GO:0008757^molecular_function^S-adenosylmethionine-dependent methyltransferase activity`GO:0019438^biological_process^aromatic compound biosynthetic process`GO:0030187^biological_process^melatonin bios…	GO:0017096^molecular_function^acetylserotonin O-methyltransferase activity`GO:0008171^molecular_function^O-methyltransferase activity`GO:0042803^molecular_function^protein homodimerization activity`GO:0008757^molecular_function^S-adenosylmethionine-dependent methyltransferase activity`GO:0019438^biological_process^aromatic compound biosynthetic process`GO:0030187^biological_process^melatonin bios…	GO:0008171^molecular_function^O-methyltransferase activity`GO:0008168^molecular_function^methyltransferase activity	CACAGGTGTTGTTTGCATTGGGATTGTCACCCTTGCCCCTTCACAATTATATGTAATCTGAAGACTTGATAAATGCTCAGTGCAAGTACATTTCCCATTAACAAAGGATTGCTTCCGTGCAGGATTTTATCTAAATATCATAAGTATAAGGAACATGGCACTTGAAAAGCAGGAAATTGTGGACATCTTGTATGGCTTCCAGAAAACACAGATTCTCTTCTCGGCAGGAGAGCTCGGTGTATTTGAAGAGCTCACAAATGGTCCTCTATCGTCCAAAGCCATTGCAGCGAAAATCAAAGCCAATCCAGATGCCACAGAGAGACTTCTCAACGCATGTGTCGGGTTAAAACTTTTGAACAAAACTCTTAAAGATGGGGAAACGATCTACAATAACCCCGA…	MALEKQEIVDILYGFQKTQILFSAGELGVFEELTNGPLSSKAIAAKIKANPDATERLLNACVGLKLLNKTLKDGETIYNNPDSTTKYLTKSSPDSVRWMTNLNVVYPMWGQLKDCVVKGDRVSSEEFFNYYVTPTTQLEFMRSMHIICSMDAPKLVNVFDLSSYSVACDLGGSTGSLAKALVKAYPTMKVTVMDRSDVVQQSRDFMSEGRSEAISYSGGDFFVDAFPDADLYILAHTFHNWSPEKLDALLDKIMATMKSGGALLVLEKFLDEDKSGPMESLLLDMDMLLCAEGRERSLSEYKEKLEKHGFTDIKSKVVENALWYDAIICKKK	62.5098	48.4508	15151.3	9699	25186.2	20336.5	28709.5	22811.2	7276.03	5278.29	1059.84	2947.08	467.672
OFUSG07625.1	437.299	7.6197	0.930611	8.08253	6.3435e-16	1.76567e-14	LIM/HOMEOBOX PROTEIN LHX9	LHX2_MOUSE^LHX2_MOUSE^Q:126-1139,H:41-383^55.866%ID^E:5.69e-128^RecName: Full=LIM/homeobox protein Lhx2;^Eukaryota; Metazoa; Chordata; Craniata; Vertebrata; Euteleostomi; Mammalia; Eutheria; Euarchontoglires; Glires; Rodentia; Myomorpha; Muroidea; Muridae; Murinae; Mus; Mus	LHX2_MOUSE^LHX2_MOUSE^Q:126-1139,H:41-383^55.866%ID^E:5.69e-128^RecName: Full=LIM/homeobox protein Lhx2;^Eukaryota; Metazoa; Chordata; Craniata; Vertebrata; Euteleostomi; Mammalia; Eutheria; Euarchontoglires; Glires; Rodentia; Myomorpha; Muroidea; Muridae; Murinae; Mus; Mus	PF00412.23^LIM^LIM domain^58-114^E:1.4e-15`PF00412.23^LIM^LIM domain^120-175^E:3e-15`PF00046.30^Homeodomain^Homeodomain^252-308^E:6.2e-19`PF05920.12^Homeobox_KN^Homeobox KN domain^276-304^E:5.9e-05	.	.	KEGG:mmu:16870`KO:K09373	PTHR24208:SF95	GO:0005654^cellular_component^nucleoplasm`GO:0005634^cellular_component^nucleus`GO:0003682^molecular_function^chromatin binding`GO:0001228^molecular_function^DNA-binding transcription activator activity, RNA polymerase II-specific`GO:0000981^molecular_function^DNA-binding transcription factor activity, RNA polymerase II-specific`GO:0046872^molecular_function^metal ion binding`GO:0000978^molecular…	GO:0005654^cellular_component^nucleoplasm`GO:0005634^cellular_component^nucleus`GO:0003682^molecular_function^chromatin binding`GO:0001228^molecular_function^DNA-binding transcription activator activity, RNA polymerase II-specific`GO:0000981^molecular_function^DNA-binding transcription factor activity, RNA polymerase II-specific`GO:0046872^molecular_function^metal ion binding`GO:0000978^molecular…	GO:0003677^molecular_function^DNA binding`GO:0006355^biological_process^regulation of transcription, DNA-templated	ATTTGATCTATAGAATGGTGGAGAAGACTCACCAGAGCATGTCTTGTGACGGAACACGAATCCAGTCATGTGAACAAGCAAGAACATTAGACCATAACCCACATCGCAGAATGATCGAAAATCAGACGATCCCAATGATATCAGACGACAACGCCAGAGAGCTTCCCAATGTGTGCGCCGCCTGCGGAGGACAAATTCAGGATAGGTATTACCTAATGGCTATGGAGAAGCAGTGGCACATGCAATGCTTGAGATGTTGCGAGTGCAAGCTGCGACTAGACTCTGACATCACCTGTTTCTGGAGAGACGGTAATGTTTACTGCAAAGAGGATTATTACAGGCGATATGGCGTGAAAAGGTGTGCTCGTTGTCACATAGGGATATCTTCTGACGAGATGG…	LIYRMVEKTHQSMSCDGTRIQSCEQARTLDHNPHRRMIENQTIPMISDDNARELPNVCAACGGQIQDRYYLMAMEKQWHMQCLRCCECKLRLDSDITCFWRDGNVYCKEDYYRRYGVKRCARCHIGISSDEMVMRAKDLVYHLSCFTCTSCNKTLSTGEHFGMRDSIIFCREHYEMSLQGEFIPNISPNLPGGAQGQMPFYNGVGAVQKGRPRKRKSPMPDPMDDVTSLCDYGMDSDMHDLSDSTYSSSRQKRMRTSFKHHQLRTMKSYFNLNHNPDAKDLKQLAQKTGLTKRVLQVWFQNARAKYRRNLLRQESGEGNNNNNSKNDGQLSSSEMGSPGSNAMADLSNSRSPALSDISSTPSLSDLQSGTMDHMDSMDTIDRLSRLEHDQSSSLTDIFH…	18.7616	5.37844	4214.9	2449.39	550.885	836.202	436.921	309.805	491.476	458.422	661.573	595.702	727.353
OFUSG03861.1	49173.8	7.5829	0.379617	19.9695	1.01434e-88	3.16215e-85	BETAINE--HOMOCYSTEINE S-METHYLTRANSFERASE 1	BHMT1_BOVIN^BHMT1_BOVIN^Q:142-1302,H:10-397^70.876%ID^E:0^RecName: Full=Betaine--homocysteine S-methyltransferase 1;^Eukaryota; Metazoa; Chordata; Craniata; Vertebrata; Euteleostomi; Mammalia; Eutheria; Laurasiatheria; Artiodactyla; Ruminantia; Pecora; Bovidae; Bovinae; Bos	BHMT1_BOVIN^BHMT1_BOVIN^Q:142-1302,H:10-397^70.876%ID^E:0^RecName: Full=Betaine--homocysteine S-methyltransferase 1;^Eukaryota; Metazoa; Chordata; Craniata; Vertebrata; Euteleostomi; Mammalia; Eutheria; Laurasiatheria; Artiodactyla; Ruminantia; Pecora; Bovidae; Bovinae; Bos	PF02574.17^S-methyl_trans^Homocysteine S-methyltransferase^15-305^E:2.6e-53	.	.	KEGG:bta:497025`KO:K00544	PTHR46120:SF1	GO:0005737^cellular_component^cytoplasm`GO:0047150^molecular_function^betaine-homocysteine S-methyltransferase activity`GO:0008270^molecular_function^zinc ion binding`GO:0006579^biological_process^amino-acid betaine catabolic process`GO:0009086^biological_process^methionine biosynthetic process`GO:0032259^biological_process^methylation	GO:0005737^cellular_component^cytoplasm`GO:0047150^molecular_function^betaine-homocysteine S-methyltransferase activity`GO:0008270^molecular_function^zinc ion binding`GO:0006579^biological_process^amino-acid betaine catabolic process`GO:0009086^biological_process^methionine biosynthetic process`GO:0032259^biological_process^methylation	.	ATTCAACTGTGAAAATGTGAAGTGATTTTCAGTATAATGTGGTTTAATCTGGATATAAAACCTGGCCCCTAGACCCTCCTAAACTATTGCCACTCTGAACCTGACTGCAGAACCAAGCTGACACACACTGAAAATATGCCTAAAAAAGGAATTCTTGAGAGACTGAGGGATGGAGTTGTTATTGGAGATGGTGGCTTTGTATTTGCCCTGGAGAAGAGAGGTTATGTCAAGGCTGGACCATGGACCCCTGAGGCTGCCTGTGAACACCCAGAGGCAGTTAAGCAACTTCACAGGGAGTTCTTGAGAGCAGGTTCAGATGTCATGCAAGCTTTCACATTCTATGCTAGTGATGACAAACTTGAGAACAGGGGTCACTACGCTCAGAAGTCACTCACTGGC…	MPKKGILERLRDGVVIGDGGFVFALEKRGYVKAGPWTPEAACEHPEAVKQLHREFLRAGSDVMQAFTFYASDDKLENRGHYAQKSLTGKSINKAASKLARDVANEGDALVAGGMCQTPTYLSGIGKEATQKMFQVQLDAFIEEDVDFLICEYFEHVEEAEWAIEVCKKSGKPVAGTMCIGPEGDLHGVTAGECAVRLAKAGADIVGVNCHFDPQISLECISKMKEGLDAAGLKPYLMAQPLAYHTPDCNKQGFIDLPEFPFALEPRICTRWDMHKYARDAYNLGVRYIGGCCGFEAYHVRAIAEELAEERGAKPAGSDKHGMWGQELKMHTKPWVRARANKEYWETTKPATGRPYSASMAKPAGWGITQGNEELKQHAEGTTSDELQHVRDIASSKK	555.518	167.828	81092.5	59291.6	162328	143557	221567	225018	137096	124253	58281.4	65759.2	48515
OFUSG18225.1	8764.51	7.55933	0.778258	9.6853	3.48172e-22	1.79571e-20	.	.	.	.	.	.	.	.	.	.	.	TATAGCCGAGAGTGATGAATACGAAGTGTTCGCGAGAAACCTGTTGATGCGTCTCCTTAGGAAACTCGATTTGCATCTGAACTGGAATCTCTCGAGCAGGCTATCGAAGCTACAAAGAGAAAGTGGTCAAATGCTGGTGATGAGTGCAGGACTAGCTCTGGTAAGGTGTGCTCTAGTGTTGGTGGAAGGTGTTGCAAGTCCTCTTCCACAAGTATGGCCGAATGCAAGAAGGATACTGGATGTTGTCTCACCGATGCCTACCCCAGAACCTACAGGGCATGTGCCCCATGAGTCTATTGAAGTTTATTTTTTCGTTAAACATTTAGAAATTGAAAAATACAAGCATAACGTGACTAATAAGTAACACTGGACTTAAATGTTAAATCTCAATAAGATCCT…	IAESDEYEVFARNLLMRLLRKLDLHLNWNLSSRLSKLQRESGQMLVMSAGLALVRCALVLVEGVASPLPQVWPNARRILDVVSPMPTPEPTGHVPHESIEVYFFVKHLEIEKYKHNVTNK	2.06883	22.9417	4231.7	2221.17	23116	13793.7	49037.8	31699.6	56951	34416.3	15458.5	4866.52	750.365
OFUSG11470.1	242.399	7.52239	0.665253	10.9354	7.80245e-28	6.25467e-26	ALX HOMEOBOX PROTEIN 1-LIKE PROTEIN	RX2_CHICK^RX2_CHICK^Q:360-881,H:123-302^40%ID^E:2.86e-24^RecName: Full=Retinal homeobox protein Rx2;^Eukaryota; Metazoa; Chordata; Craniata; Vertebrata; Euteleostomi; Archelosauria; Archosauria; Dinosauria; Saurischia; Theropoda; Coelurosauria; Aves; Neognathae; Galloanserae; Galliformes; Phasianidae; Phasianinae; Gallus	RX2_CHICK^RX2_CHICK^Q:360-881,H:123-302^40%ID^E:2.86e-24^RecName: Full=Retinal homeobox protein Rx2;^Eukaryota; Metazoa; Chordata; Craniata; Vertebrata; Euteleostomi; Archelosauria; Archosauria; Dinosauria; Saurischia; Theropoda; Coelurosauria; Aves; Neognathae; Galloanserae; Galliformes; Phasianidae; Phasianinae; Gallus	PF00046.30^Homeodomain^Homeodomain^73-129^E:2.7e-22	.	.	.	PTHR24329:SF520	GO:0005634^cellular_component^nucleus`GO:0043565^molecular_function^sequence-specific DNA binding`GO:0007275^biological_process^multicellular organism development`GO:0006355^biological_process^regulation of transcription, DNA-templated	GO:0005634^cellular_component^nucleus`GO:0043565^molecular_function^sequence-specific DNA binding`GO:0007275^biological_process^multicellular organism development`GO:0006355^biological_process^regulation of transcription, DNA-templated	GO:0003677^molecular_function^DNA binding	TAATTCTAGCCACGATCTTCTCGTGGACCAAAAAGGCACAATCTATATAAATATACAGTATTTTAAATTGCATTACCATTCTTAAAACCTTAGTTTCTTCAAACTTACTTCCGAAACTAATCATCTTTCAGAATATTTTGGAAATGGCGGATGAATCTAGGGTACCTGTAGACGATGACAAACGCAAGTGTGAAGATTTTACATCTTTATATTCAATGGACGCACAGAGGCCGCTAACTGACGCAGGAGTTGAAGGAGCGTTCAAAAAAATCAAACAAGATGGCGCTATCAATCAAATGTCGTCTGCTAACTCTATATCCCCCGGTCACAATCCCGCCACGTGTCCCACCCCCGCGCGCAGACGACATCGGACTACTTTTACCCAGGAACAGTTACAAG…	MADESRVPVDDDKRKCEDFTSLYSMDAQRPLTDAGVEGAFKKIKQDGAINQMSSANSISPGHNPATCPTPARRRHRTTFTQEQLQELESAFAKSHYPDIYCREELARVTKLNEARIQVWFQNRRAKYRKQEKQLAKSLSPVIPTCNGMMRNIYPSATRGYPYPAPNPAVNSMTSMARYPQMNSSYAPMTHAQFSTMGSMGPPTANMGMAGRHAQGIQQLSMATSDYGLESHEDDWYNKSLTALRMNNSVSHPGLANTVSLGYQT	5.20647	3.23336	1236.7	575.372	980.375	906.145	569.182	669.914	249.768	360.146	393.9	297.437	279.123
OFUSG09187.1	26.1576	7.49564	1.40456	4.68519	2.79694e-06	2.11577e-05	.	.	.	.	sigP:1^25^0.685^YES	.	.	.	.	.	.	CTTGAACTCATACGTTTTGCTGTACACACCTCTGAAAGTCCATGTTGCAACATTGATTCAGGTTTTGGGCTTCCAATGCCAGGTTTGAATCACAGACTTTTTGCAAAATGATTAAAACCAGAGTTCAGATGCTTTTTATTCTCATTCCATGCAATCCATTACATGAAAAGACTTGAGAAAATATAACGAATGGAGAAGTGAAATTACATTAAAGTGAAACAAGCTAGGTGATATTAAAAACACTAGAGGAAAAAACTGGAAACCCATTTTGTGTGAGATAAGTAGTGCCTTTTCTTATATTCAAAAGCTCATAGACACCAGGGCAAAATGTGGCGCAAATCAAATGCAATGTTCTTTATGACAATTATTTTTACCATTGTCAGTAAAGCACCTGTTTCA…	MWRKSNAMFFMTIIFTIVSKAPVSSLSTNQQTTTEKQDWIFPCGKSKIPCDKINNFCEERMDKCIPCLEYCSEARIKGHENYQTQCRENCPVFMRDKENKRTRKLNNPTGSSLEAKASTGDPLTITAKTESDVEHKEQQNDLKIPLSIIVSILGLAIIGIGIVIWKHHKTKRPKQCENNVETGARDPLMTDKNKLIRTAGSSVPSQTCGCFSECQHKCGNSDIANQNDFEAETELKAENNDLVIGNQSC	0	1.07557	442.972	83.4873	44.4854	24.345	1.58874	3.42989	2.87341	7.67286	4.39739	24.3286	4.15666
OFUSG18411.1	452.146	7.47417	0.896203	8.3747	5.53638e-17	1.74729e-15	SUBFAMILY NOT NAMED	.	.	.	sigP:1^29^0.695^YES	.	.	PTHR45645:SF52	.	.	.	ATCAGTTACAATTCAGGAGAAAAGATGCAGCTCAAATTTTGGCTTGTGAAAGTGATGTTCGCTTGTGTGACAGTTCTCACAAGTGCGATTGAACCGGAAACTACCATATTATTGGAAACAACAATCCTACCAACAACCACTCTTATACCAACTACTACCCTACTGGAAACAACAATCCTACCAACAACCACTCTAATACCAACTACTACCCTATTGGAAACAACAATCCTACCAACAACCACTCTAATACCAACTACTACCCTATTGGAAACGACGACGTTACCAACCACTACTATTCTCCCAACCACTACCCTCGAAAGTCAACCACCAGCTACGCAGATACCAG	ISYNSGEKMQLKFWLVKVMFACVTVLTSAIEPETTILLETTILPTTTLIPTTTLLETTILPTTTLIPTTTLLETTILPTTTLIPTTTLLETTTLPTTTILPTTTLESQPPATQIP	34.5132	5.40066	3202.11	4441.96	2309.48	1875.35	144.548	169.927	0	0.961859	2.16292	0.895739	1.60997
OFUSG01392.1	7369.11	7.4685	1.2933	5.71494	1.09741e-08	1.23903e-07	PYRIDOXAL 5'-PHOSPHATE SYNTHASE SUBUNIT SNZ1-RELATED	PDX1_SUBDO^PDX1_SUBDO^Q:142-1011,H:14-303^76.207%ID^E:1.97e-164^RecName: Full=Pyridoxal 5'-phosphate synthase subunit SNZERR;^Eukaryota; Metazoa; Porifera; Demospongiae; Heteroscleromorpha; Suberitida; Suberitidae; Suberites	PDX1_SUBDO^PDX1_SUBDO^Q:142-1011,H:14-303^76.207%ID^E:1.97e-164^RecName: Full=Pyridoxal 5'-phosphate synthase subunit SNZERR;^Eukaryota; Metazoa; Porifera; Demospongiae; Heteroscleromorpha; Suberitida; Suberitidae; Suberites	PF01680.18^SOR_SNZ^SOR/SNZ family^12-217^E:2.5e-109`PF05690.15^ThiG^Thiazole biosynthesis protein ThiG^208-261^E:5.4e-06	.	.	.	PTHR31829:SF0	GO:0036381^molecular_function^pyridoxal 5'-phosphate synthase (glutamine hydrolysing) activity`GO:0042823^biological_process^pyridoxal phosphate biosynthetic process	GO:0036381^molecular_function^pyridoxal 5'-phosphate synthase (glutamine hydrolysing) activity`GO:0042823^biological_process^pyridoxal phosphate biosynthetic process	.	TAAGTGAATTCTTGTGAGTTGTAAGGGTGCCAAATTAGGGAAACGCGAATCTAACTTGGATTGAGCAAACGGAAGAAGTAGAAGCGAATATTAACAATACAGAAACTGAATAAGAAAATGCCTATTTTACCAGGAGTTACAAATGGAACGTTTGCAGTGAAGTCCGGCCTAGCTCAGATGGCAAAGGGTGGCATCGTAATGGATGTTGTCAATGCCGAACAGGCTAAAATTGCAGAGGACGCCGGGGCATGCGCAGTTATGGCCCTAGAGAGAGTACCAGCAGACATACGCAAAGACGGGGGTGTGGCAAGAATGTGTGACCCGAGAAAAGTTAAAGAAATAATGGAGGCAGTTACAATCCCAGTGATGGCCAAGGCTAGGATTGGTCACTTTGCTGAG…	MPILPGVTNGTFAVKSGLAQMAKGGIVMDVVNAEQAKIAEDAGACAVMALERVPADIRKDGGVARMCDPRKVKEIMEAVTIPVMAKARIGHFAEAQILQSLGVDMVDESEVLTPADPENHINKRDFTVPFVCGARNLGEALRRISEGAAMIRTKGEAGTGNVIEAVRHARTIKRDISLAKGMDDSELFSYAKQLQVPYELLKKTAELGRLPVVNFAAGGLATPADVSLLMQLGVDGVFVGSGIFKSNNPKKRADAMAEAVTHYKDPKILANLSEDLGEAMVGINCDDMEHKFSVRESMLDNKMEALNMQGTALKQS	111.47	99.0659	44545.5	29726.4	42902.5	36239	18362.2	17089	2791.9	2137.23	1168.79	902.236	1828.58
OFUSG05680.1	91.5389	7.46605	1.07283	5.47673	4.33254e-08	4.45267e-07	DI-N-ACETYLCHITOBIASE	DIAC_HUMAN^DIAC_HUMAN^Q:241-1245,H:41-378^38.968%ID^E:6.67e-69^RecName: Full=Di-N-acetylchitobiase;^Eukaryota; Metazoa; Chordata; Craniata; Vertebrata; Euteleostomi; Mammalia; Eutheria; Euarchontoglires; Primates; Haplorrhini; Catarrhini; Hominidae; Homo	DIAC_HUMAN^DIAC_HUMAN^Q:241-1245,H:41-378^38.968%ID^E:6.67e-69^RecName: Full=Di-N-acetylchitobiase;^Eukaryota; Metazoa; Chordata; Craniata; Vertebrata; Euteleostomi; Mammalia; Eutheria; Euarchontoglires; Primates; Haplorrhini; Catarrhini; Hominidae; Homo	PF00704.29^Glyco_hydro_18^Glycosyl hydrolases family 18^165-381^E:2.4e-29	sigP:1^26^0.749^YES	.	KEGG:hsa:1486`KO:K12310	PTHR46290:SF1	GO:0005615^cellular_component^extracellular space`GO:0005764^cellular_component^lysosome`GO:0008061^molecular_function^chitin binding`GO:0004568^molecular_function^chitinase activity`GO:0006032^biological_process^chitin catabolic process`GO:0009313^biological_process^oligosaccharide catabolic process	GO:0005615^cellular_component^extracellular space`GO:0005764^cellular_component^lysosome`GO:0008061^molecular_function^chitin binding`GO:0004568^molecular_function^chitinase activity`GO:0006032^biological_process^chitin catabolic process`GO:0009313^biological_process^oligosaccharide catabolic process	GO:0005975^biological_process^carbohydrate metabolic process	TCTACATGTTGCAACACATGATTACTGTTTATCATAATGGGATTCGAATTTCACAAAACTATTTTGACTCTACTTTTCGTAATTTTCCCAATCTTCACCACGGGATGCATTTCAAGACAATTGATGAACGGAGGGGCAAATGCGGAAAATATAAACACTAATATCATCGATGATAATGACAAACGAAACCAACAGCACCATCACCACCACACTTCAATGTCAAATAAGGGAGAATCGGTATGCCCATGTGCAGACGATAAGCTTTGTGAACCTATTTCAACGCCTACTAGGAAAGAAGTGTTCGCTTATGTCGGTTCGCCTGACACTGACTGGAAAGCATTTGATTGGAATAAAATCACGACTATCTGGACACATAAGAACTACACCTCCATTGCACAG…	MGFEFHKTILTLLFVIFPIFTTGCISRQLMNGGANAENINTNIIDDNDKRNQQHHHHHTSMSNKGESVCPCADDKLCEPISTPTRKEVFAYVGSPDTDWKAFDWNKITTIWTHKNYTSIAQLMCFAHSKGARVIYLSQLLQQPDFQVPSRRYEWILTEFQYTLDNHLDGINIDYEYNVTRVGMEEDAKALTAFMSELTAVFKGHFSGYQISFDAPWSPICCLRYYNYVEMSKMIDFIFVMSYDQWFPFEIVLSYAGPNSGLLQTIKGIQEYIDSGVPSNKLIVGVPWYGYNQSCTHLIEDNCYMRPRSGVETAYKEAMVLLKTSSIGGRKWDNTNKSPYFNYKDELGQVHQMWYDDPESLKYKYELVPQMELAGVGMWTADMLDYSNSSSVTSAQTKAM…	1.04213	0	208.106	151.341	125.424	166.185	187.502	207.999	261.759	256.008	245.04	356.198	295.069
OFUSG26497.1	53.9405	7.46186	1.21488	4.97961	6.3714e-07	5.39253e-06	MIP08469P	RHES_HUMAN^RHES_HUMAN^Q:375-1145,H:13-265^49.807%ID^E:4.21e-70^RecName: Full=GTP-binding protein Rhes;^Eukaryota; Metazoa; Chordata; Craniata; Vertebrata; Euteleostomi; Mammalia; Eutheria; Euarchontoglires; Primates; Haplorrhini; Catarrhini; Hominidae; Homo	RHES_HUMAN^RHES_HUMAN^Q:375-1145,H:13-265^49.807%ID^E:4.21e-70^RecName: Full=GTP-binding protein Rhes;^Eukaryota; Metazoa; Chordata; Craniata; Vertebrata; Euteleostomi; Mammalia; Eutheria; Euarchontoglires; Primates; Haplorrhini; Catarrhini; Hominidae; Homo	PF00071.23^Ras^Ras family^17-182^E:7.9e-36`PF08477.14^Roc^Ras of Complex, Roc, domain of DAPkinase^17-140^E:8.5e-11	.	.	KEGG:hsa:23551`KO:K07844	PTHR46149	GO:0005886^cellular_component^plasma membrane`GO:0045202^cellular_component^synapse`GO:0031681^molecular_function^G-protein beta-subunit binding`GO:0005525^molecular_function^GTP binding`GO:0003924^molecular_function^GTPase activity`GO:0043548^molecular_function^phosphatidylinositol 3-kinase binding`GO:0031624^molecular_function^ubiquitin conjugating enzyme binding`GO:0007626^biological_process^l…	GO:0005886^cellular_component^plasma membrane`GO:0045202^cellular_component^synapse`GO:0031681^molecular_function^G-protein beta-subunit binding`GO:0005525^molecular_function^GTP binding`GO:0003924^molecular_function^GTPase activity`GO:0043548^molecular_function^phosphatidylinositol 3-kinase binding`GO:0031624^molecular_function^ubiquitin conjugating enzyme binding`GO:0007626^biological_process^l…	GO:0003924^molecular_function^GTPase activity`GO:0005525^molecular_function^GTP binding	TACATGGATACGAATGTTGCACTGCGGCATAATTCACTTCTAGAGGCAAGAATTTGTTCACCTAACTGTGCTGCTAATACAGTCTCAGATGTTTCCGAATGCTAATTGATGCCTGCTGCTATAAATTGGAACGTCGCAATACTGTAATTTGAAATCAAATACAGCCAATTTCTAATTTCTTCGAATCAATTCCCGACCGAAACAATGCCAGATGTACATTGTAATGCTATACGTATACGAGGCCCAGGATAAGGTTGGCGAATAGAACAAATCGATTAAACTACATTTCAAAATCAACATTACTTTGGGCAAGAACTTGGTACTTGGTGGGAGATTCAAAGAATTGACTAATGGCGCTGGTAGAGGAGGCAGAGAATGCGCCGTTGAGTCATTCCTTCA…	MALVEEAENAPLSHSFRLVILGSPKTGKTSIVSRFLDNKFTDVYTPTIEDFHRKVYRIRGEAYRLDILDTSGNHPYPAMRRLSLLTGDLFLLTYSIDNFESFEEVKCLREQILETKGITPNQREKLLEIPMVVIGNKVDKSDLRVVDRNLVKDYCASQIGVAHIEGSAKKDINIEAVFLKLFMMAHLPTEMSPSLHRKVTPNYVGSSSPKGLRAVGLRRKLSDACGAITPHVRRPSIRTDLMIIQAKQSSTDKDDVKRKESKCCLM	1.041	0	222.617	186.948	45.5241	17.9963	52.4768	86.6928	41.9243	45.9595	129.939	139.275	473.423
OFUSG02501.1	2392.68	7.3578	0.636454	11.2712	1.8209e-29	1.68056e-27	.	.	.	.	.	.	.	.	.	.	.	TATTGGTCAGTGCGAAAATTACCAAGCACATTCGCTGATTATTCTCGAAGACATCGAATACAACCTTCTCGTTGATTACcaacaacaaaaacaacaacaaTCATGCCTGAACCATGCAAATGCAGTACTACAAGCAGCAAAGATGATAGCACTCCCCGAACCGGACAAATGGCTGGTGATGGCTGCCCCTGTGAAAAATGCAAAGACTGTGAATGCAGAGATACTTGCTTCGATGCGGATGGCGTATGCACATGTACTAAAGGATGCTGCGAATAATGAGGGTATCGACCTTTCTCTGTACAAAGCAATCCACACTCCATGTACATACATATTGGCTACACTCTTTTGACTGAATAATTCGTTATTCCTCGATGTGGA	IGQCENYQAHSLIILEDIEYNLLVDYQQQKQQQSCLNHANAVLQAAKMIALPEPDKWLVMAAPVKNAKTVNAEILASMRMAYAHVLKDAANNEGIDLSLYKAIHTPCTYILATLF	12.163	1.08949	1891.84	522.033	5639.37	1791.7	8488.82	2121.54	16080.7	3221.18	9169.6	3673.49	11955.2
OFUSG20621.1	938.809	7.33923	0.8459	8.58687	8.93696e-18	3.07285e-16	PHOSPHATIDYLGLYCEROL/PHOSPHATIDYLINOSITOL TRANSFER PROTEIN	NPC22_DICDI^NPC22_DICDI^Q:903-1268,H:18-135^29.268%ID^E:9.22e-06^RecName: Full=Putative phosphatidylglycerol/phosphatidylinositol transfer protein 2;^Eukaryota; Amoebozoa; Evosea; Eumycetozoa; Dictyostelia; Dictyosteliales; Dictyosteliaceae; Dictyostelium	NPC22_DICDI^NPC22_DICDI^Q:903-1268,H:18-135^29.268%ID^E:9.22e-06^RecName: Full=Putative phosphatidylglycerol/phosphatidylinositol transfer protein 2;^Eukaryota; Amoebozoa; Evosea; Eumycetozoa; Dictyostelia; Dictyosteliales; Dictyosteliaceae; Dictyostelium	PF02221.16^E1_DerP2_DerF2^ML domain^109-229^E:1.2e-08	.	.	KEGG:ddi:DDB_G0282109	PTHR11306:SF52	GO:0032934^molecular_function^sterol binding`GO:0015918^biological_process^sterol transport	GO:0032934^molecular_function^sterol binding`GO:0015918^biological_process^sterol transport	.	AATCCATTTGGGAAACATCGAGCATTAATATTTAATCAGTGGGTTAAGAAGTAAAATAGATAAACGGATAATACAGGTTGCATGTGATAATTCTTCTGCCATCGTGTACAGTTTTAAGTGTATTCGGGACTGTGATGTGTGCCATTCTCAGCATATAAAAGAAGGCTATCACAGAACTGGTTCAAACAGATTTGGAAAACAAGGCACTAGTTCAGCAAAACTCAAGATCTACAATTACCTGACATTTATTAGTGAGAACAAGGATGTAAAAGTTTTGGCAATCTTTCAATATCCCTAGATTAATTGCTACATCTTGGCAAGAATACTGACAACAAAATCAGCTGATTTTTTGGTAAACTAGGATGCTCACACAATACTGTACAAGGGTCGTGACATTTT…	MAWKKVLAGTAIISFLLAGIYVMYFQHGSPEDILAANRRSTLRKTHSVKDNMKRLHVEYGKNESDEDFDDSEEYDDEEDETDIVKSSQLLWDRWIEKNNHVSIGEIYDKCEGDDRVTIGRVILIQDKVKGGVASVTYVNHTWDHVIDDGEVLIDVKYNNKNLYNNKWELCTIDEDEEERIVFCPIKSNEKHYVKQMKIPNYLPKGRYQAKVWLLDQEEVNVACGFADFTI	12.5009	5.38436	1850.95	1754.91	4563.6	3651.96	2644.79	3636.44	1106.55	1606.21	543.086	741.706	3186.81
OFUSG24918.1	215.741	7.33252	1.10275	5.8592	4.65115e-09	5.5768e-08	.	.	.	.	.	.	.	.	.	.	.	ACCGGGACACGGTTTTATGCAGAGTTGAAGGAAGTGAGATATATTTTACAACATACGTAGTCTCAGATATAACATAACATGAAGTTGAATCATGGGCATTCATTGAAGTTTCGGGAGGATTTGAGCAATTGAATTAGGAACTTTATATAAAAATACTCAAGTACCTACTTGTGTTGTAAAACTGGAAAACGATTGGAACAAATTATAGCTCTCTACAAAAGTAGTTGGAATTAATAAAACTGATAAAGGATAAGTTAACCATGATATGTCAACAGATGATGTCAAATTGAGACATACCTTAACCAGTGATGTCAAGTTGAGAACCAAGTGATGTCAAATTGAGGAATTATGTGAAAATAGTGTAATAGAGGGAAATAGTACATGTTAGATAAATTACTG…	MATFRKLFGFWNKKQKSPTDKKGSWSKHKIRKARSLDTLDRDGDIHDIMNVLTAAEGETVRKKKQILHYQKHKIMAELETMENMGYGEDVLTDDTITNDEIDVDLEPVQQEFNPVIEIEAQSVRMRRENIAQLWTGLENQGFQNDAIDDVYNNSQISVDLNFTPGTSTTDPTRLASPRPGSLLSERLIDAPPPLPIRANRPSNKQNVSFSDLDLDETSSDSGYKEKSKKKKSKLKNKKKQRKNTDPEWEIVMDRQYIRRVCVSENDILNDASDSIETLDSSEEDVFSGQSQVSFATQGFKVTFHEEQEPYTQNAILAKEVHIVPPESNRSSVISNMSEVKFHTISNERNIEGRTNLNNWLTWVEAPQNPDGETSGVGRKMWNLVNVKNQRNSGDLSDVP…	0	2.14701	198.384	488.116	740.354	891.15	379.449	651.623	394.728	411.004	696.384	441.346	457.437
OFUSG18814.1	421.609	7.3079	0.347429	20.8313	2.25203e-96	7.89816e-93	FEZ FAMILY ZINC FINGER PROTEIN 2	FEZF2_MOUSE^FEZF2_MOUSE^Q:968-1531,H:256-441^80.319%ID^E:5.75e-106^RecName: Full=Fez family zinc finger protein 2;^Eukaryota; Metazoa; Chordata; Craniata; Vertebrata; Euteleostomi; Mammalia; Eutheria; Euarchontoglires; Glires; Rodentia; Myomorpha; Muroidea; Muridae; Murinae; Mus; Mus	FEZF2_MOUSE^FEZF2_MOUSE^Q:968-1531,H:256-441^80.319%ID^E:5.75e-106^RecName: Full=Fez family zinc finger protein 2;^Eukaryota; Metazoa; Chordata; Craniata; Vertebrata; Euteleostomi; Mammalia; Eutheria; Euarchontoglires; Glires; Rodentia; Myomorpha; Muroidea; Muridae; Murinae; Mus; Mus	PF00096.27^zf-C2H2^Zinc finger, C2H2 type^265-284^E:2.8e-05`PF13912.7^zf-C2H2_6^C2H2-type zinc finger^265-284^E:0.012`PF00096.27^zf-C2H2^Zinc finger, C2H2 type^293-315^E:0.00024`PF00096.27^zf-C2H2^Zinc finger, C2H2 type^321-343^E:6.3e-06`PF13894.7^zf-C2H2_4^C2H2-type zinc finger^321-343^E:0.001`PF13912.7^zf-C2H2_6^C2H2-type zinc finger^321-343^E:0.0056`PF00096.27^zf-C2H2^Zinc finger, C2H2 type^34…	.	.	KEGG:mmu:54713	PTHR24388:SF74	GO:0005634^cellular_component^nucleus`GO:0003682^molecular_function^chromatin binding`GO:0003677^molecular_function^DNA binding`GO:0001228^molecular_function^DNA-binding transcription activator activity, RNA polymerase II-specific`GO:0003700^molecular_function^DNA-binding transcription factor activity`GO:0001227^molecular_function^DNA-binding transcription repressor activity, RNA polymerase II-sp…	GO:0005634^cellular_component^nucleus`GO:0003682^molecular_function^chromatin binding`GO:0003677^molecular_function^DNA binding`GO:0001228^molecular_function^DNA-binding transcription activator activity, RNA polymerase II-specific`GO:0003700^molecular_function^DNA-binding transcription factor activity`GO:0001227^molecular_function^DNA-binding transcription repressor activity, RNA polymerase II-sp…	GO:0003676^molecular_function^nucleic acid binding	CTCGTCAGAGATCATTACTGAGCCGTCCGTCATATTATATATACCGTATATATAATCCAACTATCAATTTCTAGGATTAAGACTTCAGAGCGAGTCCGACATCACACTCCTATTGGGCAACTCACTAATATCAACTGTCGGGGACCAAGGGAGACACTTCAGATCGTTAGCACAGTCCACGATAAGACACAGCTAGAAGCAACGAGGGTTGGATTTACTCGTCACAACCATGTTAACCACAGAGAACAATTTACAAGGTCTTCCTTCTCCAGATCTACCAAAACCCGAAGCCTGTCAAAGTCCAAACACGCCAAAGAATATGTCGGACGGGGAAAAGGAAGAGAAAAACATTTCTCGACCTAAACTCTCGTTCTCTATAGACGAGATAATGCGCAAACC…	MLTTENNLQGLPSPDLPKPEACQSPNTPKNMSDGEKEEKNISRPKLSFSIDEIMRKPDVKRSDTSERENNHISSQKRQKLSPNDVSPSSHGFQPYVSGLQKSPIVPLNTDPYPGMPSALSHPAYHGLGQLASFPTMVLAQRINEYQALKYHMDMQQRDAHLMATSTKMAHLTQIARAPLISPVSLGNLTSPRTARPNANQHSPVDDRRRDVLESSRGEDETLDLSMKKLDSQSAVSSTNMISPCSSSGDKTPEGESPVNKQQKTFPCHECGKVFNAHYNLTRHMPVHTGARPFVCKVCGKGFRQASTLCRHKIIHTNDKPHKCSQCGKAFNRSSTLNTHMRIHQNYKPYICEFCGKGFHQKGNYKNHKLTHSSEKQYKCKICDKAFHQVYNLTFHMHTH…	18.7786	9.66362	2340.76	2292.63	1135.46	1282.76	698.621	705.317	475.058	445.514	644.513	567.215	730.848
OFUSG25540.1	384.12	7.30645	0.623069	11.5868	4.80807e-31	5.03358e-29	LIM3, ISOFORM G	LHX3_CHICK^LHX3_CHICK^Q:249-1289,H:25-391^52.8%ID^E:1.23e-116^RecName: Full=LIM/homeobox protein Lhx3;^Eukaryota; Metazoa; Chordata; Craniata; Vertebrata; Euteleostomi; Archelosauria; Archosauria; Dinosauria; Saurischia; Theropoda; Coelurosauria; Aves; Neognathae; Galloanserae; Galliformes; Phasianidae; Phasianinae; Gallus	LHX3_CHICK^LHX3_CHICK^Q:249-1289,H:25-391^52.8%ID^E:1.23e-116^RecName: Full=LIM/homeobox protein Lhx3;^Eukaryota; Metazoa; Chordata; Craniata; Vertebrata; Euteleostomi; Archelosauria; Archosauria; Dinosauria; Saurischia; Theropoda; Coelurosauria; Aves; Neognathae; Galloanserae; Galliformes; Phasianidae; Phasianinae; Gallus	PF00412.23^LIM^LIM domain^28-83^E:5.7e-15`PF00412.23^LIM^LIM domain^87-144^E:6e-17`PF00046.30^Homeodomain^Homeodomain^160-216^E:8e-21`PF05920.12^Homeobox_KN^Homeobox KN domain^182-212^E:0.00041	.	.	KEGG:gga:373940`KO:K09374	PTHR24208:SF128	GO:0005623^cellular_component^obsolete cell`GO:0005634^cellular_component^nucleus`GO:0005667^cellular_component^transcription regulator complex`GO:0001228^molecular_function^DNA-binding transcription activator activity, RNA polymerase II-specific`GO:0000981^molecular_function^DNA-binding transcription factor activity, RNA polymerase II-specific`GO:0046872^molecular_function^metal ion binding`GO:0…	GO:0005623^cellular_component^obsolete cell`GO:0005634^cellular_component^nucleus`GO:0005667^cellular_component^transcription regulator complex`GO:0001228^molecular_function^DNA-binding transcription activator activity, RNA polymerase II-specific`GO:0000981^molecular_function^DNA-binding transcription factor activity, RNA polymerase II-specific`GO:0046872^molecular_function^metal ion binding`GO:0…	GO:0003677^molecular_function^DNA binding`GO:0006355^biological_process^regulation of transcription, DNA-templated	AGATTAACTACGAACCTTTACTATACGGAGCATCAACCACCAATACCTGTTTAACACAGAGACGCTATCACTGCCGCTACACAACCCCGCTATTAAGAAATATTGTCCTCGGATCCAAGAGTACGTTGAGGATTACGAAGTGCGGACACCTCGGATTTATTTCACAAATTATCTAGATGATGATGAAAGATCGGCTCAAGGATCTTTGTATAGAAAATGATATTTATAATGGAGACATTACAGCAGCAATACCAAAGTGTGCAGGTTGTGGGGACCCTATCCTGGACAGGTTTATCCTAAAGGTGTTGGACAGGAACTGGCACTCGAAATGTTTACAATGCAGCGATTGCTCGGCACCCCTCAGTGACAAATGCTTCTCGAAGGGCGACAGTGTTTTCT…	MMMKDRLKDLCIENDIYNGDITAAIPKCAGCGDPILDRFILKVLDRNWHSKCLQCSDCSAPLSDKCFSKGDSVFCKEDFFRRFGTKCARCDQGIPPTQVVRRAQDYVYHLNCFACELCKHELNTGDEFYLMEDRKLVCKNDYEAAKARGELEFDLDAANKRPRTTITAKQLENLKRAYNESPKPARHVREQLSAETGLDMRVVQVWFQNRRAKEKRLKKDAGRNRWNPYYRQMKGGKDLDDLTSEDGTNDDCHVDLSYQNELDCMESPLSADMYGSQPLDSEPSMGSVPIPSGAPHPDGTWLPGHYPGMPANMNIPYGRRSPNIPMSMPQMIHSDGMPMMLVNNGPMSLREHNENDYTPDYPPGSTNDHIEAY	6.25878	10.7399	2043.25	990.97	2119.71	1470.12	828.89	856.28	183.258	282.244	445.479	531.15	601.752
OFUSG23194.1	5747.14	7.30186	0.402571	18.1224	2.12005e-73	3.49895e-70	TRANSMEMBRANE PROTEIN	.	.	.	.	.	.	PTHR14948:SF25	.	.	.	CCATCAATACACTCTGGTCTTGTATTCCCCATCCAATTTGAGACTGGAAGATATGAACACCTATACAATGGAGAACTTGTGGAGAATGAACAACGTAGCCTGACTTTTAATTTTATATTTTCTCCAACTGCGATTCTTGAATACGGTCAATAATTAAAGTCGATACGGATAGGTATTTATTCATTTAAAGGTTTATGTTCGTCTACAAAGGCTCGCCACCCATTGAACTAGACATATATCGATTGGCCAAGGTAAACAGTACGCGGCCGAAAAGGTGCATGAAACACACGAATAAACCTTAAAAGCCACGCCCAACAGTGCATGATTCAGCACATAAGACTATTAAAGGATTTTTGTATTTTTCCATTGCTCACACAATTTTGCAATCAAACTGCTTAG…	MDKYGRPVDHTEVHIQQQPPTYMAQTKQSWSWCSIVTSTISLCCCSLMGGIGLLCAVLSYTDHKVGDYERHKTKRCWSLCCSISAIVIGCLAIAAILVLVFAFPGIIYGYASAINIRNPYAG	214.398	59.3375	29589.7	14700.9	30503.2	19787.8	16116	11295.3	9108.66	7024.03	5988.32	4512.2	5727.66
OFUSG10697.1	47.0888	7.25791	1.32955	5.00578	5.56369e-07	4.76497e-06	SI:DKEYP-2E4.2-RELATED	ZN667_HUMAN^ZN667_HUMAN^Q:1479-1835,H:383-503^36.066%ID^E:1.73e-11^RecName: Full=Zinc finger protein 667;^Eukaryota; Metazoa; Chordata; Craniata; Vertebrata; Euteleostomi; Mammalia; Eutheria; Euarchontoglires; Primates; Haplorrhini; Catarrhini; Hominidae; Homo`ZN667_HUMAN^ZN667_HUMAN^Q:1452-1805,H:459-577^33.058%ID^E:6.39e-08^RecName: Full=Zinc finger protein 667;^Eukaryota; Metazoa; Chordata; Cr…	ZN667_HUMAN^ZN667_HUMAN^Q:1479-1835,H:383-503^36.066%ID^E:1.73e-11^RecName: Full=Zinc finger protein 667;^Eukaryota; Metazoa; Chordata; Craniata; Vertebrata; Euteleostomi; Mammalia; Eutheria; Euarchontoglires; Primates; Haplorrhini; Catarrhini; Hominidae; Homo`ZN667_HUMAN^ZN667_HUMAN^Q:1452-1805,H:459-577^33.058%ID^E:6.39e-08^RecName: Full=Zinc finger protein 667;^Eukaryota; Metazoa; Chordata; Cr…	PF00096.27^zf-C2H2^Zinc finger, C2H2 type^360-383^E:0.002`PF00096.27^zf-C2H2^Zinc finger, C2H2 type^415-437^E:0.0015`PF00096.27^zf-C2H2^Zinc finger, C2H2 type^443-465^E:0.0018	.	.	KEGG:hsa:63934`KO:K09228	PTHR24406:SF11	GO:0005634^cellular_component^nucleus`GO:0003677^molecular_function^DNA binding`GO:0046872^molecular_function^metal ion binding`GO:0006355^biological_process^regulation of transcription, DNA-templated	GO:0005634^cellular_component^nucleus`GO:0003677^molecular_function^DNA binding`GO:0046872^molecular_function^metal ion binding`GO:0006355^biological_process^regulation of transcription, DNA-templated	GO:0003676^molecular_function^nucleic acid binding	CTTGATTTTAAACCGAATTCCTTTGAAACAAATTGTGGATAGTTGAAAAATGCTATATTAGAATATTTTGTAATGCATTACATGTAACGCACGGATTTGAATGACTCGTGGCTTGAGGTGAGGACTAATACCCGATATTACATGCTATTCGGCCGTATTGCCCCCTAACCGAAGACATATGGTACACAACATTGTTGATGGATCGCATGTATGCCATGCACGTTCTACGAACTACTATAATTATTTGTCAATCAAAATTTGACTTTAAATACAATGAGGAAGTGAGCCCCATCATTTTGGATTCGGAGTCGAACCAATAAACTCATCGGGAAAAAGTGATCCGCATAGGGCTTTGAATACTTCAATAAAGATTACTTTGAGCTATTACAAAAGATTTTA…	MAAFSHDTDTIYSIASILCNDLHQPRHLSETSVGTQHNYDSGHVSPPNTSSASYQVNFTITDLDYCSNGRHWLQAKPANDAQNDNFATLVSRQNCMGTEMAQQPPTRYVHPFRGQPQQNLPSISSKKSSTLIVPLPLYPEEVLHYRGLGKAMFPSSHAAQQLSAAPSYHLMGYEERGIIGNTPTRSTANAYKHSKQIIAPSAPSSSVIASTNIQQLPKEHDANTNNVETVNGTHRIKSDSMGDVPNGSKMPELTTISLNLEEHRKDSASSSSVVASSECMTLSTLNVSPTVSTSSLSSSSSYSPSSFHTSSPSSSGTCSPSAPVECSPSATSSMPSSTDSSPPKHDGLDFKKFLTDKKTYTCPKCPYVTDRKNNLKRHVVTMHEKCDKALECCNTAFAN…	0	2.14697	484.126	204.424	28.5635	133.355	49.217	25.195	4.29033	45.1342	72.6899	83.555	123.133
OFUSG15959.1	1255.17	7.25196	0.4937	14.3334	1.35232e-46	4.03639e-44	REGULATOR OF G-PROTEIN SIGNALING 22	RGS22_HUMAN^RGS22_HUMAN^Q:2960-4918,H:572-1225^39.344%ID^E:3.54e-148^RecName: Full=Regulator of G-protein signaling 22;^Eukaryota; Metazoa; Chordata; Craniata; Vertebrata; Euteleostomi; Mammalia; Eutheria; Euarchontoglires; Primates; Haplorrhini; Catarrhini; Hominidae; Homo`RGS22_HUMAN^RGS22_HUMAN^Q:614-1228,H:18-214^38.35%ID^E:7.93e-30^RecName: Full=Regulator of G-protein signaling 22;^Eukaryota…	RGS22_HUMAN^RGS22_HUMAN^Q:2960-4918,H:572-1225^39.344%ID^E:3.54e-148^RecName: Full=Regulator of G-protein signaling 22;^Eukaryota; Metazoa; Chordata; Craniata; Vertebrata; Euteleostomi; Mammalia; Eutheria; Euarchontoglires; Primates; Haplorrhini; Catarrhini; Hominidae; Homo`RGS22_HUMAN^RGS22_HUMAN^Q:614-1228,H:18-214^38.35%ID^E:7.93e-30^RecName: Full=Regulator of G-protein signaling 22;^Eukaryota…	PF00615.20^RGS^Regulator of G protein signaling domain^1059-1183^E:3e-06`PF00615.20^RGS^Regulator of G protein signaling domain^1228-1334^E:2.3e-08	.	.	KEGG:hsa:26166	PTHR46583	GO:0005737^cellular_component^cytoplasm`GO:0005634^cellular_component^nucleus`GO:0001965^molecular_function^G-protein alpha-subunit binding`GO:0009968^biological_process^negative regulation of signal transduction	GO:0005737^cellular_component^cytoplasm`GO:0005634^cellular_component^nucleus`GO:0001965^molecular_function^G-protein alpha-subunit binding`GO:0009968^biological_process^negative regulation of signal transduction	.	CTGTTAATGAGATTGACATATATTGGAAGGTGATGGTGTATTTCACTGGATAATGTTAGGTATGATGTTTCCACTCTCAAAATATCGGATTATTGGAAAGACTGGTAATTTTGTACAAAAGTGGAAATTATGCAGCAGAATTCAATGACATAAATGAGGAAATGTCATTGTGGGACAATTCCCTTCTAAAGACCCTGCTCTTAAACCGCCATATTCCATTATCGGTGTGCATTATTTGTATTTATATTACAACAAAGCCGCTTATAGGATTTCTAAAAAGTTTGTATAGTGATATTAAATGGTGTACAGCAGTCATGTATAAGTCAATCGTGTTGCGCTATAGAATTGAGAATAAACACTTTAAGTAAATATGAAAACTTTATTGCCTTTGTAAAGGAC…	MAVFIEEGKRFEELLATDNLFVEYFNSFLALPTFPDALLFNKETKGFEVANDARKRISKEIKTAIRESKRKSRIYRVSKHHSFSDITLIPMEDEPWQESREIETSFTVMTLNKEQGIEWIKKERLPMFLESEYYLEYRLATILSQVKLKQEQNTGDYNVIKIDFTPITNDEKSAEEIAREEDERLTNQIMKECFVCMGDTPNTTTDAWMSQAKSTVKAELSTTPSTTGGIISAKHSSVARPKSTSSLFDRQLQSTTESGYESANIDLTSITSDIEAMDSKLFEGESLKPITPRPSETVCVINSASNENLSKPLSTGVAYATNGKQEDEPRPEDQVTAVISDDTSVDADDVHRRSVGFAVEDDIKSDSAESEMSIPYTGSDRSSALDEDLYTFRTISDLG…	13.5784	0	1093.48	1126.7	2978.38	2862.54	3379.03	3155.29	3565.5	2952.21	5398.86	5141.03	2203.2
OFUSG25685.1	450.716	7.24394	1.05019	5.41431	6.15268e-08	6.2118e-07	GH11818P-RELATED	ST1B1_BOVIN^ST1B1_BOVIN^Q:363-998,H:98-295^35.849%ID^E:1.52e-37^RecName: Full=Sulfotransferase family cytosolic 1B member 1;^Eukaryota; Metazoa; Chordata; Craniata; Vertebrata; Euteleostomi; Mammalia; Eutheria; Laurasiatheria; Artiodactyla; Ruminantia; Pecora; Bovidae; Bovinae; Bos`ST1B1_BOVIN^ST1B1_BOVIN^Q:145-249,H:37-71^48.571%ID^E:1.52e-37^RecName: Full=Sulfotransferase family cytosolic 1B me…	ST1B1_BOVIN^ST1B1_BOVIN^Q:363-998,H:98-295^35.849%ID^E:1.52e-37^RecName: Full=Sulfotransferase family cytosolic 1B member 1;^Eukaryota; Metazoa; Chordata; Craniata; Vertebrata; Euteleostomi; Mammalia; Eutheria; Laurasiatheria; Artiodactyla; Ruminantia; Pecora; Bovidae; Bovinae; Bos`ST1B1_BOVIN^ST1B1_BOVIN^Q:145-249,H:37-71^48.571%ID^E:1.52e-37^RecName: Full=Sulfotransferase family cytosolic 1B me…	PF00685.28^Sulfotransfer_1^Sulfotransferase domain^13-230^E:9.4e-43	.	.	KEGG:bta:521920`KO:K01025	PTHR11783:SF180	GO:0005737^cellular_component^cytoplasm`GO:0004062^molecular_function^aryl sulfotransferase activity`GO:0050427^biological_process^3'-phosphoadenosine 5'-phosphosulfate metabolic process`GO:0030855^biological_process^epithelial cell differentiation`GO:0006068^biological_process^ethanol catabolic process`GO:0009812^biological_process^flavonoid metabolic process`GO:0008202^biological_process^steroi…	GO:0005737^cellular_component^cytoplasm`GO:0004062^molecular_function^aryl sulfotransferase activity`GO:0050427^biological_process^3'-phosphoadenosine 5'-phosphosulfate metabolic process`GO:0030855^biological_process^epithelial cell differentiation`GO:0006068^biological_process^ethanol catabolic process`GO:0009812^biological_process^flavonoid metabolic process`GO:0008202^biological_process^steroi…	GO:0008146^molecular_function^sulfotransferase activity	ATGGCAAAACCGATGCAGCTCTGGGATTGTTTCAAAGATGAATTTAAAGCAGAGGAAAAGTTCAAAATTGTTAATGGGATGAGCTTTAGTCCGGAGATAACACATACTGAATCTGTAAAGAGTATGAACGCATATGACAAGATGCGAGATGATGATGTCATAGTATCTTCCTATCCAAGGTCTGGAACTCATTGGAGCATAGCATTGGTAGACCTAGTGATGCATGGTGGGGATATAGAATCTGTCAAAGATAGACATATACATGAGAGAAGCATTTGGATATTCCAATGCCAATGCTTGCTGGAAAGGTTGAGATGAGTATAGAAAATATAGAGAAACAAGAAAACCCCATGGTTGCTGCGGAGAGTGCACCATCGCCTCGTCTCCTCTCAACACATC…	MPMLAGKVEMSIENIEKQENPMVAAESAPSPRLLSTHLTYDFMPESVKQGKCKVVVILRNPKSVVTSLHVLNDVPEYYKVVPTIDQTIDAMLTDAQDQLIYGSWFNHVSKWWLNKDKLKGNIHFIFYEDMKKNMGEVIKGLAKFLNKSIPDDHIDKMAEHLQFEQMLKNPKTGKAFENIKVTDETMDLMETDAYKASHMRKGVIDDWKTKMTAAQSKRIDAFYGPRLEKIGLKFQYE	1.04069	0	203.825	159.822	588.101	537.786	1674.83	1538	3257.33	2551.69	471.719	956.219	184.843
OFUSG17428.1	764.735	7.22797	0.673884	10.2059	1.86623e-24	1.14076e-22	ATILLA, ISOFORM B-RELATED-RELATED	.	.	.	sigP:1^21^0.779^YES	.	.	PTHR33562	.	.	.	TGGTATACAGAGGGCATACAAATTCTAGTGTCCAGTACCTGCCGTGACAATATCACAAGCTGTCACTCAGAACAGCTCGTGCACAAGTAATTATCTTACCAGAAATGGGCACGCCCATATATAAATTAAAACATGATAGAGTTATATAGCATTTTAATTAAGCGTTTATTTCATTGTTGTGATATATTGAATGCTTGGATATTTCAAAAATGGATATTTTTGTCATAACCTTGATCCTTTCCGGGATTTTTCTTTATGCTGGCATAGAAGCACAAAGAACATGTTATGTGTGCTCCGGACAGAGACCCGACAGGGAATGTGAAAACAACCCAACCGGTGTTGCCAATGGCTACGGTGGAAAAGTTGGATGTTCGAAGAGTTTCTGTACAACCCACGTAA…	MDIFVITLILSGIFLYAGIEAQRTCYVCSGQRPDRECENNPTGVANGYGGKVGCSKSFCTTHVRYVPRENLLDFGRNMGRYGRLDTMKGRPIATTRPLTINDYEISSIARSCDTIDRGNTCDRDWDGLGITCWTTCTSDGCNSDAPRRPSMELLTTYGPPKSTKQNDVIDYRGNYRESVDSGRKEGANARRKGADGRDYAMENDVSSKMTTESTPEVFMNTTEPNDTEELGDFDGQKNNALSLNCHIYLLAMIGLSLIFVIQ	3.12755	3.2258	729.75	393.4	2405.08	1332.6	3092.97	3190.6	3628.09	3642.4	919.427	1073.34	232.801
OFUSG22469.1	175.226	7.22636	1.10114	5.45267	4.96184e-08	5.0648e-07	SUBFAMILY NOT NAMED	CC44_CAEEL^CC44_CAEEL^Q:375-1784,H:28-486^38.205%ID^E:1.65e-101^RecName: Full=Probable cytochrome P450 CYP44;^Eukaryota; Metazoa; Ecdysozoa; Nematoda; Chromadorea; Rhabditida; Rhabditina; Rhabditomorpha; Rhabditoidea; Rhabditidae; Peloderinae; Caenorhabditis	CC44_CAEEL^CC44_CAEEL^Q:375-1784,H:28-486^38.205%ID^E:1.65e-101^RecName: Full=Probable cytochrome P450 CYP44;^Eukaryota; Metazoa; Ecdysozoa; Nematoda; Chromadorea; Rhabditida; Rhabditina; Rhabditomorpha; Rhabditoidea; Rhabditidae; Peloderinae; Caenorhabditis	PF00067.23^p450^Cytochrome P450^54-517^E:2.3e-84	.	.	KEGG:cel:CELE_ZK177.5	PTHR24291:SF48	GO:0020037^molecular_function^heme binding`GO:0005506^molecular_function^iron ion binding`GO:0004497^molecular_function^monooxygenase activity`GO:0016705^molecular_function^oxidoreductase activity, acting on paired donors, with incorporation or reduction of molecular oxygen`GO:0055114^biological_process^oxidation-reduction process	GO:0020037^molecular_function^heme binding`GO:0005506^molecular_function^iron ion binding`GO:0004497^molecular_function^monooxygenase activity`GO:0016705^molecular_function^oxidoreductase activity, acting on paired donors, with incorporation or reduction of molecular oxygen`GO:0055114^biological_process^oxidation-reduction process	GO:0005506^molecular_function^iron ion binding`GO:0016705^molecular_function^oxidoreductase activity, acting on paired donors, with incorporation or reduction of molecular oxygen`GO:0020037^molecular_function^heme binding`GO:0055114^biological_process^oxidation-reduction process	CGCCATTAACTTGACTGGAGAGCAAAAGATTAAAACAGTTTGATCAGCTGCGCGTGATGATTTAGAAAATGCAGGCTATTAATAAGTAAAACATACACTCAATTGGTAGTTAATTTTATGTTAACCTTGCTGGTGCTGTTTATGAACTCGATGCAGCTGCTATTCGTTTCATTACCAAAACAATAAGACATAGAACACTTATTATTGAAATACGGCTGTAGGTCATCTTGATAATGTTTTTGTCGGGCGTTAAACAACTAGGATTTCGGATGCAAATTGCTCGACTCGGGACTCTCACTGGTAAAGTTGAAACACACCAGGATGTAATAAAAACAGGGCATCGCGAGACCGATGTTGGACAGTACGAAAAAGCAAGGTCATTTGATACGATTCCCGGGC…	MFLSGVKQLGFRMQIARLGTLTGKVETHQDVIKTGHRETDVGQYEKARSFDTIPGPKGVPVFGTLFQYTRGPYSVDFYPDALVDRYYKYGPIFKETIAGKTIVHIFDPDEIKKLYATEGKNPHIPPLLETVKMYRKYRDMSPGLGNVNGEEWYRLRSSVQKLIMQPVSTAKFLPMVNEVVDDFITRIYKIRASMGEINNFNFELSKFVYESSTYTCFEKRQRILNDEKGSHTDKLISCNRAMLDLSTKLKFQLPFYKYINTPTWKKLVASEDFFYRFGQTLVDETVVKMNELSESGDLKNGQYVFLSYLLGKRELRYKDLSIVTLSMFNDGLSTTAPSLVWQLYCISKHPEKQEKLYEEVKDLSEKSEPISAKTLTRLPYLKACIKEGFRLFPIAPDVT…	1.0432	0	223.39	130.385	537.983	621.275	838.376	699.531	704.17	485.809	192.149	160.826	89.9564
OFUSG04525.1	746.044	7.22326	0.620808	10.998	3.90897e-28	3.26411e-26	AMINOPEPTIDASE	AMPN_BOVIN^AMPN_BOVIN^Q:505-3129,H:62-965^36.543%ID^E:0^RecName: Full=Aminopeptidase N {ECO:0000305};^Eukaryota; Metazoa; Chordata; Craniata; Vertebrata; Euteleostomi; Mammalia; Eutheria; Laurasiatheria; Artiodactyla; Ruminantia; Pecora; Bovidae; Bovinae; Bos	AMPN_BOVIN^AMPN_BOVIN^Q:505-3129,H:62-965^36.543%ID^E:0^RecName: Full=Aminopeptidase N {ECO:0000305};^Eukaryota; Metazoa; Chordata; Craniata; Vertebrata; Euteleostomi; Mammalia; Eutheria; Laurasiatheria; Artiodactyla; Ruminantia; Pecora; Bovidae; Bovinae; Bos	PF17900.2^Peptidase_M1_N^Peptidase M1 N-terminal domain^186-373^E:2.4e-49`PF01433.21^Peptidase_M1^Peptidase family M1 domain^408-627^E:1.2e-71`PF11838.9^ERAP1_C^ERAP1-like C-terminal domain^706-1022^E:7.8e-67	.	.	KEGG:bta:404191`KO:K11140	PTHR11533:SF246	GO:0005737^cellular_component^cytoplasm`GO:0016021^cellular_component^integral component of membrane`GO:0005886^cellular_component^plasma membrane`GO:0070006^molecular_function^metalloaminopeptidase activity`GO:0042277^molecular_function^peptide binding`GO:0001618^molecular_function^virus receptor activity`GO:0008270^molecular_function^zinc ion binding`GO:0001525^biological_process^angiogenesis`G…	GO:0005737^cellular_component^cytoplasm`GO:0016021^cellular_component^integral component of membrane`GO:0005886^cellular_component^plasma membrane`GO:0070006^molecular_function^metalloaminopeptidase activity`GO:0042277^molecular_function^peptide binding`GO:0001618^molecular_function^virus receptor activity`GO:0008270^molecular_function^zinc ion binding`GO:0001525^biological_process^angiogenesis`G…	GO:0008237^molecular_function^metallopeptidase activity`GO:0008270^molecular_function^zinc ion binding	atgggaatcctatcgtcggggtcaggggcaggatggcaggcaggcaggcaggcaggcgacaggcagacaaACATAGAGAGGCAGGCTTCACTAGATTTAGCTCAATCGATTGGCTATGATGATCGCGTTAGTTTGACAGGGCCACCTGATGCAGATGGAGGATGTACGCTTGACATCTTAATGTCGAACTGTAAGGGCATAATGGCAGATCAAGTTATGCTTAAAGGTGGGGATGACGGTGAAGCAGGGTATCCCCTCAAGGAATCGAACAATCTGACAAACTCAGGGCACGAAAACGGCGAAGTGAAAGTTAAAAGGCCACAGAAAGGATATCTCTTTACACGGAATCAACTGATACTATTCGTTGGATGTGTTTTAGCAATAATCATTTTGGTTGCA…	MGILSSGSGAGWQAGRQAGDRQTNIERQASLDLAQSIGYDDRVSLTGPPDADGGCTLDILMSNCKGIMADQVMLKGGDDGEAGYPLKESNNLTNSGHENGEVKVKRPQKGYLFTRNQLILFVGCVLAIIILVALLAGLIGRTRPNCPTADSELTESDPLVLNPTALPTIDPSLPWAKIRLPRKIIPLFYTLVIRVDLSSFIFNGSVTINVTCEEDTNLIILHTYKLNIDDSATVVRDSNNADLDIARTIRVPKNQFYVIELKEQLKTGASYKVIIGKYNGTLEDDLRGLYRSSYKNDNGTLRYLAASQLQSADARKVFPCFDEPDLKANFAVSIEHLKEYTALSNMPTHNIQRLGGGWLRANFLQSPVMSTYLLAFVISDFTSRQRISANGLKVRIWAN…	5.21945	1.0724	473.276	591.186	1082.91	1060.43	2231.42	2697.06	3215.82	2413.82	2500.83	1909.82	1959.29
OFUSG09590.1	13972.2	7.20188	0.867381	8.20524	2.30131e-16	6.80377e-15	HAL-LIKE PROTEIN DDB_G0273787/DDB_G0273081	PALY_RHOTO^PALY_RHOTO^Q:656-2446,H:45-715^32.987%ID^E:8.18e-104^RecName: Full=Phenylalanine/tyrosine ammonia-lyase;^Eukaryota; Fungi; Dikarya; Basidiomycota; Pucciniomycotina; Microbotryomycetes; Sporidiobolales; Sporidiobolaceae; Rhodotorula	PALY_RHOTO^PALY_RHOTO^Q:656-2446,H:45-715^32.987%ID^E:8.18e-104^RecName: Full=Phenylalanine/tyrosine ammonia-lyase;^Eukaryota; Fungi; Dikarya; Basidiomycota; Pucciniomycotina; Microbotryomycetes; Sporidiobolales; Sporidiobolaceae; Rhodotorula	PF00221.20^Lyase_aromatic^Aromatic amino acid lyase^35-481^E:1.1e-132	.	.	.	PTHR10362:SF35	GO:0005737^cellular_component^cytoplasm`GO:0045548^molecular_function^phenylalanine ammonia-lyase activity`GO:0052883^molecular_function^tyrosine ammonia-lyase activity`GO:0009800^biological_process^cinnamic acid biosynthetic process`GO:0006559^biological_process^L-phenylalanine catabolic process	GO:0005737^cellular_component^cytoplasm`GO:0045548^molecular_function^phenylalanine ammonia-lyase activity`GO:0052883^molecular_function^tyrosine ammonia-lyase activity`GO:0009800^biological_process^cinnamic acid biosynthetic process`GO:0006559^biological_process^L-phenylalanine catabolic process	.	AAAAATGATGGTTAAACTCAGAGTATTCAAAAGGAATGATTAATATTGCAAGGGTTCTGTTCCGTAAGATGTGCACTATCTGTAGTATCTTAGTTGTACTCGCACCATTTATCTTGTCGAACTATATTTAGAAGATCATGTGACAAAAATGGTTTATTTTTGGGAACTAACAAGATACAGTTCTATTCTGAGACAATTTATTTAATAAAACCGGATGGTACGACAAATCGAGATGACCCAAAACAATAATATTTTGATCATGCGGATGTAAAAACCACACCTCTGCGATATCGCGTGCAAGATAAAAATTCAATTGTCGTTGATATTTGTGTTTTGAAGTTATCTGTACCGATAGGCTTAATGTTGGAAGCCAGTTTTGTATTTCGTACTTATTCTGTA…	MGSACTETPHLDKSIDFIKSRIGQPDEIVIHGNGLTIPEVVSVSEDTTKRVRIDDSAHEEMKKNAEYLTEKIGEGLVVYGINTGFGGSADVRSWEIEEVQRSLIRHSKVGMATYFDNEVTRAGMLVRANSDSRAYSGIRNTVLQRMVDLINHDIVPRVPERGSVSASGDLNPLSYIGAAMCGQDDSWVVAQGKLMKSHEALTNAALEPVTLRFKEGLAIINSDSFSAGNAARCVYTANVNALLTQVCVAMAVEALQGRTETFDEKIQKRVPHVGQKEAASNIRRLIKGSRFARTSESNNVERQDRFALRSSPQWLSPILETLQDSMRRMKIEMNSSNDNPIIDHRTDTVLHGANFQGMTMSVAMDQTRQSMQLCGKLIFGLIQECINGKLNYDLPANVA…	171.141	34.3402	22462.9	18919.8	63089.2	52170.4	72083.2	70289.9	25590.5	24965.4	3380.66	20663.3	3357.24
OFUSG07742.1	7870.53	7.19134	0.76322	9.39853	5.53306e-21	2.55331e-19	ASPARTYL PROTEASE DDI-RELATED	DDI1_MACFA^DDI1_MACFA^Q:435-812,H:245-380^30.147%ID^E:1.37e-08^RecName: Full=Protein DDI1 homolog 1;^Eukaryota; Metazoa; Chordata; Craniata; Vertebrata; Euteleostomi; Mammalia; Eutheria; Euarchontoglires; Primates; Haplorrhini; Catarrhini; Cercopithecidae; Cercopithecinae; Macaca	DDI1_MACFA^DDI1_MACFA^Q:435-812,H:245-380^30.147%ID^E:1.37e-08^RecName: Full=Protein DDI1 homolog 1;^Eukaryota; Metazoa; Chordata; Craniata; Vertebrata; Euteleostomi; Mammalia; Eutheria; Euarchontoglires; Primates; Haplorrhini; Catarrhini; Cercopithecidae; Cercopithecinae; Macaca	PF09668.11^Asp_protease^Aspartyl protease^86-178^E:3.8e-06`PF13975.7^gag-asp_proteas^gag-polyprotein putative aspartyl protease^87-172^E:6.5e-07	.	.	KEGG:mcf:102146826`KO:K11885	PTHR12917	GO:0004190^molecular_function^aspartic-type endopeptidase activity`GO:0072711^biological_process^cellular response to hydroxyurea`GO:0010498^biological_process^proteasomal protein catabolic process`GO:0097752^biological_process^regulation of DNA stability`GO:0031647^biological_process^regulation of protein stability	GO:0004190^molecular_function^aspartic-type endopeptidase activity`GO:0072711^biological_process^cellular response to hydroxyurea`GO:0010498^biological_process^proteasomal protein catabolic process`GO:0097752^biological_process^regulation of DNA stability`GO:0031647^biological_process^regulation of protein stability	GO:0004190^molecular_function^aspartic-type endopeptidase activity`GO:0006508^biological_process^proteolysis	TGGCTATAAAGAGCGGATCATACCTATAGCAGGAGTCCATTGGAAAGATAACAAACCTTACCCTACGGATCGAGATGGCTTATGTAGACCTTCGTGCGTTTACCCCAAACTACTGAATGGACAATACATGTGTGGGGTATTCTGCAACAGAAATTTAAAATTATACACAAAAACCTAAGATGGATGATATTCTAGAAGAGGCCAATAGAAGGCAACAGCGTCGCTTAAAGACTCCATTGGGAAAGGAAGACCCCGATCTAGGTCTACAGGGGATGTCCATATCTCCCCGAAGTGCTAAAGGATCAAGAAATAACACAAGAGAGTCCCTTACCCCGACAGAACGTCCCCGAACTGGTAGAAGGAGAACCACAAGCCGGGAACAGGAACTTACTGGTTTGA…	MDDILEEANRRQQRRLKTPLGKEDPDLGLQGMSISPRSAKGSRNNTRESLTPTERPRTGRRRTTSREQELTGLTEDLEQKYPPLPFIKCKCNGRELKALLNTSSPFSTISTDAVKVCRLEKSTNNSLAVANGINTNGLVKNVQLEFAEKLSIDLYVHDDGPDLCLGLDFLKNMKCVINFQIGSITMNSKDITFLPEREIPLKYRNGKNVSASF	58.3642	44.1112	11096.8	7277.59	23450.6	20873.5	52940.7	36032.3	20714.2	18921.6	3532.96	14685.1	2794.12
OFUSG17427.1	224.94	7.17025	0.855135	7.11986	1.08033e-12	2.10931e-11	ATILLA, ISOFORM B-RELATED-RELATED	.	.	.	sigP:1^22^0.669^YES	.	.	PTHR33562	.	.	.	ATATTTAGAGCAAAATGATTCAACTTCAAAAACACAAGTGCGCCAACTGGCGCCTCGAGTCCTATTTTTCGTATAGAGACTCGCCATGATATATATATGCGTTTCCCGAGTATCATAACTTATGATAAACATTTCTATGCATTTAAATCATATTTATATCACCTATTTAATGTTTTTGATGTTCTGGTGTATTAACTTAAAATAAACCGTTGCAAAATTATTTCATCATCAGTTATTGTCTATAGATACTTCACATATGTTTCGTGTTACATATATGTTGACCATGTGTTGACAATCACTAATTATTAAAACATAATTGGATAAATTTTAACACACTATTAATAAATTACACATGGTGCATTCTTAATGTCTAAACAGACTGTTACGGAACATAAGAAT…	MKTLSLLNLTWMILSWSSELYGLTFDSKKCFACTYVQTNDPTATYECVADPENVKQGQPIVTCSFPDKAYCIIKRQMFISTGKLRSFSRGCDNVDRGNKCTRDHYFYTCYTTCTEDGCNGDTGITGDWGKGSGGKKSKYLPDIGSAPRIYDKRYMDKKKKSNGELSSKSQIHSGDKYSKKNELNGRSNGPQNSRKSGSCKNGISSFVVTVLFCLYTIL	1.04245	1.0754	229.097	178.445	722.131	504.89	1181.96	949.069	1002.44	879.592	176.328	187.249	59.0169
OFUSG21466.1	202.012	7.1208	0.910985	6.68555	2.30058e-11	3.81936e-10	ATILLA, ISOFORM B-RELATED-RELATED	.	.	.	sigP:1^20^0.817^YES	.	.	PTHR33562	.	.	.	ATGATGCGTTTGTTGTACCTCGTCATTTGGATATTGGCGTCTGAATACAAAGCGATGGGTTTGGAGTGGTGTTACCATTGCATCTATACGACGGAAACTATGGCAAATGATCGAGACTACGCATGCGTGACATCTCCATGGAGAATGGGTCAAGCGTCGTCCCAGATCCCCTGTATCTTCAGCAAATACTGTTCTACGTTCCGTCAAGTGGAAAAATCGACAGGGCGAATAGTGTCTTTCTCTAGAAACTGTGACAACAATTGGCGTGGCAACAACTGTATCCATGACAACCAATATGTTACGTGTTTTACGTCATGCACCACCGACTATTGCAACGACGGTAATGGAATTCCATCTAAGGAAGCACGCCAAAGAAAACAATCAATCATAATTAGAGAG…	MMRLLYLVIWILASEYKAMGLEWCYHCIYTTETMANDRDYACVTSPWRMGQASSQIPCIFSKYCSTFRQVEKSTGRIVSFSRNCDNNWRGNNCIHDNQYVTCFTSCTTDYCNDGNGIPSKEARQRKQSIIIREQTTLKPTLINRFMKFKPSKETTKPEQSRRENMNKSTNVSDLSNKSKVTRPSLEGEVSRQRVTKNHFGFRSMNRLPVAPQIPKSLYPFRNRNFNKTKDGAVSQKKATSPKLVTPGSKHVTPKEKTRDTLNRPLYLSPTTPVVRQTQDKRGNNIVLDGKRNGRGVFFSIDFPIVEGVNWCYHCIYTAEANVPNLDPTCIYKPQRVAYSKYPCNVKYCTTYKRTNIETGELASFSRQCEEHSRGNACSRDGEYEACFTACTEDGCNTGD…	2.08463	0	300.548	141.933	720.832	439.27	880.194	788.808	656.726	609.954	310.253	294.191	292.453
OFUSG25191.1	72.6034	7.10535	1.51596	4.12418	3.72054e-05	0.000224973	COLLAGEN ALPHA-4(VI) CHAIN	CO6A5_HUMAN^CO6A5_HUMAN^Q:165-1256,H:441-802^31.099%ID^E:2.77e-35^RecName: Full=Collagen alpha-5(VI) chain;^Eukaryota; Metazoa; Chordata; Craniata; Vertebrata; Euteleostomi; Mammalia; Eutheria; Euarchontoglires; Primates; Haplorrhini; Catarrhini; Hominidae; Homo`CO6A5_HUMAN^CO6A5_HUMAN^Q:150-1262,H:622-994^27.937%ID^E:8.73e-31^RecName: Full=Collagen alpha-5(VI) chain;^Eukaryota; Metazoa; Chordata…	CO6A5_HUMAN^CO6A5_HUMAN^Q:165-1256,H:441-802^31.099%ID^E:2.77e-35^RecName: Full=Collagen alpha-5(VI) chain;^Eukaryota; Metazoa; Chordata; Craniata; Vertebrata; Euteleostomi; Mammalia; Eutheria; Euarchontoglires; Primates; Haplorrhini; Catarrhini; Hominidae; Homo`CO6A5_HUMAN^CO6A5_HUMAN^Q:150-1262,H:622-994^27.937%ID^E:8.73e-31^RecName: Full=Collagen alpha-5(VI) chain;^Eukaryota; Metazoa; Chordata…	PF00092.29^VWA^von Willebrand factor type A domain^31-201^E:5.9e-43`PF13768.7^VWA_3^von Willebrand factor type A domain^31-182^E:6.2e-05`PF13519.7^VWA_2^von Willebrand factor type A domain^34-142^E:2.1e-14`PF00092.29^VWA^von Willebrand factor type A domain^220-386^E:2.4e-20`PF13768.7^VWA_3^von Willebrand factor type A domain^220-358^E:1	sigP:1^20^0.777^YES	.	KEGG:hsa:256076`KO:K06238	PTHR22588:SF6	GO:0005581^cellular_component^collagen trimer`GO:0062023^cellular_component^collagen-containing extracellular matrix`GO:0005576^cellular_component^extracellular region`GO:0030020^molecular_function^extracellular matrix structural constituent conferring tensile strength`GO:0007155^biological_process^cell adhesion	GO:0005581^cellular_component^collagen trimer`GO:0062023^cellular_component^collagen-containing extracellular matrix`GO:0005576^cellular_component^extracellular region`GO:0030020^molecular_function^extracellular matrix structural constituent conferring tensile strength`GO:0007155^biological_process^cell adhesion	.	TACACCATTAGATGTAGAGATTCTAAGAGAGAAGACTGTACATACAAGGCTCAAGGGGAAATTGGCAAGTTGCAAAAATGAGAGTCGCATTAGCATTAACTACACTAATCAACGTGCTCATAACAAATGCCCATGGCGTCGATGTATCATGTGGGAACAACCCAGCAGATATAGGGTTTGTGTTGGACTCATCTAGCAGCATTTGGCCTCCCCATTATTCAATGATGTTGGACTTTGTCAATTCATTCATTGATTCCTTTCAAATAGGCCCAGAGAAAGTACAGATAGCAGCCATCACGTATAGTGACCGTGTCCACAAGGAATTCTTTTTCAATGAGTTTACAGAAAAAGAACCTTTGAAAAACAGAGTATCCGCAATAACACAAAAATTGGGCGGGA…	MRVALALTTLINVLITNAHGVDVSCGNNPADIGFVLDSSSSIWPPHYSMMLDFVNSFIDSFQIGPEKVQIAAITYSDRVHKEFFFNEFTEKEPLKNRVSAITQKLGGTQTAQGIDFMRTKVFKHANGMRDGVPHIVIVITDGVSRRPEDTKEAAKKAKQEGLMVYAVGVGLKVDGNELADIASDPSYVFEVDNFDALNEIKEILAVKVCVKACGENRPADVVFLVDSYKSGDSHTKKSLDFVGNLSKQFEIGEDQIRVGLVQQCLIGGFPLSQYMSRDALEHDVKQVQIHDFADVMEHMTLRSFTVEEGSRPSAKKIAVAILDSAFPDEERVRIAADQAKEKDIEIFVVGVGAGASYRELTIVASSPFEDHIFEVESYDDLPDVTEKVKLNVCKDL	1.04167	0	399.439	179.57	190.269	211.709	76.296	39.9685	12.9718	15.3324	69.2006	1.34008	748.935
OFUSG09074.1	325.199	7.10031	0.883252	7.77625	7.47081e-15	1.83064e-13	BRAIN-SPECIFIC HOMEOBOX PROTEIN HOMOLOG	BSH_HUMAN^BSH_HUMAN^Q:373-879,H:8-178^55%ID^E:3.56e-47^RecName: Full=Brain-specific homeobox protein homolog;^Eukaryota; Metazoa; Chordata; Craniata; Vertebrata; Euteleostomi; Mammalia; Eutheria; Euarchontoglires; Primates; Haplorrhini; Catarrhini; Hominidae; Homo	BSH_HUMAN^BSH_HUMAN^Q:373-879,H:8-178^55%ID^E:3.56e-47^RecName: Full=Brain-specific homeobox protein homolog;^Eukaryota; Metazoa; Chordata; Craniata; Vertebrata; Euteleostomi; Mammalia; Eutheria; Euarchontoglires; Primates; Haplorrhini; Catarrhini; Hominidae; Homo	PF00046.30^Homeodomain^Homeodomain^104-160^E:2.6e-22	.	.	KEGG:hsa:390259	PTHR24327:SF35	GO:0000790^cellular_component^nuclear chromatin`GO:0005634^cellular_component^nucleus`GO:0005667^cellular_component^transcription regulator complex`GO:0003700^molecular_function^DNA-binding transcription factor activity`GO:0000981^molecular_function^DNA-binding transcription factor activity, RNA polymerase II-specific`GO:0000978^molecular_function^RNA polymerase II cis-regulatory region sequence-…	GO:0000790^cellular_component^nuclear chromatin`GO:0005634^cellular_component^nucleus`GO:0005667^cellular_component^transcription regulator complex`GO:0003700^molecular_function^DNA-binding transcription factor activity`GO:0000981^molecular_function^DNA-binding transcription factor activity, RNA polymerase II-specific`GO:0000978^molecular_function^RNA polymerase II cis-regulatory region sequence-…	GO:0003677^molecular_function^DNA binding	GTTCTACCATTCAATACAGGACATTTTAGAAGAAACACCATATTTGGCAGCTAGAAATTAAAAAAATGTCAACCGAAAAATAATCAATCAATGTAGATTAATTCTATAATTGCAACAAATGAGATGACTGGATTGATTGAAGGAGGGAACAGTGGGCGGCAAGCCATAGCATAGATGATGAAGGATTTGTCGCCCAGTAGGGGTACGTAAATGCAATCACTTCATCGTGAGGAGCATCGAATTAACATAAAACACAAGCCATCTCAATTTACAATGGATATATAAGTGAGATCCCTGCGCGATGTCACATTATTAGCGTAAGCCTTCAATGTGAAGAAGAAACTGAATTTGAAAAAGAAAATGAGCTTCGTGCCAAGAATCCCTGGGACTAATGGACAG…	MSFVPRIPGTNGQPRSSFLIDDILLSKPKSVIREVPVSVGVPRLSLTDYGYAYVPNPAFLQHPSIFAPHLASKTAEHSFLLPASGFPLHPVFPHDSPGKHCRRRKARTVFSDQQLNGLEKRFESQRYLSTPERVDLANQLSLSETQVKTWFQNRRMKHKKLNRKGAGGDRPEAGIDDNDDDDSNDAAEMEERLSEGESGENTPRDYSMTGSLCGYPHTQTQTATITAHRSGYHSNQSFHSNSTVAIDNEEINVVDTDDSPIVGVSLRVPKTIS	7.29489	0	772.997	546.918	2186.9	1286.08	953.402	895.985	453.06	386.405	705.703	342.876	200.788
OFUSG05963.1	21582.9	7.08618	0.674574	10.3423	4.53672e-25	2.98095e-23	SI:CH211-203K16.3	ANGL1_MOUSE^ANGL1_MOUSE^Q:1120-1749,H:282-489^33.641%ID^E:8.8e-32^RecName: Full=Angiopoietin-related protein 1;^Eukaryota; Metazoa; Chordata; Craniata; Vertebrata; Euteleostomi; Mammalia; Eutheria; Euarchontoglires; Glires; Rodentia; Myomorpha; Muroidea; Muridae; Murinae; Mus; Mus	ANGL1_MOUSE^ANGL1_MOUSE^Q:1120-1749,H:282-489^33.641%ID^E:8.8e-32^RecName: Full=Angiopoietin-related protein 1;^Eukaryota; Metazoa; Chordata; Craniata; Vertebrata; Euteleostomi; Mammalia; Eutheria; Euarchontoglires; Glires; Rodentia; Myomorpha; Muroidea; Muridae; Murinae; Mus; Mus	PF01146.18^Caveolin^Caveolin^5-106^E:3e-29`PF00147.19^Fibrinogen_C^Fibrinogen beta and gamma chains, C-terminal globular domain^400-582^E:1.2e-43	.	.	KEGG:mmu:72713	PTHR19143:SF394	GO:0062023^cellular_component^collagen-containing extracellular matrix`GO:0005615^cellular_component^extracellular space`GO:0005102^molecular_function^signaling receptor binding`GO:0001525^biological_process^angiogenesis`GO:0007169^biological_process^transmembrane receptor protein tyrosine kinase signaling pathway	GO:0062023^cellular_component^collagen-containing extracellular matrix`GO:0005615^cellular_component^extracellular space`GO:0005102^molecular_function^signaling receptor binding`GO:0001525^biological_process^angiogenesis`GO:0007169^biological_process^transmembrane receptor protein tyrosine kinase signaling pathway	GO:0070836^biological_process^caveola assembly	ATGTCTAGTGACGTCGTGGATTTATTGAACCGTGATCCCAAGAGCATCAATGCTCATCTTCAGGGAGTTGCCTTCGATGAATGCATCGCCGAACCCGATGCCGCCCATTCCATGGACTGCATCTGGTCCAACTCCTACAAATGCTTTGAATGCGGCAAAGGTCTCTGCTACAAACTTCTGACCTGTATGTGTGGTATTTGCATTGCCTTGTACTGGGGATGCACATTCGGAATTATCGCATTTGAGCACGTTTGGTGCATCACTCCCAACCTGAAGGTCCTCGACATCAACTGCAACATCTGCCAGAGGCTCTACGCGTGCCATAGTATACGGTTGGGCAAGAAACAAAGTGGTGGCGGTGGCCAGGGGATCGTACAAGGAGTCATTCAAGCTGAATTT…	MSSDVVDLLNRDPKSINAHLQGVAFDECIAEPDAAHSMDCIWSNSYKCFECGKGLCYKLLTCMCGICIALYWGCTFGIIAFEHVWCITPNLKVLDINCNICQRLYACHSIRLGKKQSGGGGQGIVQGVIQAEFGNLKEAIQLLIESQAALKTDLKEDSTSLRDEVSNLRDDVSNLRDDLSTLRDGESDKISSIRDELFNLRVDESDVRDNLVELKESMLEMRRQYSELSINDNTEKADTDDTETNVPLFVSEVCNKSSTMFQEIKDQLKGCQHDVLSTESDTSVLVKSEVCKMCNKSSRMFEAIQEQIKSFRHNSLETTENGKCNESITGIETLKEDLEMMIQEQMKKIVKTCQAGSDDQTNPELRNNVTISVAEDCSGQSDGVHIITTRTGKRFLARC…	15.6364	3.22637	2074.06	953.811	43209.6	22353.9	114936	74629	102531	79655.6	46381.9	86722.7	9055.35
OFUSG25320.1	167.751	7.07431	0.800371	8.22715	1.91717e-16	5.72234e-15	.	.	.	.	.	.	.	.	.	.	.	TGCATGGTTACTGGATGCACAGAGCTGATGTTAAAGGCCCGGGTATTTCTTACATTTTGTCTATTCTCTAACATGGTCAAAATATAGTCTGACAAAATCCTCGGCAAGATGATGCACACGAGAACATGATTTTTTCAAGGCGGCCTAGCAAGACAGCATATAACGTTAGGAATGGTTGTAGAATTATTTGCATATGGTGGAAGAACAGTGAACAGCATTAACCGGATGATTACACAACTACTTCACTGACTACATTTATACAGTCCTAGAACTGAAACCCCTCGACCTCAACGAGTGTGGATATTTAGATCTTTAAATCCATTATATGTGAAGCAAGTCGAAGAAAAAACTTTTCTTGAGAAAGTGCACTCAATTTAGCGTATAGATTTTGATATTCTA…	MAERALIREAMIRRSLRASHIRTRERNIGEKLTLDSKVRQLEKTLQRRRRKVDKEIDQVKTMLDKYHDNSSGSSDESDNDESNTAIRTPYHSLPCTPSSALRAGRDNSKMSSASAKSHVTFGRTSVQTINSEMLQYPETAELKSRQRKNRTCRFDSKTGECAHFPCTIPKHYNTLGYQIIPHQMLPLLTNSNSKSADLIRTDIIKTTAKARKALKKVVEDCELESVRRPLRCKIDQTDLKTEGLTKAMDHLRYQSIIQRPLGREAKYGEPFPRKQVLKAARAVRSDF	4.16883	0	375.623	301.626	368.333	456.211	419.474	352.041	429.889	280.004	839.036	395.174	305.097
OFUSG16342.1	797.687	7.07045	0.593853	11.4507	2.33196e-30	2.3038e-28	.	.	.	.	sigP:1^20^0.569^YES	.	.	.	.	.	.	GGTTGTGAGAACTGATTGGTTCTGGCAAGAGAGTGTTAATAAGTCGATGTCATATAGCGTCACGCAGTTACATCGAAGCTTATCAGAATAAAAGACAGCAACGAAACGCAAGGAACTTGGTACTGCGTCTCTTGAATTATCTTTCTAAACTTGTATATAAGACTGCTTGAACAAATAATAGTCAATTCAAAGGATATATTTAAGAAACTAATAATAAGGGCGGTCTTCGATTAAAAGAGGAATCTAAGCTGAACTAGCAGAGGAGGAAAAGCGAAAGATGCGCGCACCAGGACTAACGATAGCCACATTCTTTGCAGTTGCTTATCTATCCTATTCCGCTCCCCTAAATTCAGATGCCAAAAAGAGAAGCCGGGTTCAAGTAAGAAAGGTCAACGTTGA…	MRAPGLTIATFFAVAYLSYSAPLNSDAKKRSRVQVRKVNVDEIKGTQSDEEKPLLRVPKVREDQIEETEKLEKALLSEQHFTSIDGDSTGEGHNEEIELHNGDTVKDINQHSKTENGQTQVETEVNIPALGVHGTYQKTGSEEVPIIPEDDLTIDFSPKAVAEYLLATDDFSGFDAALEDLVNSSMMTSKEARAYKKQVINEFTRLMQTLQKSREREEALLASGNFQEDANVNEVNEKRSDIPKAEPDTSQNGIASKQIEVPSGVDVIENEQQEGESREDTVKDSGKFRTFDLNKAMIELKPEMREELTLGEMIEALRVDLLKTMLQTEDLKDVKITEADMQGLLDLVAEALLSDMSPREQVALSEGNIGDAETDVESELENIKGNNGPNTGSDNIVSE…	1.04297	7.52028	571.64	691.658	689.635	950.457	720.992	991.094	1584.63	1898.53	4634.04	4193.89	4594.92
OFUSG12691.1	320.37	7.06785	0.830192	7.10252	1.225e-12	2.37526e-11	PERIPHERAL MYELIN PROTEIN 22-LIKE	.	.	PF16954.6^HRG^Haem-transporter, endosomal/lysosomal, haem-responsive gene^130-175^E:0.014	.	.	.	PTHR10671:SF98	.	.	GO:0015232^molecular_function^heme transmembrane transporter activity`GO:0015886^biological_process^heme transport	CCGCAATGAATAACACATTCATTTGAATAACACACCTTGCCAATTAAATACTGAACTGTTTATAATTGAATATAATATCTAAAAGAAAATTATGATACATGAAAGCAAAAGGGCCTACAGTTATGGGCATGGATGCCGTATCGCAGGTGTTGTCATGGTTGGTGTATCCATGGGAATGGCAATAAGAAGTGTTTCACAACAAAGCTGGGCCAGAATTTCTTCATCCAACTCAACCCACCAATTGGACACGAGAATAGGATTATTTCAAATGTGCAACACAGTGAATGAAACGGACAGAGAATGTAAAAGTACACTTGACATGAATTTACCTCACGCACATACGGCTGCCATGGCTATGAACATGTGTGGAACAATCCTTATGGCCCTTACACTAATCTT…	MIHESKRAYSYGHGCRIAGVVMVGVSMGMAIRSVSQQSWARISSSNSTHQLDTRIGLFQMCNTVNETDRECKSTLDMNLPHAHTAAMAMNMCGTILMALTLILNGPIFCCVYGTKNPRVARYTTFALAAMALLAGVFMMLGFSLFGAFFETWIYTNQIHVTDATFLDESFYLMTVAALIGFIGALCMRISAQSLEGENTCPITATPANYANPPQAMTTFGAPPVTGYSTQSMTYPTQTTGHPGQPTAYSVPVTQYPGQSNQAYSK	0	2.15785	182.196	248.605	351.522	301.709	722.079	785.594	2142.15	1859.8	648.95	787.148	542.158
OFUSG04577.1	818.256	7.04346	0.512098	13.6838	1.26959e-42	2.91974e-40	SI:CH211-67E16.11	.	.	.	sigP:1^40^0.564^YES	.	.	PTHR35842	.	.	.	CTCGGCTCGTGGGGACGTATTTGTTTTTATTCATGGGGTTTGATTTATATGCGGTACTCGCCTTTTATCTGCAACTTCAAAAGTTTTGAGTTGGTTTATTCGCCTAGCCATAGAATCAACACCGATTTTACCAGATTCCTTTCATATGTGTTTAGTTTTACCTTCAAGAGACTGTAGCTATGTCAAAGGGATCTGATCCACAACGTATATGTTATACGGCTAAGAGAGGAGGCACACGCTCAATCATGAAGCTGCGAATTGACTGGTTACTACTGTGTAGTATACACTTATGTTTTGCGCTGAGTCTTGTACACCATCCAACACACGACAATACAACGTATGAAGCTAGCACGGACCCTCAGCAGCCCGCCAACACAAAGCAGATCAGATGGTCAGAAA…	MSKGSDPQRICYTAKRGGTRSIMKLRIDWLLLCSIHLCFALSLVHHPTHDNTTYEASTDPQQPANTKQIRWSENVFSYVHSLNCQDVFFTTQRQCEIITQLQRHEVNIYMADPTGRGDLFAITPDGGLSKAGGHDGVIVFDPYPSANFGHLVIVFFLDLDSNRMVCQNEGGTYIGNGECLTLALKKRCKNALEKRRRRNYAKRCEINFLPRVFLEHERETTAQRLTCRSNIPGFGVCPQMRSINETADLICNPLRDNTIRCETTHETTRTSCRPFEICDQAMIISGGWNRQISLPRHKRNILNVYNMLRNNGFRKKHVKVFFANGIDGTEVTGEESQDIHPAAMKLAMRYHLQRMCTSLHCVESLVLYLNSPATADGSSLLWDVDKNGIASENERYTVE…	17.7325	23.6298	3254.88	2689.25	1142	1694.5	1232.26	1072.56	1095.47	905.243	3540.21	2145.11	3109.11
OFUSG13715.1	420.667	7.02778	0.951737	5.57637	2.45585e-08	2.62891e-07	SUBFAMILY NOT NAMED	ANR63_HUMAN^ANR63_HUMAN^Q:399-845,H:18-166^30.719%ID^E:7.79e-13^RecName: Full=Ankyrin repeat domain-containing protein 63 {ECO:0000312|HGNC:HGNC:40027};^Eukaryota; Metazoa; Chordata; Craniata; Vertebrata; Euteleostomi; Mammalia; Eutheria; Euarchontoglires; Primates; Haplorrhini; Catarrhini; Hominidae; Homo	ANR63_HUMAN^ANR63_HUMAN^Q:399-845,H:18-166^30.719%ID^E:7.79e-13^RecName: Full=Ankyrin repeat domain-containing protein 63 {ECO:0000312|HGNC:HGNC:40027};^Eukaryota; Metazoa; Chordata; Craniata; Vertebrata; Euteleostomi; Mammalia; Eutheria; Euarchontoglires; Primates; Haplorrhini; Catarrhini; Hominidae; Homo	PF13637.7^Ank_4^Ankyrin repeats (many copies)^51-87^E:4.2e-05`PF12796.8^Ank_2^Ankyrin repeats (3 copies)^53-149^E:6e-10`PF12796.8^Ank_2^Ankyrin repeats (3 copies)^99-174^E:7.8e-11`PF13637.7^Ank_4^Ankyrin repeats (many copies)^120-174^E:1.2e-08`PF12796.8^Ank_2^Ankyrin repeats (3 copies)^124-206^E:9.9e-11`PF13857.7^Ank_5^Ankyrin repeats (many copies)^140-195^E:2.8e-09`PF13606.7^Ank_3^Ankyrin repeat…	.	.	KEGG:hsa:100131244	PTHR24173:SF76	.	.	GO:0005515^molecular_function^protein binding	TTGATCAATTCGACTTAGCAGGTCGTGATCTCTAAAGTTAAGTGAAAGCCCGTCGCTAAGAGACTTTAACCAAACAATCGTTCGTCTGAATGCTCCCGAATAAACGCAAGGTACGATTTGTTCAATAGAAGCATTCATCAAATATAACAAACTTATTCTTGATGTATTGTTATCTGACAAAGATATGCCAGTGGTATAAATAGCTTATAAGAGGATTTACTACCTAGCAAGCCGCCATGTTAGTTTTTCAAAACAAACTCGAAAACTCGAATAACCTTCACACGATACGAGAAGAATTTCCTCCAAAAATGGATGATACTGGAGAACCAGGGAGGACAACGATCGCTGTTGCCAATAAACTTGTTCATCCCAAGCGTCCGATGAAAACGGCACTCCATC…	MLVFQNKLENSNNLHTIREEFPPKMDDTGEPGRTTIAVANKLVHPKRPMKTALHQAVLDGRLHQVRLLVNKHGANVDSKDYYGRTAFMLTTFLDNVEYGLKMAKVLLKAGAFLNLKDNMNRSALSYACMKGRAEILKKLLKEDILDINDPDNDGNSPLHHAVLCGDPEVVRILVNVIVKFGLPVDIRNNIGYTPLLLSCKYGHYASAYHILTLASPSPTLRDNEFYLNAKEWVQKSYEIRMQQEFRKSRSQTMPCRLPLDSLLRESTQGNLKRGNTSMTMYQRSWTPQCNHVKGQTDPFASALNADFRLPSILPSFSIAGDESLEATIDGQNSRDALMLALEDSVEQQDSANTRSISRSLSVRSRSSITTAKLRQLGRSKTSLVPLDLGTLFKMYSEQH…	0	1.07537	131.748	118.962	767.784	620.262	1409.12	1009.7	1624.17	1258.5	2179.97	1893.2	340.672
OFUSG05281.1	454.757	7.00683	1.05715	5.25345	1.49275e-07	1.41255e-06	.	.	.	.	.	.	.	.	.	.	.	TATAAAATAATCACAAAAGTTAACATACGTATTCGTATTATGTTACCAGTTTATGTTGTATTTATGTCCAATATCAAGCAAGTACCTGGTTCGCATGTTTATACATACTAAGCTCCGAGCTGAGCTTATACACGATTTGTTTGAGGCAAGGGACATATAAAAATCTGCCAAGTTTACTAGCTAGTTAAACTTCTATATAAAGATATTGTGAGATTTTAACACGCCAATTTGGATAACTTGTGTCAGGTGTTATCTTATGATATACGGATATGTCTGATATTGAAGCCGTCGGAAAAGATAGCAGCGAGGAAAAGGACACAGGGTGTTCTGATGAGCCAGTGATTACTGTGGAGGAAACGCCAAGAGAACAAGGTGGTCCTGGCGAAGTGGATGATCAGG…	MSDIEAVGKDSSEEKDTGCSDEPVITVEETPREQGGPGEVDDQAQQKSVDAKGPVFEKPFASSTPTLSPATSSRDLSSSYRYKRSYNPMPSYSSSSSRWRSESVMDRIQARATAILDRDMALDRKAKLDGAMEPTSYSATYAKDDDVEYGGHRHSSRYKPQYRLDSRTYRDSTTGSSSYTRPSSYSRKYYADDNDTEQTSSTYSSRYRSRDTDYASSGSIRSSHSSIGGYYKLKSLLNDEKPSITRRVNTSEITNPKLRGYLKEVENIDAKIAAAMPRAQREYPERSDMYLVTYKEKYVPVNGAGVTEAELEPIRIKSENENITPLISDRGSLYKVGSSDGISDRRVRFGEDDNSSTGSIYLDSVRQSLSRERVRTPVADDDGDEYTTKPFRSRFLQAS…	1.04324	0	147.715	149.158	654.528	866.819	1392.5	1442.65	2355.44	1775.3	1657.12	1265.47	544.245
OFUSG24845.1	162.344	6.98879	0.820807	8.38036	5.27677e-17	1.67289e-15	METALLOPHOSPHOESTERASE YNL217W-RELATED	YNV7_YEAST^YNV7_YEAST^Q:149-793,H:53-305^22.846%ID^E:1.23e-07^RecName: Full=Putative metallophosphoesterase YNL217W;^Eukaryota; Fungi; Dikarya; Ascomycota; Saccharomycotina; Saccharomycetes; Saccharomycetales; Saccharomycetaceae; Saccharomyces	YNV7_YEAST^YNV7_YEAST^Q:149-793,H:53-305^22.846%ID^E:1.23e-07^RecName: Full=Putative metallophosphoesterase YNL217W;^Eukaryota; Fungi; Dikarya; Ascomycota; Saccharomycotina; Saccharomycetes; Saccharomycetales; Saccharomycetaceae; Saccharomyces	PF00149.29^Metallophos^Calcineurin-like phosphoesterase^39-209^E:1.9e-12	sigP:1^18^0.852^YES	.	KEGG:sce:YNL217W	PTHR42850:SF4	GO:0000324^cellular_component^fungal-type vacuole`GO:0000329^cellular_component^fungal-type vacuole membrane`GO:0005775^cellular_component^vacuolar lumen`GO:0000298^molecular_function^endopolyphosphatase activity`GO:0006798^biological_process^polyphosphate catabolic process	GO:0000324^cellular_component^fungal-type vacuole`GO:0000329^cellular_component^fungal-type vacuole membrane`GO:0005775^cellular_component^vacuolar lumen`GO:0000298^molecular_function^endopolyphosphatase activity`GO:0006798^biological_process^polyphosphate catabolic process	GO:0016787^molecular_function^hydrolase activity	AGACAAGGTCGCGGGTACGGCACTTCTTGGTTAAATCGATCTGCTTGAGTTTGTTCTTACGATGTTGGCCACCTTCGCTTTGTCATTCCTAGCTGTAGTTAGCCTGACGTTCAGCCAAAACATATATCCAGATGTTTGGCATGCTATCATCGATGAAGCCACTGTTGGAAACAAACGAGTATTCGTCACTGGTGACGTCCATGGAAATCTGCGTCCTTTCATGACGCTAATGCAGCAAGCAAATCTTCTCTCCCCAGATGGCAACACTATCGCCGACGATGCTATTGTTATCACATGTGGAGATCTCGTCCATAGAGGGCCACAAAGTCTCGAATTTGTGAGACTAATTAGAGACACGCCTAACCTGTACGCAGTGAGAGGGAACAATGACGACAAGCA…	MLATFALSFLAVVSLTFSQNIYPDVWHAIIDEATVGNKRVFVTGDVHGNLRPFMTLMQQANLLSPDGNTIADDAIVITCGDLVHRGPQSLEFVRLIRDTPNLYAVRGNNDDKQMLLRTDEWTKRATEKDWAFMKQLPYTIRVPSYNSTIVHAGLLPGKRLQDNTVFEMTSMRNIIKDEDCNWEATDDTKWGYNWAERWNGNMHIFFGHNARRGVDADGNPLVNFYGNATGLDTNCGKGVALSGVFMPVTETPKVYSTPCPKPKKTKKPKMFRK	5.1911	8.67304	1629.86	664.419	879.99	316.589	320.317	212.321	147.997	100.151	23.7001	37.2031	20.4077
OFUSG00621.1	1526.07	6.98068	0.684237	10.2419	1.28719e-24	8.00767e-23	CENTROSOMAL PROTEIN 2	.	.	.	.	.	.	PTHR23159	.	.	.	TCGCTTTTAAATGTTTGTTCACAATTGATTGAGAGTTTTAGCTACCTTTATGCCGACTTAGCTTGACGGTTATACAGTTTACATTGGAGATCTATGACCAGAACAGTACATTTCGAATTCGTTAATCTATAAATTGAATATACATATGTATTAACGGATCAATTAATGTTCTAATTACAGTAGTGGTTTGTACTGTTAAGGTACATAAAGGTGCAGGGTACAGTGAGATGCAGGGTAAAGTGGAAATGTGAACGGTACGTAAAATGGACATTAGAAGAGATGTCAAGTATTCCAGTATTATTTGAATTTGGAGATTGGGTGAAGTATATATCGATATTCAACATCTAAACATCATTCAGAATGCGCATTTATCACTTTATCAATGATGTTGACGAGTGT…	MTSYIRSTPISERVYDKDLMDFRQRSGHVDSDSGIGNGYTSARYNSISNRPKTRFDDEHDASVSHVRSSFSGSHGFKEDFKYEPRRPKSPGVALYTRDLDDDHVRSTSSYRSSIKSPVRFIDNDLNDLTSRSISPIGVPQRGSFGISPGTSHKSLRDNDRSLREVRESESLSRSLQESECRRDMLLQKLRDAHEVIVDQNKKYEQFCGSVKKSNFESDDYRHRENDYKRKIAQLERERNDQNNWRTDFFKQRDEMQERVDGLDLELRTLRSEHSLLQAEQGKRQAVVEQTRAAINLLEEENGKLSMTKESMGKEIVALKESLAIARDRVGTTETELRDNKTELYQLKETYLSLKARNDNDENKLSLLEAANNNMKMEIKKANAELSDLSEERHQLLRQN…	6.26589	36.4314	3522.14	1754.34	5928.71	5978.13	5556.25	5609.03	4012.64	3967.8	1873.2	2101.26	695.714
OFUSG18546.1	496.097	6.96123	0.963159	6.92868	4.2479e-12	7.70416e-11	TRANSFERASE, PUTATIVE-RELATED	.	.	PF04488.16^Gly_transf_sug^Glycosyltransferase sugar-binding region containing DXD motif^123-184^E:1.1e-09	.	.	.	PTHR46830	.	.	.	TTTTTGTGCTTGACGTGTATTTAGGTTTTTCATTCGTATGTAGAATTTAAATCGGCTTCAGAATGAGGACACATAAGAAAAAAGTTCGTTTGTTAATAGTACTGTTAGTATTTTTCATGGGATTTAAGATTGGTGTGTTCACAACAAGTAACACCTATTCAGGAATTAGGAAACACGACGACAGTTGGAAAGGACATAATCCAGCCAGGACACTGCCTTCTGATGAGAGGTCAAGTCACACCACAAATGATTCTCTAGTCCCTAACATTGTTCACTACATATGGGTTGATCTCAATGGGACGTACACGTTCACATTTCTATATGCAGTTAGTTTTATTAGCGTCCACAAGAACTGGAGACCCGAGGAAATTATGGTGCATATAAATAAAAACAATCAAC…	MRTHKKKVRLLIVLLVFFMGFKIGVFTTSNTYSGIRKHDDSWKGHNPARTLPSDERSSHTTNDSLVPNIVHYIWVDLNGTYTFTFLYAVSFISVHKNWRPEEIMVHINKNNQPKGRWWDYVTSIVTTKIRFLSYDMREIRIFGEKPRYVEHISDIMRLLLLKEYGGTYIDNDVIALRSLDPLRHYNHTQGVGLVTSALSNGVIIAKKTSRFLSIWLEEYKTYGKKEVYNLWGHYSVSKPRQLIKKHPELVRIERDTLVRPDMSDYRKLETRKRVWKYSYSMHVWRRFIYIPRRPEDIKRISNQSLLRDVMEYVIFDKIPYYAQNDTKLSLV	4.16877	1.07594	602.715	396.605	3220.27	2430.31	2083.09	1844.74	731.871	707.667	512.899	460.614	296.366
OFUSG09589.1	13943.3	6.95977	1.42396	5.15986	2.4713e-07	2.23885e-06	HAL-LIKE PROTEIN DDB_G0273787/DDB_G0273081	PAM_TAXWC^PAM_TAXWC^Q:514-1632,H:124-499^42.175%ID^E:1.8e-90^RecName: Full=Phenylalanine aminomutase (L-beta-phenylalanine forming);^Eukaryota; Viridiplantae; Streptophyta; Embryophyta; Tracheophyta; Spermatophyta; Pinopsida; Pinidae; Cupressales; Taxaceae; Taxus	PAM_TAXWC^PAM_TAXWC^Q:514-1632,H:124-499^42.175%ID^E:1.8e-90^RecName: Full=Phenylalanine aminomutase (L-beta-phenylalanine forming);^Eukaryota; Viridiplantae; Streptophyta; Embryophyta; Tracheophyta; Spermatophyta; Pinopsida; Pinidae; Cupressales; Taxaceae; Taxus	PF00221.20^Lyase_aromatic^Aromatic amino acid lyase^75-456^E:5e-108	.	.	.	PTHR10362:SF35	GO:0005737^cellular_component^cytoplasm`GO:0016869^molecular_function^intramolecular transferase activity, transferring amino groups`GO:0045548^molecular_function^phenylalanine ammonia-lyase activity`GO:0009821^biological_process^alkaloid biosynthetic process`GO:0009800^biological_process^cinnamic acid biosynthetic process`GO:0006559^biological_process^L-phenylalanine catabolic process`GO:0006558…	GO:0005737^cellular_component^cytoplasm`GO:0016869^molecular_function^intramolecular transferase activity, transferring amino groups`GO:0045548^molecular_function^phenylalanine ammonia-lyase activity`GO:0009821^biological_process^alkaloid biosynthetic process`GO:0009800^biological_process^cinnamic acid biosynthetic process`GO:0006559^biological_process^L-phenylalanine catabolic process`GO:0006558…	.	CTTTATTGGAGTTTATACTCATTGACACCCGCCAATCATTATCTGCTCCACTTAGGTAACTTTGACTTACATAACCTTAGCAGCCACACAATAACCCTGGATCCTGTTTACCTGTCAATCATTTCACAAGGCCCTCCCACACTTGTCACGACCATCACGATACTGATACCACCAAATGGGATAAAATCTGGGAACTAGATCATTTGCAATTGTGAAGTCGACCAACTCATACACAAAATCAACAAAGTCACATACAGAATCATGAGTTTTAGAAATACCACAGACCATCGCTTGAATTGCGTGAGATTGTTGGACAACCATAGTGCGATCACTAAACAAGTGACCATTGATGGCGACAAACTTACGCTCCCAGAAGTATTTGAAGTAAGCCGCAACAAG…	MSFRNTTDHRLNCVRLLDNHSAITKQVTIDGDKLTLPEVFEVSRNKNVQVQVKDDNKEKGMQNGASKEDVTDQRRFFQVGMGRNLPTEMVRSAMLVRANHNCASEAGIKGEAIKLLVELLNRNIIPNVPERGSTSATGDLVQMTYVASCLAGNADVYVNDNGERKSADEALKDAGLKPVTLTPNETVSLINSDAFCTGIAACAVYNANIMAMLTQVATGMAVEALFGRTESFHHLLHDCLPHLGQKETGRNMLGIMKNTKIAISILDMYIPDEPGKLKQDRYSLRSSPQWLSPVLETLSLATQRVEVQLNASTEKPVTDHCTDLLTGGNAQGMMMAMTMDQTRQALQICGKLIFAQFQEVVNDKLNYGLPHNLAGSDPANDQGFIGLDIAMASYMTELD…	51.1177	153.554	30827	24346.3	68490.4	51956.3	73272.8	62160.5	22773.4	21889.7	2724.24	14778.4	2479.27
OFUSG05910.1	247.279	6.94476	0.932029	7.31908	2.4967e-13	5.23542e-12	FI02810P	PLCX1_DANRE^PLCX1_DANRE^Q:480-1334,H:5-309^23.75%ID^E:6.73e-13^RecName: Full=PI-PLC X domain-containing protein 1;^Eukaryota; Metazoa; Chordata; Craniata; Vertebrata; Euteleostomi; Actinopterygii; Neopterygii; Teleostei; Ostariophysi; Cypriniformes; Cyprinidae; Danio	PLCX1_DANRE^PLCX1_DANRE^Q:480-1334,H:5-309^23.75%ID^E:6.73e-13^RecName: Full=PI-PLC X domain-containing protein 1;^Eukaryota; Metazoa; Chordata; Craniata; Vertebrata; Euteleostomi; Actinopterygii; Neopterygii; Teleostei; Ostariophysi; Cypriniformes; Cyprinidae; Danio	PF00388.20^PI-PLC-X^Phosphatidylinositol-specific phospholipase C, X domain^135-238^E:3.2e-07	.	.	KEGG:dre:550368	PTHR13593:SF113	GO:0008081^molecular_function^phosphoric diester hydrolase activity`GO:0006629^biological_process^lipid metabolic process	GO:0008081^molecular_function^phosphoric diester hydrolase activity`GO:0006629^biological_process^lipid metabolic process	.	atgaaatgtgtggacaaagcccggcaaaatggAGGTCTTGGAGGGAAGAGCATTGCAAACATCCACGAAGTACTATACTATGATGATGGTGGTAATAGGAAAACGAGGATTATCACAATAATTCAAAAGCATATCAGAGGCCTGTCTTTTGCAACTATAATTTTATCTGACCAAGCGAAGCCATGGGGGGATGCTGCAACAAAGGACGTTGCATGTGTAACTGCTGCGTCTCTTGCTGTATGAACATTAGACATGTTTCCAACGCTATCTTGCGTGTATTTGAGAATCTACCCATAATTGGCCACATAGTCAGTGCCATCTATATGTGTTTACCATGGGGCAATAAGTCCCAAGCTGAAAGGGCGGCTCTTAAAGCGACCACTGGGCTTCTACCTCCAA…	MGGCCNKGRCMCNCCVSCCMNIRHVSNAILRVFENLPIIGHIVSAIYMCLPWGNKSQAERAALKATTGLLPPISLLGFMCEWWDEVGRKKSPKTATLMFDDRTDWMGNFHDVRMENICLPGSHQSATYKVDRKLNKCLPLVEGWSQCQNLSITEQLNAGIRFLDLRIMSHENDVWCHHNIIRCVTLKEVVEDVKQFVDLHPSEIVGLHIVNDGKALAWSKTNDIIRNILGSKIVHPDNMGKTLGEITRQGGNVILFGLYEVNDRWPNLTHYWPNKQYPHQLSEDIKEAYDYCMTNRQHDLIWYKAELTPDAYIIARNIGNMVGVVVSRCADEKFEFLEDMAHAANHSVLEAMKEWTYIPFNMLCVDFVDDNIIQRIIEMNYAQAHQPRPGAATANYSVF…	2.08458	6.45438	780.586	540.604	869.068	847.847	919.93	797.921	504.458	430.599	196.265	351.469	381.037
OFUSG20814.1	127.507	6.92584	0.976928	6.53424	6.39351e-11	9.84537e-10	DEGENERIN-LIKE PROTEIN UNC-105	FANA_CORAP^FANA_CORAP^Q:121-1797,H:41-568^25.806%ID^E:7.41e-53^RecName: Full=FMRFamide-activated amiloride-sensitive sodium channel;^Eukaryota; Metazoa; Spiralia; Lophotrochozoa; Mollusca; Gastropoda; Heterobranchia; Euthyneura; Panpulmonata; Eupulmonata; Stylommatophora; Helicina; Helicoidea; Helicidae; Helix	FANA_CORAP^FANA_CORAP^Q:121-1797,H:41-568^25.806%ID^E:7.41e-53^RecName: Full=FMRFamide-activated amiloride-sensitive sodium channel;^Eukaryota; Metazoa; Spiralia; Lophotrochozoa; Mollusca; Gastropoda; Heterobranchia; Euthyneura; Panpulmonata; Eupulmonata; Stylommatophora; Helicina; Helicoidea; Helicidae; Helix	PF00858.25^ASC^Amiloride-sensitive sodium channel^24-564^E:1.6e-80	.	.	.	PTHR11690:SF248	GO:0016021^cellular_component^integral component of membrane`GO:0005272^molecular_function^sodium channel activity	GO:0016021^cellular_component^integral component of membrane`GO:0005272^molecular_function^sodium channel activity	GO:0005272^molecular_function^sodium channel activity`GO:0006814^biological_process^sodium ion transport`GO:0016020^cellular_component^membrane	AAAACATTAGGCCTCCAAAATAGTGTTTGTGATTTAAAAGCGACTAGGATATTGTTATGAAAGATTATGGTTTATTGCAGTTCTAGTATTATAAAACTAAATATGGCCAAGAGAATTCACGACGTCGTTCAGCGCTTTGCTTCAGGAACTACAATACATGGAGTGCCAAAACTTATACGAGCGCAAACCATTCCGGGTAAGATTTTCTGGTCTTTGATATGCCTAGCTGCTCTAGGGGTGTTCATTTTTGAATTAGCGCTTCTCCTACAAAAATTCTTTGGATATCCGAAAAGCGTTGATGTGAAGGTCGTGCAGGAACCAGTTGCGTTTCCCTCTGTGACGGTTTGTTCCGTCCATGCCATGGACCCTTTTGTGATTCATAAAATTTACAAACTTCGA…	MVYCSSSIIKLNMAKRIHDVVQRFASGTTIHGVPKLIRAQTIPGKIFWSLICLAALGVFIFELALLLQKFFGYPKSVDVKVVQEPVAFPSVTVCSVHAMDPFVIHKIYKLRQEQMEHRMRRKPWVISKNVSDFEKWYFDTFLKKSMSYVLEPSYLEGLIDRHDLKTEFFPSLSSRLTLAANLNKSITFPGVEPAELIAFCRYARQECSFEHFKTVFDPYYFNCFTFNASVIAGSLKTLAEGIENALSIVMYIPKLHNEIKIGTKVKLPGIVEHDIRDPLAGSGGVRVVIHPPDTQPHPATEGFDIMPGYSVSIGVKTTENTRLGRPYGNCTETTKGVFSDKASYRYTMTSCRKKCLQNLLSREVKDGCGCLDVVLPTFPEVNGVDFCAKFDDIPRKCIF…	2.08652	1.07373	493.898	109.52	209.045	176.75	214.349	153.43	227.508	243.882	450.611	215.519	931.556
OFUSG18134.5	171.443	6.91455	1.46166	4.44594	8.75069e-06	6.0309e-05	PRO-NEUREGULIN-2, MEMBRANE-BOUND ISOFORM	NRG2_MOUSE^NRG2_MOUSE^Q:131-1015,H:12-292^28.713%ID^E:3.12e-22^RecName: Full=Pro-neuregulin-2, membrane-bound isoform;^Eukaryota; Metazoa; Chordata; Craniata; Vertebrata; Euteleostomi; Mammalia; Eutheria; Euarchontoglires; Glires; Rodentia; Myomorpha; Muroidea; Muridae; Murinae; Mus; Mus	NRG2_MOUSE^NRG2_MOUSE^Q:131-1015,H:12-292^28.713%ID^E:3.12e-22^RecName: Full=Pro-neuregulin-2, membrane-bound isoform;^Eukaryota; Metazoa; Chordata; Craniata; Vertebrata; Euteleostomi; Mammalia; Eutheria; Euarchontoglires; Glires; Rodentia; Myomorpha; Muroidea; Muridae; Murinae; Mus; Mus	PF13927.7^Ig_3^Immunoglobulin domain^151-227^E:2.8e-16`PF07679.17^I-set^Immunoglobulin I-set domain^155-240^E:1.8e-20`PF13895.7^Ig_2^Immunoglobulin domain^156-240^E:1.1e-09`PF00047.26^ig^Immunoglobulin domain^159-233^E:2.3e-09	sigP:1^22^0.758^YES	.	.	PTHR11100:SF20	GO:0005615^cellular_component^extracellular space`GO:0098982^cellular_component^GABA-ergic synapse`GO:0098978^cellular_component^glutamatergic synapse`GO:0016021^cellular_component^integral component of membrane`GO:0005886^cellular_component^plasma membrane`GO:0005154^molecular_function^epidermal growth factor receptor binding`GO:0005006^molecular_function^epidermal growth factor-activated recept…	GO:0005615^cellular_component^extracellular space`GO:0098982^cellular_component^GABA-ergic synapse`GO:0098978^cellular_component^glutamatergic synapse`GO:0016021^cellular_component^integral component of membrane`GO:0005886^cellular_component^plasma membrane`GO:0005154^molecular_function^epidermal growth factor receptor binding`GO:0005006^molecular_function^epidermal growth factor-activated recept…	.	TTTCAGGTTCAGAGAGAAGTAGTAGAAAAGCATGTGAGATGACAAAACAAACATTATCGAGTGAAAACAGCAATAAAGGAACATTGATCTCATCATGGAGTACACACTAATAATTTATACAGTTTTAGGATTGCTTATAACAGTGAATTTAGGACAGGGAAGTACGTGTGATACAGATTTAAAAGATGTTGGTTCGAAGGCAATTTTTTCACAAATTGTTGTGGAATCAAAAATTCTCAAAAAGGTGCTTTCCGATGCTAGTGAAGGATCTCTTGCTAAATATACAGCTGTAGTGTCATTAAAAAAGTTTTATAAGGGTAGCATTAAAAACACTAAAGGAAAAAAGCCAAAGTCTATCAAATTAAATGAATTCATATCTAAAGATTCAGAGGACTGTCT…	MEYTLIIYTVLGLLITVNLGQGSTCDTDLKDVGSKAIFSQIVVESKILKKVLSDASEGSLAKYTAVVSLKKFYKGSIKNTKGKKPKSIKLNEFISKDSEDCLAEIDSTKTYILFLNSTDKQQHFITSSKPVTSDKKTLKLIRGILKKKPSPPKVTQLKPATFEAGKRLQLKCKIRGNPPPTVIWTKDGVTIKKKKGVSIKTNKKGSRLRIRKAKESDAGDYGCTATNVLGQFTQSAEIMVTPKPGTATKAPTTATVSPTTSSRHYEECEGEMRNYCLNNGTCGYLPKLKREFCMCPLNYTGKRCDVFSPPIPSIGPIMPPGKEAAEKDRVITISAIIVGAVVIIGLCVLAYFLARRRKKQYYQRKQVEAATKKRENENNFTNASYRPIVPQVNDVIVRS…	0	1.07221	222.39	424.337	356.832	610.64	282.48	456.268	195.376	226.803	604.015	284.848	811.414
OFUSG12370.1	449.043	6.91194	0.634337	10.3155	5.99875e-25	3.87804e-23	2-5A-DEPENDENT RIBONUCLEASE	ANK2_HUMAN^ANK2_HUMAN^Q:565-1854,H:226-684^32.473%ID^E:1.47e-57^RecName: Full=Ankyrin-2;^Eukaryota; Metazoa; Chordata; Craniata; Vertebrata; Euteleostomi; Mammalia; Eutheria; Euarchontoglires; Primates; Haplorrhini; Catarrhini; Hominidae; Homo`ANK2_HUMAN^ANK2_HUMAN^Q:517-1851,H:348-782^31.096%ID^E:8.44e-50^RecName: Full=Ankyrin-2;^Eukaryota; Metazoa; Chordata; Craniata; Vertebrata; Euteleostomi; …	ANK2_HUMAN^ANK2_HUMAN^Q:565-1854,H:226-684^32.473%ID^E:1.47e-57^RecName: Full=Ankyrin-2;^Eukaryota; Metazoa; Chordata; Craniata; Vertebrata; Euteleostomi; Mammalia; Eutheria; Euarchontoglires; Primates; Haplorrhini; Catarrhini; Hominidae; Homo`ANK2_HUMAN^ANK2_HUMAN^Q:517-1851,H:348-782^31.096%ID^E:8.44e-50^RecName: Full=Ankyrin-2;^Eukaryota; Metazoa; Chordata; Craniata; Vertebrata; Euteleostomi; …	PF12796.8^Ank_2^Ankyrin repeats (3 copies)^56-125^E:1.1e-11`PF13637.7^Ank_4^Ankyrin repeats (many copies)^64-115^E:1.4e-07`PF00023.31^Ank^Ankyrin repeat^94-125^E:8.5e-06`PF13606.7^Ank_3^Ankyrin repeat^94-123^E:0.0016`PF13637.7^Ank_4^Ankyrin repeats (many copies)^99-148^E:1.9e-07`PF12796.8^Ank_2^Ankyrin repeats (3 copies)^169-257^E:1.8e-14`PF13857.7^Ank_5^Ankyrin repeats (many copies)^196-234^E:5.…	.	.	KEGG:hsa:287`KO:K10380	PTHR24141	GO:0031672^cellular_component^A band`GO:0016324^cellular_component^apical plasma membrane`GO:0016323^cellular_component^basolateral plasma membrane`GO:0043034^cellular_component^costamere`GO:0005856^cellular_component^cytoskeleton`GO:0005829^cellular_component^cytosol`GO:0005769^cellular_component^early endosome`GO:0014704^cellular_component^intercalated disc`GO:0005764^cellular_component^lysosom…	GO:0031672^cellular_component^A band`GO:0016324^cellular_component^apical plasma membrane`GO:0016323^cellular_component^basolateral plasma membrane`GO:0043034^cellular_component^costamere`GO:0005856^cellular_component^cytoskeleton`GO:0005829^cellular_component^cytosol`GO:0005769^cellular_component^early endosome`GO:0014704^cellular_component^intercalated disc`GO:0005764^cellular_component^lysosom…	GO:0005515^molecular_function^protein binding	CAATGACAAATATAAACAGGCTTTTCTCCAAGTTCTAACACGAGATTTTACATTACTTATAATGAATCTCCGTGCCATAGTTTGTGATCTCGATCGTTAAGTAGAGAAGAGGAAAACTGAAAGTTATCCCTAATGGGTTTCATGTAATTGTGGATAATTATTGAATGTACGATTAAAGCGGAGGGTTAATCAATTAATCTTTCGTGAGGAACAATAAACGTTATAATTGGAACTATAAATCAGACAGACTGAACAACAATCCATATCAGGGGAAATGTTTTGGATACAGACTTCACCATTAAATACCATACGTTCTAGTATTAATGAGACTGCTTCTAGGTGATATTACTAGAGTTAGAGATTGATACGGACATACTATAGATCTATACTTATAAACAA…	MDTLLARIAEKTDELPEDDLETLATDIERAIWRRDEATVLRIFQHRPRRLVLGALNHLSVDGESPVHAAALHGEANLLRLMIEFGAGVNGVNKYGWTPLHSAASGNEIQTANMLLQHGANIHATDRHGDSALHWSAENGNPGLSQLLIEEGALVNQMNKIGVGETPLTKAAQNNKIPTAMLLIMLGSEVNWNKGKPAIHAAAKQGHTLMVNMLLDHRVKVNLKDGDGNTALHMAAVGDHTATAKLLIERGARINDKNKAGQTPLHYAALENSVQTTKMLLLKNADFTIPNYIGELALHNAAYMGNVDILRMLMDKGSNIDAITNCDKSPLILASQTEHSLGCSVLMQRGADVNINDQYCFTPLHFAAWRGSFKVVRELLDKGAKANILGMTVLGEYSTP…	4.17135	2.14921	367.171	508.09	1259.11	1585.53	1631.12	1554.96	1297.44	1295.55	1173.58	996.635	431.433
OFUSG21806.1	2389.35	6.90695	0.867105	7.89336	2.94162e-15	7.5788e-14	NK2 HOMEOBOX 1A-RELATED	NKX21_HUMAN^NKX21_HUMAN^Q:115-867,H:1-270^50.719%ID^E:8.8e-63^RecName: Full=Homeobox protein Nkx-2.1;^Eukaryota; Metazoa; Chordata; Craniata; Vertebrata; Euteleostomi; Mammalia; Eutheria; Euarchontoglires; Primates; Haplorrhini; Catarrhini; Hominidae; Homo	NKX21_HUMAN^NKX21_HUMAN^Q:115-867,H:1-270^50.719%ID^E:8.8e-63^RecName: Full=Homeobox protein Nkx-2.1;^Eukaryota; Metazoa; Chordata; Craniata; Vertebrata; Euteleostomi; Mammalia; Eutheria; Euarchontoglires; Primates; Haplorrhini; Catarrhini; Hominidae; Homo	PF00046.30^Homeodomain^Homeodomain^160-216^E:7.1e-20	.	.	KEGG:hsa:7080`KO:K09342	PTHR24340:SF94	GO:0000790^cellular_component^nuclear chromatin`GO:0005654^cellular_component^nucleoplasm`GO:0005634^cellular_component^nucleus`GO:0005667^cellular_component^transcription regulator complex`GO:0003677^molecular_function^DNA binding`GO:0003700^molecular_function^DNA-binding transcription factor activity`GO:0000981^molecular_function^DNA-binding transcription factor activity, RNA polymerase II-spec…	GO:0000790^cellular_component^nuclear chromatin`GO:0005654^cellular_component^nucleoplasm`GO:0005634^cellular_component^nucleus`GO:0005667^cellular_component^transcription regulator complex`GO:0003677^molecular_function^DNA binding`GO:0003700^molecular_function^DNA-binding transcription factor activity`GO:0000981^molecular_function^DNA-binding transcription factor activity, RNA polymerase II-spec…	GO:0003677^molecular_function^DNA binding	AGGCTAAGGAGACATTTATTATCGTGACATAAGCGCACAAGTGTTAAGACTTCATTATAATAGCAAGCTTATTAAACATAGGGAACATTTAAAACTTTATCAGTAGGGCGGATGATGTCCTGCAGCCCAAAACATACTACACCGTTCTCCGTGACTGATATACTAAGCCCGATCGAGGAGACATACAAGAAAACAAGCATAGAGGCCAGCATACCTCCACTATCTTTCCGACCGACGGGGCAACACAACAGTCAAGTTATGAGCGGGATGGGCTCGATGAGTGTCCCCGTTACGAACCCTTACCACACAAGCTACACGATGCCACCGTCCCTGACGCACCATTCGGCTTACAGCCCGCAGTGCTATCAGAGCCCAGAACTCTCGCATTATGGAGATCCT…	MMSCSPKHTTPFSVTDILSPIEETYKKTSIEASIPPLSFRPTGQHNSQVMSGMGSMSVPVTNPYHTSYTMPPSLTHHSAYSPQCYQSPELSHYGDPTRQSASSWYGTNPSDPARFAISRLMGAQPSSCMSSMPGMNQMSMSALGYDHTKHPLQYPLTQRRKRRVLFSQAQVYELERRFKSQKYLSAPEREHLANMINLTPTQIKIWFQNHRYKHKRQQKDKEKLDEREKSSSSQQSPRRVAVPVLVKDGKPCSGTNNSDSSHSSQQPQTGATAAHTPQQATPPEVDTKPIQMTQANTLVNSVSPSALTSHSQSLSSDYLNNYTTPGLNNSSTTSSSYLLNQRAW	122.011	8.597	10505.3	8510.31	9449.41	9166.01	4224.73	5487.46	5006.5	4305.95	2142.76	1682.04	3828.22
OFUSG15710.1	80.3171	6.88932	1.0294	5.93975	2.85461e-09	3.54388e-08	.	.	.	.	.	.	.	.	.	.	.	AAAACAAAAGATGTAACAACTTTTAGAGTGACAATCGTATTTCTTATCTCACCTTACGAGCATAATAATATGCTTTAGCACCTCGAGCGCAAAGTCTAGATCGGTAAAGGTCTCTTTTAAGAAGCCAAACGAATGTTACGGGTGATATTTCAACATTTGGGGATAAAGATGATCACTAATCATCCGCAAGAAACTTCGCAAGCTTCGAAACTTGCAGTGTACCGAGAGCAGAAGAAGCTATCACATAGACTAGATAAAATATCAATATGTGAGGAAAGAGCACGGAAACACAGCAACGCCTATCAGAGACGCGTAGAGTATGAACTATTTGGCCACCCTGTACGTAAATCCACAGGGCGGTACAATAAAAGCTACAAAGAAAAACGAAATCGTGTGTTA…	MLRVIFQHLGIKMITNHPQETSQASKLAVYREQKKLSHRLDKISICEERARKHSNAYQRRVEYELFGHPVRKSTGRYNKSYKEKRNRVLDTKNGTETHSMVKLPTIKQDAVRSRRSKKRRVQSPDIAVFPNISAAQSVDNILDERQVKYMPRNVDIKKERRPNDSFQRFITEKQSNSENDGNQKPLLQSTEVSGGKDSMKNTSNARKRRLLKKYGRRWLRKTIRKPKGSGQNNPKIPRHHSDPEEEPPDLTNFISKMLEQYRTQKDDNNRDTDFLESKTRKSKNIGGKYYASTAKLFATVNNTKGIGDRKKATSENVDMIQRRSRGRRDDKHFRRMSVVMQNSAMFVQGLEWENTDEQTTL	1.04141	1.07754	138.511	219.274	124.137	116.443	160.566	130.129	424.23	250.032	348.981	141.02	110.555
OFUSG05354.1	1775.9	6.86956	1.23129	5.79835	6.69708e-09	7.81502e-08	IROQUOIS-CLASS HOMEODOMAIN PROTEIN IRX	ARA_DROME^ARA_DROME^Q:535-1089,H:132-326^61.026%ID^E:2.28e-58^RecName: Full=Homeobox protein araucan;^Eukaryota; Metazoa; Ecdysozoa; Arthropoda; Hexapoda; Insecta; Pterygota; Neoptera; Holometabola; Diptera; Brachycera; Muscomorpha; Ephydroidea; Drosophilidae; Drosophila; Sophophora	ARA_DROME^ARA_DROME^Q:535-1089,H:132-326^61.026%ID^E:2.28e-58^RecName: Full=Homeobox protein araucan;^Eukaryota; Metazoa; Ecdysozoa; Arthropoda; Hexapoda; Insecta; Pterygota; Neoptera; Holometabola; Diptera; Brachycera; Muscomorpha; Ephydroidea; Drosophilidae; Drosophila; Sophophora	PF00046.30^Homeodomain^Homeodomain^168-225^E:4.5e-07`PF05920.12^Homeobox_KN^Homeobox KN domain^183-222^E:2e-15	.	.	KEGG:dme:Dmel_CG10571	PTHR11211	GO:0005737^cellular_component^cytoplasm`GO:0005634^cellular_component^nucleus`GO:0000981^molecular_function^DNA-binding transcription factor activity, RNA polymerase II-specific`GO:0043565^molecular_function^sequence-specific DNA binding`GO:0048468^biological_process^cell development`GO:0001745^biological_process^compound eye morphogenesis`GO:0048813^biological_process^dendrite morphogenesis`GO:0…	GO:0005737^cellular_component^cytoplasm`GO:0005634^cellular_component^nucleus`GO:0000981^molecular_function^DNA-binding transcription factor activity, RNA polymerase II-specific`GO:0043565^molecular_function^sequence-specific DNA binding`GO:0048468^biological_process^cell development`GO:0001745^biological_process^compound eye morphogenesis`GO:0048813^biological_process^dendrite morphogenesis`GO:0…	GO:0003677^molecular_function^DNA binding`GO:0006355^biological_process^regulation of transcription, DNA-templated	TATTTGAAGAAAGCAAAGTTGGGGAATCAAGTGGATGGTTCAAGCATAGAAGAAGCACCAGCCAAGAGAGTCACGGTACCACATGCATTGGAGTATGTACACGTACAACAAGCAGGGAACGTCTCGCTTTTAAATACGACTTTTCAAAAACAAGAGTCAAACCTGCAGAAGACATTGGTGACTTCACTCGAGTTTTGTATTAACACAGAACCGGACAAGTGAACACATCTCACAGTGACTGGTTTACATATTGTCATACATGGGAACAACTTGGACTCAACTGACATAAAGACTACAACTTAACAACATTAAGTTATATAACTTTACCTAGGATTAAAGCAGTGCAACTTTTGGAGATAACGGATACACGAGACATTCAGAATGTCGACTTATCCGCAA…	MSTYPQFGYSYPSAASALTAASSQLLMPTVSTLSTTVSGSTLSSSSAPTTSCCESGRPIMTDPHTGQTICSCQYNPSLLSYPRISLGDTSVYSSAIAAQGYMPFGADPSAFYSPLNGYDLKDGSASATADAWRSLSQPMAGYPYDPTGMAGYPYGNSYGGMDLNAGARRKNATRETTSTLKAWLYEHRKNPYPTKGEKIMLAIITKMTLTQVSTWFANARRRLKKENKMTWSPRNRCGDGRDKDSDDDDDDMDDAKDDNNNAGSDDEDTKLNDEIKLGGDVDKDVRKDSRLPDLSTSTASTTVTNLQNNTNGDSAPKPRIWSLADVATSTTPSSGRRSPSLSTSTIPPKAEHFNSPMNSLRQWVDGAYTTSQSSQSSHPSFSHPYLFSSNPSAMGLPST…	7.30594	20.383	2939.3	2502.65	2500.11	2441.58	3607.88	4245.43	4487.97	4294.32	6128.61	5455.89	9159.48
OFUSG04729.1	174.022	6.83924	0.882669	7.57288	3.65035e-14	8.29295e-13	OVIDUCT-SPECIFIC GLYCOPROTEIN	CHIA_RAT^CHIA_RAT^Q:644-1822,H:4-386^42.965%ID^E:5.46e-108^RecName: Full=Acidic mammalian chitinase;^Eukaryota; Metazoa; Chordata; Craniata; Vertebrata; Euteleostomi; Mammalia; Eutheria; Euarchontoglires; Glires; Rodentia; Myomorpha; Muroidea; Muridae; Murinae; Rattus	CHIA_RAT^CHIA_RAT^Q:644-1822,H:4-386^42.965%ID^E:5.46e-108^RecName: Full=Acidic mammalian chitinase;^Eukaryota; Metazoa; Chordata; Craniata; Vertebrata; Euteleostomi; Mammalia; Eutheria; Euarchontoglires; Glires; Rodentia; Myomorpha; Muroidea; Muridae; Murinae; Rattus	PF00704.29^Glyco_hydro_18^Glycosyl hydrolases family 18^37-384^E:1.2e-89	.	.	KEGG:rno:113901`KO:K01183	PTHR11177:SF217	GO:0005737^cellular_component^cytoplasm`GO:0005576^cellular_component^extracellular region`GO:0005615^cellular_component^extracellular space`GO:0008061^molecular_function^chitin binding`GO:0004568^molecular_function^chitinase activity`GO:0019900^molecular_function^kinase binding`GO:0006915^biological_process^apoptotic process`GO:0052356^biological_process^catabolism by host of symbiont cell wall …	GO:0005737^cellular_component^cytoplasm`GO:0005576^cellular_component^extracellular region`GO:0005615^cellular_component^extracellular space`GO:0008061^molecular_function^chitin binding`GO:0004568^molecular_function^chitinase activity`GO:0019900^molecular_function^kinase binding`GO:0006915^biological_process^apoptotic process`GO:0052356^biological_process^catabolism by host of symbiont cell wall …	GO:0005975^biological_process^carbohydrate metabolic process	AAATACGTATATTTATTCAGACAACGTTCTTTAGTTCTGCAGATATTTGTGTTCTGCCTGCTCAAAACGGTTAATTACAAAATAATATTAAGGACATTCTTCCAGGAAAAGAGAAATATTTAAACACAAGAAATGTCTTACGTTTTTGATAGACGAACTGTCCAATTTGAATAGTAATGCTGTATTCCAATATTAGAAAACCCTATCACTGATGTCAATAGGAAATCAAGATATGATACATTATATAAATGATTGTACATGCAGGCATTTCAATTATGAATTTAAAATCAAACATATGTCACATAGCCTATGTAGAAATGTAATTAGTAATAAAGATGTACATTGACTTCTCGATGCTAATTTATAAGTCACTCAAAATGGTGGTGAAGGCCTATATTG…	MVSAILQSMEWFVTLVFGIFVWLPIPIISAQRQGFRRVCYFASWSIHREVEEARFDIDYIEPDLCTHLIYAFAKIDPTSLTLTPWDETDINNGVDLPNYNKFNDIKERNSNLKTLLSVGGHTAGTNQFIQMVATKKRRVKFILSAIDILRTYGFNGIDIDWEFPRSHDRAQFTELIKEFREAFEKESKMTKRPRLILTAAVGVNENQITYSYDVAQISKYLDFFNVMTYDFHGHWQSYLGFNSPLFSRNSQNRKFSHSLSQEWVINRYIQAGAPRHKLVLGMAMQGRSFTLANPRATMIGAKATGPGYAGRMTREKGVMSYFEICELERSGEGSLQWDSVQMCPYFHKGDFWIGYDNRRSIAIKTAWLVKNKLGGAMVWSIDLDDYQGTFCNEGTYPLI…	3.12963	5.36912	861.6	400.542	749.305	401.13	558.914	473.994	530.967	396.525	118.698	105.094	38.214
OFUSG15980.2	392.52	6.83675	1.28202	5.44924	5.05867e-08	5.15925e-07	N-ACETYLNEURAMINATE 9-O-ACETYLTRANSFERASE	CASD1_MOUSE^CASD1_MOUSE^Q:302-2596,H:42-780^46.503%ID^E:0^RecName: Full=N-acetylneuraminate 9-O-acetyltransferase {ECO:0000250|UniProtKB:Q96PB1};^Eukaryota; Metazoa; Chordata; Craniata; Vertebrata; Euteleostomi; Mammalia; Eutheria; Euarchontoglires; Glires; Rodentia; Myomorpha; Muroidea; Muridae; Murinae; Mus; Mus	CASD1_MOUSE^CASD1_MOUSE^Q:302-2596,H:42-780^46.503%ID^E:0^RecName: Full=N-acetylneuraminate 9-O-acetyltransferase {ECO:0000250|UniProtKB:Q96PB1};^Eukaryota; Metazoa; Chordata; Craniata; Vertebrata; Euteleostomi; Mammalia; Eutheria; Euarchontoglires; Glires; Rodentia; Myomorpha; Muroidea; Muridae; Murinae; Mus; Mus	PF07779.13^Cas1_AcylT^10 TM Acyl Transferase domain found in Cas1p^306-804^E:1.1e-211	.	.	KEGG:mmu:213819`KO:K03377	PTHR13533:SF1	GO:0005794^cellular_component^Golgi apparatus`GO:0030173^cellular_component^integral component of Golgi membrane`GO:0016407^molecular_function^acetyltransferase activity`GO:0047186^molecular_function^N-acetylneuraminate 7-O(or 9-O)-acetyltransferase activity`GO:0005975^biological_process^carbohydrate metabolic process	GO:0005794^cellular_component^Golgi apparatus`GO:0030173^cellular_component^integral component of Golgi membrane`GO:0016407^molecular_function^acetyltransferase activity`GO:0047186^molecular_function^N-acetylneuraminate 7-O(or 9-O)-acetyltransferase activity`GO:0005975^biological_process^carbohydrate metabolic process	.	tatatatacacctggtgtataatataagtaatatatggaggacttcccactatccgtgCGTCACAAGTACAAAACTAAATCAATCAACGAACACTGAGCCTAACGTACGCATTTTGAAACCGTTCGTTATTTTACTGCAACATTTAAGACGAGAACCCTCGAGATGTGAATGATGGCAGACCAAAAATTAAAAGAAAGTCCAACTCATGAAATAACAACCTATATAAACATTGAAAATGCTAAAATTGGTGCATTCTTTCTTATTATTGGATTTACTATCTATCATGGATCTATCAACATAAGATACGGAAGTGATTCATGTAAGTGGTTGCTAAGTGATGGAAGGTTCCAGGGATATAATGCATGGCAACCATATGGGTGCATGATGCACAAATATAC…	MMADQKLKESPTHEITTYINIENAKIGAFFLIIGFTIYHGSINIRYGSDSCKWLLSDGRFQGYNAWQPYGCMMHKYTKSNSRDCMHYISYWGGKNHFVFLGDSRIRQLYTKFVSELSQDEEKEVEDPEHPVHRDMHFEDNAINLKVDFLWQPMVNKSMYEIYQEWGRVESRKRPNVVVTGSATWSIKQNNGSKTALENFKMNMTFLHRLFPKLGNKTNIYWMLQDPVIESKLSSNRSMLTNRQIDEYNRATLHTLRDTNSKATLWSSSRLVAQGYNRDSVDGLHLGPVALNIDFQMLVNRYCNDHMNYNDGTCCRSMEPITVVQLITASVFGLSILISAVLVIYQRKYNRRSGAKARAGVEGPDATMIENGKRKVLEAPTMKESKSELFNNFYTISTSI…	20.8769	0	2326.95	1650.57	1346.96	908.037	741.185	830.947	425.25	505.414	343.568	335.022	438.51
OFUSG17981.1	284.504	6.83361	0.734461	9.23066	2.68975e-20	1.15746e-18	.	.	.	.	.	.	.	.	.	.	.	AGCAGGGAAATCCCCCGAGAGTAGAGATGTTTCTCCTAGCAGTGGCCCAGAGCGATTGCAGGGAGGGGGTGTCTCCCAGAGTGAAACCTACAACACCAATCCTCAGGTAACGACACTAACAGTTCAACTCCCCACCAGTTTGAATGACCCTATCAATCTGAAAACTAGCATCCACGCAGAACACAATGTAGTTGACTCAAACAATGGCGCAAATGAGGAGATCTCAGAAACGGAGGCCGCAACTCAGTCTCTAGAGGCAGCTAATGAAGCTCTGATCCATGATCTCTCACAAGTAACAAGCGTGGCCATCTCGAACCCTATGTTGGCGTCATCCCCGGGGCCACGGCCTGTTCCCGTCCTTACCCAGCCAATTAGCCCCCCTGTCGCCACATCATCCCC…	AGKSPESRDVSPSSGPERLQGGGVSQSETYNTNPQVTTLTVQLPTSLNDPINLKTSIHAEHNVVDSNNGANEEISETEAATQSLEAANEALIHDLSQVTSVAISNPMLASSPGPRPVPVLTQPISPPVATSSPLPTPPSSSPMLTIPTPVLISPDTGLTTSLPPQQQIIFSPMLTDQSSGLTSTPASIKEEMTIQQSTMAQYVNAQYSEHQSLPSTPTTPITQHTMWTEWQLKPGQQSISNVQEPQHQNVFKK	7.25287	21.7685	1224.8	2713.24	548.795	900.994	122.851	256.936	183.321	169.298	400.441	420.008	615.036
OFUSG10540.1	449.517	6.82728	1.29989	4.88943	1.0113e-06	8.25547e-06	.	.	.	.	.	.	.	.	.	.	.	ccgccactacgctcatatactgttcccacatcagagaaacattcgattgtAAGGATGATACGATTACACCAAATAATTGGCTCCGCAGCGATTTTGACAATACTGGCAGCCTTCTGCTCGGCTCAAGCGTCGGAAATGATATCACCACTAGATGACGACATCATGGAGTCCCCATGGCAACAAAACACATTCCTGACTACCAAACGACAAGCTAGATGGAGACAAGTTGATATGTGTAATTGTTGTAAGCAATTCCCATTTTCATTTTGCTGTGACGGCTGTATTAGACTCCGCCAGATAGCAGTCACAAAAACAGATTTCGGAGAAAATAAGGGATCGACTCCTTTGTGGAAGAACAAATTTTGTGAATGTTGCTCAACGAAAAACTCTCCGAGATGC…	PPLRSYTVPTSEKHSIVRMIRLHQIIGSAAILTILAAFCSAQASEMISPLDDDIMESPWQQNTFLTTKRQARWRQVDMCNCCKQFPFSFCCDGCIRLRQIAVTKTDFGENKGSTPLWKNKFCECCSTKNSPRCCQLCTIF	1.03725	1.08625	545.95	122.483	764.516	153.501	990.343	129.243	1322.82	1330.39	4318.95	1834.17	611.065
OFUSG09479.2	628.82	6.81587	1.21561	5.5962	2.19106e-08	2.36169e-07	.	.	.	.	.	.	.	.	.	.	.	AAAATATTCAAGTCAAAGCAGGGTTTGAAGTCACGAGAAGGGCTGTTATAAGTTGACCAATATTATCGATTGTTATTGTTGTTTTTTCTAAATTTACTTCTACTTGATTTGTGTACATTTTGTGAAGAAACGGACTGAACGTAGACTCGTTTCAATTGGTTTAAGAATAAACTCATTTTATTTTGTTTAAATATTGCACTACACTAATACTAGCTTTCGTTGGTTTACATTGCGTCCATGGCAACGGCCATTCATTGAAAGGTGGCCCATTGAAAGCTAAGAGCTGTACAAAAATATTAGGCTTAGTGTATAGGCTGAACACTTGATGAACAGTTTATAAACACAATAAAACAGATTATCATATCCTCAAAAAGATGAATTGAAGAAGAATAACATAGC…	MSDNDSDAGSEAPSGAGSAFDVDPSKLIENMSEKEKKAWDKGAKKWRLFMDFLLRHVAIVTFKYNTFEQEEMTAFLQAMEKAEYLRATVPDVTKKKKKKLRKRKVTPVTPKDPRVKTYKDMQTAADLLQAHRFYAESHRLRFVMDLTGRLRGLNMIAKGFFKALKKCKVPGIDKFKHYLDYWRGFTIRTYDYTEVKMKGIDPDEYNIWPATIRTAIYLAQKFLKLSSDNTGLQLMTEDPKVLRQHMTAADFTVAQRIEDLLAKKVVSESQNFVLGAQSLLGLAPKKPEDEKKEIVDPTELENIDPELLRPIPDYGLLCELPEEVPKEKKKKKKGKKGKGKGKGRGMFSSAKKKKKK	0	7.51935	1489.51	228.458	3077.42	2786.79	1719.82	1366.62	1472.45	1202.75	1986.83	1069.51	565.186
OFUSG07526.1	472.126	6.81263	0.588055	11.4626	2.03309e-30	2.02998e-28	RT07201P-RELATED	MLRP2_ACRMI^MLRP2_ACRMI^Q:2-7924,H:26-2594^33.714%ID^E:0^RecName: Full=MAM and LDL-receptor class A domain-containing protein 2;^Eukaryota; Metazoa; Cnidaria; Anthozoa; Hexacorallia; Scleractinia; Astrocoeniina; Acroporidae; Acropora`MLRP2_ACRMI^MLRP2_ACRMI^Q:2-6775,H:553-2802^35.447%ID^E:0^RecName: Full=MAM and LDL-receptor class A domain-containing protein 2;^Eukaryota; Metazoa; Cnidaria; Antho…	MLRP2_ACRMI^MLRP2_ACRMI^Q:2-7924,H:26-2594^33.714%ID^E:0^RecName: Full=MAM and LDL-receptor class A domain-containing protein 2;^Eukaryota; Metazoa; Cnidaria; Anthozoa; Hexacorallia; Scleractinia; Astrocoeniina; Acroporidae; Acropora`MLRP2_ACRMI^MLRP2_ACRMI^Q:2-6775,H:553-2802^35.447%ID^E:0^RecName: Full=MAM and LDL-receptor class A domain-containing protein 2;^Eukaryota; Metazoa; Cnidaria; Antho…	PF00629.24^MAM^MAM domain, meprin/A5/mu^1-143^E:7e-22`PF00629.24^MAM^MAM domain, meprin/A5/mu^176-334^E:2.7e-36`PF00629.24^MAM^MAM domain, meprin/A5/mu^341-497^E:5.2e-40`PF00629.24^MAM^MAM domain, meprin/A5/mu^502-662^E:2.4e-41`PF00629.24^MAM^MAM domain, meprin/A5/mu^697-853^E:4.6e-34`PF00629.24^MAM^MAM domain, meprin/A5/mu^859-1018^E:3.8e-33`PF00629.24^MAM^MAM domain, meprin/A5/mu^1024-1189^E:1.…	.	.	.	PTHR23282:SF101	GO:0005576^cellular_component^extracellular region`GO:0016020^cellular_component^membrane	GO:0005576^cellular_component^extracellular region`GO:0016020^cellular_component^membrane	GO:0016020^cellular_component^membrane`GO:0005515^molecular_function^protein binding	GGACTGGAACATTGGACGTGGCTACGTTATGACAAGATACGGTGGACCTGGTACTGACCACACCAAAGGGACAGCCCAAGGTCAATACGCCTTTGTGGATATTACAAACAAAAACAATAACGATAAGGCATCATTGCTCAGTGAAGTATTTTCTCCAACGAGTTCTAAAGGAATGTGCCTCACATTCTGGTTTCATATGGACAAAGACCTCGGTTTTATCCGAGTATTTTTGGAGCAACTCGCAGGCACGGGGAACAATATTACGGTTCCTCTATACGCATTGACCAATAACTGGCAAAACAAATGGAACTATGGGCAGGTTGGCTATTCAAGTCAATACGACTATTGGCTTAGAATTGAGGTTATGAAGGACTACGAGGGTAAAGGATCGATTGCGAT…	DWNIGRGYVMTRYGGPGTDHTKGTAQGQYAFVDITNKNNNDKASLLSEVFSPTSSKGMCLTFWFHMDKDLGFIRVFLEQLAGTGNNITVPLYALTNNWQNKWNYGQVGYSSQYDYWLRIEVMKDYEGKGSIAIDDIIIRNDNCDVIPYDANIFGTTATPTTLQSTPLPRVPSRYDCDFEIGTCDWTRDSDNDFDWMRIQATSPDNDGGPTFDHTTKTENGWFMTIPFGTIRTANDSARIRSYIVPPTEGICLSFWFYMYGPLVNTLNVYIASVNQDKGLPVWTRKGSRGNEWHQGELTIRTNYTSQILFEGMRGVLWNGVIALDDVMVDMGPCKGDLYSLCDFESGDMCGYTSLLGSKYNWTVNSGQTPTRFTGPSVDHTFGTSTGQYLYARSSGRKPL…	4.1788	14.9898	1357	866.024	231.299	358.735	640.809	586.519	2080.94	2891.42	916.316	1991.23	764.446
OFUSG18500.1	591.087	6.76461	0.613821	10.957	6.14814e-28	5.02911e-26	EUKARYOTE SPECIFIC DSRNA BINDING PROTEIN	DSRAD_HUMAN^DSRAD_HUMAN^Q:1300-2532,H:839-1226^42.373%ID^E:9.77e-81^RecName: Full=Double-stranded RNA-specific adenosine deaminase;^Eukaryota; Metazoa; Chordata; Craniata; Vertebrata; Euteleostomi; Mammalia; Eutheria; Euarchontoglires; Primates; Haplorrhini; Catarrhini; Hominidae; Homo	DSRAD_HUMAN^DSRAD_HUMAN^Q:1300-2532,H:839-1226^42.373%ID^E:9.77e-81^RecName: Full=Double-stranded RNA-specific adenosine deaminase;^Eukaryota; Metazoa; Chordata; Craniata; Vertebrata; Euteleostomi; Mammalia; Eutheria; Euarchontoglires; Primates; Haplorrhini; Catarrhini; Hominidae; Homo	PF00035.27^dsrm^Double-stranded RNA binding motif^6-72^E:1.3e-15`PF00035.27^dsrm^Double-stranded RNA binding motif^94-162^E:2.3e-09`PF00035.27^dsrm^Double-stranded RNA binding motif^189-251^E:3.6e-06`PF02137.19^A_deamin^Adenosine-deaminase (editase) domain^321-668^E:7.5e-80	.	.	KEGG:hsa:103`KO:K12968	PTHR10910	GO:0005737^cellular_component^cytoplasm`GO:0016020^cellular_component^membrane`GO:0005730^cellular_component^nucleolus`GO:0005654^cellular_component^nucleoplasm`GO:0005634^cellular_component^nucleus`GO:0044530^cellular_component^supraspliceosomal complex`GO:0003677^molecular_function^DNA binding`GO:0003726^molecular_function^double-stranded RNA adenosine deaminase activity`GO:0003725^molecular_fu…	GO:0005737^cellular_component^cytoplasm`GO:0016020^cellular_component^membrane`GO:0005730^cellular_component^nucleolus`GO:0005654^cellular_component^nucleoplasm`GO:0005634^cellular_component^nucleus`GO:0044530^cellular_component^supraspliceosomal complex`GO:0003677^molecular_function^DNA binding`GO:0003726^molecular_function^double-stranded RNA adenosine deaminase activity`GO:0003725^molecular_fu…	GO:0003723^molecular_function^RNA binding`GO:0004000^molecular_function^adenosine deaminase activity`GO:0006396^biological_process^RNA processing	CTTTCACGTATGACTATCCCATTTGTGCCTACTTCTAAATTTAGCCATAAGTTTGGTTTCCAAAGAGGAAACTTTGATTCAAATGTAGTCACTTTCGTTTTCTTGACCGATTCGTGATGGGGAAAGTTATCGCTAATGAAACGAAACTGATTTGATTCTGCTAAACACATTTGCTGAGGAAGTCATCCCCGAGGCAACATCAGGGGATCAAATACCATCAGACTGACATAAAGGAAAACATTGATAAATCAAATTGACACGTTGAATTACTATATCGTAATGAGCACGTTGGATTGACTGAACTAGAAATGCATTGAGAGCCCATTCAGATGTTCCTGGAGAAAGTCAGATGATAACCTACAATTGTTTAGACCCAACCAATCTGCATGACTTCAGTCC…	MSITNYKGRLNELTQKRGKSPPQYKVQSKEGMDHCPYFVVNVYIGDQLFGTGKATKKKDSEQQAAAEALKALGVDIDLNVTQDTNGVNPNAINPIGELQEYYQARHLRCPVYDIASRGSDHLKKFTAKVTVTINNEDKEYTSGGNDFNKKDAQKSAAKAAIDDIKKKGLWTKCISEDNDSKYQDLSKNPISALMEYCQKYKHRVDDPIVRGGPGTYFSYAWVIDGVIYPSSKTRRKDTAKSDSAKLALDALLKQATRMDDTSDTASIMTDEDKIEALVMEKFRSLVHENPQIIDCDKGRTVVAGIIMREVRSNCTIDSVVSIGTGTRCIMGVNRSYEGLTVNDCHAEVIARRGLLRFLYSQLFQYYGSQGAFSSNIYEPMSRSRKLKIKDTVTFHLYIS…	30.2669	12.874	2553.03	2710.19	3183.61	2930.53	1193.65	1189.37	486.968	446.713	273.442	350.134	571.218
OFUSG04821.1	1232.53	6.76031	0.471276	14.2735	3.2007e-46	9.25794e-44	TUBULIN ALPHA CHAIN	TBA2_PATVU^TBA2_PATVU^Q:183-1472,H:1-430^94.419%ID^E:0^RecName: Full=Tubulin alpha-2/alpha-4 chain;^Eukaryota; Metazoa; Spiralia; Lophotrochozoa; Mollusca; Gastropoda; Patellogastropoda; Patelloidea; Patellidae; Patella	TBA2_PATVU^TBA2_PATVU^Q:183-1472,H:1-430^94.419%ID^E:0^RecName: Full=Tubulin alpha-2/alpha-4 chain;^Eukaryota; Metazoa; Spiralia; Lophotrochozoa; Mollusca; Gastropoda; Patellogastropoda; Patelloidea; Patellidae; Patella	PF00091.26^Tubulin^Tubulin/FtsZ family, GTPase domain^3-213^E:1.7e-68`PF03953.18^Tubulin_C^Tubulin C-terminal domain^263-392^E:3.7e-52	.	.	.	PTHR11588:SF390	GO:0005737^cellular_component^cytoplasm`GO:0005874^cellular_component^microtubule`GO:0005525^molecular_function^GTP binding`GO:0003924^molecular_function^GTPase activity`GO:0005200^molecular_function^structural constituent of cytoskeleton`GO:0007017^biological_process^microtubule-based process	GO:0005737^cellular_component^cytoplasm`GO:0005874^cellular_component^microtubule`GO:0005525^molecular_function^GTP binding`GO:0003924^molecular_function^GTPase activity`GO:0005200^molecular_function^structural constituent of cytoskeleton`GO:0007017^biological_process^microtubule-based process	GO:0003924^molecular_function^GTPase activity	CAAATTTCCACAGGTATTTAACCAATGGGTTTTGATATCTATGCCAAAAGTGTTGTCATCATTTTTGAAGATAAAACCAGTTGGAAATTTTGCAGCCGTTATATCTGACTAGCTGCTCCATTGGAACGCAACAAGTCTTACTGATCAACTGATATTTTTGGGACAACACCTTAAAAAGCAAAATGAGGGAATGCATTTCAGTCCACATTGGCCAAGCGGGTGTTCAAATGGGCAATGCCTGCTGGGAGTTGTACTGCCTCGAGCATGGAATCCAACCAGATGGTCAGATGCCAAGTGACAAAACCATTGGAGGCGGTGATGACTCCTTCAATACGTTCTTCAGTGAGACAGGATCAGGAAAGCATGTCCCAAGAGCGGTCATGATAGATCTTGAACCCA…	MRECISVHIGQAGVQMGNACWELYCLEHGIQPDGQMPSDKTIGGGDDSFNTFFSETGSGKHVPRAVMIDLEPNVVDEIRTGTYRQLFHPEQLITGKEDAANNYARGHYTVGKEYIDQCIDRIRKLADNCTGLQGFLLFHSFGGGTGSGFTSLLMERLSVDYGKKSKLEFAIYPAPQISTAIVEPYNSILTTHTTLEHTDCAFMVDNEAIYDICRRNLDIARPTYTNLNRLIGQIVSSITASLRFDGSLNVDLTEFQTNLVPYPRIHFPLATYAPVISAEKAFHEQITVAEITNACFEPQNQMVKCDPRHGKYMACCLLYRGDVVPKDVNVAIASIKTKRTIQFVDWCPTGFKVGINYQPPTVVPGGDLAKVQRAVCMLGNTTAIAEAWARLDHKFDLMY…	33.3421	11.841	3519.07	1706.69	6370.64	4032.96	5824.43	5058.91	2789.76	2569.05	622.217	604.6	107.971
OFUSG00597.1	47.6771	6.73364	1.31053	4.70236	2.57173e-06	1.96233e-05	HISTAMINE RECEPTOR-RELATED G-PROTEIN COUPLED RECEPTOR	DRD2_CHLAE^DRD2_CHLAE^Q:306-812,H:22-178^27.746%ID^E:5.41e-06^RecName: Full=D(2) dopamine receptor;^Eukaryota; Metazoa; Chordata; Craniata; Vertebrata; Euteleostomi; Mammalia; Eutheria; Euarchontoglires; Primates; Haplorrhini; Catarrhini; Cercopithecidae; Cercopithecinae; Chlorocebus	DRD2_CHLAE^DRD2_CHLAE^Q:306-812,H:22-178^27.746%ID^E:5.41e-06^RecName: Full=D(2) dopamine receptor;^Eukaryota; Metazoa; Chordata; Craniata; Vertebrata; Euteleostomi; Mammalia; Eutheria; Euarchontoglires; Primates; Haplorrhini; Catarrhini; Cercopithecidae; Cercopithecinae; Chlorocebus	PF10328.10^7TM_GPCR_Srx^Serpentine type 7TM GPCR chemoreceptor Srx^41-174^E:0.00036`PF00001.22^7tm_1^7 transmembrane receptor (rhodopsin family)^49-291^E:8.1e-16	.	.	.	PTHR24249	GO:0016021^cellular_component^integral component of membrane`GO:0005886^cellular_component^plasma membrane`GO:0045202^cellular_component^synapse`GO:0004952^molecular_function^dopamine neurotransmitter receptor activity`GO:0004930^molecular_function^G protein-coupled receptor activity`GO:0007195^biological_process^adenylate cyclase-inhibiting dopamine receptor signaling pathway`GO:1990384^biologic…	GO:0016021^cellular_component^integral component of membrane`GO:0005886^cellular_component^plasma membrane`GO:0045202^cellular_component^synapse`GO:0004952^molecular_function^dopamine neurotransmitter receptor activity`GO:0004930^molecular_function^G protein-coupled receptor activity`GO:0007195^biological_process^adenylate cyclase-inhibiting dopamine receptor signaling pathway`GO:1990384^biologic…	GO:0004930^molecular_function^G protein-coupled receptor activity`GO:0007186^biological_process^G protein-coupled receptor signaling pathway`GO:0016021^cellular_component^integral component of membrane	ATGGAACTGACGGGGATGTGCACCTATATAAGCCAATGCAAAATTATATCAGCTAGTTAGAAGCGCACAGTCGTTTGAATAGTGATTGGTAATTGGCAATTATAATAGAACAGACGCTCTGCTTTCAACTCATTTTCTATCTAAGAATCACAGACAGTGTTTCTATGAAGTGATTCAAAGAGGATTATAAATAATTCTACTTTATCTATAACGGAGAATACTTGGAGGATATTTGCGGAAACGTCGATTCTACACGTAAGACGATGGATTACTTGGGTGAAAACTTTACATTTTATTTGAGCCTTTTCAATTCTTCTGACCATATTTCACCGTCAATGGAAGATGAAACATCTTTGATACGATTCATAACGATTGCAACAATTCTTTGCTTTGTTGCGA…	MDYLGENFTFYLSLFNSSDHISPSMEDETSLIRFITIATILCFVAIVVNTVSMIAIKFIPGNLTSTHLLFLNLSVADLFGSLSTYLEIIPRMDVLWTHEDELSSSFKRIAFTQAFSFIFFTLFYMEGALTLFLISVLRYIALSQPLVYNRIASKRNISIYIVLSWIVSILVSLPGILAFKFDDLPFLEYWDYIWPCILCFILIIVIILYCRVSKGLWRRSSSANSRQSANDSYKAFVTSLILVVALVLFSLPYIAVKLIRVHIFSSTLLMVHYNFICYLPYINFIMDPVVYGLRTRDIRAGYVRLGESSGCFKGRMRLTPRDVKSKENSAQTDVSAMPLTATTSIIHVDKTTTKSSNC	2.08499	0	282.445	160.701	19.3951	40.2217	39.7152	27.4449	34.4612	44.1258	192.795	92.2376	344.294
OFUSG16848.2	1949.61	6.72808	1.15285	5.97217	2.34112e-09	2.94287e-08	FAMILY NOT NAMED	M130_STRPU^M130_STRPU^Q:979-2082,H:378-737^29.199%ID^E:1.95e-38^RecName: Full=Mesenchyme-specific cell surface glycoprotein;^Eukaryota; Metazoa; Echinodermata; Eleutherozoa; Echinozoa; Echinoidea; Euechinoidea; Echinacea; Echinoida; Strongylocentrotidae; Strongylocentrotus`M130_STRPU^M130_STRPU^Q:568-975,H:99-229^27.007%ID^E:9.65e-07^RecName: Full=Mesenchyme-specific cell surface glycoprotein;^Eu…	M130_STRPU^M130_STRPU^Q:979-2082,H:378-737^29.199%ID^E:1.95e-38^RecName: Full=Mesenchyme-specific cell surface glycoprotein;^Eukaryota; Metazoa; Echinodermata; Eleutherozoa; Echinozoa; Echinoidea; Euechinoidea; Echinacea; Echinoida; Strongylocentrotidae; Strongylocentrotus`M130_STRPU^M130_STRPU^Q:568-975,H:99-229^27.007%ID^E:9.65e-07^RecName: Full=Mesenchyme-specific cell surface glycoprotein;^Eu…	.	sigP:1^20^0.527^YES	.	.	PTHR46928	GO:0031225^cellular_component^anchored component of membrane`GO:0005886^cellular_component^plasma membrane	GO:0031225^cellular_component^anchored component of membrane`GO:0005886^cellular_component^plasma membrane	.	CGCCTTTATATTACCTGATCCAATCAAAATCAGTCAGTGTTGAACTATTTATGTACTGATGGTGTTTACACTTTAGTCATGCACATGTAAGTTTGCGTTTCACACGGATGCAATTGAAAGAATTAGTACGCACTGACACGTCGCATGTGACATGAAAACTAAATTTTAAGAAGCAGAAATTAAAAGATCGCAAACGCCGATTTGTTTTAAATAAAAAAGGTTTACGGAATGCCCATATGAACCACATGATGCAAGGATAGCAACAGAAAACATTCGCGTAATCGAGTATTGTGATCGAAAAGAGCGCCAGCTGTGTTGCACAACCATTCACATTGTCACCAACTGCCATCTCCACTTGGAAGCAACACTCTGACCATGCCCCCGATGGCATTACTTTAT…	MPPMALLYLVLTCGVNKVSTNVGLSHVSTIYLPFMYTDSKPTFDIRQDAAAQSSYDAARGVVYTVGYSGVLHVIDVTNVNNLNIIHKLEFHDFYKLMATDVQVCGSYVAVTLQHKEILDNGTLRIYTAYNRMRENMNLLREETIGVFPTQLVFTKDCTILLTANEGRLTKSMLTHTPYHDAEGTISIIKFSTGDLGYGPATVKTLDFKRFNARSAEYVSKGVRFLYNGLEQTDLQSTFSQDMEPEYITINAAETKAYVCLQENNAVAMVDIATESIDEIHPLGYKDWSQYKLDASDVDGVRMYGYEVYGMYQPDNIKYFTWDDKEFIVSANEGDGKAYRVDSHGLTWSETIRGQVFSKESLIDDSVSEDLKRDLRDPKKLGNLVFSFKDGEVKDSATNK…	25.0431	0	2067.68	1899.16	9434.21	7700.64	6972.49	12198.5	4304.27	5748.05	885.398	761.068	135.368
OFUSG23576.1	248.852	6.7268	0.568373	11.5403	8.26074e-31	8.45882e-29	TRANSMEMBRANE EMP24 DOMAIN-CONTAINING PROTEIN 6	TMED6_BOVIN^TMED6_BOVIN^Q:228-812,H:41-239^29%ID^E:2.71e-19^RecName: Full=Transmembrane emp24 domain-containing protein 6;^Eukaryota; Metazoa; Chordata; Craniata; Vertebrata; Euteleostomi; Mammalia; Eutheria; Laurasiatheria; Artiodactyla; Ruminantia; Pecora; Bovidae; Bovinae; Bos	TMED6_BOVIN^TMED6_BOVIN^Q:228-812,H:41-239^29%ID^E:2.71e-19^RecName: Full=Transmembrane emp24 domain-containing protein 6;^Eukaryota; Metazoa; Chordata; Craniata; Vertebrata; Euteleostomi; Mammalia; Eutheria; Laurasiatheria; Artiodactyla; Ruminantia; Pecora; Bovidae; Bovinae; Bos	PF01105.25^EMP24_GP25L^emp24/gp25L/p24 family/GOLD^46-225^E:1.7e-23	sigP:1^23^0.794^YES	.	KEGG:bta:533277`KO:K20351	PTHR22811:SF45	GO:0030134^cellular_component^COPII-coated ER to Golgi transport vesicle`GO:0005783^cellular_component^endoplasmic reticulum`GO:0005789^cellular_component^endoplasmic reticulum membrane`GO:0005793^cellular_component^endoplasmic reticulum-Golgi intermediate compartment`GO:0005794^cellular_component^Golgi apparatus`GO:0016021^cellular_component^integral component of membrane`GO:0006888^biological_p…	GO:0030134^cellular_component^COPII-coated ER to Golgi transport vesicle`GO:0005783^cellular_component^endoplasmic reticulum`GO:0005789^cellular_component^endoplasmic reticulum membrane`GO:0005793^cellular_component^endoplasmic reticulum-Golgi intermediate compartment`GO:0005794^cellular_component^Golgi apparatus`GO:0016021^cellular_component^integral component of membrane`GO:0006888^biological_p…	.	TTTTTCTATTAACATCACTTTGATTACAATTGAAGTCGCTGATTGATCAACTCTAAGGGTTAATTAACATAAAATATGCACGACGTGTACTTAGTATAACAATGGCAGCCTCCTATCACGCATGTGTTGTATTTTTATTTCTACCAATATTAATACAATACTCAAACTCTGAGGATGTTTTAGGGATACAGACGGATGATTTTGACTTCGATGGACTCCCCGGGGCCCAGCATGAATTCCGCATTGAAGTGGGAGCTGGAAAAGAGGAATGTTTTTTCCAGAAAATAGCTAAGGGAGCGAATCTTCATGTTACATTTGAGGTGCTACGAGGGGCAGACAGAAACATTGACTTCATCATAAAGCGAGCTGACGGTAGCATATTTGATAGCCATCTATGGA…	MAASYHACVVFLFLPILIQYSNSEDVLGIQTDDFDFDGLPGAQHEFRIEVGAGKEECFFQKIAKGANLHVTFEVLRGADRNIDFIIKRADGSIFDSHLWTHEGTTEKLIEEEGPLAFCFENYHSRFASKLVFMFLDVWHEADWMEFDRNNEQIDISVDTMRTTLQKVDTSISKMRNFQAISRKHVIADWYLSLANNKYIQNLSIAMSCIIICTSCLQTYFVRKLFATKNVTSTQKPRA	8.32264	3.23927	851.815	507.771	995.886	728.36	663.409	675.678	829.441	773.01	165.62	201.506	266.078
OFUSG16270.1	301.288	6.6803	1.05402	6.18276	6.29907e-10	8.57927e-09	SYNTHASE 2, PUTATIVE-RELATED	CHS2_CAEEL^CHS2_CAEEL^Q:2771-3895,H:856-1256^33.333%ID^E:6.07e-63^RecName: Full=Chitin synthase chs-2 {ECO:0000305};^Eukaryota; Metazoa; Ecdysozoa; Nematoda; Chromadorea; Rhabditida; Rhabditina; Rhabditomorpha; Rhabditoidea; Rhabditidae; Peloderinae; Caenorhabditis`CHS2_CAEEL^CHS2_CAEEL^Q:947-1735,H:493-833^24.571%ID^E:5.74e-15^RecName: Full=Chitin synthase chs-2 {ECO:0000305};^Eukaryota; Metazoa…	CHS2_CAEEL^CHS2_CAEEL^Q:2771-3895,H:856-1256^33.333%ID^E:6.07e-63^RecName: Full=Chitin synthase chs-2 {ECO:0000305};^Eukaryota; Metazoa; Ecdysozoa; Nematoda; Chromadorea; Rhabditida; Rhabditina; Rhabditomorpha; Rhabditoidea; Rhabditidae; Peloderinae; Caenorhabditis`CHS2_CAEEL^CHS2_CAEEL^Q:947-1735,H:493-833^24.571%ID^E:5.74e-15^RecName: Full=Chitin synthase chs-2 {ECO:0000305};^Eukaryota; Metazoa…	PF03142.16^Chitin_synth_2^Chitin synthase^900-1118^E:6.6e-21`PF13632.7^Glyco_trans_2_3^Glycosyl transferase family group 2^901-1096^E:5.1e-11	.	.	.	PTHR22914:SF20	GO:0071944^cellular_component^cell periphery`GO:0030428^cellular_component^cell septum`GO:0016021^cellular_component^integral component of membrane`GO:0005886^cellular_component^plasma membrane`GO:0004100^molecular_function^chitin synthase activity`GO:0006031^biological_process^chitin biosynthetic process`GO:0007275^biological_process^multicellular organism development`GO:0061063^biological_proce…	GO:0071944^cellular_component^cell periphery`GO:0030428^cellular_component^cell septum`GO:0016021^cellular_component^integral component of membrane`GO:0005886^cellular_component^plasma membrane`GO:0004100^molecular_function^chitin synthase activity`GO:0006031^biological_process^chitin biosynthetic process`GO:0007275^biological_process^multicellular organism development`GO:0061063^biological_proce…	.	GGAAATTTGGAAAAGTGATTTAGATAGCTGGCCAAGGGAACTAAGAAGGTGGGGTCCAGATGGAGTAAAGCTGGATTTGTAAAGTATGTGCTGCATACAACTATGGAAAGGTGTGGTTTGCACTCTGCTGTTTGTGCTGATGCTAGCATCGCTGGTGTTCAACAAGGCGTCACTAATTTGGCTCTTGGGTGGAACAAAGATAAACAACGTTCCTTTGGAAACATGGTATGCTGCATTTGCGCTTGTATTCCTTGTACCAGAACTGTTTGCAGTAATAAAGGTTCTATGGAACACATCTTTTATAAAACAAACCAGCACTCACCAATGGCCGAGTGGAGTGGCTCTACTAGTGGGATTTTTGGTGAGTTTCGCGGAGGTGAGCAGTTACCTGATGTTTAC…	MCCIQLWKGVVCTLLFVLMLASLVFNKASLIWLLGGTKINNVPLETWYAAFALVFLVPELFAVIKVLWNTSFIKQTSTHQWPSGVALLVGFLVSFAEVSSYLMFTLEIAPRLPIQLLMPLLSSVFAVALCYEQWESYMIKRAKDQEVHFDGNFTLAHKPADTIPDDANWKRLVKTLFGLSGIWATCAIAAVGVLTSIMPWFQALCLPTSLSLLSLAWSPKVQMYIVRSPDGTFQGRWKAMCLYTVFKIIVLMVGISIIMVIRLQQHHILDSNFFVKLGDGLYGCRQKEILYPLLIHFGSSFCGHLTGFAAATLCVPNIGMTLPSVLATPIAIAIGMYFCIPSFQLLDELTCYSSNISIWCMFALASIAWVAPYLILGTNLTKQCAVLLKPMDELFIQSS…	7.30996	0	758.843	424.262	1598.52	1084.72	1042.42	1141.24	726.325	802.753	185.974	205.409	116.66
OFUSG08756.1	165.998	6.67018	1.20762	5.37562	7.63209e-08	7.58801e-07	RAS-LIKE PROTEIN FAMILY MEMBER 12	RASLC_DANRE^RASLC_DANRE^Q:862-1608,H:22-255^44.4%ID^E:3.27e-59^RecName: Full=Ras-like protein family member 12;^Eukaryota; Metazoa; Chordata; Craniata; Vertebrata; Euteleostomi; Actinopterygii; Neopterygii; Teleostei; Ostariophysi; Cypriniformes; Cyprinidae; Danio	RASLC_DANRE^RASLC_DANRE^Q:862-1608,H:22-255^44.4%ID^E:3.27e-59^RecName: Full=Ras-like protein family member 12;^Eukaryota; Metazoa; Chordata; Craniata; Vertebrata; Euteleostomi; Actinopterygii; Neopterygii; Teleostei; Ostariophysi; Cypriniformes; Cyprinidae; Danio	PF00071.23^Ras^Ras family^23-182^E:1.7e-35`PF08477.14^Roc^Ras of Complex, Roc, domain of DAPkinase^23-137^E:7.2e-09	.	.	KEGG:dre:393366`KO:K07854	PTHR24070:SF252	GO:0005886^cellular_component^plasma membrane`GO:0005516^molecular_function^calmodulin binding`GO:0019003^molecular_function^GDP binding`GO:0005525^molecular_function^GTP binding`GO:0003924^molecular_function^GTPase activity`GO:0007265^biological_process^Ras protein signal transduction	GO:0005886^cellular_component^plasma membrane`GO:0005516^molecular_function^calmodulin binding`GO:0019003^molecular_function^GDP binding`GO:0005525^molecular_function^GTP binding`GO:0003924^molecular_function^GTPase activity`GO:0007265^biological_process^Ras protein signal transduction	GO:0003924^molecular_function^GTPase activity`GO:0005525^molecular_function^GTP binding	GTATAATGAAAAGGACAGCCTATGGTGTCTATCTTATTTTTAATTTATGATTAGTAATGATGGTTAGAAATGTTATGTGGAACAGATAGGTGTCACCACCAGATCTACAGACTATCAAGACTAAGAACAACAAGAATCATATTTCCCATCACCTCATCATAGAATATATCAGGCTTGTAAAGCTATAATAAACAATCAATGCAGACCCTGGCGCCACCTTTTTGGAAACACTTTGATTAAGTGAGGAATCTACACATCAACAATCTAACTGAATCAGTATATTGCCAGCAAAGGAAGATGAGCTAAAACAACAACTTCAATGTGGAGTGTAGTAAAGGAAACTAATGAAGTGCAGTTACTATAGCAAATGATCAAGTGTCTATCATTGCTTCATTCTCT…	MKETMSGRKTLQRNGSGGTEYHIALLGALGVGKSALTVKYITKRFIMEYDPFLEDTYTKHETMEKEDITLKIMDTFEKEESNPDRYLKWADAFIVVYSITGRQSFEGARVYLDSIVKFQKSSGKDIPITLVGNKVDLERYRQVSKSEGKTLATQYECLFYETSAAEDYELVNKIFEGTLRELCRIKERQIPLQPLYITEDKPTISALLSPTSPGPFSGLHSTRRAKSPKVTSSDIKDTRKDEKDSSNTKFYQKKPTTFRILKGFKLFN	7.3045	0	782.3	466.176	780.517	555.638	255.588	260.021	271.563	236.271	297.814	152.463	308.888
OFUSG20396.1	82.1684	6.6583	1.02169	5.20399	1.9506e-07	1.80263e-06	GALACTOSIDE 2-L-FUCOSYLTRANSFERASE	FUT1_PANTR^FUT1_PANTR^Q:378-1223,H:83-362^29.72%ID^E:2.35e-38^RecName: Full=Galactoside alpha-(1,2)-fucosyltransferase 1 {ECO:0000250|UniProtKB:P19526};^Eukaryota; Metazoa; Chordata; Craniata; Vertebrata; Euteleostomi; Mammalia; Eutheria; Euarchontoglires; Primates; Haplorrhini; Catarrhini; Hominidae; Pan	FUT1_PANTR^FUT1_PANTR^Q:378-1223,H:83-362^29.72%ID^E:2.35e-38^RecName: Full=Galactoside alpha-(1,2)-fucosyltransferase 1 {ECO:0000250|UniProtKB:P19526};^Eukaryota; Metazoa; Chordata; Craniata; Vertebrata; Euteleostomi; Mammalia; Eutheria; Euarchontoglires; Primates; Haplorrhini; Catarrhini; Hominidae; Pan	PF01531.17^Glyco_transf_11^Glycosyl transferase family 11^80-359^E:7.3e-41	.	.	KEGG:ptr:468947`KO:K00718	PTHR11927	GO:0032580^cellular_component^Golgi cisterna membrane`GO:0016021^cellular_component^integral component of membrane`GO:0031127^molecular_function^alpha-(1,2)-fucosyltransferase activity`GO:0008107^molecular_function^galactoside 2-alpha-L-fucosyltransferase activity`GO:0005975^biological_process^carbohydrate metabolic process`GO:0036065^biological_process^fucosylation`GO:0021772^biological_process^…	GO:0032580^cellular_component^Golgi cisterna membrane`GO:0016021^cellular_component^integral component of membrane`GO:0031127^molecular_function^alpha-(1,2)-fucosyltransferase activity`GO:0008107^molecular_function^galactoside 2-alpha-L-fucosyltransferase activity`GO:0005975^biological_process^carbohydrate metabolic process`GO:0036065^biological_process^fucosylation`GO:0021772^biological_process^…	GO:0008107^molecular_function^galactoside 2-alpha-L-fucosyltransferase activity`GO:0005975^biological_process^carbohydrate metabolic process`GO:0016020^cellular_component^membrane	CTACAATTTCAGTCAATGTATCCACCATTTGTCCACTGTACAACGTTTTGCAAATATGTGATCAAATGTTTAAAGCAGTTTCAAACAGAAGATAGACAAGTTATGACGAATCGTTGAGAATGAAATCCCGTGATTTTTGTAAAGGTTGTAGGAGATTGTCTGGGAGGTATGCGATGATATGCTGTATTATGCTATTTATTTCCTTGCCAATTTTCCCGTTTGTTTTGGTTGGACACATTGTTGTAGCAGAATGGCGAGTAAAGAACGAGCCGCATGTTAATAAATTTGCTCCTGTGGTTCTTGCAGAGTTTACGGACCAAGTATTCTCTGCCACTCGGGAGTCGGATACTCGTGATACAGGGAATATGTCGTACTTGACGGTAATGTTTTCAGGGGGAT…	MKSRDFCKGCRRLSGRYAMICCIMLFISLPIFPFVLVGHIVVAEWRVKNEPHVNKFAPVVLAEFTDQVFSATRESDTRDTGNMSYLTVMFSGGLGNRMFQYASLTCIAHHNKMQGHLPQGCILPEVFNIPNSELALSESIFSRPGINYPKFLEKSSYIWDKRTLRLNPKLNIELLGYFQSWKYFHSCKHKVRRQLSFKTDVVKAANMYLTQAANKAGEARPTFVSIHVRRGDITQVPHIAELGYTTATRQYFLNSMEYFKSRHKNIVFVVCSNDIKWSRENLSNNNNSIYFVDSGRDEVDLCILSRCNHSIISTGSYGWWGAWLASGEVTYYKHFPKPGSPLHKSFNPWDYFLPEWIGLD	0	1.07632	69.0225	115.863	274.734	359.895	200.231	390.772	197.153	269.389	81.332	127.159	129.541
OFUSG01141.1	336.058	6.6528	0.587451	11.1574	6.58887e-29	5.81333e-27	HOMEOBOX PROTEIN CEH-6	P3F2B_XENLA^P3F2B_XENLA^Q:66-1064,H:1-357^53.117%ID^E:2.06e-102^RecName: Full=POU domain, class 3, transcription factor 2-B;^Eukaryota; Metazoa; Chordata; Craniata; Vertebrata; Euteleostomi; Amphibia; Batrachia; Anura; Pipoidea; Pipidae; Xenopodinae; Xenopus; Xenopus	P3F2B_XENLA^P3F2B_XENLA^Q:66-1064,H:1-357^53.117%ID^E:2.06e-102^RecName: Full=POU domain, class 3, transcription factor 2-B;^Eukaryota; Metazoa; Chordata; Craniata; Vertebrata; Euteleostomi; Amphibia; Batrachia; Anura; Pipoidea; Pipidae; Xenopodinae; Xenopus; Xenopus	PF00157.18^Pou^Pou domain - N-terminal to homeobox domain^186-255^E:2.8e-38`PF00046.30^Homeodomain^Homeodomain^274-330^E:4.3e-18	.	.	KEGG:xla:779122`KO:K09365	PTHR11636:SF127	GO:0005634^cellular_component^nucleus`GO:0003700^molecular_function^DNA-binding transcription factor activity`GO:0043565^molecular_function^sequence-specific DNA binding`GO:0007420^biological_process^brain development`GO:0006357^biological_process^regulation of transcription by RNA polymerase II	GO:0005634^cellular_component^nucleus`GO:0003700^molecular_function^DNA-binding transcription factor activity`GO:0043565^molecular_function^sequence-specific DNA binding`GO:0007420^biological_process^brain development`GO:0006357^biological_process^regulation of transcription by RNA polymerase II	GO:0003700^molecular_function^DNA-binding transcription factor activity`GO:0006355^biological_process^regulation of transcription, DNA-templated`GO:0003677^molecular_function^DNA binding	GCTGTTTTAAAAGTCAGGACATAACGCATATATTGGATTGTTAAGAAGGACAGTGTATACAAATGATGGCCACGACGACTGCGAATCCATACGTCGTGAATAACACGGGTGGCATACCAACTAGCCTAGTACAAGGCTTGGACATAGAACGGGACACAATGCAAAACACTGGTTATATACACAGAGACGATATGAAATATATGTCAGCACAACAGAATGGACATCACCTGTCTCATCAATGGGGTGTTTTACAACACACTGATACTAGTCACTGGGGCCAAACTATGGCCCAGGCTCACCACATGTACGGCCGCGCCGAGCAGGACATTAAACCACAAGCAGAAGCTCCCCTGCATCACCGGGGGCCCGGGGGACAACAAATACACCCGGCTCACGGTT…	MMATTTANPYVVNNTGGIPTSLVQGLDIERDTMQNTGYIHRDDMKYMSAQQNGHHLSHQWGVLQHTDTSHWGQTMAQAHHMYGRAEQDIKPQAEAPLHHRGPGGQQIHPAHGWATPVTSMQTHLGMNMNLSNGGLGAPPLQHPGYGMNGMMSPSQGLHHLRDIRESDGSEYADHHDLASDEDAPTSDDLEAFAKQFKQRRIKLGFTQADVGLALGTLYGNVFSQTTICRFEALQLSFKNMCKLKPLLQKWLEEADSTTGNPTSIDKIAAQGRKRKKRTSIEVTVKGALENHFLKVPKPAAQEIQHLADSLQLEKEVVRVWFCNRRQKEKRMTPPVMGPNGEILLPDSMQNSPQSQHESPLHVNHGSPGSMHQHGGGSPLMQHTSIPSPYSVPPQSSTSP…	6.26022	9.66144	936.391	835.427	860.326	719.693	476.294	556.576	397.578	492.632	1076.02	1113.59	1569.81
OFUSG07253.1	48.0876	6.65237	1.2476	4.54267	5.55464e-06	3.9696e-05	HYALURONATE LYASE	CSLA_PEDHD^CSLA_PEDHD^Q:832-2202,H:234-672^24.792%ID^E:2.51e-27^RecName: Full=Chondroitinase-AC;^Bacteria; Bacteroidetes; Sphingobacteriia; Sphingobacteriales; Sphingobacteriaceae; Pedobacter	CSLA_PEDHD^CSLA_PEDHD^Q:832-2202,H:234-672^24.792%ID^E:2.51e-27^RecName: Full=Chondroitinase-AC;^Bacteria; Bacteroidetes; Sphingobacteriia; Sphingobacteriales; Sphingobacteriaceae; Pedobacter	PF08124.12^Lyase_8_N^Polysaccharide lyase family 8, N terminal alpha-helical domain^58-344^E:2.3e-13`PF02278.19^Lyase_8^Polysaccharide lyase family 8, super-sandwich domain^377-633^E:1.7e-50`PF02884.18^Lyase_8_C^Polysaccharide lyase family 8, C-terminal beta-sandwich domain^651-718^E:3.8e-10	sigP:1^22^0.858^YES	COG5492^ig domain protein group 2 domain protein	KEGG:phe:Phep_0786`KO:K19049	PTHR38481	GO:0005576^cellular_component^extracellular region`GO:0030246^molecular_function^carbohydrate binding`GO:0030341^molecular_function^chondroitin AC lyase activity`GO:0046872^molecular_function^metal ion binding`GO:0005975^biological_process^carbohydrate metabolic process	GO:0005576^cellular_component^extracellular region`GO:0030246^molecular_function^carbohydrate binding`GO:0030341^molecular_function^chondroitin AC lyase activity`GO:0046872^molecular_function^metal ion binding`GO:0005975^biological_process^carbohydrate metabolic process	GO:0016829^molecular_function^lyase activity`GO:0005576^cellular_component^extracellular region	GAACACTCAGTCATTGTACGAAACTAAAGTTTAACAATGAGGAGAGTTCATCCAATATTGAGTTTATTGTCCGTCGTTCTGATAATAAAATGCTGTGCTGCGGAATTGTCTGCAGTTGGTACCAATTTCCGTGCGTTGGCCATGCCAGAGAATGCTGCGGCGGAGAGGGATGCTATTCGAACATCATTCGGATACATTCATCCAGCTACGATTAACGCTGACGGCAGCTTCAACGATATAGATTACAATGACGCCGGGGGTTGTATGGAACATGGGGAACGCCTTAGCAAACTCATTCAAGCGTATTATCTTAATGTAACGGTAGATTACATTGAAAATTATTTTTATCGAAACTCAACTACATGGGAATGGGTTGTGAATTCATGGACGTTCATAGCC…	MRRVHPILSLLSVVLIIKCCAAELSAVGTNFRALAMPENAAAERDAIRTSFGYIHPATINADGSFNDIDYNDAGGCMEHGERLSKLIQAYYLNVTVDYIENYFYRNSTTWEWVVNSWTFIAYNAPDVTDWNWWTAQIGTPRSFWQGLFLSRGKISDILYDDMIKRYWTDAQVWNISTIDGKMSASNMANRGFLGLFETFYQGEDRFSDRQNALFKRLENEIEEKKSYQGEGVGADYCIHVHNIHEGVWEVPYYSSHLRLMIYNGGYGAEYLKRFAYIYILLQNTDYEIEEDVLSEFINCFLECHQYLVRGQTFEPSSVGRNIDDNQRVTYWAAYDSVYKVAELLLQLDFRRQELENVITRYLNHGPTSAENALIGNRALFASDMIVHHRQSYMASVRMF…	1.04361	0	96.6942	140.782	124.585	142.877	123.816	172.998	41.4282	54.7532	110.823	11.4411	256.629
OFUSG00223.1	1181.34	6.6504	0.827582	7.22952	4.847e-13	9.78363e-12	GH16740P-RELATED	GSTT1_CHICK^GSTT1_CHICK^Q:232-849,H:3-222^30.942%ID^E:1.04e-25^RecName: Full=Glutathione S-transferase theta-1;^Eukaryota; Metazoa; Chordata; Craniata; Vertebrata; Euteleostomi; Archelosauria; Archosauria; Dinosauria; Saurischia; Theropoda; Coelurosauria; Aves; Neognathae; Galloanserae; Galliformes; Phasianidae; Phasianinae; Gallus	GSTT1_CHICK^GSTT1_CHICK^Q:232-849,H:3-222^30.942%ID^E:1.04e-25^RecName: Full=Glutathione S-transferase theta-1;^Eukaryota; Metazoa; Chordata; Craniata; Vertebrata; Euteleostomi; Archelosauria; Archosauria; Dinosauria; Saurischia; Theropoda; Coelurosauria; Aves; Neognathae; Galloanserae; Galliformes; Phasianidae; Phasianinae; Gallus	PF02798.21^GST_N^Glutathione S-transferase, N-terminal domain^15-81^E:9e-06`PF13417.7^GST_N_3^Glutathione S-transferase, N-terminal domain^20-84^E:5.9e-05`PF00043.26^GST_C^Glutathione S-transferase, C-terminal domain^122-204^E:2.1e-08`PF14497.7^GST_C_3^Glutathione S-transferase, C-terminal domain^134-206^E:1.8e-07	.	.	KEGG:gga:396322`KO:K00799	PTHR43917:SF8	GO:0005737^cellular_component^cytoplasm`GO:0004364^molecular_function^glutathione transferase activity`GO:0006749^biological_process^glutathione metabolic process	GO:0005737^cellular_component^cytoplasm`GO:0004364^molecular_function^glutathione transferase activity`GO:0006749^biological_process^glutathione metabolic process	GO:0005515^molecular_function^protein binding	CTTGGATGCCCATGTGTCAGTTGACTGTAAAATACCTAAATCAACTTAAGCCTTTATATACACATTCTTATATATTTACATGTGAATCAAACAATTTTAAAGACCACATCACCAAAGGTTAATACTTAAGCCATACACATCAAGTTGCCAACAGAACACAGCGAAGGAGCACCAACTGAGCACAAGGAGACTGCAGATCCCACAGACGAGAATATATCAGAAATGGCACCTATCAAATTGCACGCTGACTACAGGTCGCAACCATCAAGAGCGGTTGGGGTGATGTTGATGATGAATAAAGACAAAATTGATTACGAATTTGTCTTGCAAGCATTTGAGAGAACTCCTGAGGAGAAAGCAAAATATCAGAAGGAGATCAGCCCATTTGGCACAGTTCCA…	MAPIKLHADYRSQPSRAVGVMLMMNKDKIDYEFVLQAFERTPEEKAKYQKEISPFGTVPALEVEGLPTILESSAALQYLAELDGVPEHWYPKSAKGRMQVNQYISWHGPDMRKNASGYLEAYFMEPFFMKKTCPEEKLQKIKEGFEKMLDQLENYWLKDSEYLAGDEISIADLQCISELVNVEPTDIDMGKERRPKMAAYIQRVKDKLSPVYDTVFKDPMEQFAMGFKMYKESQK	0	3.22952	132.162	330.904	1211.62	1434.3	4295.69	4645.15	9523.37	6922.81	1343.4	1186.61	782.718
OFUSG03404.1	3629.33	6.64632	0.848907	7.76626	8.08384e-15	1.97225e-13	GAMMA GLUTAMYL TRANSPEPTIDASE	TX14A_SCOSD^TX14A_SCOSD^Q:257-1942,H:30-575^41.239%ID^E:9.35e-124^.^.	TX14A_SCOSD^TX14A_SCOSD^Q:257-1942,H:30-575^41.239%ID^E:9.35e-124^.^.	PF01019.22^G_glu_transpept^Gamma-glutamyltranspeptidase^87-611^E:3.5e-166	.	.	.	PTHR11686	.	.	.	CTCGACCAGCATAAGCGTCGGCGACTACCAACGTAAACGTCAACGAGTGGCAACTTAAGCGTCGGTTAGTGGCAACGTTAGTGTCAACATGAGGAAGTGCAGTTCTTGTGAGGTGTTTCTCCTGGCAGTATTTATCTTTCTCGCAATTGGTGTAATTGTCGTTGCAACCTTGCTGTCATTAGGGATATTAGGGGACAAGAATCCATCAGAGGTAACCATTAGTACAACAGATGCAGATAAGGAGAAACCAGGTCCTCAAGACAGTTTAGCATCCACGTCGCCCCTGGGAGAGTACCGTTATGCTGGAGTCGCTGCACCTAACCCAGAATGTTCGGAAATTGCAACGGAAATGTTAGCCAAGTGTGGGTCTGCTGTAGATGCCGCTATAGCTGCATTGCT…	MRKCSSCEVFLLAVFIFLAIGVIVVATLLSLGILGDKNPSEVTISTTDADKEKPGPQDSLASTSPLGEYRYAGVAAPNPECSEIATEMLAKCGSAVDAAIAALLCTAVGSPQNSGIGGGFFMTVYKRETNETTIIDARETAPAAATETMYLNSSLEKPSVWGGLAVGVPGDVAGMWEAHKRFGNLEWKDLFAPAIKMAQDGVKVTPHMYQEAKGYMSDTGSKPLDKFKELRDMLTKSGSDAELLEAGDIQKRPKLANTLQVIADEGASAFYTGSLTDTIVKEIQDFGGIITKDDLKNYVAKVKQPVISTLKNGTKLYGPPPPSSGIVVQFILSLLDGFDLKFESVEEQVESYHKIAEAFKWGYAKRTYFGDTDFENGTLLELMTNMTNPDFIASIRERI…	20.8648	0	1565.77	892.86	11124.7	6599.04	18246.9	15907	11151.8	11270.1	9049.14	8975.87	3111.41
OFUSG23659.1	84.9838	6.6441	0.978383	6.29533	3.06738e-10	4.33559e-09	EF-HAND CALCIUM BINDING DOMAIN 3	CML20_ARATH^CML20_ARATH^Q:330-563,H:12-89^46.154%ID^E:4.11e-15^RecName: Full=Probable calcium-binding protein CML20 {ECO:0000303|Ref.6};^Eukaryota; Viridiplantae; Streptophyta; Embryophyta; Tracheophyta; Spermatophyta; Magnoliopsida; eudicotyledons; Gunneridae; Pentapetalae; rosids; malvids; Brassicales; Brassicaceae; Camelineae; Arabidopsis	CML20_ARATH^CML20_ARATH^Q:330-563,H:12-89^46.154%ID^E:4.11e-15^RecName: Full=Probable calcium-binding protein CML20 {ECO:0000303|Ref.6};^Eukaryota; Viridiplantae; Streptophyta; Embryophyta; Tracheophyta; Spermatophyta; Magnoliopsida; eudicotyledons; Gunneridae; Pentapetalae; rosids; malvids; Brassicales; Brassicaceae; Camelineae; Arabidopsis	PF13499.7^EF-hand_7^EF-hand domain pair^90-151^E:1.1e-10`PF13202.7^EF-hand_5^EF hand^92-113^E:0.0095`PF13833.7^EF-hand_8^EF-hand domain pair^103-152^E:2.8e-06	.	.	KEGG:ath:AT3G50360`KO:K13448	PTHR47500:SF3	GO:0005814^cellular_component^centriole`GO:0005737^cellular_component^cytoplasm`GO:0005829^cellular_component^cytosol`GO:0005886^cellular_component^plasma membrane`GO:0005509^molecular_function^calcium ion binding`GO:1901527^biological_process^abscisic acid-activated signaling pathway involved in stomatal movement`GO:0000278^biological_process^mitotic cell cycle	GO:0005814^cellular_component^centriole`GO:0005737^cellular_component^cytoplasm`GO:0005829^cellular_component^cytosol`GO:0005886^cellular_component^plasma membrane`GO:0005509^molecular_function^calcium ion binding`GO:1901527^biological_process^abscisic acid-activated signaling pathway involved in stomatal movement`GO:0000278^biological_process^mitotic cell cycle	GO:0005509^molecular_function^calcium ion binding	ATTGCATTGGTAGAATATTTCCATGGTAGCATTCTATTCCCAGTAAAAGAAAAGAAAACATGTAGAGAACAACTGAGAATGACACTTCAATAAAATAAAATAAAAAAATGCGGAAAGTGGGGTTCCAGGTATCTCAAGAGTCTGCCTCGGAAGATGGAGAACCGCCAGGCCACGCAAGAAAACGGGATTTCAACGCTGCATACTCAGATTCAAACTCTTCGATCGACGATGGATCAGAAATTAATACAACCGTACATCAGAGTTTACTGGAAAACAAAGATCTCCTTGCCCTCGGTGCAGGTACAACAGAACATAAAGACCCCGATCCTGAATCCCCGCAATGGTACAAGGAGCTGAACGAGGAGCATGTACAAGCATTCAGAGAGGTATTCGAACTTC…	MRKVGFQVSQESASEDGEPPGHARKRDFNAAYSDSNSSIDDGSEINTTVHQSLLENKDLLALGAGTTEHKDPDPESPQWYKELNEEHVQAFREVFELLDADGGGSIDASELYVCLKDLELGITKEEIEVVLLDLDKDGNGEIDFDEFLYAMTETERFLDNLPDDDTGKTDARGYSDRQTLFFSAITKFAIKNSVGSVGRYYSNKARQMPHVLHHYTAGARLIGLTDRQLARHLKQMQSDNKGNKSPYAQPLQFVISSGTPKKRKIRRRPATAAKATATTSTRRPASAHAIKRGPSYDNNTLSAEEYEYMMRQKGSFRGRRTAVTSESPELKKILKTFEHWAEKGSVMAKLPGAHLVPEVKKRIEDGALNEDNPLCSSLRKRKQHQKTQKALSEAESGKV…	0	3.22358	269.993	161.709	602.764	518.629	274.758	240.295	64.5028	71.978	22.5677	28.3124	17.2773
OFUSG15568.2	46.2457	6.64127	1.27683	4.55555	5.2248e-06	3.75685e-05	FAMILY NOT NAMED	PLMN_RAT^PLMN_RAT^Q:2444-2680,H:107-181^53.165%ID^E:3.28e-18^RecName: Full=Plasminogen;^Eukaryota; Metazoa; Chordata; Craniata; Vertebrata; Euteleostomi; Mammalia; Eutheria; Euarchontoglires; Glires; Rodentia; Myomorpha; Muroidea; Muridae; Murinae; Rattus`PLMN_RAT^PLMN_RAT^Q:2447-2812,H:381-525^34.228%ID^E:3.49e-17^RecName: Full=Plasminogen;^Eukaryota; Metazoa; Chordata; Craniata; Vertebrata; Eut…	PLMN_RAT^PLMN_RAT^Q:2444-2680,H:107-181^53.165%ID^E:3.28e-18^RecName: Full=Plasminogen;^Eukaryota; Metazoa; Chordata; Craniata; Vertebrata; Euteleostomi; Mammalia; Eutheria; Euarchontoglires; Glires; Rodentia; Myomorpha; Muroidea; Muridae; Murinae; Rattus`PLMN_RAT^PLMN_RAT^Q:2447-2812,H:381-525^34.228%ID^E:3.49e-17^RecName: Full=Plasminogen;^Eukaryota; Metazoa; Chordata; Craniata; Vertebrata; Eut…	PF01823.20^MACPF^MAC/Perforin domain^7-216^E:9.4e-14`PF00051.19^Kringle^Kringle domain^699-777^E:1.9e-22`PF00754.26^F5_F8_type_C^F5/8 type C domain^795-926^E:2.1e-27	.	.	KEGG:rno:85253`KO:K01315	PTHR46549	GO:0009986^cellular_component^cell surface`GO:0005615^cellular_component^extracellular space`GO:0031232^cellular_component^extrinsic component of external side of plasma membrane`GO:0019897^cellular_component^extrinsic component of plasma membrane`GO:0098978^cellular_component^glutamatergic synapse`GO:0043231^cellular_component^intracellular membrane-bounded organelle`GO:0005886^cellular_componen…	GO:0009986^cellular_component^cell surface`GO:0005615^cellular_component^extracellular space`GO:0031232^cellular_component^extrinsic component of external side of plasma membrane`GO:0019897^cellular_component^extrinsic component of plasma membrane`GO:0098978^cellular_component^glutamatergic synapse`GO:0043231^cellular_component^intracellular membrane-bounded organelle`GO:0005886^cellular_componen…	.	CACCCGGAGACCCCTGCTACGCTTTTAAAAGAATGTCAACTTTGTGCTTGAACATGCTAGATGCCGCTGCATTTATTGGAGTTGGTTTTGATGGACGTGGTGATGTGACGCAGGAATTCCGGAAGAAGTCACTTGTACAAAGACAATGCAAAAATAAGGGCAGGAAGCAATAAACAGAAATTATGGCACCTCAATATCTGGCAGAGGTGGAAGAGGTTTTCTTTCAGCGTCCGTTTCTGGAGGGGCCCAGAGTTCAGGGAGCAGCAGTATAAACTCCGCAAATTCGCAAGATTCAAATGGCGGGTCAAGTGCTAGAGGATCACAAAGAGCAGGGTCTTCGAGAGTGTTTATGTCATACCTAGAAATGAATATTGTTAGGTTTGAGATTTTCATGGATGA…	MSYLEMNIVRFEIFMDEVTPGDLSQALLKDYLNLPTSYFKTSSAVMKYQNFLLRWGTHFIKSAKFGGSLKLSRTKVMSEKETEEQFATAAYSDMQSLLSNSFAAQSSSSQGSASLGLFTGARLQASRNTKEQENKKQSATKETSSSSKNSANEQRTAQNYANSYLSVEGGDEEIASIISDMYDPGFKSKLEAWLQSIPEYPRPFAFHLGKITELFDMNVESLFPDDTNQGCLGAAVKNDPATGKFYFESKKTVGKEIKIVKNYCKYGTSKKEFQEQFDMRRLALERAIAVYMEEGPIPSTEQLIPAGRPGCDTSFTAFDKSSFPTWENLKSGPFRVIFDMDRDITGIVASDDIVQVSLKHKRWYTQRDETVLHLYDGFDNGQSTSDLTLKRISIKGLLM…	1.04384	0	173.113	55.2624	73.1789	44.4494	9.52276	14.8996	22.8327	18.2563	630.423	179.577	13.5906
OFUSG00412.1	121.635	6.63915	1.06626	5.54584	2.92549e-08	3.0962e-07	.	.	.	.	.	.	.	.	.	.	.	GTCTGTCAAGGTACAAGCCTATAGATCGGTTACTCTGAAAGCTACTGCTATATTTACTGGATTAAAGTACAAAATATTGTGTTTAACTTGAGGTATTTTCTACAACGGTTAAGCAGTTCATAAATTTGGTTTCTAAGCACGTTACGAGAGAGTTGACTCAGAGACAATAAGTCAACCTTGGCAAATAAACATTTGAGCGATATCGCCAAAGTAAATCTCGATCGATTCAGACACTGGCTTAAACTTGGGAGTCTGTCAATCACAAAAGGACAGAGTCGAGGATAAATACTTCAAAAAGATAAATGTTTTATTAACCCAAAGTCCAAAGAATGACGAATGGCCACGAATGGCATAAGCAAACTTACATTTTATACAAAAGCACAGCAATGTTTGCGTTGT…	MTAAVGVLEKDLPVDSSRLGGFKLTIRRPNGTYKSNVMEAIRRRETSSSSWAWDCKTLPQRPSTVMSTVSPPESNKIKRVNSVSWDTRLYQSNDLRGMQYNNNSMKTNSSHLLRPLGECRSASMDSRRWRKVSNPAPSFDVKEDNIETSYADILKYANRQSMDTSSPRQQNRNKLEKQNTFISVSKFPIVSKFQTQEKTAKSPVHESLASKNIMQRRMAIAKHNNVTTSPNQRKSRNTITITNDITNYHNTDDINGHQGDLAEPDFESARQQFSHSRDPNTRLKINGLSLSDYSAVNVGGEAGVPTLPATPCLRNGSIKVTPSAANMAWSVGSWSQTRTKTRTNSKPTKVRFNISNDVKEYVPSEPVCATDDKK	1.04329	1.07365	96.8686	233.638	133.66	143.94	265.151	187.792	426.326	278.46	768.894	407.66	335.553
OFUSG05489.1	479.281	6.63815	0.445105	14.8472	7.25581e-50	2.5447e-47	HOMEOBOX PROTEIN HMX	HMX3_DANRE^HMX3_DANRE^Q:1083-1463,H:159-278^62.205%ID^E:4.14e-30^RecName: Full=Homeobox protein HMX3;^Eukaryota; Metazoa; Chordata; Craniata; Vertebrata; Euteleostomi; Actinopterygii; Neopterygii; Teleostei; Ostariophysi; Cypriniformes; Cyprinidae; Danio	HMX3_DANRE^HMX3_DANRE^Q:1083-1463,H:159-278^62.205%ID^E:4.14e-30^RecName: Full=Homeobox protein HMX3;^Eukaryota; Metazoa; Chordata; Craniata; Vertebrata; Euteleostomi; Actinopterygii; Neopterygii; Teleostei; Ostariophysi; Cypriniformes; Cyprinidae; Danio	PF00046.30^Homeodomain^Homeodomain^208-264^E:6.8e-21	.	.	.	PTHR46110	GO:0005634^cellular_component^nucleus`GO:0043565^molecular_function^sequence-specific DNA binding`GO:0030154^biological_process^cell differentiation`GO:0042472^biological_process^inner ear morphogenesis`GO:0007399^biological_process^nervous system development`GO:0048916^biological_process^posterior lateral line development`GO:0006355^biological_process^regulation of transcription, DNA-templated	GO:0005634^cellular_component^nucleus`GO:0043565^molecular_function^sequence-specific DNA binding`GO:0030154^biological_process^cell differentiation`GO:0042472^biological_process^inner ear morphogenesis`GO:0007399^biological_process^nervous system development`GO:0048916^biological_process^posterior lateral line development`GO:0006355^biological_process^regulation of transcription, DNA-templated	GO:0003677^molecular_function^DNA binding	ACAATCACGATGTGAAGCAAATTGCCGGTTTATTGCATCAAGGCTTGAAATTCACGGCGAAATTTGGTCAAGATTATTATCAGAGGTATGGGTTCGGCGCCTATATCACCTCTGAGTATTTTTTGATCGTTTTCCACAAATAATTTCCTTTGACAGTTAGCATTATCGCATTGAGAGTCGCGACAAGCTGGGTTACGTGCACTACCCTTTCAACAGGATTACACGTTCGCATACATGCATCATACTTTAAAACATTATTATTTTGACAGCATTCAACAGCTTAGAAAGGCAACTTGGTAAACGTGAATGACGGGTAGCAATTTGCCAAAACCACGCATCATAAATTAGCAGACAGTGAAGAGGTGGGAGACAGTAACCAATTTGAAACAATTGCAACGA…	MRMEENQKREHIHSSFSINSILSKPNKKKPDDDKTPERRRSTSPKYPNETQHAPKASDSDSTIENDAKSAPSTEETNPIVFNSQYGPPVTHPGFTHLMDPRTVLARNPWYPFFAVPPYPVPLPAHQHVPTSVQSLPASPLRIPTIPSSISPNNKSELMVKERLSPGNSRLSPALSDDASIDDADDKDSDIEMNDHTDNPDRSKMARKKKTRTVFSRSQVFRLESTFDMKRYLSSSERAALAASLHLTETQVKIWFQNRRNKWKKLLAQELETHSSAHNTGLSLSTLQQRLVKVPVLYHEGGSQMTTSSEGVLTQSPLMTTFPSMYGLSSVYPNLRPTLPNISH	19.8268	28.976	2481.18	2611.39	1226.23	1887.05	692.144	829.342	797.479	701.144	476.246	588.137	247.097
OFUSG18560.1	308.906	6.63503	0.50863	12.9808	1.5724e-38	2.79221e-36	OVIDUCT-SPECIFIC GLYCOPROTEIN	CHIA_BOVIN^CHIA_BOVIN^Q:129-1229,H:25-387^43.011%ID^E:3.08e-93^RecName: Full=Acidic mammalian chitinase;^Eukaryota; Metazoa; Chordata; Craniata; Vertebrata; Euteleostomi; Mammalia; Eutheria; Laurasiatheria; Artiodactyla; Ruminantia; Pecora; Bovidae; Bovinae; Bos	CHIA_BOVIN^CHIA_BOVIN^Q:129-1229,H:25-387^43.011%ID^E:3.08e-93^RecName: Full=Acidic mammalian chitinase;^Eukaryota; Metazoa; Chordata; Craniata; Vertebrata; Euteleostomi; Mammalia; Eutheria; Laurasiatheria; Artiodactyla; Ruminantia; Pecora; Bovidae; Bovinae; Bos	PF00704.29^Glyco_hydro_18^Glycosyl hydrolases family 18^37-382^E:3.3e-80`PF01607.25^CBM_14^Chitin binding Peritrophin-A domain^573-620^E:6.2e-08`PF01607.25^CBM_14^Chitin binding Peritrophin-A domain^638-687^E:2.4e-14`PF01607.25^CBM_14^Chitin binding Peritrophin-A domain^798-848^E:1.4e-11`PF01607.25^CBM_14^Chitin binding Peritrophin-A domain^1006-1053^E:2.6e-09`PF01607.25^CBM_14^Chitin binding Per…	sigP:1^29^0.495^YES	.	KEGG:bta:282645`KO:K01183	PTHR11177:SF217	GO:0005737^cellular_component^cytoplasm`GO:0005576^cellular_component^extracellular region`GO:0005615^cellular_component^extracellular space`GO:0008061^molecular_function^chitin binding`GO:0004568^molecular_function^chitinase activity`GO:0006915^biological_process^apoptotic process`GO:0006032^biological_process^chitin catabolic process`GO:0002376^biological_process^immune system process`GO:000027…	GO:0005737^cellular_component^cytoplasm`GO:0005576^cellular_component^extracellular region`GO:0005615^cellular_component^extracellular space`GO:0008061^molecular_function^chitin binding`GO:0004568^molecular_function^chitinase activity`GO:0006915^biological_process^apoptotic process`GO:0006032^biological_process^chitin catabolic process`GO:0002376^biological_process^immune system process`GO:000027…	GO:0005975^biological_process^carbohydrate metabolic process`GO:0008061^molecular_function^chitin binding`GO:0006030^biological_process^chitin metabolic process`GO:0005576^cellular_component^extracellular region	TATTTTTGGGAATTGGAAGTATGGAAATAATACGTGTATATTCTGGATTTAATTATTTATTTGTATTGTGGATTTACATCAATTTAAATCAGGAAGGTGCTGCTGGAAAACCAAACGAACAAGTTCGGATGTGCTACTTTACGAACTGGTCACAATACAGACCTGGGGAGGCAAAGTTCCTTCCTGAGAATATAGATCCCCATCTCTGCACTCACATTCTGTACGCATTTGCCAAACTATCAGACAGTGACTATACAATGAAGCCATTTGAATGGAATGACCTTTCAACAGAATGGTCCAAAGGAATGTTGGAAAGAGTAGTAGGCCTAAAGAAGCTAAATCCGAAAGTAAAAGTCCTCGTTTCTCTGGGTGGATGGAATATGGGATCAAAGCAGTTCT…	MEIIRVYSGFNYLFVLWIYINLNQEGAAGKPNEQVRMCYFTNWSQYRPGEAKFLPENIDPHLCTHILYAFAKLSDSDYTMKPFEWNDLSTEWSKGMLERVVGLKKLNPKVKVLVSLGGWNMGSKQFSAMVATRRRRERFIKSVIEFILQTKTDGMDLDWEYPATRGSPLHDKEKYTSLVKELRRAFDDVDREEKLILAAAIPGSKLILESAYDLTEVSRYYDMMIAMCYDLHGSWEWFAGHHSPVFPHSNEKGIQRTLNMHWVVNYLLEFIPREKLVLGVATYGRSMTLRSEDKHNLGHRTVKPGSAGAFTNSPGVLAYYEICKLFANDGWNNVWSDDHAVPYAYKGTQWVGYDDIDSITIKGILARTYNLGGVAVWSLDLDDFQGDCHGTKYPLINQL…	25.0648	17.1425	2397.5	2129.54	746.158	888.936	445.817	521.949	159.442	233.641	235.429	298.866	91.2561
OFUSG19033.1	145.074	6.63424	0.911846	6.85304	7.22959e-12	1.27653e-10	B-CELL LYMPHOMA/LEUKEMIA 10	BCL10_HUMAN^BCL10_HUMAN^Q:248-691,H:13-204^25.389%ID^E:1.82e-07^RecName: Full=B-cell lymphoma/leukemia 10;^Eukaryota; Metazoa; Chordata; Craniata; Vertebrata; Euteleostomi; Mammalia; Eutheria; Euarchontoglires; Primates; Haplorrhini; Catarrhini; Hominidae; Homo	BCL10_HUMAN^BCL10_HUMAN^Q:248-691,H:13-204^25.389%ID^E:1.82e-07^RecName: Full=B-cell lymphoma/leukemia 10;^Eukaryota; Metazoa; Chordata; Craniata; Vertebrata; Euteleostomi; Mammalia; Eutheria; Euarchontoglires; Primates; Haplorrhini; Catarrhini; Hominidae; Homo	PF16739.6^CARD_2^Caspase recruitment domain^22-99^E:6e-07`PF00619.22^CARD^Caspase recruitment domain^26-105^E:1e-14	.	.	KEGG:hsa:8915`KO:K07368	PTHR34920	GO:0032449^cellular_component^CBM complex`GO:0005737^cellular_component^cytoplasm`GO:0005881^cellular_component^cytoplasmic microtubule`GO:0005829^cellular_component^cytosol`GO:0001772^cellular_component^immunological synapse`GO:0005764^cellular_component^lysosome`GO:0045121^cellular_component^membrane raft`GO:0005634^cellular_component^nucleus`GO:0048471^cellular_component^perinuclear region of …	GO:0032449^cellular_component^CBM complex`GO:0005737^cellular_component^cytoplasm`GO:0005881^cellular_component^cytoplasmic microtubule`GO:0005829^cellular_component^cytosol`GO:0001772^cellular_component^immunological synapse`GO:0005764^cellular_component^lysosome`GO:0045121^cellular_component^membrane raft`GO:0005634^cellular_component^nucleus`GO:0048471^cellular_component^perinuclear region of …	GO:0042981^biological_process^regulation of apoptotic process	TGTGTAAGTTAATGTTTGCAAAGTAGCACTATATCTAGTAGCGTTAATAATTGCAGTTAAAGTAGTAtaaataaactaaccctaagtaacactaagctaagctaacactaacactaaGTTATGATTATTATACGGTACAAGATAAAGAGGGTGTGAATCCCATGTAGATATACTGGTACAATTAGACATTATGGGTTCACTCGGCATGGAGTCTACGAAGACGATATCTGAAATAAGTGAAGAGATATTACACGAATTTAAAAAACAGGTCCTCCAAGAGCACCGGCAGAAATTGTGTGAAGTTATATACCCAAGAGACCATTATCCCTGCCTTCGAGGAAGTTTTGTTCTTACCAACGATGACGAGGAACGAATACAATCCAATTGTACAATAAAGGC…	MGSLGMESTKTISEISEEILHEFKKQVLQEHRQKLCEVIYPRDHYPCLRGSFVLTNDDEERIQSNCTIKAQASAMLDIIVTKGPGAFDAFCKSLQENRTQIFLLKLLNQSLEEKINHFKGIYLVKPTISTQNHSKSEENNLPVVSKAHHIDGDSLPVPGEDGGPEIPD	2.079	2.1629	391.103	201.738	291.776	303.855	289.703	284.463	152.831	339.279	474.688	598.328	537.331
OFUSG04531.1	332.182	6.63262	0.742401	8.25786	1.48309e-16	4.48395e-15	MEIOTICALLY UP-REGULATED GENE 157 PROTEIN	MU157_SCHPO^MU157_SCHPO^Q:1610-2872,H:59-497^37.723%ID^E:8.81e-71^RecName: Full=Meiotically up-regulated gene 157 protein;^Eukaryota; Fungi; Dikarya; Ascomycota; Taphrinomycotina; Schizosaccharomycetes; Schizosaccharomycetales; Schizosaccharomycetaceae; Schizosaccharomyces`MU157_SCHPO^MU157_SCHPO^Q:3320-4429,H:110-494^31.218%ID^E:1.39e-42^RecName: Full=Meiotically up-regulated gene 157 protein;^E…	MU157_SCHPO^MU157_SCHPO^Q:1610-2872,H:59-497^37.723%ID^E:8.81e-71^RecName: Full=Meiotically up-regulated gene 157 protein;^Eukaryota; Fungi; Dikarya; Ascomycota; Taphrinomycotina; Schizosaccharomycetes; Schizosaccharomycetales; Schizosaccharomycetaceae; Schizosaccharomyces`MU157_SCHPO^MU157_SCHPO^Q:3320-4429,H:110-494^31.218%ID^E:1.39e-42^RecName: Full=Meiotically up-regulated gene 157 protein;^E…	PF06824.12^Glyco_hydro_125^Metal-independent alpha-mannosidase (GH125)^385-781^E:3.1e-121`PF06824.12^Glyco_hydro_125^Metal-independent alpha-mannosidase (GH125)^907-1303^E:2.6e-78	.	.	KEGG:spo:SPAC12B10.16c`KO:K09704	PTHR31047:SF0	GO:0005783^cellular_component^endoplasmic reticulum`GO:0005789^cellular_component^endoplasmic reticulum membrane`GO:0016021^cellular_component^integral component of membrane`GO:0004559^molecular_function^alpha-mannosidase activity`GO:0019309^biological_process^mannose catabolic process`GO:0051321^biological_process^meiotic cell cycle	GO:0005783^cellular_component^endoplasmic reticulum`GO:0005789^cellular_component^endoplasmic reticulum membrane`GO:0016021^cellular_component^integral component of membrane`GO:0004559^molecular_function^alpha-mannosidase activity`GO:0019309^biological_process^mannose catabolic process`GO:0051321^biological_process^meiotic cell cycle	.	AATTAGTTAGTTCATTTTCAGCTAGACATTGGAAGTGGATGAAACCGTAACTCTGAATTCACCTGCACTTAATAAATATATGTGCATAATTACCATAGGCGTTCATAGTAAATGCAATCGTGCTCAGCGGATGGCAAAAAGTAAATGGCACACGGCCAGCTCAAGATATATACTATTCTCGCAACTGGACTGTAAATATCAAAAATAAACTGTATCGGCGGGACAATTACTGGCAAGTTATTTAATGTAACATATTTTTGTGGACACTTTTACCAATAAACCGAGCGCATAGCTGTGCGAAGTTAGTTAAAACAATACGATGGTTAAGATAGGATATGCTATGGAAAGTTTATGAGCAACATTATATAAAGATGCTGGTAACAAAAATTAACGTACAAG…	MIRRKRLKSLVCIVVTAWVYLGLWSLAAIEWLQDDRSILQNNNIFQDNYDVSIRETDDSPDILDSFYMQNSLNEKFITRILTSTTTVKPNTSAKKINDKVKHQRADAILAWRSHLNKVASADFKSTQIPAQNKNTVHYSIKDRIFNLLRIAAIKNPPVGLWDNIYTLINDLHTHQLFDFYLQLDTYTNSHILQNDTLSYLFDMLTTVKKQSENSDTILIVNDILKQLQKLNITIKTPVYKSNDTQDKSSPFRHGATNHTSISTKQVHKIRPKVAHATRATPKLGWAPTRKAKIALQKVSMDWSDEPLVIPEPGYYFYQGINDPVKIPDSVPEEHRWRYRSDILFWNKNDTLYQKWQKWKSKIVFPPESMKREVERVCNELNPMRKKLCDMFKKCYPNTI…	1.0443	3.21464	274.845	243.922	1511.6	1182.08	1055.1	1413.12	833.064	644.141	515.689	438.76	831.555
OFUSG02905.1	141.416	6.62824	1.08646	5.91139	3.39229e-09	4.16349e-08	HOMEOBOX PROTEIN ARISTALESS	PHX2B_MOUSE^PHX2B_MOUSE^Q:204-725,H:4-158^51.724%ID^E:1.31e-36^RecName: Full=Paired mesoderm homeobox protein 2B;^Eukaryota; Metazoa; Chordata; Craniata; Vertebrata; Euteleostomi; Mammalia; Eutheria; Euarchontoglires; Glires; Rodentia; Myomorpha; Muroidea; Muridae; Murinae; Mus; Mus	PHX2B_MOUSE^PHX2B_MOUSE^Q:204-725,H:4-158^51.724%ID^E:1.31e-36^RecName: Full=Paired mesoderm homeobox protein 2B;^Eukaryota; Metazoa; Chordata; Craniata; Vertebrata; Euteleostomi; Mammalia; Eutheria; Euarchontoglires; Glires; Rodentia; Myomorpha; Muroidea; Muridae; Murinae; Mus; Mus	PF00046.30^Homeodomain^Homeodomain^116-172^E:2.3e-23	.	.	KEGG:mmu:18935`KO:K09330	PTHR24329	GO:0000790^cellular_component^nuclear chromatin`GO:0005654^cellular_component^nucleoplasm`GO:0005634^cellular_component^nucleus`GO:0001228^molecular_function^DNA-binding transcription activator activity, RNA polymerase II-specific`GO:0000981^molecular_function^DNA-binding transcription factor activity, RNA polymerase II-specific`GO:0000978^molecular_function^RNA polymerase II cis-regulatory regio…	GO:0000790^cellular_component^nuclear chromatin`GO:0005654^cellular_component^nucleoplasm`GO:0005634^cellular_component^nucleus`GO:0001228^molecular_function^DNA-binding transcription activator activity, RNA polymerase II-specific`GO:0000981^molecular_function^DNA-binding transcription factor activity, RNA polymerase II-specific`GO:0000978^molecular_function^RNA polymerase II cis-regulatory regio…	GO:0003677^molecular_function^DNA binding	AGAAGGTAAACTAAAACTGCTCTGTGTGAATTAACAATTAACTAATTATTCCGTAGAGTATCTTGTCATCAAGACGATAGTCCGGCATTCTATTAATTCTCTTACGAACTGTGCTCACAGTTGACATCGGAATTCCAAGGTATATTAAGAAATACTCAGGTTTTTCTTACCAGAACGGAAAACGAAAGAGACGAGTAAATATGATGGACTATTCTTACCTGAATCAAGGCGGGTTCGATCCCACGAACTGTGGTATCCCCGGAATGGACGGGATGGCCCCGAACTGTAGCCTCCCGTGTACGTACAGCGACATGGGCCCAGCCTGCGGAGTAGGAGTCGGTGGGCAGATGGCGCAGACTTACCGCTACAACAGCGCCGTACGTAGCTTCGCCGGTGGGC…	MMDYSYLNQGGFDPTNCGIPGMDGMAPNCSLPCTYSDMGPACGVGVGGQMAQTYRYNSAVRSFAGGPGLSSAAASCSMMPRPREHPQPSCFSSGLPYKMYQHAHDSNVSPEKRKQRRIRTTFTSAQLKELERAFAETHYPDIYTREEIAMKIDLTEARVQVWFQNRRAKFRKVERAKNQPSGAQTSGSSQQNQTTSSSKSTDTNSPNSTKEKPKPTTETVKPIPDTSQPKWGTQNCGGQNKGGTLPNPPLPGPYSSILTPASTDYGQPDNNNEHKAIPTSMF	0	5.38381	565.958	234.886	413.666	384.248	410.056	381.495	283.774	280.819	285.454	289.642	275.29
OFUSG13757.1	394.063	6.61914	0.800829	7.43749	1.02613e-13	2.22661e-12	.	.	.	.	.	.	.	.	.	.	.	GCAGTGTAACTAATGGACGAAAACTCAATTTCTTACCTGGAGTATGTTTCCAATGCCATCGTGTCATGACAACATATTGGACCTAATTTTGAAGTAACGTACACGGTATATGCAGATAAATGTTAAAAAACAGCACTATTCAAGCGAGGGGTGCTGCTTACGGAAGGACTTAACCAAGAAAAATATTAGAGATTTATTCTGTACGACTTGTTAGGCCTAGTTAGACATATCATAGAAGATGAGTAGTATGCCAAGACCATACAGTTCTGCCAGTCACCCGCGGCAAGATACACGGGGCCCTTGGCGTGGTTTTGCAGGAGGCGACTTCACCCACCCCACAGAACATAAACCAATGGTGATCGACATCATAGGTTGCCACAGGGAAGTCACCGTCTGCGG…	MSSMPRPYSSASHPRQDTRGPWRGFAGGDFTHPTEHKPMVIDIIGCHREVTVCGHIELLRRLPIRHRNHLQLMETYSREPGNYEGRHSEYYDSHAKLLDYGHGYIALRLYDDITRPELGEFLLGKGWKMIGFAANKDGNKTIITEKWCNIRDH	2.08057	1.07985	259.573	149.409	1525.55	871.283	1150.26	813.489	558.386	446.753	891.137	860.425	3103.2
OFUSG06470.1	1013.58	6.60596	0.717039	8.672	4.24588e-18	1.50034e-16	.	.	.	.	.	.	.	.	.	.	.	CTCAATGGTATCTAAGCCGTGAGTAAATAGGGTTACAATAGAGCTTATTGACAATAGAACCATATGTTGAAGTTATAATAGAAATCGTTATACATTTGTTTACTTTAATCTCTAATCTATATTTATGTGTATGAGACTAGTAGAACATGATCTGATTTTACTTACCAAGAGCCAAACGTATACGGAGTTCAATATTACTTGGAATATAAAAACTTAGACAGATATGGCAGACATCGAAGACAAACCCCAGAAGCCAAAAGAGGCCGCGGTTCTCACAGAAGGAAGCCTGGGATATCTTGCTAAAGAGATTCCCGACCCCATCATTCTAGGAATGTACCTGAATATTCCCAACACACGTTTAGTTGACTACACAATAGACCCTTCCAGCCAAGCTAACGT…	MADIEDKPQKPKEAAVLTEGSLGYLAKEIPDPIILGMYLNIPNTRLVDYTIDPSSQANVADMSRKVLMFWKQMRETAKEKDKVADLDRALRSSGKHDLAETLLNKHQDGMELTPDCFAL	2.07039	3.27114	432.968	212.641	2680.62	1854.93	5032.03	4057.66	4134.2	3368.86	1976.67	2845.48	755.483
OFUSG26928.1	222.113	6.59477	0.929629	6.48283	9.00174e-11	1.36152e-09	.	.	.	.	.	.	.	.	.	.	.	TAAGAACAAGTCAGAAGTTTAGTGAAGACTATAGAATATGGATTTAGACTATTGAGGTGAACTATCATCGATACATTGATGTAGATACGTCAAACACATTGTATATATGAATGGACGATTTACTGACAAATGCAGCATGTTAACAACAAATAGTTAGACTTGTTGATGGATATCTATCCCATCGTATACCTGTAATGGATACCGTCAGTACTACGCCGTACGAAAAGGCGACAGGAACTACAACGAAGAAGACACGAAAAGACCCTGCTCAGAACAAACCTGATACGGAACCAAAAAGAAGTGACTCTGAATTGTCGTATAGAGAGAAACACAAAAAGAAAAGAAGCGGTTTTAATTTTATTTACACTGGCACGGACAAGCGATCCTTCGAAAAACAAC…	MDTVSTTPYEKATGTTTKKTRKDPAQNKPDTEPKRSDSELSYREKHKKKRSGFNFIYTGTDKRSFEKQRESVDRLSQCKKAPPDSNRVLTSDINDIKGLTASFQWTANGHLGQGFIH	0	3.25088	111.721	316.913	502.058	565.426	293.098	620.284	634.59	480.017	956.144	1438.18	72.1998
OFUSG21053.1	630.389	6.57659	0.935909	6.76875	1.29898e-11	2.21687e-10	.	.	.	.	.	.	.	.	.	.	.	GTAGTATTGGATTGACAGAGCTCTTGAGAGCAGTGAAAGTGTGAAGAGTAGATCAGTCTCTTGTCTAAGGATCGGGCTACCCGATACTAAGTTAGGAATTTCAAGTTAAAATTAGAAAGGAAAACACTTGCGAGAGCTCAGACGCTTTTAACTGTCTTATACATACAATGGAATACACACAATGGAGAAAGTGGAAATATTAAGTTGAACGTCTGTAACCTGTTTGATGTGTGAGTGGACGCAAATGAAAGTGTTAAAATGGTCCGTAAAAAACTAACTCGGTTCAAGAGCCAGGCTTAATGCCGTGGATTTGTGAAACAATAGGAGTGTATGTAACGGTCAGAGTTTTTGATTTGCACTTGAAAAACAATGCCTCTCGACCTTCAAACAAATATTAAA…	MVRNNMSELPPIGNPSLASQSPRGYGKSSSNGSVTPRSARDPSPISYLGTPRVLTPRSQQKIMLAVPGLPTKLPIKIKTSERSEQISLDMKCIRDDTGKRTSPLASPKSMQSNNSVASSNSSTNGTPRLSNRVRNADKATPGRVLHKSNSWCAESRPSPNQKLETLFETKRNVTCQETTFTHEDPNEPPVISPGRVRHFSLTSIGKDGEGVKRAVTSKNKARPSDINKNKIRRNYSDQNLGDRKMSHSTDSVSPKAINEEKQINAEYTANVMDKKPPIPKRPSTSNGLNKKQLEKFHRETTKVSRQLSNDSQSDYIGSDDGEYDDRIITWLMGVDRGVETPPEIPIDYEEKQQTDTAIHVVYEEKT	3.1314	2.14519	484.127	230.44	492.78	474.129	1288.78	1335.14	2636.26	2604.75	3723.46	3264.09	422.989
OFUSG10541.1	444.212	6.57256	0.679705	9.64267	5.27972e-22	2.66454e-20	TRANSIENT RECEPTOR POTENTIAL ION CHANNEL PROTEIN	ANKK1_HUMAN^ANKK1_HUMAN^Q:680-943,H:413-497^32.955%ID^E:8.66e-07^RecName: Full=Ankyrin repeat and protein kinase domain-containing protein 1;^Eukaryota; Metazoa; Chordata; Craniata; Vertebrata; Euteleostomi; Mammalia; Eutheria; Euarchontoglires; Primates; Haplorrhini; Catarrhini; Hominidae; Homo	ANKK1_HUMAN^ANKK1_HUMAN^Q:680-943,H:413-497^32.955%ID^E:8.66e-07^RecName: Full=Ankyrin repeat and protein kinase domain-containing protein 1;^Eukaryota; Metazoa; Chordata; Craniata; Vertebrata; Euteleostomi; Mammalia; Eutheria; Euarchontoglires; Primates; Haplorrhini; Catarrhini; Hominidae; Homo	PF12796.8^Ank_2^Ankyrin repeats (3 copies)^153-224^E:8.7e-09`PF13857.7^Ank_5^Ankyrin repeats (many copies)^159-211^E:1.1e-08`PF00023.31^Ank^Ankyrin repeat^170-202^E:0.018`PF00520.32^Ion_trans^Ion transport protein^346-575^E:9.5e-17	.	.	KEGG:hsa:255239`KO:K16289	PTHR10582	GO:0042995^cellular_component^cell projection`GO:0005737^cellular_component^cytoplasm`GO:0005634^cellular_component^nucleus`GO:0005524^molecular_function^ATP binding`GO:0004674^molecular_function^protein serine/threonine kinase activity`GO:0010564^biological_process^regulation of cell cycle process	GO:0042995^cellular_component^cell projection`GO:0005737^cellular_component^cytoplasm`GO:0005634^cellular_component^nucleus`GO:0005524^molecular_function^ATP binding`GO:0004674^molecular_function^protein serine/threonine kinase activity`GO:0010564^biological_process^regulation of cell cycle process	GO:0005515^molecular_function^protein binding`GO:0005216^molecular_function^ion channel activity`GO:0006811^biological_process^ion transport`GO:0055085^biological_process^transmembrane transport`GO:0016020^cellular_component^membrane	GTGCATGCTATTTGGCTGGAGTTGACAGCTAGACCGTGACAAGTGACAATGTTATATTTACATGTACATGTAGTTAAAGATAGATGTGATTTTCAATACATGCAGAAGGTGATTTTTCTACCCTATATAGTGAGAATGAAGAATCTCTGTACATAAAATGCAAATCATGAAGTTTAAGGCTCATTGACAAGACAGATCTGTTTCTGTTGACATTATGGATAAGAAACTACAGAATATAATTACCAGATCCAAATATGTGGAAAATGGACCAAATAGCAGTGAAACATTGGACGAACAAAACAATGGCAATGAGACGACAGAGAAACGTCGATCGCGTGGTGATTTCCGCAGACGTACAGATTCCGATCTTCATGAAATGTACCCGAATCAGTTCTATGC…	MDKKLQNIITRSKYVENGPNSSETLDEQNNGNETTEKRRSRGDFRRRTDSDLHEMYPNQFYALNAATITDVHDIPVNLVANDFGTLANDILQDLKKDSTLHAIAAKTQKHFIGKQEAEIEVVIDMIVAKRGGLDEALLYVVSEMIVQPKVEAFVNVLLHRNANTSATDRNGKTVLHYAAQKKFEGVCQKLLDRNALPHMRDNEGKTPYHIAIENKYDEIGALMLAYMPNNIARDLHTAQGNTPAEFVLANLVDLGMKATVQALLNCLIDRFGPVDRHKIYFKMLDADSQGFPPNHSKFNTRGKSGLHKLAYVGDKDYIYHDAVRLLIRRKWKHFAKFRFTCSAIMFLVSLFILTFAVAVACQAPDPMVYDTPLQIARAVCEVWSVVFVLFHLFLEIRQL…	2.08705	35.4145	1762.57	1815.66	1823.95	2377.06	1190.61	1160.41	460.173	599.342	258.502	186.3	60.432
OFUSG13411.1	1503.27	6.56461	0.61626	10.5918	3.25299e-26	2.32829e-24	BETA TRANSDUCIN-RELATED PROTEIN	NWD2_HUMAN^NWD2_HUMAN^Q:397-3291,H:35-1027^27.689%ID^E:1.13e-105^RecName: Full=NACHT and WD repeat domain-containing protein 2;^Eukaryota; Metazoa; Chordata; Craniata; Vertebrata; Euteleostomi; Mammalia; Eutheria; Euarchontoglires; Primates; Haplorrhini; Catarrhini; Hominidae; Homo	NWD2_HUMAN^NWD2_HUMAN^Q:397-3291,H:35-1027^27.689%ID^E:1.13e-105^RecName: Full=NACHT and WD repeat domain-containing protein 2;^Eukaryota; Metazoa; Chordata; Craniata; Vertebrata; Euteleostomi; Mammalia; Eutheria; Euarchontoglires; Primates; Haplorrhini; Catarrhini; Hominidae; Homo	PF13271.7^DUF4062^Domain of unknown function (DUF4062)^37-129^E:5.2e-06`PF13191.7^AAA_16^AAA ATPase domain^386-511^E:4.8e-08`PF00931.23^NB-ARC^NB-ARC domain^390-621^E:8.3e-06	.	.	KEGG:hsa:57495	PTHR19871	.	.	GO:0043531^molecular_function^ADP binding	AAAATTATCGCTAAGTATATAGAAATGGTTAATAAATAACAAACGCTCCCACTTAATCAAGAGCAAAGTGTACGAACAAATAGACTTAGTTTACTGTCGCTATGGGTAACCAGGGACCTTACACTATGAATGGTAAAAGCAATAAGCAGCCATTGGAAATACAACTTACATGTTATTGGCGATAAAACCATATGCATATTTAACTGAATGGTTAAAACAAGGTTTACACATGTTTGTTAAATCTGCTACTGGATTTACTGGAAGAATGAATTATCTAATAGTCTAATCAACAGATGTTAAACTAAAATGGAACTTTTAAAAAGTTTAGTTCTTGAGGAAAATGATCTCGTCCATGATATACTTGGAGGGAAATGTCGCCTGCAGGATGTACCTGATATC…	MELLKSLVLEENDLVHDILGGKCRLQDVPDIPAKVVRVYMSATWTDTVQERNALVERVYPKLREYCREKYGHDFQVVDLRWGVQESWWNDHSALQLHIKEIQRCKQLSSGPNFMVLFGQRYGRRPLPARIVGAEYDIIRDCLLHHKNRDTREQGQLDIWYKKDTNANPHVYILQPINSVITDFNNNDNEEMQKQGKERWEGVQTTLRKLLQLGVEYAITEEKLPAESKHKYCISELESEVIEGIGKASTAQHECQVFVRKIVDLKNYINEPITPKFMEVTYDDKEEKTKIDSEVQDLLTDLIENKLQKWSATETIQTFQVLWRFEGGINPTLHKSYLDQFSNTAHECLQRLIDDVVTKQTDISSPFPVFDEVRQHMLHYKNCCQSFFGREDILDKIHSY…	33.4238	4.28455	2494.3	1318.48	3817.43	3031.86	4568.81	3948.16	4737.79	4286.98	5117.58	5506.79	1710.85
OFUSG08664.1	216.332	6.55021	0.888107	7.22383	5.05453e-13	1.01659e-11	.	.	.	.	.	.	.	.	.	.	.	GCTGGAAACACTTAGCTGACTTGATAAGATATCTGTAAGAATGGATAAAGCGTCCCAAAGCTACGGGCAAAGGAAGACTACCCATGTTAATTCCAACCCTCTGGTAGCAGAGCCTAGCAACTGGGAATCCATGACAAAACGCACTCATAACCTGAAGTTCACCCCGGGTCCTTCCCCGACCCTGCCTGATCTACCCCCTTCTAAGAGCCACAACAGAGCACACAATCCACACTCTAAAAATGTCTATCACATTCGACGTTTTAACAATGAGAGAGTATGTGACGTAACAAGTTCCGAGAATGGCGAACAAGACAGGACGTTCAATAGCCAGTCAATCAGTAGAACGACGTATGGGCCTAAACCACTTGGTAGTGAACGGCGCTTCACAAAGTCATTGTA…	MDKASQSYGQRKTTHVNSNPLVAEPSNWESMTKRTHNLKFTPGPSPTLPDLPPSKSHNRAHNPHSKNVYHIRRFNNERVCDVTSSENGEQDRTFNSQSISRTTYGPKPLGSERRFTKSLYTSKDPHPLVNTIVPIDHQIDETRANFAKCERILPADAKVHMLNTKPFVTLKRRVTPPTEEGGVFYHDVPRLNKESVTLLSGGQSFSRRKASKGPAETLCVNGFDGGPQGEAWPTRHSFYKNAFHRSDNRKSQLPDVRDNQYTIN	7.27411	3.24659	828.565	453.746	352.884	314.456	296.144	184.226	481.112	396.374	1066.61	918.687	440.883
OFUSG22680.1	385.596	6.54469	0.766971	7.66667	1.76521e-14	4.13755e-13	GLYCOPROTEIN 3-ALPHA-L-FUCOSYLTRANSFERASE A	FUT3_BOVIN^FUT3_BOVIN^Q:574-1356,H:91-344^38.931%ID^E:3.06e-41^RecName: Full=3-galactosyl-N-acetylglucosaminide 4-alpha-L-fucosyltransferase FUT3 {ECO:0000250|UniProtKB:P21217};^Eukaryota; Metazoa; Chordata; Craniata; Vertebrata; Euteleostomi; Mammalia; Eutheria; Laurasiatheria; Artiodactyla; Ruminantia; Pecora; Bovidae; Bovinae; Bos	FUT3_BOVIN^FUT3_BOVIN^Q:574-1356,H:91-344^38.931%ID^E:3.06e-41^RecName: Full=3-galactosyl-N-acetylglucosaminide 4-alpha-L-fucosyltransferase FUT3 {ECO:0000250|UniProtKB:P21217};^Eukaryota; Metazoa; Chordata; Craniata; Vertebrata; Euteleostomi; Mammalia; Eutheria; Laurasiatheria; Artiodactyla; Ruminantia; Pecora; Bovidae; Bovinae; Bos	PF17039.6^Glyco_tran_10_N^Fucosyltransferase, N-terminal^170-273^E:3.7e-19`PF00852.20^Glyco_transf_10^Glycosyltransferase family 10 (fucosyltransferase) C-term^295-467^E:9.1e-58	.	.	.	PTHR11929:SF145	GO:0032580^cellular_component^Golgi cisterna membrane`GO:0016021^cellular_component^integral component of membrane`GO:0017060^molecular_function^3-galactosyl-N-acetylglucosaminide 4-alpha-L-fucosyltransferase activity`GO:0017083^molecular_function^4-galactosyl-N-acetylglucosaminide 3-alpha-L-fucosyltransferase activity`GO:0046920^molecular_function^alpha-(1->3)-fucosyltransferase activity`GO:0036…	GO:0032580^cellular_component^Golgi cisterna membrane`GO:0016021^cellular_component^integral component of membrane`GO:0017060^molecular_function^3-galactosyl-N-acetylglucosaminide 4-alpha-L-fucosyltransferase activity`GO:0017083^molecular_function^4-galactosyl-N-acetylglucosaminide 3-alpha-L-fucosyltransferase activity`GO:0046920^molecular_function^alpha-(1->3)-fucosyltransferase activity`GO:0036…	GO:0008417^molecular_function^fucosyltransferase activity`GO:0006486^biological_process^protein glycosylation`GO:0016020^cellular_component^membrane	TTCACAGCTGAGTGCGCTTGGCCCATGCCCCATACAGTAGGTTATATAGTCCAGAGTGTTTACTTAATGTTTAACATACTTAATACGGACATAGCATGTAGACAGAAAAACAGAGTAATGAATGATTTATCAAAAGTTGAAATGATAAAACTGATATTAAAAATGATGAAACGCTGTATGTACTACCTATTTTTTATTGCAACAGGATTAATCATCGGCAATTTGATAATAATGACCTTATTTCCAGATAAGGTGCAATATGGGAATTTTCAGAGTGCTTTCTTCAAATATGCGAGGAATTATCCAATGAACAATAAATCGATTGAAAGCCAATGGAAATATCTCGAAAAGAGAGACGGCATCAGCGACGAATCAGTTGTAGATCATGATACTATAGAT…	FTAECAWPMPHTVGYIVQSVYLMFNILNTDIACRQKNRVMNDLSKVEMIKLILKMMKRCMYYLFFIATGLIIGNLIIMTLFPDKVQYGNFQSAFFKYARNYPMNNKSIESQWKYLEKRDGISDESVVDHDTIDVNLNPAAVINDTDELNETDVKRDGKSKKTKKKTDVIKILEWTKCFGHSCFPNEAFKNCGVHQCEAITDRSKLKQAQVVLFHTCKLSDLVEAGDPPKYRSPSQRWIFRCMEAPSLKWFKHQTLKDAFNFTMTTRLDSDFHVYHGIYTRNPDPPKVLPDYAKGKSKLAAWIVSHCRTHSRREVYVKRLQEHVPIDIYGKCGTKKCPNPENQYACLNYVGATYKFYIAFENSDCRDYVTEKVWRNAILKNAVPIVRGVYNNFKAILPPG…	3.12757	0	195.781	163.829	2136.98	2082	1623.52	2323.78	722.154	844.175	142.549	139.233	31.7016
OFUSG26208.1	5110.02	6.53977	0.543471	11.8407	2.40499e-32	2.7883e-30	HEMATOPOIETIC PROSTAGLANDIN D SYNTHASE	GST1_ASCSU^GST1_ASCSU^Q:305-928,H:3-206^39.437%ID^E:6.06e-40^RecName: Full=Glutathione S-transferase 1;^Eukaryota; Metazoa; Ecdysozoa; Nematoda; Chromadorea; Rhabditida; Spirurina; Ascaridomorpha; Ascaridoidea; Ascarididae; Ascaris	GST1_ASCSU^GST1_ASCSU^Q:305-928,H:3-206^39.437%ID^E:6.06e-40^RecName: Full=Glutathione S-transferase 1;^Eukaryota; Metazoa; Ecdysozoa; Nematoda; Chromadorea; Rhabditida; Spirurina; Ascaridomorpha; Ascaridoidea; Ascarididae; Ascaris	PF02798.21^GST_N^Glutathione S-transferase, N-terminal domain^31-98^E:4.6e-06`PF14497.7^GST_C_3^Glutathione S-transferase, C-terminal domain^142-231^E:4.5e-14`PF00043.26^GST_C^Glutathione S-transferase, C-terminal domain^158-211^E:0.00014	.	.	.	PTHR11571:SF224	GO:0005903^cellular_component^brush border`GO:0005737^cellular_component^cytoplasm`GO:0004602^molecular_function^glutathione peroxidase activity`GO:0004364^molecular_function^glutathione transferase activity`GO:0098869^biological_process^cellular oxidant detoxification`GO:0055114^biological_process^oxidation-reduction process	GO:0005903^cellular_component^brush border`GO:0005737^cellular_component^cytoplasm`GO:0004602^molecular_function^glutathione peroxidase activity`GO:0004364^molecular_function^glutathione transferase activity`GO:0098869^biological_process^cellular oxidant detoxification`GO:0055114^biological_process^oxidation-reduction process	GO:0005515^molecular_function^protein binding	CGAACACTGAATGTTTAGTAATGCCTGTTAAAAGCCTCTATGGTTTAAACAAAGAGTCAACACTTGCTAAATAGAATACACTAATATTTGATTATCACAAATAAAACAGAATGACTTGCAGTTTTCAACTAAGCCAAAATGTACATATAAACTGGAAAATCACATAGAAACATCGATCGAGGTTATATCACTATTCCGGTAGTATACGGTATAACCCTAGATGTATACTGCTTACCGAGTAGAACTGAAGCCATCGGGATCTAGTGAGACATACCGGGGAAACGACCAGAACAACATGTCTAAGTCATACAAGCTAACGTACTTCGACGCAAGAGGAAGAGGGGAGTTTATTCGGTTGATATTCAATTCGAAAAATATCAAATTTGAGGATAATAGAGT…	MYTAYRVELKPSGSSETYRGNDQNNMSKSYKLTYFDARGRGEFIRLIFNSKNIKFEDNRVKQPDWPALKPKTPMGHLPVLQVGNVTLSESITVARFAANEAGIAGKTILEKAQADMIVESLTELITAVFNAALSAGRPDKVPAALAAVIAKEGKTSLGNVEKCFVANNPGGSFLVGKEMTWADICIFNVMNCLSGFGQDAEKILNENSPKLLSIYKCVAENPNIANWVKTRPETPF	11.447	6.47477	877.911	911.95	4977.38	5653.12	22759.7	11625.8	56022.1	22947.4	4680.83	4375.26	2963.34
OFUSG04547.1	1131.7	6.53412	0.765412	8.19744	2.45555e-16	7.24451e-15	.	.	.	.	.	.	.	.	.	.	.	TGAGCCAAGCTACAATTCATACAACAAGAAATCAGCACCTACAAAAGAACGCTATGAACCAAGCTATAACCCACCAAGCTACAATGAACCACAGCCAAGTTACAACAAGCCTGCAAGTTACGACAAACCAAGAAAATCAACCTCATACAATTCACCAAGAAAATCTGCCAAATCATTCGACGTCGACTCGTACGAGCCCTGCGATGGTAAAAATGACGGCGACTATGTCCTCTCTGCCGTATTCCGCAAGAAATTCCCAGACGTAAGCCCCGAGTGTGCCTTCGTCAAGTGTGCCAATTACAGAACATGGTTAACTCCATGTGGCTACGGGACTAAAAACAACAAGTACGGCAAAGGCTACTGTAGACATCTCGATCTTCTTGGCAAATGCGGCAAACC…	EPSYNSYNKKSAPTKERYEPSYNPPSYNEPQPSYNKPASYDKPRKSTSYNSPRKSAKSFDVDSYEPCDGKNDGDYVLSAVFRKKFPDVSPECAFVKCANYRTWLTPCGYGTKNNKYGKGYCRHLDLLGKCGKPPTKKSKKSRYVRKSADYLNGGEGGYLNDEESYDSVSPDETEEVVRTPKSLYSSYDEVTI	2.07475	4.34449	494.43	224.018	2791.34	1795.39	5201.8	5267.55	5309.07	7640.6	778.633	938.728	100.725
OFUSG11159.3	9835.05	6.5321	1.03127	6.54961	5.76889e-11	8.95726e-10	MYOSIN-7B	MYS_ARGIR^MYS_ARGIR^Q:115-5859,H:6-1920^70.057%ID^E:0^RecName: Full=Myosin heavy chain, striated muscle;^Eukaryota; Metazoa; Spiralia; Lophotrochozoa; Mollusca; Bivalvia; Pteriomorphia; Pectinoida; Pectinoidea; Pectinidae; Argopecten	MYS_ARGIR^MYS_ARGIR^Q:115-5859,H:6-1920^70.057%ID^E:0^RecName: Full=Myosin heavy chain, striated muscle;^Eukaryota; Metazoa; Spiralia; Lophotrochozoa; Mollusca; Bivalvia; Pteriomorphia; Pectinoida; Pectinoidea; Pectinidae; Argopecten	PF02736.20^Myosin_N^Myosin N-terminal SH3-like domain^32-71^E:1.7e-13`PF00063.22^Myosin_head^Myosin head (motor domain)^86-764^E:2e-284`PF00612.28^IQ^IQ calmodulin-binding motif^782-800^E:0.0036`PF01576.20^Myosin_tail_1^Myosin tail^842-1921^E:7.4e-168	.	.	.	PTHR45615:SF29	GO:0030016^cellular_component^myofibril`GO:0016459^cellular_component^myosin complex`GO:0032982^cellular_component^myosin filament`GO:0051015^molecular_function^actin filament binding`GO:0005524^molecular_function^ATP binding`GO:0005516^molecular_function^calmodulin binding`GO:0003774^molecular_function^motor activity	GO:0030016^cellular_component^myofibril`GO:0016459^cellular_component^myosin complex`GO:0032982^cellular_component^myosin filament`GO:0051015^molecular_function^actin filament binding`GO:0005524^molecular_function^ATP binding`GO:0005516^molecular_function^calmodulin binding`GO:0003774^molecular_function^motor activity	GO:0003774^molecular_function^motor activity`GO:0005524^molecular_function^ATP binding`GO:0016459^cellular_component^myosin complex`GO:0005515^molecular_function^protein binding	GCTTTAGAATCAAGCTCGTTTCTCTGATAGGCTTTGTATCGGCGTCCAGATTCTATAGAACGTTTTATTTCGAGTGAACATCAAACAAACACAAACATGAGTGGGCTTCCCCCAGGCGATCCGGACTTCGAGTTCCTTGGAGTTGACCGAAAGGCCCTCCTAAAGAGTTTCACTGGCTCCTTCGACAGTAAGAAGAACTGCTGGGTGCCCAATGCCAAAGAAGGCTTCGTCAAGGCCGAGGTGGAGAGCACCAAAGGCGAGGAAGTCACAGTCAGAACTGAGAAAATGGAGACTCTCACTCTGAAGAAGGATGACATCCAACAGATGAATCCCCCAAAATTCGAGATGATTGACGATATGGCCAACTTGACCTTCTTGAATGAAGCTTCTGTCCTCCAT…	MSGLPPGDPDFEFLGVDRKALLKSFTGSFDSKKNCWVPNAKEGFVKAEVESTKGEEVTVRTEKMETLTLKKDDIQQMNPPKFEMIDDMANLTFLNEASVLHNLRARYTKGLIYTFSGLFCIAINPYRRLPIYSMRVVTKWRGKKKTEVPPHLFTITEVAFQQMITDRENQSILITGESGAGKTENTKKVIQYFAYVAAATKKDDSKKDDKGSKKGSLEDQIVQANPVLEAYGNAKTVRNNNSSRFGKFIRIHFGPSGKIAGADIETYLLEKARVTSQGKIERNYHIFYQLTSNAIEGMCEKLLIEPDPGLYNFVNQGALTVDGIDDVEEMKITDEAFDILGFTADEKLSMYKITCAIMHFGEMKFKQRPREEQAEADGTAEAEKCAFLLGVNSNDLTKA…	3.1335	19.2803	1492.31	1071.46	8612.46	10223.7	33361.7	47812	49391.4	58190	22975	20484.2	11752.7
OFUSG09228.2	1155.68	6.51342	0.522762	12.4307	1.77965e-35	2.5346e-33	GLUTAMINASE, ISOFORM H	GLSK_RAT^GLSK_RAT^Q:302-1876,H:144-669^56.955%ID^E:0^RecName: Full=Glutaminase kidney isoform, mitochondrial;^Eukaryota; Metazoa; Chordata; Craniata; Vertebrata; Euteleostomi; Mammalia; Eutheria; Euarchontoglires; Glires; Rodentia; Myomorpha; Muroidea; Muridae; Murinae; Rattus	GLSK_RAT^GLSK_RAT^Q:302-1876,H:144-669^56.955%ID^E:0^RecName: Full=Glutaminase kidney isoform, mitochondrial;^Eukaryota; Metazoa; Chordata; Craniata; Vertebrata; Euteleostomi; Mammalia; Eutheria; Euarchontoglires; Glires; Rodentia; Myomorpha; Muroidea; Muridae; Murinae; Rattus	PF17959.2^EF-hand_14^EF-hand domain^36-124^E:4.7e-23`PF04960.16^Glutaminase^Glutaminase^146-432^E:2.8e-113`PF12796.8^Ank_2^Ankyrin repeats (3 copies)^454-512^E:5.3e-09`PF13637.7^Ank_4^Ankyrin repeats (many copies)^459-508^E:3.2e-05`PF13606.7^Ank_3^Ankyrin repeat^487-515^E:6.9e-05`PF00023.31^Ank^Ankyrin repeat^487-508^E:0.0002	.	.	KEGG:rno:24398`KO:K01425	PTHR12544:SF29	GO:0005829^cellular_component^cytosol`GO:0005759^cellular_component^mitochondrial matrix`GO:0005739^cellular_component^mitochondrion`GO:0045202^cellular_component^synapse`GO:0004359^molecular_function^glutaminase activity`GO:0042802^molecular_function^identical protein binding`GO:0007268^biological_process^chemical synaptic transmission`GO:0006537^biological_process^glutamate biosynthetic process…	GO:0005829^cellular_component^cytosol`GO:0005759^cellular_component^mitochondrial matrix`GO:0005739^cellular_component^mitochondrion`GO:0045202^cellular_component^synapse`GO:0004359^molecular_function^glutaminase activity`GO:0042802^molecular_function^identical protein binding`GO:0007268^biological_process^chemical synaptic transmission`GO:0006537^biological_process^glutamate biosynthetic process…	GO:0004359^molecular_function^glutaminase activity`GO:0006541^biological_process^glutamine metabolic process`GO:0005515^molecular_function^protein binding	AGCTACAGTGTAGACTCATCGCTAGTAGTTCACTTAGCAAGATCCTCTGAGCTTCTGTCACCCCTGCTGTCTGACAGCTTTGGCGAGTAACACCTTTGGCGAGTAACAGCTTTGGCGTGTAACATCTTTGGATATCTCTGCTTGTAATTGCGTAAGAGCTTCGGCGTGCAGTGTGACCCTAGGTGTCTGTAAAACAATGGCTTCCACGACTAAAATCAGTAATATTGACAAAGACTTTATATTAGGAGACTTCAAAAAACTGTGCGCCGAGCAGCTGAGTCGAGTTACCAAGCCAACAGACATTGAAGATGTACTCTTCAATCTTCTCAAGAGTGGAGATATGGTCAGCATCCAGAAATTCTGGGCTGCGCTAGAAATGACTGGATTAAGGGAGACTGA…	MASTTKISNIDKDFILGDFKKLCAEQLSRVTKPTDIEDVLFNLLKSGDMVSIQKFWAALEMTGLRETDPRLKETKANLDDVREKHLYDTDESNDEKVDRETFKKCTHDNIVLIGMAFKNEMVIPEFWDFTGHIDTLYYSCQKNTQGTPAQYIPQLARADPNLWGISVCTVDGQRHSIGDTTKPFSIQSCSKPLTYALAMSEIGVDETHKYVGQEPSGRSFNELTLDCRNKPHNPLINAGAIITAGLLKRKHPISERFEYTQLMYSLLAGGEYTGFSNSTYLSERATADRNFALGYYMKEHGCFPEGSDLVETLEFYFMLCSIEITAESGAVIAATLANGGICPITGEKVLSGDAVRNTLSLMYSCGMYDYSGQFAFHVGLPAKSGVAGAVLLVVPNLMG…	58.4288	28.9842	4471.73	4018.6	7244.81	6134.32	2597.39	2742.8	1136.95	935.331	499.969	916.514	395.295
OFUSG04867.1	96.6642	6.49958	1.55273	3.87774	0.000105432	0.000580478	FORKHEAD BOX PROTEIN H1	FAST3_XENLA^FAST3_XENLA^Q:235-531,H:75-173^51.515%ID^E:4.93e-28^RecName: Full=Forkhead activin signal transducer 3;^Eukaryota; Metazoa; Chordata; Craniata; Vertebrata; Euteleostomi; Amphibia; Batrachia; Anura; Pipoidea; Pipidae; Xenopodinae; Xenopus; Xenopus	FAST3_XENLA^FAST3_XENLA^Q:235-531,H:75-173^51.515%ID^E:4.93e-28^RecName: Full=Forkhead activin signal transducer 3;^Eukaryota; Metazoa; Chordata; Craniata; Vertebrata; Euteleostomi; Amphibia; Batrachia; Anura; Pipoidea; Pipidae; Xenopodinae; Xenopus; Xenopus	PF00250.19^Forkhead^Forkhead domain^28-107^E:5.4e-25	.	.	KEGG:xla:100337554`KO:K09400	PTHR11829:SF340	GO:0032444^cellular_component^activin responsive factor complex`GO:0005634^cellular_component^nucleus`GO:0003700^molecular_function^DNA-binding transcription factor activity`GO:0019904^molecular_function^protein domain specific binding`GO:0043565^molecular_function^sequence-specific DNA binding`GO:0046332^molecular_function^SMAD binding`GO:0001702^biological_process^gastrulation with mouth formin…	GO:0032444^cellular_component^activin responsive factor complex`GO:0005634^cellular_component^nucleus`GO:0003700^molecular_function^DNA-binding transcription factor activity`GO:0019904^molecular_function^protein domain specific binding`GO:0043565^molecular_function^sequence-specific DNA binding`GO:0046332^molecular_function^SMAD binding`GO:0001702^biological_process^gastrulation with mouth formin…	GO:0003700^molecular_function^DNA-binding transcription factor activity`GO:0043565^molecular_function^sequence-specific DNA binding`GO:0006355^biological_process^regulation of transcription, DNA-templated	GCAAATTATTTTTCAAAACGTGAGACCAGTGAAACATTGGCGAGAAGGACAAAGGGACATTTGGAAACCCGCACGAGATTGGAGGCAAAATTTGAAATCATTATAGTTGTGAAAATTATCTAAAGAAACTCTAAGATGCCGATTGACAAGACACATGCGCATAGTACTTGGAGACAAGAGATTCGCGGCACAAAAACGCCATACAGGCGTTACCCTAAACCGCCATATAGCTACCTCGGGCTGATGGTAACTGCGATTTATAACTCACCGGATCAGCAACTTTCTCTCTCGGACATCTGCCGTACACTGGAGAACATGTTTCCATTCTTCAAGCAGGAGTACAGAGGATGGAAGGACTCCGTGAGACACAACCTATCACATAATACATGCTTCGTTAAA…	MPIDKTHAHSTWRQEIRGTKTPYRRYPKPPYSYLGLMVTAIYNSPDQQLSLSDICRTLENMFPFFKQEYRGWKDSVRHNLSHNTCFVKRLKDPAFPNKKGNFWAVDLDKVPHDAFKRQDTSVARESAFSIDLHTELNLPGIPVAKNDSATIQTSFGLEVPHSETFSQRKFGPSLAFSVENILKKDTVKKDSKSRLSTGSDTSASSDCNGNAQSPRFINSSDRSPLSNAKSNAPTGYPYPFHLIQNIMYPYTYAYPSPVSYQPILATLPTQQDLGHLSNAHALATSNYSNIYTKHSPVVSHALPRDRDEELGKIDFPSNNSLLTFADYALQHGHC	7.30521	0	779.489	1042.84	190.876	454.031	0	79.0508	1.42862	1.92114	8.69481	5.04369	0.199544
OFUSG16876.1	77.7999	6.4834	1.22055	4.83096	1.35879e-06	1.08893e-05	DEFECTIVE PROBOSCIS EXTENSION RESPONSE DPR -RELATED	.	.	PF07679.17^I-set^Immunoglobulin I-set domain^121-206^E:3e-09`PF13927.7^Ig_3^Immunoglobulin domain^121-203^E:4.6e-09`PF07686.18^V-set^Immunoglobulin V-set domain^122-210^E:4.3e-09`PF00047.26^ig^Immunoglobulin domain^123-204^E:4.4e-06	sigP:1^16^0.652^YES	.	.	PTHR23279	.	.	.	ATTTCCATATGTCTAATTCATACGTGGCATCAATTTGGAAACAGAACACACTGTCAATCTACCATTGTATTATAAAACCATCAACTAGCAGATACACAGTGTAGCACTAGGATGAAGCCACTCTTGATACTTAGCGCAATCTTTGGATATGCATGTTCACGTGTAGTGAATAATTCTGAAACTACGCAAGACCATGTTTTTACAACACTAGAAAATAGTACAACATTAGAGAGTACAACATTAGAGAGCACAACACCAAAGAATTCAACACCAGAAAATGTACGAACAGAGATTACAACATCAGAGAATTCAACAACAGAAAATGTAATAACAGAGAGTACAACATCAGAGAATTCAACAACAGAAAATGTAATAACAGAGAGTACAACACTTGAGACT…	MKPLLILSAIFGYACSRVVNNSETTQDHVFTTLENSTTLESTTLESTTPKNSTPENVRTEITTSENSTTENVITESTTSENSTTENVITESTTLETTIAPTINRKHHEFRRKHWLPYFKDNTPSNTSVDLGGRAKLTCHVGILGTRTVIWKRSSDNVLLTVGLFTFVYDERIRAEHNPGSNESSLIIENAKLSDDGIYECRVSSKTPVVWKVRLTVQENATPENVTTESTTSESRRKENVITESTTPETATAPTINN	2.07644	0	169.194	178.922	31.7113	57.1766	23.9043	47.687	124.552	46.7372	256.092	240.445	855.969
OFUSG17982.1	1171.63	6.47979	0.387372	16.7135	1.04498e-62	8.14419e-60	PAIRED BOX POX-MESO PROTEIN	PAX5_XENLA^PAX5_XENLA^Q:334-996,H:8-221^59.211%ID^E:9.14e-75^RecName: Full=Paired box protein Pax-5;^Eukaryota; Metazoa; Chordata; Craniata; Vertebrata; Euteleostomi; Amphibia; Batrachia; Anura; Pipoidea; Pipidae; Xenopodinae; Xenopus; Xenopus	PAX5_XENLA^PAX5_XENLA^Q:334-996,H:8-221^59.211%ID^E:9.14e-75^RecName: Full=Paired box protein Pax-5;^Eukaryota; Metazoa; Chordata; Craniata; Vertebrata; Euteleostomi; Amphibia; Batrachia; Anura; Pipoidea; Pipidae; Xenopodinae; Xenopus; Xenopus	PF00292.19^PAX^'Paired box' domain^46-170^E:5.6e-70	.	.	KEGG:xla:378499`KO:K09383	PTHR45636:SF16	GO:0005634^cellular_component^nucleus`GO:0003677^molecular_function^DNA binding`GO:0003700^molecular_function^DNA-binding transcription factor activity`GO:0007275^biological_process^multicellular organism development`GO:0006355^biological_process^regulation of transcription, DNA-templated	GO:0005634^cellular_component^nucleus`GO:0003677^molecular_function^DNA binding`GO:0003700^molecular_function^DNA-binding transcription factor activity`GO:0007275^biological_process^multicellular organism development`GO:0006355^biological_process^regulation of transcription, DNA-templated	GO:0003677^molecular_function^DNA binding`GO:0006355^biological_process^regulation of transcription, DNA-templated	ACGACGTTGGAAGAGCTACTAATACGATGTACAATATTTGCTGGTATATATGAACATATCATTGAATGATCAATACTTTTTATCTCTTTGAAACAACTGAAGTGAAACTTGTCAGTGATTCGGAAAAATCAACACAACCTACATCGTTCGTTGACAAATATTTAGGAGTAATTCTTTCATTGATTATTAATCGGACACCGCTTGTGGGATTTGCATTAAATGATGCTATACACAGAGAGCAATGCTATGGATTTGGCGGCGGGACCGTATAGGTACCCGCACCCAAATAGCATGCAACGACCCACACACATAAACCCGCAGTTGCATATGGTGGACTACTACCATTCTTGTAAAAGTCACGGTGGAGTAAACCAACTAGGAGGGGTGTTTGTGAATGGA…	MMLYTESNAMDLAAGPYRYPHPNSMQRPTHINPQLHMVDYYHSCKSHGGVNQLGGVFVNGRPLPDVVRQRIVELAHQGVRPCDISRQLRVSHGCVSKILGRYYETGSVTPRVIGGSKPKVATPKVVNAITGYKRESPTLFAWEIREKLLADAVCDEQNVPSVSSINRIVRNQAAEKAKQTGQSPNPVISQSPTGPTQGQGGYSINGILGIPSSVNQGVPMPNPVDPTGNKRKRDDGVPNGQEEVTNNNTEDPQMWFERQTKLAKVVDTSSDHMTQGQGHMTTNGYSLQYTQHPQNFGATSRNQTAGAEMKSSAVDAVYQNIQGITVQTTSGQNNSTTENNRTPGNYTPPAGLTGNSLTTLTPVSTEGDVKPVIGPDGQVQSTSSTAHYSETNNNSIQGE…	73.0149	100.967	7662.46	8195.09	2647.08	3926.68	558.968	770.345	479.754	429.094	1715.47	1821.53	2473.06
OFUSG05949.1	97.2382	6.47078	1.13685	5.53538	3.10553e-08	3.27317e-07	T-CELL LEUKEMIA HOMEOBOX PROTEIN 3-LIKE PROTEIN	TLX3_MOUSE^TLX3_MOUSE^Q:529-918,H:150-280^70.992%ID^E:4.26e-48^RecName: Full=T-cell leukemia homeobox protein 3;^Eukaryota; Metazoa; Chordata; Craniata; Vertebrata; Euteleostomi; Mammalia; Eutheria; Euarchontoglires; Glires; Rodentia; Myomorpha; Muroidea; Muridae; Murinae; Mus; Mus	TLX3_MOUSE^TLX3_MOUSE^Q:529-918,H:150-280^70.992%ID^E:4.26e-48^RecName: Full=T-cell leukemia homeobox protein 3;^Eukaryota; Metazoa; Chordata; Craniata; Vertebrata; Euteleostomi; Mammalia; Eutheria; Euarchontoglires; Glires; Rodentia; Myomorpha; Muroidea; Muridae; Murinae; Mus; Mus	PF00046.30^Homeodomain^Homeodomain^194-250^E:1.1e-20	.	.	KEGG:mmu:27140`KO:K15607	PTHR24333:SF6	GO:0005654^cellular_component^nucleoplasm`GO:0005634^cellular_component^nucleus`GO:0001228^molecular_function^DNA-binding transcription activator activity, RNA polymerase II-specific`GO:0000978^molecular_function^RNA polymerase II cis-regulatory region sequence-specific DNA binding`GO:0048513^biological_process^animal organ development`GO:0001708^biological_process^cell fate specification`GO:0007…	GO:0005654^cellular_component^nucleoplasm`GO:0005634^cellular_component^nucleus`GO:0001228^molecular_function^DNA-binding transcription activator activity, RNA polymerase II-specific`GO:0000978^molecular_function^RNA polymerase II cis-regulatory region sequence-specific DNA binding`GO:0048513^biological_process^animal organ development`GO:0001708^biological_process^cell fate specification`GO:0007…	GO:0003677^molecular_function^DNA binding	ATGGAGGACTGTCGCAGTGATACGGACGAGGTTCGGAGTACTATTTCAAGGAGCTCAACCCCAAGTAACCACAGTTTAGAGACCGCATCGACTGCATCTGGTGTGAACAGAAAACTTTCTTTCGGAATATCAGCTATTCTTGGTCATCTAGATGACGAACAAAATGATACATCGGGTGAGCGGACGTCTAGCGAAGGAACCGTGAGCGGACCTCCGACGCCACCAAGCGGCTGTCACCCGAGCTCACTACCGGGGTTCGCCCCATCATTGTTCCCCCTGAATAGATCAAGGGACACTTTTAAACCATATGCAATGCACAATGCACTTCCAGTTTTGCCAAAAGTAGAGGTCGATTATAACGGCCTGCAGCATCTCCATTCACACTCTAGTCATGGCATT…	MEDCRSDTDEVRSTISRSSTPSNHSLETASTASGVNRKLSFGISAILGHLDDEQNDTSGERTSSEGTVSGPPTPPSGCHPSSLPGFAPSLFPLNRSRDTFKPYAMHNALPVLPKVEVDYNGLQHLHSHSSHGILGYNLPAPRSFTIGGAMSPNHGVLGNYTPTLDNANHDVNASIAVQRRVGHPYQNRTPPKRKKPRTSFTRIQIMELEKRFHGQKYLASAERSSLAKSLKMSDSQVKTWFQNRRTKWRRQTAEEREAERQAAKRFMAGITNDSNTLYETTVNRDPVCLNNSSLNAMQSITPWSEDRMNFSNVQIPNHQTAMV	9.37213	0	880.355	320.57	210.668	365.209	171.703	174.627	119.802	136.022	76.9585	117.255	25.5623
OFUSG01531.1	1510.66	6.4671	1.20311	6.01441	1.80543e-09	2.29937e-08	SUBFAMILY NOT NAMED	.	.	PF13676.7^TIR_2^TIR domain^613-722^E:7.4e-20	.	.	.	PTHR46270:SF1	.	.	GO:0005515^molecular_function^protein binding`GO:0007165^biological_process^signal transduction	AACATAGCGGGTTAACTTCAAATTTGCTTACTGGTCATGTGACTAGCAACAAGGTGAGGTTAATCAAACATGGCGACAAAGGCATAAACAGCATGTAGTAAGCACTCACTACAATACTATAGTGAAATATATAGCTGCTCGGATATCACTAAGAACATCTTAGATAAAATAAGACATTGTTTAGCATCACAGAGCACAACATTACCCAGAATTCAACATGGGTTGCGGCAGCAGCAAGTCCATGTATCATGATGATGCTAATGCTGATGAGATAGTTGAAATGCTCGCAGAAAAACGACGTAGGAAAAAGGAACAAAAGGAAAGGAAAGATGTAACTGTACATAACGTCTCACAATATAACCAGCAACATGTTGAAGCTGGAAGTTCAGGCGAACATGA…	MGCGSSKSMYHDDANADEIVEMLAEKRRRKKEQKERKDVTVHNVSQYNQQHVEAGSSGEHERLLRTSDWVQRNPAPTPVTRRERRAQRLREQQAAEAETSSDSSESESSSSEDESSESEHESEKEKHEFENAEKALPQEEQIVTTQANTSGQTINLTIHLESPQKELNVNVPINTPAAPSPEPIMSSTYKEDKSSCTNDTSIASITQTHIEIVPTNETGTQMDLESPRSVPSVEKKKKKKEKKKHKKVRHREEEIEEDVGFTDSFSQTETWIGELRKRMSRLHQMEDFCMGSPFEDLMWVSKLIYTSSREELRAEMVKKVYELGIIEIVIKLWDSVTQNGFVASENYIAVKNLKRAVSIMWNSSDLSKEFCQTLVDRGVVQRLFLGLMHPRMDITSVKT…	5.21925	57.9143	4289.9	2074.94	3447.47	3076.53	3117.09	2600.6	3453.3	3454.33	6122.26	4828.51	2980.73
OFUSG13912.1	333.899	6.4651	0.759554	7.88418	3.16619e-15	8.13496e-14	SUBFAMILY NOT NAMED	.	.	.	.	.	.	PTHR23169:SF29	.	.	.	ATGAAAGATAAAATAGATAGACTTGCTGTCATCTTGGAAGAGGAAGGGGAAGAGGCGGAAGAAGGTGGAAGTCTATTCACTTCATTAGTCCTTCAGATTGGGTCCCTTGAACAGTTGATGGCAAAATACAAAGACTTTTGGACTTACTGGGAGACATTCAAGGTCCTTTGCGAAACATCAAAGCAACCAAAGTACATGCTAATTGTAGACAAATGGGAACAGTTGAAATTTGTGACCACTGCTTACTTTCTGAAATATTGGCATACTGACCTCACTGTTGATGAACTAGATGCCAAGGAGGAAGTAGCCATCTTGTATGACACGCCACATGAAAAATTAAACCAGGAGGTGAATGTAGAAAAGATTGTGAAACATGTTGAGGATAGTGACGAGATAATC…	MKDKIDRLAVILEEEGEEAEEGGSLFTSLVLQIGSLEQLMAKYKDFWTYWETFKVLCETSKQPKYMLIVDKWEQLKFVTTAYFLKYWHTDLTVDELDAKEEVAILYDTPHEKLNQEVNVEKIVKHVEDSDEIIRSTQEERKTFYIRAVIDPRTDAEMSIQQAVDEGVMDQKAGLYVNPKTGHSIPIPTAMSRGLILVDYTSTRKSAETKESFGLITIKTTKENKPYVITGVVDSSADDAVISFEKATEKGIIDLHDGVYRDPITKREQLLADAIDGNLVSVADQNGQNGETELVTKTYAIHHVVNQKLKKKITFSEAVRDGILDKNTGSYLNNITGERIYVGDAIMRGFLKATVVEDPTTLDIDPENKMVVSKVENIRKRLLQPMKALSAFKQAMKK	3.12876	1.07443	170.476	297.328	791.188	843.562	954.474	1143.21	1248.22	1220.82	1117.18	663.965	539.336
OFUSG09078.1	2008.55	6.43965	0.417358	15.0756	2.34324e-51	9.39205e-49	RE42927P-RELATED	.	.	.	sigP:1^20^0.765^YES	.	.	PTHR12231:SF250	.	.	.	cttaaacagaatattTCACTTTTGGTTACCTCTAGAAGTTAGTATGTTCAATAAGTAATAATGGCAGTACTTCCCTAGACTACTTGACACCCACCCCAAGCAAATGTTGTAAGTAATAACGCATTTTATCTTATGACCTAAATTTTAAATCATTGTACATCGATTTGAATATTCTCCGCTGATAAGCGTGTCTCATATTTGAAATATGCACGTTATACATTGAAGGCGTTTATTAGTCATATCACAAATATCGTAAAAAAGACAACGCAACAAAGACTGTACCTGACTGTATATAGATAGTAAAGAGATATCAAACTAAGGACAACGGATAAAAGAGAGAGGGTAGAGCTAGTGTAGAGGACGAACTGGGATTCTATTAACAACACAGAACAAAGAGGA…	MDKFLSTILLLTLTAYTSRAIVEPKDHATREGVSVTFTCDPGQPEPQEYIQWWEFVTSSTTPNLIFNPAKPNEYDSTRYDFANAGRNFTIKSPMLSAGGKYECRRLVDASNHPVELIVLKSPDCRNQRASNPPHEGENAELTCQVEYRGNRVPVPMWYTEQGSQLPMQYARDVTGVAVKSTNFTTNDQHDDTLPRCQVTVAGTPYNDNCTLSSPMRVIYSVRDVDIHHDYDGPGMPRFATGDKLNCTARGYPDPEFTWSKVKGRGANMTMNGFQFEVPRGLSGEYTFMCTAFNTVNRTDYNSTKDITFVATGYTGGSQSMFGLSVMLLTVVSILQIVLQ	8.33796	8.60663	815.261	758.744	4647.22	3753.41	7931.67	8169.47	6493.24	5816.1	3784.68	3972.16	7922.38
OFUSG12775.1	789.71	6.43476	0.830747	7.7184	1.17798e-14	2.83697e-13	BETA,BETA-CAROTENE 15,15'-DIOXYGENASE	RPE65_CYNPY^RPE65_CYNPY^Q:390-1946,H:1-530^25.965%ID^E:2.3e-29^RecName: Full=Retinoid isomerohydrolase;^Eukaryota; Metazoa; Chordata; Craniata; Vertebrata; Euteleostomi; Amphibia; Batrachia; Caudata; Salamandroidea; Salamandridae; Pleurodelinae; Cynops	RPE65_CYNPY^RPE65_CYNPY^Q:390-1946,H:1-530^25.965%ID^E:2.3e-29^RecName: Full=Retinoid isomerohydrolase;^Eukaryota; Metazoa; Chordata; Craniata; Vertebrata; Euteleostomi; Amphibia; Batrachia; Caudata; Salamandroidea; Salamandridae; Pleurodelinae; Cynops	PF03055.16^RPE65^Retinal pigment epithelial membrane protein^33-536^E:2.8e-72	sigP:1^16^0.739^YES	.	.	PTHR10543:SF24	GO:0005789^cellular_component^endoplasmic reticulum membrane`GO:0016020^cellular_component^membrane`GO:0005886^cellular_component^plasma membrane`GO:0052885^molecular_function^all-trans-retinyl-ester hydrolase, 11-cis retinol forming activity`GO:0052884^molecular_function^all-trans-retinyl-palmitate hydrolase, 11-cis retinol forming activity`GO:1901612^molecular_function^cardiolipin binding`GO:00…	GO:0005789^cellular_component^endoplasmic reticulum membrane`GO:0016020^cellular_component^membrane`GO:0005886^cellular_component^plasma membrane`GO:0052885^molecular_function^all-trans-retinyl-ester hydrolase, 11-cis retinol forming activity`GO:0052884^molecular_function^all-trans-retinyl-palmitate hydrolase, 11-cis retinol forming activity`GO:1901612^molecular_function^cardiolipin binding`GO:00…	GO:0016702^molecular_function^oxidoreductase activity, acting on single donors with incorporation of molecular oxygen, incorporation of two atoms of oxygen`GO:0055114^biological_process^oxidation-reduction process	TTTGGTCTAAGAGAACTTATTAAATGCTTGGGCTATGATCTGAATGTTAAGACAATAAAGAAAGTATCGCAACTCCTTATGCCAACATTAAAAAAGTTATTAATTAAATCATTATGGATAACATAAAACATATTAAATTAACTGGGAATACAATACATGGTTATCTGACAATATAAAATGAGATTAAATAAAGACAGCAAAATGTTGCATTCTTTTGGGATCACCCTGTATATTGCATGAAAGTAGTTCCAGTCATTACATTATCAATGAGTGATCTAATGTACACAAGTGGAATATAAAAGAACTCCCAGGGCACAGTAAAGGAACAGAATATTTTCATCATGTTCCAACTGAGCATCTTCATAGCTTTGTTTGCAATTGCTCAAACTGTTTCCAATG…	MFQLSIFIALFAIAQTVSNVTKEDSKGYGLLFTSLTREVEDVKLRFELPGGIPKWIKGTLVKNGPGKFEMGHKRVNHAFDGFGKLSSWRFAGDGKSVTFSTKLQQTGYYRDSVKLNTIAPYTLFGDTVPAETTEERIKRTMKGMDNNVVNVKALTKQLSIDTNYMILNDMWNLYTININNLTLVKHLAPLVGEDEESLMDMMMDANKMAVPSLSSAHPLFEGSRDNWITYYIKLNPLGKSIFNVIRMGNDIKPRLLTSWKIDTFEIPYMHSFGLTEKYVVFFEGPCYFELFHFAFSGTFEMKEAFQCHHDNPMYIKVVELATGKVTELKTHDINAKGLFLHSINSYEVNSTTIVADATQLPNFDQMTGLTLDNMLNVDKRNAILANGQVTRYYLNLKTG…	32.3273	27.9408	2941.27	3463.82	3585.42	4765.06	787.775	1554.91	526.193	951.002	785.846	1146.26	640.809
OFUSG23823.1	547.978	6.41901	0.69144	9.09441	9.51053e-20	3.87282e-18	FAMILY NOT NAMED	CX065_HUMAN^CX065_HUMAN^Q:79-348,H:2-98^34.021%ID^E:1.44e-06^RecName: Full=Uncharacterized protein CXorf65;^Eukaryota; Metazoa; Chordata; Craniata; Vertebrata; Euteleostomi; Mammalia; Eutheria; Euarchontoglires; Primates; Haplorrhini; Catarrhini; Hominidae; Homo	CX065_HUMAN^CX065_HUMAN^Q:79-348,H:2-98^34.021%ID^E:1.44e-06^RecName: Full=Uncharacterized protein CXorf65;^Eukaryota; Metazoa; Chordata; Craniata; Vertebrata; Euteleostomi; Mammalia; Eutheria; Euarchontoglires; Primates; Haplorrhini; Catarrhini; Hominidae; Homo	PF15874.6^Il2rg^Putative Interleukin 2 receptor, gamma chain^32-117^E:2.1e-22	.	.	KEGG:hsa:158830	PTHR33887	.	.	.	ATGGAAGGAAAAATCTTAACAAGGACTGCTTCAAGCATTGCTATGGATGATTACCTGACAAGACCCAAAACGCCGCAATTCATTACTGTCAAATATGGAGATAACAAAAAACTGGTGCTGAATCCCTGGTGCCGATGCAAGGTTCTCCTGGAGCATCTACACACAGCAGCAGAATGTGCCGACGGAGTAATTGTTGATCTCGTGGACCCTGATGGACGAGTGAAGCACCTGTCGTCAAAACCAAACGAATACGCCAGTGAACAAGTTAGGAGTAGAGGGACGTTCATTCTGATCAGAGTCGAGAAGCAAGAAGGAGAAGCATTACCCGACAAATACCATCCGCTATTATCAAGAACAATATTAGACGAGCAGTATCCGGATTTAAGAGGACAGTTAGCT…	MEGKILTRTASSIAMDDYLTRPKTPQFITVKYGDNKKLVLNPWCRCKVLLEHLHTAAECADGVIVDLVDPDGRVKHLSSKPNEYASEQVRSRGTFILIRVEKQEGEALPDKYHPLLSRTILDEQYPDLRGQLANLSRSQTPLSSSMSKRLRRMGTVSKIKVMSKEVGKEKRSKKAR	5.1907	6.50624	961.009	308.694	1484.4	744.378	2530.66	1255.57	1851.65	1286.43	2208.44	2001.77	143.145
OFUSG04095.1	618.182	6.41672	1.14872	4.81026	1.50731e-06	1.19837e-05	FAMILY NOT NAMED	GRIK3_MACFA^GRIK3_MACFA^Q:670-2829,H:10-734^29.404%ID^E:9e-79^RecName: Full=Glutamate receptor ionotropic, kainate 3;^Eukaryota; Metazoa; Chordata; Craniata; Vertebrata; Euteleostomi; Mammalia; Eutheria; Euarchontoglires; Primates; Haplorrhini; Catarrhini; Cercopithecidae; Cercopithecinae; Macaca	GRIK3_MACFA^GRIK3_MACFA^Q:670-2829,H:10-734^29.404%ID^E:9e-79^RecName: Full=Glutamate receptor ionotropic, kainate 3;^Eukaryota; Metazoa; Chordata; Craniata; Vertebrata; Euteleostomi; Mammalia; Eutheria; Euarchontoglires; Primates; Haplorrhini; Catarrhini; Cercopithecidae; Cercopithecinae; Macaca	PF01094.29^ANF_receptor^Receptor family ligand binding region^42-353^E:7.4e-35`PF10613.10^Lig_chan-Glu_bd^Ligated ion channel L-glutamate- and glycine-binding site^419-529^E:1.6e-21`PF00497.21^SBP_bac_3^Bacterial extracellular solute-binding proteins, family 3^437-685^E:7.3e-08`PF00060.27^Lig_chan^Ligand-gated ion channel^549-713^E:1.1e-19	sigP:1^22^0.493^YES	.	KEGG:mcf:102130684`KO:K05203	PTHR36902	GO:0043197^cellular_component^dendritic spine`GO:0016021^cellular_component^integral component of membrane`GO:0045211^cellular_component^postsynaptic membrane`GO:0001640^molecular_function^adenylate cyclase inhibiting G protein-coupled glutamate receptor activity`GO:0004970^molecular_function^ionotropic glutamate receptor activity`GO:0007216^biological_process^G protein-coupled glutamate receptor…	GO:0043197^cellular_component^dendritic spine`GO:0016021^cellular_component^integral component of membrane`GO:0045211^cellular_component^postsynaptic membrane`GO:0001640^molecular_function^adenylate cyclase inhibiting G protein-coupled glutamate receptor activity`GO:0004970^molecular_function^ionotropic glutamate receptor activity`GO:0007216^biological_process^G protein-coupled glutamate receptor…	GO:0004970^molecular_function^ionotropic glutamate receptor activity`GO:0016020^cellular_component^membrane	TCCCCAAATCCATGTTTTATTTACAGGACGCCGCTCAAGCTGTTTGATGTAGTATCGATGCATCGTCCCAAAGAGGAAAACATCAAATCTCTGATTTGCGCTAATCTGCGATCCGAAATTGCAACTTTCTTATAAATCATTTGCAACAGTAGCAACATTGAACTCTAAGTGGATGCATATGACATGCAGACTACCACGAAAAACTAACTAAATCAACTTTGGATATGACAGAATTAATTTTCGGCAAATCTGTTGCCAATGAGACTTCCATGAAGACATGATAACCTTCTCTTTTCCAACCTCACTTTTTCAACTTGTTTATCGAAATCATGTAAGCAATTTGAAAAACTAAGAAATTTGATATTGCAGCAAGGTTCTAGCGCCCGACACGGTAATAAA…	MASYQFGITVLAFLIKLGDIDGQPSSIRLGALIKSRDTGGIEAAFTYSIFKVNQATGILPRTVLTFDIKYVDIHSTYMDMQQGACAQVSTGVMGIFGPQLGSMSDQVASMCSSLEIPHIETAMNLGSSMTTDFTLNLFPPVQLLSRAYIEYMQYLKWTNVTVVYTQSNTGIHLGILTAASEARLGIRAFHLDEAASDWRGKLREMKESGAYTFFVDLEPVMLISFLKQTQQMGMSDDRYHYIFSDLDSQHVTLDDFKYSGVKISALALYDRNDTATKNISRNMLRYARQNNIEGINRDSEIGTEAMLMYEAVIIFARALHSLDKATEVVEPSGLSCRRRDRTWSHGATMFNYLNIEADTAGKGNLLHILQMARDRRKTLVKAGVWRADAGIEILNDQYE…	1.04433	0	83.3792	148.018	440.571	379.916	1270.85	1945.42	3257.77	4187.07	1599.61	1808.02	1464.53
OFUSG19167.1	2030.97	6.40935	0.845174	7.55363	4.23292e-14	9.56225e-13	.	.	.	PF14113.7^Tae4^Type VI secretion system (T6SS), amidase effector protein 4^74-199^E:6.6e-11	.	.	.	.	.	.	.	CTGGAGTGGCTGATTGCACTGCTAAATTAGCGTCACTTTATAAATGTGTGACTCTATTGAACAGCACTTCAAGACGGTTTATATTGACATTGTTAACACTGACACCTATTGGTGGGCACAGGAACTAGTGTGAAATCAACACAGATGGCAGGTTCTTTGTAAGCGAGCCAATCACAGGAGGAGACTCAATTACTTTGATAACACAATAACACCAAAGAGCATTCTGCTGTTAGCCTACCCTGGCCATTTATAAGCAACAGAGTGGAGAGTGAATTCAGAAATCAAAAGATGAACGAAGGAGCAACATCATAGGTTACAGTTAATAAACAACAAACATCACCATGTGGGACTTAAATATAAACACACTACATATATACAGCATAAACATGTCAACTTTAA…	MWDLNINTLHIYSINMSTLTWILLSISITVSQSFELPKFSDMKQYYLGYTQYSGNFRDQDVIKLIGGSGKTRFHDTAALRLSYVLNRIGHEHAIGTKRIKISKHNKDSYRGGNNEQYIFRNVAFGPYLAKKYGNPIILKPHKYNSAKTMWPILGKQGLVRFVTYQKQKPNGHIALWDCDKFYQSPDWTKENRLVSVEFWESPDSHCTVKQDAKKYWWATWRMTMDSTNDANTLENDTTYDTKRQPLFRHFNKYRKTQKHL	90.7156	64.4921	9373.29	7152.4	6818.06	5680.66	3664.38	3299.15	3231.87	3029.18	3861.75	4470.88	3841.55
OFUSG08364.1	1943.77	6.40802	0.797865	7.20878	5.64539e-13	1.12735e-11	PROTEIN CBG18423-RELATED	.	.	.	sigP:1^16^0.882^YES	.	.	PTHR39377	.	.	.	GCCTAATTGGCAACACTCCTGGTATCTATAGGGCCAAATGACATTAATTAATAAGCAAGGTGCATCTTTGCTAGAGGGCTCGTACATGATATAAAAACTTTATGTGGTTTATGGTGTCATCATCAACTCTCTGTAGCTTTGCAATACAACAGATCTCAATTCAGTATGATGAAGTTAGTGTGCCTAGTAGTCCTTGTGACAGTCACCCTTGCCCATCCAAGCCGTCGCTATGGTTACGCAACCCGTTACTACAGCAATGTAGGATACACTGGATACGGTAACGCCTACCAGAACAGAGAATATGTGCCATACGGAAATGGCTACCCATACGCCAATGTTGGACCCAACAAAGCTGTCGTCAAATCCCCATCCGGACTGCTCATTGGAGACAATGGTGGC…	MMKLVCLVVLVTVTLAHPSRRYGYATRYYSNVGYTGYGNAYQNREYVPYGNGYPYANVGPNKAVVKSPSGLLIGDNGGYVSAQYEKVVGPNDAAIRGDTDGDRDLVVGDNGGYISEAYDKVVGPNDAVVRPEIIRGDNGAYIDVVNGRVVGNNGRVAGYAYGY	3.10312	0	201.191	148.85	1679.4	686.501	8906.19	6503.6	14868.2	14039.4	2373.13	2869.99	198.508
OFUSG15417.1	114.491	6.4065	1.15794	4.5392	5.64681e-06	4.02931e-05	STABILIN	STAB1_HUMAN^STAB1_HUMAN^Q:628-1107,H:831-987^39.264%ID^E:6.54e-17^RecName: Full=Stabilin-1;^Eukaryota; Metazoa; Chordata; Craniata; Vertebrata; Euteleostomi; Mammalia; Eutheria; Euarchontoglires; Primates; Haplorrhini; Catarrhini; Hominidae; Homo`STAB1_HUMAN^STAB1_HUMAN^Q:505-1110,H:1387-1582^32.857%ID^E:1.89e-13^RecName: Full=Stabilin-1;^Eukaryota; Metazoa; Chordata; Craniata; Vertebrata; Eutele…	STAB1_HUMAN^STAB1_HUMAN^Q:628-1107,H:831-987^39.264%ID^E:6.54e-17^RecName: Full=Stabilin-1;^Eukaryota; Metazoa; Chordata; Craniata; Vertebrata; Euteleostomi; Mammalia; Eutheria; Euarchontoglires; Primates; Haplorrhini; Catarrhini; Hominidae; Homo`STAB1_HUMAN^STAB1_HUMAN^Q:505-1110,H:1387-1582^32.857%ID^E:1.89e-13^RecName: Full=Stabilin-1;^Eukaryota; Metazoa; Chordata; Craniata; Vertebrata; Eutele…	PF12947.8^EGF_3^EGF domain^80-110^E:3.2e-09`PF12947.8^EGF_3^EGF domain^124-155^E:6.3e-08`PF07645.16^EGF_CA^Calcium-binding EGF domain^201-240^E:2e-06`PF12947.8^EGF_3^EGF domain^210-240^E:1.6e-08	sigP:1^27^0.807^YES	.	KEGG:hsa:23166`KO:K19020	PTHR24038	GO:0030666^cellular_component^endocytic vesicle membrane`GO:0005887^cellular_component^integral component of plasma membrane`GO:0005886^cellular_component^plasma membrane`GO:0005509^molecular_function^calcium ion binding`GO:0005540^molecular_function^hyaluronic acid binding`GO:0030169^molecular_function^low-density lipoprotein particle binding`GO:0005041^molecular_function^low-density lipoprotein…	GO:0030666^cellular_component^endocytic vesicle membrane`GO:0005887^cellular_component^integral component of plasma membrane`GO:0005886^cellular_component^plasma membrane`GO:0005509^molecular_function^calcium ion binding`GO:0005540^molecular_function^hyaluronic acid binding`GO:0030169^molecular_function^low-density lipoprotein particle binding`GO:0005041^molecular_function^low-density lipoprotein…	GO:0005509^molecular_function^calcium ion binding	ATAAAAATAAGATAACATGGCATTTTAAAACCGGTTGTTGCATTCAATTTTAGATAACAAGGGTGGTCGAAATTGCCATGGGAAACTTTGAAtaaattaatcaaactaattaaactaattaaatATTTTATAGCAATAATATTCTGTGTCTAAGCAAATGATGTATATATTTTTATAGGAGTAGGGTACAACTTAACTGAAAGCTAAAAAATGTTTTTTTAAATATTAGATCAGCATGGTACCTAATGTTTTTAACCAATCATAACGTTAAATTTACAATCTAAACACGGTGATGGTTACAGCCTACCAATGCTATATATAAAATTGCACAATTAATGTCATTGACTCATACGTTAGGAGGCCGAGCGAAAACGAAATAAGATTAAAATGGCACGACCC…	MARPKRSRAIWLAFLIICVMNIKNGIADLCLDNAIFCDPNSFCNTNLDGFGLPSCTCFQGHEKDEFGVCQPTDPCLTLVPCDPMAECYSTGGSDYTCTCQPGFEGDGFTCTEAVVDPCADPALNNCDANAECTPGSDDRVNCTCKPGFLGNGTSCYPDPCNSPFNICNYNANCTPVSETEVNCVCKSGFLGNGTSCTEAVVDPCTDPALNNCDINAECANTNGGVSCTCLPGYQGNGTDCKM	1.04017	0	104.618	77.3216	313.692	192.679	386.631	533.11	664.606	652.34	53.54	79.3309	13.0759
OFUSG20537.1	314.24	6.39835	0.55446	11.4466	2.44563e-30	2.39919e-28	APONTIC	.	.	PF13873.7^Myb_DNA-bind_5^Myb/SANT-like DNA-binding domain^30-106^E:4.5e-14	.	.	.	PTHR21411	.	.	.	CTGTTTAATACTAAACTATTAAAGCAGAATATAAAGAACATGTAACACAGTCAAAACTAGCTAAGGTATTCAAATAAAATTACATGTCGAACAGTGCTAGGATAAAGAAGTATTTTTGAAACTAGTCTGTACATGTAGAATCTGTTATATTAGCAGATGAAAATGTTGATGTGTTTTGTAAATACAGCAGGTAATAGGAATAGCACAATAGACACACATAATACAATAAGATAAAATATTAAAGAAGATTTGTAATACTGAATATACATTGTGTATATATCAACAATACTAAGTTCAAGAAATCAATTCACAGAGAAATTACAACAAAAAAATGCTTTCAAAGCGCCAAACAAGAAAAAAATTTGATTAAGACCATCTCAATCAGTATCGGAAATATTT…	MQRMDYMNQEHQMGSRYKMHNTVYKNRGSRGENWTSAEKEFILEEIAKRISIIDNKGVSTDWLKCKNEAWAAIYKNYMKKFGTATARDTKQLKECWKRLKQQARKEGRELEDEGKILTSDRDSIGLRIYKMLREVETSNNARTPQDIQHAEYFMPANSVNDQNEASNVSLADVSVPKIIKIELQDRPVNDNQSESFELDNPQNVEVTKTPYLDRSGKTSAIEENEKQYAPGIKRKLDGNESNDGNAMKHLYNGPTHTQPQYSVASTHNIVTHSQNDVANSPDMSIQNSVATTHSHTGVRQIYHPITDQHITQTTDRPCLYNDDIKRRHEQVLENINRYYDAKYESLNAEHQLKMEVLQVKRQTAIEKLMQLQKLNNS	13.555	16.1236	2165.76	827.413	1694.76	1238.38	784.666	632.584	328.522	221.642	191.005	132.493	43.4391
OFUSG03263.1	288.472	6.39655	1.10372	4.69077	2.72174e-06	2.06556e-05	.	.	.	.	.	.	.	.	.	.	.	TCAGAATTCACAAACATTACTAGTAGGATATATGTTCTTTTCAAAAATGATCAAATAAGAAAATGAAATAAACCACATCAAGAAAGAATCATCAAACAGATGAGCCGAGTAAGGTCAAGGTCATTTAACAGTCATAACAATGTGGCATCAATTTTATAGtttctatttAGGGATATTTCTGATCTTACCCGCTTTAATAATCACGCTTCTTGTCTACTGTGTTCTGGGGTACTGGCATAGTCAATACAAGGTACCCAAGCATGTTAGGAAAACTACGTGTAATGTTCCAACAGATCAAAAGATGATGCCGATATCGGACGGAGGCATGGAGGAGACTAGCGTTGCCATACCCTACTACCCCTCAGCATACAGCCTCCAGTCATCAAGCATGTACAGTTC…	MWHQFYSFYLGIFLILPALIITLLVYCVLGYWHSQYKVPKHVRKTTCNVPTDQKMMPISDGGMEETSVAIPYYPSAYSLQSSSMYSSMTPQKKPHPSAYNI	0	1.09811	64.4343	129.937	424.85	419.635	1281.09	973.202	1444.88	959.538	537.991	731.203	812.326
OFUSG19692.1	819.104	6.38815	0.556542	11.3967	4.34222e-30	4.18659e-28	ADAMTS-LIKE PROTEIN 5	ATL5_HUMAN^ATL5_HUMAN^Q:384-1238,H:48-315^36.332%ID^E:2.89e-50^RecName: Full=ADAMTS-like protein 5;^Eukaryota; Metazoa; Chordata; Craniata; Vertebrata; Euteleostomi; Mammalia; Eutheria; Euarchontoglires; Primates; Haplorrhini; Catarrhini; Hominidae; Homo`ATL5_HUMAN^ATL5_HUMAN^Q:1518-1817,H:372-472^27.451%ID^E:7.39e-06^RecName: Full=ADAMTS-like protein 5;^Eukaryota; Metazoa; Chordata; Craniata; Ve…	ATL5_HUMAN^ATL5_HUMAN^Q:384-1238,H:48-315^36.332%ID^E:2.89e-50^RecName: Full=ADAMTS-like protein 5;^Eukaryota; Metazoa; Chordata; Craniata; Vertebrata; Euteleostomi; Mammalia; Eutheria; Euarchontoglires; Primates; Haplorrhini; Catarrhini; Hominidae; Homo`ATL5_HUMAN^ATL5_HUMAN^Q:1518-1817,H:372-472^27.451%ID^E:7.39e-06^RecName: Full=ADAMTS-like protein 5;^Eukaryota; Metazoa; Chordata; Craniata; Ve…	PF00090.20^TSP_1^Thrombospondin type 1 domain^46-100^E:3.9e-09`PF05986.15^ADAM_spacer1^ADAM-TS Spacer 1^209-325^E:2.6e-26`PF01759.22^NTR^UNC-6/NTR/C345C module^426-525^E:1.7e-13	.	.	KEGG:hsa:339366	PTHR13723:SF173	GO:0031012^cellular_component^extracellular matrix`GO:0005576^cellular_component^extracellular region`GO:0001527^cellular_component^microfibril`GO:0008201^molecular_function^heparin binding	GO:0031012^cellular_component^extracellular matrix`GO:0005576^cellular_component^extracellular region`GO:0001527^cellular_component^microfibril`GO:0008201^molecular_function^heparin binding	.	CAGTTTGAGAAGAAAAAGCGAAGTACTACCAACGTTACAAGTGGGCAAATATTCTGAGCCAGCCTGTACTGTTAGTCGTAGTATCGAGACACAGTGCGGCTTTGTGGCAGATGAAAGTAGAAGCCCATTGGAAGGACAGGGCCAACAACTACTGCGCGATACAATTAAACTAAATTACAGTATACAGTTCATGTTTATACTTGCGATGCAGAAACGATTTATATTTTGGAAGGGATGTGAAACGTAGAAAGATGCAAGGGGAATACATCCTCGTATTCTATGGATTGTTAACGTTGGGGCAATATATACAAGCACGATCGAATAGACAGCACACCTGGCAATATCAAAATGACGACATCAAAAGTACGTCACTACAAGAGACATGGTCGGGGTGGTCTC…	MQGEYILVFYGLLTLGQYIQARSNRQHTWQYQNDDIKSTSLQETWSGWSQWSACSRTCGLGAISRYRECVGQVGGRVIRLKEPTCPGQKHEFVQCNTQVCPDDSGGNADYLSEQCTKHNSFFLGSQQYTWVPYKPSGVSNPCQLVCMSKKYKFYYNFGNVVDGTPCGAKKVCVRGSCLSTGCDGKIGSDEEVDQCMVCGGRNLTCLHIKGQFTQKLPGPETDYYGYNEIATIPAGATYINITDKHKNIYIAIQKENKDFVINGDRKIDYPGKYSTVGTTLYYDRAWDSSENLHAKGPTTEMLYVKVLVSSREKINPGITYEYWIHKDKYPNDLDPVKNTFTDNDIYKPTYTKPPTKPTKVDDKLTTARAVGHPPYKENTVDKSVRNSRTKYRKHGSATS…	13.5594	15.0387	1396.05	1228.87	2199.3	3056.68	878.174	945.417	1630	1550.23	2475.51	1272.39	5388.05
OFUSG17398.1	175.119	6.38536	0.927225	6.27432	3.51163e-10	4.92876e-09	GLYCOPROTEIN HORMONE RECEPTOR	GLHR_ANTEL^GLHR_ANTEL^Q:1504-2283,H:554-809^22.932%ID^E:8.32e-12^RecName: Full=Probable glycoprotein hormone G-protein coupled receptor;^Eukaryota; Metazoa; Cnidaria; Anthozoa; Hexacorallia; Actiniaria; Actiniidae; Anthopleura	GLHR_ANTEL^GLHR_ANTEL^Q:1504-2283,H:554-809^22.932%ID^E:8.32e-12^RecName: Full=Probable glycoprotein hormone G-protein coupled receptor;^Eukaryota; Metazoa; Cnidaria; Anthozoa; Hexacorallia; Actiniaria; Actiniidae; Anthopleura	PF00001.22^7tm_1^7 transmembrane receptor (rhodopsin family)^286-536^E:3.3e-13	sigP:1^30^0.568^YES	.	.	PTHR24372	GO:0016021^cellular_component^integral component of membrane`GO:0005886^cellular_component^plasma membrane`GO:0004930^molecular_function^G protein-coupled receptor activity`GO:0016500^molecular_function^protein-hormone receptor activity	GO:0016021^cellular_component^integral component of membrane`GO:0005886^cellular_component^plasma membrane`GO:0004930^molecular_function^G protein-coupled receptor activity`GO:0016500^molecular_function^protein-hormone receptor activity	GO:0004930^molecular_function^G protein-coupled receptor activity`GO:0007186^biological_process^G protein-coupled receptor signaling pathway`GO:0016021^cellular_component^integral component of membrane	ATTTTAATATCTTTGATATAAACTGACAATCGTTGATTTTGGCACAACTTTTGAAAACACGTGTCGAGAACCACATACGTAAGTGCACACATGGGTTTGATAGGAATTGAGGAATTGAGAAGAGCAGAAACAAGATGAAAGCCTATGATTACCTTGTTGAGTGTGGTAATTCAGATAAAGAGGGTAGAAGGGAGAAGTTGTATGGCAACAGAGAGCAGTGAAACCCTGATAAGATACAAGTCACTGTTAAAATCTACTTGGGCAGAGAAGACATTATCAGGTCAGCCTTGAATGGGACAGTAACTGTTAGCTGGACAATGGTCATTGATAATATAACCTGAGAGGATTTCAACTGAACAATATTCAAAGACTTGGCATTGTAAACATCTTTAACAGTAT…	MDITQLKTATMSVPGTLLLLPLLFSSSTSSTRNNLEIQRIPNFTIVENLNFTHLGLMEVQTNFTDIRKAIKEARSKKSDNWGIDTKNIIASVIKALNITTEDLISEIFNNTILRIPEIITEINKTIIDTQDDCPKVCKCGFDNTTNMFLTNCSHQNLTTLPEVLPIETQYLDISKNYLIVLNKSTLYPLIDLQVMDTRGNYYLERLPIIRLRGFFRQNITKIYTDFGKTCCMFEIEWELDSGPAVRSQARDACQADIPYTECSQSLLTMDGFIIYLIIVILSPILNGWVLLVTFGLKKRRTKPTTLLDGHFAIANLLTTLYSAVILVHGVKYYNRYHYAMEEWLHSVGCSVIGYFFIVATLMSTFLYMIDIVEAYAKISNPMREWKHLNLKTTYIILAV…	0	3.22001	77.9007	306.622	521.059	554.583	330.214	546.338	317.381	409.125	547.045	595.175	508.711
OFUSG07317.1	917.18	6.37737	0.712524	8.98549	2.57588e-19	1.00377e-17	RE52086P	CALL3_RAT^CALL3_RAT^Q:488-910,H:3-143^32.624%ID^E:9.69e-19^RecName: Full=Calmodulin-like protein 3;^Eukaryota; Metazoa; Chordata; Craniata; Vertebrata; Euteleostomi; Mammalia; Eutheria; Euarchontoglires; Glires; Rodentia; Myomorpha; Muroidea; Muridae; Murinae; Rattus	CALL3_RAT^CALL3_RAT^Q:488-910,H:3-143^32.624%ID^E:9.69e-19^RecName: Full=Calmodulin-like protein 3;^Eukaryota; Metazoa; Chordata; Craniata; Vertebrata; Euteleostomi; Mammalia; Eutheria; Euarchontoglires; Glires; Rodentia; Myomorpha; Muroidea; Muridae; Murinae; Rattus	PF13833.7^EF-hand_8^EF-hand domain pair^3-31^E:0.0051`PF13499.7^EF-hand_7^EF-hand domain pair^5-64^E:9.2e-11`PF13405.7^EF-hand_6^EF-hand domain^5-29^E:3.1e-05`PF13202.7^EF-hand_5^EF hand^6-26^E:0.00042`PF13833.7^EF-hand_8^EF-hand domain pair^24-64^E:0.0019`PF13499.7^EF-hand_7^EF-hand domain pair^76-135^E:2.5e-10`PF13405.7^EF-hand_6^EF-hand domain^76-105^E:1.1e-06`PF13202.7^EF-hand_5^EF hand^78-99…	.	.	KEGG:rno:307100`KO:K02183	PTHR23050:SF330	GO:0005509^molecular_function^calcium ion binding`GO:0030234^molecular_function^enzyme regulator activity`GO:0019722^biological_process^calcium-mediated signaling`GO:0000226^biological_process^microtubule cytoskeleton organization	GO:0005509^molecular_function^calcium ion binding`GO:0030234^molecular_function^enzyme regulator activity`GO:0019722^biological_process^calcium-mediated signaling`GO:0000226^biological_process^microtubule cytoskeleton organization	GO:0005509^molecular_function^calcium ion binding	AGTTTCAAactgTCCATAATTCATTACAATTGAATTTTAAATACACTCTTAAAAGTTAATGGGTTTTCCCTTGAAACCCCATGCTTCAACTAGTCAGAAATGTTGTATAAAAAACTTCTCTCATTAAACAAAATTGGGACTTTTGCCAAAAGTCTACAGAAACCTAAGAATGTTACTTTTTGTTCTGAGGTCATAAGTTGGCGTCTGATAGCGGTCACACCAACTCGAAGTCTGGCTTCGCTCTCACTTCGCTGGTGGATAACGTATCGAGAAGCACGCTAGTAGTAAGTCTAGGAAGGCGCAGAACCACTCGCTCAAGACTACCACACTGAACAGACCAATCAACAAAACACAATCATTGACTGGCATACGAACGAAGCCACCTGATTGCGACTGATT…	MTDYEAFFKEADTDNSGFLTLSELKGCLVKRGYKGTSGELENLFNKADQSGDDKMSFEEYMVVMGAASPEQHKAARMREVFNGFDKDGSGEVDKAEMDQVFKEMGKHLSEAEIARMIQLADTDGSGTLNISELIKHCFGVDM	17.7064	46.3218	3479.1	2033.86	2247.51	2434.68	1863.03	2135.06	667.664	922.692	2705.5	2027.41	3752.63
OFUSG19662.1	180.109	6.37554	0.469603	13.2499	4.51753e-40	8.50659e-38	HYDROXYLYSINE KINASE	HYKK_XENLA^HYKK_XENLA^Q:250-1392,H:15-370^35.401%ID^E:3.17e-62^RecName: Full=Hydroxylysine kinase;^Eukaryota; Metazoa; Chordata; Craniata; Vertebrata; Euteleostomi; Amphibia; Batrachia; Anura; Pipoidea; Pipidae; Xenopodinae; Xenopus; Xenopus	HYKK_XENLA^HYKK_XENLA^Q:250-1392,H:15-370^35.401%ID^E:3.17e-62^RecName: Full=Hydroxylysine kinase;^Eukaryota; Metazoa; Chordata; Craniata; Vertebrata; Euteleostomi; Amphibia; Batrachia; Anura; Pipoidea; Pipidae; Xenopodinae; Xenopus; Xenopus	PF01636.24^APH^Phosphotransferase enzyme family^61-302^E:9.3e-17	.	.	KEGG:xla:398833`KO:K18201	PTHR21064:SF1	GO:0005737^cellular_component^cytoplasm`GO:0047992^molecular_function^hydroxylysine kinase activity	GO:0005737^cellular_component^cytoplasm`GO:0047992^molecular_function^hydroxylysine kinase activity	.	ttgacctgtttccaggtttattaaaagtaaacaatgtaatgatactttcctgaagaaagcaaggaaatacagaaatgccctcatacttaattttgtaccagaaaataacatgtgcagATACAACACAAGTGAAGATGAACTCATTTTATCATTCCATTTAATTAAGAAAGCTTGAGCAGGAAACATATTACAATGGCAAATGGTGAAGGATTTCCAACACAGTATGACCAAATAGGATATGTCCATCCACCGCAGATGAATGAACGTGTGGCAGAGGACTTGGTAACAATCTTATATGGAATGGAGGTAACTTCTATCACACCATTGGTCAGTTACAGTGATAAGAACTACTATGTGACAGTGAAGGATGTCAACAACAACCCTAATGTTGAAACTCTT…	MANGEGFPTQYDQIGYVHPPQMNERVAEDLVTILYGMEVTSITPLVSYSDKNYYVTVKDVNNNPNVETLWPHGYTLKITNSIDSQTNHTAAEHLFQGLLADHGIPCPRPVLNTHGDDQSMETIYTPTSQQEGWVSNAEDNRDRMYGRHVVRLLTYIPGKTLNSVPHTAHLFHSAGKMMGNVHKILKESNFEHPAYEDYQTMWNMTSVPKLADLLHVLSTPDDNKLIQDIIEQFQKQVVTNYEKMRKGIIHGDFTDYNLLVKSTGQSSESTDLQSHELYEVFGVLDFGDSCSSYYVFDVAIGICYLMLESSIVDPLHVGGHFLAGYESEFEINKTEFEVLRVCVAARFAQSLVLGLSYSKRDPGNTYLLTGQKNGWIVLKKLWNCPSTSLYATWQDITKS…	6.24916	7.54116	595.453	616.016	626.495	678.536	453.049	519.471	328.826	563.369	92.3547	134.16	36.2224
OFUSG06468.1	466.893	6.36772	0.635975	9.85436	6.56307e-23	3.53436e-21	GLUTATHIONE S-TRANSFERASE S1	HPGDS_CHICK^HPGDS_CHICK^Q:19-630,H:4-199^41.667%ID^E:1.69e-42^RecName: Full=Hematopoietic prostaglandin D synthase {ECO:0000305};^Eukaryota; Metazoa; Chordata; Craniata; Vertebrata; Euteleostomi; Archelosauria; Archosauria; Dinosauria; Saurischia; Theropoda; Coelurosauria; Aves; Neognathae; Galloanserae; Galliformes; Phasianidae; Phasianinae; Gallus	HPGDS_CHICK^HPGDS_CHICK^Q:19-630,H:4-199^41.667%ID^E:1.69e-42^RecName: Full=Hematopoietic prostaglandin D synthase {ECO:0000305};^Eukaryota; Metazoa; Chordata; Craniata; Vertebrata; Euteleostomi; Archelosauria; Archosauria; Dinosauria; Saurischia; Theropoda; Coelurosauria; Aves; Neognathae; Galloanserae; Galliformes; Phasianidae; Phasianinae; Gallus	PF02798.21^GST_N^Glutathione S-transferase, N-terminal domain^8-75^E:1.2e-08`PF14497.7^GST_C_3^Glutathione S-transferase, C-terminal domain^100-205^E:1.2e-22`PF00043.26^GST_C^Glutathione S-transferase, C-terminal domain^116-195^E:2.4e-09	.	.	KEGG:gga:395863`KO:K04097	PTHR11571:SF234	GO:0005829^cellular_component^cytosol`GO:0005654^cellular_component^nucleoplasm`GO:0005509^molecular_function^calcium ion binding`GO:0004364^molecular_function^glutathione transferase activity`GO:0000287^molecular_function^magnesium ion binding`GO:0004667^molecular_function^prostaglandin-D synthase activity`GO:0042803^molecular_function^protein homodimerization activity`GO:0006749^biological_proc…	GO:0005829^cellular_component^cytosol`GO:0005654^cellular_component^nucleoplasm`GO:0005509^molecular_function^calcium ion binding`GO:0004364^molecular_function^glutathione transferase activity`GO:0000287^molecular_function^magnesium ion binding`GO:0004667^molecular_function^prostaglandin-D synthase activity`GO:0042803^molecular_function^protein homodimerization activity`GO:0006749^biological_proc…	GO:0005515^molecular_function^protein binding	ATGTCTTCAAAGTCGAAATTCACATTGACATATTTCACAGTAAGGGGTAGAGGTGAGCTGATACGGCTGCTGTTTCATTATGCTGGCAAAGAATTTGAGGATGTCCGGATAGAATGGAAAGATTGGGCAGCTTTGAAGCCAGATACCCCTTACTTGTCCCTCCCTATATTGGAACATGGAGGTGTTACGATAGGACAGAGTGTCAGCATTGCTAGATATGTGGCCAAGGAACTAGGTCTTGCTGGTAAGACAACACTGGAACAAGCTCTTACAGATGGGATTAATGACTCAATAACAGACACATTCAACGAATTAACTAAACATCACTTTGAACAAGATGAAACAAAAAAGGAAGAACTGAAGTCTAAGTACATGACGGAGACTCTCCCTAAGTGGTGT…	MSSKSKFTLTYFTVRGRGELIRLLFHYAGKEFEDVRIEWKDWAALKPDTPYLSLPILEHGGVTIGQSVSIARYVAKELGLAGKTTLEQALTDGINDSITDTFNELTKHHFEQDETKKEELKSKYMTETLPKWCELIEKQLETKVNGDGTWLVGDQISWADIGVFNFLNCMELMKLDNGFSRYPNLNALKERVQALEGISKYISERPESTI	12.4603	3.2519	933.94	471.808	1368.49	908.49	1655.43	925.606	2268.95	1342.29	1426.68	808.473	436.075
OFUSG21199.1	42.637	6.36266	1.01288	5.58624	2.32041e-08	2.49439e-07	NUCLEOLAR PROTEIN 4-LIKE PROTEIN	NOL4_MOUSE^NOL4_MOUSE^Q:118-321,H:81-152^52.703%ID^E:6.58e-12^RecName: Full=Nucleolar protein 4;^Eukaryota; Metazoa; Chordata; Craniata; Vertebrata; Euteleostomi; Mammalia; Eutheria; Euarchontoglires; Glires; Rodentia; Myomorpha; Muroidea; Muridae; Murinae; Mus; Mus	NOL4_MOUSE^NOL4_MOUSE^Q:118-321,H:81-152^52.703%ID^E:6.58e-12^RecName: Full=Nucleolar protein 4;^Eukaryota; Metazoa; Chordata; Craniata; Vertebrata; Euteleostomi; Mammalia; Eutheria; Euarchontoglires; Glires; Rodentia; Myomorpha; Muroidea; Muridae; Murinae; Mus; Mus	.	.	.	KEGG:mmu:319211	PTHR12449:SF22	GO:0005730^cellular_component^nucleolus	GO:0005730^cellular_component^nucleolus	.	TCTTATGAGCCAAGTGTAACGAATTTTTATTTTTACGAAATTGCTATCTGGTCATGGCATCTGCTTATTAAAGCTTTGAAGTTCTTAGCCTATCAAATATTTGAGTTCCTATGGCATATGTTTATCTTATTGCAGGCTGAAGATGCTCCAGACGAAGACAGGGTCTACAAACGTGTGGCAGTGGTGGAAGATTTCTTCGATATTATATATTCTGTACATGTTGAAATGGAGGGACGAAGTGGAAAACATGCGGGACAAAAACGAACCTACAAAGCGGTGAGTCGCCGTACAGTGATGTTTGGTCCTCATTGCTTAGTTACATCTCATACATGACTG	SYEPSVTNFYFYEIAIWSWHLLIKALKFLAYQIFEFLWHMFILLQAEDAPDEDRVYKRVAVVEDFFDIIYSVHVEMEGRSGKHAGQKRTYKAVSRRTVMFGPHCLVTSHT	2.02394	0	132.468	106.394	154.467	163.174	68.4444	101.088	68.3663	79.9117	75.4988	127.621	70.4813
OFUSG05964.1	2263.67	6.33118	0.64218	9.79601	1.17117e-22	6.2234e-21	LD42267P	PXDN_XENTR^PXDN_XENTR^Q:1137-2942,H:731-1331^38.951%ID^E:4.94e-117^RecName: Full=Peroxidasin;^Eukaryota; Metazoa; Chordata; Craniata; Vertebrata; Euteleostomi; Amphibia; Batrachia; Anura; Pipoidea; Pipidae; Xenopodinae; Xenopus; Silurana	PXDN_XENTR^PXDN_XENTR^Q:1137-2942,H:731-1331^38.951%ID^E:4.94e-117^RecName: Full=Peroxidasin;^Eukaryota; Metazoa; Chordata; Craniata; Vertebrata; Euteleostomi; Amphibia; Batrachia; Anura; Pipoidea; Pipidae; Xenopodinae; Xenopus; Silurana	PF01607.25^CBM_14^Chitin binding Peritrophin-A domain^40-87^E:1.2e-06`PF01607.25^CBM_14^Chitin binding Peritrophin-A domain^159-204^E:3.1e-09`PF03098.16^An_peroxidase^Animal haem peroxidase^379-919^E:1.1e-189	sigP:1^29^0.679^YES	.	KEGG:xtr:493201`KO:K19511	PTHR11475:SF4	GO:0005615^cellular_component^extracellular space`GO:0020037^molecular_function^heme binding`GO:0046872^molecular_function^metal ion binding`GO:0004601^molecular_function^peroxidase activity`GO:0042744^biological_process^hydrogen peroxide catabolic process`GO:0006979^biological_process^response to oxidative stress	GO:0005615^cellular_component^extracellular space`GO:0020037^molecular_function^heme binding`GO:0046872^molecular_function^metal ion binding`GO:0004601^molecular_function^peroxidase activity`GO:0042744^biological_process^hydrogen peroxide catabolic process`GO:0006979^biological_process^response to oxidative stress	GO:0008061^molecular_function^chitin binding`GO:0006030^biological_process^chitin metabolic process`GO:0005576^cellular_component^extracellular region	TAAAAATTGAGAAAATGAAGAACGTTCACATGGGTTCCGTATCCACGCTGCTGCTGGTTTTAGCTATTTCAATCTCATTATCAACCTCTTCGAGATTGAAGAGAGACGTAGATGGATTCTGCAGAGGTAAAGCTGACCACAGCATTAACGCCGATCCTACTAGTTGCTACCATTATATCTATTGCACTGGTGGGTACCAGTTCAGAGCGATATGCCAGGCAGGACTTGTGTTTAACCCTATAATAAATAGCTGCGACTATGGGGAGTGTAACACTGCTCAAGCACCAGAATCCACCAATGAGGTGTATGAAGATAATGGCCATAGAGAAAAGAATCGGGAAGAGAAGCGATCAACGGCAAATCTTCACGTTGCGCCAACCGAATACGTTGCACCAACTG…	KIEKMKNVHMGSVSTLLLVLAISISLSTSSRLKRDVDGFCRGKADHSINADPTSCYHYIYCTGGYQFRAICQAGLVFNPIINSCDYGECNTAQAPESTNEVYEDNGHREKNREEKRSTANLHVAPTEYVAPTEYVAPTEYVAPVTQYREPSTESFDDYCKFRSDGTHHDPYDCHNYIYCANGVPYKQKCPGSLVYNHDLGGCDFGSCPQNAQGYVPKKAREENNHVVPTNYVETTVEETYQATHSSSDNDDMKSKIEEMLPSVMNKAMESLITKMDDEKTASRSVGNSNRPFKKVQRFLVARPMAKKLSQCAHVLCNASTVLMDYFKLDKVTALNIFSDIHSPIPASSHLLKPDDAYPDPDPNTCPWPRYDCGTGLELYRSYTGACNNIYNPLWGRSFT…	8.35087	15.0146	1259.95	809.117	7278.08	4345.45	10195.6	12037	9560.44	12489.5	1090.73	1490.7	492.316
OFUSG12040.1	273.809	6.31876	1.11259	5.54372	2.96117e-08	3.12925e-07	EARLY GIRL, ISOFORM A-RELATED	PZRN3_RAT^PZRN3_RAT^Q:39-425,H:1-129^39.394%ID^E:6.76e-24^RecName: Full=E3 ubiquitin-protein ligase PDZRN3;^Eukaryota; Metazoa; Chordata; Craniata; Vertebrata; Euteleostomi; Mammalia; Eutheria; Euarchontoglires; Glires; Rodentia; Myomorpha; Muroidea; Muridae; Murinae; Rattus	PZRN3_RAT^PZRN3_RAT^Q:39-425,H:1-129^39.394%ID^E:6.76e-24^RecName: Full=E3 ubiquitin-protein ligase PDZRN3;^Eukaryota; Metazoa; Chordata; Craniata; Vertebrata; Euteleostomi; Mammalia; Eutheria; Euarchontoglires; Glires; Rodentia; Myomorpha; Muroidea; Muridae; Murinae; Rattus	PF13920.7^zf-C3HC4_3^Zinc finger, C3HC4 type (RING finger)^15-61^E:9.8e-08`PF00097.26^zf-C3HC4^Zinc finger, C3HC4 type (RING finger)^18-58^E:6.6e-09`PF13923.7^zf-C3HC4_2^Zinc finger, C3HC4 type (RING finger)^18-58^E:2.4e-08`PF13639.7^zf-RING_2^Ring finger domain^18-59^E:5.3e-07`PF14634.7^zf-RING_5^zinc-RING finger domain^18-60^E:8.7e-07`PF13445.7^zf-RING_UBOX^RING-type zinc-finger^18-56^E:9.3e-05	.	.	.	PTHR15315:SF93	GO:0005737^cellular_component^cytoplasm`GO:0031594^cellular_component^neuromuscular junction`GO:0061630^molecular_function^ubiquitin protein ligase activity`GO:0004842^molecular_function^ubiquitin-protein transferase activity`GO:0008270^molecular_function^zinc ion binding`GO:0007528^biological_process^neuromuscular junction development`GO:0016567^biological_process^protein ubiquitination	GO:0005737^cellular_component^cytoplasm`GO:0031594^cellular_component^neuromuscular junction`GO:0061630^molecular_function^ubiquitin protein ligase activity`GO:0004842^molecular_function^ubiquitin-protein transferase activity`GO:0008270^molecular_function^zinc ion binding`GO:0007528^biological_process^neuromuscular junction development`GO:0016567^biological_process^protein ubiquitination	GO:0046872^molecular_function^metal ion binding	AGTAAATTCACACAGTAAAAACTCTTTGTAAAATAACAATGGGGTTCGGAGTGCATCGATTCCCCAGTGCAATAGACCAGAACCTGTTGTGTGGTATCTGCAGTGCTGTCTTAGAGGACGCAGTGCTCACACCGTGCGGTCATTCATTCTGCATACGATGTCTACAGACGTGGCTCACCCGACCGGGAGTGATCTCAACCTGTCCGGAATGCCGAACAGAGACAGGCTCAAATGATATCCGACCTATTCACTCAATTCGAAACTTTATCAATGGATTAAATATCGAATGTGATCATTCTGACAGAGGCTGTAAGGCCGTAGTGCATTTGGAGAGGATGAAAGCACACCTGGAAACGTGTAGTTTCGTTCCAGTTGATTGTGCAGGATGTGGCGTGACGG…	MGFGVHRFPSAIDQNLLCGICSAVLEDAVLTPCGHSFCIRCLQTWLTRPGVISTCPECRTETGSNDIRPIHSIRNFINGLNIECDHSDRGCKAVVHLERMKAHLETCSFVPVDCAGCGVTVNRFELAAHQMGCASIQAAVDEDLPGEKPQSIIPNGANSSEVTELACRVATLEMQMRRMKKDLELAELKNKRLDRELKQTKDDLEEKRTQLLDQQYVDYDPDYEYGYAPYTVAKLAQIISKFLHKKPSYLDKDRTFDAIKRCYDNYSRCGDKYEQDVLMLLATANASNWFDNQQRLNFHCWLSSIARYRQFARSLSFAGSSSSANPNTNITKQAR	2.08114	3.23782	352.745	330.112	1257.85	918.903	1232.76	1180.91	512.773	294.749	311.17	181.75	760.118
OFUSG05754.1	208.928	6.29901	0.748655	7.77656	7.45204e-15	1.82764e-13	SUBFAMILY NOT NAMED	PXDN_XENTR^PXDN_XENTR^Q:565-1275,H:88-323^26.556%ID^E:3.06e-18^RecName: Full=Peroxidasin;^Eukaryota; Metazoa; Chordata; Craniata; Vertebrata; Euteleostomi; Amphibia; Batrachia; Anura; Pipoidea; Pipidae; Xenopodinae; Xenopus; Silurana	PXDN_XENTR^PXDN_XENTR^Q:565-1275,H:88-323^26.556%ID^E:3.06e-18^RecName: Full=Peroxidasin;^Eukaryota; Metazoa; Chordata; Craniata; Vertebrata; Euteleostomi; Amphibia; Batrachia; Anura; Pipoidea; Pipidae; Xenopodinae; Xenopus; Silurana	PF13855.7^LRR_8^Leucine rich repeat^14-72^E:3.1e-09`PF13516.7^LRR_6^Leucine Rich repeat^14-28^E:260`PF00560.34^LRR_1^Leucine Rich Repeat^16-34^E:23`PF13306.7^LRR_5^BspA type Leucine rich repeat region (6 copies)^18-68^E:0.31`PF13516.7^LRR_6^Leucine Rich repeat^37-51^E:2.4`PF00560.34^LRR_1^Leucine Rich Repeat^38-49^E:120`PF13516.7^LRR_6^Leucine Rich repeat^64-74^E:220`PF13306.7^LRR_5^BspA type Leu…	.	.	KEGG:xtr:493201`KO:K19511	PTHR45842:SF11	GO:0005615^cellular_component^extracellular space`GO:0020037^molecular_function^heme binding`GO:0046872^molecular_function^metal ion binding`GO:0004601^molecular_function^peroxidase activity`GO:0042744^biological_process^hydrogen peroxide catabolic process`GO:0006979^biological_process^response to oxidative stress	GO:0005615^cellular_component^extracellular space`GO:0020037^molecular_function^heme binding`GO:0046872^molecular_function^metal ion binding`GO:0004601^molecular_function^peroxidase activity`GO:0042744^biological_process^hydrogen peroxide catabolic process`GO:0006979^biological_process^response to oxidative stress	GO:0005515^molecular_function^protein binding	GGACAACGGATAATGTTTGCCATTTATAGAAGACGTTACGCGGTAGTCATATCTAATTGACAAAAGCATCCTCTAGCTATTAGGCTAAACGAAATGGAATGAGAGGTATTCAAAAACTTCAGGTTGGATACACTTAATCTGGAGAAAAATCGGATTAAAGATCTGGAATTCTTGACTTTTACAAAAGCTCGGAGATTACATTTATCCCACAATCCCATCAGAGATTTGAATTTCAATCAATACCCCATTTTTGGTGAAGTCGAGGAATTGTATCTACGGAACATTCATATGAGTCGCTTCAACTGGGATATTTCGTTAACAATGTCCAAAGTTCAATTACTTGATATAGGTAGCAACCATCTCACCAGCATTGGTCCGGGAACCTTTGACTACATGACG…	MSRFNWDISLTMSKVQLLDIGSNHLTSIGPGTFDYMTNLMHIDMSHNDIQTVDKLTWQKHLVIHIDFSHNNISNIDFLENVHVERLYLRSNPIGNIDFSRFPSIRYARILDISDTGLTTITRENLLPLIDIQHLSLADNDIFVLEPSIFDHMMKLKELDISNNKLTSLDKTMLPSLEKLDQCHFKGNPFHCNCELQWLKKSFDDSSSEGRNVSASCRTPFSTEMSTLSLSRMTCRKPVVTRFAGDNDIYGREPFTILCIAEGDPQPTILVRHPSGSTSQENPQAQNKSSYIYSNQIIYKIDRASQSDSGNYECLAKNIEGPSSRKSLTIDIQRGKRFERKGIAVAAAGTLAGAIVGTFIGTILLCILILFLLYKFVYPRLKKKYPPRRIVSSPRDPDKR…	2.08565	2.14926	190.706	235.789	690.612	572.611	741.711	921.058	672.412	598.821	261.567	261.734	399.832
OFUSG03643.1	811.926	6.29614	0.808521	7.24919	4.19267e-13	8.54375e-12	GLI PATHOGENESIS-RELATED 2-RELATED	ECT_ACRMI^ECT_ACRMI^Q:391-1224,H:102-392^30.063%ID^E:3.21e-24^RecName: Full=Ectin {ECO:0000303|PubMed:23765379};^Eukaryota; Metazoa; Cnidaria; Anthozoa; Hexacorallia; Scleractinia; Astrocoeniina; Acroporidae; Acropora	ECT_ACRMI^ECT_ACRMI^Q:391-1224,H:102-392^30.063%ID^E:3.21e-24^RecName: Full=Ectin {ECO:0000303|PubMed:23765379};^Eukaryota; Metazoa; Cnidaria; Anthozoa; Hexacorallia; Scleractinia; Astrocoeniina; Acroporidae; Acropora	PF00090.20^TSP_1^Thrombospondin type 1 domain^134-171^E:3.4e-05`PF00090.20^TSP_1^Thrombospondin type 1 domain^190-233^E:0.028`PF00188.27^CAP^Cysteine-rich secretory protein family^254-378^E:3.1e-14`PF14295.7^PAN_4^PAN domain^411-449^E:0.018	sigP:1^26^0.808^YES	.	.	PTHR10334:SF480	GO:0005576^cellular_component^extracellular region	GO:0005576^cellular_component^extracellular region	.	CTCACTAAGACATAAGATTAGCAGTAGCACAATACAGGAGCACACGGAATGGATGGACTGTGTTGTTTCAAGTTCTGTTTTTTTATCATTGGGCTACTAACCATTGAAGCATCTCTTGCTCATGGTCAGACGTCAAACTGCCCGGGACATGTGTCAAAAAGCAGACCCCCGCCTGGTAATCAAGTGAGCTGTGTGTGGGGAGGCCAGTGGTTCTACATCAGGGTTGGTGGTACGAGTACATTTTGGGGAAGAGGAACAGATGCCGTGTGTCTCTCAACGTACGAGAGGAAGAAGATCTACACAGGTAGAATACACGGGATATACTCAGGAGGAGAAGAGTGTTTCATCAGATGGACGCTTTCTTCTTGTGAGCGTTTACTTAGGTCCAAATGTCCAGTT…	MDGLCCFKFCFFIIGLLTIEASLAHGQTSNCPGHVSKSRPPPGNQVSCVWGGQWFYIRVGGTSTFWGRGTDAVCLSTYERKKIYTGRIHGIYSGGEECFIRWTLSSCERLLRSKCPVVKGTWSSWGDWQENGDYYDCKATCGSGEIRRTRTCENGVDCDGDSVEVEMCDKKCPTTTTPISNTTDGARWTNWENWGSCSEICGKEGYQTRSRECIEGPCIGQLEKGGRTCTNKCSNNSMHIVDSEDWKFVEDCEDTHNKFRHYHLSTRVEWNVVLSERARAQAESIALDLTDRREMLGENVFTMVSPYSMPRRSFCDEAVQDWYSEARRFNYDYNINNKFSPRTKHFTQVVWNSTTDIGCGQVALTEGPTYKVIVVCQYYPPGNARGQFKSNVSPAKARR…	3.12875	1.07444	320.834	119.975	1995.65	759.947	5082.07	2246.35	5236.6	2071.16	1617.17	1418.87	1042.29
OFUSG16269.1	263.177	6.29453	0.595451	10.402	2.42814e-25	1.63765e-23	FMRFAMIDE RECEPTOR-RELATED	FMAR_DROME^FMAR_DROME^Q:397-1311,H:122-405^30.323%ID^E:9.27e-26^RecName: Full=FMRFamide receptor {ECO:0000303|PubMed:12218185};^Eukaryota; Metazoa; Ecdysozoa; Arthropoda; Hexapoda; Insecta; Pterygota; Neoptera; Holometabola; Diptera; Brachycera; Muscomorpha; Ephydroidea; Drosophilidae; Drosophila; Sophophora	FMAR_DROME^FMAR_DROME^Q:397-1311,H:122-405^30.323%ID^E:9.27e-26^RecName: Full=FMRFamide receptor {ECO:0000303|PubMed:12218185};^Eukaryota; Metazoa; Ecdysozoa; Arthropoda; Hexapoda; Insecta; Pterygota; Neoptera; Holometabola; Diptera; Brachycera; Muscomorpha; Ephydroidea; Drosophilidae; Drosophila; Sophophora	PF00001.22^7tm_1^7 transmembrane receptor (rhodopsin family)^64-345^E:7.2e-22	.	.	KEGG:dme:Dmel_CG2114	PTHR46641	GO:0016021^cellular_component^integral component of membrane`GO:0005887^cellular_component^integral component of plasma membrane`GO:0004930^molecular_function^G protein-coupled receptor activity`GO:0008188^molecular_function^neuropeptide receptor activity`GO:0001653^molecular_function^peptide receptor activity`GO:0008344^biological_process^adult locomotory behavior`GO:0002209^biological_process^b…	GO:0016021^cellular_component^integral component of membrane`GO:0005887^cellular_component^integral component of plasma membrane`GO:0004930^molecular_function^G protein-coupled receptor activity`GO:0008188^molecular_function^neuropeptide receptor activity`GO:0001653^molecular_function^peptide receptor activity`GO:0008344^biological_process^adult locomotory behavior`GO:0002209^biological_process^b…	GO:0004930^molecular_function^G protein-coupled receptor activity`GO:0007186^biological_process^G protein-coupled receptor signaling pathway`GO:0016021^cellular_component^integral component of membrane	TTCGGATGTTCGGATGCAACTAAATCGAAGGTTGATGAATTATTAAAAAATGGAAAATCCTGAATCTTGAAATGGCAGACATTGATCAAGTACAATGGGGCGACTATAGCTAGGAACAGCACATGACGACAAACGTTTATGTCATTACTTTTATAGTACAACGCCCAAAGAAAGACTGATTAAGGATTTAATGAACGAATCGAAGAATCAACGGAATTAAACATCGAATTGGATACTACAATGGGGGTCTCGTATTTCGACAGTATTAATTCTACAGCGGCATACAATAGCACTGGATTCGATGGAATTAACAGTACGATTGAGTCGGATGAATGCCCCGATGAAGATAATTACCAAACGTTTTATCTTACATTTAGAGTAACAGTAGATGTTTTTATT…	MGVSYFDSINSTAAYNSTGFDGINSTIESDECPDEDNYQTFYLTFRVTVDVFIVGSLCLFGILGNIISMVVIKSGKITSAKTTRFLLQGLSISDSSYLIMAFISSTMRGIMKYTDWGDPFHGRYPYMYRYIWALSAIARLLAVNFVVLVTIERYIATCHPLNVKRWCTLKRVRIVAAITVLVSMLFNVPRFFDAIPVEYDNCTKMLDVGGYAEYLELNGMFYSMAYITVLYYTANVIIPITLLLILNAKIIITLKRAFRGVEALGSSFNHRAAEKTQAKEKGTTMMLCVVVIVFIVCQTPSFAISMVYTLYAFGVNMPDRNMMRYWYSIGTTLNVLNSATNFGIYFVFSKQFRQVLMGYLSCIKCISCNRGKYTCSSKKFEKSQQSTQSTSSSVERYLS…	8.34521	6.44369	482.377	763.559	604.182	514.381	895.569	680.01	596.964	383.055	1090.47	639.213	416.608
OFUSG02735.1	10199.6	6.28387	0.651158	9.56133	1.16253e-21	5.69232e-20	SLOW MYOSIN HEAVY CHAIN 1	MYSP_MYTGA^MYSP_MYTGA^Q:220-2661,H:22-835^55.528%ID^E:0^RecName: Full=Paramyosin;^Eukaryota; Metazoa; Spiralia; Lophotrochozoa; Mollusca; Bivalvia; Pteriomorphia; Mytiloida; Mytiloidea; Mytilidae; Mytilinae; Mytilus	MYSP_MYTGA^MYSP_MYTGA^Q:220-2661,H:22-835^55.528%ID^E:0^RecName: Full=Paramyosin;^Eukaryota; Metazoa; Spiralia; Lophotrochozoa; Mollusca; Bivalvia; Pteriomorphia; Mytiloida; Mytiloidea; Mytilidae; Mytilinae; Mytilus	PF01576.20^Myosin_tail_1^Myosin tail^42-842^E:1e-76	.	.	.	PTHR22988:SF70	GO:0030016^cellular_component^myofibril`GO:0016459^cellular_component^myosin complex`GO:0032982^cellular_component^myosin filament`GO:0003774^molecular_function^motor activity	GO:0030016^cellular_component^myofibril`GO:0016459^cellular_component^myosin complex`GO:0032982^cellular_component^myosin filament`GO:0003774^molecular_function^motor activity	GO:0003774^molecular_function^motor activity`GO:0016459^cellular_component^myosin complex	GAAGAATTCATCCAGGGTTAACAACATCGTTCAGTCTGCCAGCCGAAAGAAGGAAAGTTCGGGCCACGTTTCGACATCGCGGATTTTACATTTTATTTAATAGGACTGTGATTCCTAGGACATTTATCTCTCAAAATGAGTAGCTCAAGTTCCAGGATCGAGAGGACTACGATCATCAGCTCGGATGATGGAACCAGTAGCACAAAATCTGTCAACCGCTACAATGTCTACCGAGGCATGTCACCTACCTCGGAGACCCGTCTTCAGGCCAGAATCCGTGAATTAGAAGATGCGTTGGATGCTGAAAGAGAAGCACGTATCAGGGCAGAGAAAAATTACACAGAAGTCACCTTCCACTTGGAGACACTCGAGTCTCGCCTCGAGGAGGTCGATGGTCTC…	MSSSSSRIERTTIISSDDGTSSTKSVNRYNVYRGMSPTSETRLQARIRELEDALDAEREARIRAEKNYTEVTFHLETLESRLEEVDGLQTAQAEVNRKRDAELIKIRKDYELISVQSEQNEASLRKRHNDAVIELNDQLELISKSKSKTEKEKHSLLLEIDGLSSQLDGALKAKQSAESKLDGLEAALARLKAQVDDLTRQNNDLSNSKARLTQENFELQRQLQDLDSSVAQLSKLKLTLTSQLEDTKRSLDEEVRTRNNLQIQLAGLQNDFDNLAGKYEDESEANSQLRAQNSKLQSDLGSLKSRYDKDLLAKTEEFEELRRRLTSRITELESENDALRTKNSSLEKTKNKLSIEVRELTVELDGANAAVQDLAGRLKTAERNNAELQKRNDDLQSEL…	7.30742	15.0129	840.468	1160.46	7801.39	8517.28	19815.8	22342	26807.6	30244.9	26243.1	18452.1	112769
OFUSG10690.1	1144.34	6.2778	0.746197	8.34012	7.42133e-17	2.30332e-15	ZINC FINGER PROTEIN ELBOW-RELATED	NOC_DROME^NOC_DROME^Q:297-467,H:16-68^61.404%ID^E:1.01e-10^RecName: Full=Zinc finger protein Noc;^Eukaryota; Metazoa; Ecdysozoa; Arthropoda; Hexapoda; Insecta; Pterygota; Neoptera; Holometabola; Diptera; Brachycera; Muscomorpha; Ephydroidea; Drosophilidae; Drosophila; Sophophora`NOC_DROME^NOC_DROME^Q:1398-1790,H:402-535^37.778%ID^E:1.19e-09^RecName: Full=Zinc finger protein Noc;^Eukaryota; Metazo…	NOC_DROME^NOC_DROME^Q:297-467,H:16-68^61.404%ID^E:1.01e-10^RecName: Full=Zinc finger protein Noc;^Eukaryota; Metazoa; Ecdysozoa; Arthropoda; Hexapoda; Insecta; Pterygota; Neoptera; Holometabola; Diptera; Brachycera; Muscomorpha; Ephydroidea; Drosophilidae; Drosophila; Sophophora`NOC_DROME^NOC_DROME^Q:1398-1790,H:402-535^37.778%ID^E:1.19e-09^RecName: Full=Zinc finger protein Noc;^Eukaryota; Metazo…	PF00096.27^zf-C2H2^Zinc finger, C2H2 type^374-402^E:0.00063	.	.	KEGG:dme:Dmel_CG4491	PTHR12522:SF4	GO:0005634^cellular_component^nucleus`GO:0003677^molecular_function^DNA binding`GO:0046872^molecular_function^metal ion binding`GO:0070491^molecular_function^repressing transcription factor binding`GO:0007420^biological_process^brain development`GO:0001752^biological_process^compound eye photoreceptor fate commitment`GO:0035214^biological_process^eye-antennal disc development`GO:0035218^biologica…	GO:0005634^cellular_component^nucleus`GO:0003677^molecular_function^DNA binding`GO:0046872^molecular_function^metal ion binding`GO:0070491^molecular_function^repressing transcription factor binding`GO:0007420^biological_process^brain development`GO:0001752^biological_process^compound eye photoreceptor fate commitment`GO:0035214^biological_process^eye-antennal disc development`GO:0035218^biologica…	GO:0003676^molecular_function^nucleic acid binding	TCGGCGCATTGCTTTCATCTCTACCATACACAAGTGTTATTGGCACAATTTATGTTGTGTGTTTGAAGCATAAGAACGACATGATACATTACTGAGGCACATTGACTCGGGAAGCTACACAGAATCGACCTACGTCTTTTGAACATAAAAGTAACACAAGAATTCAGTATTCTCGTACAAAAGCGCAATTGGAAGAATTAGGAGTAATTGTAAAGGACGATACAAAAAGAGAAAGTTTAAAATTGTTTGAATATTCTTATTAGGATTTAGAAATCAAGATGTTGACATCGTCGGCATCTCAGTACTTACACCCGGACTATCTACAACCCCTACCAACAACGTTGGATGCTAAGAAAAGTCCCCTAGCGTTGTTGGCTCAAACATGCAGCAGTATAGGGA…	MLTSSASQYLHPDYLQPLPTTLDAKKSPLALLAQTCSSIGKDSPSSKNIIPPLEKKDRKSSSPEAKNDDKRSSSADRKSPKSPKPGFRSIPPKDIPPLVPISRSSSSSPASTSDKHPSSESTSTTSVIHHPVTVPAPTSGHHSNSSISLSCGSMRLEVNHHEAASSSGASKSSTSESSSSHSAHSGTPLKPSTHPYPGSVPSLYSHPYGHKSALEAAAAAYQGLPSAHGLGLPKFAPGAHPQTAGLSPYVAYASVKTATGATTLVPICRDPYCTNCQVTMQNAQLTPSAACGAGCTQCNHEKSVSGLPSVSSSNLGLGLPSASSMSLPVLPLGAGAYSLAGAASLAGSSLPGLYPHNLSLLAAHGHPPMPSGGYVCNWMAGAEYCGKRFGTSEELLQHL…	14.6115	10.7284	1074.99	1376.48	1487.2	2111.38	1946.03	2165.6	1719.42	1620.65	5534.34	5172.51	6526.57
OFUSG16129.1	469.369	6.27159	0.816673	7.63522	2.25434e-14	5.21434e-13	AGAP000266-PA	.	.	PF03067.16^LPMO_10^Lytic polysaccharide mono-oxygenase, cellulose-degrading^21-213^E:1.3e-31	sigP:1^20^0.712^YES	.	.	PTHR21113:SF6	.	.	.	ATTCACATGCTCACTTTGCTATAGCTATTGCTGCATGTTATACAATATAGAATGTGGAAACAGTTTTAAGAATGATCAAATTAAGGAATTCTTAAAAAAATAATTGAGCAAAATGTTCATTGTCAAGATGGAGATAAACATTGAATTAATATGTAAAGTTTAACTAAATATTACTTGTGTATTAAACAATATGGCGCCATGGATCGGATTCACAGTCTTCTTTGCGACCTGTTTAGAGTTAGTGTTTGGACACGGACGACTTATAGAACCCCCATCACGTTCTTCTATGTGGAAATATGGGTTCCCAAATCCGGAAAATTATGACGACAATGCGCTGTATTGTGGTGGAAAAGCTCATCAATGGGATGTATTAGGAGGTCTTTGTGGACTATGTGGTGA…	MAPWIGFTVFFATCLELVFGHGRLIEPPSRSSMWKYGFPNPENYDDNALYCGGKAHQWDVLGGLCGLCGDAFEGPRENEAGGKYANGIITRTYQPGARINVTIDMSANHKGWMEFKICPNNNPYKPITQKCLNAHPLNVISGPDGRTRPGHRFEIMQEWSNIQLLVQLPRNLRCSQCVLQWKYHSGNSWGQDADGTECIGCGGQEEFYGCSDVAIGAKPIEPIPIEKRGGPGKTYPIPKKLRTLPQPSVQVASPVNAPEPPPSRQQSALVKPPPYLGDVIRNAQRKANQERRNDMSEMKRKIGDNIRPQGMPFAKPKLPNAPISKPKLPQALLGNHQANGHRGQRVNPAPSSQKLPQMMDRKRITPLRKTVLPQQKIVSRRRNQFNRGKEQIGLSPKPD…	9.3827	11.8278	1184.18	761.753	2136.98	1350.6	1887.23	1813.74	1329.45	1442.77	292.717	353.832	50.3263
OFUSG05499.1	410.901	6.26158	0.579582	10.6742	1.34416e-26	9.8211e-25	FAMILY NOT NAMED	M130_STRPU^M130_STRPU^Q:891-2009,H:375-737^29.923%ID^E:2.24e-37^RecName: Full=Mesenchyme-specific cell surface glycoprotein;^Eukaryota; Metazoa; Echinodermata; Eleutherozoa; Echinozoa; Echinoidea; Euechinoidea; Echinacea; Echinoida; Strongylocentrotidae; Strongylocentrotus	M130_STRPU^M130_STRPU^Q:891-2009,H:375-737^29.923%ID^E:2.24e-37^RecName: Full=Mesenchyme-specific cell surface glycoprotein;^Eukaryota; Metazoa; Echinodermata; Eleutherozoa; Echinozoa; Echinoidea; Euechinoidea; Echinacea; Echinoida; Strongylocentrotidae; Strongylocentrotus	.	sigP:1^21^0.743^YES	.	.	PTHR46928	GO:0031225^cellular_component^anchored component of membrane`GO:0005886^cellular_component^plasma membrane	GO:0031225^cellular_component^anchored component of membrane`GO:0005886^cellular_component^plasma membrane	.	GGTGGAAACGTCAAAGCCTTTTGGTCAACATAAAGTAGCTTTAAACCTACTTACCGATACATATTTATACAACAAACCATAATGATTCAAGCATTGAGGATAGTGTTCTTTCCGTAGTTAACTCACGTGTAGGGTGTTGAACAGTACGACAAAAGAGTTAGAAGGCTGAGGGACAAAAAGGAGTTTCATAGACCGTTAACAATCTTACATTGAGACCAAGGTGTGAAATAAATCAGCATATATAATCACAAAACTGGATATATATATCTACACGTATTTTCAAAATGTTATGGTTAAGTTTATATTATGTGATAGGCATTAGTCTATATTGGGCACCAGTAGATGGCGCTGTGACACTTGAGCAAATTTCCACGGTATATTTACCATTTCTCATGGATG…	MLWLSLYYVIGISLYWAPVDGAVTLEQISTVYLPFLMDDSWGNSYDMLWDAVERSTFDTDNGLVYTVGATGILHVIDARNITNFTVLASYKFHPQWDGSEAKDVELCSGGVVAVPYQIKNALEDGGKVAIFAPYSREQATLVKIREINVGTFPSQIVFTEDCRKAVVVNQGNLGQSINSNPYYDAEGSISILEFSGGDIAYGSVTATTLGFTEFNERYESYKQSGVRYLYRGLPQTSFKSSFSQDVEPKSVVLNTDETVAYVTLQENNAIVRVDLLTDSIIDIYGLGSKSWLGTGFDSSSNDGGINIRPWNISAWYQPDGIQYFKGSDPDHEGYLVTANEGMHKVYRVDEEGITWSENWEGKTFPSENLVDKERVPTKVSDGLNSYRSLGGLQFSKVEG…	10.4369	8.5826	775.56	826.926	2018.78	1606.55	782.536	1385.31	444.12	522.609	868.448	483.058	1324.55
OFUSG24591.1	247.653	6.25928	1.1044	4.54002	5.62493e-06	4.01472e-05	CARBOXYLIC ESTER HYDROLASE	CHLE_RABIT^CHLE_RABIT^Q:55-882,H:9-279^43.554%ID^E:1.81e-64^RecName: Full=Cholinesterase;^Eukaryota; Metazoa; Chordata; Craniata; Vertebrata; Euteleostomi; Mammalia; Eutheria; Euarchontoglires; Glires; Lagomorpha; Leporidae; Oryctolagus	CHLE_RABIT^CHLE_RABIT^Q:55-882,H:9-279^43.554%ID^E:1.81e-64^RecName: Full=Cholinesterase;^Eukaryota; Metazoa; Chordata; Craniata; Vertebrata; Euteleostomi; Mammalia; Eutheria; Euarchontoglires; Glires; Lagomorpha; Leporidae; Oryctolagus	PF00135.29^COesterase^Carboxylesterase family^21-298^E:3e-101`PF07859.14^Abhydrolase_3^alpha/beta hydrolase fold^135-240^E:6e-08	sigP:1^17^0.752^YES	.	.	PTHR43918:SF4	GO:0005576^cellular_component^extracellular region`GO:0003990^molecular_function^acetylcholinesterase activity`GO:0004104^molecular_function^cholinesterase activity	GO:0005576^cellular_component^extracellular region`GO:0003990^molecular_function^acetylcholinesterase activity`GO:0004104^molecular_function^cholinesterase activity	GO:0016787^molecular_function^hydrolase activity	ATGTTGCTTGTACTGGGGATGATTCTAGTACAGTTTATGGGTGTCAGGACTCAAGAGGAGTCACTCATTACTATCCCAGCTGGACCAATTAGAGGAACTTTGAACTCACTTGAAGAATTCAAATATATACCGCAATTTCAAGGCAAAGATCTGGAGTTCAGGACGTATCTCGGAATCCCATATGCCGATCCTCCCGTTGGGGATCTGAGATTCCGACCTCCACGAGCGTTGACGACAACATGGAATGAGACAAGGAACGCAACAGAGTATGGCAAAGTCTGCATTCAGAATCCTTTTATATACCAGTCACAAGGGGGCTCTGTTGACAACATGTCAGAGGACTGTTTGACCTTGAACATATGGGCACCAGGGAATGGGTCAGACTCGCAACCAAAGGCT…	MLLVLGMILVQFMGVRTQEESLITIPAGPIRGTLNSLEEFKYIPQFQGKDLEFRTYLGIPYADPPVGDLRFRPPRALTTTWNETRNATEYGKVCIQNPFIYQSQGGSVDNMSEDCLTLNIWAPGNGSDSQPKAVMVWIHGGGFQFGGTDKTYDGTALGVMGDVIFVSMNYRLNVFGFLSTGNSVVPGNMGLLDQKLALHWVKENIARFGGDPERITIFGESAGATAVTIQAFSPQNKGLFQRVIAQSGSLLASWVFNMEDTVPSIKSMGQQLGCSNDSMVNLVECLRGLDATELYAACKIIY	0	1.08378	43.7455	143.305	262.865	268.933	289.943	781.494	1069.42	1019.95	1098.36	1067.82	608.29
OFUSG05364.1	461.515	6.24416	1.08126	4.5923	4.38383e-06	3.19307e-05	FORK HEAD DOMAIN TRANSCRIPTION FACTOR SLP1-RELATED	FOXL1_MOUSE^FOXL1_MOUSE^Q:390-677,H:43-138^79.167%ID^E:4.58e-51^RecName: Full=Forkhead box protein L1;^Eukaryota; Metazoa; Chordata; Craniata; Vertebrata; Euteleostomi; Mammalia; Eutheria; Euarchontoglires; Glires; Rodentia; Myomorpha; Muroidea; Muridae; Murinae; Mus; Mus	FOXL1_MOUSE^FOXL1_MOUSE^Q:390-677,H:43-138^79.167%ID^E:4.58e-51^RecName: Full=Forkhead box protein L1;^Eukaryota; Metazoa; Chordata; Craniata; Vertebrata; Euteleostomi; Mammalia; Eutheria; Euarchontoglires; Glires; Rodentia; Myomorpha; Muroidea; Muridae; Murinae; Mus; Mus	PF00250.19^Forkhead^Forkhead domain^60-145^E:2.5e-41	.	.	KEGG:mmu:14241`KO:K09405	PTHR11829:SF366	GO:0005634^cellular_component^nucleus`GO:0003677^molecular_function^DNA binding`GO:0003700^molecular_function^DNA-binding transcription factor activity`GO:0000981^molecular_function^DNA-binding transcription factor activity, RNA polymerase II-specific`GO:0043565^molecular_function^sequence-specific DNA binding`GO:0009653^biological_process^anatomical structure morphogenesis`GO:0030154^biological_…	GO:0005634^cellular_component^nucleus`GO:0003677^molecular_function^DNA binding`GO:0003700^molecular_function^DNA-binding transcription factor activity`GO:0000981^molecular_function^DNA-binding transcription factor activity, RNA polymerase II-specific`GO:0043565^molecular_function^sequence-specific DNA binding`GO:0009653^biological_process^anatomical structure morphogenesis`GO:0030154^biological_…	GO:0003700^molecular_function^DNA-binding transcription factor activity`GO:0043565^molecular_function^sequence-specific DNA binding`GO:0006355^biological_process^regulation of transcription, DNA-templated	CAACATTTGGTTCTATGCGTTTATTTTCCCATTATAATATTAAACTTTGGTCACAAAAACAACAACTTCTTATGGCAAGAATAACACAGAAACTCAGCGGAGATCTACAAAGAGAGGTATAAAGCCTATCGTGCAAGACGAGATACCAGACGATATCCATTATTGCTGGAGTCAACATCAAGGTTTAACAACAAAATACGGAAGTTACGGACAGTTTTTCTGAGACTATGGCTCATCAATTGACACCAGGGAACTCACTTGCAGCTCTCTATGCTAAATATGCCACGGAAACGAATCGGTATCAGCCGTACGGAGGGGCAGCTAGCATGTACTACCCACACGCTGATTACAGTCGAGCGTACGCGCTTTCGATGCTCGCTGACTTCGAAAGACGTGAAC…	MAHQLTPGNSLAALYAKYATETNRYQPYGGAASMYYPHADYSRAYALSMLADFERREQPQKPPYSYIALIAMAIKNSPERKLTLNGIYQFIMERFPYYHDNKQGWQNSIRHNLSLNDCFMKVAREKGKPGKGNYWTLDPNCDEMFDNGNYRRRKRRQKMQVMKTSQDSNAMQKGGFEKCTPHDEEYPDDVSGISDDIGDSESDTDATQNDTDNISQTSDIRMKAEPINITKAGKNIVVSESCVEQRVKTPHLTISTPSTAPSILPSASSTTTSMPTPEVSPSPPKRKLFTIDSLIGNVKNSSEQTSSDSAKSPSVYDKIPSPPPKVIDLSKRGISQPYPYGGYPMYAYPTPNGVFAGSVSAIRSGVPHANSHYLEAMGLSHLGISPLASLAAVQGPYAP…	0	1.07406	35.4798	131.437	1618.24	1342.05	1803.91	1663.24	1911.62	1712.59	913.705	706.403	620.115
OFUSG04421.1	981.611	6.23924	0.925613	6.55701	5.48979e-11	8.55231e-10	DEGENERIN-LIKE PROTEIN UNC-105	UNC8_CAEEL^UNC8_CAEEL^Q:1124-2140,H:405-722^30.233%ID^E:1.56e-30^RecName: Full=Degenerin unc-8;^Eukaryota; Metazoa; Ecdysozoa; Nematoda; Chromadorea; Rhabditida; Rhabditina; Rhabditomorpha; Rhabditoidea; Rhabditidae; Peloderinae; Caenorhabditis	UNC8_CAEEL^UNC8_CAEEL^Q:1124-2140,H:405-722^30.233%ID^E:1.56e-30^RecName: Full=Degenerin unc-8;^Eukaryota; Metazoa; Ecdysozoa; Nematoda; Chromadorea; Rhabditida; Rhabditina; Rhabditomorpha; Rhabditoidea; Rhabditidae; Peloderinae; Caenorhabditis	PF00858.25^ASC^Amiloride-sensitive sodium channel^35-645^E:7.7e-89	.	.	.	PTHR11690:SF248	GO:0016021^cellular_component^integral component of membrane`GO:0043025^cellular_component^neuronal cell body`GO:0005886^cellular_component^plasma membrane`GO:0005261^molecular_function^cation channel activity`GO:0005272^molecular_function^sodium channel activity`GO:0006812^biological_process^cation transport`GO:0040011^biological_process^locomotion	GO:0016021^cellular_component^integral component of membrane`GO:0043025^cellular_component^neuronal cell body`GO:0005886^cellular_component^plasma membrane`GO:0005261^molecular_function^cation channel activity`GO:0005272^molecular_function^sodium channel activity`GO:0006812^biological_process^cation transport`GO:0040011^biological_process^locomotion	GO:0005272^molecular_function^sodium channel activity`GO:0006814^biological_process^sodium ion transport`GO:0016020^cellular_component^membrane	CTTTGCAACAATATTTACAACAATGTAACATGTAGGAGCAATGACAATTTCCATAAGGCAAGCTTTTTAATCTGTAATAATGTTGATATAATTTCCATATATAATatatattgagggagaagatgaacacatattcgaaaccatagaatggaatatttggtTTGTATTACGTAACATCGACAAAATGAATGAGAAAGATGATCTAGATAATATGACGGTGATTGATACAAAAGAAGAGGAAATAAAAGGAGCTTCTGATGCCAAAACTGTTACTGATGAATTCATGGGGAGCTTTGGGGCGCATGGCCTTCCACGTGTTTGGTCCTCAGCCAGCCCCGTGAAGAAAATAGTATGGTTAGTCCTGTTCCTGGCAGCCAGTGGTTACTGCCTCAATATCAT…	MNEKDDLDNMTVIDTKEEEIKGASDAKTVTDEFMGSFGAHGLPRVWSSASPVKKIVWLVLFLAASGYCLNIIIRVGIKFGTFPSGINSKVYPRSIVDFPAVTICNLNMLKATSISNNNVEKYINLLSVQSEAEASMNSWITWALNYTDSVTTSFGPTTDSTSRTNSSNAGTTDHTTVADRRKRAVEEFPFNEDLLEDELLLNLRADHVNDLTRLIHMPEVVKMATLRLLKKRHGFDMREQRSAPPIPHRQKRDNQAAETNSSDYYDDNFYYYDNYDYSYYDDYGFGDVSENDFRTLLTKSKTDDYQDLMGVLKPTKTELELYGHSAQDMIVSCTFDSKKCNYTLFKTFQNSYYGNCFTFNYDDGNSTTQEVVFNTTKKGSRFGLKLTLNIERQEYIGLF…	5.21705	5.36704	1063.67	275.34	2870.23	1233	3518.13	2969.75	3490.32	3882.67	4275.25	2557.38	274.426
OFUSG21385.2	264.916	6.23421	0.700625	8.59892	8.04694e-18	2.77704e-16	ADIPOLIN	ADIPL_DANRE^ADIPL_DANRE^Q:733-1704,H:5-318^43.844%ID^E:7.08e-57^RecName: Full=Adipolin;^Eukaryota; Metazoa; Chordata; Craniata; Vertebrata; Euteleostomi; Actinopterygii; Neopterygii; Teleostei; Ostariophysi; Cypriniformes; Cyprinidae; Danio	ADIPL_DANRE^ADIPL_DANRE^Q:733-1704,H:5-318^43.844%ID^E:7.08e-57^RecName: Full=Adipolin;^Eukaryota; Metazoa; Chordata; Craniata; Vertebrata; Euteleostomi; Actinopterygii; Neopterygii; Teleostei; Ostariophysi; Cypriniformes; Cyprinidae; Danio	PF00386.22^C1q^C1q domain^198-326^E:5.1e-06	sigP:1^27^0.84^YES	.	KEGG:dre:790933`KO:K21410	PTHR24019:SF12	GO:0005576^cellular_component^extracellular region`GO:0005615^cellular_component^extracellular space`GO:0005179^molecular_function^hormone activity`GO:0007275^biological_process^multicellular organism development`GO:0046324^biological_process^regulation of glucose import`GO:0016055^biological_process^Wnt signaling pathway	GO:0005576^cellular_component^extracellular region`GO:0005615^cellular_component^extracellular space`GO:0005179^molecular_function^hormone activity`GO:0007275^biological_process^multicellular organism development`GO:0046324^biological_process^regulation of glucose import`GO:0016055^biological_process^Wnt signaling pathway	.	CATAAATTGCCACGATTAAAATTTGGCAAAAATATCGTTGTTTGTTGCTAATTATTTAGATGGCACTGTGTATAGACAGTGCATCAGCTGGGGTTTCAAGTGGATTGTAATTGATAGATGATGCGTTTTGGAAGATTTTTGACACCGTTTGGCCAATTATTCATCTGGCTCTTTCCGTCTAGTTGTCAGTGGTTAAGGTGGACCAGCTGAGTTGGCGCTGTTAGCAAATTGTTCCTGGTTGATGATGCCGGTGCTACAACGCGCCCTCAGACGCTACTTAGCACTAACCCGCACAGTTGAATCAGCAGTTTCCTCTCGTTCGTGTGAGTGTCTTTCAAAACACTGTCGTCTTTGATTTGTGAACAACAGATAAAGGGAAGTTTCAAATAAAACTGATCA…	MMRHILAYLTLVLWLFLMECGSGYARAQKRLNSYTTNEGDELSNLSTNEAPQVFRPGVIDPQRSWKRFITHDRINSRKSKPNKNKIIHERSNTILSIGPRGPPGPPGPPGPPGAEITKEVMMREFKEMVRDAAERRAERLLAERCPGCAKKINGTYYIPLVGSEEFTMVPKIAAAFHCKLRGNVVVSKKTFLELQNFQVPFGGGAFQRGDVFNTKEGRFSATGEGIYQFTVNIHITQDFSQKRRRSYKSLKKRDNIRVLICIESLCQKHTSLEFISGLESNSRVFTISVSGLLHLEAGQYTSVYIDNSSSYQVTVQSGSTFTGLLVGV	8.34429	0	373.85	319.214	361.984	319.639	633.618	694.759	729.051	665.211	1074.38	621.793	1283.67
OFUSG00249.1	189.639	6.23069	0.981956	5.59522	2.20339e-08	2.37315e-07	EG:EG0003.4 PROTEIN-RELATED	UD19_MOUSE^UD19_MOUSE^Q:478-1803,H:33-483^29.957%ID^E:1.24e-59^RecName: Full=UDP-glucuronosyltransferase 1A9 {ECO:0000305};^Eukaryota; Metazoa; Chordata; Craniata; Vertebrata; Euteleostomi; Mammalia; Eutheria; Euarchontoglires; Glires; Rodentia; Myomorpha; Muroidea; Muridae; Murinae; Mus; Mus	UD19_MOUSE^UD19_MOUSE^Q:478-1803,H:33-483^29.957%ID^E:1.24e-59^RecName: Full=UDP-glucuronosyltransferase 1A9 {ECO:0000305};^Eukaryota; Metazoa; Chordata; Craniata; Vertebrata; Euteleostomi; Mammalia; Eutheria; Euarchontoglires; Glires; Rodentia; Myomorpha; Muroidea; Muridae; Murinae; Mus; Mus	PF00201.19^UDPGT^UDP-glucoronosyl and UDP-glucosyl transferase^106-505^E:2.6e-78`PF04101.17^Glyco_tran_28_C^Glycosyltransferase family 28 C-terminal domain^337-431^E:6.5e-08	.	.	KEGG:mmu:394434`KO:K00699	PTHR48043:SF10	GO:0005783^cellular_component^endoplasmic reticulum`GO:0005789^cellular_component^endoplasmic reticulum membrane`GO:0016021^cellular_component^integral component of membrane`GO:0016020^cellular_component^membrane`GO:0008144^molecular_function^drug binding`GO:0019899^molecular_function^enzyme binding`GO:0004857^molecular_function^enzyme inhibitor activity`GO:0005504^molecular_function^fatty acid b…	GO:0005783^cellular_component^endoplasmic reticulum`GO:0005789^cellular_component^endoplasmic reticulum membrane`GO:0016021^cellular_component^integral component of membrane`GO:0016020^cellular_component^membrane`GO:0008144^molecular_function^drug binding`GO:0019899^molecular_function^enzyme binding`GO:0004857^molecular_function^enzyme inhibitor activity`GO:0005504^molecular_function^fatty acid b…	GO:0016758^molecular_function^transferase activity, transferring hexosyl groups	CCGGTTCGCATAATTTTAAATAAAGCACGAACGGTATATCTTACCAGTTGGAAAGATGAGACAATTTGAAAAATAAATAAATTTGATTTTTAAGAATTATATTTTGAAGATGCTACCTACAACAAAGTTATTGACTTAAGGTTTTCAAAAAGTTTTCATCTGGAATTAGCATTTTGACTCAAGATTCCTGATTCAACCAGTAGTCTATTCAGAGCATTACATTTGTTTTACTAACAATGGCGTCTGGACGCAACCCAACTGGGCATAACAACTGATAAAATCACAATACCACTTGCTGCTTCAAGAAGTTGATATTCAAAATGAACATTCATACTGAATGAGGCAAGATTCTCAACTAGAATGACACAGTTACCGACAATTATTTCAACGTTCGTTTCA…	MTQLPTIISTFVSILVSTSWIPIVCPSSIVVYPFCTYTLNSHFMVFGNLARTLLENGHDVTFILPDDIQLLSDTEYIPRDVVIMSFPTPKRYHVNLSPDHGDMSPWKFMDIGAKVQYRFCASLLRTKVLNQIKSRNFDLFLTDESAWCSRLVWDYLDIPTVVVSTWGPVRDTDLARPYMPSFVPNIQTSFTDKMTFIERVWHYIINMRMDVAINGILDDFDNLKRKFKLNATLSMRDSFKRVSLVICQGDISAEFPRPTMPNVVMLSPLGIFQNEVLSAEINDFVEGATFGIVVVSFGTRFNNVGIDKAEAMARIFSSLKLRVIWKYEGANLTNASDNVMRVPWIPQNALLKHSKTKLFITHCGVNSFNQAIYYGVPVIAVPLDLDQFSHASKLVNRKR…	1.04297	1.07432	117.166	135.619	1093.83	1196.01	485.954	860.632	283.681	544.221	209.354	107.789	36.1673
OFUSG06222.1	486.132	6.22909	0.997667	6.32574	2.5203e-10	3.59127e-09	ZINC FINGER PROTEIN PEGASUS	IKZF5_HUMAN^IKZF5_HUMAN^Q:1722-1874,H:366-416^52.941%ID^E:4.42e-13^RecName: Full=Zinc finger protein Pegasus;^Eukaryota; Metazoa; Chordata; Craniata; Vertebrata; Euteleostomi; Mammalia; Eutheria; Euarchontoglires; Primates; Haplorrhini; Catarrhini; Hominidae; Homo	IKZF5_HUMAN^IKZF5_HUMAN^Q:1722-1874,H:366-416^52.941%ID^E:4.42e-13^RecName: Full=Zinc finger protein Pegasus;^Eukaryota; Metazoa; Chordata; Craniata; Vertebrata; Euteleostomi; Mammalia; Eutheria; Euarchontoglires; Primates; Haplorrhini; Catarrhini; Hominidae; Homo	.	.	.	KEGG:hsa:64376`KO:K09220	PTHR24404:SF55	GO:0005654^cellular_component^nucleoplasm`GO:0032991^cellular_component^protein-containing complex`GO:0003700^molecular_function^DNA-binding transcription factor activity`GO:0001227^molecular_function^DNA-binding transcription repressor activity, RNA polymerase II-specific`GO:0019904^molecular_function^protein domain specific binding`GO:0000977^molecular_function^RNA polymerase II transcription r…	GO:0005654^cellular_component^nucleoplasm`GO:0032991^cellular_component^protein-containing complex`GO:0003700^molecular_function^DNA-binding transcription factor activity`GO:0001227^molecular_function^DNA-binding transcription repressor activity, RNA polymerase II-specific`GO:0019904^molecular_function^protein domain specific binding`GO:0000977^molecular_function^RNA polymerase II transcription r…	.	TCTAAATAACCCTTGTACCTAAACATAATCTGAACAGCAACGTAGTATACTATAACAACAACTCCATTCATTTATAGACGTATGCGCTGACTGCACGACTTGGGAAATCTCACAATTGGAAATCGCTTATTAAATCGAGAAAACGAAATCTGTTGCTATAGTAACTGCATACGACGTGATTAACAAAGCCGATAATGGCGCATAAGAAGAAAGCAGCTGCCGTTGTGCTAAAAAGAAATGGGTCGACAGATAGCGCTGAAGTGTCGTTCATGCGGTCTCTACTGATGGGCACTGAGCCCCCAGCCGCACTCGTCCCAAAAAAGACTATTGTGCTGCACACAACCAAGGCTTCCACGATTGATTTACCAATCAAGGCAGACGCGCCTTATAACTGGAGAC…	MAHKKKAAAVVLKRNGSTDSAEVSFMRSLLMGTEPPAALVPKKTIVLHTTKASTIDLPIKADAPYNWRQRIKDRAAKQVSETGDCIEIKGDDLNRVSPTSRLAAVKHALKHEQMEVAQTRVTSIGILKCDRCPFSTILQDKFKEHMVNEHGGQVDELDKFLLSPKDLHQNAAIGNFNRHNLETVRNLAQRRTSMSPTEEYVNFREAIRRTGRYRFISECDPTKKTDACSSLVKDLLLNGKSRSGPKPAIFIKSEKVKREGQQTLDSNTTPSLGLNSWLFSPPNNGSRSPSVWSSASSPGHPWDPHRERTLSTGSNDIFGLNYNTPVIDDPMYKPNSPMYPITQTLDSHPRPLDLTYGLPMKREMLSPELDTSSENSGPIMRNKDPTLYSSSSMKSDDEL…	12.5169	24.7043	1984.73	1400.96	1464.02	1126.14	1300.55	1211.05	1410.57	867.795	590.087	622.536	840.569
OFUSG12487.1	94.7214	6.22236	1.30529	4.87966	1.06268e-06	8.63467e-06	BONUS, ISOFORM C-RELATED	TRIM1_MOUSE^TRIM1_MOUSE^Q:4-642,H:12-243^23.79%ID^E:6.83e-13^RecName: Full=Probable E3 ubiquitin-protein ligase MID2;^Eukaryota; Metazoa; Chordata; Craniata; Vertebrata; Euteleostomi; Mammalia; Eutheria; Euarchontoglires; Glires; Rodentia; Myomorpha; Muroidea; Muridae; Murinae; Mus; Mus	TRIM1_MOUSE^TRIM1_MOUSE^Q:4-642,H:12-243^23.79%ID^E:6.83e-13^RecName: Full=Probable E3 ubiquitin-protein ligase MID2;^Eukaryota; Metazoa; Chordata; Craniata; Vertebrata; Euteleostomi; Mammalia; Eutheria; Euarchontoglires; Glires; Rodentia; Myomorpha; Muroidea; Muridae; Murinae; Mus; Mus	PF13923.7^zf-C3HC4_2^Zinc finger, C3HC4 type (RING finger)^20-48^E:9.2e-08`PF13445.7^zf-RING_UBOX^RING-type zinc-finger^21-50^E:2.2e-08`PF00097.26^zf-C3HC4^Zinc finger, C3HC4 type (RING finger)^21-63^E:7.7e-08`PF00643.25^zf-B_box^B-box zinc finger^166-201^E:9.8e-09	.	.	KEGG:mmu:23947`KO:K10647	PTHR25462	GO:0005737^cellular_component^cytoplasm`GO:0005874^cellular_component^microtubule`GO:0019899^molecular_function^enzyme binding`GO:0042802^molecular_function^identical protein binding`GO:0008017^molecular_function^microtubule binding`GO:0051219^molecular_function^phosphoprotein binding`GO:0042803^molecular_function^protein homodimerization activity`GO:0016740^molecular_function^transferase activit…	GO:0005737^cellular_component^cytoplasm`GO:0005874^cellular_component^microtubule`GO:0019899^molecular_function^enzyme binding`GO:0042802^molecular_function^identical protein binding`GO:0008017^molecular_function^microtubule binding`GO:0051219^molecular_function^phosphoprotein binding`GO:0042803^molecular_function^protein homodimerization activity`GO:0016740^molecular_function^transferase activit…	GO:0046872^molecular_function^metal ion binding`GO:0008270^molecular_function^zinc ion binding	ATGGCGAATAGTGAAATGTTTGCAGCGCTGCTTCAGCGTTTGAAGGACGATTGTTTAAACTGTACCATATGTACTGATGATTTCAAAGATCCGATCATACTGCCTTGTCATCACAGTTTTTGCAGGAAATGTCTCGGAGACTCCGTAAGGGGGAAAATAATAAACAATAAATTCCAGTGCCAGGTCTGTGATAAACTGACGGAAATTCCCGTTGATGGCGTGCAAGGTTTCCCAGTCGATGAACGGGTCGCAAATATGCTGACCAAGATTGATGCTCTTTTAAAGGTAGTTCCGTGCAGTAGCTGCGACACTAAGGAGAACGCCAGATGGAACTGTAAAACATGTCGTCAAGCGTACTGTAACAGGTGCATAGAGTTGCATAAAAATATACAAGATGCA…	MANSEMFAALLQRLKDDCLNCTICTDDFKDPIILPCHHSFCRKCLGDSVRGKIINNKFQCQVCDKLTEIPVDGVQGFPVDERVANMLTKIDALLKVVPCSSCDTKENARWNCKTCRQAYCNRCIELHKNIQDAEKHQTELINAEDVGEADPEMTDSFYREARLTHYCPKHKKEELDLYCKDDNLVVCGKCIAVKHRDHEIIDAEDRATEIRNDISDVLKKGESNFKRPLVDYIDFIENTMVECRANHDETAISIHAYFQKIQAEIDAKKADCLQNLKNNYAYQVELLETISNDMSGRLGRYNNERRLLEILKSDTSDVQLIKMRDKLKDTFTAWESNDWQRPYKSITFQINVFANDKQTFEQYLDSVSLDVEDQNNDIAGVDNAAKVVVVIDQTGKEKM…	7.30016	0	350.501	440.264	175.808	501.693	104.82	173.93	180.601	154.514	276.765	72.9288	22.0446
OFUSG07352.1	1360	6.21797	0.831532	6.98692	2.80993e-12	5.20729e-11	TEKTIN 3	TEKT3_HUMAN^TEKT3_HUMAN^Q:120-1523,H:15-481^44.186%ID^E:3.83e-121^RecName: Full=Tektin-3;^Eukaryota; Metazoa; Chordata; Craniata; Vertebrata; Euteleostomi; Mammalia; Eutheria; Euarchontoglires; Primates; Haplorrhini; Catarrhini; Hominidae; Homo	TEKT3_HUMAN^TEKT3_HUMAN^Q:120-1523,H:15-481^44.186%ID^E:3.83e-121^RecName: Full=Tektin-3;^Eukaryota; Metazoa; Chordata; Craniata; Vertebrata; Euteleostomi; Mammalia; Eutheria; Euarchontoglires; Primates; Haplorrhini; Catarrhini; Hominidae; Homo	PF03148.15^Tektin^Tektin family^93-475^E:3e-134	.	.	KEGG:hsa:64518`KO:K18630	PTHR19960:SF11	GO:0002080^cellular_component^acrosomal membrane`GO:0070062^cellular_component^extracellular exosome`GO:0015630^cellular_component^microtubule cytoskeleton`GO:0005634^cellular_component^nucleus`GO:0002081^cellular_component^outer acrosomal membrane`GO:0036126^cellular_component^sperm flagellum`GO:0060271^biological_process^cilium assembly`GO:0060294^biological_process^cilium movement involved in …	GO:0002080^cellular_component^acrosomal membrane`GO:0070062^cellular_component^extracellular exosome`GO:0015630^cellular_component^microtubule cytoskeleton`GO:0005634^cellular_component^nucleus`GO:0002081^cellular_component^outer acrosomal membrane`GO:0036126^cellular_component^sperm flagellum`GO:0060271^biological_process^cilium assembly`GO:0060294^biological_process^cilium movement involved in …	.	CGCTAACTTGTAGTATTTATATAGCAAGTAAGAAGTACACTTAGGGAACAAGAAGGGTAAATTCGCCACGATTTTACTGAATTAAAGAGTGATTAGCGATGGCAGAAGTATCCTTTTCCCCGCGGCCAGCATCAGTAGGATCAGCCAGGGGTTCGCCAAGAGGAGGAAATATGGCAACCGCATATTACTCCGCATCACCAATGATGAGGCATCCAGGTGTGAGTCAGTCACCCAGGACACCCTCCTTCACGAATACTTACCCCATAGTGACGGACAAGACAATCTCTAGTCACATGAGCAAGAATCTGGGACACGCAAAGACATACTACAACCCTGCCAGAAATGTGCTGTATTCTCGATACACACAAAATGACTGGGCCAACTCTAACAGGGGTCACT…	MAEVSFSPRPASVGSARGSPRGGNMATAYYSASPMMRHPGVSQSPRTPSFTNTYPIVTDKTISSHMSKNLGHAKTYYNPARNVLYSRYTQNDWANSNRGHYNLSDRERAAAESIRADAWRTVKECDARTRNRQFSNTRKLGERTQDIAFWKQELHSEMDAMQNEIENLREHKRVLEKALMDSNNPLHIAEECCMHREKRQGIDLVNDDVERQLSREVGTIRKCQDRMKRLVEKASIQLKLDRAVLHDLDQDSKDKNHAQNLDDRMHGLRNTSAGVGYHPGIENVDHTITIPYSWVKYTQENIARSQKMRAASERLRGEIDACLRACANEMWSQFNSVNNSFNSRLQETSDARNKLQAHLQRTMQEIFDMERNIDILRKAIADKELPMKVAQTRLEERTR…	4.17044	0	281.07	129.387	2932.65	1832.18	3175.37	3831.61	6482.39	7802.77	3095.19	4853.05	2300.1
OFUSG24284.1	57.2316	6.20135	1.07747	5.37334	7.72915e-08	7.67363e-07	.	.	.	.	.	.	.	.	.	.	.	ATTTACAGTTGAATAATAATTTGATGTATTGAAAGAAACTTTTGGGATTTAGGATTATCTTAATATTGATCATTCATTTATTTCTGGATCAAAGACTAGCTAATCCAGAATATATGACCTACCGGGTTGGGAATATGACCATGAAGCAATGGAATTCTCCCATGCTAAACATTTAGATGACAGAATCaagaaaggaagaaagaaacacagaaTTGTTGACCCTAATGAAACAGACTATGAAGATGTCAATGATCTGGAGCAGCTAAGAGGTGGAGTATACAAGAGACCAGGGATCAGTAAGGTTGCAGCAGTACTTCAGAACCAACTCAGTGGCAAAGGAGGGAAGCCACCTAAGAAACACGAATACATGGAACCCAACGACACATTTGGTGCTGCAAC…	MEFSHAKHLDDRIKKGRKKHRIVDPNETDYEDVNDLEQLRGGVYKRPGISKVAAVLQNQLSGKGGKPPKKHEYMEPNDTFGAATNGNGYNNGESLYEPLRVARGETGKPNDPRVKPPDFNTPDPRSGAPLPPPNPPPMGRSNTDPRLAQLDAQMMAMNMNGGMPMNGHGMPMNG	2.06797	1.09313	239.205	128.986	213.874	198.146	99.0603	227.657	149.376	171.618	11.8637	28.1051	3.37551
OFUSG16543.1	371.758	6.18208	0.882324	6.01957	1.74879e-09	2.22824e-08	OS03G0724300 PROTEIN	.	.	.	.	.	.	PTHR27001:SF237	.	.	.	ATGTCTTCTACCAACGACGAATGGTTGACTGAGGTGATCGACGGGGGTCTGTCTCGACGAGAATGGATTCTAATTGGGTGCCTAGGGGGCGCTGTGTTTATATGTCTCATTGTGATTCTAGTGCTGCTAATAATTATGGCTAGGAGAAGACCTAGGAACAACAGACGTGTGCGGAGAGATTCATCTATTGCAGGGAGTTCTGATTATGGTCCACATGAGAAACATCTCCAGACTATATCTGCACCAACTTACGGCCATGAAGATTTCATAATTGATACAAAAGAGAATAGGCTTCGGAGGATCCCGTATAAAAAAGGTTACGACAGAGATACCCACGAATTTGATGAAAATATACATGCTTGGGATCATAAGGGAATGTATCCGGACAAACACCGGAAA…	MSSTNDEWLTEVIDGGLSRREWILIGCLGGAVFICLIVILVLLIIMARRRPRNNRRVRRDSSIAGSSDYGPHEKHLQTISAPTYGHEDFIIDTKENRLRRIPYKKGYDRDTHEFDENIHAWDHKGMYPDKHRKDRHQGDRHRDDRHHGDRHYEDNKHHGERNHRDREYHSNGHVNHVSNDYGLAHYPPQPSGGRYVERRYDDYVPRVHTQYY	2.08441	0	127.192	81.4078	410.523	301.671	694.359	377.184	339.318	281.92	1922.33	754.906	4744.58
OFUSG16723.1	394.264	6.1771	0.452366	13.4674	2.43396e-41	5.05849e-39	NG5	.	.	PF04505.13^CD225^Interferon-induced transmembrane protein^123-165^E:6.2e-13	.	.	.	PTHR14948	.	.	GO:0016021^cellular_component^integral component of membrane	ATTCCATTCATTGATATGTCTAAACCAGTTCCGCCGCCAGAATATTATCCTCCCCCTGGGCAACAACCAGGACAATATGCTCCCCCTGGGCAACAACCAGGACAATATCCTCCCCCTGGGCAACAACCAGGACAATATTCCCTCCCTGGGCAACAACCAGGACAATATCCTCCCCCTGGGCAACAATCAGGACAATATCCTCCCCCTGGGCAACAGGGAGGTGGCTACCCGAGCGCCAATTACGGACCACCACCCCAAGGGAATTATGGGCAGTATCAACCTTCATTGGATCCACAACACGTAGTCCTTAGCAGCCAACCACAACCTATGACCAACACCGTAGTGGTGCAGTCTCCAATGGTTCGGCCAAGCAGTTACTTGATCCTTGCTATTTTCACA…	IPFIDMSKPVPPPEYYPPPGQQPGQYAPPGQQPGQYPPPGQQPGQYSLPGQQPGQYPPPGQQSGQYPPPGQQGGGYPSANYGPPPQGNYGQYQPSLDPQHVVLSSQPQPMTNTVVVQSPMVRPSSYLILAIFTTICCNPIFGIVAIIFSVMSSSSADNGDLEEAVNIPAVLVSLAEMQVVASTKK	8.24329	10.9905	739.854	706.182	2225.52	1390.93	2038.44	1451.78	924.75	763.099	158.124	115.373	31.3962
OFUSG13450.1	906.508	6.17228	1.00915	6.02506	1.69048e-09	2.15983e-08	RICH REPEAT AND NACHT DOMAIN-CONTAINING PROTEIN, PUTATIVE-RELATED	LR74A_HUMAN^LR74A_HUMAN^Q:432-1694,H:66-483^33.097%ID^E:3.11e-56^RecName: Full=Leucine-rich repeat-containing protein 74A {ECO:0000312|HGNC:HGNC:23346};^Eukaryota; Metazoa; Chordata; Craniata; Vertebrata; Euteleostomi; Mammalia; Eutheria; Euarchontoglires; Primates; Haplorrhini; Catarrhini; Hominidae; Homo	LR74A_HUMAN^LR74A_HUMAN^Q:432-1694,H:66-483^33.097%ID^E:3.11e-56^RecName: Full=Leucine-rich repeat-containing protein 74A {ECO:0000312|HGNC:HGNC:23346};^Eukaryota; Metazoa; Chordata; Craniata; Vertebrata; Euteleostomi; Mammalia; Eutheria; Euarchontoglires; Primates; Haplorrhini; Catarrhini; Hominidae; Homo	PF13516.7^LRR_6^Leucine Rich repeat^140-155^E:5500`PF13516.7^LRR_6^Leucine Rich repeat^161-182^E:0.82`PF00560.34^LRR_1^Leucine Rich Repeat^163-178^E:48`PF13516.7^LRR_6^Leucine Rich repeat^189-208^E:0.021`PF00560.34^LRR_1^Leucine Rich Repeat^195-204^E:5000`PF13516.7^LRR_6^Leucine Rich repeat^217-236^E:3.1`PF00560.34^LRR_1^Leucine Rich Repeat^220-233^E:240`PF13516.7^LRR_6^Leucine Rich repeat^245-26…	.	.	KEGG:hsa:145497	PTHR24114:SF30	.	.	GO:0005515^molecular_function^protein binding`GO:0005509^molecular_function^calcium ion binding	GTTTGGGATTCTATATGACTTTAGTTATTCGTTGTTTCCTCACAACTGATTATTGTCTGCCATTGTGTGTTGATTAATGGGCATTGCCTTGAAAACATGACGAGATCTGAATAGAAGGCACAAGTTTGATAAACACAATTGTTAAATCGAACATGGAAGTGTCGAATCCGACACTTAAGGTGACTGGAAGCAAGAACACGAGCTTAGTGGGTTCTGTAAAATCACTCTATGGAAGCGATAAGGCAGGTGGCACTGGTACATTGGGGAATGGGGAAAAGGAATACATTGATGACTTCTTAGCGGAGAAAGACAGAAACAGCAAGGCGAGTTACTTAGACGTGAAGCCCTCCAAGAAGGGTACATCCAGCTCCACACGTTTTTCAAGAAGGTCGTTGACAG…	MEVSNPTLKVTGSKNTSLVGSVKSLYGSDKAGGTGTLGNGEKEYIDDFLAEKDRNSKASYLDVKPSKKGTSSSTRFSRRSLTAGQNREREADLDTVLDISEKAYRYDDTGKTAYDNACKRYNVVPASGVLKALPFEEEIDIKHYGMGPKGARAMAIPLVINNNITTLNLKNNCLEERGIEEIGRMMCENTTITDLDISENNIRTTGANVIASFLKFNVHLARLNISNNGFEDKDAEIMASAIEENARLKVLDLSHNNFAVQGGITFKSVIAENDVLEELDLSWNNIRTKGAVAICKGVKENIRLKRLNLAWNGFGDDGAEAMGVALTKNASLVELDLSCNRITCEGFLLLIQDFAQNDSLKVLKLGKNMIRDDSATTGLQLLRRIPNIALTTLDFSDII…	13.5634	5.36776	1588.46	487.08	4472.8	2546.45	3065.81	2060.15	2092.56	1460.56	2261.42	3964.9	332.867
OFUSG13440.1	565.994	6.17043	0.994383	6.23811	4.42878e-10	6.14532e-09	AT23443P	TC1D1_DANRE^TC1D1_DANRE^Q:365-769,H:37-173^36.691%ID^E:3.15e-26^RecName: Full=Tctex1 domain-containing protein 1;^Eukaryota; Metazoa; Chordata; Craniata; Vertebrata; Euteleostomi; Actinopterygii; Neopterygii; Teleostei; Ostariophysi; Cypriniformes; Cyprinidae; Danio	TC1D1_DANRE^TC1D1_DANRE^Q:365-769,H:37-173^36.691%ID^E:3.15e-26^RecName: Full=Tctex1 domain-containing protein 1;^Eukaryota; Metazoa; Chordata; Craniata; Vertebrata; Euteleostomi; Actinopterygii; Neopterygii; Teleostei; Ostariophysi; Cypriniformes; Cyprinidae; Danio	PF03645.14^Tctex-1^Tctex-1 family^86-182^E:3e-23	.	.	KEGG:dre:447884	PTHR21255:SF56	GO:0060271^biological_process^cilium assembly	GO:0060271^biological_process^cilium assembly	.	CCAACATACATAACCTACATGGAAAGCTAGTAACAACACATTCACACAAACAAAATAATTCAGAGAGACAATAAATGAGAGATAGCCTAATTTGAGTGTCCAGAATTGCCATGTACATAGCGGTTAACAAGTAACGAAGTTAGAAAAACTTGACAACTCAATGAACTTGTAATCCACTGAACATTGTTGTACAACAACCAAAAGAACAAATAATATGGCATCTAAAAACAACATGGATAAAGTTGTCGGCCAGACAAATAAATTGATGGCAGCGGATAAACAGGGCAATCAGAAAAGTCGAAGAAAAAGCCAACTGCCTCCTGGGACAACCTCAGGTGTCCCTGCGAGTAAAAATGTAGCTCCGAGTACAAGATCCTCCGTCTCGGAGGTGCCGACCCA…	MASKNNMDKVVGQTNKLMAADKQGNQKSRRKSQLPPGTTSGVPASKNVAPSTRSSVSEVPTHRQMVTLENSYKMKPAPEETFSSCKVEKMMADVLETHLKKTEYNKDTCTKLTQELTSIIKTRVKEMGYNRYKLVCSITIGEVGGQSASMASRCVWDDTVDNSACSSFKNDSLYAVALVFAMFCE	0	11.8705	611.678	401.134	1348.98	1077.69	1592.18	1537.85	2104.06	1558.08	2223.08	2603.73	124.096
OFUSG12226.1	94.6	6.16664	0.664245	9.07076	1.18187e-19	4.77117e-18	.	.	.	.	.	.	.	.	.	.	.	AAGCGGTTGAATTATGTATACCGTCTCATGCATAATTACTTAGGTTGATCACACCACTTAAACTTATGGCTAACAAAATAATTCATGACTCAAGACTATGAACTGCATTGTTTTAGCAACGAGGTCAACTTAAACACAACTACTTTGTTACTCAAAATGTGACATTGCAGCTATAAACAATCTGAGTTTCAATCAGTAAAAATTCAAGTGTGATTGTTCGAAATTTAGGAACTGATAAGAGCATTTGATTAGACACAATCCTAGTAATTCATCAAGATCATTCTAAGTTGCGTTGAATTCAAGGTAACTAGCGAAGTAATACATCGAAACACTAACGAATCTAAAGAATAATCAATTACCAACCACTAAATTCATGTAAAAAACAAGCAAAAGTAGAGG…	MKTPVVPANTPEEMEIPDEAFFLDQLSGSEERGVANPPIRIPIKTHLKDVFLKTNPWHDRKLHTIIDQLDKEKRQKLDALNWAQRQFFVSSVFDHDKLHFVTDKSNEEQIETSEKQKLGRDCDHFPPLKAGIFAQTSVVKESIDSKHGTEQQNEEIRDTVRSQEQTEMTRTQSLPLLGVLRQPPAELNSAKLACSPKLTKRTSLPDIKLKNPTPSINALGHKGIRKTITTNYESLNDLHALGETRPGSAYALPRIRTKQGSVQHTSIHGKNDVLDAPLHNAPPIIETSRYHKKDCSSEDRKDELCDDKIIHRLFCTLPEHLKEVANVKSNEITTKIRNEMISRTKKKCNGEALLDERWKALVHALRKLNSD	11.4703	0	630.419	281.707	410.893	260.376	266.839	170.461	124.775	103.633	121.906	64.5521	24.804
OFUSG09678.1	11456.5	6.16552	0.445834	13.7862	3.08383e-43	7.52374e-41	TUBULIN ALPHA CHAIN	TBA3_RAT^TBA3_RAT^Q:60-1355,H:1-432^99.537%ID^E:0^RecName: Full=Tubulin alpha-3 chain;^Eukaryota; Metazoa; Chordata; Craniata; Vertebrata; Euteleostomi; Mammalia; Eutheria; Euarchontoglires; Glires; Rodentia; Myomorpha; Muroidea; Muridae; Murinae; Rattus	TBA3_RAT^TBA3_RAT^Q:60-1355,H:1-432^99.537%ID^E:0^RecName: Full=Tubulin alpha-3 chain;^Eukaryota; Metazoa; Chordata; Craniata; Vertebrata; Euteleostomi; Mammalia; Eutheria; Euarchontoglires; Glires; Rodentia; Myomorpha; Muroidea; Muridae; Murinae; Rattus	PF00091.26^Tubulin^Tubulin/FtsZ family, GTPase domain^3-213^E:3.3e-68`PF03953.18^Tubulin_C^Tubulin C-terminal domain^263-392^E:1.4e-52	.	.	KEGG:rno:500319`KEGG:rno:500363`KO:K07374	PTHR11588:SF304	GO:0036064^cellular_component^ciliary basal body`GO:0005737^cellular_component^cytoplasm`GO:0005874^cellular_component^microtubule`GO:0005525^molecular_function^GTP binding`GO:0003924^molecular_function^GTPase activity`GO:0005200^molecular_function^structural constituent of cytoskeleton`GO:0000226^biological_process^microtubule cytoskeleton organization`GO:0007017^biological_process^microtubule-b…	GO:0036064^cellular_component^ciliary basal body`GO:0005737^cellular_component^cytoplasm`GO:0005874^cellular_component^microtubule`GO:0005525^molecular_function^GTP binding`GO:0003924^molecular_function^GTPase activity`GO:0005200^molecular_function^structural constituent of cytoskeleton`GO:0000226^biological_process^microtubule cytoskeleton organization`GO:0007017^biological_process^microtubule-b…	GO:0003924^molecular_function^GTPase activity	GAGTTTTTAAGCGATTTTATTTTCATTTACTTGAAGAATACTCAACTAAACCAATCAAAATGAGGGAATGTATCTCTATCCACGTCGGACAAGCCGGTGTCCAGATCGGAAATGCCTGCTGGGAGTTGTACTGCCTTGAGCACGGAATCCAGCCTGATGGTCAGATGCCAAGTGACAAGACCATCGGAGGTGGCGATGACTCATTCAACACCTTCTTCAGTGAGACTGGGGCCGGAAAGCACGTACCAAGAGCCGTGTTTGTAGATCTCGAGCCAACTGTTGTCGATGAGGTCCGTACTGGTACCTACCGCCAATTGTTCCACCCCGAGCAGTTGATCACTGGTAAGGAGGATGCCGCCAACAACTACGCCCGTGGTCACTACACCATCGGTAAGGAGA…	MRECISIHVGQAGVQIGNACWELYCLEHGIQPDGQMPSDKTIGGGDDSFNTFFSETGAGKHVPRAVFVDLEPTVVDEVRTGTYRQLFHPEQLITGKEDAANNYARGHYTIGKEIVDLVLDRIRKLADQCTGLQGFLIFHSFGGGTGSGFTSLLMERLSVDYGKKSKLEFAIYPAPQVSTAVVEPYNSILTTHTTLEHSDCAFMVDNEAIYDICRRNLDIERPTYTNLNRLIGQIVSSITASLRFDGALNVDLTEFQTNLVPYPRIHFPLATYAPVISAEKAYHEQLSVAEITNACFEPANQMVKCDPRHGKYMACCMLYRGDVVPKDVNAAIATIKTKRTIQFVDWCPTGFKVGINYQPPTVVPGGDLAKVQRAVCMLSNTTAIAEAWARLDHKFDLMY…	41.663	32.3163	4756.38	1417.84	14326.2	6027.41	44424.5	23969.5	38424	28447	53880.9	68959.2	24001.1
OFUSG22947.1	79.3093	6.15145	1.33054	4.44544	8.77114e-06	6.04055e-05	.	.	.	.	sigP:1^24^0.785^YES	.	.	.	.	.	.	AATATATCCAGCTCATTACAGTTATCGTTCTCATATATCGAATTCTGGGAACTGTCGGAGTTTTATTTGTTTTTTGGTCGAATGACTCATTACTGACCGGGACAACCTGTGCAATATTTCCCAAGATTCGTAATGGTTTGTAGACTATATAAGTGTTGTTTGATTCGTCTATGTCAATAACAGACGAAACAAGACGACTTGCACAATAGCAAAAAAATTAAAGTGCATCATACAGATTACAGATACGGGAAAACGACTTAATAGATTATATTTACACGACTTGTATTTTGAGTCCGGCATATAAACTAAACATACAATCTATATATTAGAACAAACATCGTGAGAACAATATGGCATTGGCACTAGAAACGACGATGGCTGTAATTACCTTGATGACTT…	MALALETTMAVITLMTLLSAQVNSAPVVGTAPTWQNPCGDGSSIGDATPAVWASVTSGDGTHSTHYKEVSDSAIRAKRSIEDIQNLLVLKGRITTSKIEQIKTLKLSHMPTSEALSKAKETAHNEDSLRRARKELAEVSVFLKHMIEEEEDVFIGQTSASLLNEMKEFEQKYFYGGVFCNVHHTMIATGVNHDFNFNHEGRIRDSIIDLLGNEAQRNVAYYIILRDMGNLFDFQKLEFLELAKKNAS	11.4508	1.07843	1438.82	150.396	275.41	112.212	41.346	3.42195	2.89163	12.447	9.72308	4.49224	26.2866
OFUSG08992.2	135.678	6.14947	1.13854	4.41395	1.015e-05	6.88034e-05	3-HYDROXY-3-METHYLGLUTARYL-COENZYME A REDUCTASE	HMDH_PYRHO^HMDH_PYRHO^Q:134-1402,H:4-413^31.163%ID^E:2.48e-56^RecName: Full=3-hydroxy-3-methylglutaryl-coenzyme A reductase;^Archaea; Euryarchaeota; Thermococci; Thermococcales; Thermococcaceae; Pyrococcus	HMDH_PYRHO^HMDH_PYRHO^Q:134-1402,H:4-413^31.163%ID^E:2.48e-56^RecName: Full=3-hydroxy-3-methylglutaryl-coenzyme A reductase;^Archaea; Euryarchaeota; Thermococci; Thermococcales; Thermococcaceae; Pyrococcus	PF00368.19^HMG-CoA_red^Hydroxymethylglutaryl-coenzyme A reductase^2-387^E:2e-69	.	.	KEGG:pho:PH1805`KO:K00021	PTHR10572	GO:0004420^molecular_function^hydroxymethylglutaryl-CoA reductase (NADPH) activity`GO:0015936^biological_process^coenzyme A metabolic process`GO:0008299^biological_process^isoprenoid biosynthetic process	GO:0004420^molecular_function^hydroxymethylglutaryl-CoA reductase (NADPH) activity`GO:0015936^biological_process^coenzyme A metabolic process`GO:0008299^biological_process^isoprenoid biosynthetic process	GO:0004420^molecular_function^hydroxymethylglutaryl-CoA reductase (NADPH) activity`GO:0050662^molecular_function^obsolete coenzyme binding`GO:0015936^biological_process^coenzyme A metabolic process`GO:0055114^biological_process^oxidation-reduction process	TATTATGCATTTTACTCAAATGTTTACATTTACACATTGGATTTGTTCGGATGCTAATCTCATTTTGAACTTTTCATTATCCAACGTATGAAAAGATAGAGTTCCATTGTTTGTAACACGAAGAAGTAAATGGGGCCCAGTTGAAATTACTGATGTAATTGACAAGACCTACCATGAACAGTCTAAGAAGACTGGGATTCCGTACGTTCCCGGTGACCAACTCAATGGCCACTCAGAAGAAATGTGTGAAGCACGCCGAAAGTGGGTAGAATCATCAGCTGGGAAAGAACTCCCATATTTAAAAGGATGGTGGAGTCCACATTCAGACACAACAACCGACGAACTTCACGGCCTAATAGAGTGCCCCATCGGAATGTCTCGGATTCCCGTAGGAATGGG…	MCEARRKWVESSAGKELPYLKGWWSPHSDTTTDELHGLIECPIGMSRIPVGMGGPLLFNGTNVKDYVVAPIATTEGAMVASATRGSRAFNGSNGVVTCVVKETISQSPMFVTSNVKQADMLSKWLQSKQEFIQRVIVARYSDKVTLSKLKPFIDCETLHMLHVFTTSDDCVVDYDLNILTHAISKDIATWVEETVPLELPYVDITASWAYSGLVGDRKPVQHNSMASRGIAVAAEGYISKHHLAKYLKTSAAKLYETWMLARRANTRSCTIGTTANASNLVTAIFIATGQNLGYISESSVCYTSIEKDSNGGVQVKVDMPQVMLSLKGGAVNLPTQRDCLRIIACEGQDKTRRLAEIIAGFTMALEVSLISAVSAGHFAEAHDRLGRNRPKE	1.04217	0	53.5024	105.415	245.16	538.775	498.933	661.749	576.642	585.87	234.96	69.3712	78.479
OFUSG16621.1	561.662	6.14451	0.777812	7.86688	3.63597e-15	9.23207e-14	ARMADILLO-TYPE FOLD-RELATED	.	.	PF13676.7^TIR_2^TIR domain^6-126^E:1.3e-13	.	.	.	PTHR46270	.	.	GO:0005515^molecular_function^protein binding`GO:0007165^biological_process^signal transduction	TATACATTTACCTCAGTAGGGACCCAGGTAGGGGAACAGTTCTTTTGGCGATCATAGTTAATGATATTTGCAATCAGTTCATTCAAGTGTGACTAAGAGGAGACACATACCAAAATCAACCCATTGATTCAGTTACACATTTGTACATTAAGCCAAGAGATAAGCTGGATTTGGATTATATTTGGATATATAAAATTAAACCATGCAAGGCAAACATGTAATGTTATCCTACCAATTTGCTCAACAAAGCATGGTTGAGGGAGTATATGATGCTCTTAAAGCTAAAGGAATCCCAGTATGGATGGCCCTTCATAGAGACATGGCAGGACAACTTCATGAAAGTACCCTCTATGGTGTTGAGAATGCCATGGTCATCTGCTGTTTCGTGTCAACAAAATA…	MQGKHVMLSYQFAQQSMVEGVYDALKAKGIPVWMALHRDMAGQLHESTLYGVENAMVICCFVSTKYQESWNCKTELSYAYSLDKCIIPCMTEQGFKASDWLGEITTGLEGIDLGEEADDPNKIKSLIKEIMYQAGQKKSKNIPTPGLKEQSKAEEQTIEEQTIRKAQATTMAVAS	24.9666	4.31949	1567.16	665.555	3372.75	2728.19	2458.05	1927.73	916.675	739.475	245.841	209.558	38.8626
OFUSG24400.3	307.006	6.13708	1.04971	5.76015	8.40396e-09	9.62801e-08	RNA-BINDING MOTIF, SINGLE-STRANDED-INTERACTING PROTEIN 1	RBMS3_HUMAN^RBMS3_HUMAN^Q:135-1049,H:55-349^52.351%ID^E:1.41e-94^RecName: Full=RNA-binding motif, single-stranded-interacting protein 3;^Eukaryota; Metazoa; Chordata; Craniata; Vertebrata; Euteleostomi; Mammalia; Eutheria; Euarchontoglires; Primates; Haplorrhini; Catarrhini; Hominidae; Homo	RBMS3_HUMAN^RBMS3_HUMAN^Q:135-1049,H:55-349^52.351%ID^E:1.41e-94^RecName: Full=RNA-binding motif, single-stranded-interacting protein 3;^Eukaryota; Metazoa; Chordata; Craniata; Vertebrata; Euteleostomi; Mammalia; Eutheria; Euarchontoglires; Primates; Haplorrhini; Catarrhini; Hominidae; Homo	PF00076.23^RRM_1^RNA recognition motif. (a.k.a. RRM, RBD, or RNP domain)^26-88^E:1.3e-14`PF00076.23^RRM_1^RNA recognition motif. (a.k.a. RRM, RBD, or RNP domain)^124-189^E:8.2e-15	.	.	KEGG:hsa:27303	PTHR24012:SF702	GO:0005737^cellular_component^cytoplasm`GO:1990904^cellular_component^ribonucleoprotein complex`GO:0035925^molecular_function^mRNA 3'-UTR AU-rich region binding`GO:0008143^molecular_function^poly(A) binding`GO:0008266^molecular_function^poly(U) RNA binding`GO:0003723^molecular_function^RNA binding`GO:0002357^biological_process^defense response to tumor cell`GO:0090090^biological_process^negative …	GO:0005737^cellular_component^cytoplasm`GO:1990904^cellular_component^ribonucleoprotein complex`GO:0035925^molecular_function^mRNA 3'-UTR AU-rich region binding`GO:0008143^molecular_function^poly(A) binding`GO:0008266^molecular_function^poly(U) RNA binding`GO:0003723^molecular_function^RNA binding`GO:0002357^biological_process^defense response to tumor cell`GO:0090090^biological_process^negative …	GO:0003676^molecular_function^nucleic acid binding	GTAACCAAGGCAACCGCTATGCGAGTCCACACCCTGCTGCCTATGGAAGCTACACTCCTAATACCTACCCATCTAGCCGCACTATGCCTGCCGCCAGCCCCAATACCACAAGCAGTCAGTCCAGTAATAGCTCTGGGGAACAACTTAGCCGTACAAACCTCTACATCCGTGGCCTCACTCCCAACACAACAGATAAAGACCTCATCAATCTATGTCAACAATATGGTAAAATAGTATCTACAAAAGCAATAATCGACCAGAATACTAACAAATGTAAAGGTTATGGATTTGTTGACTTTGAATCTCTCCATGCGGCGGATGGGGCAGTGAAGGCGCTCCAAGCTCAGGGAATACAGGCTCAAATGGCAAAGGTGCGTACCATGCCCAGTGATGCTAATT…	MPAASPNTTSSQSSNSSGEQLSRTNLYIRGLTPNTTDKDLINLCQQYGKIVSTKAIIDQNTNKCKGYGFVDFESLHAADGAVKALQAQGIQAQMAKVRTMPSDANYSFLGSTNSGQQEQDPTNLYIANLPVHMSENDLESMFSPFGQVISTRILRDNNGISRGVGFCRMESKEKCEQIINHFNGKHIPGWKEQLLVKFADGGNKKKNQYQQRNVWTDRGDNIPLAYEQTQVAQNGYGSYSVAQSMMTQGMMAPRYSVSTTPVTNYQVPSGASWMQPTPYMIPQQTMSVMPSSVHPSQHQMDPNSVMPNLAQQMGQLQLQNAGASHLQ	9.3666	8.6315	1726.12	242.338	1301.42	1142.26	28.6288	1760.45	467.52	573.345	307.475	307.163	218.384
OFUSG02469.1	321.039	6.13478	0.822742	6.75842	1.39501e-11	2.36924e-10	GM2 GANGLIOSIDE ACTIVATOR PROTEIN	SAP3_MOUSE^SAP3_MOUSE^Q:195-653,H:34-183^34.839%ID^E:4.28e-17^RecName: Full=Ganglioside GM2 activator {ECO:0000305};^Eukaryota; Metazoa; Chordata; Craniata; Vertebrata; Euteleostomi; Mammalia; Eutheria; Euarchontoglires; Glires; Rodentia; Myomorpha; Muroidea; Muridae; Murinae; Mus; Mus	SAP3_MOUSE^SAP3_MOUSE^Q:195-653,H:34-183^34.839%ID^E:4.28e-17^RecName: Full=Ganglioside GM2 activator {ECO:0000305};^Eukaryota; Metazoa; Chordata; Craniata; Vertebrata; Euteleostomi; Mammalia; Eutheria; Euarchontoglires; Glires; Rodentia; Myomorpha; Muroidea; Muridae; Murinae; Mus; Mus	PF02221.16^E1_DerP2_DerF2^ML domain^30-188^E:5.8e-15	sigP:1^19^0.635^YES	.	KEGG:mmu:14667`KO:K12383	PTHR17357	GO:0016324^cellular_component^apical plasma membrane`GO:0016323^cellular_component^basolateral plasma membrane`GO:0009898^cellular_component^cytoplasmic side of plasma membrane`GO:0005764^cellular_component^lysosome`GO:0005739^cellular_component^mitochondrion`GO:0032428^molecular_function^beta-N-acetylgalactosaminidase activity`GO:0004563^molecular_function^beta-N-acetylhexosaminidase activity`GO…	GO:0016324^cellular_component^apical plasma membrane`GO:0016323^cellular_component^basolateral plasma membrane`GO:0009898^cellular_component^cytoplasmic side of plasma membrane`GO:0005764^cellular_component^lysosome`GO:0005739^cellular_component^mitochondrion`GO:0032428^molecular_function^beta-N-acetylgalactosaminidase activity`GO:0004563^molecular_function^beta-N-acetylhexosaminidase activity`GO…	.	AGAAACAGCGAGGAAGAATCAAATAAACGAAACTATTATTTTGAAAACGAATAAATAAAAAGGGGAAATCTTTAATTTCGTTTCGTTTCTGATACGCATAGAGAAGGATGAATCTGCTTCATTGTATAGCGCTAGTAATTCTAGAAATAATTTTAACAGAAGGAAGGAAGCGGCATTCGAGAGCGCATAAGCAACTAGAATACTCAGATTGTGGAGATGGCCCGAACAAAGCTGTATTTATCAACCACGCCATCGCCGACCCACTGCCCATTGTGTCCCCGGGGAAACTGCGCGTATCAGCAGGAGTGAACATCACCCGGGCACTGCCTTACTCTATGTACCTCGACCTCACCGTCACCAAATACTTTCTAGGCCTCCCGTTTCTACTACCGTGTATAA…	MNLLHCIALVILEIILTEGRKRHSRAHKQLEYSDCGDGPNKAVFINHAIADPLPIVSPGKLRVSAGVNITRALPYSMYLDLTVTKYFLGLPFLLPCINGIVGTCEYRNMCSYLEIFKGGNCPRVLQDQGLPCTCPVQPGTYKVKDVNLKIPKLEGISSLLAQGEYEITAKLMDDVTRGELGCIKIKFTMKRRKKKSGWFFK	3.12586	0	173.8	110.647	682.784	574.776	1462.06	1489.82	464.937	493.686	1311.82	633.912	1263.57
OFUSG24263.1	1078.71	6.13035	0.785339	7.24195	4.42276e-13	8.98546e-12	COLLAGEN	.	.	PF01391.19^Collagen^Collagen triple helix repeat (20 copies)^3-58^E:5e-08`PF01391.19^Collagen^Collagen triple helix repeat (20 copies)^86-132^E:7.7e-08	.	.	.	PTHR24637:SF347	.	.	.	gaacagggggtccaccaggaacagtcggtccaccaggcacaagtggtccaccaggaacggttggtcccccaggaacaaatggtccgcccggatcaggaggtcctcctggtaccgaaggcccacctggtacggtaggtccacctggtaccataggtccaccaggaacaagtgggccatatactggaggtccacctgggacatcgggtccaccaggaaccattggaacaggcggtccacctggaacaggaaattcggttcagggcacaaagggagagtctggaccacccggaacggttggaccaacgggactacCCGGGACTGAAGGACAAAAAGGAATACAGGGAGAATTTGGAAGCAAGGGAATGCCCGGCGCAAAGGGAATGAAGGGTGCAGCAGGGT…	TGGPPGTVGPPGTSGPPGTVGPPGTNGPPGSGGPPGTEGPPGTVGPPGTIGPPGTSGPYTGGPPGTSGPPGTIGTGGPPGTGNSVQGTKGESGPPGTVGPTGLPGTEGQKGIQGEFGSKGMPGAKGMKGAAGSVHAMQVAMHQVNIEGFCGQEYNRYIRRFKTYHLIQGLPCEEYVVCYLGSGVTKRCPAGLRLDTNTATCTLLCDEKTLEHAVIGALIITGFVFLCGALVIFRSKQRLNRYLPQKQVEDVALF	4.15386	0	283.048	99.3677	2918.9	1616.91	5521.41	4648.37	5211.29	6298.42	1230.32	1130.13	153.805
OFUSG04867.2	122.128	6.11156	1.28682	4.56054	5.10233e-06	3.67255e-05	FORKHEAD BOX PROTEIN H1	FAST3_XENLA^FAST3_XENLA^Q:140-436,H:75-173^51.515%ID^E:9.32e-29^RecName: Full=Forkhead activin signal transducer 3;^Eukaryota; Metazoa; Chordata; Craniata; Vertebrata; Euteleostomi; Amphibia; Batrachia; Anura; Pipoidea; Pipidae; Xenopodinae; Xenopus; Xenopus	FAST3_XENLA^FAST3_XENLA^Q:140-436,H:75-173^51.515%ID^E:9.32e-29^RecName: Full=Forkhead activin signal transducer 3;^Eukaryota; Metazoa; Chordata; Craniata; Vertebrata; Euteleostomi; Amphibia; Batrachia; Anura; Pipoidea; Pipidae; Xenopodinae; Xenopus; Xenopus	PF00250.19^Forkhead^Forkhead domain^41-120^E:5.7e-25	.	.	KEGG:xla:100337554`KO:K09400	PTHR11829:SF340	GO:0032444^cellular_component^activin responsive factor complex`GO:0005634^cellular_component^nucleus`GO:0003700^molecular_function^DNA-binding transcription factor activity`GO:0019904^molecular_function^protein domain specific binding`GO:0043565^molecular_function^sequence-specific DNA binding`GO:0046332^molecular_function^SMAD binding`GO:0001702^biological_process^gastrulation with mouth formin…	GO:0032444^cellular_component^activin responsive factor complex`GO:0005634^cellular_component^nucleus`GO:0003700^molecular_function^DNA-binding transcription factor activity`GO:0019904^molecular_function^protein domain specific binding`GO:0043565^molecular_function^sequence-specific DNA binding`GO:0046332^molecular_function^SMAD binding`GO:0001702^biological_process^gastrulation with mouth formin…	GO:0003700^molecular_function^DNA-binding transcription factor activity`GO:0043565^molecular_function^sequence-specific DNA binding`GO:0006355^biological_process^regulation of transcription, DNA-templated	AAAATCCATTTTACAAAAGTTTCTTGCTAATTTCTTGCAGATGCCGATTGACAAGACACATGCGCATAGTACTTGGAGACAAGAGATTCGCGGCACAAAAACGCCATACAGGCGTTACCCTAAACCGCCATATAGCTACCTCGGGCTGATGGTAACTGCGATTTATAACTCACCGGATCAGCAACTTTCTCTCTCGGACATCTGCCGTACACTGGAGAACATGTTTCCATTCTTCAAGCAGGAGTACAGAGGATGGAAGGACTCCGTGAGACACAACCTATCACATAATACATGCTTCGTTAAACGTCTCAAAGATCCAGCGTTCCCCAACAAGAAGGGGAACTTCTGGGCCGTTGATTTGGACAAAGTACCCCATGATGCTTTCAAACGCCAGGACAC…	KSILQKFLANFLQMPIDKTHAHSTWRQEIRGTKTPYRRYPKPPYSYLGLMVTAIYNSPDQQLSLSDICRTLENMFPFFKQEYRGWKDSVRHNLSHNTCFVKRLKDPAFPNKKGNFWAVDLDKVPHDAFKRQDTSVARESAFSIDLHTELNLPGIPVAKNDSATIQTSFGLEVPHSETFSQRKFGPSLAFSVENILKKDTVKKDSKSRLSTGSDTSASSDCNGNAQSPRFINSSDRSPLSNAKSNAPTGYPYPFHLIQNIMYPYTYAYPSPVSYQPILATLPTQQDLGHLSNAHALATSNYSNIYTKHSPVVSHALPRDRDEELGKIDFPSNNSLLTFADYALQHGHC	6.24853	15.0853	1368.33	947.05	182.221	613.97	31.7952	47.9427	0	0	8.90986	0.486714	3.93454
OFUSG03525.1	2178.81	6.11026	0.684767	8.35957	6.29494e-17	1.97117e-15	D-DOPACHROME DECARBOXYLASE	MIF_PIG^MIF_PIG^Q:108-413,H:1-101^23.529%ID^E:2.76e-06^RecName: Full=Macrophage migration inhibitory factor;^Eukaryota; Metazoa; Chordata; Craniata; Vertebrata; Euteleostomi; Mammalia; Eutheria; Laurasiatheria; Artiodactyla; Suina; Suidae; Sus	MIF_PIG^MIF_PIG^Q:108-413,H:1-101^23.529%ID^E:2.76e-06^RecName: Full=Macrophage migration inhibitory factor;^Eukaryota; Metazoa; Chordata; Craniata; Vertebrata; Euteleostomi; Mammalia; Eutheria; Laurasiatheria; Artiodactyla; Suina; Suidae; Sus	PF01187.19^MIF^Macrophage migration inhibitory factor (MIF)^26-127^E:1.1e-11	.	.	KEGG:ssc:397412`KO:K07253	PTHR11954:SF22	GO:0009986^cellular_component^cell surface`GO:0005829^cellular_component^cytosol`GO:0005615^cellular_component^extracellular space`GO:0005654^cellular_component^nucleoplasm`GO:0005886^cellular_component^plasma membrane`GO:0042056^molecular_function^chemoattractant activity`GO:0005125^molecular_function^cytokine activity`GO:0005126^molecular_function^cytokine receptor binding`GO:0004167^molecular_…	GO:0009986^cellular_component^cell surface`GO:0005829^cellular_component^cytosol`GO:0005615^cellular_component^extracellular space`GO:0005654^cellular_component^nucleoplasm`GO:0005886^cellular_component^plasma membrane`GO:0042056^molecular_function^chemoattractant activity`GO:0005125^molecular_function^cytokine activity`GO:0005126^molecular_function^cytokine receptor binding`GO:0004167^molecular_…	.	CTTGTATTTGTTCATCTGTTTCTGAATGGCTACTTATGAAAGTACGATTGTTCATTAACTTGACCTACCTCACTCTCAAAATCCACCCATCACATCAAGAGGACAAAATGCCTCTTGCAGTAGTCAGAACTAACCTTAATAAGACAGCAACTCCGAAGAGTTTCTTGGCAGATTTTACAGATTTTATCGTAAAGACGTTAGGATGCGACGAAAAGTACACAATGATCGAAATGCACACTGATGTCCCAATGATGCGGGCCGGAACTACAGCACCTATGTTAAATCTTGACATACATCACGCAGATGATCAAGTTACAGACGATACCAAGCGGGAACTAGCTGCGAAATTTGCTGAATTCCTTGTCTCACAAGTTGAAGTACCAATTGATAGAATTTTGG…	MKVRLFINLTYLTLKIHPSHQEDKMPLAVVRTNLNKTATPKSFLADFTDFIVKTLGCDEKYTMIEMHTDVPMMRAGTTAPMLNLDIHHADDQVTDDTKRELAAKFAEFLVSQVEVPIDRILVLFFDSRQCTSIHSITSL	5.19056	0	191.293	262.666	1904.15	2210.52	6148.55	7386.49	13406.7	11774.7	3341.29	4916.18	7254.98
OFUSG12145.2	1596.62	6.10591	0.46007	12.7653	2.5603e-37	4.10482e-35	GALECTIN-9	LEG4_HUMAN^LEG4_HUMAN^Q:343-1206,H:16-322^34.385%ID^E:4.72e-46^RecName: Full=Galectin-4;^Eukaryota; Metazoa; Chordata; Craniata; Vertebrata; Euteleostomi; Mammalia; Eutheria; Euarchontoglires; Primates; Haplorrhini; Catarrhini; Hominidae; Homo`LEG4_HUMAN^LEG4_HUMAN^Q:778-1203,H:10-147^32.394%ID^E:4.85e-19^RecName: Full=Galectin-4;^Eukaryota; Metazoa; Chordata; Craniata; Vertebrata; Euteleostomi; …	LEG4_HUMAN^LEG4_HUMAN^Q:343-1206,H:16-322^34.385%ID^E:4.72e-46^RecName: Full=Galectin-4;^Eukaryota; Metazoa; Chordata; Craniata; Vertebrata; Euteleostomi; Mammalia; Eutheria; Euarchontoglires; Primates; Haplorrhini; Catarrhini; Hominidae; Homo`LEG4_HUMAN^LEG4_HUMAN^Q:778-1203,H:10-147^32.394%ID^E:4.85e-19^RecName: Full=Galectin-4;^Eukaryota; Metazoa; Chordata; Craniata; Vertebrata; Euteleostomi; …	PF00337.23^Gal-bind_lectin^Galactoside-binding lectin^23-144^E:6.6e-31`PF00337.23^Gal-bind_lectin^Galactoside-binding lectin^167-300^E:1.4e-39	.	.	KEGG:hsa:3960`KO:K10091	PTHR11346:SF80	GO:0062023^cellular_component^collagen-containing extracellular matrix`GO:0005829^cellular_component^cytosol`GO:0005615^cellular_component^extracellular space`GO:0005886^cellular_component^plasma membrane`GO:0030246^molecular_function^carbohydrate binding`GO:0016936^molecular_function^galactoside binding`GO:0007155^biological_process^cell adhesion	GO:0062023^cellular_component^collagen-containing extracellular matrix`GO:0005829^cellular_component^cytosol`GO:0005615^cellular_component^extracellular space`GO:0005886^cellular_component^plasma membrane`GO:0030246^molecular_function^carbohydrate binding`GO:0016936^molecular_function^galactoside binding`GO:0007155^biological_process^cell adhesion	GO:0030246^molecular_function^carbohydrate binding	GAAGTACACCAATTATCCAAGCTGTTATCAGTACATCCGTTGTAAATACTTATTAAATATTACTATTTTGTGTGTCCTATCATACATCTTTGTAAACAAGTTGAACAAACAAAAATGTAGCATTTTGGTTATTGGTTATCCATTAACAAACATCATATTTGATGATTGATAAGACCTGTTAAACTTTGGTCAATATATACCTCCTCAGGTATTAATTGAAATATAGTCCACAACGCGCATTGCTCAAAGTCCCTCAGACCTAAAAACCCAAGGTGACACTTAGGAGAATCCTTTACAAAGAAAATGGCATCATCTGGAGTTTTATCATATCCTGGAGGCACTGTGTTGCCCTACAGATTCCCTGTGAGCCAAGGTGGACTAAACCATGGCAACATTGTT…	MASSGVLSYPGGTVLPYRFPVSQGGLNHGNIVVVQGWIPKNAKRFEINLICDDDNWAFHLNPRFAAGFFESDRIVRNTKIGNGWGPEEDSGAFPLKKDSAFDIVILVQDDCFRVAINGQHYCEYNHRVMKDNIREVMIDGDVALITATQPRDTVQALSEPAFNVSVPYTEQLPSGIQPGTMIFLAGKIKKDSQRFHINLQSADIGSPYADIALHFNPRFKPKKQVVRNNMNKGKWGDEETKAPGFPFKPDTPFTILILVEEDGFKVAVNHQHYLDFEHRMANLSTINTLYVEGDVMIAEVRTQY	7.2959	3.22732	434.9	350.666	2429.2	1976.2	5653.12	5470.94	8460.19	6955.57	3183.08	2669.83	5480.55
OFUSG16469.4	190.302	6.10412	0.714843	8.24988	1.58559e-16	4.77328e-15	NUCLEAR HORMONE RECEPTOR HR38-RELATED	HR38_DROME^HR38_DROME^Q:1310-2326,H:741-1073^66.667%ID^E:5.68e-127^RecName: Full=Probable nuclear hormone receptor HR38;^Eukaryota; Metazoa; Ecdysozoa; Arthropoda; Hexapoda; Insecta; Pterygota; Neoptera; Holometabola; Diptera; Brachycera; Muscomorpha; Ephydroidea; Drosophilidae; Drosophila; Sophophora	HR38_DROME^HR38_DROME^Q:1310-2326,H:741-1073^66.667%ID^E:5.68e-127^RecName: Full=Probable nuclear hormone receptor HR38;^Eukaryota; Metazoa; Ecdysozoa; Arthropoda; Hexapoda; Insecta; Pterygota; Neoptera; Holometabola; Diptera; Brachycera; Muscomorpha; Ephydroidea; Drosophilidae; Drosophila; Sophophora	PF00105.19^zf-C4^Zinc finger, C4 type (two domains)^369-438^E:1.9e-29`PF00104.31^Hormone_recep^Ligand-binding domain of nuclear hormone receptor^512-685^E:5.9e-22	.	.	KEGG:dme:Dmel_CG1864`KO:K08558	PTHR24085:SF4	GO:0005737^cellular_component^cytoplasm`GO:0042025^cellular_component^host cell nucleus`GO:0005634^cellular_component^nucleus`GO:0005667^cellular_component^transcription regulator complex`GO:0001046^molecular_function^core promoter sequence-specific DNA binding`GO:0035259^molecular_function^glucocorticoid receptor binding`GO:0004879^molecular_function^nuclear receptor activity`GO:0046982^molecula…	GO:0005737^cellular_component^cytoplasm`GO:0042025^cellular_component^host cell nucleus`GO:0005634^cellular_component^nucleus`GO:0005667^cellular_component^transcription regulator complex`GO:0001046^molecular_function^core promoter sequence-specific DNA binding`GO:0035259^molecular_function^glucocorticoid receptor binding`GO:0004879^molecular_function^nuclear receptor activity`GO:0046982^molecula…	GO:0003700^molecular_function^DNA-binding transcription factor activity`GO:0008270^molecular_function^zinc ion binding`GO:0043565^molecular_function^sequence-specific DNA binding`GO:0006355^biological_process^regulation of transcription, DNA-templated`GO:0005634^cellular_component^nucleus	TGTGGATGGACCGGGAGAGGATACAGGGCCCCCATCGTGTCACATTACTTTCAGATCAGCAGAAAAATAATAGCTCATAAAACATAATTGCAAAAACAAAACGAAAACAAATAAATTAGGAAAATACACCAGGGAAACATTTACATATGTTAATGAGCATACAATTAAGGGAAATAGTGTTATCGTTATTATATTATCAGTTTATAAAATGTATAGTATGCCTATGCATAGTCAAGTCAGTTTGGGAGACTGGCATTCGGCGTATCACGACCAAAGTTGGTCTCGACAACAGCAAACAAACTGGAATCGGCAAAACTCCGCACTATCACCAGAACTGCCACTTGCGACAAACACAACCAACAGGCTGTCTTCAGCGGAAGCATTGACGCCCCACTCGGC…	MYSMPMHSQVSLGDWHSAYHDQSWSRQQQTNWNRQNSALSPELPLATNTTNRLSSAEALTPHSASTGTILPNNSSDTTAMLVLQAQTTFNSSLPNVENLTSSAYCVNSINNMGGESYQTASFPQQYPSEGSFTSGTPPCESYQQTFENPMQGTQSYSTTNSLPSFQDTYTSQSFMYDSNECLSERPAQGNSPTQSDKEPNVIMHYQGHYQKYPIDNVPNYFKQGLPFGGEGQEQGEFFQKREAPDYSNSSCAGFQAGFIEPKISQFAGQQMFPGDAYQGYQAGMFEQDFKLSQESGFQGGVPYRADLNVQIARQPFSGRRSSMNLNSPLTPDSSMDMAKYSNLHSPGTSPTPTSTRSSPSREMPVKEGQLCAVCGDNAACQHYGVRTCEGCKGFFKRTV…	3.13188	4.28902	271.847	317.997	596.984	693.19	265.028	319.834	239.611	472.813	213.099	200.023	1519.77
OFUSG02750.1	765.088	6.0969	0.84749	6.7495	1.48354e-11	2.512e-10	SUBFAMILY NOT NAMED	CLC4K_HUMAN^CLC4K_HUMAN^Q:509-1306,H:83-321^27.574%ID^E:9.09e-18^RecName: Full=C-type lectin domain family 4 member K;^Eukaryota; Metazoa; Chordata; Craniata; Vertebrata; Euteleostomi; Mammalia; Eutheria; Euarchontoglires; Primates; Haplorrhini; Catarrhini; Hominidae; Homo	CLC4K_HUMAN^CLC4K_HUMAN^Q:509-1306,H:83-321^27.574%ID^E:9.09e-18^RecName: Full=C-type lectin domain family 4 member K;^Eukaryota; Metazoa; Chordata; Craniata; Vertebrata; Euteleostomi; Mammalia; Eutheria; Euarchontoglires; Primates; Haplorrhini; Catarrhini; Hominidae; Homo	PF01442.19^Apolipoprotein^Apolipoprotein A1/A4/E domain^95-220^E:0.00089`PF00059.22^Lectin_C^Lectin C-type domain^265-374^E:2e-15	sigP:1^26^0.62^YES	.	KEGG:hsa:50489`KO:K06561	PTHR22803:SF110	GO:0030669^cellular_component^clathrin-coated endocytic vesicle membrane`GO:0031901^cellular_component^early endosome membrane`GO:0030139^cellular_component^endocytic vesicle`GO:0016021^cellular_component^integral component of membrane`GO:0005886^cellular_component^plasma membrane`GO:0030246^molecular_function^carbohydrate binding`GO:0005537^molecular_function^mannose binding`GO:0002479^biologica…	GO:0030669^cellular_component^clathrin-coated endocytic vesicle membrane`GO:0031901^cellular_component^early endosome membrane`GO:0030139^cellular_component^endocytic vesicle`GO:0016021^cellular_component^integral component of membrane`GO:0005886^cellular_component^plasma membrane`GO:0030246^molecular_function^carbohydrate binding`GO:0005537^molecular_function^mannose binding`GO:0002479^biologica…	GO:0008289^molecular_function^lipid binding`GO:0006869^biological_process^lipid transport`GO:0042157^biological_process^lipoprotein metabolic process`GO:0005576^cellular_component^extracellular region	TAAATTCTTTAATCACAATCATAACACAATCGTGGCTATTTGGGACTTATCAACATTGCGTGAGTACATTACAAGTATATACAAAAAGAATTAAAGTCGATCAGCTAGGAAGTACTTACAAATGAAACCACGTGATCATTATTGTAAATAAAGCATTCAGACGTTTGATATTATATAGAGAATGAATCTAGAGAAAGCGACCATGGATTTATCTATGACATTTATATGGATACTTTCTGTTTTTCAAATCGCGGCCACACAAGAGACAATCTCACAAAGTTTTTGTAAATTGCATGATGGAAAAAACTCTTACAATGTTATGGTTGATAAGGGTGACGCGGCATCTGCAGAGGGACTTAAGCGTATCTCTGATAAGCTTCGCACTATGGAAAATAATTA…	MNLEKATMDLSMTFIWILSVFQIAATQETISQSFCKLHDGKNSYNVMVDKGDAASAEGLKRISDKLRTMENNYTAKIHDLLVNVVKLQSESLSLETIKQETVQMQEDMVAQIENFTTTVNSLQNDLRSQGLHFSKELTDLTNEFQTEVKLKLHSEVETLKRAISDASSNLTQKLNKFYQNVSQSVTNLTKDIFTLKVDYEAEKQEMTNKIVELETKLNSTQLAMHDLSLKVNLLWNQSRIVFDCPSGFMKHSDLMTCYKFVARDLTWFDAQQLCKIHNAHLVAIETDVEQNYLISHIRTTSGLMGHHFWTGGTDFAVEKDWVWATNNLPFVYNKWKPGEPDDANAGEHCMNLAFEANYAWTDEDCMKTSYSICEHILPGHS	2.08479	2.15104	301.605	105.401	4577.63	2384.75	4761.38	4314.99	1705.17	1525.03	519.147	273.151	156.198
[truncated: 4,369 more rows]

## Sheet: gastrula_vs_blastula_down
Gene ID	baseMean	log2(fold-change) (LFC)	log2(fold-change) standard error (LFC-SE)	statistic	p-value	adjusted p-value	PANTHER annotation	BLASTx hit	BLASTp hit	PFAM domains	SignalP	eggnog	KEGG	PANTHER ID	Gene Ontology BLASTx	Gene Ontology BLASTp	Gene Ontology PFAM domain	Transcript	Peptide	blastula rep1	blastula rep2	gastrula rep1	gastrula rep2	elongation rep1	elongation rep2	early larva rep1	early larva rep2	mitraria larva rep1	mitraria larva rep2	competent larva rep1	competent larva rep2	juvenile rep1
[truncated: 2,862 more rows]

## Sheet: elongation_vs_gastrula_up
Gene ID	baseMean	log2(fold-change) (LFC)	log2(fold-change) standard error (LFC-SE)	statistic	p-value	adjusted p-value	PANTHER annotation	BLASTx hit	BLASTp hit	PFAM domains	SignalP	eggnog	KEGG	PANTHER ID	Gene Ontology BLASTx	Gene Ontology BLASTp	Gene Ontology PFAM domain	Transcript	Peptide	blastula rep1	blastula rep2	gastrula rep1	gastrula rep2	elongation rep1	elongation rep2	early larva rep1	early larva rep2	mitraria larva rep1	mitraria larva rep2	competent larva rep1	competent larva rep2	juvenile rep1
[truncated: 1,847 more rows]

[truncated: 9 more sheets: elongation_vs_gastrula_down, early_larva_vs_elongation_up, early_larva_vs_elongation_down, mitraria_vs_early_larva_up, mitraria_vs_early_larva_down, competent_vs_mitraria_up, competent_vs_mitraria_down, juvenile_vs_competent_up, juvenile_vs_competent_down]
