# Supplementary material for: Annelid functional genomics reveal the origins of bilaterian life cycles
Source: Research Square preprint supplement (doi:10.21203/rs.3.rs-1347136/v1), 2022-02-15
Supplement: Supplementary file 3 [file 097d6baa75b682a2d8a3b095.xlsx]

## Sheet: Table1
Transposable element type	O. fusiformis	C. teleta	H. robusta	L. luymesi	E. andrei	D. gyrociliatus
Retrotransposons	0.0292351	0.0294576	0.0306823	0.0466222	0.0650905	0.000466512
LTR retrotransposons	0.0336697	0.0403297	0.0816377	0.0464453	0.0977034	0.00113188
Non-LTR retrotransposons	0.000296031	0.00120185	0.00319769	0.00170956	0.00115709	0.00011727
Long interspersed nuclear elements	0.064924	0.0621465	0.0721	0.129757	0.139071	0.00304565
Short interspersed nuclear elements	0.00171327	0.00635615	0.00359487	0.004334	0.0128564	2.78187e-05
DNA transposons	0.294139	0.139534	0.0876457	0.142291	0.229077	0.00225491
Simple sequence repeats	0.00624052	0.0151025	0.0827291	0.0156388	0.0275205	0.000321398
Non-repetitive regions	0.526011	0.682427	0.625744	0.586398	0.393257	0.992592
Unclear regions	0.0437708	0.0234445	0.012669	0.026804	0.0342675	4.25175e-05

## Sheet: Table2
Species	Superphylum	Phylum	Genome/Annotation	Source	Number of non-redundant proteins	Observations
Nematostella vectensis	N/A	Cnidaria	Nematostella_vectensis.ASM20922v1.46.gff3	Ensembl	24688
Saccoglossus kowalevskii	Deuterostomia	Hemichordata	SkowalevskiiJGIv3.0.longestTrs.gff3	OIST	34238
Strongylocentrotus purpuratus	Deuterostomia	Echinodermata	Strongylocentrotus_purpuratus.Spur_3.1.46.gff3	Ensembl	21231
Branchiostoma lanceolatum	Deuterostomia	Chordata	Branchiostoma_lanceolatum.BraLan2.46.gff3	Ensembl	35732
Lepisosteus oculatus	Deuterostomia	Chordata	Lepisosteus_oculatus.LepOcu1.dna.toplevel.fa	Ensembl	18328
Homo sapiens	Deuterostomia	Chordata	Homo_sapiens.GRCh38.dna.toplevel.fa	Ensembl	19501
Strigamia maritima	Ecdysozoa	Arthropoda	Strigamia_maritima.Smar1.46.gff3	Ensembl	14977
Tribolium castaneum	Ecdysozoa	Arthropoda	Tribolium_castaneum.Tcas5.2.46.gff3	Ensembl	16557
Owenia fusiformis	Lophotrochozoa	Annelida	Owenia_annotation_v250920.gff3	This study	30840
Capitella teleta	Lophotrochozoa	Annelida	Capitella_teleta.Capitella_teleta_v1.0.46.gff3	Ensembl	32115
Dimorphilus gyrociliatus	Lophotrochozoa	Annelida	Dgy_annot.gtf	*	14182	*Martín-Durán, J.M. et al. Nat Ecol Evol., 2020; 5(1): 231–242.
Lamellibrachia luymesi	Lophotrochozoa	Annelida	Lamellibrachia_gitRepo.gff3	**	39303	**Li, Y. et al. BMC Biol., 2019; 17(1):1–14.
Helobdella robusta	Lophotrochozoa	Annelida	Helobdella_robusta.Helro1.46.gff3	Ensembl	23359
Eisenia andrei	Lophotrochozoa	Annelida	GWHACBE00000000.gff3	National Genomics Data Center	30851
Schmidtea mediterranea	Lophotrochozoa	Platyhelminthes	smes_v2_hconf_SMESG.gff3	PlanMine	30885	https://planmine.mpibpc.mpg.de/planmine/begin.do
Notospermus geniculatus	Lophotrochozoa	Nemertea	nge_genome_v2.0.gff	OIST	43054
Lingula anatina	Lophotrochozoa	Brachiopoda	lan_genome_v2.0.gff	OIST	29771
Phoronopsis australis	Lophotrochozoa	Phoronida	pau_genome_v2.0.gff	OIST	20393
Crassostrea gigas	Lophotrochozoa	Mollusca	Crassostrea_gigas.oyster_v9.46.gff3	Ensembl	26089
Lottia gigantea	Lophotrochozoa	Mollusca	Lottia_gigantea.Lotgi1.46.gff3	Ensembl	23256
Mizuhopecten yessoensis	Lophotrochozoa	Mollusca	GCF_002113885.1_ASM211388v2_genomic.gff	NCBI	24434
Hosftenia miamia	N/A	Xenacoelomorpha	Hofstenia_miamia.HmiaM1.46.gff3	Ensembl	22454

## Sheet: Table3
Orthogroup	B. lanceolatum	C. gigas	C. teleta	D. gyrociliatus	E. andrei	H. miamia	H. robusta	H. sapiens	L. anatina	L. gigantea	L. luymesi	L. oculeatus	M. yessoensis	N. geniculatus	N. vectensis	O. fusiformis	P. australis	S. kowalevskii	S. maritima	S. mediterranea	S. purpuratus	T. castaneum	Total
TOTAL	31239	23409	29068	12700	28523	19580	19028	18472	27979	20203	29981	17834	22390	40897	20783	24068	18648	27760	12940	28421	19849	12837	–
OG0000000	364	32	90	17	44	16	31	248	37	152	51	60	83	51	70	118	40	155	42	8	80	80	1869
OG0000001	11	3	19	0	0	0	0	0	94	5	7	0	32	542	14	0	67	20	36	60	117	21	1048
OG0000002	48	1	45	0	71	9	3	0	67	10	41	9	91	337	13	1	94	12	10	2	111	13	988
OG0000003	116	139	109	4	38	3	84	18	19	16	90	25	52	12	64	69	24	40	18	1	29	6	976
OG0000004	50	4	10	0	67	32	1	2	65	3	5	14	33	341	4	0	15	2	11	78	138	68	943
OG0000005	68	118	68	5	12	0	4	26	57	29	21	42	110	13	37	61	41	99	11	5	62	5	894
OG0000006	258	5	127	0	13	15	42	0	7	8	14	2	12	101	31	0	1	1	0	0	176	41	854
OG0000007	81	47	78	15	21	6	41	8	22	31	85	3	20	10	121	69	26	33	3	12	83	3	818
OG0000008	34	31	41	22	56	20	61	46	31	37	32	54	36	35	63	35	30	33	33	26	25	26	807
OG0000009	139	35	18	8	55	11	19	21	21	34	13	26	33	29	29	51	25	74	10	30	76	7	764
OG0000010	43	19	48	29	45	15	40	9	51	20	72	9	33	47	34	45	29	40	3	9	26	0	666
OG0000011	97	16	36	0	26	15	12	39	37	25	11	42	32	38	45	12	24	65	27	14	25	12	650
OG0000012	50	18	20	30	30	4	24	34	22	32	20	41	18	20	60	35	22	16	18	10	17	24	565
OG0000013	50	33	53	3	9	8	5	12	20	13	4	39	44	7	54	17	15	5	2	1	159	1	554
OG0000014	16	34	40	27	15	18	16	19	29	28	23	27	48	45	16	29	32	21	17	17	17	10	544
OG0000015	1	538	0	0	0	1	0	0	0	0	0	0	1	0	0	0	1	1	0	0	0	0	543
OG0000016	74	17	73	10	19	28	15	8	18	17	41	14	4	14	73	43	12	26	3	1	17	4	531
OG0000017	38	19	23	18	12	19	9	10	36	16	25	17	36	47	14	43	37	41	13	5	26	12	516
OG0000018	63	21	14	12	42	20	21	9	7	53	13	10	24	8	56	46	12	30	0	7	24	1	493
OG0000019	37	53	27	10	9	5	11	2	44	22	24	2	25	9	76	52	33	17	2	4	12	2	478
OG0000020	0	0	0	0	0	0	0	0	0	446	0	0	0	0	1	0	0	0	0	0	0	0	447
OG0000021	20	15	24	20	25	11	26	25	19	26	20	26	18	27	30	21	14	18	19	10	16	16	446
OG0000022	0	0	80	24	164	0	99	0	0	0	38	0	0	0	0	2	0	1	0	0	0	0	408
OG0000023	191	0	18	0	7	2	13	0	26	12	6	29	2	20	11	0	2	9	15	0	41	0	404
OG0000024	62	0	31	6	39	9	10	13	5	8	19	7	5	12	10	39	7	24	15	0	41	18	380
OG0000025	15	16	25	7	23	10	7	8	20	31	23	8	23	24	12	40	15	24	3	8	21	8	371
OG0000026	19	12	17	11	35	11	14	19	13	12	18	26	17	20	17	16	15	18	7	18	15	20	370
OG0000027	30	6	21	1	9	0	12	4	8	4	4	5	14	3	164	32	14	2	1	2	32	0	368
OG0000028	8	13	36	11	31	4	28	5	7	18	27	8	15	22	13	21	15	39	4	14	9	6	354
OG0000029	0	0	0	0	0	0	0	342	0	0	0	9	0	0	1	0	0	0	0	0	0	0	352
OG0000030	30	21	45	0	0	0	0	0	12	12	3	0	10	136	7	3	25	25	5	0	17	0	351
OG0000031	16	13	16	12	20	10	16	32	13	17	13	31	13	17	16	13	11	17	11	14	13	10	344
OG0000032	85	5	1	2	1	3	1	4	15	12	12	2	17	12	8	31	8	95	2	0	23	0	339
OG0000033	23	16	3	9	32	9	7	17	5	13	5	25	13	15	24	12	14	32	5	3	54	2	338
OG0000034	1	12	69	10	30	0	18	0	24	13	25	0	10	12	0	76	12	0	0	23	0	0	335
OG0000035	0	0	0	0	0	0	0	0	0	0	0	0	0	0	0	0	0	332	0	0	0	0	332
OG0000036	5	20	26	19	75	2	29	29	2	21	19	21	16	3	6	1	1	2	1	31	1	1	331
OG0000037	0	11	27	23	38	28	21	0	19	10	27	0	16	0	0	14	10	0	8	69	0	9	330
OG0000038	44	14	23	4	18	6	30	9	6	14	12	9	8	10	42	21	8	25	5	8	7	5	328
OG0000039	8	19	3	5	11	5	1	4	11	4	14	5	7	9	1	10	6	10	2	23	154	3	315
OG0000040	48	79	12	0	9	0	0	0	1	7	10	0	33	10	26	31	18	13	0	0	17	0	314
OG0000041	20	12	43	3	17	0	4	6	8	8	40	4	25	10	15	51	11	0	3	3	21	4	308
OG0000042	17	3	6	0	0	6	1	0	20	15	5	4	21	110	6	1	5	5	12	0	66	5	308
OG0000043	1	6	34	11	73	0	27	2	22	10	28	2	14	20	1	30	7	0	2	14	0	3	307
OG0000044	27	14	14	12	43	13	16	11	19	10	7	11	11	16	9	12	7	28	8	8	2	5	303
OG0000045	19	16	19	0	8	2	1	0	24	18	4	0	27	68	15	0	14	53	4	0	6	2	300
OG0000046	36	8	48	9	4	13	36	3	8	11	4	4	9	10	20	10	10	22	7	0	16	3	291
OG0000047	47	8	9	2	1	2	1	13	24	10	4	14	17	7	9	30	8	42	5	4	26	6	289
OG0000048	7	0	4	0	26	98	3	3	12	2	10	12	16	33	3	2	18	14	0	14	6	5	288
OG0000049	20	5	10	3	3	0	2	3	17	12	2	6	11	23	76	31	26	12	8	5	11	2	288
OG0000050	54	22	11	4	4	0	1	3	22	9	8	7	19	9	26	14	15	20	6	0	32	1	287
OG0000051	24	15	29	14	21	2	9	7	8	8	34	7	21	14	0	18	12	19	6	6	6	7	287
OG0000052	0	0	0	0	0	0	0	0	0	283	0	0	0	0	0	0	0	0	0	0	0	0	283
OG0000053	13	12	12	8	28	2	15	19	15	11	12	21	12	12	16	11	11	13	11	9	10	9	282
OG0000054	24	12	17	1	5	0	8	5	5	9	9	4	22	17	22	9	11	17	12	12	17	41	279
OG0000055	268	1	0	0	0	0	0	0	0	2	1	1	0	0	0	1	0	0	1	0	3	0	278
OG0000056	55	17	8	5	14	6	2	8	5	6	3	4	23	8	7	29	5	28	6	6	21	6	272
OG0000057	0	0	0	0	0	0	0	0	0	0	0	0	0	0	0	0	0	0	0	271	0	0	271
OG0000058	19	31	47	1	35	0	7	6	14	23	3	9	18	4	5	16	9	13	1	0	4	1	266
OG0000059	9	11	12	8	20	7	14	22	12	12	13	23	11	11	17	9	12	10	11	4	7	10	265
OG0000060	28	22	21	1	32	0	6	4	13	19	19	7	20	15	31	15	6	0	0	1	1	0	261
OG0000061	7	0	7	0	37	63	6	2	5	0	4	2	13	51	5	1	1	5	0	31	9	9	258
OG0000062	164	0	0	1	0	0	0	0	5	0	0	0	0	0	0	53	31	3	0	0	0	0	257
OG0000063	6	3	28	0	55	22	41	0	8	4	13	0	8	45	1	1	5	1	0	1	7	5	254
OG0000064	15	8	15	6	6	1	4	9	0	45	9	7	11	1	17	14	9	21	4	34	13	4	253
OG0000065	10	12	16	5	14	6	12	9	18	4	15	6	10	13	1	7	3	5	9	56	12	10	253
OG0000066	4	4	14	5	11	16	5	10	0	41	12	8	22	1	12	4	9	13	3	25	24	5	248
OG0000067	0	30	23	14	22	15	13	0	0	13	27	0	18	16	15	22	11	0	0	9	0	0	248
OG0000068	10	2	29	5	0	3	0	3	9	3	55	8	2	15	0	14	17	29	10	3	27	1	245
OG0000069	0	0	0	0	0	0	0	0	0	0	0	0	0	0	0	0	0	0	0	244	0	0	244
OG0000070	0	0	0	0	0	0	0	0	0	0	0	0	0	0	0	0	0	0	0	241	0	0	241
OG0000071	81	7	11	0	0	1	2	3	3	15	20	7	3	7	34	8	8	16	2	0	11	1	240
OG0000072	63	28	37	3	7	0	5	5	1	3	9	3	5	11	3	22	9	5	0	6	14	1	240
OG0000073	10	3	21	5	3	1	0	7	26	8	6	6	11	4	7	33	4	48	1	0	31	2	237
OG0000074	21	10	12	17	53	0	3	8	9	11	2	6	18	8	16	7	5	13	2	7	6	2	236
OG0000075	22	9	29	5	5	8	15	19	1	21	7	6	3	5	45	0	3	1	4	8	14	4	234
OG0000076	27	27	9	10	14	11	7	10	2	10	7	12	15	2	11	4	2	8	7	17	17	5	234
OG0000077	25	9	18	4	3	2	7	18	6	18	7	2	1	4	36	3	3	41	6	5	11	5	234
OG0000078	0	0	33	6	13	10	6	0	1	0	58	0	0	0	0	6	0	57	0	2	41	0	233
OG0000079	5	18	10	13	5	3	0	2	20	10	19	2	21	26	17	18	23	5	1	9	3	0	230
OG0000080	43	13	8	4	8	5	4	2	14	9	23	2	7	9	29	14	13	9	1	7	5	0	229
OG0000081	8	18	26	1	4	2	5	9	11	22	26	6	9	9	22	9	4	4	1	24	3	3	226
OG0000082	18	4	4	10	15	3	26	19	6	6	4	16	7	9	17	14	7	10	3	4	20	3	225
OG0000083	0	0	0	0	0	0	221	0	0	0	0	0	0	0	0	0	0	0	0	0	0	0	221
OG0000084	5	14	9	3	6	0	4	5	17	22	43	5	17	0	5	25	7	3	8	0	0	21	219
OG0000085	5	15	6	0	8	1	1	0	8	18	44	0	9	10	23	12	9	5	7	5	30	2	218
OG0000086	25	8	14	5	21	21	6	1	2	11	6	1	13	8	6	15	9	22	1	3	11	7	216
OG0000087	17	12	5	5	23	10	13	9	9	9	8	9	7	13	4	8	8	6	6	16	5	10	212
OG0000088	24	7	26	2	1	0	8	15	3	16	3	1	0	1	34	0	0	38	4	6	20	1	210
OG0000089	10	7	11	4	14	1	13	9	7	2	21	10	7	11	15	8	3	10	4	30	9	3	209
OG0000090	1	0	0	0	0	0	205	0	0	0	1	2	0	0	0	0	0	0	0	0	0	0	209
OG0000091	0	0	1	0	0	0	0	0	0	207	0	0	0	0	0	0	0	0	0	0	1	0	209
OG0000092	18	9	8	6	8	1	9	8	11	5	9	7	19	10	10	15	9	15	3	7	19	2	208
OG0000093	9	14	15	10	6	4	3	3	12	11	11	4	14	19	20	11	11	12	0	5	11	1	206
OG0000094	47	5	4	1	3	0	6	0	1	10	11	3	10	18	20	21	10	17	4	15	0	0	206
OG0000095	13	11	9	3	3	0	0	3	12	12	4	3	16	17	8	7	12	49	10	0	10	3	205
OG0000096	1	172	1	3	1	1	0	0	0	12	1	0	7	0	0	2	1	1	0	0	2	0	205
OG0000097	14	8	14	0	7	5	0	7	25	10	2	6	20	1	9	20	1	30	1	0	23	1	204
OG0000098	10	12	17	5	17	0	7	6	30	6	17	9	15	10	2	9	10	1	1	8	8	3	203
OG0000099	9	11	11	3	19	5	9	13	8	10	15	11	7	8	6	14	6	8	9	7	7	7	203
OG0000100	65	1	33	0	1	0	1	8	9	4	2	6	2	14	12	16	2	5	6	0	12	3	202
OG0000101	6	7	9	6	13	9	9	6	13	8	11	8	8	16	9	7	9	7	7	16	11	7	202
OG0000102	15	5	7	7	31	5	9	12	6	4	7	16	7	9	0	7	3	13	5	20	8	5	201
OG0000103	8	6	5	5	25	6	21	16	9	6	7	15	7	5	15	5	7	6	9	3	5	8	199
OG0000104	20	7	16	3	1	0	9	20	0	11	6	2	0	1	36	3	2	30	2	9	13	4	195
OG0000105	1	12	21	6	32	0	6	5	13	13	10	5	8	6	2	10	5	15	0	16	7	0	193
OG0000106	2	14	5	1	80	1	4	4	7	2	4	4	23	2	12	9	3	2	7	2	2	2	192
OG0000107	5	7	6	7	26	3	6	1	10	8	6	2	15	29	7	11	7	8	3	7	10	7	191
OG0000108	11	18	2	2	16	0	9	1	23	4	33	4	10	2	3	5	8	13	1	0	24	1	190
OG0000109	13	10	20	6	9	6	6	0	9	8	18	1	12	14	3	17	7	17	2	7	4	1	190
OG0000110	5	4	8	2	10	5	75	5	5	5	4	6	5	8	5	3	4	5	13	6	1	6	190
OG0000111	6	8	6	6	9	18	6	6	10	7	5	9	12	9	10	6	8	6	2	27	9	5	190
OG0000112	1	0	189	0	0	0	0	0	0	0	0	0	0	0	0	0	0	0	0	0	0	0	190
OG0000113	5	12	5	9	8	1	2	7	11	6	10	6	11	3	3	11	19	25	2	2	28	3	189
OG0000114	16	5	9	3	8	0	5	11	8	10	5	10	23	12	7	10	4	16	4	2	4	17	189
OG0000115	29	15	7	1	17	4	7	11	12	4	3	12	32	4	0	3	3	14	2	1	8	0	189
OG0000116	22	0	8	0	20	0	0	0	18	4	6	1	16	40	15	3	6	18	5	0	4	3	189
OG0000117	11	13	14	3	12	3	6	7	14	11	13	8	12	5	7	5	5	17	2	4	12	3	187
OG0000118	53	4	7	4	7	3	1	13	9	1	6	18	3	5	4	6	3	11	3	3	14	8	186
OG0000119	20	11	11	4	6	9	7	5	9	5	7	10	6	16	4	6	10	8	6	4	8	14	186
OG0000120	9	29	16	7	12	11	0	4	11	11	17	3	19	12	2	3	3	2	8	0	2	2	183
OG0000121	4	2	21	10	4	8	5	2	5	4	20	1	6	16	12	8	4	27	4	6	9	5	183
OG0000122	5	8	3	11	6	0	2	0	20	14	18	0	12	7	15	7	26	4	8	8	0	9	183
OG0000123	24	8	10	6	7	3	0	0	17	8	2	1	21	4	3	14	13	13	7	0	9	12	182
OG0000124	11	7	8	3	11	3	5	20	9	6	11	23	7	7	6	6	7	8	9	1	6	6	180
OG0000125	22	10	14	3	5	5	10	8	9	9	13	2	12	6	19	1	7	10	4	2	7	1	179
OG0000126	38	4	16	7	31	3	7	4	4	2	6	8	5	3	0	6	2	15	1	6	10	0	178
OG0000127	5	12	7	5	10	1	4	8	17	11	12	6	8	16	16	6	4	6	8	2	4	10	178
OG0000128	9	6	4	5	17	1	4	5	16	3	23	6	11	6	5	4	7	28	1	10	6	1	178
OG0000129	0	23	12	0	18	4	0	0	4	8	19	0	6	33	5	1	2	19	0	0	19	4	177
OG0000130	44	16	0	0	0	0	0	0	7	14	49	0	7	14	3	11	0	11	0	0	0	0	176
OG0000131	21	17	6	2	13	0	3	6	6	13	5	4	9	5	6	9	5	6	4	0	25	11	176
OG0000132	25	4	3	1	0	2	0	1	25	11	17	1	16	16	4	13	13	11	1	4	7	0	175
OG0000133	19	4	9	3	10	1	6	9	6	6	7	5	6	7	14	18	5	11	5	10	8	5	174
OG0000134	4	16	13	2	11	7	2	2	9	8	19	3	26	8	9	12	8	5	2	4	3	0	173
OG0000135	6	14	6	4	9	16	5	8	7	4	13	7	8	15	2	6	3	13	0	16	8	2	172
OG0000136	3	3	16	5	9	0	5	9	10	4	7	7	7	7	6	14	7	19	5	6	15	5	169
OG0000137	17	13	8	0	10	0	1	1	5	1	12	4	8	15	35	3	13	6	1	0	14	1	168
OG0000138	4	11	13	10	10	2	4	2	8	6	13	3	11	14	8	11	9	11	1	10	6	1	168
OG0000139	9	4	8	6	7	7	2	9	14	8	7	9	5	12	5	17	7	10	4	7	6	5	168
OG0000140	30	1	12	0	3	3	49	0	7	0	8	5	4	0	18	0	3	2	0	0	21	0	166
OG0000141	7	7	15	7	10	5	5	5	7	9	8	9	8	8	5	8	6	7	7	12	4	7	166
OG0000142	24	14	4	2	7	0	4	6	9	4	3	9	11	7	4	17	16	4	1	1	18	0	165
OG0000143	0	0	0	0	0	0	0	0	0	0	0	0	0	0	0	0	0	0	0	164	0	0	164
OG0000144	10	7	5	2	7	2	3	20	7	8	6	19	7	8	8	5	5	9	5	2	13	5	163
OG0000145	4	7	2	2	20	0	10	19	8	4	3	6	3	3	3	25	6	3	7	2	11	13	161
OG0000146	14	9	9	6	9	1	3	4	13	7	9	6	12	9	8	9	9	8	7	0	0	9	161
OG0000147	4	5	7	5	16	4	8	4	7	11	12	4	11	6	14	10	5	0	3	21	2	2	161
OG0000148	21	7	10	1	14	7	1	1	9	3	9	2	16	8	1	3	5	4	6	13	15	3	159
OG0000149	0	13	41	1	17	0	5	2	4	13	12	0	15	1	0	25	5	0	4	0	0	1	159
OG0000150	4	2	6	5	17	5	3	8	3	3	3	13	6	2	17	12	3	17	5	9	10	4	157
OG0000151	0	0	0	0	0	0	0	0	0	0	0	0	0	0	0	0	0	0	0	157	0	0	157
OG0000152	4	18	0	0	0	1	0	6	1	21	0	50	26	0	1	14	0	14	0	0	0	0	156
OG0000153	37	0	7	6	8	1	3	3	4	1	12	6	3	3	0	23	4	4	6	4	8	13	156
OG0000154	5	6	12	5	22	13	13	0	5	7	6	0	4	10	2	9	6	1	0	28	2	0	156
OG0000155	16	0	11	0	2	45	4	10	0	5	10	0	4	29	3	0	0	0	2	9	2	3	155
OG0000156	26	18	3	4	3	0	1	0	27	8	9	0	14	3	1	17	13	1	0	0	7	0	155
OG0000157	24	1	5	0	1	1	2	2	12	0	7	1	3	44	0	1	3	46	0	0	1	1	155
OG0000158	0	0	16	0	61	1	0	0	0	0	0	0	9	16	1	0	1	0	9	23	0	18	155
OG0000159	0	0	0	0	0	0	0	0	0	0	0	0	0	0	0	0	0	0	0	155	0	0	155
OG0000160	16	9	8	2	8	4	6	5	13	7	11	4	7	6	10	6	6	10	2	1	11	2	154
OG0000161	4	5	8	5	6	1	9	7	5	5	6	10	11	6	6	10	7	19	3	3	11	6	153
OG0000162	9	7	9	1	18	9	5	4	10	6	4	7	6	8	5	6	9	4	3	14	6	2	152
OG0000163	0	0	0	0	0	0	0	0	0	0	0	0	152	0	0	0	0	0	0	0	0	0	152
OG0000164	1	2	12	0	6	56	0	0	2	2	2	9	0	29	3	0	2	1	6	5	4	9	151
OG0000165	2	8	14	7	12	4	9	5	10	6	10	4	6	5	5	6	6	6	10	4	4	8	151
OG0000166	0	151	0	0	0	0	0	0	0	0	0	0	0	0	0	0	0	0	0	0	0	0	151
OG0000167	13	9	5	4	2	1	4	3	14	9	0	17	14	4	12	13	5	4	0	6	8	3	150
OG0000168	12	10	3	8	5	5	0	4	5	8	6	8	13	8	9	8	3	14	5	6	6	4	150
OG0000169	0	0	0	0	0	0	0	0	0	0	0	0	0	0	0	0	0	0	0	0	150	0	150
OG0000170	2	4	6	0	20	6	5	0	10	0	40	0	0	35	10	4	3	3	0	0	1	0	149
OG0000171	16	8	4	4	9	2	1	6	7	3	7	7	11	4	16	8	11	7	4	2	11	0	148
OG0000172	5	10	8	2	16	4	13	4	12	7	16	3	8	5	5	6	4	3	3	5	6	3	148
OG0000173	22	12	4	6	7	0	3	11	6	5	3	3	27	3	1	7	3	17	1	0	4	2	147
OG0000174	5	6	6	4	14	4	10	9	5	6	6	10	7	6	5	6	6	6	7	5	5	9	147
OG0000175	4	10	9	6	19	5	10	6	7	4	7	6	6	9	10	4	6	3	1	7	4	3	146
OG0000176	9	9	8	8	9	5	4	3	12	7	10	4	13	6	4	8	6	3	3	5	7	3	146
OG0000177	10	12	8	4	5	0	2	2	15	3	8	3	17	4	10	14	4	7	0	6	12	0	146
OG0000178	119	0	0	0	0	0	0	0	3	0	2	0	3	5	0	0	2	0	0	2	7	2	145
OG0000179	9	12	12	5	15	1	3	5	7	13	7	7	9	8	2	7	5	7	1	1	7	2	145
OG0000180	4	7	4	5	24	6	4	6	7	4	10	2	7	6	4	4	7	6	6	3	9	10	145
OG0000181	2	13	16	3	15	0	8	1	17	7	1	2	20	0	0	17	0	16	0	6	1	0	145
OG0000182	0	8	6	0	26	14	4	0	2	3	4	0	4	55	7	0	1	9	0	0	2	0	145
OG0000183	14	8	9	5	15	2	3	4	6	6	4	5	10	7	14	6	4	4	1	9	5	3	144
OG0000184	9	3	7	3	7	2	2	4	5	3	0	4	9	4	18	4	7	10	8	6	8	21	144
OG0000185	6	8	12	8	2	2	1	2	3	5	8	3	10	4	11	5	5	7	4	1	36	1	144
OG0000186	0	21	55	0	17	7	0	0	1	4	28	0	2	2	1	0	3	0	0	0	3	0	144
OG0000187	0	3	5	0	6	1	0	1	22	6	2	1	6	56	0	1	3	0	4	0	19	8	144
OG0000188	0	0	0	0	1	0	142	0	0	0	0	0	0	0	0	0	0	0	0	1	0	0	144
OG0000189	14	14	2	3	8	1	3	9	7	5	1	2	22	1	17	11	10	2	6	0	2	3	143
OG0000190	3	8	7	5	13	9	6	4	5	4	19	5	8	6	3	11	8	2	3	12	1	1	143
OG0000191	7	5	9	5	10	5	4	6	9	5	10	7	5	5	3	7	8	15	2	6	5	5	143
OG0000192	0	11	5	1	9	0	23	0	4	13	16	0	13	32	0	0	13	0	2	0	0	1	143
OG0000193	0	0	0	0	0	0	0	0	0	143	0	0	0	0	0	0	0	0	0	0	0	0	143
OG0000194	11	7	8	4	17	3	9	9	4	3	7	6	3	5	0	5	4	10	6	10	4	7	142
OG0000195	10	5	11	9	6	7	4	4	4	11	7	4	6	19	5	10	5	4	1	5	4	1	142
OG0000196	6	3	10	6	14	1	8	1	2	2	7	1	3	1	10	38	16	3	0	0	9	0	141
OG0000197	1	10	10	6	8	1	6	7	8	13	4	6	12	7	2	8	6	6	1	4	14	0	140
OG0000198	2	8	8	5	14	2	9	9	5	6	8	9	3	8	2	2	11	12	5	3	6	2	139
OG0000199	2	11	7	0	1	0	0	0	8	2	3	5	9	16	15	0	1	49	5	0	3	2	139
OG0000200	0	0	0	0	0	0	138	0	0	0	0	1	0	0	0	0	0	0	0	0	0	0	139
OG0000201	7	7	6	9	9	2	2	6	11	5	5	12	6	7	9	9	3	1	10	1	4	6	137
OG0000202	0	6	16	8	10	5	3	4	5	4	22	3	5	7	2	4	9	9	3	4	6	2	137
OG0000203	0	0	134	0	0	0	0	0	1	0	0	0	0	0	0	1	0	1	0	0	0	0	137
OG0000204	21	30	9	3	0	0	0	0	6	5	15	0	24	1	5	13	2	2	0	0	0	0	136
OG0000205	8	7	5	3	13	3	9	7	3	5	6	6	7	11	5	3	8	9	3	7	4	4	136
OG0000206	4	2	2	3	16	9	16	19	7	2	4	13	2	9	2	3	8	2	2	6	3	2	136
OG0000207	0	0	0	0	0	136	0	0	0	0	0	0	0	0	0	0	0	0	0	0	0	0	136
OG0000208	7	7	4	8	4	10	2	0	6	9	9	1	5	12	3	6	6	13	0	13	9	0	134
OG0000209	5	8	10	8	14	0	3	1	14	6	7	2	9	7	3	18	5	5	4	0	2	3	134
OG0000210	1	7	13	2	17	0	3	0	0	4	24	0	5	18	0	21	1	17	1	0	0	0	134
OG0000211	0	0	3	0	3	8	11	0	0	0	1	10	0	75	1	0	1	0	2	6	2	11	134
OG0000212	5	5	6	5	13	1	11	14	5	7	3	9	6	8	1	6	4	5	5	5	3	6	133
OG0000213	15	3	4	4	30	3	12	7	2	3	1	6	4	6	9	3	3	1	1	14	1	1	133
OG0000214	2	9	5	7	17	0	12	5	3	11	3	5	8	3	1	4	3	2	12	5	2	14	133
OG0000215	10	0	55	0	0	0	0	0	0	0	18	0	3	22	3	3	0	0	0	0	19	0	133
OG0000216	0	0	0	0	0	132	0	0	0	0	0	0	0	0	0	0	0	0	0	0	0	0	132
OG0000217	4	0	14	1	0	0	0	1	15	0	0	1	0	0	2	13	2	27	0	0	51	0	131
OG0000218	1	3	4	2	26	0	10	1	6	5	5	1	6	5	1	5	7	11	6	12	7	7	131
OG0000219	4	0	11	0	2	9	21	0	2	1	1	0	0	25	19	1	5	10	0	7	10	3	131
OG0000220	17	10	7	0	6	0	2	0	11	9	7	0	12	7	8	7	7	3	4	1	11	1	130
OG0000221	6	5	2	3	23	9	5	12	4	4	3	13	4	5	0	2	5	6	2	11	4	2	130
OG0000222	3	3	5	4	12	5	11	7	2	4	5	6	2	6	1	2	2	2	4	40	1	3	130
OG0000223	16	8	0	1	9	0	2	2	12	0	38	6	15	0	0	3	6	11	0	0	0	0	129
OG0000224	9	7	2	5	5	0	2	14	12	9	3	11	8	5	0	11	6	8	1	3	5	3	129
OG0000225	10	3	0	0	5	3	1	0	8	4	13	0	0	48	7	1	4	21	0	0	1	0	129
OG0000226	5	7	7	5	9	2	5	5	8	6	6	5	7	9	6	5	7	7	6	4	4	3	128
OG0000227	7	3	1	3	4	7	1	1	6	1	2	2	3	2	43	14	4	6	4	10	2	2	128
OG0000228	7	9	10	7	16	0	5	4	4	1	20	5	11	4	0	19	1	0	0	4	0	0	127
OG0000229	11	19	1	1	5	0	1	2	10	8	2	2	17	11	4	7	2	2	6	0	11	5	127
OG0000230	6	5	8	6	12	3	5	8	7	3	11	7	5	6	2	7	7	2	4	9	1	3	127
OG0000231	3	2	9	4	14	6	8	0	6	3	7	0	9	8	6	10	3	10	1	4	2	11	126
OG0000232	5	9	3	5	4	1	3	6	5	6	5	6	11	8	9	10	7	6	4	8	3	1	125
OG0000233	15	3	2	0	0	0	0	0	14	8	4	3	4	13	7	14	15	8	0	0	15	0	125
OG0000234	4	1	3	5	7	5	3	5	11	4	2	6	2	11	3	7	3	14	4	9	12	4	125
OG0000235	12	7	6	2	2	4	1	4	6	5	2	5	7	10	9	7	11	8	4	9	2	1	124
OG0000236	8	9	4	0	10	2	9	9	3	5	4	9	5	8	2	5	4	5	11	3	5	4	124
OG0000237	5	1	0	0	19	11	7	0	8	1	0	0	9	21	0	0	0	7	20	9	3	3	124
OG0000238	0	0	0	0	0	0	124	0	0	0	0	0	0	0	0	0	0	0	0	0	0	0	124
OG0000239	13	4	1	2	20	3	7	10	2	8	3	13	5	3	2	2	2	1	2	15	1	4	123
OG0000240	0	0	0	0	123	0	0	0	0	0	0	0	0	0	0	0	0	0	0	0	0	0	123
OG0000241	11	9	3	1	2	8	4	3	3	3	5	5	5	13	5	3	6	17	5	7	2	2	122
OG0000242	3	2	4	5	17	6	10	6	7	3	4	6	3	3	7	7	4	3	6	10	1	5	122
OG0000243	0	0	0	0	0	0	0	0	0	0	0	1	0	0	0	0	0	0	0	0	121	0	122
OG0000244	0	0	0	0	0	0	0	0	0	0	0	0	0	0	0	0	0	122	0	0	0	0	122
OG0000245	1	3	3	2	10	4	9	19	3	3	3	24	3	3	1	3	7	6	5	0	5	4	121
OG0000246	7	3	4	6	3	4	1	1	5	1	8	1	3	18	6	4	7	8	3	8	18	2	121
OG0000247	9	7	6	2	9	4	0	5	11	2	15	3	9	5	3	5	5	8	4	1	8	0	121
OG0000248	4	2	36	7	12	0	14	0	2	9	8	0	3	4	0	9	2	4	0	0	5	0	121
OG0000249	0	0	0	0	0	0	121	0	0	0	0	0	0	0	0	0	0	0	0	0	0	0	121
OG0000250	0	0	0	0	0	0	0	0	0	121	0	0	0	0	0	0	0	0	0	0	0	0	121
OG0000251	0	0	0	0	0	0	0	0	0	0	0	0	0	0	0	0	0	0	121	0	0	0	121
OG0000252	9	13	3	1	7	1	2	3	7	4	3	4	6	11	4	4	4	7	0	12	15	0	120
OG0000253	16	1	0	0	0	0	0	0	9	0	0	0	12	57	4	0	1	3	11	0	3	3	120
OG0000254	3	4	5	6	9	5	4	3	14	6	5	3	4	16	1	4	3	5	5	9	1	5	120
OG0000255	0	0	0	0	120	0	0	0	0	0	0	0	0	0	0	0	0	0	0	0	0	0	120
OG0000256	7	4	12	3	8	1	3	3	10	4	2	3	10	6	10	8	1	3	14	3	2	2	119
OG0000257	2	9	5	8	4	3	5	3	8	4	6	1	9	8	1	17	4	11	3	3	4	1	119
OG0000258	3	1	0	0	0	0	0	0	3	1	6	1	3	57	0	1	3	37	2	0	1	0	119
OG0000259	0	118	0	1	0	0	0	0	0	0	0	0	0	0	0	0	0	0	0	0	0	0	119
OG0000260	0	0	0	0	0	0	0	0	1	0	0	0	0	0	0	0	0	0	0	0	118	0	119
OG0000261	4	6	6	1	6	2	6	5	8	5	9	4	10	2	2	8	6	12	4	5	4	3	118
OG0000262	2	7	6	3	3	3	1	9	13	8	4	9	6	1	1	7	4	8	3	14	4	2	118
OG0000263	1	1	1	0	2	1	2	2	2	2	0	2	2	4	9	1	1	1	73	6	2	3	118
OG0000264	0	0	0	0	0	0	0	0	0	0	0	0	0	0	0	0	118	0	0	0	0	0	118
OG0000265	15	7	5	1	11	6	1	5	3	6	13	3	9	9	2	2	4	7	0	0	8	0	117
OG0000266	9	12	9	3	3	0	1	0	13	7	16	0	4	6	0	11	15	4	1	3	0	0	117
OG0000267	10	3	1	2	13	2	7	6	1	2	2	10	6	7	3	4	6	7	2	17	5	1	117
OG0000268	5	7	1	2	27	0	2	1	4	3	14	3	13	1	5	6	2	6	3	0	11	0	116
OG0000269	28	14	3	0	0	2	4	0	0	0	23	0	8	15	0	1	0	14	0	0	4	0	116
OG0000270	6	4	4	5	8	2	9	5	4	4	4	6	7	6	8	4	4	7	2	9	5	3	116
OG0000271	4	5	9	5	11	1	6	4	6	8	6	4	7	7	3	7	5	4	3	7	0	4	116
OG0000272	20	3	7	2	9	9	2	9	4	2	1	10	3	5	6	5	2	3	2	1	7	3	115
OG0000273	8	12	1	4	9	2	4	5	8	3	14	8	6	1	4	6	4	12	1	1	1	1	115
OG0000274	2	20	4	2	4	1	0	3	10	7	1	3	23	6	2	4	9	4	2	6	2	0	115
OG0000275	10	17	5	1	5	0	0	0	11	8	1	0	16	0	3	8	4	1	13	0	6	6	115
OG0000276	2	6	6	4	8	2	5	9	7	4	5	9	5	5	3	8	2	1	3	12	6	3	115
OG0000277	6	8	11	1	3	8	2	4	4	2	7	5	9	10	3	8	4	9	1	2	5	3	115
OG0000278	4	5	9	2	5	2	8	7	7	6	5	6	6	3	8	5	4	6	4	3	6	4	115
OG0000279	2	0	4	0	9	9	20	0	6	8	6	0	5	35	4	1	4	0	0	0	2	0	115
OG0000280	1	3	5	0	4	2	0	0	7	9	7	0	6	58	0	4	6	0	3	0	0	0	115
OG0000281	1	7	3	1	12	6	3	3	4	8	3	3	9	5	3	4	2	23	3	4	3	5	115
OG0000282	0	1	0	0	0	0	0	0	0	0	0	0	114	0	0	0	0	0	0	0	0	0	115
OG0000283	5	7	4	2	5	3	4	5	7	5	5	6	7	11	2	5	7	4	4	6	2	8	114
OG0000284	0	0	12	0	3	13	59	0	0	0	2	0	3	3	10	0	0	1	0	5	3	0	114
OG0000285	7	5	7	3	4	12	2	5	5	2	3	3	4	8	1	5	10	8	3	9	6	1	113
OG0000286	2	4	13	3	6	4	4	7	3	4	4	9	7	6	2	13	1	9	3	0	7	2	113
OG0000287	4	9	7	1	2	15	0	1	18	7	0	2	5	2	1	9	2	15	3	0	1	9	113
OG0000288	13	5	0	0	2	0	0	3	8	1	0	1	8	0	61	3	4	4	0	0	0	0	113
OG0000289	5	5	6	2	9	1	5	3	9	3	5	11	8	7	2	7	8	5	0	10	2	0	113
OG0000290	0	0	0	0	0	0	0	0	0	0	0	0	0	0	0	0	0	0	0	113	0	0	113
OG0000291	16	1	3	2	15	2	3	9	2	1	2	11	2	0	0	1	0	33	0	6	2	1	112
OG0000292	4	6	3	3	7	3	7	2	7	4	8	3	4	8	8	6	6	4	2	9	5	3	112
OG0000293	11	11	14	2	6	1	4	4	4	5	5	12	5	5	4	2	5	8	0	0	0	4	112
OG0000294	4	0	5	0	0	0	0	0	3	0	1	0	2	11	2	1	11	62	0	0	8	2	112
OG0000295	0	0	0	0	0	0	112	0	0	0	0	0	0	0	0	0	0	0	0	0	0	0	112
OG0000296	0	0	0	0	0	0	0	0	0	0	111	0	0	0	0	0	0	0	0	0	1	0	112
OG0000297	3	5	4	6	5	5	5	6	6	5	5	6	4	6	6	4	5	5	6	4	6	4	111
OG0000298	2	3	6	4	13	3	7	5	4	8	4	4	4	6	2	4	9	3	3	9	5	3	111
OG0000299	0	0	0	0	3	0	108	0	0	0	0	0	0	0	0	0	0	0	0	0	0	0	111
OG0000300	4	3	4	0	11	0	8	11	2	4	2	14	4	4	10	2	3	2	2	15	3	2	110
OG0000301	2	0	20	0	6	3	0	0	5	2	3	3	0	34	6	0	5	7	2	0	5	7	110
OG0000302	4	5	9	5	6	3	4	4	9	9	2	4	3	5	1	7	7	10	2	5	4	1	109
OG0000303	5	4	4	4	7	3	7	8	6	3	2	8	4	6	3	5	7	3	2	10	4	4	109
OG0000304	8	8	9	3	0	4	0	3	3	1	4	3	4	8	0	25	5	12	0	2	7	0	109
OG0000305	2	5	8	4	4	0	3	6	6	5	5	1	6	6	3	4	4	7	2	10	11	7	109
OG0000306	1	11	1	2	22	0	3	1	11	5	11	2	9	7	4	3	1	3	0	6	6	0	109
OG0000307	5	1	11	1	0	3	0	2	3	4	8	2	5	0	0	21	0	32	2	0	8	1	109
OG0000308	0	0	106	0	0	0	0	0	0	0	3	0	0	0	0	0	0	0	0	0	0	0	109
OG0000309	0	0	29	0	9	3	2	0	0	0	4	1	0	37	8	0	0	2	0	0	14	0	109
OG0000310	0	0	0	0	0	0	0	0	0	0	0	0	0	0	0	0	0	109	0	0	0	0	109
OG0000311	3	3	5	4	6	5	4	8	3	3	7	9	3	9	6	4	5	4	3	7	4	3	108
OG0000312	1	7	9	3	5	1	7	3	1	25	1	2	16	11	1	1	1	1	4	5	2	1	108
OG0000313	0	0	3	0	0	0	0	0	0	0	1	0	0	103	0	0	0	0	0	0	1	0	108
OG0000314	16	7	2	4	0	1	1	2	4	4	27	4	11	0	6	3	5	8	0	0	1	1	107
OG0000315	5	0	16	0	3	46	1	0	0	5	0	1	3	18	1	0	1	0	4	0	3	0	107
OG0000316	0	0	0	0	1	0	106	0	0	0	0	0	0	0	0	0	0	0	0	0	0	0	107
OG0000317	55	0	0	0	0	6	0	0	3	0	3	0	0	0	4	0	0	0	0	0	35	0	106
OG0000318	11	6	4	0	7	3	4	6	6	6	5	6	2	5	2	3	6	2	5	12	2	3	106
OG0000319	5	3	3	4	2	2	0	5	3	5	6	5	4	16	13	7	4	7	1	4	5	2	106
OG0000320	0	0	0	0	0	106	0	0	0	0	0	0	0	0	0	0	0	0	0	0	0	0	106
OG0000321	0	0	0	0	0	0	0	0	0	0	0	0	0	0	0	0	0	106	0	0	0	0	106
OG0000322	0	0	0	0	0	0	0	0	0	0	0	0	0	0	0	0	0	0	106	0	0	0	106
OG0000323	4	5	3	3	10	7	5	5	4	5	5	6	3	12	3	3	3	5	1	5	5	3	105
OG0000324	5	3	0	5	5	0	0	1	6	0	56	1	4	0	0	14	2	0	0	0	3	0	105
OG0000325	1	8	9	11	3	2	6	0	4	3	27	0	4	9	0	4	2	1	0	11	0	0	105
OG0000326	4	7	7	8	6	2	0	0	12	7	6	0	8	7	4	5	7	6	0	4	5	0	105
OG0000327	3	3	6	4	11	5	8	7	4	3	5	7	3	4	6	3	3	4	4	6	3	3	105
OG0000328	0	1	5	2	14	0	5	0	3	3	12	0	3	34	1	7	1	0	0	14	0	0	105
OG0000329	16	0	1	0	0	1	0	0	16	4	1	0	1	3	20	0	24	2	0	0	15	0	104
OG0000330	0	0	3	13	21	0	4	0	5	0	6	0	0	8	0	25	0	0	1	8	0	10	104
OG0000331	0	0	0	0	0	0	0	0	0	0	0	0	0	0	0	0	0	0	0	104	0	0	104
OG0000332	7	5	4	2	3	0	0	3	15	3	1	4	3	17	2	9	6	6	1	2	10	0	103
OG0000333	33	6	5	3	2	0	1	3	9	2	2	9	6	0	0	1	4	9	0	0	8	0	103
OG0000334	8	4	7	3	2	3	3	6	2	4	2	8	4	10	1	6	4	3	4	5	10	4	103
OG0000335	4	9	3	0	0	0	0	0	6	7	3	0	6	39	1	2	2	12	6	0	3	0	103
OG0000336	1	6	3	5	20	0	7	4	8	3	10	4	5	2	2	4	2	3	6	2	4	2	103
OG0000337	5	3	6	3	2	2	3	8	7	4	7	8	5	7	2	5	6	3	8	0	1	8	103
OG0000338	1	1	13	4	1	1	1	2	1	1	8	2	3	31	1	7	0	4	0	20	1	0	103
OG0000339	3	11	2	4	5	3	2	2	4	4	4	2	9	6	4	2	2	6	3	7	15	3	103
OG0000340	0	0	0	0	0	0	0	0	0	0	0	0	0	0	0	0	0	0	0	103	0	0	103
OG0000341	4	5	7	3	6	7	6	6	5	8	2	5	3	7	3	2	6	6	2	2	3	4	102
OG0000342	5	4	4	4	12	3	3	8	4	4	4	7	4	4	4	3	3	4	3	8	4	3	102
OG0000343	14	4	13	2	3	6	10	1	0	21	0	1	3	1	10	7	0	1	1	0	3	1	102
OG0000344	1	3	2	3	20	6	8	5	4	2	1	3	2	5	1	2	3	2	2	20	3	3	101
OG0000345	0	12	14	3	1	0	0	0	6	0	35	0	4	4	3	7	3	8	1	0	0	0	101
OG0000346	0	0	0	0	0	0	0	0	0	0	0	0	0	0	0	0	0	0	101	0	0	0	101
OG0000347	13	3	4	1	2	3	0	0	17	7	1	0	13	10	1	7	8	3	2	1	3	1	100
OG0000348	0	11	4	3	22	0	10	0	4	9	3	0	7	3	0	4	3	0	2	11	0	4	100
OG0000349	0	0	0	0	99	0	0	0	0	0	0	0	0	0	0	0	0	0	0	1	0	0	100
OG0000350	23	8	3	1	2	3	1	0	5	11	2	0	6	9	2	7	5	3	0	0	8	0	99
OG0000351	3	4	7	2	15	3	5	4	4	3	5	4	3	7	7	4	6	4	1	4	4	0	99
OG0000352	17	1	4	1	9	0	0	2	7	6	0	3	4	3	2	4	6	12	0	0	9	9	99
OG0000353	7	5	9	2	7	2	5	4	2	5	10	3	4	5	0	4	4	5	4	1	8	2	98
OG0000354	1	4	5	2	7	0	2	2	3	6	12	3	9	7	3	11	4	13	1	0	2	1	98
OG0000355	6	5	4	2	6	1	4	4	6	5	3	1	5	8	8	5	4	3	2	10	3	3	98
OG0000356	8	4	4	1	7	1	2	4	11	3	4	5	6	4	0	3	3	4	5	8	7	4	98
OG0000357	9	5	13	1	1	0	1	0	8	8	4	1	6	3	2	9	3	5	8	2	8	1	98
OG0000358	1	3	4	2	8	3	3	2	2	3	2	2	3	8	2	3	2	3	4	33	4	1	98
OG0000359	2	4	4	7	8	4	9	5	5	2	4	6	6	3	2	4	4	4	3	8	2	2	98
OG0000360	9	3	3	2	15	1	5	9	5	2	8	11	3	2	5	3	4	3	1	2	1	0	97
OG0000361	2	3	5	2	5	4	2	6	5	3	4	5	4	9	9	9	6	3	2	2	3	4	97
OG0000362	2	5	0	0	2	0	0	0	8	13	6	0	6	4	1	4	5	37	0	0	3	1	97
OG0000363	4	4	5	2	3	4	2	7	6	4	3	10	4	7	7	4	4	3	5	6	1	2	97
OG0000364	9	5	4	1	6	1	1	9	5	4	2	6	9	6	2	5	7	5	3	0	4	3	97
OG0000365	2	10	8	6	15	0	6	0	12	5	7	0	4	2	0	8	1	0	4	4	0	3	97
OG0000366	2	4	5	3	10	2	7	8	3	6	4	6	7	4	9	5	3	1	2	2	1	3	97
OG0000367	7	2	0	0	21	0	1	0	6	1	2	0	7	24	0	1	3	6	1	0	15	0	97
OG0000368	0	5	9	5	10	0	6	0	12	4	8	5	4	9	3	10	1	0	2	2	0	2	97
OG0000369	8	4	6	6	9	2	6	3	5	2	6	3	3	2	1	3	6	5	3	8	2	3	96
OG0000370	3	3	5	3	12	3	9	5	3	3	3	7	3	5	5	3	3	3	3	6	3	3	96
OG0000371	0	0	0	0	0	0	0	0	1	0	0	0	0	0	1	0	0	2	0	0	92	0	96
OG0000372	3	9	9	5	10	2	3	2	7	5	4	2	6	3	2	3	6	5	2	0	3	4	95
OG0000373	6	4	1	2	9	4	8	7	1	3	2	6	3	10	3	3	4	4	2	8	3	2	95
OG0000374	1	10	8	5	5	0	4	2	6	11	2	2	10	3	8	5	3	2	1	1	3	3	95
OG0000375	4	3	6	4	6	6	5	2	3	5	6	3	4	5	4	4	5	6	3	3	4	4	95
OG0000376	0	0	0	0	0	0	0	0	0	95	0	0	0	0	0	0	0	0	0	0	0	0	95
OG0000377	0	0	0	0	0	0	0	0	0	0	95	0	0	0	0	0	0	0	0	0	0	0	95
OG0000378	3	5	3	2	4	3	4	8	5	5	5	8	4	4	4	3	7	5	2	5	5	0	94
OG0000379	0	0	0	0	0	0	94	0	0	0	0	0	0	0	0	0	0	0	0	0	0	0	94
OG0000380	13	6	12	4	10	0	2	0	3	3	5	0	8	3	0	10	3	10	0	0	1	0	93
OG0000381	6	3	17	2	6	0	10	0	2	12	3	0	3	10	5	6	0	0	1	1	4	2	93
OG0000382	5	2	5	4	9	7	3	0	7	4	9	0	2	6	2	5	5	7	0	3	8	0	93
OG0000383	8	7	6	1	6	0	0	1	4	6	10	1	6	7	0	8	1	3	5	6	3	4	93
OG0000384	14	0	5	0	0	0	0	0	5	1	3	1	4	35	0	0	6	16	0	0	3	0	93
OG0000385	6	2	5	3	3	0	4	2	4	5	6	2	4	6	6	5	3	6	3	5	7	6	93
OG0000386	9	5	10	3	5	7	1	1	3	6	6	1	4	10	2	1	5	4	3	0	2	5	93
OG0000387	0	4	20	7	28	0	8	0	1	1	7	0	2	2	0	9	3	0	0	1	0	0	93
OG0000388	13	5	3	1	4	2	0	4	3	4	6	4	3	4	6	3	1	8	0	1	17	0	92
OG0000389	11	3	3	0	5	0	2	1	10	7	11	5	5	0	0	11	5	6	1	0	4	2	92
OG0000390	2	0	0	0	0	0	87	0	1	0	0	0	0	0	2	0	0	0	0	0	0	0	92
OG0000391	1	1	11	6	15	0	1	0	13	1	22	0	2	0	0	11	1	1	3	0	3	0	92
OG0000392	0	0	0	0	92	0	0	0	0	0	0	0	0	0	0	0	0	0	0	0	0	0	92
OG0000393	0	0	0	0	0	0	0	0	0	0	0	0	0	0	0	0	0	0	0	92	0	0	92
OG0000394	6	2	7	2	8	2	3	2	4	2	2	2	3	5	1	2	2	1	6	1	1	27	91
OG0000395	5	2	2	2	14	3	8	10	2	2	3	4	2	4	3	3	3	1	3	11	1	3	91
OG0000396	2	5	5	3	5	0	2	2	4	3	15	3	6	7	3	5	5	6	2	3	3	2	91
OG0000397	0	14	6	2	6	0	2	0	1	1	5	0	12	8	0	18	1	2	4	0	0	9	91
OG0000398	0	0	8	0	0	30	0	0	9	4	10	0	0	10	4	3	8	4	0	0	1	0	91
OG0000399	21	0	0	0	0	0	0	5	7	0	0	5	0	0	30	0	0	16	5	0	0	1	90
OG0000400	3	4	4	7	12	5	8	2	2	2	2	4	4	6	2	2	4	2	2	3	9	1	90
OG0000401	2	2	19	0	0	1	8	0	0	10	1	0	1	0	2	39	0	2	0	1	0	2	90
OG0000402	3	8	3	3	2	6	3	1	2	3	15	2	3	8	3	2	3	3	2	3	12	0	90
OG0000403	4	2	3	2	6	7	6	5	4	3	4	5	3	5	6	3	5	5	2	3	4	3	90
OG0000404	3	3	4	2	5	6	3	5	7	4	2	4	7	3	4	5	6	8	2	4	1	2	90
OG0000405	9	2	2	3	3	4	2	1	2	5	8	1	3	2	5	7	3	5	15	1	4	3	90
OG0000406	2	1	2	2	14	5	12	4	3	1	4	6	1	3	2	3	2	2	3	13	3	2	90
OG0000407	0	0	19	0	0	0	5	0	2	0	14	0	0	45	0	0	5	0	0	0	0	0	90
OG0000408	6	4	4	5	4	2	2	4	6	3	3	3	4	7	3	3	3	3	2	10	6	2	89
OG0000409	12	2	0	0	0	0	0	8	15	1	0	1	4	3	9	4	4	5	4	1	15	1	89
OG0000410	1	5	4	1	16	1	8	5	2	5	5	6	3	9	2	3	3	4	3	0	1	2	89
OG0000411	5	3	6	3	2	2	2	2	17	2	5	1	7	7	2	6	4	4	2	3	2	2	89
OG0000412	2	1	2	4	24	3	10	7	2	1	1	4	1	4	3	1	1	1	5	6	1	5	89
OG0000413	0	11	1	1	11	0	5	0	3	12	1	0	11	2	0	2	1	1	9	0	1	17	89
OG0000414	87	0	0	0	0	1	0	0	0	0	0	0	0	0	0	0	0	0	0	0	0	0	88
OG0000415	11	3	8	0	1	2	0	0	7	9	3	2	3	8	6	9	7	2	0	1	6	0	88
OG0000416	11	2	6	0	2	8	0	0	13	5	7	0	4	2	6	5	3	13	0	0	1	0	88
OG0000417	5	2	6	4	3	3	2	6	3	4	4	6	4	3	9	4	5	3	5	2	2	3	88
OG0000418	8	5	2	2	6	4	2	1	4	5	2	3	4	12	6	4	5	4	0	2	6	1	88
OG0000419	3	3	6	2	8	2	3	1	3	4	17	2	9	1	1	8	3	3	2	3	3	1	88
OG0000420	2	4	17	0	1	0	1	1	6	5	2	1	16	9	0	9	0	0	0	0	14	0	88
OG0000421	3	4	4	5	5	2	2	2	5	4	5	2	4	6	6	4	4	4	4	5	4	4	88
OG0000422	29	3	5	2	11	0	3	2	1	1	3	4	4	2	3	2	2	1	2	6	0	1	87
OG0000423	11	11	1	2	0	4	0	1	2	7	9	1	12	0	10	7	2	4	1	1	0	1	87
OG0000424	31	4	12	0	0	0	10	2	0	4	6	2	2	5	1	5	0	2	0	0	1	0	87
OG0000425	5	2	3	1	1	7	1	5	3	2	1	5	2	3	1	3	4	21	7	0	1	9	87
OG0000426	5	6	2	2	5	0	1	8	4	7	6	7	3	1	6	1	2	6	2	0	3	10	87
OG0000427	3	3	5	3	4	4	5	4	4	3	3	3	4	6	4	3	3	10	2	3	4	4	87
OG0000428	1	0	2	0	3	0	0	0	4	0	3	0	3	45	8	0	1	0	0	0	5	12	87
OG0000429	7	3	8	1	3	2	10	3	5	6	2	3	3	4	6	2	3	2	3	4	5	1	86
OG0000430	7	6	8	2	7	2	0	1	2	3	0	2	5	8	5	4	0	13	3	7	1	0	86
OG0000431	4	5	5	5	4	4	3	5	3	5	3	3	5	9	4	4	2	3	2	2	3	3	86
OG0000432	2	2	7	0	2	14	2	4	4	7	0	3	2	2	5	0	3	4	0	18	2	3	86
OG0000433	3	3	5	4	4	3	3	5	6	3	3	5	3	5	5	5	4	3	2	6	3	3	86
OG0000434	2	2	8	7	7	2	1	4	4	2	7	1	3	4	3	4	3	7	1	3	10	1	86
OG0000435	0	14	2	1	2	0	0	0	14	8	6	0	13	0	2	9	2	0	4	0	0	9	86
OG0000436	0	41	0	0	0	0	0	0	1	0	1	1	12	0	0	1	0	29	0	0	0	0	86
OG0000437	0	0	86	0	0	0	0	0	0	0	0	0	0	0	0	0	0	0	0	0	0	0	86
OG0000438	0	0	1	0	0	0	0	0	0	0	0	0	0	0	0	0	0	85	0	0	0	0	86
OG0000439	0	0	0	0	86	0	0	0	0	0	0	0	0	0	0	0	0	0	0	0	0	0	86
OG0000440	0	0	0	0	86	0	0	0	0	0	0	0	0	0	0	0	0	0	0	0	0	0	86
OG0000441	2	2	4	6	8	3	4	3	3	9	6	2	6	5	4	4	2	2	2	4	2	2	85
OG0000442	3	3	3	4	6	4	4	2	3	3	5	2	4	6	2	6	5	3	3	3	5	6	85
OG0000443	85	0	0	0	0	0	0	0	0	0	0	0	0	0	0	0	0	0	0	0	0	0	85
OG0000444	3	1	1	2	11	2	8	4	4	1	3	4	1	5	0	2	3	8	6	11	1	4	85
OG0000445	3	2	2	2	9	7	7	7	3	2	1	5	4	2	3	2	3	4	2	11	2	2	85
OG0000446	10	9	4	0	4	0	3	11	3	7	2	14	5	1	0	1	1	1	2	4	0	3	85
OG0000447	0	0	8	0	43	0	26	0	1	1	4	0	0	1	0	0	0	0	0	0	1	0	85
OG0000448	0	0	0	0	0	0	0	0	0	0	0	0	0	0	0	0	0	85	0	0	0	0	85
OG0000449	13	4	4	0	2	0	3	3	4	3	5	1	3	6	7	8	5	4	4	0	3	2	84
OG0000450	5	2	6	2	5	6	19	0	4	8	7	0	3	0	4	3	2	3	1	0	3	1	84
OG0000451	5	10	1	1	5	7	2	4	5	5	1	5	10	3	3	2	1	6	1	1	5	1	84
OG0000452	3	8	5	5	4	1	5	1	4	8	3	2	10	4	4	3	3	4	1	4	1	1	84
OG0000453	3	0	0	0	0	0	0	0	5	10	0	0	3	9	2	2	0	30	4	0	11	5	84
OG0000454	1	7	7	3	1	0	0	0	19	6	5	0	12	0	3	2	6	0	6	0	0	6	84
OG0000455	0	1	3	8	12	4	18	2	2	1	2	2	1	7	1	5	1	1	2	9	1	1	84
OG0000456	0	0	0	0	0	0	0	0	1	0	0	0	0	0	0	0	0	0	0	0	83	0	84
OG0000457	1	10	17	4	9	0	1	0	4	10	9	0	7	1	0	6	0	0	1	2	0	1	83
OG0000458	7	4	4	3	8	3	4	6	3	4	3	6	3	5	5	2	2	2	1	4	3	1	83
OG0000459	7	0	4	2	3	3	0	2	7	1	2	2	0	7	6	4	2	15	1	1	13	1	83
OG0000460	1	3	1	4	14	2	5	3	2	1	2	3	3	10	2	1	1	1	1	17	4	2	83
OG0000461	6	5	9	2	2	12	1	2	2	1	2	1	8	6	2	1	4	7	1	1	6	2	83
OG0000462	6	2	0	1	0	2	0	2	18	3	3	1	11	4	1	10	0	3	0	6	10	0	83
OG0000463	3	4	3	3	6	4	9	6	4	4	3	7	4	6	1	1	2	1	2	7	1	2	83
OG0000464	4	1	1	0	0	0	0	0	2	0	0	0	0	72	0	2	0	1	0	0	0	0	83
OG0000465	0	1	7	1	3	0	1	0	10	2	4	0	1	23	0	2	2	0	0	26	0	0	83
OG0000466	0	0	0	83	0	0	0	0	0	0	0	0	0	0	0	0	0	0	0	0	0	0	83
OG0000467	10	7	3	2	1	0	1	0	9	2	0	0	17	5	1	12	8	3	0	0	1	0	82
OG0000468	2	4	4	4	2	1	2	0	8	5	9	1	5	7	3	5	5	5	1	5	4	0	82
OG0000469	2	3	4	3	2	0	2	5	8	4	13	4	5	7	3	3	4	3	2	2	1	2	82
OG0000470	4	2	1	1	15	4	10	4	2	1	2	4	1	4	3	1	1	1	1	18	1	1	82
OG0000471	2	7	13	3	6	1	2	1	5	1	15	3	4	6	5	1	0	7	0	0	0	0	82
OG0000472	0	6	5	7	7	0	0	0	7	2	7	0	7	7	1	6	4	2	0	11	3	0	82
OG0000473	5	7	1	1	2	1	0	2	4	5	3	6	7	2	12	4	3	4	1	1	6	4	81
OG0000474	1	3	4	2	3	5	2	6	7	3	3	6	5	5	2	3	2	6	2	9	2	0	81
OG0000475	5	6	2	2	3	3	1	1	8	4	2	1	10	9	6	5	4	2	0	3	4	0	81
OG0000476	2	3	3	3	8	2	7	5	2	3	3	5	3	3	6	2	4	2	6	4	3	2	81
OG0000477	2	3	4	2	6	4	3	4	3	2	2	5	2	6	3	2	2	4	4	14	2	2	81
OG0000478	2	3	3	3	5	3	4	7	3	3	4	8	3	4	3	4	3	3	5	3	2	3	81
OG0000479	7	3	2	2	2	7	3	2	2	2	7	3	1	3	5	1	2	1	2	20	2	2	81
OG0000480	0	0	81	0	0	0	0	0	0	0	0	0	0	0	0	0	0	0	0	0	0	0	81
OG0000481	4	2	11	0	2	0	0	0	7	1	14	2	4	1	2	12	4	2	9	0	3	0	80
OG0000482	11	2	11	2	1	0	1	5	5	1	1	2	3	4	3	6	3	10	1	0	8	0	80
OG0000483	2	4	5	3	6	4	6	6	3	4	3	6	4	4	1	3	3	2	4	1	2	4	80
OG0000484	2	5	4	2	4	2	2	5	4	4	4	7	2	3	9	2	4	3	3	5	1	3	80
OG0000485	2	0	1	0	6	10	0	1	8	2	0	0	1	21	0	1	3	7	4	7	5	0	79
OG0000486	10	3	2	0	1	0	4	1	11	1	5	1	2	8	1	10	2	9	0	0	6	2	79
OG0000487	2	2	3	6	1	1	1	2	11	2	7	1	3	2	0	8	9	2	2	4	9	1	79
OG0000488	4	5	4	4	3	2	2	6	4	3	2	9	2	3	5	3	2	7	2	1	4	2	79
OG0000489	19	4	1	3	0	0	0	2	3	1	11	2	7	3	4	7	7	4	0	0	1	0	79
OG0000490	2	1	1	4	5	11	2	14	2	1	2	15	1	1	7	1	1	3	1	3	0	1	79
OG0000491	5	5	5	3	3	13	4	0	2	5	4	0	3	1	3	4	2	9	0	7	1	0	79
OG0000492	13	6	12	2	1	0	2	0	3	6	3	0	9	0	0	22	0	0	0	0	0	0	79
OG0000493	2	6	5	4	8	1	2	1	6	3	4	1	6	5	1	6	3	6	2	3	3	1	79
OG0000494	1	3	4	2	5	3	3	5	6	4	3	6	5	7	1	4	2	3	3	7	1	1	79
OG0000495	4	2	3	2	9	2	9	8	2	2	3	9	2	4	4	2	2	2	2	2	2	2	79
OG0000496	1	2	0	0	0	0	0	0	15	3	0	0	12	40	1	1	0	2	0	0	2	0	79
OG0000497	0	8	0	0	0	0	0	0	0	4	0	0	67	0	0	0	0	0	0	0	0	0	79
OG0000498	0	2	5	1	7	2	6	13	1	3	2	11	2	3	2	2	3	2	2	7	2	1	79
OG0000499	0	0	79	0	0	0	0	0	0	0	0	0	0	0	0	0	0	0	0	0	0	0	79
OG0000500	0	0	79	0	0	0	0	0	0	0	0	0	0	0	0	0	0	0	0	0	0	0	79
OG0000501	8	1	11	1	3	1	0	0	9	1	1	0	2	18	9	1	0	0	2	0	10	0	78
OG0000502	3	34	0	0	0	0	0	0	4	1	0	1	31	0	1	0	0	3	0	0	0	0	78
OG0000503	3	2	4	3	4	3	3	3	12	2	2	2	2	11	6	2	6	2	0	4	1	1	78
OG0000504	8	1	1	0	3	3	0	0	4	2	13	0	2	4	7	5	5	3	2	5	9	1	78
OG0000505	3	1	3	2	10	2	7	10	2	1	2	10	1	2	4	5	1	4	1	0	4	3	78
OG0000506	3	6	1	3	10	1	2	0	3	6	2	0	5	2	0	2	2	26	1	2	1	0	78
OG0000507	5	7	4	4	2	1	0	6	4	2	3	7	2	8	4	1	4	2	4	2	4	2	78
OG0000508	12	4	0	0	0	0	0	0	0	0	0	0	0	43	4	1	3	8	0	0	3	0	78
OG0000509	1	3	2	2	17	4	8	3	1	4	4	4	1	6	0	1	1	1	2	11	1	1	78
OG0000510	1	1	8	3	4	12	0	10	4	3	2	9	2	4	3	2	3	1	2	2	0	2	78
OG0000511	4	2	4	0	0	1	0	0	8	6	0	0	16	11	5	1	1	0	10	0	6	3	78
OG0000512	0	1	0	0	19	0	57	0	0	1	0	0	0	0	0	0	0	0	0	0	0	0	78
OG0000513	3	3	5	4	3	5	3	3	4	4	4	4	3	5	1	3	3	3	3	4	4	3	77
OG0000514	7	2	5	0	2	0	29	0	1	1	1	2	2	0	12	4	0	2	2	3	2	0	77
OG0000515	2	4	5	2	3	1	1	3	5	3	4	4	3	13	1	2	5	4	7	0	1	4	77
OG0000516	19	0	0	0	0	1	0	0	8	0	0	0	0	21	0	0	8	16	2	0	2	0	77
OG0000517	3	2	2	1	5	6	4	6	2	3	2	6	3	5	4	2	2	5	1	9	2	2	77
OG0000518	3	2	3	3	6	2	11	4	4	2	6	4	3	2	3	2	2	2	4	4	1	4	77
OG0000519	2	3	0	0	0	0	0	0	2	3	3	0	0	60	0	2	1	1	0	0	0	0	77
OG0000520	1	0	0	0	5	53	1	0	1	0	0	1	0	6	0	0	0	0	2	7	0	0	77
OG0000521	0	0	77	0	0	0	0	0	0	0	0	0	0	0	0	0	0	0	0	0	0	0	77
OG0000522	76	0	0	0	0	0	0	0	0	0	0	0	0	0	0	0	0	0	0	0	0	0	76
OG0000523	6	9	5	1	1	0	1	2	3	4	1	1	3	7	3	3	4	5	2	4	6	5	76
OG0000524	17	0	0	0	0	0	0	0	19	1	3	0	20	8	1	1	1	1	0	0	4	0	76
OG0000525	5	1	2	5	14	0	5	0	8	2	0	3	4	2	0	1	3	8	0	9	4	0	76
OG0000526	4	4	4	2	5	2	3	7	4	4	3	6	4	2	3	2	3	3	1	4	4	2	76
OG0000527	7	0	3	0	5	3	2	3	0	0	0	4	0	4	1	0	0	0	0	43	1	0	76
OG0000528	7	2	6	1	1	1	4	2	7	3	5	2	4	5	4	5	3	6	2	2	2	2	76
OG0000529	7	4	11	0	3	1	2	3	4	3	5	2	2	2	3	2	3	2	4	6	4	3	76
OG0000530	3	3	2	2	4	3	3	4	9	3	3	2	5	5	2	2	3	3	2	5	4	4	76
OG0000531	0	9	7	0	5	0	0	0	4	4	1	0	3	22	1	0	2	16	0	0	0	2	76
OG0000532	0	0	0	0	0	0	0	0	0	0	76	0	0	0	0	0	0	0	0	0	0	0	76
OG0000533	0	0	0	0	0	0	0	0	0	0	0	76	0	0	0	0	0	0	0	0	0	0	76
OG0000534	2	28	1	0	0	0	0	8	1	4	0	11	10	0	5	1	1	0	1	0	2	0	75
OG0000535	4	5	5	8	2	1	7	5	4	6	4	6	4	2	0	3	0	3	1	2	2	1	75
OG0000536	10	6	0	0	0	0	0	0	7	2	23	0	3	5	0	11	6	2	0	0	0	0	75
OG0000537	5	4	1	1	2	5	1	4	5	4	7	5	5	6	2	1	4	5	0	2	6	0	75
OG0000538	4	4	4	1	9	0	2	6	2	6	1	8	7	1	0	2	2	1	2	8	1	4	75
OG0000539	4	4	3	1	2	3	4	3	1	4	4	4	5	9	4	4	5	2	0	7	0	2	75
OG0000540	3	2	2	3	5	1	4	4	3	2	5	4	3	3	9	2	2	3	2	9	2	2	75
OG0000541	9	4	1	0	0	0	0	2	3	4	0	4	14	1	0	0	12	8	5	0	4	4	75
OG0000542	3	3	5	3	7	0	1	1	2	1	1	1	1	16	0	4	2	4	0	2	4	14	75
OG0000543	1	4	2	1	2	0	1	1	11	1	13	1	2	11	3	2	1	11	3	1	3	0	75
OG0000544	1	1	13	2	1	0	1	1	2	2	3	1	1	9	0	8	8	3	1	0	17	0	75
OG0000545	1	0	7	1	35	0	7	0	8	2	7	0	2	2	0	1	1	0	0	0	1	0	75
OG0000546	0	3	10	6	21	0	8	0	3	4	9	0	3	1	2	3	1	0	0	1	0	0	75
OG0000547	0	20	1	0	5	0	1	0	7	2	2	0	30	0	4	3	0	0	0	0	0	0	75
OG0000548	0	1	6	0	0	3	43	0	0	0	0	0	0	0	0	0	0	0	0	21	0	1	75
OG0000549	0	0	6	2	3	8	2	1	0	0	13	1	0	0	1	13	0	1	0	7	17	0	75
OG0000550	0	0	75	0	0	0	0	0	0	0	0	0	0	0	0	0	0	0	0	0	0	0	75
OG0000551	0	0	13	0	0	0	0	0	0	8	0	0	0	35	6	0	9	0	1	0	0	3	75
OG0000552	0	0	0	0	0	0	0	0	0	0	0	0	75	0	0	0	0	0	0	0	0	0	75
OG0000553	29	1	0	0	0	0	0	0	4	9	0	0	0	14	1	0	0	16	0	0	0	0	74
OG0000554	3	3	7	3	4	4	2	2	4	5	8	2	3	5	3	2	4	2	2	4	1	1	74
OG0000555	4	6	5	5	8	0	2	4	4	3	3	4	3	8	2	2	1	2	2	0	1	5	74
OG0000556	1	9	2	4	0	0	0	0	9	5	20	0	8	2	0	4	6	2	1	0	0	1	74
OG0000557	5	1	1	2	7	3	2	10	3	4	2	4	7	5	2	2	3	4	0	3	2	2	74
OG0000558	3	5	7	3	5	0	3	1	7	2	1	4	2	6	1	3	4	10	3	0	4	0	74
OG0000559	5	4	8	4	1	1	0	1	3	4	5	3	4	8	4	5	4	2	3	1	3	1	74
OG0000560	2	8	2	1	1	1	0	6	3	7	1	5	11	5	0	3	8	2	0	0	3	5	74
OG0000561	7	1	8	2	5	5	2	1	4	2	3	1	3	7	1	8	4	2	2	2	2	2	74
OG0000562	4	3	3	3	6	3	12	4	2	4	5	4	3	2	2	2	2	2	0	3	3	2	74
OG0000563	0	11	5	1	2	0	6	0	6	7	8	0	7	3	0	10	0	0	0	7	1	0	74
OG0000564	0	0	0	0	74	0	0	0	0	0	0	0	0	0	0	0	0	0	0	0	0	0	74
OG0000565	8	5	0	2	0	1	0	0	5	2	0	0	5	14	1	22	3	3	1	0	0	1	73
OG0000566	5	5	7	0	1	0	0	0	4	10	0	0	3	2	0	13	7	7	3	0	3	3	73
OG0000567	1	3	7	1	5	2	4	6	2	2	11	6	3	5	4	1	2	3	3	0	2	0	73
OG0000568	3	6	8	3	1	2	1	1	5	7	2	1	7	3	2	6	5	1	1	1	6	1	73
OG0000569	0	6	2	3	3	9	5	1	2	3	3	2	3	6	2	3	3	6	2	6	3	0	73
OG0000570	0	1	19	0	10	0	0	0	0	3	25	0	3	2	2	6	0	0	0	0	2	0	73
OG0000571	0	0	0	0	6	11	2	6	0	0	1	0	0	0	0	0	0	0	0	45	1	1	73
OG0000572	0	0	0	0	0	0	0	0	0	0	0	0	0	0	0	0	0	0	0	73	0	0	73
OG0000573	17	17	1	1	0	0	0	0	9	2	0	0	12	8	0	0	3	2	0	0	0	0	72
OG0000574	4	4	6	2	7	5	1	1	0	3	2	1	2	4	4	1	2	9	0	5	9	0	72
OG0000575	65	1	1	0	0	0	0	0	1	0	0	0	0	2	1	1	0	0	0	0	0	0	72
OG0000576	3	2	2	4	12	3	3	2	2	2	2	5	2	4	2	2	2	2	2	8	1	5	72
OG0000577	2	5	6	1	3	3	1	2	6	1	2	3	3	7	0	3	3	9	4	3	1	4	72
OG0000578	6	8	0	0	0	1	0	0	2	0	1	0	2	40	7	0	0	2	0	0	3	0	72
OG0000579	1	1	1	1	17	1	3	2	1	3	3	3	3	2	1	0	1	1	18	7	1	1	72
OG0000580	7	12	3	0	0	0	0	0	15	3	7	0	1	9	1	0	7	1	0	0	6	0	72
OG0000581	1	1	5	1	2	1	1	3	2	1	5	3	10	3	3	2	2	10	1	12	2	1	72
OG0000582	18	6	10	1	2	0	0	0	1	1	4	0	3	0	0	14	3	2	0	0	4	2	71
OG0000583	2	3	3	2	7	3	5	4	4	3	2	4	2	4	3	2	3	4	2	3	4	2	71
OG0000584	6	3	5	2	10	0	2	1	4	3	3	2	4	4	1	4	2	5	3	0	5	2	71
OG0000585	2	6	3	3	5	3	2	3	5	3	6	4	4	7	2	4	3	4	0	0	1	1	71
OG0000586	9	2	27	0	3	0	1	0	9	1	3	1	4	0	1	2	5	2	0	1	0	0	71
OG0000587	14	9	1	1	3	0	2	0	1	1	1	0	5	1	7	2	0	6	1	1	15	0	71
OG0000588	3	1	14	3	2	6	1	3	2	2	2	3	2	4	2	3	3	6	2	3	2	2	71
OG0000589	7	0	0	0	1	0	0	16	1	1	2	17	1	2	7	3	1	6	2	0	1	3	71
OG0000590	3	3	6	3	3	0	2	2	10	3	1	4	5	3	2	3	1	4	2	0	1	10	71
OG0000591	2	2	4	3	4	2	0	4	6	1	4	3	10	4	5	3	2	6	2	1	1	2	71
OG0000592	3	4	5	1	2	7	0	0	11	1	0	0	4	0	4	13	2	6	0	0	8	0	71
OG0000593	1	4	1	1	2	3	0	2	1	1	2	3	4	2	0	15	2	2	1	4	19	1	71
OG0000594	0	71	0	0	0	0	0	0	0	0	0	0	0	0	0	0	0	0	0	0	0	0	71
OG0000595	0	0	9	3	20	0	1	0	6	0	6	0	0	2	2	7	4	9	0	0	2	0	71
OG0000596	0	0	0	0	57	0	3	0	0	0	10	0	0	0	0	0	0	1	0	0	0	0	71
OG0000597	0	0	0	0	0	0	0	3	0	0	0	68	0	0	0	0	0	0	0	0	0	0	71
OG0000598	0	0	0	0	0	0	0	0	0	0	0	0	0	0	0	0	0	0	0	71	0	0	71
OG0000599	0	0	0	0	0	0	0	0	0	0	0	0	0	0	0	0	0	0	0	0	0	71	71
OG0000600	2	3	2	2	7	4	3	3	3	4	1	4	3	4	1	2	2	2	2	12	2	2	70
OG0000601	6	9	0	1	2	0	0	1	1	12	6	2	7	2	2	2	1	12	0	0	4	0	70
OG0000602	1	1	2	2	19	2	10	2	3	1	3	2	1	3	1	1	1	1	1	7	1	5	70
OG0000603	7	3	4	1	1	3	0	4	3	4	4	5	5	1	2	6	6	4	1	0	6	0	70
OG0000604	14	0	5	0	0	0	0	3	4	1	0	2	10	1	2	7	3	10	8	0	0	0	70
OG0000605	1	0	2	0	47	1	0	0	8	0	3	0	1	0	0	5	0	0	0	1	0	1	70
OG0000606	1	2	3	2	10	1	7	3	4	2	2	3	2	3	1	2	2	1	1	14	2	2	70
OG0000607	5	2	13	1	1	1	0	4	3	0	0	5	2	0	0	1	0	14	6	0	12	0	70
OG0000608	2	3	1	2	10	4	5	6	2	3	1	6	3	5	2	1	1	2	1	7	1	2	70
OG0000609	1	0	0	1	0	0	0	1	0	0	0	56	0	0	6	0	0	4	0	0	1	0	70
OG0000610	5	2	1	3	9	9	6	4	2	2	2	5	1	2	3	1	1	2	1	7	0	2	70
OG0000611	0	4	3	7	0	0	0	0	4	1	18	0	3	6	2	7	2	1	0	12	0	0	70
OG0000612	0	59	0	0	0	0	0	0	0	0	0	0	11	0	0	0	0	0	0	0	0	0	70
OG0000613	0	1	8	0	0	0	0	0	0	1	1	0	14	1	4	0	30	0	0	0	10	0	70
OG0000614	69	0	0	0	0	0	0	0	0	0	0	0	0	0	0	0	0	0	0	0	0	0	69
OG0000615	19	3	2	2	0	1	1	0	5	2	7	0	2	2	6	2	2	8	0	1	4	0	69
OG0000616	3	1	3	1	2	15	1	2	2	1	5	2	3	1	2	2	3	4	5	6	1	4	69
OG0000617	3	4	3	5	5	3	3	2	4	4	4	2	6	3	0	3	5	2	1	2	3	2	69
OG0000618	2	4	4	4	3	0	2	2	9	5	4	2	4	4	2	3	2	3	3	1	3	3	69
OG0000619	8	6	4	2	7	4	4	1	1	4	3	2	5	2	0	3	4	2	0	4	3	0	69
OG0000620	2	2	5	0	11	1	10	3	4	2	2	3	2	3	2	3	1	2	2	6	2	1	69
OG0000621	1	59	0	0	0	0	0	0	0	0	0	0	3	0	0	0	0	0	4	2	0	0	69
OG0000622	0	7	2	3	7	4	4	1	2	3	1	0	8	3	6	3	2	0	0	7	6	0	69
OG0000623	0	0	0	0	0	69	0	0	0	0	0	0	0	0	0	0	0	0	0	0	0	0	69
OG0000624	5	12	2	5	0	0	0	0	6	2	2	0	12	0	1	3	2	9	0	0	7	0	68
OG0000625	23	2	14	0	0	0	0	0	0	0	4	0	0	11	3	10	0	0	0	0	1	0	68
OG0000626	2	2	3	2	8	3	4	4	2	3	2	5	2	3	1	6	2	2	2	6	2	2	68
OG0000627	11	5	2	0	6	0	1	0	14	1	1	0	8	0	6	4	4	5	0	0	0	0	68
OG0000628	2	6	2	1	3	5	1	1	4	6	3	2	5	3	2	3	10	3	2	2	1	1	68
OG0000629	1	3	2	2	2	2	4	4	3	1	3	4	3	9	5	2	5	5	2	2	2	2	68
OG0000630	7	2	3	0	0	0	0	0	8	1	6	0	4	15	3	1	1	12	0	0	5	0	68
OG0000631	1	3	2	3	9	1	3	3	2	3	6	2	3	2	7	2	2	2	3	5	1	3	68
OG0000632	1	2	1	2	14	4	7	6	1	1	2	6	1	1	1	1	1	2	2	10	1	1	68
OG0000633	0	21	0	0	0	0	0	0	0	18	0	0	21	0	1	0	0	3	0	0	4	0	68
OG0000634	0	0	0	0	0	68	0	0	0	0	0	0	0	0	0	0	0	0	0	0	0	0	68
OG0000635	0	0	0	0	0	0	1	0	1	2	2	0	0	39	15	0	0	4	0	0	4	0	68
OG0000636	0	0	0	0	0	0	0	0	0	0	0	0	0	0	0	0	0	68	0	0	0	0	68
OG0000637	31	1	0	0	0	0	0	0	0	0	0	1	21	0	0	1	7	0	0	0	5	0	67
OG0000638	39	0	0	0	0	0	0	4	0	0	0	2	0	0	0	0	0	2	0	0	20	0	67
OG0000639	5	28	0	0	0	0	0	2	1	4	0	9	12	0	1	3	1	1	0	0	0	0	67
OG0000640	3	2	3	2	1	2	2	4	4	3	3	4	3	4	3	3	1	3	3	7	3	4	67
OG0000641	3	6	2	2	1	3	1	11	2	2	1	11	3	2	0	3	2	7	3	0	0	2	67
OG0000642	3	3	3	4	6	1	0	2	1	4	5	3	3	4	4	3	2	4	3	3	4	2	67
OG0000643	6	8	4	1	7	0	0	0	2	5	4	0	5	3	8	4	3	2	2	1	1	1	67
OG0000644	1	3	6	2	14	1	8	3	2	3	5	3	2	3	0	2	2	2	1	2	0	2	67
OG0000645	3	2	1	1	0	1	0	2	3	4	5	3	3	3	23	2	5	1	1	1	2	1	67
OG0000646	2	2	0	0	0	0	0	0	1	0	0	0	0	51	0	6	4	1	0	0	0	0	67
OG0000647	0	12	3	4	3	0	2	0	7	4	5	2	7	0	0	9	6	0	1	0	0	2	67
OG0000648	0	0	0	0	67	0	0	0	0	0	0	0	0	0	0	0	0	0	0	0	0	0	67
OG0000649	0	0	0	0	0	0	0	0	0	0	0	0	0	66	0	0	1	0	0	0	0	0	67
OG0000650	5	3	2	4	2	3	4	3	2	3	3	2	4	2	3	3	3	2	2	5	3	3	66
OG0000651	3	2	9	2	13	0	4	4	2	1	9	2	4	0	3	2	2	2	0	0	2	0	66
OG0000652	2	1	2	0	3	0	0	0	13	0	3	1	2	14	0	1	0	21	0	0	3	0	66
OG0000653	11	1	2	2	3	1	2	5	2	1	1	6	2	3	5	3	0	5	3	2	3	3	66
OG0000654	2	0	0	0	1	0	0	1	0	0	59	3	0	0	0	0	0	0	0	0	0	0	66
OG0000655	7	4	5	2	3	0	2	2	3	2	4	1	7	2	2	3	3	8	3	0	2	1	66
OG0000656	3	2	3	0	2	1	1	1	2	8	1	2	3	7	2	2	3	2	5	5	3	8	66
OG0000657	4	4	1	0	8	7	0	0	10	1	0	0	1	26	0	0	0	4	0	0	0	0	66
OG0000658	5	2	4	2	2	5	1	2	4	5	2	1	4	5	3	8	2	4	2	0	2	1	66
OG0000659	6	4	2	1	2	0	2	2	2	4	5	2	5	9	4	3	3	3	3	1	2	1	66
OG0000660	1	1	18	2	3	3	2	3	2	1	1	2	1	2	1	3	1	1	4	12	1	1	66
OG0000661	7	3	0	0	33	0	3	0	3	4	0	2	6	0	0	1	1	3	0	0	0	0	66
OG0000662	0	3	4	2	14	0	7	0	5	6	3	0	3	6	0	4	4	0	3	1	0	1	66
OG0000663	0	1	3	0	1	0	0	0	1	1	53	0	0	2	0	1	0	2	0	0	1	0	66
OG0000664	0	0	65	0	0	0	0	0	0	0	1	0	0	0	0	0	0	0	0	0	0	0	66
OG0000665	0	0	66	0	0	0	0	0	0	0	0	0	0	0	0	0	0	0	0	0	0	0	66
OG0000666	3	1	1	2	16	2	6	4	2	1	2	4	1	2	1	1	2	1	1	7	2	3	65
OG0000667	8	3	0	0	0	0	0	0	0	0	42	0	1	3	0	6	1	1	0	0	0	0	65
OG0000668	2	4	22	0	1	0	6	0	0	11	4	0	1	4	9	1	0	0	0	0	0	0	65
OG0000669	4	1	1	2	10	8	7	4	1	2	1	4	1	5	1	1	1	1	1	4	3	2	65
OG0000670	6	5	6	1	2	1	2	3	1	1	12	1	5	1	3	4	1	5	0	0	5	0	65
OG0000671	6	4	5	1	6	0	0	5	2	4	0	1	3	1	0	6	2	4	2	0	8	5	65
OG0000672	3	3	4	2	3	2	2	4	3	2	2	2	2	9	3	3	4	2	4	1	3	2	65
OG0000673	4	2	0	0	0	0	0	0	2	1	0	1	7	19	7	4	0	4	1	0	13	0	65
OG0000674	16	9	1	0	2	0	0	2	16	4	0	3	8	2	0	1	1	0	0	0	0	0	65
OG0000675	7	6	0	0	1	0	0	3	9	9	0	2	6	2	3	12	4	0	0	1	0	0	65
OG0000676	3	6	1	0	8	2	3	0	8	8	2	0	7	2	0	6	0	0	0	8	1	0	65
OG0000677	4	4	6	1	8	1	1	1	2	4	8	2	3	3	0	2	3	1	4	4	1	2	65
OG0000678	4	4	3	2	2	1	1	1	4	3	3	1	4	8	3	5	4	5	1	2	3	1	65
OG0000679	10	6	0	0	0	0	0	2	3	7	0	4	6	2	4	8	4	0	0	0	9	0	65
OG0000680	2	2	3	3	5	4	3	3	4	3	2	2	3	4	1	3	3	3	3	5	2	2	65
OG0000681	1	1	3	1	6	6	1	1	2	3	3	3	1	5	1	4	1	2	4	15	1	0	65
OG0000682	2	1	2	2	14	2	9	2	2	1	7	3	1	5	3	1	1	2	1	1	2	1	65
OG0000683	0	0	65	0	0	0	0	0	0	0	0	0	0	0	0	0	0	0	0	0	0	0	65
OG0000684	0	0	4	0	20	0	3	0	2	1	0	0	0	22	0	0	6	7	0	0	0	0	65
OG0000685	0	0	0	0	0	7	0	0	0	0	0	0	3	46	6	1	1	1	0	0	0	0	65
OG0000686	0	0	0	0	0	0	0	0	0	64	1	0	0	0	0	0	0	0	0	0	0	0	65
OG0000687	0	0	0	0	0	0	0	0	0	0	0	0	0	0	0	0	0	0	0	0	65	0	65
OG0000688	2	4	2	3	3	1	3	4	4	4	2	5	4	5	0	4	3	3	1	1	3	3	64
OG0000689	4	2	3	3	1	1	2	11	5	1	5	8	1	2	2	0	1	3	1	3	4	1	64
OG0000690	4	1	1	1	3	1	0	1	12	2	3	1	5	4	1	5	8	4	2	1	3	1	64
OG0000691	3	5	2	2	4	0	0	2	9	3	6	1	4	3	0	5	5	3	1	0	3	3	64
OG0000692	7	5	5	5	17	0	3	2	3	2	9	1	1	0	2	0	0	2	0	0	0	0	64
OG0000693	22	8	4	1	2	0	0	0	10	6	2	0	2	0	4	2	1	0	0	0	0	0	64
OG0000694	4	2	1	1	2	5	2	6	2	3	1	1	3	1	6	1	1	2	4	8	1	7	64
OG0000695	2	2	2	2	11	2	6	6	2	2	2	5	2	3	2	3	2	2	2	1	1	2	64
OG0000696	1	4	0	1	13	3	7	4	1	2	1	4	2	2	0	1	1	2	2	11	1	1	64
OG0000697	4	2	12	1	7	2	4	3	3	2	3	3	2	2	0	2	2	2	1	1	4	2	64
OG0000698	3	3	2	3	5	1	3	4	3	2	3	3	2	5	2	2	2	2	2	6	4	2	64
OG0000699	1	0	2	0	1	0	0	0	0	0	0	1	4	9	0	0	1	12	6	8	3	16	64
OG0000700	0	0	5	3	17	3	5	0	7	0	4	0	0	1	1	10	0	0	4	0	0	4	64
OG0000701	0	0	8	0	13	16	1	0	0	14	1	0	1	4	0	1	0	0	0	0	4	1	64
OG0000702	0	0	0	0	64	0	0	0	0	0	0	0	0	0	0	0	0	0	0	0	0	0	64
OG0000703	6	2	4	1	10	1	6	3	4	3	1	2	4	2	4	1	3	4	0	1	1	0	63
OG0000704	5	5	1	0	0	0	0	6	4	9	5	1	2	4	2	5	2	7	1	0	1	3	63
OG0000705	16	0	0	1	2	1	2	2	5	1	1	1	2	8	0	2	8	10	0	0	1	0	63
OG0000706	6	1	2	2	2	0	2	2	4	1	1	2	1	0	0	2	2	25	0	0	8	0	63
OG0000707	7	5	4	4	7	1	3	0	3	5	5	0	5	2	1	3	3	1	1	1	1	1	63
OG0000708	29	0	0	0	7	3	0	0	0	3	0	11	0	9	0	0	1	0	0	0	0	0	63
OG0000709	2	1	4	3	7	4	3	4	1	1	9	5	1	2	3	1	2	1	1	2	2	4	63
OG0000710	2	3	3	2	2	1	1	2	5	3	4	2	3	3	3	3	6	5	3	1	6	0	63
OG0000711	4	3	2	2	2	3	2	2	4	3	3	2	3	4	3	4	3	2	2	7	1	2	63
OG0000712	1	2	20	1	2	0	0	1	1	5	1	1	0	2	1	11	1	2	1	0	9	1	63
OG0000713	2	4	6	2	3	1	1	6	1	8	2	5	5	5	3	1	1	3	1	0	2	1	63
OG0000714	0	2	1	0	26	0	9	0	2	2	1	0	6	4	0	2	0	0	1	6	0	1	63
OG0000715	0	2	2	3	10	1	6	3	3	2	2	3	2	3	5	2	2	3	1	7	0	1	63
OG0000716	7	3	4	1	2	1	3	1	5	4	2	2	2	4	3	3	3	4	0	3	4	1	62
OG0000717	6	3	2	3	3	2	2	1	2	4	2	1	5	6	5	4	3	2	0	3	1	2	62
OG0000718	27	0	0	3	2	3	1	1	1	2	1	0	0	2	0	3	0	3	0	0	0	13	62
OG0000719	4	3	2	4	7	0	2	1	6	2	10	0	2	6	0	2	2	7	0	2	0	0	62
OG0000720	16	0	0	0	0	1	0	2	0	0	0	2	0	0	0	0	0	41	0	0	0	0	62
OG0000721	3	2	3	0	2	2	3	4	3	4	0	3	3	1	6	4	2	4	2	4	5	2	62
OG0000722	1	4	5	1	10	0	2	4	2	1	1	5	1	1	1	1	1	1	7	7	3	3	62
OG0000723	5	5	7	0	5	1	0	2	3	1	0	2	4	4	3	4	4	6	3	0	3	0	62
OG0000724	1	3	4	4	9	2	6	2	2	4	3	2	4	1	3	1	1	1	2	4	0	3	62
OG0000725	3	1	6	1	3	1	5	7	6	2	4	5	4	3	1	2	2	1	1	2	1	1	62
OG0000726	3	1	1	2	12	1	4	1	2	2	1	1	2	4	1	2	4	3	2	10	2	1	62
OG0000727	0	6	3	1	14	0	4	0	5	6	2	0	4	1	0	4	2	1	0	9	0	0	62
OG0000728	0	14	3	1	6	3	3	0	4	1	4	0	3	1	6	10	1	0	0	2	0	0	62
OG0000729	0	0	0	0	0	62	0	0	0	0	0	0	0	0	0	0	0	0	0	0	0	0	62
OG0000730	9	6	1	1	1	3	1	0	3	2	4	1	9	7	1	1	1	1	1	1	2	5	61
OG0000731	4	2	4	2	3	4	2	2	3	2	2	2	2	4	2	2	2	2	3	6	4	2	61
OG0000732	4	2	6	1	5	0	2	1	2	7	5	1	9	0	1	5	4	4	0	0	2	0	61
OG0000733	4	7	1	0	2	0	1	0	2	1	21	0	10	0	0	3	1	3	0	0	5	0	61
OG0000734	4	1	1	0	0	0	0	0	2	2	0	0	3	24	4	0	0	0	3	0	12	5	61
OG0000735	9	2	1	2	14	0	6	5	1	1	1	4	1	1	0	1	1	1	2	2	1	5	61
OG0000736	2	6	3	1	4	2	4	2	3	4	4	4	3	2	2	2	3	2	2	0	4	2	61
OG0000737	3	2	3	2	5	0	2	6	5	3	2	7	2	3	1	2	2	4	2	0	3	2	61
OG0000738	8	7	0	1	0	0	0	0	5	1	0	0	7	8	5	0	19	0	0	0	0	0	61
OG0000739	5	2	2	3	9	1	4	4	2	2	2	4	3	2	1	2	2	1	2	6	0	2	61
OG0000740	1	2	5	4	5	1	7	2	2	4	3	2	2	5	3	3	1	2	2	3	1	1	61
OG0000741	1	2	2	3	1	5	1	1	3	1	4	1	3	10	4	4	5	3	2	2	2	1	61
OG0000742	5	2	1	3	2	0	0	4	2	3	1	4	5	3	1	1	2	6	5	10	0	1	61
OG0000743	1	2	1	0	0	2	0	0	4	8	0	0	3	0	0	1	1	2	4	29	3	0	61
OG0000744	0	2	1	0	53	0	0	0	0	0	0	0	4	0	0	0	0	0	0	0	0	1	61
OG0000745	0	0	5	2	0	0	0	0	0	10	0	0	0	0	40	0	0	2	0	1	1	0	61
OG0000746	0	0	0	0	0	2	0	0	1	0	0	0	0	0	58	0	0	0	0	0	0	0	61
OG0000747	0	0	0	0	0	0	0	0	0	0	2	0	0	0	59	0	0	0	0	0	0	0	61
OG0000748	0	0	0	0	0	0	0	0	0	0	0	0	0	0	0	0	0	61	0	0	0	0	61
OG0000749	0	0	0	0	0	0	0	0	0	0	0	0	0	0	0	0	0	0	0	61	0	0	61
OG0000750	0	0	0	0	0	0	0	0	0	0	0	0	0	0	0	0	0	0	0	0	61	0	61
OG0000751	0	0	0	0	0	0	0	0	0	0	0	0	0	0	0	0	0	0	0	0	61	0	61
OG0000752	50	4	0	0	0	0	0	0	0	2	0	0	1	1	0	0	0	1	0	0	1	0	60
OG0000753	3	2	3	1	2	2	2	5	2	3	3	6	2	3	2	2	2	4	2	4	2	3	60
OG0000754	13	3	0	2	1	0	1	0	16	6	8	0	4	0	0	3	0	3	0	0	0	0	60
OG0000755	4	3	3	2	2	1	2	2	4	3	2	3	4	2	6	3	2	4	2	2	3	1	60
OG0000756	1	4	1	1	4	0	0	0	1	1	0	1	1	1	2	1	3	1	9	0	6	22	60
OG0000757	7	3	3	2	3	3	2	0	3	3	4	1	3	2	3	3	2	7	1	1	3	1	60
OG0000758	2	2	3	2	3	3	2	2	3	3	2	1	2	5	3	4	4	1	3	3	5	2	60
OG0000759	2	2	4	2	3	0	1	0	5	2	4	0	6	2	0	19	0	5	0	2	1	0	60
OG0000760	1	3	2	2	3	3	4	2	5	2	1	2	5	9	1	2	2	2	3	1	3	2	60
OG0000761	24	9	8	1	0	0	0	0	0	0	0	0	0	5	1	2	0	9	0	0	1	0	60
OG0000762	2	2	2	1	12	2	5	2	2	2	2	2	2	2	1	2	2	4	2	5	2	2	60
OG0000763	5	1	1	1	6	4	3	6	1	1	1	6	2	5	2	1	2	1	4	5	1	1	60
OG0000764	1	1	2	2	8	3	6	4	3	2	2	4	1	3	2	2	2	1	1	8	0	2	60
OG0000765	10	3	3	3	3	1	1	0	7	3	2	0	3	3	2	2	2	2	1	1	3	5	60
OG0000766	3	2	1	2	1	7	1	3	3	4	4	4	2	6	5	2	2	4	0	1	2	1	60
OG0000767	8	6	2	1	0	0	0	0	2	7	1	0	8	3	0	2	1	13	2	1	3	0	60
OG0000768	8	2	4	0	3	3	0	0	3	3	5	2	2	4	3	2	4	1	2	5	2	2	60
OG0000769	2	2	2	4	2	3	2	2	3	2	3	1	4	4	1	2	4	4	2	6	3	2	60
OG0000770	7	6	3	0	1	0	0	0	6	4	0	0	11	8	0	1	2	8	0	0	3	0	60
OG0000771	1	14	0	3	2	2	3	2	3	0	3	4	3	3	1	1	4	6	0	1	3	1	60
OG0000772	4	4	5	0	3	0	2	1	7	3	3	3	5	3	0	2	1	8	1	1	3	1	60
OG0000773	1	2	1	1	1	2	1	2	3	6	1	2	3	4	1	1	0	1	1	14	11	1	60
OG0000774	0	10	3	2	5	0	2	0	4	5	10	0	5	0	3	8	3	0	0	0	0	0	60
OG0000775	0	2	1	2	22	0	10	0	1	1	2	0	2	5	0	1	3	0	0	8	0	0	60
OG0000776	0	0	11	0	18	0	0	0	0	0	3	0	0	20	0	0	0	0	2	0	6	0	60
OG0000777	0	0	0	0	0	0	0	0	1	0	59	0	0	0	0	0	0	0	0	0	0	0	60
OG0000778	17	1	0	0	0	4	0	1	2	0	2	4	0	0	19	1	0	5	0	0	3	0	59
OG0000779	9	3	0	0	0	1	0	6	1	2	0	7	13	1	0	2	0	7	5	0	1	1	59
OG0000780	10	1	0	0	0	0	0	0	0	0	42	0	0	2	0	2	0	2	0	0	0	0	59
OG0000781	58	1	0	0	0	0	0	0	0	0	0	0	0	0	0	0	0	0	0	0	0	0	59
OG0000782	2	2	2	2	3	2	3	4	2	2	3	4	3	3	5	2	2	2	1	3	3	4	59
OG0000783	7	3	2	1	9	0	0	0	0	0	13	0	2	3	0	7	1	2	1	0	5	3	59
OG0000784	2	2	7	3	0	3	0	0	2	3	6	0	4	5	6	2	7	2	1	1	2	1	59
OG0000785	4	5	2	2	4	2	2	1	4	2	2	2	3	2	5	2	3	4	3	1	2	2	59
OG0000786	2	3	1	3	7	4	6	3	1	2	1	4	2	1	4	1	2	2	1	6	2	1	59
OG0000787	2	3	11	2	0	4	0	2	4	3	6	2	2	6	1	2	2	4	0	0	3	0	59
OG0000788	2	1	2	2	4	7	2	4	1	2	1	4	1	2	1	3	1	10	1	5	1	2	59
OG0000789	4	2	2	1	2	2	1	1	6	4	3	2	4	7	2	4	3	4	0	2	3	0	59
OG0000790	2	2	3	3	3	3	2	4	2	2	3	4	2	4	2	2	2	3	2	3	4	2	59
OG0000791	2	4	6	2	4	2	1	3	3	3	2	2	4	5	2	3	3	6	1	0	1	0	59
OG0000792	3	0	0	0	9	0	0	7	14	0	0	4	0	12	0	5	0	1	4	0	0	0	59
OG0000793	1	4	8	1	3	2	3	2	6	2	2	2	2	3	3	2	2	2	2	1	2	4	59
OG0000794	3	2	4	2	6	3	2	3	4	2	4	4	2	5	3	2	2	2	0	2	2	0	59
OG0000795	1	4	6	1	4	0	3	1	6	5	2	1	9	1	0	9	0	2	0	2	2	0	59
OG0000796	2	7	3	1	1	0	0	1	2	3	0	1	7	5	2	3	3	6	2	1	2	7	59
OG0000797	2	1	1	1	5	1	2	6	2	1	2	7	2	3	4	2	2	8	2	2	1	2	59
OG0000798	4	2	2	1	7	0	4	4	2	2	3	5	2	2	3	2	2	3	3	2	1	3	59
OG0000799	0	3	3	8	2	0	0	0	6	1	3	0	8	10	0	5	5	1	0	4	0	0	59
OG0000800	0	2	4	2	2	1	1	1	5	1	6	1	2	5	0	2	1	6	7	0	1	9	59
OG0000801	0	0	1	4	2	0	1	0	4	1	2	0	0	4	3	3	1	25	0	0	8	0	59
OG0000802	0	0	57	0	0	0	0	0	0	1	0	0	0	1	0	0	0	0	0	0	0	0	59
OG0000803	7	1	2	3	4	0	0	1	4	1	7	1	2	9	0	2	3	3	2	6	0	0	58
OG0000804	1	4	8	0	8	0	6	2	3	5	13	2	1	0	0	0	5	0	0	0	0	0	58
OG0000805	12	0	1	0	0	0	0	0	8	11	1	1	1	0	0	9	2	11	0	0	1	0	58
OG0000806	1	3	3	2	4	5	2	1	3	2	8	1	4	5	2	2	3	1	1	2	1	2	58
OG0000807	2	3	6	1	3	1	4	3	3	2	2	3	2	2	2	2	2	2	3	6	2	2	58
OG0000808	1	1	2	2	3	4	4	3	1	4	4	3	1	7	3	1	3	4	1	2	2	2	58
OG0000809	3	2	2	1	1	3	1	3	2	2	2	4	3	3	2	2	3	5	6	2	2	4	58
OG0000810	3	3	4	1	2	0	0	2	6	2	5	2	2	5	0	6	2	3	3	5	1	1	58
OG0000811	1	2	3	2	1	3	0	3	4	1	4	2	2	4	6	2	3	2	1	9	2	1	58
OG0000812	5	4	2	0	2	1	2	6	3	3	1	7	2	2	5	1	1	1	2	1	5	2	58
OG0000813	8	2	0	0	0	0	0	0	0	1	0	0	0	35	2	10	0	0	0	0	0	0	58
OG0000814	1	1	3	2	6	2	4	4	4	3	2	4	1	1	1	3	2	1	1	6	1	5	58
OG0000815	5	2	3	0	1	0	2	3	2	2	0	2	3	5	0	2	2	8	4	8	4	0	58
OG0000816	2	1	3	1	4	2	3	5	3	2	4	5	2	3	6	2	1	2	1	3	2	1	58
OG0000817	1	2	5	4	7	0	2	0	3	19	2	0	3	2	0	2	1	3	1	0	1	0	58
OG0000818	2	4	2	2	9	2	2	4	3	1	3	3	1	3	0	2	3	1	2	7	1	1	58
OG0000819	2	4	3	1	4	2	1	3	3	1	3	3	7	4	2	3	3	2	2	1	1	3	58
OG0000820	5	2	3	1	3	2	1	0	2	2	12	0	3	8	2	5	1	5	0	0	1	0	58
OG0000821	2	1	2	3	6	3	1	4	1	1	2	5	1	1	7	1	1	8	1	4	2	1	58
OG0000822	6	4	1	0	1	5	0	3	2	5	1	3	6	3	6	2	3	1	1	0	2	3	58
OG0000823	1	1	5	1	5	1	2	3	1	2	1	3	5	1	2	1	6	8	1	5	3	0	58
OG0000824	2	3	2	0	0	0	0	1	0	1	1	2	11	1	2	3	1	27	0	1	0	0	58
OG0000825	1	4	2	3	5	1	1	2	4	4	2	2	3	3	1	4	2	4	3	2	3	2	58
OG0000826	1	2	3	2	6	1	5	4	2	2	3	4	2	3	1	2	2	2	3	3	3	2	58
OG0000827	1	2	5	4	0	1	3	0	2	7	5	1	3	2	5	5	2	4	1	2	2	1	58
OG0000828	0	3	22	2	3	0	8	0	3	0	0	0	4	0	0	11	0	0	1	0	0	1	58
OG0000829	0	0	0	0	0	0	58	0	0	0	0	0	0	0	0	0	0	0	0	0	0	0	58
OG0000830	1	1	0	2	6	2	4	2	3	1	8	3	1	4	1	1	4	2	1	6	3	1	57
OG0000831	49	1	1	2	0	0	0	0	2	0	1	0	0	0	0	0	1	0	0	0	0	0	57
OG0000832	7	1	6	2	3	0	1	2	2	4	1	2	1	0	0	0	1	7	7	4	5	1	57
OG0000833	21	0	1	0	0	0	25	0	4	0	0	2	0	0	0	0	0	0	0	0	4	0	57
OG0000834	2	2	2	3	3	4	2	4	2	2	2	3	2	4	2	2	2	2	2	5	3	2	57
OG0000835	5	9	3	3	1	0	0	0	6	3	0	0	12	4	0	3	3	2	0	2	1	0	57
OG0000836	2	2	2	3	6	0	3	5	2	2	2	5	2	3	2	2	3	3	2	0	3	3	57
OG0000837	3	2	2	2	2	4	1	5	2	4	2	7	1	3	4	2	5	2	1	0	1	2	57
OG0000838	2	2	3	2	4	3	0	3	3	3	4	4	4	4	3	3	4	1	1	0	1	3	57
OG0000839	2	3	2	3	0	3	0	4	18	1	1	0	1	1	3	1	4	2	1	7	0	0	57
OG0000840	1	1	1	2	8	2	7	4	2	2	4	5	1	5	3	1	1	1	1	2	1	2	57
OG0000841	3	2	4	3	0	4	3	2	4	2	4	1	2	3	3	2	4	3	1	1	4	2	57
OG0000842	2	1	4	5	5	0	4	1	3	2	4	1	2	2	2	3	2	3	1	2	1	7	57
OG0000843	5	0	2	1	1	0	0	3	7	4	0	4	2	3	4	6	5	3	2	2	2	1	57
OG0000844	2	1	5	6	3	1	1	2	1	1	11	2	1	3	2	5	1	1	1	1	5	1	57
OG0000845	4	3	2	2	2	0	0	3	1	2	4	4	3	5	3	2	1	8	1	3	3	1	57
OG0000846	6	1	0	0	0	0	0	0	0	5	0	0	0	31	7	7	0	0	0	0	0	0	57
OG0000847	1	2	3	2	3	2	4	7	2	2	2	5	2	4	2	2	2	2	2	3	1	2	57
OG0000848	2	9	4	4	2	1	1	0	4	5	6	0	3	2	2	2	2	2	0	6	0	0	57
OG0000849	1	3	0	3	1	1	3	3	4	1	2	3	2	10	0	7	1	1	2	4	4	1	57
OG0000850	3	2	5	2	2	4	1	2	6	2	3	2	2	3	3	2	4	3	1	1	3	1	57
OG0000851	2	5	2	3	6	1	2	2	4	2	3	1	2	4	1	2	2	3	2	3	2	3	57
OG0000852	2	1	1	1	11	0	6	4	1	2	1	4	1	1	1	1	1	1	1	13	1	2	57
OG0000853	0	0	57	0	0	0	0	0	0	0	0	0	0	0	0	0	0	0	0	0	0	0	57
OG0000854	0	0	0	0	0	0	0	0	0	0	57	0	0	0	0	0	0	0	0	0	0	0	57
OG0000855	0	0	0	0	0	0	0	0	0	0	57	0	0	0	0	0	0	0	0	0	0	0	57
OG0000856	0	0	0	0	0	0	0	0	0	0	0	0	0	0	57	0	0	0	0	0	0	0	57
OG0000857	37	0	0	0	0	0	0	0	0	0	0	0	0	9	4	4	1	0	0	0	1	0	56
OG0000858	8	2	2	2	5	6	5	1	1	1	2	1	1	2	1	1	1	4	1	7	2	0	56
OG0000859	7	2	2	0	1	0	1	0	5	1	12	0	2	2	6	1	1	1	4	0	3	5	56
OG0000860	3	3	2	1	4	1	2	2	2	1	2	5	2	6	3	3	1	1	1	7	2	2	56
OG0000861	3	2	2	2	3	2	1	2	3	2	4	2	2	7	6	2	2	2	2	3	1	1	56
OG0000862	2	2	2	2	3	3	3	5	2	2	2	5	2	3	2	2	2	2	2	4	2	2	56
OG0000863	18	3	0	5	0	0	0	1	3	2	0	2	1	2	6	4	3	3	1	0	0	2	56
OG0000864	2	2	1	3	5	6	2	2	2	3	5	4	1	4	1	1	2	1	3	2	2	2	56
OG0000865	3	2	3	2	2	2	2	4	3	2	2	4	2	3	3	1	3	2	3	3	3	2	56
OG0000866	7	0	0	0	0	2	0	0	0	0	0	0	0	0	0	0	3	3	3	0	38	0	56
OG0000867	5	3	4	1	0	1	3	0	3	0	10	1	2	8	3	0	1	1	0	2	8	0	56
OG0000868	2	1	2	2	4	1	2	3	2	2	6	5	2	4	5	4	3	1	1	2	1	1	56
OG0000869	2	2	2	2	6	1	5	3	3	2	2	3	2	3	3	2	2	2	4	2	2	1	56
OG0000870	5	2	5	3	3	1	0	2	1	2	2	2	2	1	4	1	4	3	0	0	9	4	56
OG0000871	4	3	2	1	2	0	1	1	3	4	1	1	6	5	3	3	2	3	3	3	1	4	56
OG0000872	2	1	2	2	5	3	3	5	3	1	2	4	1	5	3	2	2	2	2	2	2	2	56
OG0000873	3	1	3	2	1	3	0	3	3	2	1	4	3	4	3	3	2	4	2	4	1	4	56
OG0000874	2	2	3	2	3	4	1	3	4	2	2	3	2	3	2	2	4	2	1	5	2	2	56
OG0000875	1	2	2	2	5	1	3	6	1	2	2	5	3	3	3	3	2	3	2	3	1	1	56
OG0000876	7	0	7	2	0	0	0	1	0	0	6	1	0	0	1	7	1	15	1	0	5	2	56
OG0000877	1	2	4	1	1	1	4	1	4	2	4	3	2	3	0	5	2	3	2	3	4	4	56
OG0000878	1	2	5	2	5	1	5	2	1	1	7	1	2	3	2	1	3	2	1	6	2	1	56
OG0000879	1	2	4	4	5	2	3	5	1	1	4	5	1	2	0	6	1	2	1	2	2	2	56
OG0000880	2	1	1	1	8	3	7	4	1	1	1	4	1	2	1	1	1	1	1	12	1	1	56
OG0000881	1	5	0	0	0	0	0	0	0	0	0	0	3	45	0	1	0	1	0	0	0	0	56
OG0000882	0	3	0	0	0	0	0	0	14	0	10	0	3	8	1	9	8	0	0	0	0	0	56
OG0000883	0	1	4	4	11	0	8	0	3	1	4	0	1	4	0	12	1	0	0	2	0	0	56
OG0000884	0	2	6	4	14	0	9	0	2	3	6	1	2	1	0	1	1	0	1	3	0	0	56
OG0000885	0	0	53	0	0	0	3	0	0	0	0	0	0	0	0	0	0	0	0	0	0	0	56
OG0000886	0	0	10	0	5	0	28	0	0	0	0	0	1	0	0	0	0	0	9	0	1	2	56
OG0000887	0	0	0	0	56	0	0	0	0	0	0	0	0	0	0	0	0	0	0	0	0	0	56
OG0000888	0	0	0	0	0	0	56	0	0	0	0	0	0	0	0	0	0	0	0	0	0	0	56
OG0000889	0	0	0	0	0	0	0	56	0	0	0	0	0	0	0	0	0	0	0	0	0	0	56
OG0000890	0	0	0	0	0	0	0	0	0	0	56	0	0	0	0	0	0	0	0	0	0	0	56
OG0000891	0	0	0	0	0	0	0	0	0	0	0	0	0	56	0	0	0	0	0	0	0	0	56
OG0000892	0	0	0	0	0	0	0	0	0	0	0	0	0	0	0	56	0	0	0	0	0	0	56
OG0000893	7	4	3	0	0	0	0	4	2	4	0	4	6	2	0	2	1	11	0	0	5	0	55
OG0000894	37	0	7	0	0	0	0	0	0	2	0	0	0	0	0	0	0	0	0	0	1	8	55
OG0000895	2	2	4	3	6	3	1	2	2	3	4	1	2	2	1	4	2	2	4	1	1	3	55
OG0000896	6	3	2	1	2	0	1	5	4	1	0	4	8	3	2	2	4	2	0	0	5	0	55
OG0000897	3	1	8	0	3	0	1	0	0	0	15	0	2	1	1	4	0	3	2	0	11	0	55
OG0000898	53	0	0	0	0	0	0	0	0	0	0	0	0	0	0	0	0	1	0	0	1	0	55
OG0000899	2	8	0	0	0	0	0	0	10	7	0	0	8	0	1	7	5	4	2	0	1	0	55
OG0000900	1	1	1	1	3	3	7	4	4	1	2	3	3	3	2	4	2	2	1	3	3	1	55
OG0000901	1	1	2	3	10	1	5	1	2	2	2	1	2	2	1	2	3	1	2	7	2	2	55
OG0000902	3	3	4	1	4	2	5	0	1	2	5	0	2	9	0	4	3	2	4	1	0	0	55
OG0000903	2	0	2	1	5	2	4	3	3	2	3	5	2	4	2	3	2	2	2	3	1	2	55
OG0000904	4	1	2	2	2	9	0	2	3	2	1	2	2	1	3	2	3	4	2	5	1	2	55
OG0000905	6	3	2	3	4	0	3	2	4	3	0	1	2	3	3	1	3	6	1	1	1	3	55
OG0000906	2	3	3	2	5	2	3	3	3	1	2	3	2	3	2	2	3	1	3	3	2	2	55
OG0000907	1	3	1	2	6	4	3	3	1	1	2	3	1	3	1	3	2	1	4	7	2	1	55
OG0000908	1	0	0	1	0	0	0	0	0	2	0	1	0	0	0	0	0	0	0	50	0	0	55
OG0000909	2	2	2	2	2	1	3	2	2	2	4	4	2	3	6	3	2	1	3	1	4	2	55
OG0000910	1	1	1	2	7	3	5	3	1	1	1	3	1	2	1	1	1	2	1	14	1	2	55
OG0000911	1	2	1	1	2	2	4	1	5	2	3	2	3	5	3	4	5	2	2	3	1	1	55
OG0000912	2	4	1	2	2	6	3	1	1	2	6	1	2	1	1	4	2	3	2	7	0	2	55
OG0000913	1	1	1	3	3	1	1	28	1	1	1	2	1	2	1	1	1	1	1	0	2	1	55
OG0000914	0	3	3	0	1	0	0	0	5	3	2	0	2	17	1	0	1	17	0	0	0	0	55
OG0000915	0	2	0	1	20	0	6	0	1	1	9	0	1	3	0	2	1	0	6	0	0	2	55
OG0000916	0	1	0	0	0	0	0	0	0	0	0	0	54	0	0	0	0	0	0	0	0	0	55
OG0000917	0	0	1	0	4	0	0	0	0	3	6	0	0	18	9	0	0	14	0	0	0	0	55
OG0000918	0	0	0	0	0	55	0	0	0	0	0	0	0	0	0	0	0	0	0	0	0	0	55
OG0000919	0	0	0	0	0	0	0	0	0	0	0	0	0	0	1	0	0	54	0	0	0	0	55
OG0000920	0	0	0	0	0	0	0	0	0	0	0	0	0	0	0	0	0	55	0	0	0	0	55
OG0000921	0	0	0	0	0	0	0	0	0	0	0	0	0	0	0	0	0	0	55	0	0	0	55
OG0000922	1	1	2	3	4	1	5	2	1	4	1	2	2	1	2	1	1	2	4	5	5	4	54
OG0000923	2	2	2	2	2	2	2	3	3	2	2	3	2	2	1	2	2	2	2	9	2	3	54
OG0000924	2	3	2	3	4	2	2	5	2	2	2	5	2	3	2	2	2	1	2	3	1	2	54
OG0000925	1	5	2	4	2	1	2	2	4	3	5	3	5	3	1	3	2	1	1	2	2	0	54
OG0000926	1	0	0	0	0	0	0	0	0	0	53	0	0	0	0	0	0	0	0	0	0	0	54
OG0000927	2	2	2	2	6	2	4	5	2	2	1	4	2	2	2	2	2	2	0	5	1	2	54
OG0000928	4	2	1	1	1	2	1	4	5	5	1	3	1	4	3	2	2	2	3	2	2	3	54
OG0000929	1	3	2	2	2	2	4	4	5	1	1	4	2	3	3	3	1	2	2	4	1	2	54
OG0000930	3	3	2	1	3	2	3	2	4	3	2	1	4	5	3	3	3	1	2	1	2	1	54
OG0000931	1	3	2	2	5	1	2	6	1	2	2	4	1	3	3	2	2	2	3	2	3	2	54
OG0000932	1	1	3	2	17	0	9	2	1	1	2	2	1	3	0	1	1	1	1	1	2	2	54
OG0000933	11	3	10	0	0	0	0	0	8	9	0	0	5	0	1	7	0	0	0	0	0	0	54
OG0000934	1	0	1	0	0	0	0	1	1	2	1	0	0	1	0	0	1	44	0	0	1	0	54
OG0000935	1	2	3	1	8	1	3	2	4	3	1	2	2	2	1	3	2	4	2	0	4	3	54
OG0000936	0	0	0	0	54	0	0	0	0	0	0	0	0	0	0	0	0	0	0	0	0	0	54
OG0000937	0	0	0	0	0	1	0	0	2	7	3	0	0	28	0	0	2	11	0	0	0	0	54
OG0000938	0	0	0	0	0	0	54	0	0	0	0	0	0	0	0	0	0	0	0	0	0	0	54
OG0000939	0	0	0	0	0	0	0	0	0	0	0	0	0	0	0	0	0	0	0	54	0	0	54
OG0000940	0	0	0	0	0	0	0	0	0	0	0	0	0	0	0	0	0	0	0	54	0	0	54
OG0000941	8	1	1	0	3	4	1	5	3	2	1	8	1	3	1	2	1	1	1	5	0	1	53
OG0000942	26	0	2	0	1	0	0	0	0	9	0	0	0	5	3	0	1	6	0	0	0	0	53
OG0000943	13	2	0	0	4	0	0	0	0	0	0	0	0	22	0	8	0	4	0	0	0	0	53
OG0000944	1	7	1	2	5	2	2	2	2	6	2	2	4	2	1	2	4	1	1	1	1	2	53
OG0000945	4	2	3	0	5	2	2	3	1	0	0	6	1	2	8	1	1	1	0	10	1	0	53
OG0000946	2	1	1	1	7	4	3	1	2	2	2	1	1	2	1	1	6	3	4	1	1	6	53
OG0000947	2	2	2	4	4	1	4	3	4	2	2	3	2	2	3	2	2	2	2	3	0	2	53
OG0000948	1	2	1	2	4	1	3	3	2	1	2	3	1	1	3	2	2	1	1	15	1	1	53
OG0000949	4	1	7	2	2	0	0	1	2	3	3	2	4	2	2	4	2	4	0	2	5	1	53
OG0000950	1	1	1	1	1	2	1	1	2	1	2	0	1	3	1	1	1	1	3	25	2	1	53
OG0000951	2	2	3	2	3	1	4	4	3	2	2	4	2	3	3	2	2	2	1	3	2	1	53
OG0000952	6	4	2	1	1	0	0	1	4	2	1	4	0	4	7	4	1	8	1	0	2	0	53
OG0000953	2	2	4	2	3	1	1	2	2	2	2	2	3	3	3	2	2	6	1	2	3	3	53
OG0000954	1	7	1	1	2	6	2	8	1	2	1	3	1	5	2	1	1	1	1	4	0	2	53
OG0000955	1	7	1	0	6	0	0	1	2	1	20	1	2	3	1	2	1	1	1	0	1	1	53
OG0000956	2	1	2	2	2	3	2	3	3	2	2	2	2	4	4	2	2	2	2	2	5	2	53
OG0000957	2	1	4	2	7	2	2	2	3	1	2	2	2	4	3	2	2	3	2	1	2	2	53
OG0000958	2	1	0	10	0	5	0	0	4	0	0	0	0	3	0	0	4	0	2	0	0	22	53
OG0000959	2	2	2	3	6	0	3	4	2	2	3	4	2	2	2	0	2	2	2	4	2	2	53
OG0000960	2	2	6	2	3	1	3	4	2	1	2	4	3	3	3	2	1	2	1	1	3	2	53
OG0000961	1	2	2	1	3	2	3	2	3	1	5	2	1	3	5	1	1	1	1	9	3	1	53
OG0000962	2	7	3	2	0	3	0	1	1	6	1	3	4	2	6	0	2	7	1	2	0	0	53
OG0000963	1	2	2	2	2	3	2	5	4	2	1	5	2	3	2	2	2	2	2	4	2	1	53
OG0000964	1	5	4	2	2	0	0	0	6	4	6	0	8	4	2	1	4	3	1	0	0	0	53
OG0000965	1	1	10	0	11	0	1	2	1	1	4	1	1	1	1	1	1	0	0	2	6	7	53
OG0000966	1	1	4	1	5	1	2	2	3	1	1	2	1	2	3	5	1	1	4	1	1	10	53
OG0000967	4	1	1	1	8	2	9	2	3	1	1	2	1	3	1	1	1	1	1	7	1	1	53
OG0000968	0	6	5	4	6	0	3	0	4	3	3	0	3	1	0	4	1	0	2	5	0	3	53
OG0000969	0	0	0	0	0	0	0	0	0	0	0	0	0	0	0	0	0	53	0	0	0	0	53
OG0000970	0	0	0	0	0	0	0	0	0	0	0	0	0	0	0	0	0	0	0	53	0	0	53
OG0000971	11	1	2	2	3	1	3	2	2	0	2	2	1	1	3	1	1	9	1	2	2	0	52
OG0000972	2	1	0	0	0	0	0	0	7	1	0	0	4	6	1	1	4	0	5	16	0	4	52
OG0000973	1	2	2	2	5	1	3	3	2	2	1	4	2	3	2	2	2	2	1	7	1	2	52
OG0000974	18	1	1	0	0	2	0	2	2	1	0	3	1	2	1	1	2	3	0	11	1	0	52
OG0000975	6	0	2	1	0	1	1	3	1	1	2	3	1	2	2	1	1	1	6	2	14	1	52
OG0000976	3	3	2	1	5	1	2	6	3	1	2	6	2	4	2	2	2	1	1	1	1	1	52
OG0000977	5	1	6	6	6	3	4	0	3	2	5	0	1	3	2	1	1	0	0	0	3	0	52
OG0000978	3	2	3	1	2	0	2	3	4	3	2	4	2	3	2	3	2	3	1	2	3	2	52
OG0000979	3	5	3	0	2	0	0	4	4	2	1	5	3	6	2	0	4	2	2	0	3	1	52
OG0000980	1	3	3	3	2	2	1	2	3	3	2	2	3	5	3	4	3	3	1	1	1	1	52
OG0000981	4	1	2	2	1	3	2	5	4	2	2	4	2	2	3	2	4	2	1	1	2	1	52
OG0000982	8	1	3	2	5	3	1	1	2	3	4	1	2	3	2	2	2	4	0	2	1	0	52
OG0000983	2	2	4	1	9	0	2	4	3	2	2	6	4	2	0	2	2	1	2	0	1	1	52
OG0000984	5	1	4	2	3	1	1	1	2	2	3	1	2	2	3	2	3	3	4	3	1	3	52
OG0000985	1	2	1	0	1	0	1	1	1	0	32	0	2	2	1	1	3	1	1	0	1	0	52
OG0000986	1	3	1	1	5	11	1	1	3	1	1	1	1	1	2	1	4	8	1	2	2	0	52
OG0000987	2	1	2	2	5	2	3	2	4	2	3	2	3	3	1	2	2	2	2	2	3	2	52
OG0000988	2	2	2	1	5	1	3	4	3	2	2	4	2	4	2	2	3	2	1	2	1	2	52
OG0000989	1	2	1	2	4	2	3	4	1	2	5	4	2	3	2	4	1	1	1	5	1	1	52
OG0000990	2	3	3	2	2	1	3	1	1	4	1	2	5	3	5	1	3	2	1	0	5	2	52
OG0000991	2	2	2	1	2	3	2	4	3	2	2	3	2	3	3	2	2	2	2	4	2	2	52
OG0000992	3	2	4	1	4	1	5	2	3	1	2	2	2	6	3	2	2	1	1	0	2	3	52
OG0000993	1	3	2	1	6	1	3	2	1	2	3	2	1	2	1	1	1	1	1	11	2	4	52
OG0000994	1	0	23	0	2	4	13	0	0	1	3	2	0	0	0	0	0	0	0	0	3	0	52
OG0000995	0	9	1	2	3	1	1	6	2	2	1	6	5	3	1	3	1	1	1	1	1	1	52
OG0000996	0	1	10	4	4	0	1	0	1	1	11	0	1	3	0	8	2	0	3	1	0	1	52
OG0000997	0	0	4	0	1	0	0	0	0	2	20	0	0	25	0	0	0	0	0	0	0	0	52
OG0000998	0	0	0	2	3	0	15	0	7	0	19	0	1	0	2	3	0	0	0	0	0	0	52
OG0000999	0	0	0	0	52	0	0	0	0	0	0	0	0	0	0	0	0	0	0	0	0	0	52
OG0001000	0	0	0	0	0	0	0	0	0	0	52	0	0	0	0	0	0	0	0	0	0	0	52
OG0001001	0	0	0	0	0	0	0	0	0	0	0	0	0	0	52	0	0	0	0	0	0	0	52
OG0001002	0	0	0	0	0	0	0	0	0	0	0	0	0	0	0	52	0	0	0	0	0	0	52
OG0001003	0	0	0	0	0	0	0	0	0	0	0	0	0	0	0	0	0	0	0	52	0	0	52
OG0001004	6	0	2	2	3	0	0	2	4	0	1	1	0	5	4	3	6	5	1	1	5	0	51
OG0001005	2	2	3	3	3	3	2	3	3	2	2	1	2	3	2	2	2	2	3	2	3	1	51
OG0001006	2	1	1	2	7	2	7	3	1	1	2	4	1	2	1	1	1	1	1	8	1	1	51
OG0001007	8	1	2	1	2	2	6	2	3	1	2	1	0	0	2	0	2	3	3	0	4	6	51
OG0001008	2	1	2	3	2	1	2	7	2	2	2	5	2	3	4	1	2	2	1	1	2	2	51
OG0001009	2	4	2	3	4	3	2	3	2	2	2	2	2	2	2	2	2	2	2	3	1	2	51
OG0001010	2	3	3	2	3	2	2	4	1	2	1	4	2	2	2	2	3	2	1	2	3	3	51
OG0001011	8	2	1	0	2	0	0	8	3	3	1	8	3	3	2	0	7	0	0	0	0	0	51
OG0001012	2	5	8	0	4	2	5	0	2	3	4	0	5	4	1	1	0	0	1	2	2	0	51
OG0001013	1	1	6	6	5	4	6	1	3	1	1	3	1	3	1	1	1	1	0	4	1	0	51
OG0001014	6	0	3	0	1	0	0	0	7	0	2	0	3	5	7	6	8	2	0	0	1	0	51
OG0001015	4	1	0	0	1	4	0	0	5	1	0	0	4	23	2	1	0	5	0	0	0	0	51
OG0001016	2	4	4	2	2	2	1	2	3	2	3	3	3	3	3	2	2	3	1	2	1	1	51
OG0001017	1	5	2	0	11	0	3	0	1	2	12	0	5	0	1	1	0	6	0	0	1	0	51
OG0001018	2	1	1	2	1	4	1	3	2	1	1	2	1	1	6	1	2	3	2	10	3	1	51
OG0001019	4	2	3	2	1	0	1	3	7	2	1	1	4	1	2	2	2	6	1	1	2	3	51
OG0001020	2	3	4	4	3	2	1	3	3	4	3	2	2	2	0	2	1	2	0	3	5	0	51
OG0001021	2	3	1	2	4	0	2	3	2	2	2	3	3	3	8	1	2	1	1	3	1	2	51
OG0001022	6	4	1	0	1	0	1	1	6	1	0	1	7	4	0	2	0	5	0	0	7	4	51
OG0001023	2	2	2	3	2	2	2	1	4	2	6	3	2	2	3	2	2	2	2	2	2	1	51
OG0001024	1	3	1	3	2	7	0	2	1	2	1	3	4	2	3	2	7	2	1	2	1	1	51
OG0001025	6	1	1	1	5	3	2	3	1	1	1	3	2	1	2	1	1	3	1	9	2	1	51
OG0001026	2	2	1	2	1	1	2	2	3	2	4	3	3	5	3	3	2	2	1	3	3	1	51
OG0001027	1	1	3	1	7	1	3	1	2	1	7	2	1	2	5	1	2	2	1	3	3	1	51
OG0001028	1	2	1	0	9	3	6	3	1	1	2	3	1	1	1	1	1	1	2	8	2	1	51
OG0001029	1	2	2	1	6	1	2	2	2	3	3	2	1	4	3	2	2	1	2	7	1	1	51
OG0001030	0	7	0	0	4	0	0	0	3	10	0	0	14	0	0	12	1	0	0	0	0	0	51
OG0001031	0	5	4	4	4	0	5	0	4	5	4	0	1	2	0	5	2	4	0	0	2	0	51
OG0001032	0	0	49	0	0	0	0	0	0	0	2	0	0	0	0	0	0	0	0	0	0	0	51
OG0001033	0	0	1	0	0	0	0	0	0	0	0	0	0	0	0	0	0	0	0	0	0	50	51
OG0001034	0	0	0	0	51	0	0	0	0	0	0	0	0	0	0	0	0	0	0	0	0	0	51
OG0001035	0	0	0	0	0	0	0	0	0	0	0	0	0	0	0	0	0	0	0	51	0	0	51
OG0001036	4	3	1	2	4	4	1	1	2	0	2	1	1	2	8	2	3	2	1	3	2	1	50
OG0001037	1	1	1	2	9	2	4	3	1	2	1	4	2	1	5	1	1	1	4	2	1	1	50
OG0001038	7	0	2	0	0	0	0	0	4	3	26	0	0	0	5	0	0	2	0	0	1	0	50
OG0001039	1	2	4	3	4	1	3	4	1	2	2	4	2	4	2	2	2	2	2	0	2	1	50
OG0001040	2	2	2	2	4	0	1	1	3	3	3	3	2	5	3	3	2	1	1	4	2	1	50
OG0001041	2	3	2	2	3	1	2	5	2	3	2	4	2	2	2	2	2	2	2	1	2	2	50
OG0001042	1	2	1	2	7	1	2	2	1	3	2	1	2	4	1	1	2	2	1	3	0	9	50
OG0001043	7	1	12	1	8	1	2	0	1	2	2	0	2	2	1	3	1	2	1	0	0	1	50
OG0001044	1	3	1	1	5	2	2	2	1	2	4	2	1	2	5	1	2	1	1	6	3	2	50
OG0001045	2	1	4	1	3	3	4	4	4	1	2	4	1	4	3	2	3	2	2	0	0	0	50
OG0001046	2	3	4	2	4	1	2	2	3	1	0	1	3	2	5	3	2	1	1	2	2	4	50
OG0001047	2	2	3	0	4	3	3	2	2	4	1	3	2	0	2	1	1	3	3	6	2	1	50
OG0001048	5	1	1	1	1	3	1	1	1	2	3	1	14	1	1	3	1	2	2	1	3	1	50
OG0001049	2	1	2	2	1	3	4	4	2	1	2	4	2	2	2	2	2	2	1	7	1	1	50
OG0001050	2	0	19	0	0	0	0	0	0	1	0	0	0	25	0	0	0	3	0	0	0	0	50
OG0001051	4	1	1	2	2	2	2	3	2	2	2	1	1	4	3	2	1	3	3	5	2	2	50
OG0001052	2	3	1	1	5	3	3	3	1	3	1	4	4	3	3	2	1	1	1	3	2	0	50
OG0001053	2	2	3	2	2	3	2	2	3	2	2	4	2	2	2	2	2	2	2	3	2	2	50
OG0001054	1	3	1	1	1	5	2	2	1	4	4	3	5	2	1	2	1	1	3	6	0	1	50
OG0001055	1	0	1	1	10	0	2	3	1	0	5	7	1	2	4	2	0	2	1	0	6	1	50
OG0001056	1	0	6	1	4	1	1	2	3	3	2	1	2	4	3	1	2	1	2	8	1	1	50
OG0001057	2	3	3	2	2	2	2	2	2	2	1	2	3	5	3	2	2	2	2	2	2	2	50
OG0001058	1	3	1	1	5	3	4	5	1	1	1	6	3	1	5	1	1	1	2	2	1	1	50
OG0001059	3	2	2	1	4	1	1	4	2	2	2	4	2	2	4	2	2	2	3	1	2	2	50
OG0001060	1	0	1	0	3	0	0	1	2	0	1	1	13	6	7	2	0	1	0	1	10	0	50
OG0001061	3	1	2	5	5	0	0	2	3	7	2	2	1	1	1	2	4	4	2	0	1	2	50
OG0001062	1	1	1	1	8	0	2	3	1	1	1	10	1	2	0	1	2	7	1	4	1	1	50
OG0001063	1	3	1	1	2	1	6	3	2	2	6	3	0	2	3	2	2	2	1	3	3	1	50
OG0001064	2	1	2	2	7	1	3	5	3	2	2	4	1	2	5	1	1	1	1	2	1	1	50
OG0001065	1	2	3	3	4	1	4	2	3	2	3	1	2	1	3	2	2	1	1	6	2	1	50
OG0001066	3	0	0	0	25	0	0	0	1	0	15	0	0	0	5	0	0	1	0	0	0	0	50
OG0001067	1	1	1	2	3	5	2	5	2	2	1	5	6	2	2	1	1	1	1	3	0	3	50
OG0001068	3	1	1	2	6	1	4	3	1	1	2	3	3	2	4	1	1	2	1	6	1	1	50
OG0001069	0	2	3	1	13	0	16	0	2	1	3	0	1	2	0	1	0	0	1	2	1	1	50
OG0001070	0	2	1	1	4	5	5	3	2	1	1	3	1	3	1	1	1	1	1	8	4	1	50
OG0001071	0	3	17	0	2	0	3	0	0	3	12	0	10	0	0	0	0	0	0	0	0	0	50
OG0001072	0	3	25	2	3	0	2	0	1	1	0	0	1	0	0	9	3	0	0	0	0	0	50
OG0001073	0	2	2	2	3	1	1	3	4	3	3	3	3	4	0	2	3	1	4	2	1	3	50
OG0001074	0	0	49	0	0	0	0	0	0	0	0	0	0	1	0	0	0	0	0	0	0	0	50
OG0001075	0	0	1	0	3	0	0	0	0	0	0	0	40	0	0	0	0	0	4	0	2	0	50
OG0001076	0	0	0	0	49	0	0	0	0	0	0	0	0	0	0	0	0	1	0	0	0	0	50
OG0001077	0	0	0	0	0	50	0	0	0	0	0	0	0	0	0	0	0	0	0	0	0	0	50
OG0001078	0	0	0	0	0	0	50	0	0	0	0	0	0	0	0	0	0	0	0	0	0	0	50
OG0001079	0	0	0	0	0	0	0	3	0	0	0	46	0	0	0	0	0	1	0	0	0	0	50
OG0001080	3	3	2	2	2	2	1	3	2	2	2	3	2	2	3	2	3	2	3	1	2	2	49
OG0001081	4	3	4	4	0	0	1	0	2	1	9	0	2	2	8	2	2	2	0	1	2	0	49
OG0001082	40	0	1	0	0	0	0	0	0	0	1	0	1	0	1	2	0	3	0	0	0	0	49
OG0001083	2	1	3	2	2	2	1	2	3	2	2	2	1	4	2	2	2	3	2	5	2	2	49
OG0001084	7	1	25	0	0	9	0	0	0	0	0	0	0	0	0	1	0	0	0	2	0	4	49
OG0001085	2	2	1	1	3	1	2	2	2	1	1	1	2	4	3	2	1	2	1	3	11	1	49
OG0001086	1	1	2	1	3	0	0	3	9	4	3	2	0	5	1	8	6	0	0	0	0	0	49
OG0001087	2	2	2	1	3	1	2	3	2	2	2	3	2	2	2	2	2	2	6	2	2	2	49
OG0001088	2	1	2	1	2	2	0	5	3	2	3	7	3	3	3	2	2	1	2	0	1	2	49
OG0001089	1	4	3	1	1	1	1	2	1	4	11	2	0	1	5	0	2	1	0	2	5	1	49
OG0001090	1	2	4	3	4	2	2	0	2	3	3	0	2	1	0	5	3	6	2	1	2	1	49
OG0001091	3	2	2	2	3	1	3	4	1	3	3	5	1	3	3	2	1	1	2	1	1	2	49
OG0001092	1	0	2	1	8	4	4	4	1	2	2	4	1	4	2	1	1	2	1	3	0	1	49
OG0001093	1	0	2	2	3	8	3	2	7	2	1	2	2	2	2	1	2	2	0	0	5	0	49
OG0001094	1	1	1	1	5	3	5	4	1	1	1	3	1	3	1	2	2	1	3	4	2	3	49
OG0001095	2	1	2	1	6	1	4	2	1	2	1	4	1	2	6	1	2	1	4	2	1	2	49
OG0001096	1	2	4	1	5	1	2	3	3	2	2	4	2	3	1	2	3	2	2	2	1	1	49
OG0001097	1	3	1	1	5	3	1	4	1	3	2	2	3	2	5	1	2	2	2	1	3	1	49
OG0001098	2	1	1	1	9	5	5	3	2	2	2	5	1	1	2	1	2	1	1	0	1	1	49
OG0001099	1	1	1	1	3	1	10	4	2	1	1	3	1	3	1	1	1	1	1	9	1	1	49
OG0001100	1	7	0	0	0	1	0	3	2	0	0	4	6	1	4	8	1	2	2	0	6	1	49
OG0001101	3	3	4	2	3	0	1	0	1	6	3	1	4	7	0	3	1	4	0	2	0	1	49
OG0001102	3	3	3	2	1	0	1	1	5	2	3	1	5	7	2	1	4	2	2	1	0	0	49
OG0001103	2	2	2	1	4	2	1	2	4	2	2	2	2	3	3	3	2	4	1	1	3	1	49
OG0001104	2	2	2	2	4	2	3	4	2	2	2	3	2	4	2	2	2	1	2	0	2	2	49
OG0001105	1	2	11	5	5	1	2	0	3	1	10	1	1	0	0	1	1	1	1	1	0	1	49
OG0001106	1	2	3	1	1	2	1	3	1	3	3	3	4	3	3	1	1	2	0	4	6	1	49
OG0001107	1	1	1	1	6	1	4	4	6	1	2	3	1	2	2	1	2	3	1	1	3	2	49
OG0001108	4	1	5	2	3	0	2	0	11	1	2	0	1	1	0	8	6	1	0	0	0	1	49
OG0001109	5	2	2	5	2	0	0	1	4	1	4	1	2	3	1	2	1	10	1	2	0	0	49
OG0001110	1	1	2	2	3	2	3	2	4	3	3	2	2	3	2	2	2	2	1	2	3	2	49
OG0001111	4	3	1	1	7	3	4	2	4	1	1	2	1	2	2	1	3	1	1	2	2	1	49
OG0001112	1	7	1	0	2	2	0	1	8	0	0	1	8	4	4	2	8	0	0	0	0	0	49
OG0001113	1	3	1	2	5	4	4	0	2	1	3	2	2	3	0	3	1	6	3	0	1	2	49
OG0001114	0	16	7	2	7	0	0	0	0	0	0	0	8	0	0	8	0	0	0	1	0	0	49
OG0001115	0	1	1	0	1	2	0	0	2	0	2	1	1	0	0	2	1	2	28	0	2	3	49
OG0001116	0	2	0	0	47	0	0	0	0	0	0	0	0	0	0	0	0	0	0	0	0	0	49
OG0001117	0	1	1	1	5	5	5	4	1	1	1	4	2	2	1	1	1	1	2	8	1	1	49
OG0001118	0	0	49	0	0	0	0	0	0	0	0	0	0	0	0	0	0	0	0	0	0	0	49
OG0001119	0	0	8	5	18	3	6	1	1	0	5	0	0	1	0	0	0	0	0	0	0	1	49
OG0001120	0	0	0	0	22	19	8	0	0	0	0	0	0	0	0	0	0	0	0	0	0	0	49
OG0001121	0	0	0	0	49	0	0	0	0	0	0	0	0	0	0	0	0	0	0	0	0	0	49
OG0001122	0	0	0	0	0	0	0	0	0	0	0	0	0	0	0	2	0	47	0	0	0	0	49
OG0001123	0	0	0	0	0	0	0	0	0	0	0	0	0	0	0	0	0	49	0	0	0	0	49
OG0001124	0	0	0	0	0	0	0	0	0	0	0	0	0	0	0	0	0	0	0	0	0	49	49
OG0001125	44	0	1	0	0	0	0	0	0	1	0	0	0	1	0	1	0	0	0	0	0	0	48
OG0001126	31	0	0	0	0	0	0	0	0	0	0	0	0	0	2	0	0	15	0	0	0	0	48
OG0001127	2	1	3	3	5	1	2	1	2	2	8	2	2	2	1	2	2	1	3	0	2	1	48
OG0001128	14	2	1	1	2	3	3	2	2	2	1	2	1	2	0	1	4	1	0	1	2	1	48
OG0001129	6	1	2	2	3	0	1	0	5	2	2	1	1	3	1	2	4	1	4	3	1	3	48
OG0001130	1	1	0	0	0	0	0	0	0	3	0	0	42	0	1	0	0	0	0	0	0	0	48
OG0001131	1	1	1	1	6	3	2	4	2	1	2	4	1	2	3	1	1	2	1	6	2	1	48
OG0001132	4	1	2	1	3	1	1	2	5	2	2	2	2	4	3	2	3	1	3	1	2	1	48
OG0001133	2	1	7	3	6	0	0	0	0	2	12	0	0	0	0	11	0	2	0	0	2	0	48
OG0001134	3	2	1	1	4	1	2	2	3	2	4	1	2	3	2	1	3	4	0	4	2	1	48
OG0001135	1	1	3	4	4	1	2	1	5	1	1	1	4	4	2	2	3	2	1	2	1	2	48
OG0001136	11	3	3	1	0	0	0	0	6	4	2	0	3	4	0	1	1	5	2	0	1	1	48
OG0001137	2	4	3	0	4	2	1	2	3	2	1	1	4	4	2	3	3	2	1	2	2	0	48
OG0001138	6	3	6	3	5	0	0	0	5	1	0	0	5	0	0	2	7	3	0	0	2	0	48
OG0001139	1	3	2	2	3	1	1	2	2	2	4	2	3	2	2	3	2	3	0	4	2	2	48
OG0001140	4	1	0	0	8	0	0	2	0	0	5	5	4	0	0	0	9	4	0	0	6	0	48
OG0001141	5	4	4	3	2	1	1	1	5	3	3	1	1	3	1	1	2	1	0	4	1	1	48
OG0001142	2	1	1	1	1	7	0	2	1	2	2	2	2	4	2	1	1	1	2	4	6	3	48
OG0001143	1	1	2	2	3	1	3	7	2	1	1	3	1	3	3	2	1	2	2	2	3	2	48
OG0001144	1	1	2	1	10	1	4	2	2	2	2	3	1	3	1	1	2	1	1	5	1	1	48
OG0001145	1	1	1	0	4	2	6	2	3	1	2	2	1	4	2	1	1	1	2	8	2	1	48
OG0001146	1	1	1	2	5	1	5	3	2	2	4	3	3	1	1	6	1	1	1	2	1	1	48
OG0001147	4	6	5	1	1	1	1	1	1	1	5	2	5	4	4	1	2	1	0	0	2	0	48
OG0001148	2	2	3	1	3	3	2	4	2	2	2	2	2	3	1	1	2	2	1	4	2	2	48
OG0001149	2	1	2	3	3	1	3	4	2	2	2	4	2	3	3	1	2	2	2	1	2	1	48
OG0001150	1	1	3	3	3	2	3	2	1	2	1	2	2	2	2	1	2	3	2	7	1	2	48
OG0001151	2	2	4	2	3	1	2	3	2	3	2	2	2	2	2	2	2	2	1	4	2	1	48
OG0001152	1	2	1	1	1	5	1	4	5	1	1	2	1	2	3	1	2	2	1	2	2	7	48
OG0001153	1	1	1	4	10	2	3	3	1	1	1	5	1	1	1	2	1	1	2	5	1	0	48
OG0001154	2	2	9	2	7	0	2	0	0	1	11	0	4	1	0	0	1	5	0	0	1	0	48
OG0001155	1	2	3	1	1	3	1	1	4	2	7	2	2	2	1	2	3	1	1	4	3	1	48
OG0001156	2	2	2	0	4	0	2	3	3	3	3	3	2	2	2	2	1	1	2	6	1	2	48
OG0001157	2	0	0	0	0	0	0	0	2	0	43	0	0	0	0	0	1	0	0	0	0	0	48
OG0001158	7	1	2	1	1	2	3	2	2	1	2	2	1	8	0	1	1	1	2	3	4	1	48
OG0001159	0	7	3	3	6	0	3	0	5	2	1	0	2	4	0	3	1	0	1	6	0	1	48
OG0001160	0	2	2	2	3	1	1	2	2	2	2	2	2	5	3	1	3	2	2	5	3	1	48
OG0001161	0	4	10	0	16	0	0	0	10	2	0	0	1	0	0	0	5	0	0	0	0	0	48
OG0001162	0	1	1	1	3	1	2	4	3	3	2	6	1	2	3	2	1	3	1	5	2	1	48
OG0001163	0	0	0	0	0	0	0	0	0	0	48	0	0	0	0	0	0	0	0	0	0	0	48
OG0001164	0	0	0	0	0	0	0	0	0	0	0	0	0	0	0	0	0	0	0	48	0	0	48
OG0001165	4	1	1	1	11	0	5	0	1	1	1	0	1	2	0	2	1	0	0	15	0	0	47
OG0001166	1	1	1	1	1	2	2	3	6	1	1	3	5	3	3	1	2	1	1	6	1	1	47
OG0001167	2	2	1	1	2	3	2	2	1	1	1	3	1	2	3	1	2	6	2	4	4	1	47
OG0001168	2	1	2	2	3	2	2	2	2	2	2	2	1	4	2	2	2	2	3	3	2	2	47
OG0001169	16	1	0	0	0	0	0	5	4	0	0	5	1	0	0	4	1	6	0	0	4	0	47
OG0001170	3	1	2	0	3	1	1	6	2	2	2	5	3	2	3	2	2	1	2	1	2	1	47
OG0001171	3	1	1	2	3	2	1	3	2	1	2	2	4	2	1	1	2	1	1	8	2	2	47
OG0001172	2	1	1	0	1	3	1	9	0	2	1	10	1	4	1	1	1	2	1	1	2	2	47
OG0001173	4	1	4	1	1	1	0	0	12	0	3	0	4	0	0	7	5	0	0	4	0	0	47
OG0001174	5	5	3	2	2	0	1	1	4	1	2	1	2	2	2	2	4	6	0	2	0	0	47
OG0001175	4	2	1	1	2	1	3	3	2	1	0	2	6	3	4	1	2	1	1	2	4	1	47
OG0001176	10	0	0	0	0	5	0	5	0	0	0	4	0	0	1	0	0	9	0	0	13	0	47
OG0001177	3	4	4	3	0	1	0	1	1	3	1	1	3	0	4	3	0	6	1	4	4	0	47
OG0001178	9	1	0	0	0	0	0	8	2	0	1	7	3	0	1	0	9	6	0	0	0	0	47
OG0001179	5	1	2	1	1	1	3	2	1	1	3	4	2	1	10	1	1	3	1	0	2	1	47
OG0001180	5	4	1	0	3	0	1	2	1	4	0	2	4	2	8	3	2	1	1	1	1	1	47
OG0001181	1	0	0	0	0	0	0	0	0	0	0	0	0	0	0	0	0	0	0	0	46	0	47
OG0001182	3	1	2	2	2	2	2	3	2	2	3	1	3	2	2	3	1	4	2	1	3	1	47
OG0001183	2	1	2	2	1	2	2	3	2	2	2	3	3	2	2	2	2	2	2	2	3	3	47
OG0001184	1	2	1	3	7	0	9	2	2	2	1	2	2	1	2	1	1	2	1	2	2	1	47
OG0001185	2	1	2	0	2	1	3	3	2	2	6	2	2	5	1	2	2	2	1	2	2	2	47
OG0001186	1	1	2	3	3	4	1	3	2	2	2	3	2	3	1	2	2	2	2	1	1	4	47
OG0001187	2	2	2	2	2	2	1	2	3	2	2	2	2	2	2	2	3	2	3	3	1	3	47
OG0001188	2	1	1	1	8	1	8	4	2	1	2	3	1	2	1	1	1	2	1	3	0	1	47
OG0001189	1	4	3	2	3	2	1	1	2	2	8	1	6	3	0	1	2	1	1	1	1	1	47
OG0001190	1	3	2	1	4	1	4	3	1	1	4	4	1	2	2	1	1	1	1	6	2	1	47
OG0001191	1	1	2	1	4	2	3	2	2	1	2	2	3	3	2	2	2	3	3	2	3	1	47
OG0001192	3	2	1	0	4	2	1	5	3	2	1	3	2	1	3	0	3	4	2	1	3	1	47
OG0001193	1	2	1	2	5	3	1	6	1	2	1	4	2	2	2	3	1	2	1	0	3	2	47
OG0001194	2	2	1	2	2	1	1	1	4	2	5	1	2	4	2	2	2	4	1	0	5	1	47
OG0001195	1	1	1	1	7	3	2	3	6	1	1	3	1	1	2	1	1	1	3	3	1	3	47
OG0001196	1	3	1	1	6	2	5	4	1	3	1	4	2	1	2	1	1	1	1	3	2	1	47
OG0001197	1	2	2	0	5	0	2	2	3	2	2	2	2	4	1	2	3	0	1	7	4	0	47
OG0001198	1	2	2	1	2	2	1	3	2	2	2	3	2	7	4	2	2	2	1	1	1	2	47
OG0001199	1	2	2	2	3	0	4	2	4	2	1	2	1	4	1	2	2	1	3	6	1	1	47
OG0001200	5	4	2	1	1	0	0	1	3	1	1	1	4	6	2	1	6	2	1	0	5	0	47
OG0001201	2	2	8	14	3	0	1	0	0	5	0	0	4	0	0	1	0	5	0	1	1	0	47
OG0001202	0	46	0	0	0	0	0	0	0	0	0	0	0	0	0	1	0	0	0	0	0	0	47
OG0001203	0	12	1	0	0	0	0	1	4	3	0	3	4	3	1	2	2	0	5	6	0	0	47
OG0001204	0	0	21	0	23	0	0	0	0	0	2	0	0	0	0	1	0	0	0	0	0	0	47
OG0001205	0	0	0	0	0	0	0	0	2	0	0	0	0	0	0	0	0	0	34	0	0	11	47
OG0001206	0	0	0	0	0	0	0	0	0	0	0	0	47	0	0	0	0	0	0	0	0	0	47
OG0001207	0	0	0	0	0	0	0	0	0	0	0	0	0	47	0	0	0	0	0	0	0	0	47
OG0001208	0	0	0	0	0	0	0	0	0	0	0	0	0	0	0	0	0	0	0	0	0	47	47
OG0001209	46	0	0	0	0	0	0	0	0	0	0	0	0	0	0	0	0	0	0	0	0	0	46
OG0001210	43	2	0	0	0	1	0	0	0	0	0	0	0	0	0	0	0	0	0	0	0	0	46
OG0001211	1	2	3	1	2	2	4	2	3	2	1	2	2	4	4	1	2	2	1	3	1	1	46
OG0001212	4	2	2	1	3	3	1	1	2	2	1	1	2	1	1	3	1	9	1	1	3	1	46
OG0001213	6	3	2	1	6	1	0	0	2	4	7	0	3	2	1	2	3	2	0	0	1	0	46
OG0001214	1	3	1	1	5	3	5	2	1	3	2	2	3	0	5	1	1	2	2	1	0	2	46
OG0001215	4	3	3	2	2	0	2	0	5	2	0	0	2	4	0	3	2	2	2	3	2	3	46
OG0001216	5	2	3	1	1	0	4	1	2	1	1	1	1	3	3	1	1	1	0	5	9	0	46
OG0001217	1	2	5	1	6	1	2	2	2	1	2	2	2	3	1	2	3	1	1	1	2	3	46
OG0001218	2	3	2	2	3	1	2	4	3	1	1	3	1	4	2	2	1	3	1	1	3	1	46
OG0001219	3	3	3	1	2	2	4	4	2	1	1	6	1	3	2	1	1	0	2	1	2	1	46
OG0001220	2	2	2	2	3	2	1	4	3	1	2	3	3	3	3	2	2	2	1	1	2	0	46
OG0001221	3	3	2	1	6	1	2	1	3	3	1	1	1	4	0	3	2	2	3	2	0	2	46
OG0001222	3	1	0	3	3	0	9	2	2	2	2	3	2	3	0	4	2	1	1	1	1	1	46
OG0001223	1	1	1	2	2	5	2	1	3	1	1	1	1	2	1	1	2	1	1	13	2	1	46
OG0001224	2	1	3	1	2	1	2	2	2	2	2	2	2	3	2	2	2	2	2	3	4	2	46
OG0001225	4	2	4	0	6	0	2	1	2	1	0	2	2	0	0	1	2	11	0	0	5	1	46
OG0001226	2	2	2	1	3	1	2	3	3	2	2	4	3	4	1	2	2	2	2	1	1	1	46
OG0001227	1	6	1	3	3	3	2	3	1	1	2	2	2	3	2	1	2	1	2	2	2	1	46
OG0001228	1	7	3	1	2	1	2	1	4	2	1	1	2	4	1	3	4	1	1	1	1	2	46
OG0001229	6	5	0	0	0	1	0	1	7	4	0	1	7	3	1	4	3	1	0	0	2	0	46
OG0001230	1	1	3	1	11	2	3	4	2	1	1	4	1	1	1	1	1	1	1	3	1	1	46
OG0001231	2	0	6	0	12	0	8	0	7	0	5	0	0	0	0	6	0	0	0	0	0	0	46
OG0001232	1	1	1	1	1	0	0	7	2	1	3	5	1	3	1	1	1	2	2	11	1	0	46
OG0001233	2	3	2	1	3	1	2	2	2	2	1	2	2	3	2	2	2	4	2	2	2	2	46
OG0001234	2	1	6	4	2	0	2	0	2	2	2	0	1	4	2	9	2	1	1	2	0	1	46
OG0001235	1	1	1	2	4	1	3	3	1	1	3	3	1	4	2	1	1	1	1	8	2	1	46
OG0001236	1	1	1	0	4	5	3	3	1	1	1	4	1	2	1	1	1	1	2	8	1	3	46
OG0001237	4	1	1	0	1	2	1	1	3	3	1	1	3	7	1	3	2	5	1	1	2	2	46
OG0001238	1	2	1	1	7	1	5	2	4	2	3	2	2	2	1	1	1	3	1	1	1	2	46
OG0001239	1	3	2	2	7	1	2	1	7	1	2	2	3	1	0	2	2	1	1	3	2	0	46
OG0001240	3	1	2	3	1	5	1	1	1	2	3	1	1	3	1	1	1	2	3	0	1	9	46
OG0001241	1	1	1	1	1	4	1	3	1	1	1	3	2	3	4	3	2	6	2	1	2	2	46
OG0001242	0	7	1	1	1	0	1	0	1	0	1	0	21	2	0	1	4	0	2	2	0	1	46
OG0001243	0	1	1	1	7	1	6	3	1	2	1	3	1	3	1	1	1	1	1	8	1	1	46
OG0001244	0	2	0	0	0	0	0	0	1	0	0	0	0	17	5	0	3	18	0	0	0	0	46
OG0001245	0	0	1	0	8	8	0	1	0	0	0	3	9	0	0	1	0	0	1	5	8	1	46
OG0001246	0	0	1	0	0	0	0	0	0	0	0	0	0	45	0	0	0	0	0	0	0	0	46
OG0001247	0	0	1	0	0	1	0	0	0	0	0	0	0	0	0	0	0	44	0	0	0	0	46
OG0001248	0	0	0	0	0	46	0	0	0	0	0	0	0	0	0	0	0	0	0	0	0	0	46
OG0001249	0	0	0	0	0	0	0	0	0	0	0	0	0	22	0	0	13	0	0	0	10	1	46
OG0001250	3	1	2	1	3	0	3	6	2	2	2	3	3	1	0	1	2	1	2	5	1	1	45
OG0001251	2	1	1	2	0	2	0	3	2	1	1	4	2	5	2	0	1	1	3	6	1	5	45
OG0001252	3	1	2	2	1	2	2	2	4	1	2	2	3	7	1	1	1	1	1	2	3	1	45
OG0001253	1	5	2	2	2	4	1	1	1	1	2	1	2	2	1	1	1	4	1	7	2	1	45
OG0001254	2	2	2	2	3	1	2	1	2	2	1	1	2	5	3	2	2	4	1	2	2	1	45
OG0001255	2	3	2	2	1	0	0	3	3	2	2	3	2	4	3	2	2	2	1	1	3	2	45
OG0001256	1	1	2	1	8	0	5	2	1	2	2	2	1	3	4	1	1	1	1	3	2	1	45
OG0001257	1	1	1	1	4	1	3	3	4	1	2	2	1	1	2	1	1	1	1	10	1	2	45
OG0001258	2	2	2	1	3	0	1	4	2	2	3	3	4	3	2	1	2	2	0	2	1	3	45
OG0001259	1	1	1	1	13	0	2	3	1	1	2	5	1	1	0	2	1	1	1	4	2	1	45
OG0001260	2	2	2	2	3	0	2	2	3	2	2	3	1	3	3	1	2	1	1	3	2	3	45
OG0001261	2	2	3	2	2	2	1	2	4	2	1	2	1	4	1	2	2	3	2	1	2	2	45
OG0001262	3	1	2	1	2	2	1	1	2	1	5	1	1	10	1	1	2	1	2	1	2	2	45
OG0001263	1	0	0	0	0	0	43	0	0	0	0	0	0	0	0	1	0	0	0	0	0	0	45
OG0001264	6	2	9	1	1	0	0	0	5	3	2	3	2	3	4	1	0	2	0	0	1	0	45
OG0001265	1	1	1	1	0	6	0	1	1	1	2	3	2	5	7	2	3	5	1	0	1	1	45
OG0001266	2	2	3	3	1	1	2	0	2	2	2	2	2	4	3	2	2	2	2	2	2	2	45
OG0001267	1	1	2	1	1	1	1	2	1	4	1	2	1	4	3	1	1	1	2	9	4	1	45
OG0001268	8	1	1	2	1	0	2	5	3	1	3	5	1	2	2	2	1	2	1	0	1	1	45
OG0001269	2	2	2	2	1	2	1	2	3	2	2	3	1	5	4	2	2	2	2	0	1	2	45
OG0001270	1	1	1	1	2	2	2	3	2	1	4	4	1	1	3	2	1	1	1	9	1	1	45
OG0001271	4	3	2	1	2	1	2	2	2	3	1	2	1	2	1	1	1	4	4	3	2	1	45
OG0001272	1	1	3	1	2	1	2	2	2	2	2	1	2	4	3	2	2	1	5	2	2	2	45
OG0001273	1	2	3	1	1	1	2	2	3	2	2	2	1	2	4	1	2	2	2	3	4	2	45
OG0001274	2	2	3	2	1	2	2	2	3	2	2	1	3	2	3	2	2	2	2	3	1	1	45
OG0001275	4	2	1	2	2	1	1	3	3	3	1	3	2	4	3	2	2	2	2	0	1	1	45
OG0001276	1	1	1	3	7	2	3	2	2	1	2	2	3	2	2	2	1	2	1	4	1	0	45
OG0001277	4	1	2	1	5	1	2	3	1	2	6	3	1	2	0	1	1	1	1	1	2	4	45
OG0001278	2	2	2	1	1	3	0	1	3	6	3	1	3	4	1	3	3	1	1	3	1	0	45
OG0001279	2	1	1	0	1	1	2	1	10	3	2	1	2	2	2	2	0	2	2	0	7	1	45
OG0001280	2	1	3	0	3	3	1	2	0	3	0	0	2	2	2	0	1	2	4	12	1	1	45
OG0001281	2	2	1	1	2	1	1	4	3	2	2	4	2	4	3	2	3	4	1	0	1	0	45
OG0001282	1	1	1	2	5	1	5	5	1	2	2	5	1	1	2	1	1	1	1	3	1	2	45
OG0001283	1	1	0	1	3	1	2	4	1	1	1	3	1	2	2	1	1	3	1	10	3	2	45
OG0001284	2	0	5	1	1	1	1	1	2	1	12	2	2	6	1	2	1	1	1	1	1	0	45
OG0001285	1	5	1	1	1	2	4	1	4	1	4	1	2	3	1	3	2	2	1	2	1	2	45
OG0001286	1	2	2	1	3	2	4	3	3	3	1	3	1	3	0	1	3	1	1	4	2	1	45
OG0001287	2	2	2	1	3	1	3	1	3	2	2	2	2	2	4	2	4	3	1	0	2	1	45
OG0001288	1	1	1	1	5	3	4	5	2	1	1	4	1	2	1	1	2	1	1	4	2	1	45
OG0001289	1	1	2	4	6	1	5	4	1	2	2	4	1	1	1	1	1	1	1	4	0	1	45
OG0001290	2	8	1	0	1	0	2	1	1	4	1	1	5	10	0	0	0	4	2	0	1	1	45
OG0001291	1	1	2	2	10	0	6	0	2	2	1	0	3	3	0	1	0	0	0	11	0	0	45
OG0001292	1	1	1	2	6	2	10	3	1	1	3	3	1	1	1	1	1	1	1	2	1	1	45
OG0001293	1	1	1	1	2	2	1	1	1	1	5	1	2	4	2	2	1	1	1	3	1	10	45
OG0001294	3	10	4	0	0	0	0	0	0	3	9	0	3	6	0	4	0	3	0	0	0	0	45
OG0001295	1	1	1	1	1	6	1	4	2	1	1	6	1	2	1	1	1	2	2	6	2	1	45
OG0001296	1	2	4	2	4	1	2	2	3	3	2	2	1	2	1	2	2	3	3	0	1	2	45
OG0001297	2	2	2	0	7	3	4	3	1	1	3	3	1	2	1	1	1	1	2	3	1	1	45
OG0001298	1	1	2	2	5	0	4	3	1	1	2	3	1	2	3	1	1	1	1	8	1	1	45
OG0001299	2	1	1	1	7	1	4	4	2	2	2	4	1	2	1	1	1	1	2	3	1	1	45
OG0001300	1	3	1	1	1	1	2	1	3	1	1	1	2	2	3	1	2	1	1	13	2	1	45
OG0001301	2	1	2	1	2	3	4	1	3	2	1	1	1	3	1	1	1	1	1	10	2	1	45
OG0001302	0	3	2	1	2	0	0	0	4	2	0	0	2	4	0	20	3	2	0	0	0	0	45
OG0001303	0	1	8	5	1	0	17	0	2	1	1	0	3	1	0	1	1	0	0	3	0	0	45
OG0001304	0	0	45	0	0	0	0	0	0	0	0	0	0	0	0	0	0	0	0	0	0	0	45
OG0001305	0	0	38	0	2	0	1	0	1	1	1	0	0	0	0	0	1	0	0	0	0	0	45
OG0001306	0	0	2	0	0	0	0	0	0	0	0	0	0	0	0	37	1	5	0	0	0	0	45
OG0001307	0	0	0	0	43	0	2	0	0	0	0	0	0	0	0	0	0	0	0	0	0	0	45
OG0001308	0	0	0	0	2	0	42	0	0	0	0	0	0	0	0	1	0	0	0	0	0	0	45
OG0001309	0	0	0	0	0	0	45	0	0	0	0	0	0	0	0	0	0	0	0	0	0	0	45
OG0001310	0	0	0	0	0	0	0	45	0	0	0	0	0	0	0	0	0	0	0	0	0	0	45
OG0001311	0	0	0	0	0	0	0	45	0	0	0	0	0	0	0	0	0	0	0	0	0	0	45
OG0001312	0	0	0	0	0	0	0	0	0	45	0	0	0	0	0	0	0	0	0	0	0	0	45
OG0001313	0	0	0	0	0	0	0	0	0	0	0	0	0	0	0	0	0	45	0	0	0	0	45
OG0001314	0	0	0	0	0	0	0	0	0	0	0	0	0	0	0	0	0	45	0	0	0	0	45
OG0001315	0	0	0	0	0	0	0	0	0	0	0	0	0	0	0	0	0	0	0	0	45	0	45
OG0001316	3	0	4	3	2	2	0	2	3	2	1	2	3	4	3	2	3	4	0	0	1	0	44
OG0001317	3	1	4	1	1	0	2	1	3	3	1	2	2	1	2	2	1	1	3	6	2	2	44
OG0001318	4	1	3	2	1	1	1	1	5	1	0	1	2	3	1	2	1	2	1	2	5	4	44
OG0001319	1	2	1	1	1	5	1	1	1	1	1	1	1	2	1	1	1	1	1	13	5	1	44
OG0001320	2	2	1	1	2	1	1	3	2	3	1	2	3	3	3	2	1	2	0	5	3	1	44
OG0001321	27	0	0	0	0	0	0	0	2	0	0	0	0	0	5	1	0	9	0	0	0	0	44
OG0001322	8	0	1	1	4	0	0	1	4	0	0	2	0	0	1	5	1	4	3	2	2	5	44
OG0001323	1	2	1	2	6	2	4	4	1	1	1	4	2	1	1	1	1	1	2	3	2	1	44
OG0001324	3	1	6	0	3	2	4	0	1	1	8	0	0	2	7	1	0	3	2	0	0	0	44
OG0001325	2	1	1	2	6	2	2	3	2	1	2	3	1	2	3	2	1	2	2	1	0	3	44
OG0001326	1	1	3	1	2	2	2	1	5	2	2	1	2	4	4	1	1	1	2	3	2	1	44
OG0001327	2	1	2	2	1	1	1	2	2	2	2	3	2	3	2	2	2	3	2	2	3	2	44
OG0001328	7	1	2	1	3	1	1	1	3	2	1	1	1	3	3	1	2	4	1	1	3	1	44
OG0001329	2	4	2	1	3	2	2	2	3	1	2	1	2	3	2	2	2	2	2	1	1	2	44
OG0001330	12	5	4	0	2	0	1	2	1	5	1	3	4	1	0	2	1	0	0	0	0	0	44
OG0001331	2	3	2	2	2	2	4	2	2	2	2	1	2	2	2	2	2	2	1	2	1	2	44
OG0001332	9	1	2	1	1	0	1	1	3	1	2	1	1	1	2	3	4	2	2	0	5	1	44
OG0001333	1	1	0	0	4	4	3	5	1	0	2	5	1	1	1	1	4	1	1	6	1	1	44
OG0001334	2	1	1	0	2	2	1	3	15	1	2	3	1	2	1	1	1	2	0	1	1	1	44
OG0001335	1	1	1	1	5	1	3	4	3	2	1	4	1	1	1	1	3	4	1	3	1	1	44
OG0001336	2	2	2	3	2	1	2	2	4	2	2	1	2	3	2	3	2	2	1	2	2	0	44
OG0001337	1	1	3	3	5	1	2	3	1	1	3	1	1	2	2	3	1	1	1	5	1	2	44
OG0001338	2	4	1	2	7	1	0	0	2	2	0	0	11	3	1	2	1	1	1	0	2	1	44
OG0001339	2	1	2	2	3	2	3	2	3	2	2	2	2	1	2	3	2	2	3	1	1	1	44
OG0001340	1	3	1	1	1	3	2	1	3	3	6	1	1	4	2	1	1	1	1	1	5	1	44
OG0001341	1	1	4	1	1	1	2	3	2	2	1	3	2	2	2	1	1	4	1	3	5	1	44
OG0001342	2	1	1	1	4	4	3	3	1	1	2	6	1	1	1	1	1	1	1	6	2	0	44
OG0001343	1	4	2	2	4	0	0	0	3	3	1	1	6	2	2	2	3	3	0	3	1	1	44
OG0001344	1	1	1	2	4	1	2	4	3	1	1	5	1	4	1	1	4	1	1	2	2	1	44
OG0001345	1	1	3	2	3	2	1	3	3	1	3	2	1	2	2	2	2	1	1	6	1	1	44
OG0001346	1	1	1	1	8	1	2	2	1	1	1	1	3	3	5	1	1	1	0	7	1	1	44
OG0001347	1	1	2	0	3	0	1	3	1	4	5	3	4	7	2	1	1	2	1	1	1	0	44
OG0001348	1	4	1	3	1	1	1	1	1	1	2	1	1	7	5	1	1	1	1	1	6	2	44
OG0001349	3	5	0	0	0	0	0	0	9	7	0	2	8	0	0	5	4	1	0	0	0	0	44
OG0001350	1	5	1	1	0	4	0	2	5	4	2	1	1	2	4	2	1	2	2	1	2	1	44
OG0001351	2	1	1	1	4	2	4	3	2	2	2	5	1	2	1	1	1	1	1	5	1	1	44
OG0001352	1	2	3	2	2	2	1	2	4	2	2	2	2	1	3	3	1	2	2	2	2	1	44
OG0001353	1	2	1	5	3	1	2	2	2	1	1	2	1	2	1	1	2	1	1	10	1	1	44
OG0001354	0	12	6	0	8	3	0	0	0	2	2	0	0	8	2	0	0	0	0	0	1	0	44
OG0001355	0	12	3	1	5	0	2	0	1	3	2	0	9	2	1	3	0	0	0	0	0	0	44
OG0001356	0	5	6	1	4	0	2	0	4	4	4	0	4	4	0	2	3	0	1	0	0	0	44
OG0001357	0	1	2	0	3	1	2	4	6	3	2	3	1	3	2	3	1	1	1	3	1	1	44
OG0001358	0	8	0	0	0	0	0	0	0	7	0	0	0	0	0	25	0	0	0	4	0	0	44
OG0001359	0	1	1	1	11	0	7	0	1	2	1	0	1	1	0	1	1	3	1	7	3	1	44
OG0001360	0	4	4	5	1	3	1	0	2	4	2	0	5	0	1	2	1	7	0	1	1	0	44
OG0001361	0	3	3	2	3	0	3	0	5	3	9	0	3	2	0	3	2	0	1	1	0	1	44
OG0001362	0	1	2	1	4	0	2	2	2	2	2	4	1	1	1	2	4	3	1	7	1	1	44
OG0001363	0	1	12	0	13	0	0	0	1	1	8	0	0	7	0	1	0	0	0	0	0	0	44
OG0001364	0	0	15	5	8	0	6	0	0	0	6	0	0	0	0	4	0	0	0	0	0	0	44
OG0001365	0	0	1	0	0	0	0	0	0	36	0	0	0	0	0	0	1	0	0	5	0	1	44
OG0001366	0	0	0	0	44	0	0	0	0	0	0	0	0	0	0	0	0	0	0	0	0	0	44
OG0001367	0	0	0	0	0	44	0	0	0	0	0	0	0	0	0	0	0	0	0	0	0	0	44
OG0001368	0	0	0	0	0	0	0	0	0	0	0	0	0	43	0	0	0	1	0	0	0	0	44
OG0001369	0	0	0	0	0	0	0	0	0	0	0	0	0	44	0	0	0	0	0	0	0	0	44
OG0001370	0	0	0	0	0	0	0	0	0	0	0	0	0	0	0	0	0	0	44	0	0	0	44
OG0001371	0	0	0	0	0	0	0	0	0	0	0	0	0	0	0	0	0	0	0	0	44	0	44
OG0001372	0	0	0	0	0	0	0	0	0	0	0	0	0	0	0	0	0	0	0	0	0	44	44
OG0001373	9	0	6	0	0	0	5	0	0	1	1	1	0	1	9	0	1	4	1	1	2	1	43
OG0001374	1	2	3	1	4	1	3	6	1	2	1	3	1	2	1	1	2	2	1	2	2	1	43
OG0001375	4	1	2	1	3	3	1	2	2	3	0	2	1	2	1	3	1	3	1	2	4	1	43
OG0001376	3	3	1	0	2	0	0	4	1	6	3	4	5	5	0	1	2	2	0	0	1	0	43
OG0001377	2	3	1	2	1	6	3	1	7	2	0	1	3	0	1	1	1	7	0	0	1	0	43
OG0001378	3	2	5	1	4	1	5	3	1	1	1	2	1	5	0	1	1	1	2	1	1	1	43
OG0001379	2	2	2	2	4	2	3	2	2	2	2	2	2	2	2	2	2	2	2	0	1	1	43
OG0001380	1	4	1	1	4	2	3	3	1	2	1	3	1	2	2	1	1	1	1	6	1	1	43
OG0001381	2	1	1	1	7	1	5	3	1	1	1	3	1	2	1	0	1	1	1	8	1	0	43
OG0001382	2	1	4	1	2	0	0	2	2	1	3	2	2	7	2	1	2	1	1	0	5	2	43
OG0001383	2	2	3	2	2	0	1	4	3	2	3	2	3	1	2	1	2	3	1	0	2	2	43
OG0001384	3	1	1	1	2	2	3	3	1	1	1	4	1	2	1	1	2	1	2	7	1	2	43
OG0001385	11	7	0	0	0	1	0	0	2	0	0	0	2	0	0	0	0	20	0	0	0	0	43
OG0001386	1	1	1	1	3	2	3	2	2	2	1	2	1	3	1	1	5	1	2	6	1	1	43
OG0001387	2	1	1	1	8	2	3	2	2	3	2	2	1	3	1	1	1	1	1	2	2	1	43
OG0001388	2	2	2	3	3	2	2	1	1	2	2	1	4	2	1	1	3	3	2	3	0	1	43
OG0001389	4	1	2	2	2	0	2	0	1	3	1	1	4	4	1	5	1	3	1	0	4	1	43
OG0001390	1	1	1	0	6	2	5	4	3	2	0	3	3	3	1	0	1	1	1	2	2	1	43
OG0001391	2	2	2	1	1	1	2	2	2	1	4	3	2	4	1	2	2	3	0	2	3	1	43
OG0001392	1	3	2	0	2	0	2	1	3	3	2	1	3	3	1	2	2	3	1	3	3	2	43
OG0001393	1	2	2	2	1	0	1	1	3	4	4	2	2	3	1	2	2	4	1	3	2	0	43
OG0001394	2	2	1	2	2	5	1	3	1	1	1	3	1	2	2	1	1	2	1	5	3	1	43
OG0001395	2	2	2	2	2	2	2	2	2	2	2	2	2	2	2	2	2	2	2	2	1	2	43
OG0001396	2	1	2	1	3	1	2	2	5	1	2	2	2	3	2	1	2	2	1	2	3	1	43
OG0001397	2	2	2	1	2	2	1	4	3	3	2	3	2	3	2	1	1	2	2	0	2	1	43
OG0001398	1	2	3	2	3	1	2	1	4	2	2	1	1	3	2	2	1	4	1	3	1	1	43
OG0001399	3	2	1	0	0	0	0	0	0	1	0	1	0	1	32	0	0	0	0	0	1	1	43
OG0001400	1	3	1	1	7	2	5	1	3	1	3	1	4	1	1	1	1	1	1	2	2	0	43
OG0001401	2	3	1	1	1	0	4	2	4	1	4	3	1	2	3	3	2	3	0	0	3	0	43
OG0001402	2	1	1	1	4	5	4	3	1	1	1	4	1	1	1	1	1	1	0	7	1	1	43
OG0001403	2	1	1	1	1	1	3	2	2	1	3	2	1	4	2	4	2	1	1	6	1	1	43
OG0001404	1	3	1	1	7	1	2	5	1	1	2	5	1	2	1	1	1	1	2	2	1	1	43
OG0001405	1	1	1	1	4	2	1	2	2	2	2	3	1	1	2	1	1	1	7	4	2	1	43
OG0001406	2	2	1	1	6	2	2	3	1	1	1	3	1	2	1	1	1	1	1	8	1	1	43
OG0001407	1	1	2	2	2	2	2	2	2	1	1	2	2	2	8	0	2	2	0	5	1	1	43
OG0001408	1	1	2	1	4	3	5	1	2	1	1	1	2	3	3	1	1	1	2	2	4	1	43
OG0001409	3	0	1	0	3	1	4	5	2	3	3	5	1	2	1	1	2	1	1	0	1	3	43
OG0001410	1	3	1	1	1	2	7	3	1	1	1	2	1	3	2	1	1	2	3	4	1	1	43
OG0001411	1	1	1	1	7	1	3	4	3	1	1	4	1	3	1	1	1	1	1	4	1	1	43
OG0001412	2	0	0	0	0	0	3	0	1	0	0	0	0	0	0	0	0	35	0	0	2	0	43
OG0001413	3	1	1	1	1	3	1	3	2	1	1	3	1	2	2	1	3	2	1	7	2	1	43
OG0001414	9	2	6	1	1	1	1	1	1	1	1	2	2	1	2	1	2	1	1	2	2	2	43
OG0001415	1	1	1	1	4	3	2	2	1	1	1	2	1	2	1	1	1	1	3	9	1	3	43
OG0001416	0	9	3	2	5	0	2	0	2	5	3	0	7	3	0	0	1	0	0	1	0	0	43
OG0001417	0	5	1	0	2	0	1	3	7	4	1	5	5	3	1	1	1	1	0	0	1	1	43
OG0001418	0	1	3	2	4	1	3	2	1	3	3	2	1	2	1	2	1	2	2	4	2	1	43
OG0001419	0	1	0	0	0	0	0	0	13	4	0	0	4	5	0	1	3	1	1	0	6	4	43
OG0001420	0	0	41	0	2	0	0	0	0	0	0	0	0	0	0	0	0	0	0	0	0	0	43
OG0001421	0	0	0	0	2	0	0	0	0	0	0	0	0	3	0	2	0	36	0	0	0	0	43
OG0001422	0	0	0	0	0	43	0	0	0	0	0	0	0	0	0	0	0	0	0	0	0	0	43
OG0001423	0	0	0	0	0	43	0	0	0	0	0	0	0	0	0	0	0	0	0	0	0	0	43
OG0001424	0	0	0	0	0	0	0	0	0	43	0	0	0	0	0	0	0	0	0	0	0	0	43
OG0001425	0	0	0	0	0	0	0	0	0	0	0	0	1	0	41	0	1	0	0	0	0	0	43
OG0001426	0	0	0	0	0	0	0	0	0	0	0	0	0	0	42	0	0	1	0	0	0	0	43
OG0001427	0	0	0	0	0	0	0	0	0	0	0	0	0	0	0	0	0	0	0	43	0	0	43
OG0001428	4	2	3	1	6	0	1	0	2	2	1	0	2	3	1	1	7	3	2	0	0	1	42
OG0001429	3	1	2	2	5	1	1	3	1	2	2	3	1	2	5	1	1	1	3	0	1	1	42
OG0001430	2	2	1	1	3	3	1	2	3	3	2	1	2	4	0	2	1	2	2	2	1	2	42
OG0001431	1	1	1	3	5	1	5	2	2	2	1	2	1	1	0	1	4	1	3	3	1	1	42
OG0001432	2	3	2	2	3	0	0	2	5	2	4	1	2	0	0	3	4	3	1	0	1	2	42
OG0001433	2	4	1	1	2	1	1	0	4	1	2	0	2	4	2	1	3	3	3	2	1	2	42
OG0001434	1	1	4	0	3	2	0	5	1	4	1	5	1	3	3	1	1	3	1	0	1	1	42
OG0001435	1	3	1	1	9	4	2	1	1	1	0	1	2	1	2	1	2	1	1	3	1	3	42
OG0001436	2	1	3	2	1	2	1	3	3	2	2	2	2	2	1	1	2	3	2	2	1	2	42
OG0001437	2	2	2	1	1	4	2	2	3	2	2	1	2	3	0	1	2	1	1	4	3	1	42
OG0001438	2	2	2	1	2	1	2	2	3	2	2	2	2	2	2	2	2	2	1	1	3	2	42
OG0001439	2	2	2	2	2	1	2	2	3	3	1	1	2	4	1	2	1	2	2	1	2	2	42
OG0001440	2	1	3	2	3	2	2	4	3	3	3	2	1	3	0	1	2	1	0	0	3	1	42
OG0001441	1	5	2	1	1	0	1	1	2	4	2	2	6	2	3	1	1	1	1	3	1	1	42
OG0001442	3	1	1	3	1	2	1	3	2	2	1	3	1	4	1	1	1	2	2	1	4	2	42
OG0001443	17	0	0	0	0	0	0	0	3	0	0	0	3	0	1	5	0	13	0	0	0	0	42
OG0001444	1	1	4	2	2	3	1	1	3	1	2	2	2	3	1	2	2	3	0	4	1	1	42
OG0001445	1	1	2	1	1	9	3	2	1	1	2	2	1	3	2	1	1	3	1	3	1	0	42
OG0001446	2	3	2	1	3	0	2	3	2	2	3	3	1	3	3	1	1	1	1	4	1	0	42
OG0001447	1	6	3	2	7	0	1	2	2	2	2	2	4	2	0	1	1	1	1	0	1	1	42
OG0001448	3	2	2	2	3	1	2	3	1	2	2	3	2	2	1	2	1	1	2	2	1	2	42
OG0001449	2	3	2	1	1	1	0	1	3	2	1	1	3	3	2	3	4	5	0	1	1	2	42
OG0001450	2	1	2	2	2	1	1	2	4	2	2	2	1	2	2	2	2	2	1	3	3	1	42
OG0001451	15	0	0	0	0	2	0	0	0	0	4	0	2	2	11	0	0	0	0	0	6	0	42
OG0001452	3	5	0	0	0	0	0	2	4	1	5	1	2	1	4	3	1	0	0	0	10	0	42
OG0001453	3	2	2	0	6	1	5	1	1	2	1	2	2	3	3	1	1	2	1	1	1	1	42
OG0001454	1	1	3	1	2	1	1	3	2	3	1	4	3	2	4	2	1	1	1	1	3	1	42
OG0001455	2	4	4	1	2	1	2	1	2	1	3	2	3	0	5	1	2	1	1	0	3	1	42
OG0001456	2	1	1	1	1	1	5	3	3	2	0	3	1	3	1	1	2	1	3	5	1	1	42
OG0001457	2	1	1	1	1	4	1	4	2	1	1	5	1	2	7	1	2	2	1	1	0	1	42
OG0001458	1	1	2	1	1	2	2	1	2	1	1	1	1	8	6	1	2	1	1	1	4	1	42
OG0001459	3	1	2	2	4	0	3	2	2	1	3	2	1	1	2	2	0	3	0	4	1	3	42
OG0001460	1	1	1	1	5	2	6	1	1	1	1	1	1	2	10	1	1	1	0	2	1	1	42
OG0001461	4	0	0	1	0	0	0	5	8	2	0	3	0	1	4	8	1	1	1	2	1	0	42
OG0001462	1	3	2	2	1	2	2	3	2	2	3	3	2	2	3	2	2	2	1	0	2	0	42
OG0001463	1	1	1	1	6	3	3	2	3	1	1	2	1	2	2	1	1	2	1	6	0	1	42
OG0001464	7	1	2	1	2	1	2	2	4	1	1	1	2	3	2	1	1	2	1	3	1	1	42
OG0001465	1	1	1	1	3	1	2	3	1	2	4	3	1	3	3	1	1	2	1	3	1	3	42
OG0001466	1	1	1	2	9	1	6	3	1	1	1	3	2	2	1	1	1	1	1	1	1	1	42
OG0001467	2	1	3	2	2	1	2	5	2	1	1	3	2	2	1	3	2	2	1	2	1	1	42
OG0001468	1	1	2	1	3	1	1	1	10	1	1	0	1	2	2	4	2	6	1	0	1	0	42
OG0001469	1	1	1	1	5	1	5	2	1	4	1	1	5	1	0	1	3	0	3	3	0	2	42
OG0001470	1	2	1	2	1	1	0	1	3	3	2	1	3	2	3	2	2	2	1	6	2	1	42
OG0001471	3	2	2	1	0	0	0	5	2	2	2	9	1	1	3	2	0	1	2	0	3	1	42
OG0001472	1	2	1	1	4	4	2	3	1	1	2	3	2	2	2	1	1	1	1	5	1	1	42
OG0001473	1	2	1	2	5	1	3	3	2	2	1	4	2	1	3	0	1	2	3	0	1	2	42
OG0001474	4	1	0	0	0	0	0	0	9	0	13	0	4	0	3	0	8	0	0	0	0	0	42
OG0001475	1	2	1	2	4	1	4	3	4	2	1	3	1	4	1	1	1	1	2	1	1	1	42
OG0001476	1	2	3	2	2	3	1	2	3	1	2	2	4	2	1	1	1	2	1	1	1	4	42
OG0001477	1	2	1	1	1	1	1	1	3	1	5	3	1	4	3	1	2	2	2	3	2	1	42
OG0001478	1	1	3	2	4	1	3	2	2	1	3	2	1	2	2	1	1	1	2	5	1	1	42
OG0001479	1	3	1	1	1	6	0	0	3	1	3	2	2	4	3	1	4	2	0	1	3	0	42
OG0001480	2	1	2	2	2	4	2	4	2	2	2	5	1	1	2	1	1	2	1	1	1	1	42
OG0001481	2	1	2	1	2	1	4	2	2	3	1	2	1	3	6	1	2	1	1	1	2	1	42
OG0001482	2	1	1	2	4	2	3	4	1	1	1	4	1	4	1	1	1	1	1	3	1	2	42
OG0001483	1	1	1	1	11	1	4	1	2	1	1	2	1	2	1	1	1	2	0	3	1	3	42
OG0001484	2	1	1	1	5	1	3	4	1	2	2	4	1	1	1	1	2	1	1	5	1	1	42
OG0001485	1	0	0	0	0	0	0	1	0	1	0	39	0	0	0	0	0	0	0	0	0	0	42
OG0001486	1	1	1	2	3	3	2	2	2	2	6	3	1	4	1	1	2	2	1	1	0	1	42
OG0001487	1	2	6	1	4	0	1	2	1	4	3	2	1	2	2	2	3	2	0	0	2	1	42
OG0001488	1	3	1	2	1	3	1	2	2	2	2	2	1	2	0	3	1	1	1	7	3	1	42
OG0001489	1	2	1	2	2	3	0	3	1	1	2	4	1	2	1	2	1	2	2	7	1	1	42
OG0001490	1	1	5	1	2	6	1	2	2	1	5	3	1	1	1	2	1	2	1	1	1	1	42
OG0001491	2	1	2	3	5	2	3	2	1	2	1	2	2	4	2	1	1	1	1	2	1	1	42
OG0001492	3	1	1	1	5	0	5	2	3	1	2	3	1	4	1	1	2	1	1	1	2	1	42
OG0001493	0	1	3	2	4	3	3	2	2	2	1	2	1	3	2	1	1	1	5	2	0	1	42
OG0001494	0	1	11	1	11	0	7	0	0	0	4	0	1	0	0	6	0	0	0	0	0	0	42
OG0001495	0	1	1	1	5	2	5	4	1	1	1	3	2	3	2	1	1	1	1	2	3	1	42
OG0001496	0	2	2	3	2	0	1	0	1	1	2	0	3	4	0	4	3	8	0	2	4	0	42
OG0001497	0	3	1	2	3	1	4	2	4	1	2	2	1	2	1	1	2	1	1	4	2	2	42
OG0001498	0	0	42	0	0	0	0	0	0	0	0	0	0	0	0	0	0	0	0	0	0	0	42
OG0001499	0	0	7	5	10	0	1	0	3	0	11	0	0	0	0	0	5	0	0	0	0	0	42
OG0001500	0	0	2	0	36	0	4	0	0	0	0	0	0	0	0	0	0	0	0	0	0	0	42
OG0001501	0	0	0	42	0	0	0	0	0	0	0	0	0	0	0	0	0	0	0	0	0	0	42
OG0001502	0	0	0	0	0	42	0	0	0	0	0	0	0	0	0	0	0	0	0	0	0	0	42
OG0001503	0	0	0	0	0	1	0	0	0	41	0	0	0	0	0	0	0	0	0	0	0	0	42
OG0001504	0	0	0	0	0	0	0	0	1	0	5	0	0	26	1	0	2	7	0	0	0	0	42
OG0001505	0	0	0	0	0	0	0	0	0	0	0	0	0	42	0	0	0	0	0	0	0	0	42
OG0001506	0	0	0	0	0	0	0	0	0	0	0	0	0	0	0	42	0	0	0	0	0	0	42
OG0001507	1	2	2	2	3	1	1	2	2	2	2	2	2	4	2	2	2	2	1	2	1	1	41
OG0001508	1	5	2	1	3	0	2	0	1	1	19	0	2	0	1	3	0	0	0	0	0	0	41
OG0001509	5	2	6	0	3	1	0	2	0	2	0	3	2	5	0	4	0	3	1	0	2	0	41
OG0001510	16	0	0	0	0	0	0	0	0	0	0	0	0	13	2	2	0	8	0	0	0	0	41
OG0001511	3	1	1	1	5	1	1	3	1	1	2	4	1	2	5	1	1	2	0	2	2	1	41
OG0001512	2	1	2	1	5	3	3	3	2	1	2	3	1	2	2	1	1	1	1	2	1	1	41
OG0001513	2	3	1	1	6	1	3	1	5	1	2	3	2	1	0	1	0	2	1	4	1	0	41
OG0001514	1	1	2	1	1	1	1	1	1	1	1	1	1	2	1	1	2	11	1	2	6	1	41
OG0001515	1	2	2	2	4	1	1	2	1	3	3	2	1	3	2	2	2	1	2	2	1	1	41
OG0001516	3	4	1	1	1	1	1	1	3	3	2	1	3	6	2	1	1	1	2	0	2	1	41
OG0001517	2	0	7	2	2	4	1	1	2	3	1	3	1	2	0	1	1	2	1	3	2	0	41
OG0001518	8	7	2	0	6	1	3	0	1	1	0	0	2	2	1	3	0	0	2	0	1	1	41
OG0001519	1	3	2	2	3	1	3	1	2	2	3	3	1	2	2	1	1	2	1	1	3	1	41
OG0001520	1	1	2	3	3	3	1	2	2	1	2	4	1	3	2	1	1	1	1	5	0	1	41
OG0001521	2	1	1	1	5	1	2	2	2	1	1	2	1	4	1	1	1	1	2	6	1	2	41
OG0001522	1	2	3	2	2	1	1	1	4	2	1	2	2	4	3	2	3	1	1	1	1	1	41
OG0001523	1	1	2	2	0	0	0	4	3	3	3	1	4	2	2	2	2	1	3	0	1	4	41
OG0001524	5	1	8	0	2	0	2	0	7	0	3	0	0	5	2	2	0	3	0	0	1	0	41
OG0001525	3	1	2	2	0	0	0	0	4	2	2	0	2	2	3	1	6	2	1	2	5	1	41
OG0001526	1	2	1	1	1	2	1	1	1	3	1	2	4	3	2	2	1	1	1	5	4	1	41
OG0001527	1	2	2	1	5	2	2	2	1	2	1	3	2	4	4	1	1	1	1	1	1	1	41
OG0001528	1	1	0	1	5	2	0	1	3	1	1	3	2	2	1	1	1	1	3	6	3	2	41
OG0001529	2	2	3	1	4	0	1	1	1	2	1	0	3	3	4	2	3	6	0	2	0	0	41
OG0001530	1	1	1	1	6	1	3	3	2	1	1	3	1	3	2	1	1	1	1	5	1	1	41
OG0001531	3	0	0	0	0	0	1	0	0	0	0	0	0	1	0	0	0	0	10	0	0	26	41
OG0001532	9	0	0	0	0	0	0	0	2	0	0	0	0	15	0	7	0	7	0	0	1	0	41
OG0001533	1	1	3	1	1	2	1	3	2	2	2	2	2	2	4	2	1	3	1	2	2	1	41
OG0001534	2	3	1	1	0	0	1	3	3	1	3	3	2	2	4	1	2	2	4	0	2	1	41
OG0001535	3	3	1	1	2	2	2	1	4	2	2	2	1	4	2	1	1	1	1	3	1	1	41
OG0001536	1	1	2	1	1	1	2	1	3	2	2	1	2	2	2	5	3	1	1	4	2	1	41
OG0001537	1	1	1	1	3	1	4	3	3	1	1	3	1	3	1	1	2	2	2	3	2	1	41
OG0001538	2	2	1	1	6	2	3	3	1	1	2	3	1	1	1	1	1	2	2	3	1	1	41
OG0001539	2	2	1	1	2	1	2	3	3	1	1	3	1	3	0	1	1	3	1	7	1	1	41
OG0001540	1	1	1	1	7	1	4	2	1	2	1	2	1	3	2	1	1	2	1	4	1	1	41
OG0001541	1	1	1	1	8	1	1	2	2	1	1	2	1	2	1	1	2	2	1	6	2	1	41
OG0001542	1	2	2	1	1	9	3	1	3	1	1	2	1	1	2	1	1	1	1	3	1	2	41
OG0001543	2	2	2	0	2	1	1	2	1	6	4	2	3	1	0	1	2	4	1	2	1	1	41
OG0001544	2	2	2	2	2	2	0	2	2	0	2	2	3	3	1	2	2	2	2	2	1	3	41
OG0001545	1	1	1	1	6	1	3	6	1	1	1	4	1	1	1	1	1	0	1	5	2	1	41
OG0001546	2	3	1	1	1	4	1	1	1	3	2	1	2	1	4	1	3	3	1	3	1	1	41
OG0001547	1	1	1	1	2	0	2	3	1	4	1	2	1	2	2	1	2	2	1	6	2	3	41
OG0001548	1	4	2	1	2	1	2	2	4	1	2	2	1	2	2	1	1	3	1	2	3	1	41
OG0001549	1	5	4	0	1	0	0	0	5	2	0	0	1	2	3	0	1	4	2	5	2	3	41
OG0001550	2	1	3	2	2	1	1	2	1	1	1	4	1	4	1	1	1	3	4	2	1	2	41
OG0001551	2	2	1	2	1	1	2	2	2	2	2	2	3	3	3	2	2	3	1	1	1	1	41
OG0001552	1	3	1	2	2	1	2	3	4	2	2	4	1	3	1	1	1	1	1	3	1	1	41
OG0001553	1	4	1	1	8	5	1	3	1	2	1	4	1	1	0	1	1	1	0	2	1	1	41
OG0001554	2	2	1	2	3	1	2	2	3	1	2	3	1	4	1	1	1	2	1	3	2	1	41
OG0001555	1	1	1	2	2	1	3	2	3	2	3	2	1	2	1	1	2	3	1	5	1	1	41
OG0001556	1	1	6	1	0	0	0	0	12	4	2	0	1	2	2	2	1	1	0	4	1	0	41
OG0001557	1	1	3	1	2	1	7	2	1	1	1	2	1	3	3	1	1	1	1	5	1	1	41
OG0001558	1	1	2	1	0	13	1	1	1	1	1	1	5	2	1	1	1	1	2	1	2	1	41
OG0001559	1	1	1	2	6	1	3	1	1	1	3	2	1	2	1	1	1	2	1	6	1	2	41
OG0001560	1	1	1	1	4	7	0	1	2	1	5	1	1	1	2	1	1	4	0	0	1	5	41
OG0001561	1	1	1	1	5	1	3	3	1	3	2	2	2	3	1	3	3	1	1	0	1	2	41
OG0001562	1	5	3	2	0	2	1	2	1	3	2	1	1	6	2	2	2	1	1	0	1	2	41
OG0001563	1	1	2	1	1	1	2	2	2	2	1	1	1	5	3	1	2	2	2	4	1	3	41
OG0001564	1	2	2	2	1	2	1	3	1	2	2	2	1	5	2	1	2	1	3	2	2	1	41
OG0001565	4	4	1	0	3	2	2	3	1	2	2	3	2	2	1	1	1	1	1	1	2	2	41
OG0001566	1	2	2	0	10	0	3	1	1	1	4	2	2	2	1	1	1	2	2	2	1	0	41
OG0001567	1	1	1	1	5	1	3	4	1	2	1	3	1	1	1	1	1	4	1	5	1	1	41
OG0001568	2	2	2	1	2	2	1	2	1	2	2	3	2	3	1	2	2	2	3	2	1	1	41
OG0001569	1	1	1	1	3	2	1	2	2	1	1	2	1	4	4	1	1	2	1	8	0	1	41
OG0001570	2	1	1	1	3	6	3	4	1	1	2	4	1	1	1	1	1	2	2	1	1	1	41
OG0001571	1	4	2	1	1	1	2	1	1	1	2	1	2	8	2	1	3	3	1	2	0	1	41
OG0001572	2	0	2	1	2	2	3	1	2	2	2	1	1	5	2	1	1	1	1	2	5	2	41
OG0001573	2	1	1	1	2	1	1	4	2	1	1	3	1	2	2	1	1	2	1	9	1	1	41
OG0001574	1	4	1	1	0	1	2	1	3	2	1	1	3	2	3	1	1	1	1	4	6	1	41
OG0001575	3	1	1	2	4	1	2	2	1	1	2	2	2	2	3	1	2	2	1	3	2	1	41
OG0001576	0	8	0	0	0	0	0	0	3	3	0	0	10	6	0	3	1	7	0	0	0	0	41
OG0001577	0	4	2	3	2	2	1	3	1	2	3	3	2	2	1	3	2	1	1	1	1	1	41
OG0001578	0	1	0	0	0	0	0	0	12	2	0	0	3	6	7	1	0	0	0	0	9	0	41
OG0001579	0	0	38	0	0	0	0	0	0	0	0	0	0	0	1	2	0	0	0	0	0	0	41
OG0001580	0	0	41	0	0	0	0	0	0	0	0	0	0	0	0	0	0	0	0	0	0	0	41
OG0001581	0	0	1	0	40	0	0	0	0	0	0	0	0	0	0	0	0	0	0	0	0	0	41
OG0001582	0	0	1	0	0	0	0	0	0	4	3	0	0	6	0	1	0	25	0	0	1	0	41
OG0001583	0	0	0	0	0	40	0	0	0	0	0	0	0	0	0	0	1	0	0	0	0	0	41
OG0001584	0	0	0	0	0	40	0	0	0	0	0	0	0	0	0	0	0	1	0	0	0	0	41
OG0001585	0	0	0	0	0	0	0	0	0	0	0	41	0	0	0	0	0	0	0	0	0	0	41
OG0001586	0	0	0	0	0	0	0	0	0	0	0	0	0	0	0	0	0	1	0	1	39	0	41
OG0001587	0	0	0	0	0	0	0	0	0	0	0	0	0	0	0	0	0	0	41	0	0	0	41
OG0001588	0	0	0	0	0	0	0	0	0	0	0	0	0	0	0	0	0	0	41	0	0	0	41
OG0001589	0	0	0	0	0	0	0	0	0	0	0	0	0	0	0	0	0	0	0	41	0	0	41
OG0001590	12	0	1	1	1	2	1	1	2	1	1	2	1	5	2	1	1	2	0	2	1	0	40
OG0001591	14	2	0	1	2	1	0	1	4	1	0	2	2	2	0	4	1	1	0	2	0	0	40
OG0001592	40	0	0	0	0	0	0	0	0	0	0	0	0	0	0	0	0	0	0	0	0	0	40
OG0001593	40	0	0	0	0	0	0	0	0	0	0	0	0	0	0	0	0	0	0	0	0	0	40
OG0001594	1	1	2	1	5	0	2	1	1	3	2	1	3	3	1	2	2	3	1	3	1	1	40
OG0001595	1	1	1	2	3	1	3	4	2	2	1	3	2	3	1	1	2	1	1	2	2	1	40
OG0001596	1	3	3	0	1	3	1	1	2	2	1	1	0	1	3	2	2	1	0	4	2	6	40
OG0001597	8	0	1	1	2	1	0	2	2	1	3	2	1	1	1	3	1	3	1	0	5	1	40
OG0001598	2	3	1	1	1	3	2	2	3	1	1	2	1	3	2	1	1	1	1	4	3	1	40
OG0001599	2	1	3	2	1	1	2	1	2	2	3	1	2	5	1	1	1	2	1	3	2	1	40
OG0001600	5	1	0	2	6	0	3	1	1	0	1	1	1	0	0	1	0	1	5	5	0	6	40
OG0001601	5	3	2	2	2	1	2	1	2	2	2	0	1	2	1	2	2	1	1	3	1	2	40
OG0001602	5	0	1	1	1	0	0	1	3	0	0	1	0	1	6	4	4	4	1	0	7	0	40
OG0001603	3	1	4	1	0	0	0	1	6	2	2	1	4	2	1	3	1	1	1	2	3	1	40
OG0001604	1	1	1	1	3	0	5	6	1	1	2	9	1	1	0	1	0	1	3	1	0	1	40
OG0001605	2	4	2	1	0	0	5	1	0	0	0	1	0	2	0	19	0	1	2	0	0	0	40
OG0001606	7	1	2	0	3	1	2	2	1	1	4	2	1	2	1	1	1	3	0	1	3	1	40
OG0001607	1	2	2	4	1	1	5	3	1	3	2	3	2	0	1	1	1	1	2	2	1	1	40
OG0001608	2	2	1	1	1	1	1	2	2	2	1	3	2	3	2	1	2	1	1	4	2	3	40
OG0001609	1	2	3	2	1	1	1	2	2	2	1	2	2	7	1	2	1	1	2	1	2	1	40
OG0001610	1	1	3	1	1	0	1	6	3	2	2	3	1	9	0	1	1	1	1	1	0	1	40
OG0001611	2	1	2	2	4	2	3	2	2	2	2	2	2	1	2	1	2	2	1	1	1	1	40
OG0001612	1	1	1	1	2	0	1	1	4	4	4	2	1	2	3	2	2	4	0	1	3	0	40
OG0001613	1	1	2	1	3	1	2	2	6	1	1	3	1	4	5	1	1	1	0	2	1	0	40
OG0001614	2	2	2	1	4	2	1	1	3	2	2	1	2	4	1	3	2	2	1	1	1	0	40
OG0001615	1	1	2	1	2	2	2	1	2	2	3	1	1	4	3	1	2	3	1	1	3	1	40
OG0001616	2	2	1	1	4	1	3	3	1	1	1	3	1	1	2	1	1	1	1	5	3	1	40
OG0001617	2	3	2	1	1	0	1	0	3	2	4	0	2	2	2	2	4	2	2	1	2	2	40
OG0001618	1	1	3	1	2	1	2	1	2	2	1	1	1	2	3	1	1	1	6	3	3	1	40
OG0001619	2	1	1	1	3	3	1	1	2	1	4	1	1	5	2	1	1	2	1	1	4	1	40
OG0001620	1	3	3	2	2	3	2	2	2	1	1	2	2	3	1	2	1	1	1	2	1	2	40
OG0001621	2	1	3	1	4	1	1	2	3	1	4	2	1	3	2	3	1	2	2	0	0	1	40
OG0001622	5	1	5	0	0	0	0	0	5	2	0	1	5	1	1	3	5	2	0	0	4	0	40
OG0001623	1	1	1	1	1	5	1	1	1	0	2	1	2	2	5	1	1	1	1	1	8	2	40
OG0001624	10	12	0	0	0	0	0	1	7	0	0	2	4	0	0	1	2	0	0	0	0	1	40
OG0001625	1	1	1	1	1	1	1	17	2	1	1	1	1	1	1	1	2	2	1	0	1	1	40
OG0001626	1	1	1	1	7	2	4	1	1	1	1	1	1	1	2	1	2	1	2	4	3	1	40
OG0001627	1	1	1	2	5	1	4	2	2	2	4	2	2	2	2	1	1	1	1	1	1	1	40
OG0001628	4	1	2	2	0	0	0	3	4	1	0	3	1	3	1	5	3	0	3	0	3	1	40
OG0001629	1	1	1	1	1	1	1	1	4	1	2	1	3	5	4	1	1	1	2	2	4	1	40
OG0001630	1	1	1	2	5	2	6	4	2	1	1	2	1	1	1	1	1	1	1	3	1	1	40
OG0001631	1	1	1	2	8	1	3	3	2	1	1	3	1	2	1	1	1	1	1	4	1	0	40
OG0001632	1	1	1	1	3	3	3	1	1	1	1	2	1	3	1	5	1	1	1	6	1	1	40
OG0001633	2	2	1	1	2	1	1	2	2	3	1	1	2	4	1	2	2	3	2	2	2	1	40
OG0001634	1	2	1	1	1	1	1	1	3	1	1	1	1	2	2	1	2	3	2	8	2	2	40
OG0001635	1	2	1	2	3	1	3	3	2	1	2	3	1	2	2	2	2	2	1	2	1	1	40
OG0001636	1	1	3	2	2	1	1	1	3	1	3	1	1	5	2	2	3	1	1	2	1	2	40
OG0001637	2	1	2	1	0	0	2	2	3	2	2	1	4	4	0	2	3	2	2	1	2	2	40
OG0001638	2	0	3	0	1	0	0	0	1	3	1	0	0	22	3	0	0	2	1	0	1	0	40
OG0001639	1	1	0	1	2	2	1	1	1	1	1	1	2	6	1	1	3	2	1	6	4	1	40
OG0001640	1	1	4	3	4	5	1	1	1	1	2	1	1	2	1	5	1	1	1	0	2	1	40
OG0001641	3	1	1	1	1	1	0	1	5	1	2	1	1	3	5	2	4	1	1	1	3	1	40
OG0001642	1	1	1	0	3	0	2	5	1	1	1	8	1	3	1	1	2	3	1	0	1	3	40
OG0001643	2	2	4	1	3	0	1	0	1	0	8	0	3	7	0	1	2	0	0	5	0	0	40
OG0001644	3	1	5	1	1	4	0	2	1	1	2	0	1	5	6	1	1	3	1	0	1	0	40
OG0001645	2	1	3	2	1	2	1	4	1	2	2	3	1	2	3	1	1	2	2	2	1	1	40
OG0001646	1	1	1	2	2	2	1	3	2	2	1	2	1	4	3	1	2	2	1	4	1	1	40
OG0001647	4	13	0	0	5	0	0	0	5	0	3	0	1	0	0	1	4	1	0	1	2	0	40
OG0001648	2	4	2	0	2	0	2	3	4	2	2	3	2	2	0	2	2	2	1	0	1	2	40
OG0001649	1	3	2	2	2	2	2	2	2	1	2	2	1	3	1	1	1	2	1	3	3	1	40
OG0001650	1	1	1	1	6	2	3	2	1	1	1	2	1	2	1	1	1	1	1	8	1	1	40
OG0001651	1	1	1	1	2	2	1	1	3	1	3	1	1	5	1	1	1	1	3	4	4	1	40
OG0001652	1	1	1	1	1	1	1	1	9	1	1	1	4	2	2	1	1	2	2	4	1	1	40
OG0001653	1	1	1	1	4	3	4	2	1	1	2	2	1	1	1	1	1	1	1	8	1	1	40
OG0001654	1	3	2	0	4	1	4	2	2	2	2	2	2	2	1	1	1	2	1	3	1	1	40
OG0001655	1	3	2	2	3	2	1	2	2	2	2	1	2	3	1	3	2	1	1	2	1	1	40
OG0001656	1	1	2	2	2	0	2	1	2	3	5	0	1	1	4	1	6	1	1	1	2	1	40
OG0001657	1	3	2	1	1	2	3	2	2	1	1	2	1	4	1	1	1	3	1	5	1	1	40
OG0001658	1	1	1	1	7	1	4	3	3	1	1	3	1	2	1	1	1	1	2	0	2	2	40
OG0001659	1	0	0	0	0	0	0	0	0	1	2	0	0	0	0	34	0	1	1	0	0	0	40
OG0001660	1	3	3	1	4	1	4	3	1	1	1	4	1	1	1	1	1	1	1	2	3	1	40
OG0001661	1	1	1	1	7	1	4	3	1	1	1	2	1	1	1	1	1	1	1	8	0	1	40
OG0001662	0	40	0	0	0	0	0	0	0	0	0	0	0	0	0	0	0	0	0	0	0	0	40
OG0001663	0	2	2	1	1	1	1	1	3	2	2	1	2	4	2	2	2	1	2	5	2	1	40
OG0001664	0	1	0	0	0	0	0	0	6	1	10	0	0	8	7	0	0	7	0	0	0	0	40
OG0001665	0	1	1	1	2	5	1	1	6	1	2	1	2	1	1	1	1	1	1	7	2	1	40
OG0001666	0	1	1	1	4	1	3	4	1	1	1	4	1	4	2	1	1	1	0	5	2	1	40
OG0001667	0	1	2	1	2	1	1	7	1	1	1	4	1	3	6	1	1	2	1	1	1	1	40
OG0001668	0	1	1	2	1	1	2	2	1	1	2	2	2	7	3	1	1	2	1	5	1	1	40
OG0001669	0	3	4	0	0	1	0	0	6	0	15	0	0	8	0	0	3	0	0	0	0	0	40
OG0001670	0	0	40	0	0	0	0	0	0	0	0	0	0	0	0	0	0	0	0	0	0	0	40
OG0001671	0	0	33	0	0	0	1	0	0	0	1	2	0	0	0	0	0	0	0	3	0	0	40
OG0001672	0	0	39	0	0	0	0	0	1	0	0	0	0	0	0	0	0	0	0	0	0	0	40
OG0001673	0	0	40	0	0	0	0	0	0	0	0	0	0	0	0	0	0	0	0	0	0	0	40
OG0001674	0	0	2	2	13	0	5	0	4	1	2	0	1	5	0	1	1	0	0	3	0	0	40
OG0001675	0	0	0	1	0	0	0	0	0	0	0	0	0	0	0	39	0	0	0	0	0	0	40
OG0001676	0	0	0	0	40	0	0	0	0	0	0	0	0	0	0	0	0	0	0	0	0	0	40
OG0001677	0	0	0	0	0	0	40	0	0	0	0	0	0	0	0	0	0	0	0	0	0	0	40
OG0001678	0	0	0	0	0	0	0	22	0	1	0	17	0	0	0	0	0	0	0	0	0	0	40
OG0001679	0	0	0	0	0	0	0	0	1	0	0	0	0	0	0	38	0	0	0	0	1	0	40
OG0001680	0	0	0	0	0	0	0	0	0	0	39	0	0	0	0	0	0	0	0	0	1	0	40
OG0001681	0	0	0	0	0	0	0	0	0	0	0	0	0	0	0	0	0	0	0	40	0	0	40
OG0001682	2	2	2	1	3	1	3	3	2	1	1	3	1	2	4	1	1	1	1	1	1	2	39
OG0001683	39	0	0	0	0	0	0	0	0	0	0	0	0	0	0	0	0	0	0	0	0	0	39
OG0001684	2	2	2	2	3	1	1	1	2	2	1	1	5	3	1	2	2	3	1	1	1	0	39
OG0001685	12	0	0	0	2	0	0	0	2	1	0	1	8	1	4	0	0	5	0	0	3	0	39
OG0001686	1	1	2	2	1	1	1	1	2	1	9	1	1	2	3	1	1	0	1	4	2	1	39
OG0001687	1	3	1	2	2	2	1	2	1	1	1	2	1	1	1	1	1	1	1	10	2	1	39
OG0001688	2	1	2	1	2	2	2	3	1	1	1	3	1	5	2	2	1	1	1	1	2	2	39
OG0001689	2	2	2	2	2	2	1	2	2	1	2	2	1	2	2	2	2	2	2	1	2	1	39
OG0001690	7	5	0	0	16	0	0	0	1	0	0	0	6	0	3	0	0	1	0	0	0	0	39
OG0001691	2	2	2	1	4	3	0	1	2	1	2	3	1	3	1	1	3	1	1	2	2	1	39
OG0001692	3	1	1	1	2	1	1	2	1	1	1	3	1	5	4	1	1	2	2	3	1	1	39
OG0001693	3	2	1	2	1	1	1	2	1	0	1	2	2	1	0	1	1	1	2	0	1	13	39
OG0001694	1	2	1	2	4	1	2	1	2	2	2	2	2	2	1	2	1	1	1	2	2	3	39
OG0001695	2	4	1	0	2	0	1	2	2	3	1	2	3	3	3	4	1	2	0	0	2	1	39
OG0001696	2	2	2	2	1	1	1	3	2	1	2	2	1	3	3	1	1	3	1	1	1	3	39
OG0001697	2	1	1	1	5	1	2	6	3	2	1	2	1	2	1	1	2	1	1	1	1	1	39
OG0001698	1	3	1	1	2	2	2	1	2	2	1	1	3	2	1	1	1	1	1	7	2	1	39
OG0001699	1	1	2	2	2	1	2	2	2	1	1	2	1	2	2	2	1	1	4	4	2	1	39
OG0001700	2	2	2	2	2	0	1	4	1	2	1	4	2	2	2	2	1	2	2	1	1	1	39
OG0001701	3	2	3	0	2	0	1	0	5	2	6	0	2	6	0	1	1	0	2	0	0	3	39
OG0001702	1	3	1	2	5	1	3	3	1	1	1	2	2	2	1	1	3	1	0	2	2	1	39
OG0001703	2	3	1	2	5	2	2	2	2	2	2	2	2	1	1	1	1	2	2	1	0	1	39
OG0001704	4	0	1	0	1	0	2	2	6	1	0	3	4	1	9	2	1	1	0	0	1	0	39
OG0001705	1	1	1	2	11	3	6	1	1	1	2	0	1	1	1	1	1	1	1	0	0	2	39
OG0001706	1	1	7	2	5	1	1	2	3	0	1	2	1	1	0	1	1	1	1	4	2	1	39
OG0001707	1	4	1	0	3	2	2	3	2	1	1	2	1	4	3	0	2	1	1	2	2	1	39
OG0001708	1	2	2	2	4	1	2	1	3	2	1	1	2	3	5	2	2	1	0	2	0	0	39
OG0001709	1	2	1	1	3	1	3	2	1	2	1	3	1	2	3	1	2	2	3	2	1	1	39
OG0001710	1	1	1	1	4	3	1	3	2	1	1	2	1	1	1	1	1	1	1	10	0	1	39
OG0001711	1	1	1	1	1	1	1	1	2	1	1	1	1	3	2	1	2	1	1	12	3	0	39
OG0001712	2	3	1	3	3	3	2	2	1	1	1	3	1	1	2	2	1	1	1	3	1	1	39
OG0001713	1	1	2	1	2	1	4	4	1	2	1	4	1	3	2	1	1	2	1	2	1	1	39
OG0001714	1	1	1	1	8	1	4	3	1	1	1	4	1	1	3	1	1	1	1	1	1	1	39
OG0001715	3	2	2	2	1	1	2	2	2	2	1	3	1	3	2	2	1	2	1	2	1	1	39
OG0001716	1	1	1	1	1	1	0	4	3	2	3	4	2	4	1	1	1	1	3	1	2	1	39
OG0001717	4	2	1	1	1	0	1	5	1	1	2	5	2	3	1	1	3	1	1	0	1	2	39
OG0001718	1	1	1	1	2	1	1	1	2	1	1	1	2	1	11	2	1	1	1	4	0	2	39
OG0001719	1	1	1	3	5	2	2	3	3	1	1	3	1	2	1	1	1	2	1	3	0	1	39
OG0001720	1	1	1	1	7	1	2	3	1	1	1	3	1	2	1	1	2	1	1	4	2	1	39
OG0001721	2	3	3	1	1	1	1	2	3	2	1	2	2	2	2	1	2	2	1	2	2	1	39
OG0001722	1	1	1	1	6	1	5	4	1	1	1	3	0	1	1	1	1	1	1	4	1	2	39
OG0001723	1	1	2	0	1	1	1	1	1	1	1	1	1	5	1	1	1	1	14	2	0	1	39
OG0001724	1	3	2	1	3	1	1	3	1	1	1	3	1	3	2	1	1	1	1	7	0	1	39
OG0001725	1	2	1	0	3	1	1	2	2	2	3	2	2	2	0	1	1	2	2	7	1	1	39
OG0001726	1	1	1	1	3	3	3	4	1	1	1	4	1	2	3	1	1	1	1	2	1	2	39
OG0001727	3	0	0	0	1	1	0	1	2	0	0	0	0	23	1	0	3	2	0	0	0	2	39
OG0001728	3	1	1	0	2	2	0	3	2	0	2	3	2	3	0	2	2	5	2	0	2	2	39
OG0001729	1	1	2	1	1	6	1	1	2	2	1	2	2	2	1	1	3	1	1	2	3	2	39
OG0001730	1	1	1	2	3	3	3	2	2	1	1	2	1	2	2	1	1	1	1	4	2	2	39
OG0001731	1	1	1	1	1	4	1	1	2	2	2	1	6	4	1	1	3	1	1	1	2	1	39
OG0001732	1	1	1	1	1	1	2	1	3	2	1	1	2	1	3	2	5	1	1	1	6	1	39
OG0001733	1	2	0	2	4	0	1	1	2	2	2	1	1	4	2	1	4	1	2	3	1	2	39
OG0001734	1	1	9	1	3	2	1	2	2	1	1	3	1	2	2	1	1	1	1	1	1	1	39
OG0001735	1	2	1	2	1	0	0	2	4	1	2	1	1	2	5	3	3	2	1	0	4	1	39
OG0001736	1	1	0	1	3	3	1	1	1	1	1	2	1	1	1	1	1	1	2	14	0	1	39
OG0001737	1	2	2	1	3	2	3	3	1	2	1	3	1	2	2	1	1	1	1	4	1	1	39
OG0001738	1	0	7	1	0	1	2	3	2	1	1	1	2	2	2	3	1	4	2	1	0	2	39
OG0001739	2	1	2	1	1	1	1	1	4	2	2	1	2	3	2	2	1	2	1	5	1	1	39
OG0001740	1	2	2	1	2	2	1	1	2	2	1	1	2	4	2	2	2	3	0	2	4	0	39
OG0001741	2	1	6	1	3	2	3	1	1	1	1	1	1	5	2	1	1	1	3	0	1	1	39
OG0001742	3	1	2	1	3	1	1	2	3	1	2	2	1	2	1	1	2	1	1	4	3	1	39
OG0001743	1	1	1	1	5	1	2	2	3	1	2	2	1	3	1	1	1	2	2	2	2	2	39
OG0001744	1	2	1	1	6	1	5	3	3	0	1	3	1	0	1	1	1	1	1	2	2	2	39
OG0001745	2	1	1	1	6	1	2	5	1	1	1	5	1	1	0	1	1	1	1	4	1	1	39
OG0001746	1	1	1	1	2	1	1	4	1	1	1	4	1	1	1	1	1	2	2	10	1	0	39
OG0001747	2	1	1	1	1	0	1	1	2	2	1	2	2	1	3	2	4	2	6	1	1	2	39
OG0001748	1	3	1	2	2	3	2	1	2	1	1	0	2	1	2	1	3	2	3	0	5	1	39
OG0001749	1	1	1	1	2	2	3	2	2	1	2	2	1	1	3	2	1	1	1	5	2	2	39
OG0001750	2	1	1	1	4	1	1	3	2	1	2	1	1	2	1	1	3	1	2	4	3	1	39
OG0001751	1	10	1	0	1	1	2	2	2	1	1	2	2	2	2	3	1	1	1	1	2	0	39
OG0001752	2	1	1	1	2	2	2	3	2	1	1	3	1	2	1	1	1	2	1	6	2	1	39
OG0001753	1	1	1	1	5	1	3	4	1	1	1	4	1	1	1	1	1	1	1	6	1	1	39
OG0001754	1	1	2	2	6	1	3	3	1	1	2	2	1	1	1	2	1	1	2	3	1	1	39
OG0001755	3	4	4	0	2	0	0	3	4	2	0	3	3	2	0	4	2	2	0	0	1	0	39
OG0001756	2	2	2	0	0	5	1	2	1	1	2	1	1	2	0	1	1	6	3	0	4	2	39
OG0001757	7	1	2	1	1	3	2	2	2	1	1	2	1	3	1	1	1	2	1	2	1	1	39
OG0001758	0	7	3	3	2	0	0	0	3	1	13	0	5	0	0	1	1	0	0	0	0	0	39
OG0001759	0	1	0	0	0	0	0	0	0	2	0	0	0	36	0	0	0	0	0	0	0	0	39
OG0001760	0	1	1	1	4	1	2	5	0	2	1	6	1	2	2	1	1	1	1	4	1	1	39
OG0001761	0	1	1	1	3	1	1	1	1	2	1	1	1	2	1	1	1	1	1	15	1	1	39
OG0001762	0	4	3	2	2	0	1	0	2	2	2	0	2	11	1	2	2	0	0	2	0	1	39
OG0001763	0	0	4	4	3	3	0	0	8	0	9	0	0	0	0	6	2	0	0	0	0	0	39
OG0001764	0	0	14	0	13	0	1	0	0	1	6	0	2	0	0	1	0	0	0	0	1	0	39
OG0001765	0	0	0	0	39	0	0	0	0	0	0	0	0	0	0	0	0	0	0	0	0	0	39
OG0001766	0	0	0	0	3	0	36	0	0	0	0	0	0	0	0	0	0	0	0	0	0	0	39
OG0001767	0	0	0	0	0	0	39	0	0	0	0	0	0	0	0	0	0	0	0	0	0	0	39
OG0001768	0	0	0	0	0	0	0	0	0	0	39	0	0	0	0	0	0	0	0	0	0	0	39
OG0001769	0	0	0	0	0	0	0	0	0	0	0	0	0	0	0	0	0	0	0	1	0	38	39
OG0001770	1	2	1	1	1	0	2	2	3	4	2	2	2	2	1	2	3	2	1	1	1	2	38
OG0001771	1	1	2	0	3	0	2	1	4	2	2	1	2	2	0	1	3	5	1	1	2	2	38
OG0001772	1	1	1	1	2	1	3	4	3	1	1	4	1	2	1	1	1	1	1	5	1	1	38
OG0001773	1	8	1	0	2	0	1	1	1	1	2	1	6	2	1	1	2	1	1	1	3	1	38
OG0001774	3	1	3	2	7	0	4	1	2	1	2	1	1	2	1	1	1	0	0	2	2	1	38
OG0001775	4	2	1	0	2	0	2	0	1	4	1	0	2	8	0	5	1	3	1	0	0	1	38
OG0001776	38	0	0	0	0	0	0	0	0	0	0	0	0	0	0	0	0	0	0	0	0	0	38
OG0001777	1	1	1	0	0	0	1	2	2	1	3	2	2	3	1	1	2	1	1	10	2	1	38
OG0001778	1	2	2	1	1	1	1	1	2	1	2	1	1	5	6	1	1	1	1	1	4	1	38
OG0001779	1	3	0	1	1	3	0	1	2	2	1	1	3	2	1	1	1	1	10	0	2	1	38
OG0001780	3	2	1	0	8	0	3	1	1	3	1	3	1	2	1	2	1	1	0	2	1	1	38
OG0001781	19	0	0	0	0	0	0	0	0	1	0	0	12	2	2	2	0	0	0	0	0	0	38
OG0001782	1	1	1	2	0	3	0	1	1	1	1	1	1	2	14	0	1	1	4	0	1	1	38
OG0001783	1	1	1	1	4	2	3	5	1	2	1	3	1	1	1	1	2	1	1	2	2	1	38
OG0001784	3	1	2	1	2	0	1	2	2	1	3	2	2	1	0	1	0	6	1	0	7	0	38
OG0001785	3	0	2	1	1	3	0	2	3	1	1	2	1	3	2	4	3	3	1	0	1	1	38
OG0001786	2	1	2	1	1	4	0	1	4	2	2	1	3	2	1	2	3	3	1	1	1	0	38
OG0001787	1	1	1	1	1	1	3	1	3	1	3	0	1	3	0	1	2	4	2	5	3	0	38
OG0001788	4	3	3	3	5	2	2	0	0	2	3	0	3	1	0	3	0	1	1	0	0	2	38
OG0001789	2	0	1	0	14	0	6	0	2	3	1	1	0	0	0	2	0	0	0	6	0	0	38
OG0001790	4	0	32	0	0	0	0	0	0	0	0	0	0	1	0	0	0	0	0	0	0	1	38
OG0001791	1	3	1	1	4	2	1	2	1	1	2	3	2	1	3	1	1	2	1	3	1	1	38
OG0001792	1	1	1	2	1	1	1	2	1	1	2	2	1	4	0	1	1	2	1	9	2	1	38
OG0001793	2	0	1	0	9	1	4	3	1	1	1	3	1	2	2	0	1	2	2	0	0	2	38
OG0001794	2	3	1	1	2	0	1	1	2	5	1	2	1	2	1	3	3	0	1	1	1	4	38
OG0001795	1	1	1	2	5	1	3	4	1	1	1	3	1	2	1	1	1	1	2	2	2	1	38
OG0001796	1	5	1	1	1	1	1	1	1	2	4	1	3	3	0	1	1	2	1	2	3	2	38
OG0001797	8	2	2	2	1	0	0	1	6	2	1	2	3	1	0	1	1	2	0	0	3	0	38
OG0001798	1	1	1	1	5	1	4	4	1	1	1	4	1	2	1	1	1	1	1	3	1	1	38
OG0001799	1	1	1	1	2	3	3	3	3	1	3	3	1	2	1	1	2	2	0	1	2	1	38
OG0001800	1	1	1	1	2	1	6	1	1	3	4	1	1	1	1	1	2	1	4	2	1	1	38
OG0001801	1	1	1	2	5	1	4	4	1	1	1	3	1	1	2	1	1	1	1	4	0	1	38
OG0001802	1	3	1	1	2	4	2	2	2	1	1	2	1	3	3	1	0	1	1	3	1	2	38
OG0001803	1	1	2	2	4	0	4	1	4	6	3	1	1	1	0	3	1	1	0	1	1	0	38
OG0001804	1	2	1	1	4	2	2	1	2	2	2	2	1	2	5	1	1	1	1	2	1	1	38
OG0001805	1	3	3	2	3	2	1	3	1	3	2	3	1	2	1	1	1	1	1	0	2	1	38
OG0001806	1	1	2	1	4	1	3	3	3	2	1	2	2	2	1	1	1	1	2	2	0	2	38
OG0001807	2	2	4	0	3	0	1	2	1	1	0	3	2	4	0	1	2	1	0	7	2	0	38
OG0001808	2	2	2	2	2	1	2	2	3	2	2	2	1	3	1	2	1	1	1	1	1	2	38
OG0001809	1	2	1	1	4	1	3	1	1	2	1	1	2	2	3	1	1	3	0	5	2	0	38
OG0001810	2	1	4	4	2	1	0	1	3	2	1	1	1	4	3	2	1	1	0	1	1	2	38
OG0001811	1	1	2	2	1	1	2	2	3	1	3	2	2	2	1	1	2	1	1	1	1	5	38
OG0001812	2	1	1	2	7	1	5	2	4	2	1	2	1	0	0	1	1	1	1	0	1	2	38
OG0001813	1	3	2	0	11	0	0	0	2	0	3	0	1	5	1	1	3	1	1	0	0	3	38
OG0001814	1	1	1	1	6	2	2	3	1	1	1	3	1	2	2	1	2	1	1	1	2	2	38
OG0001815	2	1	2	1	6	1	5	2	1	2	1	2	1	1	1	1	2	1	1	2	1	1	38
OG0001816	1	3	1	1	1	1	2	1	1	4	2	1	2	1	1	1	2	1	1	1	8	1	38
OG0001817	1	2	3	1	5	1	1	2	2	3	2	2	2	1	1	1	2	2	1	1	1	1	38
OG0001818	1	1	2	1	5	3	3	2	1	1	1	2	1	2	1	1	1	2	1	4	1	1	38
OG0001819	1	1	1	1	6	1	4	3	1	2	1	3	1	3	1	1	1	1	1	1	1	2	38
OG0001820	1	1	1	0	4	1	7	3	1	2	2	3	1	2	2	1	1	1	1	1	1	1	38
OG0001821	2	1	1	2	2	2	2	3	1	2	2	3	1	2	1	1	1	4	1	3	1	0	38
OG0001822	1	0	1	0	34	0	2	0	0	0	0	0	0	0	0	0	0	0	0	0	0	0	38
OG0001823	1	0	0	0	14	2	1	0	0	0	0	0	0	5	0	2	0	0	6	0	3	4	38
OG0001824	2	1	4	1	2	1	2	1	2	1	1	2	1	0	11	1	1	1	1	0	1	1	38
OG0001825	1	3	2	1	1	3	1	1	6	0	2	1	1	2	2	1	1	0	1	4	2	2	38
OG0001826	1	1	2	1	2	1	3	1	3	2	2	1	1	3	2	1	1	1	2	4	1	2	38
OG0001827	1	2	1	1	3	2	3	2	4	1	1	1	2	2	2	1	1	1	2	4	0	1	38
OG0001828	1	2	1	1	1	3	1	1	2	1	1	2	3	3	2	1	1	2	1	2	5	1	38
OG0001829	1	1	1	1	6	1	2	3	1	1	1	3	1	2	1	1	1	1	1	2	2	4	38
OG0001830	1	1	1	1	6	1	2	3	1	1	1	3	1	1	1	1	1	1	1	7	1	1	38
OG0001831	1	2	1	1	0	2	0	2	2	2	2	1	2	4	1	2	2	3	2	3	1	2	38
OG0001832	1	2	2	2	6	1	3	3	2	1	1	3	1	2	1	1	1	1	1	1	1	1	38
OG0001833	1	1	1	1	5	2	4	4	1	1	1	4	1	1	1	1	1	1	1	3	1	1	38
OG0001834	1	1	2	1	1	2	2	4	1	2	1	4	2	2	3	1	1	1	1	1	3	1	38
OG0001835	1	1	1	1	8	1	3	2	1	1	3	2	1	2	2	1	2	1	1	1	1	1	38
OG0001836	1	1	1	1	5	2	3	3	1	2	1	3	1	3	1	1	1	1	1	3	1	1	38
OG0001837	1	1	1	1	2	1	2	3	1	1	4	3	2	2	0	1	1	2	1	5	2	1	38
OG0001838	2	1	1	2	4	2	4	3	1	1	2	3	1	1	1	1	1	1	0	4	1	1	38
OG0001839	0	6	0	0	1	0	0	0	3	5	0	0	3	11	0	2	7	0	0	0	0	0	38
OG0001840	0	23	0	0	0	0	0	0	0	0	0	0	15	0	0	0	0	0	0	0	0	0	38
OG0001841	0	2	0	1	4	3	1	1	3	0	1	1	1	2	2	1	1	1	5	1	6	1	38
OG0001842	0	1	2	1	0	0	0	0	1	0	0	0	1	1	0	0	1	27	1	0	2	0	38
OG0001843	0	3	0	0	0	0	0	0	0	0	0	0	0	35	0	0	0	0	0	0	0	0	38
OG0001844	0	1	1	2	4	1	5	2	3	1	1	2	1	2	2	1	1	1	1	3	2	1	38
OG0001845	0	1	6	0	6	0	4	0	9	1	0	0	1	3	0	4	3	0	0	0	0	0	38
OG0001846	0	0	14	0	1	0	0	0	0	0	0	0	0	23	0	0	0	0	0	0	0	0	38
OG0001847	0	0	38	0	0	0	0	0	0	0	0	0	0	0	0	0	0	0	0	0	0	0	38
OG0001848	0	0	4	0	0	0	0	0	4	3	4	0	0	8	3	2	3	2	4	0	1	0	38
OG0001849	0	0	0	0	0	0	0	0	0	0	0	0	38	0	0	0	0	0	0	0	0	0	38
OG0001850	0	0	0	0	0	0	0	0	0	0	0	0	0	38	0	0	0	0	0	0	0	0	38
OG0001851	0	0	0	0	0	0	0	0	0	0	0	0	0	38	0	0	0	0	0	0	0	0	38
OG0001852	0	0	0	0	0	0	0	0	0	0	0	0	0	0	0	38	0	0	0	0	0	0	38
OG0001853	0	0	0	0	0	0	0	0	0	0	0	0	0	0	0	0	0	0	0	38	0	0	38
OG0001854	1	1	1	3	6	2	4	3	2	1	1	3	1	2	1	1	1	1	1	0	0	1	37
OG0001855	2	2	2	1	2	1	0	2	3	2	2	2	2	2	2	2	2	2	2	0	1	1	37
OG0001856	20	0	0	0	0	0	0	0	0	0	0	0	0	0	0	0	0	9	0	0	8	0	37
OG0001857	2	0	1	0	3	1	2	5	2	1	1	4	1	2	1	1	2	3	1	0	1	3	37
OG0001858	6	1	2	1	7	0	1	3	1	1	1	3	1	1	1	1	1	1	2	0	1	1	37
OG0001859	1	2	1	0	3	1	3	2	1	1	1	2	1	3	2	2	1	1	3	1	4	1	37
OG0001860	2	1	2	2	1	2	0	0	2	1	1	0	2	4	6	2	4	2	0	1	2	0	37
OG0001861	3	3	2	0	1	0	0	0	0	2	2	0	1	2	11	4	1	4	0	0	1	0	37
OG0001862	1	1	1	1	6	1	4	1	1	1	1	2	1	4	2	1	2	1	1	2	1	1	37
OG0001863	1	2	1	1	2	1	1	3	2	1	1	3	2	2	4	1	1	1	1	3	2	1	37
OG0001864	37	0	0	0	0	0	0	0	0	0	0	0	0	0	0	0	0	0	0	0	0	0	37
OG0001865	1	1	0	1	3	2	1	2	2	1	0	2	2	1	2	1	1	2	1	9	1	1	37
OG0001866	1	2	1	1	4	1	2	3	1	1	1	3	1	1	1	1	1	1	1	6	2	1	37
OG0001867	2	2	2	2	2	1	1	1	4	2	1	1	3	2	1	2	1	2	1	1	2	1	37
OG0001868	1	1	1	1	5	1	3	4	1	1	1	4	1	1	2	2	1	1	1	2	1	1	37
OG0001869	2	1	3	0	0	1	1	0	0	7	6	1	0	0	7	2	1	3	0	1	1	0	37
OG0001870	1	1	2	1	2	1	3	2	4	1	1	2	1	3	2	1	1	1	1	4	0	2	37
OG0001871	2	2	1	1	2	1	1	1	2	2	2	1	1	5	3	2	1	2	1	1	2	1	37
OG0001872	4	0	2	1	2	2	1	3	2	2	1	2	2	1	1	2	1	1	1	4	1	1	37
OG0001873	1	1	1	1	4	0	2	2	1	1	1	2	1	2	1	1	1	1	1	2	2	8	37
OG0001874	6	4	4	2	1	0	0	0	0	1	0	0	10	1	0	6	2	0	0	0	0	0	37
OG0001875	37	0	0	0	0	0	0	0	0	0	0	0	0	0	0	0	0	0	0	0	0	0	37
OG0001876	1	1	1	1	2	1	2	3	2	1	2	4	1	4	3	1	1	1	1	2	1	1	37
OG0001877	1	2	2	2	2	0	1	3	2	2	1	2	1	2	1	7	1	1	1	1	1	1	37
OG0001878	3	1	3	0	2	1	3	1	1	3	1	2	1	3	4	1	1	2	1	1	1	1	37
OG0001879	1	1	1	1	5	1	4	4	1	1	1	3	1	2	2	1	1	1	0	3	1	1	37
OG0001880	1	5	1	1	3	1	1	1	2	5	1	1	1	2	0	1	1	2	1	1	2	3	37
OG0001881	4	3	2	1	1	0	1	2	1	4	1	3	7	2	0	1	2	1	0	0	1	0	37
OG0001882	3	2	1	0	6	0	1	2	1	2	1	2	2	2	2	1	1	1	2	3	1	1	37
OG0001883	9	2	0	0	0	0	0	0	6	3	0	0	3	4	1	3	1	0	5	0	0	0	37
OG0001884	1	1	3	0	2	1	2	4	2	2	3	4	1	2	2	2	1	1	1	0	1	1	37
OG0001885	1	1	1	2	2	1	1	3	2	1	3	3	1	3	1	1	1	1	3	2	1	2	37
OG0001886	1	1	1	1	1	2	1	1	2	1	5	1	1	4	1	1	1	2	1	1	6	1	37
OG0001887	1	1	1	2	5	1	2	3	2	1	1	3	2	1	1	3	2	1	0	2	1	1	37
OG0001888	2	4	1	1	1	0	1	1	2	2	1	1	3	2	3	1	2	3	1	2	3	0	37
OG0001889	4	0	2	0	5	0	3	3	1	0	2	4	0	1	0	2	1	6	1	1	1	0	37
OG0001890	1	1	2	1	1	2	1	3	5	1	1	3	1	1	1	1	1	1	3	1	3	2	37
OG0001891	1	1	1	1	3	1	2	3	3	2	2	3	1	3	1	1	1	1	1	2	2	1	37
OG0001892	2	1	1	2	2	1	2	4	2	2	1	5	1	2	0	1	1	2	2	2	0	1	37
OG0001893	1	1	2	0	1	5	2	1	4	2	1	1	2	2	1	1	1	2	3	2	1	1	37
OG0001894	3	1	3	1	1	2	0	3	3	1	2	3	1	3	1	1	1	1	1	3	1	1	37
OG0001895	3	2	1	1	2	1	2	1	2	1	1	1	4	4	2	1	1	1	1	1	2	2	37
OG0001896	2	2	2	2	0	0	0	5	2	2	2	5	2	3	0	2	1	2	0	1	2	0	37
OG0001897	2	0	1	1	1	2	1	3	2	2	1	4	1	1	1	2	1	1	3	2	2	3	37
OG0001898	2	1	2	1	2	0	1	2	4	2	3	3	2	1	0	2	1	1	3	0	0	4	37
OG0001899	1	1	1	1	4	1	3	3	1	1	1	2	1	3	1	1	2	1	1	3	1	3	37
OG0001900	1	1	1	1	3	6	4	2	2	1	1	2	1	2	2	1	1	1	1	1	1	1	37
OG0001901	2	1	1	1	3	1	1	1	3	1	2	2	1	3	2	1	1	1	1	4	2	2	37
OG0001902	4	1	0	1	1	3	0	0	1	1	1	0	2	1	1	1	1	2	1	2	13	0	37
OG0001903	1	5	1	1	2	1	0	0	2	2	4	1	1	3	4	1	2	1	0	1	4	0	37
OG0001904	1	2	3	1	3	0	4	0	4	2	3	0	2	4	0	3	2	0	1	1	1	0	37
OG0001905	2	1	1	1	3	2	2	2	2	2	2	2	1	3	2	1	3	1	1	1	1	1	37
OG0001906	1	2	3	1	1	2	1	1	3	1	3	1	1	3	3	2	1	1	2	2	1	1	37
OG0001907	1	2	1	1	7	1	4	2	1	0	2	2	1	2	0	1	1	1	1	3	1	2	37
OG0001908	1	1	1	1	3	1	1	2	1	1	1	4	2	3	1	3	1	1	1	4	1	2	37
OG0001909	1	2	2	2	1	1	0	2	3	2	2	2	2	3	2	2	1	1	0	5	1	0	37
OG0001910	2	1	2	1	0	2	1	2	1	2	1	1	1	6	1	1	2	4	2	2	1	1	37
OG0001911	4	2	1	1	2	1	1	0	3	2	2	0	1	3	4	1	2	1	1	1	3	1	37
OG0001912	2	4	6	1	0	0	0	0	2	3	4	0	8	2	1	3	1	0	0	0	0	0	37
OG0001913	1	2	1	0	0	1	0	0	7	1	4	1	4	5	1	2	4	1	1	1	0	0	37
OG0001914	1	1	1	1	3	4	2	2	2	1	1	2	4	2	4	0	1	1	1	2	0	1	37
OG0001915	1	1	1	1	4	4	1	3	2	1	1	4	1	1	2	1	1	1	1	3	1	1	37
OG0001916	1	1	1	1	6	1	3	3	1	1	1	2	1	1	1	1	1	1	1	5	1	2	37
OG0001917	1	2	1	1	1	2	1	2	2	1	1	2	1	2	0	1	2	1	1	9	2	1	37
OG0001918	1	1	1	1	5	0	6	3	2	1	1	3	1	2	2	1	0	1	1	3	0	1	37
OG0001919	1	1	1	1	4	0	4	3	1	1	1	4	2	3	1	2	1	1	1	1	2	1	37
OG0001920	1	1	1	1	5	1	2	4	2	1	1	3	1	2	2	1	1	1	3	1	1	1	37
OG0001921	1	1	1	1	6	1	4	4	1	1	1	3	1	2	1	1	1	1	1	2	1	1	37
OG0001922	1	1	1	1	6	1	4	2	1	1	2	2	1	2	1	1	1	1	1	4	1	1	37
OG0001923	1	2	3	1	1	1	2	1	1	1	2	1	1	1	4	4	1	3	2	1	2	1	37
OG0001924	1	0	2	0	2	1	2	6	2	1	3	3	1	1	1	1	1	1	0	6	1	1	37
OG0001925	1	2	8	1	1	3	1	1	1	2	1	1	1	2	2	1	1	1	2	2	1	1	37
OG0001926	1	2	2	1	2	0	2	1	1	2	2	2	2	2	2	2	0	2	2	6	1	0	37
OG0001927	1	5	2	1	1	1	1	1	2	1	2	1	1	4	2	1	3	1	1	1	3	1	37
OG0001928	2	1	1	3	3	1	2	2	2	1	1	2	2	2	1	1	2	1	1	4	1	1	37
OG0001929	2	2	2	1	1	1	0	1	7	1	1	1	1	3	3	1	1	2	0	1	5	0	37
OG0001930	3	2	2	2	2	0	0	3	1	1	1	3	1	2	3	3	2	3	2	0	1	0	37
OG0001931	1	1	2	1	1	2	3	1	2	1	2	1	3	2	5	1	2	1	1	1	2	1	37
OG0001932	1	1	3	1	5	0	1	3	3	1	3	4	1	6	0	2	1	0	1	0	0	0	37
OG0001933	1	2	2	2	2	1	1	1	3	2	1	1	1	3	2	1	1	1	2	3	3	1	37
OG0001934	1	1	1	1	1	1	3	1	3	2	8	1	1	4	1	1	2	1	0	2	1	0	37
OG0001935	1	2	2	2	3	2	1	2	2	1	1	1	1	1	1	3	1	1	1	7	1	0	37
OG0001936	1	2	2	1	3	0	2	5	2	1	1	4	1	2	1	1	1	2	1	2	1	1	37
OG0001937	2	1	0	2	1	2	1	1	3	1	1	1	2	3	1	2	2	4	0	4	2	1	37
OG0001938	2	1	2	1	5	1	5	3	2	1	1	3	1	1	1	1	1	1	1	1	1	1	37
OG0001939	1	6	1	1	3	1	2	3	2	1	1	4	1	2	1	1	1	1	1	1	1	1	37
OG0001940	1	0	1	0	1	2	4	1	1	1	1	1	1	1	5	2	1	1	1	2	8	1	37
OG0001941	1	2	1	1	1	1	1	1	2	1	2	1	1	3	1	1	1	2	1	8	3	1	37
OG0001942	2	1	1	1	2	1	1	1	2	1	1	2	2	4	1	1	1	2	1	3	5	1	37
OG0001943	1	3	10	0	0	0	0	0	3	1	3	0	0	6	5	0	2	3	0	0	0	0	37
OG0001944	1	1	2	1	2	1	6	2	1	2	2	2	2	2	0	2	1	1	2	2	1	1	37
OG0001945	4	1	3	1	3	1	0	0	4	1	2	1	2	2	3	1	2	1	1	1	1	2	37
OG0001946	2	1	1	1	3	3	3	4	1	1	1	4	1	1	1	1	1	1	1	3	1	1	37
OG0001947	1	0	1	2	5	0	1	2	3	1	1	2	1	3	3	1	1	2	2	1	3	1	37
OG0001948	3	1	1	1	1	6	3	2	2	1	1	2	1	1	1	1	1	1	1	5	1	0	37
OG0001949	0	20	0	0	0	0	0	0	2	0	0	0	15	0	0	0	0	0	0	0	0	0	37
OG0001950	0	3	5	3	2	0	0	0	4	0	3	0	2	2	1	5	2	0	1	3	0	1	37
OG0001951	0	5	10	0	7	0	0	0	3	0	8	0	0	0	0	1	0	0	0	0	3	0	37
OG0001952	0	1	1	1	5	1	4	4	1	1	1	4	1	1	0	1	1	2	2	3	0	2	37
OG0001953	0	1	8	1	1	4	2	0	0	1	1	0	1	2	4	1	2	6	0	0	0	2	37
OG0001954	0	1	3	0	1	0	1	0	5	0	1	2	3	5	6	1	3	2	1	0	1	1	37
OG0001955	0	0	10	4	8	1	3	0	0	1	6	0	0	0	0	4	0	0	0	0	0	0	37
OG0001956	0	0	12	0	0	0	2	0	0	4	2	0	0	0	8	0	0	1	0	0	8	0	37
OG0001957	0	0	37	0	0	0	0	0	0	0	0	0	0	0	0	0	0	0	0	0	0	0	37
OG0001958	0	0	5	0	1	0	0	0	0	0	22	0	0	0	0	0	0	0	0	9	0	0	37
OG0001959	0	0	2	1	12	0	5	0	1	0	5	0	0	1	0	2	1	0	0	7	0	0	37
OG0001960	0	0	0	1	35	0	0	0	0	0	0	0	0	0	0	0	0	0	0	0	1	0	37
OG0001961	0	0	0	0	1	0	0	0	0	5	0	0	4	21	0	0	0	1	1	0	0	4	37
OG0001962	0	0	0	0	0	0	0	0	2	0	0	0	1	30	0	1	2	0	0	0	1	0	37
OG0001963	0	0	0	0	0	0	0	0	0	0	0	0	0	0	0	37	0	0	0	0	0	0	37
OG0001964	0	0	0	0	0	0	0	0	0	0	0	0	0	0	0	37	0	0	0	0	0	0	37
OG0001965	0	0	0	0	0	0	0	0	0	0	0	0	0	0	0	0	0	0	37	0	0	0	37
OG0001966	1	1	1	1	2	0	3	2	5	1	1	2	2	2	1	1	1	3	1	1	3	1	36
OG0001967	1	1	1	1	3	1	4	3	1	1	1	3	0	2	1	1	1	1	1	5	1	2	36
OG0001968	2	1	1	1	3	1	1	1	3	2	1	2	1	2	2	1	1	6	1	2	0	1	36
OG0001969	1	1	1	1	2	2	2	4	1	1	0	4	0	2	2	1	1	1	1	6	1	1	36
OG0001970	4	1	2	1	2	1	1	2	2	2	2	2	2	4	1	2	1	2	1	0	1	0	36
OG0001971	1	1	1	0	2	0	0	2	9	2	1	1	6	2	1	1	1	1	0	1	3	0	36
OG0001972	1	1	1	1	2	2	2	1	2	2	1	1	1	7	1	1	3	1	2	1	1	1	36
OG0001973	1	0	1	1	4	2	2	1	2	1	2	1	1	2	1	1	2	1	1	8	0	1	36
OG0001974	6	1	1	2	1	4	2	0	1	1	1	1	0	2	1	1	1	2	3	0	3	2	36
OG0001975	34	0	0	0	0	0	0	0	0	0	0	0	0	0	0	1	0	1	0	0	0	0	36
OG0001976	1	1	1	1	1	1	2	2	4	1	1	3	1	5	1	1	2	1	1	3	1	1	36
OG0001977	1	1	2	1	3	2	1	1	1	1	1	2	1	2	4	2	1	1	1	3	2	2	36
OG0001978	1	2	1	2	2	1	4	2	2	1	1	1	2	1	1	1	2	1	4	2	1	1	36
OG0001979	2	2	2	1	3	0	0	0	4	2	0	0	6	2	1	2	1	6	0	0	2	0	36
OG0001980	2	1	1	1	3	3	0	1	2	2	2	1	2	3	1	2	2	2	0	2	1	2	36
OG0001981	3	1	4	1	3	0	2	0	5	1	1	1	3	4	1	1	1	3	0	0	1	0	36
OG0001982	1	3	1	1	1	0	3	2	2	2	2	3	3	2	0	1	1	3	1	0	3	1	36
OG0001983	2	1	1	1	4	1	3	1	1	1	2	1	1	2	4	1	2	2	1	1	2	1	36
OG0001984	1	2	1	1	3	2	2	2	1	1	1	3	1	1	2	1	1	1	1	6	1	1	36
OG0001985	6	4	1	1	0	0	0	0	3	1	0	0	3	5	4	3	2	1	1	0	1	0	36
OG0001986	1	1	2	1	1	2	1	2	3	2	1	2	3	3	3	2	1	2	0	1	1	1	36
OG0001987	2	4	1	1	4	0	2	1	2	3	2	0	4	2	0	2	1	1	1	1	1	1	36
OG0001988	1	2	1	0	3	2	1	2	3	1	1	2	1	2	1	1	1	3	1	4	2	1	36
OG0001989	1	3	1	1	1	0	1	0	3	1	1	1	4	4	1	1	3	3	0	2	1	3	36
OG0001990	2	1	1	1	0	0	0	0	6	1	2	0	2	4	4	1	6	2	0	0	3	0	36
OG0001991	4	1	1	1	1	2	5	2	1	1	1	2	3	3	1	1	2	1	1	1	1	0	36
OG0001992	3	1	2	1	2	2	2	3	3	1	1	1	1	2	3	1	1	1	1	1	1	2	36
OG0001993	1	1	1	2	4	2	2	2	1	2	2	2	1	2	1	1	1	1	4	0	2	1	36
OG0001994	1	1	2	1	5	1	3	2	1	1	1	2	1	2	2	1	1	1	1	4	1	1	36
OG0001995	1	2	3	1	2	1	3	1	1	1	1	1	1	4	2	1	1	1	1	2	4	1	36
OG0001996	3	1	0	0	0	0	0	0	3	12	0	0	0	8	5	0	3	1	0	0	0	0	36
OG0001997	1	1	1	1	5	2	2	2	2	1	1	2	2	2	1	1	1	1	1	3	2	1	36
[truncated: 45,687 more rows]

## Sheet: Table4
Orthogroup	Number of genes	Number of species	Origin	Number of losses	Taxa with loss	Taxa with gains
OG0000000	1869	22	Metazoa	0		Blan,Hsap,Lgig,Ofus,Skow,Tcas
OG0000001	1048	15	Metazoa	7	Hmia,Vertebrata,Ofus,Dgyr,Clitellata	Lana,Ngen,Paus,Smar,Smed,Spur
OG0000002	988	20	Metazoa	2	Hsap,Dgyr	Eand,Lana,Myes,Ngen,Paus,Spur
OG0000003	976	22	Metazoa	0		Blan,Cgig,Ctel,Hrob,Lluy,Nvec,Ofus
OG0000004	943	20	Metazoa	2	Ofus,Dgyr	Blan,Eand,Hmia,Lana,Ngen,Smed,Spur,Tcas
OG0000005	894	21	Metazoa	1	Hmia	Cgig,Myes,Skow,Spur
OG0000006	854	17	Metazoa	5	Hsap,Smar,Smed,Ofus,Dgyr	Blan,Ctel,Hrob,Ngen,Nvec,Spur,Tcas
OG0000007	818	22	Metazoa	0		Blan,Ctel,Lluy,Nvec,Ofus,Spur
OG0000008	807	22	Metazoa	0		Hrob
OG0000009	764	22	Metazoa	0		Blan,Spur
OG0000010	666	21	Metazoa	1	Tcas
OG0000011	650	21	Metazoa	1	Dgyr	Blan
OG0000012	565	22	Metazoa	0		Nvec
OG0000013	554	22	Metazoa	0		Ctel,Locu,Myes,Nvec,Spur
OG0000014	544	22	Metazoa	0
OG0000015	543	6	Bilateria	15	Spur,Vertebrata,Ecdysozoa,Lgig,A,Lana	Cgig
OG0000016	531	22	Metazoa	0		Blan,Ctel,Nvec
OG0000017	516	22	Metazoa	0
OG0000018	493	21	Metazoa	1	Smar	Blan,Lgig,Nvec,Ofus
OG0000019	478	22	Metazoa	0		Cgig,Nvec,Ofus
OG0000020	447	2	Metazoa	20	Hmia,Deuterostomia,Ecdysozoa,Bivalvia,E	Lgig
OG0000021	446	22	Metazoa	0
OG0000022	408	7	Nephrozoa	13	Spur,Chordata,Ecdysozoa,Mollusca,Vermizoa,Lophophorata	Ctel,Dgyr,Eand,Hrob,Lluy
OG0000023	404	16	Metazoa	6	Hsap,Tcas,Cgig,Smed,Ofus,Dgyr	Blan,Locu,Spur
OG0000024	380	20	Metazoa	2	Cgig,Smed	Blan,Ofus,Spur
OG0000025	371	22	Metazoa	0
OG0000026	370	22	Metazoa	0
OG0000027	368	20	Metazoa	2	Hmia,Tcas	Nvec,Ofus,Spur
OG0000028	354	22	Metazoa	0
OG0000029	352	3	Metazoa	19	Hmia,Ambulacraria,Blan,Protostomia	Hsap
OG0000030	351	14	Metazoa	8	Hmia,Vertebrata,Tcas,Smed,Dgyr,Clitellata	Ctel,Ngen,Paus
OG0000031	344	22	Metazoa	0
OG0000032	339	20	Metazoa	2	Tcas,Smed	Blan,Ofus,Skow,Spur
OG0000033	338	22	Metazoa	0		Spur
OG0000034	335	14	Nephrozoa	6	Ambulacraria,Vertebrata,Ecdysozoa	Ctel,Ofus
OG0000035	332	1	Skow	0		Skow
OG0000036	331	22	Metazoa	0		Dgyr,Eand,Hrob,Hsap
OG0000037	330	15	Bilateria	6	Deuterostomia,Ngen	Smed
OG0000038	328	22	Metazoa	0		Blan,Hrob,Nvec
OG0000039	315	22	Metazoa	0		Spur
OG0000040	314	14	Metazoa	8	Hmia,Vertebrata,Ecdysozoa,Smed,Dgyr,Hrob	Blan,Cgig
OG0000041	308	20	Metazoa	2	Hmia,Skow	Ctel,Ofus
OG0000042	308	18	Metazoa	4	Hsap,Smed,Dgyr,Eand	Ngen,Spur
OG0000043	307	19	Metazoa	3	Hmia,Ambulacraria	Eand,Hrob
OG0000044	303	22	Metazoa	0
OG0000045	300	17	Metazoa	5	Vertebrata,Smed,Ofus,Dgyr	Ngen,Skow
OG0000046	291	21	Metazoa	1	Smed	Ctel,Hrob
OG0000047	289	22	Metazoa	0		Blan,Skow
OG0000048	288	19	Metazoa	3	Smar,Cgig,Dgyr	Hmia
OG0000049	288	21	Metazoa	1	Hmia	Nvec
OG0000050	287	20	Metazoa	2	Hmia,Smed	Blan,Spur
OG0000051	287	21	Bilateria	0
OG0000052	283	1	Lgig	0		Lgig
OG0000053	282	22	Metazoa	0
OG0000054	279	21	Metazoa	1	Hmia	Tcas
OG0000055	278	8	Nephrozoa	12	Skow,Hsap,Tcas,Myes,Vermizoa,Dgyr,D,Lophophorata	Blan
OG0000056	272	22	Metazoa	0		Blan
OG0000057	271	1	Smed	0		Smed
OG0000058	266	20	Metazoa	2	Hmia,Smed	Ctel
OG0000059	265	22	Metazoa	0
OG0000060	261	18	Metazoa	4	Hmia,Skow,Ecdysozoa	Nvec
OG0000061	258	18	Metazoa	4	Smar,Lgig,Cgig,Dgyr	Eand,Hmia,Ngen
OG0000062	257	6	Nephrozoa	14	Spur,Vertebrata,Ecdysozoa,Mollusca,Vermizoa,C	Blan,Ofus,Paus
OG0000063	254	18	Metazoa	4	Vertebrata,Smar,Dgyr	Eand,Hmia,Hrob,Ngen
OG0000064	253	21	Metazoa	1	Lana	Lgig
OG0000065	253	22	Metazoa	0		Smed
OG0000066	248	21	Metazoa	1	Lana	Lgig
OG0000067	248	14	Metazoa	8	Deuterostomia,Ecdysozoa,Lana
OG0000068	245	19	Bilateria	2	Clitellata	Lluy,Spur
OG0000069	244	1	Smed	0		Smed
OG0000070	241	1	Smed	0		Smed
OG0000071	240	19	Metazoa	3	Smed,Dgyr,Eand	Blan,Nvec
OG0000072	240	20	Metazoa	2	Hmia,Smar	Blan,Cgig,Ctel
OG0000073	237	20	Metazoa	2	Smed,Hrob	Ofus,Skow,Spur
OG0000074	236	21	Metazoa	1	Hmia	Eand
OG0000075	234	21	Metazoa	1	Ofus	Nvec
OG0000076	234	22	Metazoa	0
OG0000077	234	22	Metazoa	0		Nvec,Skow
OG0000078	233	11	Bilateria	10	Chordata,Ecdysozoa,Mollusca,Ngen,Paus	Ctel,Lluy,Skow,Spur
OG0000079	230	20	Metazoa	2	Tcas,Hrob
OG0000080	229	21	Metazoa	1	Tcas	Blan,Nvec
OG0000081	226	22	Metazoa	0
OG0000082	225	22	Metazoa	0		Hrob
OG0000083	221	1	Hrob	0		Hrob
OG0000084	219	18	Metazoa	4	Hmia,Spur,Vermizoa	Lluy,Tcas
OG0000085	218	19	Metazoa	3	Vertebrata,Dgyr	Lluy,Spur
OG0000086	216	22	Metazoa	0
OG0000087	212	22	Metazoa	0
OG0000088	210	18	Metazoa	4	Hmia,Myes,Ofus,Paus	Ctel,Nvec,Skow,Spur
OG0000089	209	22	Metazoa	0
OG0000090	209	4	Nephrozoa	16	Ambulacraria,Hsap,Ecdysozoa,Mollusca,Vermizoa,Ofus,Dgyr,Ctel,Eand,Lophophorata	Hrob
OG0000091	209	3	Nephrozoa	17	Skow,Chordata,Ecdysozoa,Bivalvia,Vermizoa,Ofus,Dgyr,Lluy,Clitellata,Lophophorata	Lgig
OG0000092	208	22	Metazoa	0
OG0000093	206	21	Metazoa	1	Smar
OG0000094	206	18	Metazoa	4	Hmia,Spur,Hsap,Tcas	Blan
OG0000095	205	19	Metazoa	3	Hmia,Smed,Hrob	Skow
OG0000096	205	13	Bilateria	8	Vertebrata,Ecdysozoa,Vermizoa,Hrob,Lana	Cgig
OG0000097	204	19	Metazoa	3	Smed,Dgyr,Hrob
OG0000098	203	21	Metazoa	1	Hmia
OG0000099	203	22	Metazoa	0
OG0000100	202	19	Metazoa	3	Hmia,Smed,Dgyr	Blan,Ctel
OG0000101	202	22	Metazoa	0
OG0000102	201	21	Bilateria	0
OG0000103	199	22	Metazoa	0
OG0000104	195	19	Metazoa	3	Hmia,Myes,Lana	Nvec,Skow
OG0000105	193	19	Metazoa	3	Hmia,Ecdysozoa
OG0000106	192	22	Metazoa	0		Eand
OG0000107	191	22	Metazoa	0
OG0000108	190	20	Metazoa	2	Hmia,Smed	Lluy,Spur
OG0000109	190	21	Metazoa	1	Hsap
OG0000110	190	22	Metazoa	0		Hrob
OG0000111	190	22	Metazoa	0
OG0000112	190	2	Nephrozoa	18	Ambulacraria,Vertebrata,Ecdysozoa,Mollusca,Vermizoa,Ofus,Dgyr,Lluy,Clitellata,Lophophorata	Ctel
OG0000113	189	22	Metazoa	0		Spur
OG0000114	189	21	Metazoa	1	Hmia
OG0000115	189	20	Bilateria	1	Tcas	Myes
OG0000116	189	16	Metazoa	6	Hmia,Hsap,Cgig,Smed,Dgyr,Hrob	Ngen
OG0000117	187	22	Metazoa	0
OG0000118	186	22	Metazoa	0		Blan
OG0000119	186	22	Metazoa	0
OG0000120	183	20	Metazoa	2	Smed,Hrob
OG0000121	183	22	Metazoa	0
OG0000122	183	18	Metazoa	4	Hmia,Spur,Vertebrata
OG0000123	182	19	Metazoa	3	Hsap,Smed,Hrob
OG0000124	180	22	Metazoa	0
OG0000125	179	22	Metazoa	0
OG0000126	178	20	Bilateria	1	Tcas	Blan,Eand
OG0000127	178	22	Metazoa	0
OG0000128	178	22	Metazoa	0
OG0000129	177	15	Metazoa	7	Chordata,Smar,Smed,Dgyr,Hrob
OG0000130	176	10	Metazoa	12	Hmia,Spur,Vertebrata,Ecdysozoa,Smed,Dgyr,D,Paus	Blan,Cgig,Lgig,Lluy
OG0000131	176	20	Metazoa	2	Hmia,Smed	Spur
OG0000132	175	19	Metazoa	3	Tcas,Clitellata
OG0000133	174	22	Metazoa	0
OG0000134	173	21	Metazoa	1	Tcas
OG0000135	172	21	Metazoa	1	Smar
OG0000136	169	21	Metazoa	1	Hmia
OG0000137	168	19	Metazoa	3	Hmia,Smed,Dgyr	Nvec
OG0000138	168	22	Metazoa	0
OG0000139	168	22	Metazoa	0
OG0000140	166	14	Metazoa	8	Hsap,Ecdysozoa,Lgig,Vermizoa,Ofus,Dgyr	Blan,Hrob,Spur
OG0000141	166	22	Metazoa	0
OG0000142	165	20	Metazoa	2	Hmia,Tcas
OG0000143	164	1	Smed	0		Smed
OG0000144	163	22	Metazoa	0
OG0000145	161	21	Metazoa	1	Hmia	Ofus
OG0000146	161	20	Metazoa	2	Spur,Smed
OG0000147	161	21	Metazoa	1	Skow
OG0000148	159	22	Metazoa	0
OG0000149	159	15	Nephrozoa	5	Ambulacraria,Blan,Locu,Smed	Ctel,Ofus
OG0000150	157	22	Metazoa	0
OG0000151	157	1	Smed	0		Smed
OG0000152	156	11	Metazoa	11	Spur,Ecdysozoa,Vermizoa,B,Paus	Cgig,Lgig,Locu,Myes,Ofus
OG0000153	156	20	Bilateria	1	Cgig	Blan
OG0000154	156	18	Metazoa	4	Vertebrata,Ecdysozoa
OG0000155	155	15	Metazoa	7	Skow,Locu,Cgig,Ofus,Dgyr,Lophophorata	Hmia
OG0000156	155	16	Metazoa	6	Hmia,Vertebrata,Ecdysozoa,Smed
OG0000157	155	17	Bilateria	4	Smar,Lgig,Smed,Dgyr	Blan,Ngen,Skow
OG0000158	155	10	Metazoa	12	Deuterostomia,Lgig,Cgig,Ofus,Dgyr,Lluy,Hrob,Lana	Ctel,Eand,Smar,Smed,Tcas
OG0000159	155	1	Smed	0		Smed
OG0000160	154	22	Metazoa	0
OG0000161	153	22	Metazoa	0
OG0000162	152	22	Metazoa	0
OG0000163	152	1	Myes	0		Myes
OG0000164	151	17	Metazoa	5	Hsap,Myes,Ofus,Dgyr,Hrob	Hmia
OG0000165	151	22	Metazoa	0
OG0000166	151	1	Cgig	0		Cgig
OG0000167	150	20	Metazoa	2	Smar,Lluy
OG0000168	150	21	Metazoa	1	Hrob
OG0000169	150	1	Spur	0		Spur
OG0000170	149	14	Metazoa	8	Vertebrata,Ecdysozoa,Lgig,Myes,Smed,Dgyr	Lluy,Ngen
OG0000171	148	21	Metazoa	1	Tcas
OG0000172	148	22	Metazoa	0
OG0000173	147	20	Metazoa	2	Hmia,Smed	Myes
OG0000174	147	22	Metazoa	0
OG0000175	146	22	Metazoa	0
OG0000176	146	22	Metazoa	0
OG0000177	146	19	Metazoa	3	Hmia,Ecdysozoa
OG0000178	145	9	Nephrozoa	11	Skow,Vertebrata,Smar,Lgig,Cgig,Ofus,Dgyr,D	Blan
OG0000179	145	22	Metazoa	0
OG0000180	145	22	Metazoa	0
OG0000181	145	16	Nephrozoa	4	Ecdysozoa,Ngen,Paus
OG0000182	145	14	Metazoa	8	Chordata,Ecdysozoa,Smed,Ofus,Dgyr	Eand,Ngen
OG0000183	144	22	Metazoa	0
OG0000184	144	21	Metazoa	1	Lluy	Tcas
OG0000185	144	22	Metazoa	0		Spur
OG0000186	144	12	Metazoa	10	Skow,Chordata,Ecdysozoa,Smed,Ofus,Dgyr,Hrob	Cgig,Ctel,Lluy
OG0000187	144	16	Bilateria	5	Skow,Blan,Smed,Dgyr,Hrob	Ngen,Spur
OG0000188	144	3	A	5	Ngen,Ofus,Dgyr,Lluy,Ctel	Hrob
OG0000189	143	21	Metazoa	1	Smed
OG0000190	143	22	Metazoa	0
OG0000191	143	22	Metazoa	0
OG0000192	143	13	Protostomia	2	Smed,Ofus	Hrob,Ngen
OG0000193	143	1	Lgig	0		Lgig
OG0000194	142	21	Bilateria	0
OG0000195	142	22	Metazoa	0
OG0000196	141	19	Metazoa	3	Ecdysozoa,Smed	Ofus
OG0000197	140	21	Metazoa	1	Tcas
OG0000198	139	22	Metazoa	0
OG0000199	139	16	Metazoa	6	Hmia,Hsap,Smed,Ofus,Dgyr,Hrob	Skow
OG0000200	139	2	Nephrozoa	18	Ambulacraria,Blan,Hsap,Ecdysozoa,Mollusca,Vermizoa,Ofus,Dgyr,Lluy,Ctel,Eand,Lophophorata	Hrob
OG0000201	137	22	Metazoa	0
OG0000202	137	21	Metazoa	1	Blan
OG0000203	137	4	Nephrozoa	16	Spur,Chordata,Ecdysozoa,Mollusca,Vermizoa,Dgyr,Lluy,Clitellata,Paus	Ctel
OG0000204	136	13	Metazoa	9	Hmia,Spur,Vertebrata,Ecdysozoa,Smed,Clitellata	Cgig,Myes
OG0000205	136	22	Metazoa	0
OG0000206	136	22	Metazoa	0		Hsap
OG0000207	136	1	Hmia	0		Hmia
OG0000208	134	19	Metazoa	3	Hsap,Ecdysozoa
OG0000209	134	20	Metazoa	2	Hmia,Smed
OG0000210	134	14	Nephrozoa	6	Spur,Vertebrata,Tcas,Smed,Lana	Lluy,Ofus
OG0000211	134	13	Metazoa	9	Skow,Blan,Hsap,Mollusca,Ofus,Dgyr,Lana	Ngen,Tcas
OG0000212	133	22	Metazoa	0
OG0000213	133	22	Metazoa	0		Eand
OG0000214	133	21	Metazoa	1	Hmia
OG0000215	133	8	Metazoa	14	Hmia,Skow,Vertebrata,Ecdysozoa,Lgig,Cgig,Smed,Dgyr,Clitellata,Lophophorata	Ctel,Lluy,Ngen,Spur
OG0000216	132	1	Hmia	0		Hmia
OG0000217	131	11	Metazoa	11	Hmia,Ecdysozoa,Mollusca,Vermizoa,Lluy,Clitellata	Skow,Spur
OG0000218	131	21	Metazoa	1	Hmia
OG0000219	131	16	Metazoa	6	Vertebrata,Smar,Bivalvia,Dgyr	Hrob,Nvec
OG0000220	130	18	Metazoa	4	Hmia,Vertebrata,Dgyr
OG0000221	130	21	Bilateria	0
OG0000222	130	22	Metazoa	0		Smed
OG0000223	129	13	Nephrozoa	7	Spur,Ecdysozoa,Lgig,Vermizoa,Ctel	Lluy
OG0000224	129	20	Nephrozoa	0
OG0000225	129	14	Metazoa	8	Vertebrata,Ecdysozoa,Myes,Smed,Dgyr,Ctel	Ngen,Skow
OG0000226	128	22	Metazoa	0
OG0000227	128	22	Metazoa	0		Nvec
OG0000228	127	16	Nephrozoa	4	Ambulacraria,Ecdysozoa
OG0000229	127	20	Metazoa	2	Hmia,Smed
OG0000230	127	22	Metazoa	0
OG0000231	126	20	Metazoa	2	Vertebrata
OG0000232	125	22	Metazoa	0
OG0000233	125	14	Metazoa	8	Hmia,Hsap,Ecdysozoa,Smed,Dgyr,Clitellata
OG0000234	125	22	Metazoa	0
OG0000235	124	22	Metazoa	0
OG0000236	124	21	Metazoa	1	Dgyr
OG0000237	124	14	Bilateria	7	Vertebrata,Ofus,Dgyr,Lluy,Ctel,Paus	Smar
OG0000238	124	1	Hrob	0		Hrob
OG0000239	123	22	Metazoa	0
OG0000240	123	1	Eand	0		Eand
OG0000241	122	22	Metazoa	0
OG0000242	122	22	Metazoa	0
OG0000243	122	2	Deuterostomia	3	Skow,Blan,Hsap	Spur
OG0000244	122	1	Skow	0		Skow
OG0000245	121	21	Metazoa	1	Smed	Hsap,Locu
OG0000246	121	22	Metazoa	0
OG0000247	121	20	Metazoa	2	Tcas,Hrob
OG0000248	121	15	Nephrozoa	5	Vertebrata,Ecdysozoa,Smed	Ctel
OG0000249	121	1	Hrob	0		Hrob
OG0000250	121	1	Lgig	0		Lgig
OG0000251	121	1	Smar	0		Smar
OG0000252	120	20	Metazoa	2	Ecdysozoa
OG0000253	120	11	Metazoa	11	Hmia,Vertebrata,Lgig,Smed,Annelida	Blan,Ngen,Smar
OG0000254	120	22	Metazoa	0
OG0000255	120	1	Eand	0		Eand
OG0000256	119	22	Metazoa	0		Smar
OG0000257	119	22	Metazoa	0
OG0000258	119	13	Nephrozoa	7	Hsap,Tcas,Smed,Dgyr,D	Ngen,Skow
OG0000259	119	2	Lophotrochozoa	11	Lgig,Myes,Vermizoa,Ofus,C,Lophophorata	Cgig
OG0000260	119	2	Nephrozoa	18	Skow,Chordata,Ecdysozoa,Mollusca,A,Paus	Spur
OG0000261	118	22	Metazoa	0
OG0000262	118	22	Metazoa	0
OG0000263	118	20	Metazoa	2	Dgyr,Lluy	Smar
OG0000264	118	1	Paus	0		Paus
OG0000265	117	19	Metazoa	3	Ecdysozoa,Smed
OG0000266	117	16	Nephrozoa	4	Spur,Vertebrata,Tcas
OG0000267	117	22	Metazoa	0
OG0000268	116	19	Metazoa	3	Hmia,Tcas,Smed	Eand
OG0000269	116	11	Bilateria	10	Vertebrata,Ecdysozoa,Lgig,Smed,Dgyr,Eand,Lophophorata	Blan,Cgig,Lluy
OG0000270	116	22	Metazoa	0
OG0000271	116	21	Metazoa	1	Spur
OG0000272	115	22	Metazoa	0
OG0000273	115	22	Metazoa	0
OG0000274	115	20	Metazoa	2	Tcas,Hrob	Myes
OG0000275	115	16	Metazoa	6	Hmia,Vertebrata,Vermizoa,Hrob
OG0000276	115	22	Metazoa	0
OG0000277	115	22	Metazoa	0
OG0000278	115	22	Metazoa	0
OG0000279	115	14	Metazoa	8	Skow,Vertebrata,Ecdysozoa,Cgig,Smed,Dgyr	Hrob,Ngen
OG0000280	115	13	Bilateria	8	Ambulacraria,Vertebrata,Tcas,Smed,Dgyr,Hrob	Ngen
OG0000281	115	22	Metazoa	0
OG0000282	115	2	Bivalvia	0		Myes
OG0000283	114	22	Metazoa	0
OG0000284	114	11	Metazoa	11	Chordata,Ecdysozoa,Lgig,Cgig,Ofus,Dgyr,Lophophorata	Hmia,Hrob
OG0000285	113	22	Metazoa	0
OG0000286	113	21	Metazoa	1	Smed
OG0000287	113	19	Metazoa	3	Smed,Lluy,Hrob
OG0000288	113	12	Metazoa	10	Hmia,Spur,Ecdysozoa,Vermizoa,Dgyr,Lluy,Ctel,Hrob	Nvec
OG0000289	113	20	Metazoa	2	Ecdysozoa
OG0000290	113	1	Smed	0		Smed
OG0000291	112	18	Bilateria	3	Smar,Ngen,Paus	Skow
OG0000292	112	22	Metazoa	0
OG0000293	112	19	Metazoa	3	Spur,Smar,Smed
OG0000294	112	12	Metazoa	10	Hmia,Vertebrata,Smar,Lgig,Cgig,Smed,Dgyr,Clitellata	Skow
OG0000295	112	1	Hrob	0		Hrob
OG0000296	112	2	Nephrozoa	18	Skow,Chordata,Ecdysozoa,Mollusca,Vermizoa,Ofus,Dgyr,D,Lophophorata	Lluy
OG0000297	111	22	Metazoa	0
OG0000298	111	22	Metazoa	0
OG0000299	111	2	Clitellata	0		Hrob
OG0000300	110	20	Metazoa	2	Hmia,Dgyr
OG0000301	110	15	Metazoa	7	Hsap,Bivalvia,Smed,Ofus,Dgyr,Hrob
OG0000302	109	22	Metazoa	0
OG0000303	109	22	Metazoa	0
OG0000304	109	17	Bilateria	4	Ecdysozoa,Clitellata	Ofus
OG0000305	109	21	Metazoa	1	Hmia
OG0000306	109	19	Metazoa	3	Hmia,Ecdysozoa
OG0000307	109	16	Bilateria	5	Vermizoa,Clitellata,Paus	Ofus,Skow
OG0000308	109	2	C	2	Clitellata	Ctel
OG0000309	109	10	Metazoa	12	Blan,Hsap,Ecdysozoa,Mollusca,Smed,Ofus,Dgyr,Lophophorata	Ctel,Ngen,Spur
OG0000310	109	1	Skow	0		Skow
OG0000311	108	22	Metazoa	0
OG0000312	108	22	Metazoa	0		Lgig
OG0000313	108	4	Nephrozoa	16	Skow,Chordata,Ecdysozoa,Mollusca,Smed,Ofus,Dgyr,Clitellata,Lophophorata	Ngen
OG0000314	107	18	Metazoa	4	Smar,Vermizoa,Eand	Lluy
OG0000315	107	13	Metazoa	9	Skow,Hsap,Tcas,Cgig,Smed,Ofus,Dgyr,Lluy,Lana	Hmia
OG0000316	107	2	Clitellata	0		Hrob
OG0000317	106	6	Metazoa	16	Skow,Vertebrata,Ecdysozoa,Mollusca,Vermizoa,Ofus,Dgyr,D,Paus	Blan,Spur
OG0000318	106	21	Metazoa	1	Dgyr
OG0000319	106	21	Metazoa	1	Hrob
OG0000320	106	1	Hmia	0		Hmia
OG0000321	106	1	Skow	0		Skow
OG0000322	106	1	Smar	0		Smar
OG0000323	105	22	Metazoa	0
OG0000324	105	12	Nephrozoa	8	Skow,Ecdysozoa,Lgig,Vermizoa,Ctel,Hrob	Lluy
OG0000325	105	16	Bilateria	5	Spur,Vertebrata,Ecdysozoa	Lluy
OG0000326	105	17	Metazoa	5	Vertebrata,Ecdysozoa,Hrob
OG0000327	105	22	Metazoa	0
OG0000328	105	14	Metazoa	8	Hmia,Deuterostomia,Ecdysozoa	Ngen
OG0000329	104	12	Metazoa	10	Vertebrata,Ecdysozoa,Cgig,Smed,Ofus,Dgyr,Clitellata	Nvec,Paus,Spur
OG0000330	104	11	Protostomia	4	Mollusca,Paus	Dgyr,Eand,Ofus,Tcas
OG0000331	104	1	Smed	0		Smed
OG0000332	103	19	Metazoa	3	Hmia,Tcas,Hrob
OG0000333	103	16	Nephrozoa	4	Ecdysozoa,Vermizoa	Blan
OG0000334	103	22	Metazoa	0
OG0000335	103	14	Metazoa	8	Hmia,Vertebrata,Tcas,Smed,Dgyr,Clitellata	Ngen
OG0000336	103	21	Metazoa	1	Hmia
OG0000337	103	21	Metazoa	1	Smed
OG0000338	103	19	Metazoa	3	Ecdysozoa,Paus	Ngen,Smed
OG0000339	103	22	Metazoa	0
OG0000340	103	1	Smed	0		Smed
OG0000341	102	22	Metazoa	0
OG0000342	102	22	Metazoa	0
OG0000343	102	18	Metazoa	4	Smed,Lluy,Lophophorata	Lgig
OG0000344	101	22	Metazoa	0
OG0000345	101	13	Metazoa	9	Hmia,Spur,Chordata,Tcas,Lgig,Smed,Hrob	Lluy
OG0000346	101	1	Smar	0		Smar
OG0000347	100	19	Metazoa	3	Vertebrata,Hrob
OG0000348	100	15	Protostomia	0
OG0000349	100	2	A	6	Ngen,Ofus,Dgyr,Lluy,Ctel,Hrob	Eand
OG0000350	99	17	Metazoa	5	Vertebrata,Ecdysozoa,Smed
OG0000351	99	21	Metazoa	1	Tcas
OG0000352	99	17	Metazoa	5	Hmia,Smar,Smed,Lluy,Hrob
OG0000353	98	21	Bilateria	0
OG0000354	98	20	Metazoa	2	Hmia,Smed
OG0000355	98	22	Metazoa	0
OG0000356	98	21	Bilateria	0
OG0000357	98	20	Metazoa	2	Hmia,Hsap
OG0000358	98	22	Metazoa	0		Smed
OG0000359	98	22	Metazoa	0
OG0000360	97	21	Metazoa	1	Tcas
OG0000361	97	22	Metazoa	0
OG0000362	97	14	Metazoa	8	Hmia,Vertebrata,Smar,Smed,Dgyr,Ctel,Hrob	Skow
OG0000363	97	22	Metazoa	0
OG0000364	97	21	Metazoa	1	Smed
OG0000365	97	16	Nephrozoa	4	Ambulacraria,Vertebrata
OG0000366	97	22	Metazoa	0
OG0000367	97	14	Nephrozoa	6	Vertebrata,Tcas,Smed,Dgyr,Ctel	Eand,Spur
OG0000368	97	17	Metazoa	5	Hmia,Ambulacraria,Blan,Hsap
OG0000369	96	22	Metazoa	0
OG0000370	96	22	Metazoa	0
OG0000371	96	4	Metazoa	18	Hmia,Chordata,Ecdysozoa,Mollusca,A,Paus	Spur
OG0000372	95	21	Metazoa	1	Smed
OG0000373	95	22	Metazoa	0
OG0000374	95	21	Metazoa	1	Hmia
OG0000375	95	22	Metazoa	0
OG0000376	95	1	Lgig	0		Lgig
OG0000377	95	1	Lluy	0		Lluy
OG0000378	94	21	Metazoa	1	Tcas
OG0000379	94	1	Hrob	0		Hrob
OG0000380	93	15	Nephrozoa	5	Vertebrata,Ecdysozoa,Smed
OG0000381	93	17	Metazoa	5	Hmia,Skow,Vertebrata,Paus
OG0000382	93	18	Metazoa	4	Vertebrata,Ecdysozoa
OG0000383	93	19	Nephrozoa	1	Hrob
OG0000384	93	11	Nephrozoa	9	Hsap,Ecdysozoa,Cgig,Smed,Ofus,Dgyr,Clitellata	Ngen,Skow
OG0000385	93	21	Metazoa	1	Hmia
OG0000386	93	21	Metazoa	1	Smed
OG0000387	93	13	Lophotrochozoa	0		Ctel,Eand
OG0000388	92	19	Metazoa	3	Ecdysozoa,Hrob
OG0000389	92	17	Nephrozoa	3	Vermizoa,Dgyr
OG0000390	92	4	Metazoa	18	Hmia,Ambulacraria,Vertebrata,Ecdysozoa,Mollusca,Vermizoa,Ofus,Dgyr,Lluy,Ctel,Eand,Paus	Hrob
OG0000391	92	15	Nephrozoa	5	Vertebrata,Tcas,Vermizoa	Lluy
OG0000392	92	1	Eand	0		Eand
OG0000393	92	1	Smed	0		Smed
OG0000394	91	22	Metazoa	0		Tcas
OG0000395	91	22	Metazoa	0
OG0000396	91	21	Metazoa	1	Hmia
OG0000397	91	15	Nephrozoa	5	Spur,Chordata,Smed
OG0000398	91	11	Metazoa	11	Chordata,Ecdysozoa,Bivalvia,Smed,Dgyr,Clitellata	Hmia
OG0000399	90	8	Metazoa	14	Hmia,Spur,Mollusca,A,Paus	Blan,Nvec,Skow
OG0000400	90	22	Metazoa	0
OG0000401	90	13	Metazoa	9	Spur,Vertebrata,Smar,Ngen,Dgyr,Eand,Lophophorata	Ctel,Ofus
OG0000402	90	21	Metazoa	1	Tcas
OG0000403	90	22	Metazoa	0
OG0000404	90	22	Metazoa	0
OG0000405	90	22	Metazoa	0		Smar
OG0000406	90	22	Metazoa	0
OG0000407	90	6	E	4	Smed,Ofus,Dgyr,Eand	Ctel,Ngen
OG0000408	89	22	Metazoa	0
OG0000409	89	16	Metazoa	6	Hmia,B
OG0000410	89	21	Metazoa	1	Smed
OG0000411	89	22	Metazoa	0
OG0000412	89	22	Metazoa	0		Eand
OG0000413	89	16	Nephrozoa	4	Chordata,Smed	Tcas
OG0000414	88	2	Bilateria	19	Ambulacraria,Vertebrata,Protostomia	Blan
OG0000415	88	17	Metazoa	5	Hsap,Ecdysozoa,Dgyr,Hrob
OG0000416	88	15	Metazoa	7	Vertebrata,Ecdysozoa,Smed,Dgyr,Hrob
OG0000417	88	22	Metazoa	0
OG0000418	88	21	Metazoa	1	Smar
OG0000419	88	22	Metazoa	0
OG0000420	88	14	Nephrozoa	6	Skow,Ecdysozoa,Smed,Dgyr,Paus	Spur
OG0000421	88	22	Metazoa	0
OG0000422	87	20	Metazoa	2	Hmia,Spur	Blan
OG0000423	87	18	Metazoa	4	Spur,Ngen,Clitellata
OG0000424	87	14	Metazoa	8	Hmia,Ecdysozoa,Smed,Dgyr,Eand,Lophophorata	Blan
OG0000425	87	21	Metazoa	1	Smed
OG0000426	87	20	Metazoa	2	Hmia,Smed
OG0000427	87	22	Metazoa	0
OG0000428	87	11	Metazoa	11	Hmia,Skow,Vertebrata,Smar,Lgig,Cgig,Smed,Ofus,Dgyr,Hrob	Ngen,Tcas
OG0000429	86	22	Metazoa	0
OG0000430	86	18	Metazoa	4	Tcas,Lluy,Hrob,Paus
OG0000431	86	22	Metazoa	0
OG0000432	86	18	Metazoa	4	Smar,Ofus,Dgyr,Lluy
OG0000433	86	22	Metazoa	0
OG0000434	86	22	Metazoa	0
OG0000435	86	13	Metazoa	9	Hmia,Deuterostomia,Vermizoa,Hrob
OG0000436	86	7	Nephrozoa	13	Spur,Blan,Hsap,Ecdysozoa,Lgig,Vermizoa,Dgyr,D,Paus	Cgig,Skow
OG0000437	86	1	Ctel	0		Ctel
OG0000438	86	2	Nephrozoa	18	Spur,Chordata,Ecdysozoa,Mollusca,Vermizoa,Ofus,Dgyr,Lluy,Clitellata,Lophophorata	Skow
OG0000439	86	1	Eand	0		Eand
OG0000440	86	1	Eand	0		Eand
OG0000441	85	22	Metazoa	0
OG0000442	85	22	Metazoa	0
OG0000443	85	1	Blan	0		Blan
OG0000444	85	21	Bilateria	0
OG0000445	85	22	Metazoa	0
OG0000446	85	18	Nephrozoa	2	Spur,Dgyr
OG0000447	85	8	Nephrozoa	12	Skow,Chordata,Ecdysozoa,Bivalvia,Smed,Ofus,Dgyr,Paus	Eand,Hrob
OG0000448	85	1	Skow	0		Skow
OG0000449	84	19	Metazoa	3	Hmia,Smed,Dgyr
OG0000450	84	18	Metazoa	4	Vertebrata,Vermizoa	Hrob
OG0000451	84	22	Metazoa	0
OG0000452	84	22	Metazoa	0
OG0000453	84	11	Metazoa	11	Hmia,Vertebrata,Cgig,Smed,B,Paus	Skow,Spur
OG0000454	84	14	Metazoa	8	Hmia,Ambulacraria,Vertebrata,Vermizoa,Hrob
OG0000455	84	21	Metazoa	1	Blan	Hrob
OG0000456	84	2	Nephrozoa	18	Skow,Chordata,Ecdysozoa,Mollusca,A,Paus	Spur
OG0000457	83	15	Nephrozoa	5	Ambulacraria,Vertebrata,Paus
OG0000458	83	22	Metazoa	0
OG0000459	83	19	Metazoa	3	Bivalvia,Hrob
OG0000460	83	22	Metazoa	0
OG0000461	83	22	Metazoa	0
OG0000462	83	16	Metazoa	6	Ecdysozoa,D,Paus
OG0000463	83	22	Metazoa	0
OG0000464	83	7	Nephrozoa	13	Spur,Vertebrata,Ecdysozoa,Lgig,Myes,Smed,Dgyr,Lluy,Clitellata,Paus	Ngen
OG0000465	83	13	Lophotrochozoa	0		Smed
OG0000466	83	1	Dgyr	0		Dgyr
OG0000467	82	15	Metazoa	7	Hmia,Vertebrata,Ecdysozoa,Smed,Lluy
OG0000468	82	20	Metazoa	2	Hsap,Tcas
OG0000469	82	21	Metazoa	1	Hmia
OG0000470	82	22	Metazoa	0
OG0000471	82	17	Metazoa	5	Spur,Ecdysozoa,Smed,Paus
OG0000472	82	15	Metazoa	7	Hmia,Chordata,Ecdysozoa,Hrob
OG0000473	81	21	Metazoa	1	Hrob
OG0000474	81	21	Metazoa	1	Tcas
OG0000475	81	20	Metazoa	2	Ecdysozoa
OG0000476	81	22	Metazoa	0
OG0000477	81	22	Metazoa	0
OG0000478	81	22	Metazoa	0
OG0000479	81	22	Metazoa	0
OG0000480	81	1	Ctel	0		Ctel
OG0000481	80	16	Metazoa	6	Hmia,Hsap,Tcas,Smed,Dgyr,Hrob
OG0000482	80	19	Metazoa	3	Hmia,Tcas,Smed
OG0000483	80	22	Metazoa	0
OG0000484	80	22	Metazoa	0
OG0000485	79	15	Bilateria	6	Locu,Tcas,Cgig,Dgyr,Lluy,Hrob
OG0000486	79	18	Metazoa	4	Hmia,Smar,Smed,Dgyr
OG0000487	79	21	Bilateria	0
OG0000488	79	22	Metazoa	0
OG0000489	79	16	Metazoa	6	Hmia,Ecdysozoa,Smed,Clitellata
OG0000490	79	21	Metazoa	1	Spur
OG0000491	79	18	Metazoa	4	Vertebrata,Ecdysozoa
OG0000492	79	11	Nephrozoa	9	Ambulacraria,Vertebrata,Ecdysozoa,Vermizoa,Paus	Ofus
OG0000493	79	22	Metazoa	0
OG0000494	79	22	Metazoa	0
OG0000495	79	22	Metazoa	0
OG0000496	79	10	Metazoa	12	Hmia,Vertebrata,Ecdysozoa,Smed,B,Paus	Ngen
OG0000497	79	3	Mollusca	0		Myes
OG0000498	79	21	Metazoa	1	Blan
OG0000499	79	1	Ctel	0		Ctel
OG0000500	79	1	Ctel	0		Ctel
OG0000501	78	15	Metazoa	7	Skow,Vertebrata,Tcas,Smed,Hrob,Paus
OG0000502	78	8	Metazoa	14	Hmia,Spur,Hsap,Ecdysozoa,A,Paus	Cgig,Myes
OG0000503	78	21	Metazoa	1	Smar
OG0000504	78	18	Metazoa	4	Vertebrata,Dgyr,Hrob
OG0000505	78	21	Metazoa	1	Smed
OG0000506	78	18	Bilateria	3	Vertebrata,Tcas	Skow
OG0000507	78	21	Metazoa	1	Hrob
OG0000508	78	8	Metazoa	14	Hmia,Vertebrata,Ecdysozoa,Lgig,Myes,Smed,B,Lana	Ngen
OG0000509	78	21	Bilateria	0
OG0000510	78	20	Metazoa	2	Spur,Hrob
OG0000511	78	14	Metazoa	8	Skow,Vertebrata,Smed,Dgyr,Lluy,Clitellata
OG0000512	78	4	Lophotrochozoa	9	Myes,Vermizoa,Ofus,Dgyr,Lluy,Ctel,Lophophorata	Eand,Hrob
OG0000513	77	22	Metazoa	0
OG0000514	77	16	Metazoa	6	Hmia,Hsap,Tcas,Ngen,Dgyr,Paus	Hrob
OG0000515	77	21	Metazoa	1	Smed
OG0000516	77	8	Bilateria	13	Vertebrata,Tcas,Mollusca,Smed,Annelida	Blan,Ngen,Skow
OG0000517	77	22	Metazoa	0
OG0000518	77	22	Metazoa	0
OG0000519	77	9	Nephrozoa	11	Spur,Vertebrata,Ecdysozoa,Myes,Smed,Dgyr,D	Ngen
OG0000520	77	9	Bilateria	12	Ambulacraria,Hsap,Tcas,Mollusca,Ofus,Dgyr,Lluy,Ctel,Paus	Hmia
OG0000521	77	1	Ctel	0		Ctel
OG0000522	76	1	Blan	0		Blan
OG0000523	76	21	Metazoa	1	Hmia
OG0000524	76	11	Metazoa	11	Hmia,Vertebrata,Ecdysozoa,Cgig,Smed,Dgyr,D	Blan,Myes
OG0000525	76	16	Nephrozoa	4	Hsap,Ecdysozoa,Lluy
OG0000526	76	22	Metazoa	0
OG0000527	76	11	Metazoa	11	Skow,Ecdysozoa,Mollusca,Ofus,Dgyr,Lluy,Lophophorata	Smed
OG0000528	76	22	Metazoa	0
OG0000529	76	21	Metazoa	1	Dgyr
OG0000530	76	22	Metazoa	0
OG0000531	76	12	Metazoa	10	Hmia,Spur,Chordata,Smar,Smed,Ofus,Dgyr,Hrob
OG0000532	76	1	Lluy	0		Lluy
OG0000533	76	1	Locu	0		Locu
OG0000534	75	13	Metazoa	9	Hmia,Skow,Tcas,Vermizoa,Dgyr,Lluy,Clitellata	Cgig
OG0000535	75	20	Bilateria	1	Paus
OG0000536	75	10	Nephrozoa	10	Spur,Vertebrata,Ecdysozoa,Smed,Dgyr,D	Lluy
OG0000537	75	20	Metazoa	2	Ecdysozoa
OG0000538	75	20	Nephrozoa	0
OG0000539	75	20	Metazoa	2	Spur,Smar
OG0000540	75	22	Metazoa	0
OG0000541	75	14	Nephrozoa	6	Smed,Ofus,Dgyr,Lluy,Clitellata
OG0000542	75	19	Nephrozoa	1	Smar	Tcas
OG0000543	75	20	Metazoa	2	Hmia,Tcas
OG0000544	75	18	Nephrozoa	2	Tcas,Smed	Spur
OG0000545	75	13	Nephrozoa	7	Skow,Vertebrata,Ecdysozoa,Cgig,Smed	Eand
OG0000546	75	14	Metazoa	8	Hmia,Deuterostomia,Ecdysozoa	Eand
OG0000547	75	10	Metazoa	12	Hmia,Deuterostomia,Ecdysozoa,Vermizoa,Dgyr,Paus	Cgig,Myes
OG0000548	75	6	Bilateria	15	Deuterostomia,Smar,Lgig,Myes,Ngen,Ofus,Dgyr,Lluy,Eand,Lophophorata	Hrob,Smed
OG0000549	75	13	Metazoa	9	Blan,Ecdysozoa,Mollusca,Ngen,Lophophorata	Spur
OG0000550	75	1	Ctel	0		Ctel
OG0000551	75	7	Metazoa	15	Hmia,Deuterostomia,Bivalvia,Smed,Ofus,Dgyr,Lluy,Clitellata,Lana	Ngen
OG0000552	75	1	Myes	0		Myes
OG0000553	74	7	Metazoa	15	Hmia,Spur,Vertebrata,Ecdysozoa,Myes,Smed,Annelida,Paus	Blan,Skow
OG0000554	74	22	Metazoa	0
OG0000555	74	20	Metazoa	2	Hmia,Smed
OG0000556	74	14	Nephrozoa	6	Spur,Vertebrata,Smed,Clitellata	Lluy
OG0000557	74	21	Metazoa	1	Smar
OG0000558	74	19	Metazoa	3	Hmia,Tcas,Smed
OG0000559	74	21	Metazoa	1	Hrob
OG0000560	74	18	Bilateria	3	Smar,Smed,Hrob
OG0000561	74	22	Metazoa	0
OG0000562	74	21	Metazoa	1	Smar
OG0000563	74	13	Nephrozoa	7	Skow,Chordata,Ecdysozoa,Paus
OG0000564	74	1	Eand	0		Eand
OG0000565	73	14	Metazoa	8	Spur,Vertebrata,Smed,C	Ofus
OG0000566	73	14	Nephrozoa	6	Vertebrata,Smed,Dgyr,Lluy,Hrob
OG0000567	73	20	Metazoa	2	Tcas,Smed
OG0000568	73	22	Metazoa	0
OG0000569	73	20	Metazoa	2	Blan,Tcas
OG0000570	73	10	Metazoa	12	Hmia,Skow,Chordata,Ecdysozoa,Smed,Dgyr,Hrob,Lophophorata	Ctel,Lluy
OG0000571	73	8	Bilateria	13	Skow,Blan,Locu,Smar,Mollusca,Ngen,Ofus,Dgyr,Ctel,Lophophorata	Hmia,Smed
OG0000572	73	1	Smed	0		Smed
OG0000573	72	10	Nephrozoa	10	Spur,Vertebrata,Ecdysozoa,Smed,Ofus,Lluy,Clitellata	Blan,Cgig
OG0000574	72	19	Metazoa	3	Ecdysozoa,Lana
OG0000575	72	7	Metazoa	15	Hmia,Ambulacraria,Vertebrata,Ecdysozoa,Lgig,Myes,Smed,Dgyr,Lluy,Clitellata,Paus	Blan
OG0000576	72	22	Metazoa	0
OG0000577	72	21	Bilateria	0
OG0000578	72	10	Metazoa	12	Vertebrata,Ecdysozoa,Lgig,Smed,Ofus,Dgyr,D,Paus	Ngen
OG0000579	72	21	Metazoa	1	Ofus	Smar
OG0000580	72	12	Metazoa	10	Hmia,Vertebrata,Ecdysozoa,Smed,Ofus,Dgyr,Clitellata
OG0000581	72	22	Metazoa	0
OG0000582	71	14	Nephrozoa	6	Vertebrata,Smar,Vermizoa,Hrob
OG0000583	71	22	Metazoa	0
OG0000584	71	20	Metazoa	2	Hmia,Smed
OG0000585	71	20	Metazoa	2	Smar,Smed
OG0000586	71	15	Metazoa	7	Hmia,Spur,Hsap,Ecdysozoa,Ngen,Dgyr	Ctel
OG0000587	71	17	Metazoa	5	Hmia,Vertebrata,Tcas,Paus	Spur
OG0000588	71	22	Metazoa	0
OG0000589	71	16	Metazoa	6	Hmia,Cgig,Smed,Dgyr,Ctel,Hrob	Hsap,Locu
OG0000590	71	20	Metazoa	2	Hmia,Smed
OG0000591	71	21	Metazoa	1	Hrob
OG0000592	71	14	Metazoa	8	Vertebrata,Ecdysozoa,Vermizoa,Lluy,Hrob
OG0000593	71	20	Bilateria	1	Hrob	Spur
OG0000594	71	1	Cgig	0		Cgig
OG0000595	71	12	Metazoa	10	Hmia,Chordata,Ecdysozoa,Mollusca,Smed	Eand
OG0000596	71	4	Nephrozoa	16	Spur,Chordata,Ecdysozoa,Mollusca,Vermizoa,Ofus,Dgyr,Ctel,Lophophorata	Eand
OG0000597	71	2	Vertebrata	0		Locu
OG0000598	71	1	Smed	0		Smed
OG0000599	71	1	Tcas	0		Tcas
OG0000600	70	22	Metazoa	0
OG0000601	70	16	Metazoa	6	Hmia,Ecdysozoa,Smed,Ctel,Hrob
OG0000602	70	22	Metazoa	0
OG0000603	70	19	Metazoa	3	Tcas,Smed,Hrob
OG0000604	70	13	Metazoa	9	Hmia,Spur,Tcas,Cgig,Smed,Dgyr,Lluy,Clitellata
OG0000605	70	10	Bilateria	11	Ambulacraria,Vertebrata,Smar,Lgig,Cgig,Ngen,Dgyr,Hrob,Paus	Eand
OG0000606	70	22	Metazoa	0
OG0000607	70	14	Bilateria	7	Tcas,Lgig,Vermizoa,Lluy,Hrob,Paus
OG0000608	70	22	Metazoa	0
OG0000609	70	7	Metazoa	15	Hmia,Ecdysozoa,Mollusca,Vermizoa,Ofus,C,Lophophorata	Locu
OG0000610	70	21	Metazoa	1	Spur
OG0000611	70	13	Metazoa	9	Hmia,Spur,Chordata,Ecdysozoa,Clitellata
OG0000612	70	2	Bivalvia	0		Cgig
OG0000613	70	9	Metazoa	13	Hmia,Skow,Chordata,Ecdysozoa,Smed,Ofus,Dgyr,Clitellata,Lana	Myes,Paus
OG0000614	69	1	Blan	0		Blan
OG0000615	69	17	Metazoa	5	Vertebrata,Ecdysozoa,Eand
OG0000616	69	22	Metazoa	0
OG0000617	69	21	Bilateria	0
OG0000618	69	21	Metazoa	1	Hmia
OG0000619	69	19	Bilateria	2	Ecdysozoa
OG0000620	69	21	Metazoa	1	Dgyr
OG0000621	69	5	Nephrozoa	15	Ambulacraria,Vertebrata,Tcas,Lgig,Ngen,Annelida,Lophophorata	Cgig
OG0000622	69	17	Metazoa	5	Skow,Blan,Locu,Ecdysozoa
OG0000623	69	1	Hmia	0		Hmia
OG0000624	68	13	Metazoa	9	Hmia,Vertebrata,Ecdysozoa,Vermizoa,Clitellata
OG0000625	68	8	Metazoa	14	Hmia,Skow,Vertebrata,Ecdysozoa,Lgig,Myes,Smed,Dgyr,Clitellata,Lophophorata	Blan
OG0000626	68	22	Metazoa	0
OG0000627	68	13	Metazoa	9	Hmia,Spur,Vertebrata,Ecdysozoa,Vermizoa,Dgyr
OG0000628	68	22	Metazoa	0
OG0000629	68	22	Metazoa	0
OG0000630	68	13	Metazoa	9	Hmia,Vertebrata,Ecdysozoa,Smed,Dgyr,Clitellata
OG0000631	68	22	Metazoa	0
OG0000632	68	22	Metazoa	0
OG0000633	68	6	Metazoa	16	Hmia,Chordata,Ecdysozoa,E	Cgig,Lgig,Myes
OG0000634	68	1	Hmia	0		Hmia
OG0000635	68	8	Metazoa	14	Hmia,Chordata,Ecdysozoa,Bivalvia,Smed,Ofus,Dgyr,Ctel,Eand,Paus	Ngen,Nvec
OG0000636	68	1	Skow	0		Skow
OG0000637	67	7	Nephrozoa	13	Skow,Hsap,Ecdysozoa,Lgig,Vermizoa,B,Lana	Blan,Myes
OG0000638	67	5	Deuterostomia	0		Blan,Spur
OG0000639	67	11	Metazoa	11	Hmia,Spur,Ecdysozoa,Vermizoa,B	Cgig
OG0000640	67	22	Metazoa	0
OG0000641	67	19	Bilateria	2	Spur,Smed
OG0000642	67	21	Metazoa	1	Hrob
OG0000643	67	18	Metazoa	4	Hmia,Vertebrata,Hrob
OG0000644	67	20	Bilateria	1	Spur
OG0000645	67	20	Metazoa	2	Clitellata	Nvec
OG0000646	67	7	Nephrozoa	13	Spur,Vertebrata,Ecdysozoa,Lgig,Myes,Smed,B	Ngen
OG0000647	67	14	Nephrozoa	6	Ambulacraria,Blan,Hsap,Vermizoa
OG0000648	67	1	Eand	0		Eand
OG0000649	67	2	E	8	Smed,Annelida,Lana	Ngen
OG0000650	66	22	Metazoa	0
OG0000651	66	17	Metazoa	5	Hmia,Ecdysozoa,Vermizoa
OG0000652	66	12	Nephrozoa	8	Hsap,Ecdysozoa,Lgig,Smed,Dgyr,Hrob,Paus	Skow
OG0000653	66	21	Metazoa	1	Paus
OG0000654	66	5	Nephrozoa	15	Ambulacraria,Ecdysozoa,Mollusca,Vermizoa,Ofus,Dgyr,Ctel,Hrob,Lophophorata	Lluy
OG0000655	66	20	Metazoa	2	Hmia,Smed
OG0000656	66	21	Metazoa	1	Dgyr
OG0000657	66	10	Bilateria	11	Spur,Vertebrata,Ecdysozoa,Smed,Ofus,Dgyr,Lluy,Hrob,Paus	Ngen
OG0000658	66	21	Metazoa	1	Smed
OG0000659	66	21	Metazoa	1	Hmia
OG0000660	66	22	Metazoa	0
OG0000661	66	11	Nephrozoa	9	Spur,Hsap,Ecdysozoa,Vermizoa,Dgyr,Lluy,Ctel	Eand
OG0000662	66	15	Protostomia	0
OG0000663	66	10	Nephrozoa	10	Chordata,Ecdysozoa,Myes,Smed,Dgyr,Hrob,Paus	Lluy
OG0000664	66	2	C	2	Clitellata	Ctel
OG0000665	66	1	Ctel	0		Ctel
OG0000666	65	22	Metazoa	0
OG0000667	65	8	Nephrozoa	12	Spur,Vertebrata,Ecdysozoa,Lgig,Smed,Dgyr,D,Lana	Lluy
OG0000668	65	11	Metazoa	11	Hmia,Ambulacraria,Vertebrata,Ecdysozoa,Smed,Dgyr,Lophophorata	Ctel
OG0000669	65	22	Metazoa	0
OG0000670	65	19	Metazoa	3	Ecdysozoa,Smed
OG0000671	65	17	Nephrozoa	3	Smed,Lluy,Hrob
OG0000672	65	22	Metazoa	0
OG0000673	65	12	Metazoa	10	Hmia,Hsap,Tcas,Smed,B,Paus
OG0000674	65	12	Nephrozoa	8	Ambulacraria,Ecdysozoa,Smed,Dgyr,Lluy,Hrob
OG0000675	65	13	Metazoa	9	Hmia,Ambulacraria,Ecdysozoa,Dgyr,Lluy,Ctel,Hrob
OG0000676	65	14	Bilateria	7	Skow,Vertebrata,Ecdysozoa,Dgyr,Paus
OG0000677	65	21	Bilateria	0
OG0000678	65	22	Metazoa	0
OG0000679	65	12	Metazoa	10	Hmia,Skow,Ecdysozoa,Smed,B
OG0000680	65	22	Metazoa	0
OG0000681	65	21	Metazoa	1	Tcas
OG0000682	65	22	Metazoa	0
OG0000683	65	1	Ctel	0		Ctel
OG0000684	65	8	Nephrozoa	12	Spur,Chordata,Ecdysozoa,Bivalvia,Smed,Ofus,Dgyr,Lluy	Eand,Ngen
OG0000685	65	7	Metazoa	15	Spur,Chordata,Ecdysozoa,Lgig,Cgig,Smed,B,Lana	Ngen
OG0000686	65	2	Lophotrochozoa	11	Bivalvia,Vermizoa,Ofus,Dgyr,D,Lophophorata	Lgig
OG0000687	65	1	Spur	0		Spur
OG0000688	64	21	Bilateria	0
OG0000689	64	21	Metazoa	1	Ofus
OG0000690	64	21	Metazoa	1	Hrob
OG0000691	64	18	Nephrozoa	2	Smed,Hrob
OG0000692	64	14	Metazoa	8	Hmia,Spur,Ecdysozoa,Vermizoa,Ofus,Paus
OG0000693	64	12	Metazoa	10	Hmia,Ambulacraria,Vertebrata,Ecdysozoa,Vermizoa,Hrob	Blan
OG0000694	64	22	Metazoa	0
OG0000695	64	22	Metazoa	0
OG0000696	64	20	Bilateria	1	Ctel
OG0000697	64	21	Bilateria	0
OG0000698	64	22	Metazoa	0
OG0000699	64	12	Nephrozoa	8	Hsap,Lgig,Cgig,Ofus,Dgyr,Lluy,Hrob,Lana	Tcas
OG0000700	64	12	Metazoa	10	Deuterostomia,Mollusca,Smed,Paus
OG0000701	64	11	Bilateria	10	Skow,Chordata,Smar,Cgig,Smed,Dgyr,Lophophorata	Hmia,Lgig
OG0000702	64	1	Eand	0		Eand
OG0000703	63	20	Metazoa	2	Ecdysozoa
OG0000704	63	17	Metazoa	5	Hmia,Smed,Dgyr,Clitellata
OG0000705	63	16	Bilateria	5	Ecdysozoa,Cgig,Smed,Ctel
OG0000706	63	16	Nephrozoa	4	Ecdysozoa,Vermizoa	Skow
OG0000707	63	20	Metazoa	2	Vertebrata
OG0000708	63	7	Bilateria	14	Ambulacraria,Hsap,Ecdysozoa,Bivalvia,Smed,Ofus,Dgyr,Lluy,Ctel,Hrob,Lana	Blan
OG0000709	63	22	Metazoa	0
OG0000710	63	21	Metazoa	1	Tcas
OG0000711	63	22	Metazoa	0
OG0000712	63	18	Metazoa	4	Hmia,Myes,Smed,Hrob	Ctel
OG0000713	63	21	Metazoa	1	Smed
OG0000714	63	13	Protostomia	2	Dgyr,Paus	Eand
OG0000715	63	20	Metazoa	2	Spur,Blan
OG0000716	62	21	Metazoa	1	Smar
OG0000717	62	21	Metazoa	1	Smar
OG0000718	62	13	Bilateria	8	Spur,Locu,Smar,Bivalvia,Smed,Ctel,Paus	Blan,Tcas
OG0000719	62	16	Nephrozoa	4	Spur,Locu,Ecdysozoa
OG0000720	62	5	Bilateria	16	Spur,Protostomia	Blan,Skow
OG0000721	62	20	Metazoa	2	Dgyr,Lluy
OG0000722	62	21	Metazoa	1	Hmia
OG0000723	62	17	Metazoa	5	Tcas,Smed,Dgyr,Lluy,Hrob
OG0000724	62	21	Metazoa	1	Spur
OG0000725	62	22	Metazoa	0
OG0000726	62	22	Metazoa	0
OG0000727	62	14	Nephrozoa	6	Spur,Chordata,Ecdysozoa
OG0000728	62	15	Metazoa	7	Deuterostomia,Ecdysozoa
OG0000729	62	1	Hmia	0		Hmia
OG0000730	61	21	Metazoa	1	Hsap
OG0000731	61	22	Metazoa	0
OG0000732	61	17	Metazoa	5	Hmia,Ecdysozoa,Vermizoa
OG0000733	61	13	Nephrozoa	7	Vertebrata,Ecdysozoa,Vermizoa,Dgyr	Lluy
OG0000734	61	11	Metazoa	11	Hmia,Skow,Vertebrata,Smed,Ofus,Dgyr,Lluy,Clitellata,Paus	Ngen,Spur
OG0000735	61	20	Nephrozoa	0
OG0000736	61	21	Metazoa	1	Smed
OG0000737	61	20	Metazoa	2	Hmia,Smed
OG0000738	61	9	Metazoa	13	Hmia,Ambulacraria,Vertebrata,Ecdysozoa,Smed,Ofus,C	Paus
OG0000739	61	21	Metazoa	1	Spur
OG0000740	61	22	Metazoa	0
OG0000741	61	22	Metazoa	0
OG0000742	61	19	Metazoa	3	Hmia,Spur,Hrob
OG0000743	61	13	Bilateria	8	Vertebrata,Tcas,Ngen,Dgyr,Lluy,Clitellata	Smed
OG0000744	61	5	Protostomia	10	Smar,Lgig,Vermizoa,Ofus,Dgyr,Lluy,Hrob,Lophophorata	Eand
OG0000745	61	7	Metazoa	15	Hmia,Chordata,Ecdysozoa,Bivalvia,Ngen,Ofus,Lluy,Clitellata,Lophophorata	Nvec
OG0000746	61	3	Metazoa	19	Deuterostomia,Ecdysozoa,Mollusca,A,Paus	Nvec
OG0000747	61	2	Metazoa	20	Hmia,Deuterostomia,Ecdysozoa,Mollusca,Vermizoa,Ofus,Dgyr,D,Lophophorata	Nvec
OG0000748	61	1	Skow	0		Skow
OG0000749	61	1	Smed	0		Smed
OG0000750	61	1	Spur	0		Spur
OG0000751	61	1	Spur	0		Spur
OG0000752	60	7	Nephrozoa	13	Vertebrata,Ecdysozoa,Smed,Annelida,Lophophorata	Blan
OG0000753	60	22	Metazoa	0
OG0000754	60	11	Nephrozoa	9	Spur,Vertebrata,Ecdysozoa,Vermizoa,Ctel,Paus
OG0000755	60	22	Metazoa	0
OG0000756	60	17	Metazoa	5	Hmia,Hsap,Smed,Lluy,Hrob	Tcas
OG0000757	60	21	Metazoa	1	Hsap
OG0000758	60	22	Metazoa	0
OG0000759	60	15	Nephrozoa	5	Vertebrata,Ecdysozoa,Paus
OG0000760	60	22	Metazoa	0
OG0000761	60	9	Metazoa	13	Hmia,Vertebrata,Ecdysozoa,Lgig,Myes,Smed,Lluy,Clitellata,Lophophorata	Blan
OG0000762	60	22	Metazoa	0
OG0000763	60	22	Metazoa	0
OG0000764	60	21	Metazoa	1	Spur
OG0000765	60	20	Metazoa	2	Vertebrata
OG0000766	60	21	Metazoa	1	Smar
OG0000767	60	15	Nephrozoa	5	Vertebrata,Tcas,Clitellata
OG0000768	60	19	Metazoa	3	Hsap,Dgyr,Hrob
OG0000769	60	22	Metazoa	0
OG0000770	60	12	Nephrozoa	8	Vertebrata,Ecdysozoa,Smed,Dgyr,Lluy,Hrob
OG0000771	60	19	Metazoa	3	Smar,Lgig,Ctel
OG0000772	60	19	Nephrozoa	1	Dgyr
OG0000773	60	21	Metazoa	1	Paus
OG0000774	60	12	Metazoa	10	Hmia,Deuterostomia,Ecdysozoa,Vermizoa
OG0000775	60	13	Lophotrochozoa	0		Eand
OG0000776	60	6	Nephrozoa	14	Skow,Chordata,Tcas,Mollusca,Smed,Ofus,Dgyr,Hrob,Lophophorata	Eand,Ngen
OG0000777	60	2	E	8	Vermizoa,Ofus,Dgyr,D,Paus	Lluy
OG0000778	59	11	Metazoa	11	Ecdysozoa,Lgig,Myes,Vermizoa,Dgyr,D,Paus	Blan,Nvec
OG0000779	59	14	Bilateria	7	Smed,B,Paus
OG0000780	59	6	Nephrozoa	14	Spur,Vertebrata,Ecdysozoa,Lgig,Myes,Smed,Dgyr,D,Lophophorata	Lluy
OG0000781	59	2	Nephrozoa	18	Ambulacraria,Vertebrata,Ecdysozoa,Lgig,Myes,E	Blan
OG0000782	59	22	Metazoa	0
OG0000783	59	14	Nephrozoa	6	Vertebrata,Lgig,Smed,Hrob,Lana
OG0000784	59	18	Metazoa	4	Vertebrata,Clitellata
OG0000785	59	22	Metazoa	0
OG0000786	59	22	Metazoa	0
OG0000787	59	17	Metazoa	5	Ecdysozoa,Smed,Clitellata
OG0000788	59	22	Metazoa	0
OG0000789	59	20	Metazoa	2	Ecdysozoa
OG0000790	59	22	Metazoa	0
OG0000791	59	20	Metazoa	2	Tcas,Smed
OG0000792	59	9	Nephrozoa	11	Spur,Tcas,Mollusca,Smed,Dgyr,Lluy,Ctel,Hrob,Paus
OG0000793	59	22	Metazoa	0
OG0000794	59	20	Metazoa	2	Ecdysozoa
OG0000795	59	17	Nephrozoa	3	Ecdysozoa,Paus
OG0000796	59	19	Metazoa	3	Hmia,Lluy,Hrob
OG0000797	59	22	Metazoa	0
OG0000798	59	21	Metazoa	1	Hmia
OG0000799	59	13	Nephrozoa	7	Spur,Chordata,Ecdysozoa,Hrob
OG0000800	59	19	Bilateria	2	Blan,Smed
OG0000801	59	13	Metazoa	9	Hmia,Chordata,Ecdysozoa,Bivalvia,Smed	Skow
OG0000802	59	3	Lophotrochozoa	10	Bivalvia,Smed,Ofus,Dgyr,Lluy,Clitellata,Lophophorata	Ctel
OG0000803	58	17	Nephrozoa	3	Spur,Tcas,Hrob
OG0000804	58	12	Nephrozoa	8	Ambulacraria,Ecdysozoa,Vermizoa,Ofus,Dgyr
OG0000805	58	11	Nephrozoa	9	Hsap,Ecdysozoa,Cgig,Vermizoa,Dgyr,Clitellata
OG0000806	58	22	Metazoa	0
OG0000807	58	22	Metazoa	0
OG0000808	58	22	Metazoa	0
OG0000809	58	22	Metazoa	0
OG0000810	58	19	Nephrozoa	1	Hrob
OG0000811	58	21	Metazoa	1	Hrob
OG0000812	58	21	Metazoa	1	Dgyr
OG0000813	58	6	Metazoa	16	Hmia,Ambulacraria,Vertebrata,Ecdysozoa,Myes,Smed,B,Lophophorata	Ngen
OG0000814	58	22	Metazoa	0
OG0000815	58	17	Nephrozoa	3	Tcas,Dgyr,Lluy
OG0000816	58	22	Metazoa	0
OG0000817	58	16	Nephrozoa	4	Vertebrata,Tcas,Smed	Lgig
OG0000818	58	21	Bilateria	0
OG0000819	58	22	Metazoa	0
OG0000820	58	17	Metazoa	5	Vertebrata,Ecdysozoa,Smed
OG0000821	58	22	Metazoa	0
OG0000822	58	19	Metazoa	3	Smed,Dgyr,Hrob
OG0000823	58	21	Metazoa	1	Tcas
OG0000824	58	14	Metazoa	8	Hmia,Spur,Ecdysozoa,Dgyr,Clitellata,Lana	Skow
OG0000825	58	22	Metazoa	0
OG0000826	58	22	Metazoa	0
OG0000827	58	20	Metazoa	2	Hsap,Eand
OG0000828	58	10	Protostomia	5	Lgig,Vermizoa,Lluy,Paus	Ctel
OG0000829	58	1	Hrob	0		Hrob
OG0000830	57	21	Metazoa	1	Ctel
OG0000831	57	7	Nephrozoa	13	Ambulacraria,Vertebrata,Ecdysozoa,Lgig,Myes,Vermizoa,Ofus,Clitellata	Blan
OG0000832	57	18	Nephrozoa	2	Ngen,Ofus
OG0000833	57	6	Nephrozoa	14	Skow,Hsap,Ecdysozoa,Mollusca,Vermizoa,Ofus,Dgyr,Lluy,Eand,Paus	Blan,Hrob
OG0000834	57	22	Metazoa	0
OG0000835	57	14	Nephrozoa	6	Vertebrata,Ecdysozoa,Lluy,Hrob
OG0000836	57	20	Metazoa	2	Hmia,Smed
OG0000837	57	21	Metazoa	1	Smed
OG0000838	57	20	Metazoa	2	Smed,Hrob
OG0000839	57	17	Metazoa	5	Spur,Locu,Tcas,Clitellata
OG0000840	57	22	Metazoa	0
OG0000841	57	21	Metazoa	1	Eand
OG0000842	57	21	Metazoa	1	Hmia
OG0000843	57	18	Metazoa	4	Hmia,Cgig,Lluy,Hrob
OG0000844	57	22	Metazoa	0
OG0000845	57	20	Metazoa	2	Hmia,Hrob
OG0000846	57	6	Metazoa	16	Hmia,Ambulacraria,Vertebrata,Ecdysozoa,Myes,Smed,B,Lophophorata	Ngen
OG0000847	57	22	Metazoa	0
OG0000848	57	17	Metazoa	5	Spur,Vertebrata,Ecdysozoa
OG0000849	57	20	Bilateria	1	Ctel
OG0000850	57	22	Metazoa	0
OG0000851	57	22	Metazoa	0
OG0000852	57	21	Metazoa	1	Hmia
OG0000853	57	1	Ctel	0		Ctel
OG0000854	57	1	Lluy	0		Lluy
OG0000855	57	1	Lluy	0		Lluy
OG0000856	57	1	Nvec	0		Nvec
OG0000857	56	6	Metazoa	16	Hmia,Skow,Vertebrata,Ecdysozoa,Mollusca,Smed,B,Lana	Blan
OG0000858	56	21	Metazoa	1	Tcas
OG0000859	56	17	Metazoa	5	Hmia,Vertebrata,Smed,Dgyr
OG0000860	56	22	Metazoa	0
OG0000861	56	22	Metazoa	0
OG0000862	56	22	Metazoa	0
OG0000863	56	15	Metazoa	7	Hmia,Spur,Smed,C
OG0000864	56	22	Metazoa	0
OG0000865	56	22	Metazoa	0
OG0000866	56	6	Bilateria	15	Vertebrata,Tcas,Mollusca,A,Lana	Spur
OG0000867	56	16	Metazoa	6	Hsap,Ecdysozoa,Lgig,Ofus,Eand
OG0000868	56	22	Metazoa	0
OG0000869	56	22	Metazoa	0
OG0000870	56	19	Metazoa	3	Smar,Smed,Hrob
OG0000871	56	21	Metazoa	1	Hmia
OG0000872	56	22	Metazoa	0
OG0000873	56	21	Metazoa	1	Hrob
OG0000874	56	22	Metazoa	0
OG0000875	56	22	Metazoa	0
OG0000876	56	13	Metazoa	9	Hmia,Mollusca,Vermizoa,Clitellata,Lana
OG0000877	56	21	Bilateria	0
OG0000878	56	22	Metazoa	0
OG0000879	56	21	Bilateria	0
OG0000880	56	22	Metazoa	0
OG0000881	56	6	Nephrozoa	14	Spur,Vertebrata,Ecdysozoa,Lgig,Smed,B,Lophophorata	Ngen
OG0000882	56	8	Metazoa	14	Hmia,Deuterostomia,Ecdysozoa,Lgig,Smed,Dgyr,D
OG0000883	56	13	Lophotrochozoa	0
OG0000884	56	15	Nephrozoa	5	Ambulacraria,Blan,Hsap,Tcas
OG0000885	56	2	D	1	Eand	Ctel
OG0000886	56	7	Nephrozoa	13	Skow,Chordata,Lgig,Cgig,Vermizoa,Ofus,Dgyr,Lluy,Lophophorata	Hrob,Smar
OG0000887	56	1	Eand	0		Eand
OG0000888	56	1	Hrob	0		Hrob
OG0000889	56	1	Hsap	0		Hsap
OG0000890	56	1	Lluy	0		Lluy
OG0000891	56	1	Ngen	0		Ngen
OG0000892	56	1	Ofus	0		Ofus
OG0000893	55	13	Nephrozoa	7	Ecdysozoa,Smed,Dgyr,Lluy,Clitellata
OG0000894	55	5	Nephrozoa	15	Skow,Vertebrata,Smar,Bivalvia,Vermizoa,Ofus,Dgyr,Lluy,Clitellata,Lophophorata	Blan
OG0000895	55	22	Metazoa	0
OG0000896	55	17	Metazoa	5	Hmia,Ecdysozoa,Smed,Lluy
OG0000897	55	13	Metazoa	9	Hmia,Vertebrata,Tcas,Lgig,Smed,Dgyr,Lophophorata
OG0000898	55	3	Deuterostomia	2	Vertebrata	Blan
OG0000899	55	11	Metazoa	11	Hmia,Vertebrata,Tcas,Vermizoa,B
OG0000900	55	22	Metazoa	0
OG0000901	55	22	Metazoa	0
OG0000902	55	17	Bilateria	4	Spur,Vertebrata,Tcas
OG0000903	55	21	Metazoa	1	Cgig
OG0000904	55	21	Metazoa	1	Hrob
OG0000905	55	20	Metazoa	2	Hmia,Lluy
OG0000906	55	22	Metazoa	0
OG0000907	55	22	Metazoa	0
OG0000908	55	5	Nephrozoa	15	Ambulacraria,Hsap,Ecdysozoa,Bivalvia,Ngen,Ofus,C,Lophophorata	Smed
OG0000909	55	22	Metazoa	0
OG0000910	55	22	Metazoa	0
OG0000911	55	22	Metazoa	0
OG0000912	55	21	Metazoa	1	Spur
OG0000913	55	21	Metazoa	1	Smed	Hsap
OG0000914	55	11	Metazoa	11	Hmia,Spur,Chordata,Ecdysozoa,Smed,Ofus,Dgyr,Hrob	Skow
OG0000915	55	13	Protostomia	2	Smed,Ctel	Eand
OG0000916	55	2	Bivalvia	0		Myes
OG0000917	55	7	Metazoa	15	Hmia,Spur,Chordata,Ecdysozoa,Bivalvia,Smed,Ofus,Dgyr,Hrob,Lophophorata
OG0000918	55	1	Hmia	0		Hmia
OG0000919	55	2	Metazoa	20	Hmia,Spur,Chordata,Protostomia	Skow
OG0000920	55	1	Skow	0		Skow
OG0000921	55	1	Smar	0		Smar
OG0000922	54	22	Metazoa	0
OG0000923	54	22	Metazoa	0
OG0000924	54	22	Metazoa	0
OG0000925	54	21	Metazoa	1	Tcas
OG0000926	54	2	Nephrozoa	18	Ambulacraria,Vertebrata,Ecdysozoa,Mollusca,Vermizoa,Ofus,Dgyr,D,Lophophorata	Lluy
OG0000927	54	21	Metazoa	1	Smar
OG0000928	54	22	Metazoa	0
OG0000929	54	22	Metazoa	0
OG0000930	54	22	Metazoa	0
OG0000931	54	22	Metazoa	0
OG0000932	54	20	Nephrozoa	0
OG0000933	54	8	Metazoa	14	Hmia,Ambulacraria,Vertebrata,Ecdysozoa,Vermizoa,Dgyr,Lluy,Clitellata,Paus
OG0000934	54	10	Nephrozoa	10	Locu,Ecdysozoa,Bivalvia,Smed,Ofus,Dgyr,Clitellata	Skow
OG0000935	54	21	Metazoa	1	Smed
OG0000936	54	1	Eand	0		Eand
OG0000937	54	7	Bilateria	14	Spur,Chordata,Ecdysozoa,Bivalvia,Smed,Ofus,Dgyr,D	Ngen
OG0000938	54	1	Hrob	0		Hrob
OG0000939	54	1	Smed	0		Smed
OG0000940	54	1	Smed	0		Smed
OG0000941	53	20	Metazoa	2	Spur,Dgyr
OG0000942	53	8	Metazoa	14	Hmia,Spur,Vertebrata,Ecdysozoa,Bivalvia,Smed,Ofus,Dgyr,Lluy,Hrob,Lana	Blan
OG0000943	53	6	Nephrozoa	14	Spur,Vertebrata,Ecdysozoa,Lgig,Myes,Smed,Dgyr,Lluy,Ctel,Hrob,Lophophorata	Ngen
OG0000944	53	22	Metazoa	0
OG0000945	53	17	Metazoa	5	Ecdysozoa,Lgig,Dgyr,Lluy
OG0000946	53	22	Metazoa	0
OG0000947	53	21	Metazoa	1	Spur
OG0000948	53	22	Metazoa	0
OG0000949	53	19	Metazoa	3	Hmia,Smar,Hrob
OG0000950	53	21	Metazoa	1	Locu	Smed
OG0000951	53	22	Metazoa	0
OG0000952	53	17	Metazoa	5	Hmia,Tcas,Myes,Smed,Hrob
OG0000953	53	22	Metazoa	0
OG0000954	53	21	Metazoa	1	Spur
OG0000955	53	18	Metazoa	4	Hmia,Smed,Dgyr,Hrob	Lluy
OG0000956	53	22	Metazoa	0
OG0000957	53	22	Metazoa	0
OG0000958	53	9	Bilateria	12	Ambulacraria,Vertebrata,Lgig,Myes,Smed,Ofus,C	Dgyr,Tcas
OG0000959	53	20	Metazoa	2	Hmia,Ofus
OG0000960	53	22	Metazoa	0
OG0000961	53	22	Metazoa	0
OG0000962	53	17	Metazoa	5	Spur,Tcas,Ofus,Clitellata
OG0000963	53	22	Metazoa	0
OG0000964	53	15	Metazoa	7	Hmia,Spur,Vertebrata,Tcas,Smed,Hrob
OG0000965	53	18	Metazoa	4	Hmia,Skow,Smar,Dgyr
OG0000966	53	22	Metazoa	0
OG0000967	53	22	Metazoa	0
OG0000968	53	15	Protostomia	0
OG0000969	53	1	Skow	0		Skow
OG0000970	53	1	Smed	0		Smed
OG0000971	52	20	Metazoa	2	Tcas,Lgig
OG0000972	52	12	Metazoa	10	Hmia,Ambulacraria,Vertebrata,B
OG0000973	52	22	Metazoa	0
OG0000974	52	16	Metazoa	6	Ecdysozoa,Dgyr,Lluy,Clitellata
OG0000975	52	20	Metazoa	2	Cgig,Eand	Spur
OG0000976	52	22	Metazoa	0
OG0000977	52	16	Metazoa	6	Skow,Vertebrata,Ecdysozoa,Smed
OG0000978	52	21	Metazoa	1	Hmia
OG0000979	52	17	Metazoa	5	Hmia,Smed,Ofus,Dgyr,Hrob
OG0000980	52	22	Metazoa	0
OG0000981	52	22	Metazoa	0
OG0000982	52	20	Metazoa	2	Ecdysozoa
OG0000983	52	19	Nephrozoa	1	Smed
OG0000984	52	22	Metazoa	0
OG0000985	52	16	Metazoa	6	Hmia,Locu,Tcas,Lgig,Smed,Dgyr	Lluy
OG0000986	52	21	Metazoa	1	Tcas
OG0000987	52	22	Metazoa	0
OG0000988	52	22	Metazoa	0
OG0000989	52	22	Metazoa	0
OG0000990	52	21	Metazoa	1	Smed
OG0000991	52	22	Metazoa	0
OG0000992	52	21	Metazoa	1	Smed
OG0000993	52	22	Metazoa	0
OG0000994	52	9	Bilateria	12	Skow,Hsap,Ecdysozoa,Bivalvia,Vermizoa,Ofus,Dgyr,Lophophorata	Ctel,Hrob
OG0000995	52	21	Metazoa	1	Blan
OG0000996	52	15	Protostomia	0
OG0000997	52	5	Lophotrochozoa	8	Bivalvia,Smed,Ofus,Dgyr,Hrob,Lophophorata	Lluy,Ngen
OG0000998	52	8	Metazoa	14	Hmia,Deuterostomia,Ecdysozoa,Lgig,Cgig,Vermizoa,Ctel,Paus	Hrob,Lluy
OG0000999	52	1	Eand	0		Eand
OG0001000	52	1	Lluy	0		Lluy
OG0001001	52	1	Nvec	0		Nvec
OG0001002	52	1	Ofus	0		Ofus
OG0001003	52	1	Smed	0		Smed
OG0001004	51	16	Metazoa	6	Hmia,Tcas,Mollusca,Hrob
OG0001005	51	22	Metazoa	0
OG0001006	51	22	Metazoa	0
OG0001007	51	18	Metazoa	4	Myes,Vermizoa,Ofus
OG0001008	51	22	Metazoa	0
OG0001009	51	22	Metazoa	0
OG0001010	51	22	Metazoa	0
OG0001011	51	13	Metazoa	9	Hmia,Ambulacraria,Ecdysozoa,Smed,Ofus,Dgyr,Hrob
OG0001012	51	16	Metazoa	6	Skow,Vertebrata,Tcas,Dgyr,Paus
OG0001013	51	20	Metazoa	2	Ecdysozoa
OG0001014	51	12	Metazoa	10	Hmia,Vertebrata,Ecdysozoa,Lgig,Cgig,Smed,Dgyr,Hrob
OG0001015	51	11	Metazoa	11	Spur,Vertebrata,Ecdysozoa,Smed,Dgyr,Lluy,Ctel,Hrob,Paus	Ngen
OG0001016	51	22	Metazoa	0
OG0001017	51	13	Metazoa	9	Hmia,Vertebrata,Ecdysozoa,Vermizoa,Dgyr,Paus
OG0001018	51	22	Metazoa	0
OG0001019	51	21	Metazoa	1	Hmia
OG0001020	51	19	Bilateria	2	Ecdysozoa
OG0001021	51	21	Metazoa	1	Hmia
OG0001022	51	15	Nephrozoa	5	Smar,Smed,Dgyr,Lluy,Paus
OG0001023	51	22	Metazoa	0
OG0001024	51	21	Metazoa	1	Hrob
OG0001025	51	22	Metazoa	0
OG0001026	51	22	Metazoa	0
OG0001027	51	22	Metazoa	0
OG0001028	51	21	Metazoa	1	Dgyr
OG0001029	51	22	Metazoa	0
OG0001030	51	7	Lophotrochozoa	6	Vermizoa,Dgyr,Lluy,Ctel,Hrob	Myes
OG0001031	51	14	Nephrozoa	6	Chordata,Ecdysozoa,Smed
OG0001032	51	2	C	2	Clitellata	Ctel
OG0001033	51	2	Protostomia	13	Smar,Mollusca,Vermizoa,Ofus,Dgyr,Lluy,Clitellata,Lophophorata	Tcas
OG0001034	51	1	Eand	0		Eand
OG0001035	51	1	Smed	0		Smed
OG0001036	50	21	Metazoa	1	Lgig
OG0001037	50	22	Metazoa	0
OG0001038	50	8	Metazoa	14	Hmia,Vertebrata,Ecdysozoa,Bivalvia,Vermizoa,Ofus,Dgyr,Clitellata,Paus	Lluy
OG0001039	50	21	Metazoa	1	Smed
OG0001040	50	21	Metazoa	1	Hmia
OG0001041	50	22	Metazoa	0
OG0001042	50	21	Metazoa	1	Spur
OG0001043	50	18	Metazoa	4	Spur,Vertebrata,Smed
OG0001044	50	22	Metazoa	0
OG0001045	50	19	Metazoa	3	Spur,Tcas,Smed
OG0001046	50	21	Metazoa	1	Lluy
OG0001047	50	20	Metazoa	2	Ngen,Dgyr
OG0001048	50	22	Metazoa	0
OG0001049	50	22	Metazoa	0
OG0001050	50	5	Nephrozoa	15	Spur,Vertebrata,Ecdysozoa,Bivalvia,Smed,Ofus,Dgyr,Lluy,Clitellata,Lophophorata	Ctel,Ngen
OG0001051	50	22	Metazoa	0
OG0001052	50	21	Metazoa	1	Tcas
OG0001053	50	22	Metazoa	0
OG0001054	50	21	Metazoa	1	Spur
OG0001055	50	17	Metazoa	5	Hmia,Lgig,Cgig,Smed,Paus
OG0001056	50	21	Metazoa	1	Cgig
OG0001057	50	22	Metazoa	0
OG0001058	50	22	Metazoa	0
OG0001059	50	22	Metazoa	0
OG0001060	50	14	Metazoa	8	Hmia,Ecdysozoa,Lgig,Cgig,Dgyr,Hrob,Paus
OG0001061	50	19	Metazoa	3	Hmia,Smed,Hrob
OG0001062	50	20	Nephrozoa	0
OG0001063	50	21	Metazoa	1	Myes
OG0001064	50	22	Metazoa	0
OG0001065	50	22	Metazoa	0
OG0001066	50	6	Metazoa	16	Hmia,Spur,Vertebrata,Ecdysozoa,Mollusca,Vermizoa,Ofus,Dgyr,Ctel,Hrob,Paus	Eand
OG0001067	50	21	Metazoa	1	Spur
OG0001068	50	22	Metazoa	0
OG0001069	50	15	Nephrozoa	5	Skow,Chordata,Paus	Hrob
OG0001070	50	21	Metazoa	1	Blan
OG0001071	50	7	Lophotrochozoa	6	Vermizoa,Ofus,Dgyr,Lophophorata	Ctel
OG0001072	50	10	Lophotrochozoa	3	Vermizoa,Lluy	Ctel
OG0001073	50	20	Bilateria	1	Blan
OG0001074	50	2	A	6	Smed,Ofus,Dgyr,Lluy,Clitellata	Ctel
OG0001075	50	5	Nephrozoa	15	Skow,Chordata,Tcas,Lgig,Cgig,Vermizoa,Ofus,Dgyr,Lluy,Hrob,Lophophorata	Myes
OG0001076	50	2	Nephrozoa	18	Spur,Chordata,Ecdysozoa,Mollusca,Vermizoa,Ofus,Dgyr,Lluy,Ctel,Hrob,Lophophorata	Eand
OG0001077	50	1	Hmia	0		Hmia
OG0001078	50	1	Hrob	0		Hrob
OG0001079	50	3	Deuterostomia	2	Spur,Blan	Locu
OG0001080	49	22	Metazoa	0
OG0001081	49	16	Metazoa	6	Hmia,Vertebrata,Ecdysozoa,Eand
OG0001082	49	7	Metazoa	15	Hmia,Spur,Vertebrata,Ecdysozoa,Lgig,Cgig,Vermizoa,Dgyr,Clitellata,Lophophorata	Blan
OG0001083	49	22	Metazoa	0
OG0001084	49	7	Bilateria	14	Ambulacraria,Vertebrata,Smar,Lgig,Myes,Ngen,Dgyr,Lluy,Clitellata,Lophophorata	Ctel
OG0001085	49	22	Metazoa	0
OG0001086	49	14	Metazoa	8	Hmia,Ambulacraria,Ecdysozoa,Myes,Smed,Hrob
OG0001087	49	22	Metazoa	0
OG0001088	49	20	Metazoa	2	Smed,Hrob
OG0001089	49	19	Metazoa	3	Smar,Myes,Ofus
OG0001090	49	19	Bilateria	2	Vertebrata
OG0001091	49	22	Metazoa	0
OG0001092	49	20	Metazoa	2	Spur,Cgig
OG0001093	49	18	Metazoa	4	Ecdysozoa,Cgig,Smed
OG0001094	49	22	Metazoa	0
OG0001095	49	22	Metazoa	0
OG0001096	49	22	Metazoa	0
OG0001097	49	22	Metazoa	0
OG0001098	49	21	Metazoa	1	Smed
OG0001099	49	22	Metazoa	0
OG0001100	49	15	Metazoa	7	Lgig,Smed,B
OG0001101	49	17	Nephrozoa	3	Spur,Hsap,Smar
OG0001102	49	19	Metazoa	3	Hmia,Spur,Tcas
OG0001103	49	22	Metazoa	0
OG0001104	49	21	Metazoa	1	Smed
OG0001105	49	18	Bilateria	3	Spur,Hsap,Ngen
OG0001106	49	21	Metazoa	1	Smar
OG0001107	49	22	Metazoa	0
OG0001108	49	15	Nephrozoa	5	Spur,Vertebrata,Smar,Smed
OG0001109	49	18	Metazoa	4	Hmia,Spur,Tcas,Hrob
OG0001110	49	22	Metazoa	0
OG0001111	49	22	Metazoa	0
OG0001112	49	13	Metazoa	9	Ambulacraria,Ecdysozoa,Lgig,Smed,Dgyr,Lluy,Hrob
OG0001113	49	19	Bilateria	2	Hsap,Smed
OG0001114	49	7	Lophotrochozoa	6	Lgig,Ngen,Lluy,Hrob,Lophophorata	Cgig
OG0001115	49	14	Bilateria	7	Blan,Hsap,Lgig,Vermizoa,Dgyr,Hrob	Smar
OG0001116	49	2	Lophotrochozoa	11	Lgig,Myes,Vermizoa,Ofus,Dgyr,Lluy,Ctel,Hrob,Lophophorata	Eand
OG0001117	49	21	Metazoa	1	Blan
OG0001118	49	1	Ctel	0		Ctel
OG0001119	49	10	Bilateria	11	Ambulacraria,Blan,Locu,Smar,Mollusca,Smed,Ofus,Paus	Eand
OG0001120	49	3	Bilateria	18	Deuterostomia,Ecdysozoa,Mollusca,Vermizoa,Ofus,Dgyr,Lluy,Ctel,Lophophorata	Eand,Hmia
OG0001121	49	1	Eand	0		Eand
OG0001122	49	2	Nephrozoa	18	Spur,Chordata,Ecdysozoa,Mollusca,Vermizoa,B,Lophophorata	Skow
OG0001123	49	1	Skow	0		Skow
OG0001124	49	1	Tcas	0		Tcas
OG0001125	48	5	Nephrozoa	15	Ambulacraria,Vertebrata,Ecdysozoa,Bivalvia,Smed,Dgyr,Lluy,Clitellata,Lophophorata	Blan
OG0001126	48	3	Metazoa	19	Hmia,Spur,Vertebrata,Protostomia	Blan,Skow
OG0001127	48	21	Metazoa	1	Smed
OG0001128	48	20	Bilateria	1	Smar
OG0001129	48	20	Metazoa	2	Hmia,Hsap
OG0001130	48	5	Metazoa	17	Hmia,Ambulacraria,Vertebrata,Ecdysozoa,E	Myes
OG0001131	48	22	Metazoa	0
OG0001132	48	22	Metazoa	0
OG0001133	48	10	Nephrozoa	10	Vertebrata,Ecdysozoa,Myes,Vermizoa,Hrob,Lophophorata
OG0001134	48	21	Metazoa	1	Smar
OG0001135	48	22	Metazoa	0
OG0001136	48	15	Nephrozoa	5	Vertebrata,Smed,Clitellata
OG0001137	48	20	Metazoa	2	Tcas,Dgyr
OG0001138	48	12	Nephrozoa	8	Vertebrata,Ecdysozoa,Vermizoa,Lluy,Hrob
OG0001139	48	21	Metazoa	1	Smar
OG0001140	48	10	Nephrozoa	10	Ecdysozoa,Lgig,Vermizoa,Ofus,Dgyr,Ctel,Hrob,Lana
OG0001141	48	21	Metazoa	1	Smar
OG0001142	48	21	Metazoa	1	Hrob
OG0001143	48	22	Metazoa	0
OG0001144	48	22	Metazoa	0
OG0001145	48	21	Metazoa	1	Dgyr
OG0001146	48	22	Metazoa	0
OG0001147	48	19	Metazoa	3	Ecdysozoa,Smed
OG0001148	48	22	Metazoa	0
OG0001149	48	22	Metazoa	0
OG0001150	48	22	Metazoa	0
OG0001151	48	22	Metazoa	0
OG0001152	48	22	Metazoa	0
OG0001153	48	21	Metazoa	1	Tcas
OG0001154	48	13	Nephrozoa	7	Vertebrata,Ecdysozoa,Smed,Ofus,Lana
OG0001155	48	22	Metazoa	0
OG0001156	48	20	Metazoa	2	Hmia,Dgyr
OG0001157	48	4	Nephrozoa	16	Ambulacraria,Vertebrata,Ecdysozoa,Mollusca,Vermizoa,Ofus,Dgyr,D	Lluy
OG0001158	48	21	Bilateria	0
OG0001159	48	15	Protostomia	0
OG0001160	48	21	Metazoa	1	Blan
OG0001161	48	7	Lophotrochozoa	6	Vermizoa,Ofus,Dgyr,Lluy,Hrob	Eand
OG0001162	48	21	Metazoa	1	Blan
OG0001163	48	1	Lluy	0		Lluy
OG0001164	48	1	Smed	0		Smed
OG0001165	47	14	Nephrozoa	6	Ambulacraria,Vertebrata,Ecdysozoa
OG0001166	47	22	Metazoa	0
OG0001167	47	22	Metazoa	0
OG0001168	47	22	Metazoa	0
OG0001169	47	10	Nephrozoa	10	Ecdysozoa,Lgig,Vermizoa,B	Blan
OG0001170	47	21	Metazoa	1	Dgyr
OG0001171	47	22	Metazoa	0
OG0001172	47	20	Metazoa	2	Dgyr,Lana
OG0001173	47	12	Bilateria	9	Ambulacraria,Vertebrata,Ecdysozoa,Lgig,Ngen,Hrob
OG0001174	47	18	Metazoa	4	Hmia,Spur,Ecdysozoa
OG0001175	47	21	Metazoa	1	Lluy
OG0001176	47	7	Metazoa	15	Protostomia	Spur
OG0001177	47	17	Metazoa	5	Tcas,Ngen,Clitellata,Paus
OG0001178	47	10	Metazoa	12	Hmia,Spur,Ecdysozoa,Lgig,Vermizoa,Ofus,Dgyr,D
OG0001179	47	21	Metazoa	1	Smed
OG0001180	47	19	Metazoa	3	Hmia,Dgyr,Lluy
OG0001181	47	2	Deuterostomia	3	Skow,Vertebrata	Spur
OG0001182	47	22	Metazoa	0
OG0001183	47	22	Metazoa	0
OG0001184	47	21	Metazoa	1	Hmia
OG0001185	47	21	Metazoa	1	Dgyr
OG0001186	47	22	Metazoa	0
OG0001187	47	22	Metazoa	0
OG0001188	47	21	Metazoa	1	Spur
OG0001189	47	21	Bilateria	0
OG0001190	47	22	Metazoa	0
OG0001191	47	22	Metazoa	0
OG0001192	47	20	Metazoa	2	Ofus,Dgyr
OG0001193	47	21	Metazoa	1	Smed
OG0001194	47	21	Metazoa	1	Smed
OG0001195	47	22	Metazoa	0
OG0001196	47	22	Metazoa	0
OG0001197	47	18	Metazoa	4	Hmia,Skow,Tcas,Dgyr
OG0001198	47	22	Metazoa	0
OG0001199	47	21	Metazoa	1	Hmia
OG0001200	47	18	Metazoa	4	Hmia,Tcas,Smed,Hrob
OG0001201	47	12	Nephrozoa	8	Vertebrata,Ecdysozoa,Ngen,Lluy,Lophophorata	Dgyr
OG0001202	47	2	Lophotrochozoa	11	Lgig,Myes,Vermizoa,B,Lophophorata	Cgig
OG0001203	47	13	Metazoa	9	Hmia,Ambulacraria,Blan,Tcas,Dgyr,Lluy,Clitellata
OG0001204	47	4	Annelida	2	Dgyr,Hrob	Ctel,Eand
OG0001205	47	3	Protostomia	12	Mollusca,A,Paus	Smar,Tcas
OG0001206	47	1	Myes	0		Myes
OG0001207	47	1	Ngen	0		Ngen
OG0001208	47	1	Tcas	0		Tcas
OG0001209	46	1	Blan	0		Blan
OG0001210	46	3	Bilateria	18	Ambulacraria,Vertebrata,Ecdysozoa,Lgig,Myes,E	Blan
OG0001211	46	22	Metazoa	0
OG0001212	46	22	Metazoa	0
OG0001213	46	16	Metazoa	6	Vertebrata,Ecdysozoa,Smed,Hrob
OG0001214	46	20	Metazoa	2	Spur,Ngen
OG0001215	46	17	Nephrozoa	3	Vertebrata,Lluy
OG0001216	46	19	Metazoa	3	Hmia,Ecdysozoa
OG0001217	46	22	Metazoa	0
OG0001218	46	22	Metazoa	0
OG0001219	46	21	Metazoa	1	Skow
OG0001220	46	21	Metazoa	1	Tcas
OG0001221	46	20	Bilateria	1	Spur
OG0001222	46	19	Nephrozoa	1	Ctel
OG0001223	46	22	Metazoa	0
OG0001224	46	22	Metazoa	0
OG0001225	46	15	Nephrozoa	5	Smar,Vermizoa,Dgyr,Lluy
OG0001226	46	22	Metazoa	0
OG0001227	46	22	Metazoa	0
OG0001228	46	22	Metazoa	0
OG0001229	46	14	Metazoa	8	Ecdysozoa,Smed,B
OG0001230	46	22	Metazoa	0
OG0001231	46	7	Nephrozoa	13	Ambulacraria,Vertebrata,Ecdysozoa,Mollusca,Vermizoa,Dgyr,Paus
OG0001232	46	19	Metazoa	3	Hmia,Tcas,Hrob
OG0001233	46	22	Metazoa	0
OG0001234	46	18	Metazoa	4	Hmia,Spur,Vertebrata
OG0001235	46	22	Metazoa	0
OG0001236	46	21	Metazoa	1	Dgyr
OG0001237	46	21	Metazoa	1	Dgyr
OG0001238	46	22	Metazoa	0
OG0001239	46	20	Bilateria	1	Tcas
OG0001240	46	21	Metazoa	1	Smed
OG0001241	46	22	Metazoa	0
OG0001242	46	14	Protostomia	1	Lgig	Myes
OG0001243	46	21	Metazoa	1	Blan
OG0001244	46	6	Metazoa	16	Hmia,Spur,Chordata,Ecdysozoa,Lgig,Myes,Smed,Annelida	Skow
OG0001245	46	11	Bilateria	10	Skow,Blan,Lgig,Cgig,Ngen,Dgyr,Lluy,Hrob,Lophophorata
OG0001246	46	2	A	6	Smed,Ofus,Dgyr,Lluy,Clitellata	Ngen
OG0001247	46	3	Bilateria	18	Spur,Chordata,Ecdysozoa,Mollusca,Vermizoa,Ofus,Dgyr,Lluy,Clitellata,Lophophorata	Skow
OG0001248	46	1	Hmia	0		Hmia
OG0001249	46	4	Nephrozoa	16	Skow,Chordata,Smar,Mollusca,Smed,Annelida,Lana	Ngen,Paus
OG0001250	45	20	Nephrozoa	0
OG0001251	45	19	Metazoa	3	Ofus,Clitellata
OG0001252	45	22	Metazoa	0
OG0001253	45	22	Metazoa	0
OG0001254	45	22	Metazoa	0
OG0001255	45	20	Metazoa	2	Hmia,Hrob
OG0001256	45	21	Metazoa	1	Hmia
OG0001257	45	22	Metazoa	0
OG0001258	45	20	Metazoa	2	Hmia,Smar
OG0001259	45	20	Nephrozoa	0
OG0001260	45	21	Metazoa	1	Hmia
OG0001261	45	22	Metazoa	0
OG0001262	45	22	Metazoa	0
OG0001263	45	3	Nephrozoa	17	Ambulacraria,Vertebrata,Ecdysozoa,Mollusca,Vermizoa,Dgyr,Lluy,Ctel,Eand,Lophophorata	Hrob
OG0001264	45	15	Metazoa	7	Hmia,Hsap,Ecdysozoa,Smed,Hrob,Paus
OG0001265	45	19	Metazoa	3	Smed,Clitellata
OG0001266	45	21	Metazoa	1	Hsap
OG0001267	45	22	Metazoa	0
OG0001268	45	20	Metazoa	2	Hmia,Smed
OG0001269	45	21	Metazoa	1	Smed
OG0001270	45	22	Metazoa	0
OG0001271	45	22	Metazoa	0
OG0001272	45	22	Metazoa	0
OG0001273	45	22	Metazoa	0
OG0001274	45	22	Metazoa	0
OG0001275	45	21	Metazoa	1	Smed
OG0001276	45	21	Metazoa	1	Tcas
OG0001277	45	21	Bilateria	0
OG0001278	45	20	Metazoa	2	Tcas,Hrob
OG0001279	45	19	Metazoa	3	Smed,Dgyr,Paus
OG0001280	45	17	Metazoa	5	Locu,Ofus,Dgyr,Lluy,Lana
OG0001281	45	20	Metazoa	2	Tcas,Smed
OG0001282	45	22	Metazoa	0
OG0001283	45	21	Metazoa	1	Ctel
OG0001284	45	20	Metazoa	2	Tcas,Cgig
OG0001285	45	22	Metazoa	0
OG0001286	45	21	Bilateria	0
OG0001287	45	21	Metazoa	1	Smed
OG0001288	45	22	Metazoa	0
OG0001289	45	21	Metazoa	1	Spur
OG0001290	45	16	Nephrozoa	4	Smed,Ofus,Dgyr,Paus
OG0001291	45	13	Nephrozoa	7	Ambulacraria,Vertebrata,Ecdysozoa,Paus
OG0001292	45	22	Metazoa	0
OG0001293	45	22	Metazoa	0
OG0001294	45	9	Nephrozoa	11	Spur,Vertebrata,Ecdysozoa,Smed,Dgyr,Clitellata,Lophophorata
OG0001295	45	22	Metazoa	0
OG0001296	45	21	Metazoa	1	Smed
OG0001297	45	21	Metazoa	1	Dgyr
OG0001298	45	21	Metazoa	1	Hmia
OG0001299	45	22	Metazoa	0
OG0001300	45	22	Metazoa	0
OG0001301	45	22	Metazoa	0
OG0001302	45	11	Nephrozoa	9	Spur,Chordata,Ecdysozoa,Smed,Lluy,Hrob	Ofus
OG0001303	45	13	Lophotrochozoa	0		Hrob
OG0001304	45	1	Ctel	0		Ctel
OG0001305	45	7	Lophotrochozoa	6	Bivalvia,Vermizoa,Ofus,Dgyr	Ctel
OG0001306	45	4	Nephrozoa	16	Spur,Chordata,Ecdysozoa,Mollusca,Vermizoa,Dgyr,Lluy,Clitellata,Lana	Ofus
OG0001307	45	2	Clitellata	0		Eand
OG0001308	45	3	Annelida	3	Dgyr,Lluy,Ctel	Hrob
OG0001309	45	1	Hrob	0		Hrob
OG0001310	45	1	Hsap	0		Hsap
OG0001311	45	1	Hsap	0		Hsap
OG0001312	45	1	Lgig	0		Lgig
OG0001313	45	1	Skow	0		Skow
OG0001314	45	1	Skow	0		Skow
OG0001315	45	1	Spur	0		Spur
OG0001316	44	17	Metazoa	5	Ecdysozoa,Cgig,Smed,Hrob
OG0001317	44	21	Metazoa	1	Hmia
OG0001318	44	21	Metazoa	1	Lluy
OG0001319	44	22	Metazoa	0
OG0001320	44	21	Metazoa	1	Smar
OG0001321	44	5	Metazoa	17	Hmia,Spur,Vertebrata,Ecdysozoa,Mollusca,Vermizoa,B,Paus	Blan
OG0001322	44	15	Metazoa	7	Hmia,Mollusca,Ngen,Lluy,Hrob
OG0001323	44	22	Metazoa	0
OG0001324	44	14	Metazoa	8	Spur,Vertebrata,Tcas,Myes,Smed,Dgyr,Paus
OG0001325	44	21	Metazoa	1	Spur
OG0001326	44	22	Metazoa	0
OG0001327	44	22	Metazoa	0
OG0001328	44	22	Metazoa	0
OG0001329	44	22	Metazoa	0
OG0001330	44	14	Nephrozoa	6	Ambulacraria,Ecdysozoa,Smed,Dgyr
OG0001331	44	22	Metazoa	0
OG0001332	44	20	Metazoa	2	Hmia,Smed
OG0001333	44	19	Metazoa	3	Lgig,Dgyr,Ctel
OG0001334	44	20	Metazoa	2	Smar,Dgyr
OG0001335	44	22	Metazoa	0
OG0001336	44	21	Metazoa	1	Tcas
OG0001337	44	22	Metazoa	0
OG0001338	44	17	Metazoa	5	Vertebrata,Smed,Lluy,Hrob
OG0001339	44	22	Metazoa	0
OG0001340	44	22	Metazoa	0
OG0001341	44	22	Metazoa	0
OG0001342	44	21	Metazoa	1	Tcas
OG0001343	44	18	Metazoa	4	Hmia,Hsap,Smar,Hrob
OG0001344	44	22	Metazoa	0
OG0001345	44	22	Metazoa	0
OG0001346	44	21	Metazoa	1	Smar
OG0001347	44	19	Metazoa	3	Hmia,Tcas,Dgyr
OG0001348	44	22	Metazoa	0
OG0001349	44	9	Nephrozoa	11	Spur,Hsap,Ecdysozoa,Vermizoa,B
OG0001350	44	20	Metazoa	2	Clitellata
OG0001351	44	22	Metazoa	0
OG0001352	44	22	Metazoa	0
OG0001353	44	22	Metazoa	0
OG0001354	44	9	Metazoa	13	Skow,Chordata,Ecdysozoa,Myes,Smed,Ofus,Dgyr,Hrob,Lophophorata
OG0001355	44	12	Metazoa	10	Hmia,Deuterostomia,Ecdysozoa,Smed,Paus
OG0001356	44	13	Protostomia	2	Tcas,Smed
OG0001357	44	20	Metazoa	2	Blan,Dgyr
OG0001358	44	4	Lophotrochozoa	9	Myes,Ngen,B,Lophophorata	Ofus
OG0001359	44	17	Nephrozoa	3	Chordata
OG0001360	44	16	Metazoa	6	Chordata,Ecdysozoa,Ngen
OG0001361	44	15	Protostomia	0
OG0001362	44	20	Metazoa	2	Hmia,Blan
OG0001363	44	8	Lophotrochozoa	5	Myes,Smed,Dgyr,Hrob,Paus
OG0001364	44	6	Annelida	0		Ctel
OG0001365	44	5	Protostomia	10	Smar,Bivalvia,Ngen,Ofus,Dgyr,Lluy,Clitellata,Lana	Lgig
OG0001366	44	1	Eand	0		Eand
OG0001367	44	1	Hmia	0		Hmia
OG0001368	44	2	Nephrozoa	18	Spur,Chordata,Ecdysozoa,Mollusca,Smed,Annelida,Lophophorata	Ngen
OG0001369	44	1	Ngen	0		Ngen
OG0001370	44	1	Smar	0		Smar
OG0001371	44	1	Spur	0		Spur
OG0001372	44	1	Tcas	0		Tcas
OG0001373	43	14	Metazoa	8	Hmia,Hsap,Bivalvia,Ofus,Dgyr,Eand,Lana
OG0001374	43	22	Metazoa	0
OG0001375	43	21	Metazoa	1	Lluy
OG0001376	43	15	Nephrozoa	5	Ecdysozoa,Smed,Dgyr,Hrob
OG0001377	43	17	Metazoa	5	Ecdysozoa,Vermizoa,Lluy
OG0001378	43	21	Bilateria	0
OG0001379	43	21	Metazoa	1	Smed
OG0001380	43	22	Metazoa	0
OG0001381	43	20	Metazoa	2	Tcas,Ofus
OG0001382	43	19	Metazoa	3	Hmia,Smed,Hrob
OG0001383	43	20	Metazoa	2	Hmia,Smed
OG0001384	43	22	Metazoa	0
OG0001385	43	6	Bilateria	15	Spur,Vertebrata,Ecdysozoa,Lgig,A,Paus	Skow
OG0001386	43	22	Metazoa	0
OG0001387	43	22	Metazoa	0
OG0001388	43	21	Metazoa	1	Spur
OG0001389	43	19	Metazoa	3	Hmia,Hsap,Smed
OG0001390	43	19	Metazoa	3	Ofus,Dgyr,Lluy
OG0001391	43	21	Metazoa	1	Smar
OG0001392	43	20	Metazoa	2	Hmia,Dgyr
OG0001393	43	20	Metazoa	2	Hmia,Tcas
OG0001394	43	22	Metazoa	0
OG0001395	43	22	Metazoa	0
OG0001396	43	22	Metazoa	0
OG0001397	43	21	Metazoa	1	Smed
OG0001398	43	22	Metazoa	0
OG0001399	43	9	Metazoa	13	Hmia,Skow,Hsap,Smar,Myes,Smed,Ofus,Dgyr,Lluy,Clitellata,Lophophorata	Nvec
OG0001400	43	21	Metazoa	1	Tcas
OG0001401	43	18	Metazoa	4	Hmia,Ecdysozoa,Smed
OG0001402	43	21	Metazoa	1	Smar
OG0001403	43	22	Metazoa	0
OG0001404	43	22	Metazoa	0
OG0001405	43	22	Metazoa	0
OG0001406	43	22	Metazoa	0
OG0001407	43	20	Metazoa	2	Smar,Ofus
OG0001408	43	22	Metazoa	0
OG0001409	43	19	Metazoa	3	Cgig,Smed,Dgyr
OG0001410	43	22	Metazoa	0
OG0001411	43	22	Metazoa	0
OG0001412	43	5	Nephrozoa	15	Vertebrata,Ecdysozoa,Mollusca,Vermizoa,Ofus,Dgyr,Lluy,Ctel,Eand,Paus	Skow
OG0001413	43	22	Metazoa	0
OG0001414	43	22	Metazoa	0
OG0001415	43	22	Metazoa	0
OG0001416	43	12	Lophotrochozoa	1	Ofus
OG0001417	43	17	Metazoa	5	Hmia,Blan,Smar,Smed,Dgyr
OG0001418	43	21	Metazoa	1	Blan
OG0001419	43	11	Nephrozoa	9	Chordata,Smed,B
OG0001420	43	2	D	1	Hrob	Ctel
OG0001421	43	4	Nephrozoa	16	Spur,Chordata,Ecdysozoa,Mollusca,Smed,Dgyr,Lluy,Ctel,Hrob,Lophophorata	Skow
OG0001422	43	1	Hmia	0		Hmia
OG0001423	43	1	Hmia	0		Hmia
OG0001424	43	1	Lgig	0		Lgig
OG0001425	43	3	Metazoa	19	Hmia,Deuterostomia,Ecdysozoa,Lgig,Cgig,A,Lana	Nvec
OG0001426	43	2	Metazoa	20	Hmia,Spur,Chordata,Protostomia	Nvec
OG0001427	43	1	Smed	0		Smed
OG0001428	42	17	Metazoa	5	Hmia,Spur,Vertebrata,Smed
OG0001429	42	21	Metazoa	1	Smed
OG0001430	42	21	Bilateria	0
OG0001431	42	21	Bilateria	0
OG0001432	42	17	Nephrozoa	3	Vermizoa,Hrob
OG0001433	42	20	Metazoa	2	Vertebrata
OG0001434	42	19	Metazoa	3	Smed,Dgyr,Hrob
OG0001435	42	21	Metazoa	1	Lluy
OG0001436	42	22	Metazoa	0
OG0001437	42	21	Bilateria	0
OG0001438	42	22	Metazoa	0
OG0001439	42	22	Metazoa	0
OG0001440	42	19	Bilateria	2	Smar,Smed
OG0001441	42	21	Metazoa	1	Hmia
OG0001442	42	22	Metazoa	0
OG0001443	42	6	Metazoa	16	Hmia,Spur,Vertebrata,Ecdysozoa,Lgig,Cgig,Vermizoa,B,Paus	Blan
OG0001444	42	21	Metazoa	1	Smar
OG0001445	42	21	Metazoa	1	Tcas
OG0001446	42	20	Metazoa	2	Hmia,Tcas
OG0001447	42	19	Nephrozoa	1	Smed
OG0001448	42	22	Metazoa	0
OG0001449	42	20	Metazoa	2	Smar,Hrob
OG0001450	42	22	Metazoa	0
OG0001451	42	7	Metazoa	15	Skow,Vertebrata,Ecdysozoa,Lgig,Cgig,Smed,Ofus,Dgyr,D,Lophophorata
OG0001452	42	13	Metazoa	9	Hmia,Skow,Ecdysozoa,Smed,Dgyr,D
OG0001453	42	21	Metazoa	1	Dgyr
OG0001454	42	22	Metazoa	0
OG0001455	42	20	Metazoa	2	Vermizoa
OG0001456	42	21	Metazoa	1	Lluy
OG0001457	42	21	Metazoa	1	Spur
OG0001458	42	22	Metazoa	0
OG0001459	42	19	Metazoa	3	Hmia,Smar,Paus
OG0001460	42	21	Metazoa	1	Smar
OG0001461	42	14	Metazoa	8	Hmia,Tcas,Bivalvia,C
OG0001462	42	20	Metazoa	2	Tcas,Smed
OG0001463	42	21	Metazoa	1	Spur
OG0001464	42	22	Metazoa	0
OG0001465	42	22	Metazoa	0
OG0001466	42	22	Metazoa	0
OG0001467	42	22	Metazoa	0
OG0001468	42	19	Metazoa	3	Locu,Tcas,Smed
OG0001469	42	19	Bilateria	2	Ambulacraria
OG0001470	42	21	Metazoa	1	Hrob
OG0001471	42	17	Metazoa	5	Hmia,Smed,Clitellata,Paus
OG0001472	42	22	Metazoa	0
OG0001473	42	20	Metazoa	2	Smed,Ofus
OG0001474	42	7	Metazoa	15	Hmia,Ambulacraria,Vertebrata,Ecdysozoa,Lgig,Vermizoa,Ofus,Dgyr,D
OG0001475	42	22	Metazoa	0
OG0001476	42	22	Metazoa	0
OG0001477	42	22	Metazoa	0
OG0001478	42	22	Metazoa	0
OG0001479	42	18	Metazoa	4	Hsap,Ecdysozoa,Hrob
OG0001480	42	22	Metazoa	0
OG0001481	42	22	Metazoa	0
OG0001482	42	22	Metazoa	0
OG0001483	42	21	Metazoa	1	Smar
OG0001484	42	22	Metazoa	0
OG0001485	42	4	Nephrozoa	16	Ambulacraria,Ecdysozoa,Bivalvia,E	Locu
OG0001486	42	21	Metazoa	1	Spur
OG0001487	42	19	Metazoa	3	Hmia,Smar,Smed
OG0001488	42	21	Bilateria	0
OG0001489	42	21	Metazoa	1	Hrob
OG0001490	42	22	Metazoa	0
OG0001491	42	22	Metazoa	0
OG0001492	42	21	Metazoa	1	Hmia
OG0001493	42	20	Metazoa	2	Spur,Blan
OG0001494	42	8	Lophotrochozoa	5	Lgig,Vermizoa,Lophophorata
OG0001495	42	21	Metazoa	1	Blan
OG0001496	42	15	Nephrozoa	5	Chordata,Ecdysozoa
OG0001497	42	21	Metazoa	1	Blan
OG0001498	42	1	Ctel	0		Ctel
OG0001499	42	7	E	3	Vermizoa,Ofus
OG0001500	42	3	D	0		Eand
OG0001501	42	1	Dgyr	0		Dgyr
OG0001502	42	1	Hmia	0		Hmia
OG0001503	42	2	Bilateria	19	Deuterostomia,Ecdysozoa,Bivalvia,E	Lgig
OG0001504	42	6	Metazoa	16	Hmia,Spur,Chordata,Ecdysozoa,Mollusca,Smed,Ofus,Dgyr,D	Ngen
OG0001505	42	1	Ngen	0		Ngen
OG0001506	42	1	Ofus	0		Ofus
OG0001507	41	22	Metazoa	0
OG0001508	41	12	Metazoa	10	Hmia,Ambulacraria,Vertebrata,Ecdysozoa,Vermizoa,Paus
OG0001509	41	14	Bilateria	7	Tcas,Smed,Dgyr,Lluy,Hrob,Lophophorata
OG0001510	41	5	Metazoa	17	Hmia,Spur,Vertebrata,Ecdysozoa,Mollusca,Smed,B,Lophophorata	Blan
OG0001511	41	21	Metazoa	1	Smar
OG0001512	41	22	Metazoa	0
OG0001513	41	19	Bilateria	2	Tcas,Paus
OG0001514	41	22	Metazoa	0
OG0001515	41	22	Metazoa	0
OG0001516	41	21	Metazoa	1	Smed
OG0001517	41	19	Bilateria	2	Tcas,Cgig
OG0001518	41	15	Metazoa	7	Skow,Vertebrata,Smed,Dgyr,Lluy,Paus
OG0001519	41	22	Metazoa	0
OG0001520	41	21	Metazoa	1	Spur
OG0001521	41	22	Metazoa	0
OG0001522	41	22	Metazoa	0
OG0001523	41	18	Metazoa	4	Hmia,Smed,Clitellata
OG0001524	41	12	Metazoa	10	Hmia,Vertebrata,Ecdysozoa,Lgig,Myes,Smed,Dgyr,Paus
OG0001525	41	17	Metazoa	5	Hmia,Vertebrata,Clitellata
OG0001526	41	22	Metazoa	0
OG0001527	41	22	Metazoa	0
OG0001528	41	20	Metazoa	2	Ctel,Hrob
OG0001529	41	17	Metazoa	5	Hmia,Spur,Locu,Ecdysozoa
OG0001530	41	22	Metazoa	0
OG0001531	41	5	Nephrozoa	15	Ambulacraria,Vertebrata,Mollusca,Smed,Ofus,Dgyr,Lluy,Ctel,Eand,Lophophorata	Smar,Tcas
OG0001532	41	6	Nephrozoa	14	Vertebrata,Ecdysozoa,Mollusca,Smed,B,Paus
OG0001533	41	22	Metazoa	0
OG0001534	41	19	Metazoa	3	Hmia,Smed,Eand
OG0001535	41	22	Metazoa	0
OG0001536	41	22	Metazoa	0
OG0001537	41	22	Metazoa	0
OG0001538	41	22	Metazoa	0
OG0001539	41	21	Bilateria	0
OG0001540	41	22	Metazoa	0
OG0001541	41	22	Metazoa	0
OG0001542	41	22	Metazoa	0
OG0001543	41	20	Bilateria	1	Dgyr
OG0001544	41	20	Metazoa	2	Lgig,Hrob
OG0001545	41	21	Metazoa	1	Skow
OG0001546	41	22	Metazoa	0
OG0001547	41	21	Metazoa	1	Hmia
OG0001548	41	22	Metazoa	0
OG0001549	41	15	Metazoa	7	Hmia,Vertebrata,Ofus,Dgyr,Lluy,Hrob
OG0001550	41	22	Metazoa	0
OG0001551	41	22	Metazoa	0
OG0001552	41	22	Metazoa	0
OG0001553	41	20	Bilateria	1	Smar
OG0001554	41	22	Metazoa	0
OG0001555	41	22	Metazoa	0
OG0001556	41	15	Metazoa	7	Hmia,Vertebrata,Ecdysozoa,Clitellata
OG0001557	41	22	Metazoa	0
OG0001558	41	21	Metazoa	1	Eand
OG0001559	41	22	Metazoa	0
OG0001560	41	19	Metazoa	3	Smar,Smed,Hrob
OG0001561	41	21	Metazoa	1	Smed
OG0001562	41	20	Metazoa	2	Smed,Eand
OG0001563	41	22	Metazoa	0
OG0001564	41	22	Metazoa	0
OG0001565	41	21	Metazoa	1	Dgyr
OG0001566	41	19	Metazoa	3	Hmia,Tcas,Dgyr
OG0001567	41	22	Metazoa	0
OG0001568	41	22	Metazoa	0
OG0001569	41	21	Metazoa	1	Spur
OG0001570	41	22	Metazoa	0
OG0001571	41	21	Metazoa	1	Spur
OG0001572	41	21	Metazoa	1	Cgig
OG0001573	41	22	Metazoa	0
OG0001574	41	21	Metazoa	1	Eand
OG0001575	41	22	Metazoa	0
OG0001576	41	8	Nephrozoa	12	Spur,Chordata,Ecdysozoa,Smed,B
OG0001577	41	21	Metazoa	1	Blan
OG0001578	41	8	Metazoa	14	Hmia,Skow,Chordata,Ecdysozoa,Smed,B,Paus
OG0001579	41	3	Metazoa	19	Hmia,Deuterostomia,Ecdysozoa,Mollusca,Vermizoa,Dgyr,Lluy,Clitellata,Lophophorata	Ctel
OG0001580	41	1	Ctel	0		Ctel
OG0001581	41	2	D	1	Hrob	Eand
OG0001582	41	7	Nephrozoa	13	Chordata,Ecdysozoa,Bivalvia,Smed,Dgyr,Clitellata,Lophophorata	Skow
OG0001583	41	2	Bilateria	19	Deuterostomia,Ecdysozoa,Mollusca,A,Lana	Hmia
OG0001584	41	2	Bilateria	19	Spur,Chordata,Protostomia	Hmia
OG0001585	41	1	Locu	0		Locu
OG0001586	41	3	Nephrozoa	17	Chordata,Ecdysozoa,Mollusca,Ngen,Annelida,Lophophorata	Spur
OG0001587	41	1	Smar	0		Smar
OG0001588	41	1	Smar	0		Smar
OG0001589	41	1	Smed	0		Smed
OG0001590	40	19	Metazoa	3	Ecdysozoa,Cgig
OG0001591	40	15	Bilateria	6	Spur,Ecdysozoa,Lluy,Ctel,Hrob
OG0001592	40	1	Blan	0		Blan
OG0001593	40	1	Blan	0		Blan
OG0001594	40	21	Metazoa	1	Hmia
OG0001595	40	22	Metazoa	0
OG0001596	40	19	Metazoa	3	Smar,Myes,Dgyr
OG0001597	40	19	Metazoa	3	Cgig,Smed,Hrob
OG0001598	40	22	Metazoa	0
OG0001599	40	22	Metazoa	0
OG0001600	40	15	Nephrozoa	5	Spur,Lgig,Ngen,Ctel,Paus
OG0001601	40	21	Metazoa	1	Locu
OG0001602	40	14	Metazoa	8	Hmia,Tcas,Mollusca,Smed,Lluy,Hrob
OG0001603	40	19	Metazoa	3	Hmia,Clitellata
OG0001604	40	18	Nephrozoa	2	Spur,Paus
OG0001605	40	11	Nephrozoa	9	Spur,Tcas,Lgig,Myes,Smed,Lluy,Eand,Lophophorata	Ofus
OG0001606	40	20	Metazoa	2	Smar,Dgyr
OG0001607	40	21	Metazoa	1	Ngen
OG0001608	40	22	Metazoa	0
OG0001609	40	22	Metazoa	0
OG0001610	40	19	Nephrozoa	1	Spur
OG0001611	40	22	Metazoa	0
OG0001612	40	19	Metazoa	3	Hmia,Ecdysozoa
OG0001613	40	20	Metazoa	2	Ecdysozoa
OG0001614	40	21	Metazoa	1	Tcas
OG0001615	40	22	Metazoa	0
OG0001616	40	22	Metazoa	0
OG0001617	40	19	Metazoa	3	Hmia,Vertebrata
OG0001618	40	22	Metazoa	0
OG0001619	40	22	Metazoa	0
OG0001620	40	22	Metazoa	0
OG0001621	40	20	Metazoa	2	Spur,Smed
OG0001622	40	13	Metazoa	9	Hmia,Hsap,Ecdysozoa,Smed,Dgyr,Lluy,Clitellata
OG0001623	40	21	Metazoa	1	Lgig
OG0001624	40	9	Nephrozoa	11	Ambulacraria,Smar,Lgig,Vermizoa,B
OG0001625	40	21	Metazoa	1	Smed	Hsap
OG0001626	40	22	Metazoa	0
OG0001627	40	22	Metazoa	0
OG0001628	40	16	Metazoa	6	Hmia,Skow,Smed,Lluy,Clitellata
OG0001629	40	22	Metazoa	0
OG0001630	40	22	Metazoa	0
OG0001631	40	21	Metazoa	1	Tcas
OG0001632	40	22	Metazoa	0
OG0001633	40	22	Metazoa	0
OG0001634	40	22	Metazoa	0
OG0001635	40	22	Metazoa	0
OG0001636	40	22	Metazoa	0
OG0001637	40	19	Nephrozoa	1	Eand
OG0001638	40	11	Metazoa	11	Hmia,Vertebrata,Tcas,Bivalvia,Smed,Ofus,Dgyr,Hrob,Paus	Ngen
OG0001639	40	21	Metazoa	1	Ctel
OG0001640	40	21	Metazoa	1	Smed
OG0001641	40	21	Metazoa	1	Hrob
OG0001642	40	19	Metazoa	3	Hmia,Smed,Dgyr
OG0001643	40	13	Nephrozoa	7	Ambulacraria,Vertebrata,Ecdysozoa,Lgig
OG0001644	40	18	Metazoa	4	Locu,Tcas,Smed,Hrob
OG0001645	40	22	Metazoa	0
OG0001646	40	22	Metazoa	0
OG0001647	40	11	Nephrozoa	9	Vertebrata,Ecdysozoa,Lgig,Ngen,Dgyr,Ctel,Hrob
OG0001648	40	18	Nephrozoa	2	Smed,Dgyr
OG0001649	40	22	Metazoa	0
OG0001650	40	22	Metazoa	0
OG0001651	40	22	Metazoa	0
OG0001652	40	22	Metazoa	0
OG0001653	40	22	Metazoa	0
OG0001654	40	21	Metazoa	1	Dgyr
OG0001655	40	22	Metazoa	0
OG0001656	40	20	Metazoa	2	Hmia,Locu
OG0001657	40	22	Metazoa	0
OG0001658	40	21	Metazoa	1	Smed
OG0001659	40	6	Nephrozoa	14	Spur,Vertebrata,Tcas,Bivalvia,Vermizoa,Dgyr,D,Lophophorata	Ofus
OG0001660	40	22	Metazoa	0
OG0001661	40	21	Metazoa	1	Spur
OG0001662	40	1	Cgig	0		Cgig
OG0001663	40	21	Metazoa	1	Blan
OG0001664	40	7	Metazoa	15	Hmia,Spur,Chordata,Ecdysozoa,Myes,Smed,Ofus,Dgyr,D,Paus
OG0001665	40	21	Metazoa	1	Blan
OG0001666	40	20	Metazoa	2	Blan,Smar
OG0001667	40	21	Metazoa	1	Blan
OG0001668	40	21	Metazoa	1	Blan
OG0001669	40	7	Bilateria	14	Deuterostomia,Ecdysozoa,Lgig,Myes,Smed,Ofus,Dgyr,Clitellata
OG0001670	40	1	Ctel	0		Ctel
OG0001671	40	5	Nephrozoa	15	Ambulacraria,Blan,Hsap,Ecdysozoa,Mollusca,Ngen,Ofus,Dgyr,Eand,Lophophorata	Ctel
OG0001672	40	2	E	8	Vermizoa,Ofus,Dgyr,Lluy,Clitellata,Paus	Ctel
OG0001673	40	1	Ctel	0		Ctel
OG0001674	40	12	Lophotrochozoa	1	Cgig
OG0001675	40	2	Annelida	4	C	Ofus
OG0001676	40	1	Eand	0		Eand
OG0001677	40	1	Hrob	0		Hrob
OG0001678	40	3	Nephrozoa	17	Ambulacraria,Blan,Ecdysozoa,Bivalvia,E	Hsap,Locu
OG0001679	40	3	Nephrozoa	17	Skow,Chordata,Ecdysozoa,Mollusca,Vermizoa,B,Paus	Ofus
OG0001680	40	2	Nephrozoa	18	Skow,Chordata,Ecdysozoa,Mollusca,Vermizoa,Ofus,Dgyr,D,Lophophorata	Lluy
OG0001681	40	1	Smed	0		Smed
OG0001682	39	22	Metazoa	0
OG0001683	39	1	Blan	0		Blan
OG0001684	39	21	Metazoa	1	Tcas
OG0001685	39	10	Metazoa	12	Hmia,Hsap,Ecdysozoa,Cgig,Smed,Ofus,Dgyr,Lluy,Ctel,Hrob,Paus
OG0001686	39	21	Metazoa	1	Skow
OG0001687	39	22	Metazoa	0
OG0001688	39	22	Metazoa	0
OG0001689	39	22	Metazoa	0
OG0001690	39	7	Metazoa	15	Hmia,Spur,Vertebrata,Ecdysozoa,Lgig,Vermizoa,Ofus,Dgyr,Lluy,Ctel,Hrob,Paus	Eand
OG0001691	39	21	Metazoa	1	Hrob
OG0001692	39	22	Metazoa	0
OG0001693	39	19	Bilateria	2	Lgig,Smed	Tcas
OG0001694	39	22	Metazoa	0
OG0001695	39	18	Metazoa	4	Hmia,Smar,Smed,Dgyr
OG0001696	39	22	Metazoa	0
OG0001697	39	22	Metazoa	0
OG0001698	39	22	Metazoa	0
OG0001699	39	22	Metazoa	0
OG0001700	39	21	Metazoa	1	Hmia
OG0001701	39	14	Nephrozoa	6	Ambulacraria,Vertebrata,Smed,Dgyr
OG0001702	39	21	Metazoa	1	Smar
OG0001703	39	21	Metazoa	1	Spur
OG0001704	39	15	Metazoa	7	Hmia,Ecdysozoa,Cgig,Smed,Dgyr,Lluy
OG0001705	39	19	Metazoa	3	Spur,Locu,Smed
OG0001706	39	20	Bilateria	1	Lgig
OG0001707	39	20	Metazoa	2	Ofus,Dgyr
OG0001708	39	19	Metazoa	3	Spur,Ecdysozoa
OG0001709	39	22	Metazoa	0
OG0001710	39	21	Metazoa	1	Spur
OG0001711	39	21	Metazoa	1	Tcas
OG0001712	39	22	Metazoa	0
OG0001713	39	22	Metazoa	0
OG0001714	39	22	Metazoa	0
OG0001715	39	22	Metazoa	0
OG0001716	39	21	Metazoa	1	Hrob
OG0001717	39	20	Metazoa	2	Hmia,Smed
OG0001718	39	21	Metazoa	1	Spur
OG0001719	39	21	Metazoa	1	Spur
OG0001720	39	22	Metazoa	0
OG0001721	39	22	Metazoa	0
OG0001722	39	21	Metazoa	1	Myes
OG0001723	39	20	Metazoa	2	Spur,Dgyr	Smar
OG0001724	39	21	Metazoa	1	Spur
OG0001725	39	20	Bilateria	1	Dgyr
OG0001726	39	22	Metazoa	0
OG0001727	39	10	Metazoa	12	Spur,Locu,Smar,Mollusca,Smed,Ofus,Dgyr,Lluy,Ctel,Hrob	Ngen
OG0001728	39	17	Bilateria	4	Lgig,Smed,Dgyr,Hrob
OG0001729	39	22	Metazoa	0
OG0001730	39	22	Metazoa	0
OG0001731	39	22	Metazoa	0
OG0001732	39	22	Metazoa	0
OG0001733	39	20	Metazoa	2	Hmia,Ctel
OG0001734	39	22	Metazoa	0
OG0001735	39	19	Metazoa	3	Hmia,Smed,Hrob
OG0001736	39	20	Metazoa	2	Spur,Ctel
OG0001737	39	22	Metazoa	0
OG0001738	39	19	Metazoa	3	Spur,Cgig,Eand
OG0001739	39	22	Metazoa	0
OG0001740	39	20	Metazoa	2	Ecdysozoa
OG0001741	39	21	Metazoa	1	Smed
OG0001742	39	22	Metazoa	0
OG0001743	39	22	Metazoa	0
OG0001744	39	20	Metazoa	2	Lgig,Ngen
OG0001745	39	21	Bilateria	0
OG0001746	39	21	Metazoa	1	Tcas
OG0001747	39	21	Metazoa	1	Hmia
OG0001748	39	20	Metazoa	2	Locu,Smed
OG0001749	39	22	Metazoa	0
OG0001750	39	22	Metazoa	0
OG0001751	39	20	Metazoa	2	Tcas,Dgyr
OG0001752	39	22	Metazoa	0
OG0001753	39	22	Metazoa	0
OG0001754	39	22	Metazoa	0
OG0001755	39	14	Nephrozoa	6	Ecdysozoa,Smed,Dgyr,Lluy,Hrob
OG0001756	39	18	Bilateria	3	Smed,Dgyr,Eand
OG0001757	39	22	Metazoa	0
OG0001758	39	10	Lophotrochozoa	3	Vermizoa,Hrob
OG0001759	39	3	Lophotrochozoa	10	Myes,Smed,Annelida,Lophophorata	Ngen
OG0001760	39	20	Metazoa	2	Blan,Lana
OG0001761	39	21	Metazoa	1	Blan
OG0001762	39	15	Metazoa	7	Hmia,Deuterostomia,Smar
OG0001763	39	8	Bilateria	13	Deuterostomia,Ecdysozoa,Mollusca,Vermizoa,Hrob
OG0001764	39	8	Nephrozoa	12	Skow,Chordata,Ecdysozoa,Cgig,Vermizoa,Dgyr,Lophophorata
OG0001765	39	1	Eand	0		Eand
OG0001766	39	2	Clitellata	0		Hrob
OG0001767	39	1	Hrob	0		Hrob
OG0001768	39	1	Lluy	0		Lluy
OG0001769	39	2	Protostomia	13	Smar,Mollusca,Ngen,Annelida,Lophophorata	Tcas
OG0001770	38	21	Metazoa	1	Hmia
OG0001771	38	19	Nephrozoa	1	Dgyr
OG0001772	38	22	Metazoa	0
OG0001773	38	20	Metazoa	2	Hmia,Dgyr
OG0001774	38	19	Metazoa	3	Hmia,Skow,Smar
OG0001775	38	15	Nephrozoa	5	Spur,Vertebrata,Smed,Dgyr
OG0001776	38	1	Blan	0		Blan
OG0001777	38	19	Metazoa	3	Hmia,Dgyr,Eand
OG0001778	38	22	Metazoa	0
OG0001779	38	19	Metazoa	3	Smed,Ctel,Hrob
OG0001780	38	19	Metazoa	3	Hmia,Smar,Dgyr
OG0001781	38	6	Metazoa	16	Hmia,Ambulacraria,Vertebrata,Ecdysozoa,Cgig,Smed,B,Lophophorata	Blan
OG0001782	38	18	Metazoa	4	Smed,Ofus,Clitellata
OG0001783	38	22	Metazoa	0
OG0001784	38	17	Nephrozoa	3	Tcas,Smed,Paus
OG0001785	38	19	Metazoa	3	Cgig,Smed,Hrob
OG0001786	38	20	Metazoa	2	Tcas,Hrob
OG0001787	38	19	Bilateria	2	Locu,Tcas
OG0001788	38	15	Bilateria	6	Spur,Vertebrata,Smed,Lophophorata
OG0001789	38	10	Nephrozoa	10	Ambulacraria,Hsap,Ecdysozoa,Bivalvia,Ngen,Dgyr,Paus
OG0001790	38	4	Nephrozoa	16	Ambulacraria,Vertebrata,Smar,Mollusca,Smed,Ofus,Dgyr,Lluy,Clitellata,Lophophorata	Ctel
OG0001791	38	22	Metazoa	0
OG0001792	38	21	Bilateria	0
OG0001793	38	17	Metazoa	5	Spur,Cgig,Smed,Ofus,Dgyr
OG0001794	38	20	Metazoa	2	Hmia,Skow
OG0001795	38	22	Metazoa	0
OG0001796	38	21	Bilateria	0
OG0001797	38	16	Nephrozoa	4	Ecdysozoa,Smed,Hrob
OG0001798	38	22	Metazoa	0
OG0001799	38	21	Metazoa	1	Smar
OG0001800	38	22	Metazoa	0
OG0001801	38	21	Metazoa	1	Spur
OG0001802	38	21	Metazoa	1	Paus
OG0001803	38	18	Nephrozoa	2	Ecdysozoa
OG0001804	38	22	Metazoa	0
OG0001805	38	21	Metazoa	1	Smed
OG0001806	38	21	Metazoa	1	Spur
OG0001807	38	16	Nephrozoa	4	Ecdysozoa,Dgyr,Lluy
OG0001808	38	22	Metazoa	0
OG0001809	38	20	Metazoa	2	Ecdysozoa
OG0001810	38	20	Metazoa	2	Smar,Hrob
OG0001811	38	22	Metazoa	0
OG0001812	38	19	Bilateria	2	Vermizoa
OG0001813	38	14	Metazoa	8	Hmia,Spur,Vertebrata,Lgig,Smed,Dgyr,Hrob
OG0001814	38	22	Metazoa	0
OG0001815	38	22	Metazoa	0
OG0001816	38	22	Metazoa	0
OG0001817	38	22	Metazoa	0
OG0001818	38	22	Metazoa	0
OG0001819	38	22	Metazoa	0
OG0001820	38	21	Metazoa	1	Dgyr
OG0001821	38	21	Metazoa	1	Tcas
OG0001822	38	4	Nephrozoa	16	Ambulacraria,Vertebrata,Ecdysozoa,Mollusca,Vermizoa,Ofus,Dgyr,Lluy,Lophophorata	Eand
OG0001823	38	9	Bilateria	12	Skow,Vertebrata,Mollusca,Smed,Dgyr,Lluy,Ctel,Lophophorata
OG0001824	38	20	Metazoa	2	Vermizoa
OG0001825	38	20	Metazoa	2	Skow,Lgig
OG0001826	38	22	Metazoa	0
OG0001827	38	21	Metazoa	1	Spur
OG0001828	38	22	Metazoa	0
OG0001829	38	22	Metazoa	0
OG0001830	38	22	Metazoa	0
OG0001831	38	20	Metazoa	2	Clitellata
OG0001832	38	22	Metazoa	0
OG0001833	38	22	Metazoa	0
OG0001834	38	22	Metazoa	0
OG0001835	38	22	Metazoa	0
OG0001836	38	22	Metazoa	0
OG0001837	38	21	Bilateria	0
OG0001838	38	21	Metazoa	1	Smar
OG0001839	38	8	Lophotrochozoa	5	Smed,Dgyr,Lluy,Ctel,Hrob
OG0001840	38	2	Bivalvia	0		Cgig,Myes
OG0001841	38	19	Metazoa	3	Blan,Lgig,Ctel
OG0001842	38	10	Nephrozoa	10	Chordata,Tcas,Lgig,Smed,Ofus,Lluy,Clitellata	Skow
OG0001843	38	2	Lophotrochozoa	11	Lgig,Myes,Smed,Annelida,Lophophorata	Ngen
OG0001844	38	21	Metazoa	1	Blan
OG0001845	38	10	Lophotrochozoa	3	Smed,Dgyr,Lluy
OG0001846	38	3	A	5	Smed,Ofus,Dgyr,Lluy,Hrob	Ngen
OG0001847	38	1	Ctel	0		Ctel
OG0001848	38	11	Metazoa	11	Hmia,Chordata,Tcas,Bivalvia,Smed,Dgyr,Clitellata
OG0001849	38	1	Myes	0		Myes
OG0001850	38	1	Ngen	0		Ngen
OG0001851	38	1	Ngen	0		Ngen
OG0001852	38	1	Ofus	0		Ofus
OG0001853	38	1	Smed	0		Smed
OG0001854	37	20	Metazoa	2	Spur,Smed
OG0001855	37	20	Metazoa	2	Smed,Hrob
OG0001856	37	3	Deuterostomia	2	Vertebrata	Blan
OG0001857	37	19	Metazoa	3	Cgig,Smed,Dgyr
OG0001858	37	20	Metazoa	2	Hmia,Smed
OG0001859	37	21	Metazoa	1	Dgyr
OG0001860	37	17	Metazoa	5	Vertebrata,Ecdysozoa,Hrob
OG0001861	37	13	Metazoa	9	Hmia,Vertebrata,Ecdysozoa,Smed,Dgyr,Hrob,Lana
OG0001862	37	22	Metazoa	0
OG0001863	37	22	Metazoa	0
OG0001864	37	1	Blan	0		Blan
OG0001865	37	20	Metazoa	2	Lluy,Ctel
OG0001866	37	22	Metazoa	0
OG0001867	37	22	Metazoa	0
OG0001868	37	22	Metazoa	0
OG0001869	37	14	Metazoa	8	Hsap,Ecdysozoa,Myes,Ngen,Dgyr,Eand,Lana
OG0001870	37	21	Metazoa	1	Spur
OG0001871	37	22	Metazoa	0
OG0001872	37	21	Metazoa	1	Cgig
OG0001873	37	21	Metazoa	1	Hmia
OG0001874	37	10	Nephrozoa	10	Ambulacraria,Vertebrata,Ecdysozoa,Smed,Lluy,Hrob,Lana
OG0001875	37	1	Blan	0		Blan
OG0001876	37	22	Metazoa	0
OG0001877	37	21	Metazoa	1	Hmia
OG0001878	37	21	Metazoa	1	Dgyr
OG0001879	37	21	Metazoa	1	Smar
OG0001880	37	21	Bilateria	0
OG0001881	37	17	Nephrozoa	3	Ecdysozoa,Smed
OG0001882	37	20	Metazoa	2	Hmia,Dgyr
OG0001883	37	10	Metazoa	12	Hmia,Ambulacraria,Vertebrata,Tcas,Smed,B
OG0001884	37	20	Metazoa	2	Smed,Dgyr
OG0001885	37	22	Metazoa	0
OG0001886	37	22	Metazoa	0
OG0001887	37	21	Metazoa	1	Smar
OG0001888	37	20	Metazoa	2	Hmia,Tcas
OG0001889	37	15	Nephrozoa	5	Tcas,Mollusca,Dgyr
OG0001890	37	22	Metazoa	0
OG0001891	37	22	Metazoa	0
OG0001892	37	20	Bilateria	1	Spur
OG0001893	37	21	Metazoa	1	Dgyr
OG0001894	37	21	Metazoa	1	Hrob
OG0001895	37	22	Metazoa	0
OG0001896	37	16	Nephrozoa	4	Ecdysozoa,Clitellata
OG0001897	37	21	Metazoa	1	Cgig
OG0001898	37	18	Nephrozoa	2	Spur,Smed
OG0001899	37	22	Metazoa	0
OG0001900	37	22	Metazoa	0
OG0001901	37	22	Metazoa	0
OG0001902	37	17	Metazoa	5	Vertebrata,Tcas,Ctel,Hrob
OG0001903	37	18	Metazoa	4	Hsap,Ecdysozoa,Hrob
OG0001904	37	16	Nephrozoa	4	Skow,Vertebrata,Tcas
OG0001905	37	22	Metazoa	0
OG0001906	37	22	Metazoa	0
OG0001907	37	20	Bilateria	1	Lgig
OG0001908	37	22	Metazoa	0
OG0001909	37	19	Metazoa	3	Ecdysozoa,Hrob
OG0001910	37	21	Metazoa	1	Eand
OG0001911	37	20	Metazoa	2	Vertebrata
OG0001912	37	12	Metazoa	10	Hmia,Ambulacraria,Vertebrata,Ecdysozoa,Smed,Clitellata
OG0001913	37	16	Metazoa	6	Spur,Hsap,Tcas,Dgyr,Clitellata
OG0001914	37	20	Metazoa	2	Spur,Ofus
OG0001915	37	22	Metazoa	0
OG0001916	37	22	Metazoa	0
OG0001917	37	21	Bilateria	0
OG0001918	37	19	Metazoa	3	Hmia,Spur,Paus
OG0001919	37	21	Metazoa	1	Hmia
OG0001920	37	22	Metazoa	0
OG0001921	37	22	Metazoa	0
OG0001922	37	22	Metazoa	0
OG0001923	37	22	Metazoa	0
OG0001924	37	19	Metazoa	3	Smar,Cgig,Dgyr
OG0001925	37	22	Metazoa	0
OG0001926	37	19	Metazoa	3	Hmia,Tcas,Paus
OG0001927	37	22	Metazoa	0
OG0001928	37	22	Metazoa	0
OG0001929	37	19	Metazoa	3	Ecdysozoa,Hrob
OG0001930	37	18	Metazoa	4	Hmia,Tcas,Smed,Hrob
OG0001931	37	22	Metazoa	0
OG0001932	37	16	Nephrozoa	4	Ambulacraria,Tcas,Smed
OG0001933	37	22	Metazoa	0
OG0001934	37	20	Metazoa	2	Ecdysozoa
OG0001935	37	21	Metazoa	1	Tcas
OG0001936	37	21	Metazoa	1	Hmia
OG0001937	37	20	Metazoa	2	Smar,Ctel
OG0001938	37	22	Metazoa	0
OG0001939	37	22	Metazoa	0
OG0001940	37	20	Metazoa	2	Cgig,Dgyr
OG0001941	37	22	Metazoa	0
OG0001942	37	22	Metazoa	0
OG0001943	37	10	Metazoa	12	Hmia,Spur,Vertebrata,Ecdysozoa,Myes,Smed,Ofus,Dgyr,Clitellata
OG0001944	37	21	Bilateria	0
OG0001945	37	20	Metazoa	2	Hsap,Hrob
OG0001946	37	22	Metazoa	0
OG0001947	37	20	Metazoa	2	Hmia,Cgig
OG0001948	37	21	Metazoa	1	Tcas
OG0001949	37	3	Lophotrochozoa	10	Lgig,A,Paus	Cgig,Myes
OG0001950	37	14	Metazoa	8	Hmia,Deuterostomia,Lgig,Hrob
OG0001951	37	7	Nephrozoa	13	Skow,Chordata,Ecdysozoa,Lgig,Myes,Vermizoa,Dgyr,Hrob,Paus
OG0001952	37	19	Bilateria	2	Spur,Blan
OG0001953	37	15	Metazoa	7	Spur,Chordata,Smar,Smed,Lana
OG0001954	37	16	Metazoa	6	Hmia,Blan,Hsap,Lgig,Smed,Dgyr
OG0001955	37	8	Bilateria	13	Deuterostomia,Ecdysozoa,Bivalvia,Vermizoa,Lophophorata
OG0001956	37	7	Metazoa	15	Hmia,Chordata,Ecdysozoa,Bivalvia,Vermizoa,Ofus,Dgyr,Eand,Lophophorata
OG0001957	37	1	Ctel	0		Ctel
OG0001958	37	4	A	4	Ngen,Ofus,Dgyr,Hrob	Lluy
OG0001959	37	10	E	0
OG0001960	37	3	Nephrozoa	17	Skow,Chordata,Ecdysozoa,Mollusca,Vermizoa,Ofus,Lluy,Ctel,Hrob,Lophophorata	Eand
OG0001961	37	7	Nephrozoa	13	Spur,Chordata,Cgig,Smed,Ofus,Dgyr,Lluy,Ctel,Hrob,Lophophorata	Ngen
OG0001962	37	6	Nephrozoa	14	Skow,Chordata,Ecdysozoa,Lgig,Cgig,Smed,B	Ngen
OG0001963	37	1	Ofus	0		Ofus
OG0001964	37	1	Ofus	0		Ofus
OG0001965	37	1	Smar	0		Smar
OG0001966	36	21	Metazoa	1	Hmia
OG0001967	36	21	Metazoa	1	Myes
OG0001968	36	21	Metazoa	1	Spur
OG0001969	36	20	Metazoa	2	Myes,Lluy
OG0001970	36	20	Metazoa	2	Tcas,Smed
OG0001971	36	17	Metazoa	5	Hmia,Ecdysozoa,Dgyr,Hrob
OG0001972	36	22	Metazoa	0
OG0001973	36	20	Metazoa	2	Spur,Cgig
OG0001974	36	19	Metazoa	3	Hsap,Myes,Smed
OG0001975	36	3	Nephrozoa	17	Spur,Vertebrata,Ecdysozoa,Mollusca,Vermizoa,B,Lophophorata	Blan
OG0001976	36	22	Metazoa	0
OG0001977	36	22	Metazoa	0
OG0001978	36	22	Metazoa	0
OG0001979	36	14	Metazoa	8	Hmia,Vertebrata,Ecdysozoa,Smed,Lluy,Hrob
OG0001980	36	20	Metazoa	2	Smar,Hrob
OG0001981	36	17	Metazoa	5	Hmia,Hsap,Ecdysozoa,Smed
OG0001982	36	19	Nephrozoa	1	Smed
OG0001983	36	22	Metazoa	0
OG0001984	36	22	Metazoa	0
OG0001985	36	14	Metazoa	8	Hmia,Vertebrata,Tcas,Smed,Lluy,Clitellata
OG0001986	36	21	Metazoa	1	Smar
OG0001987	36	19	Nephrozoa	1	Locu
OG0001988	36	21	Metazoa	1	Dgyr
OG0001989	36	19	Metazoa	3	Hmia,Hsap,Smar
OG0001990	36	14	Metazoa	8	Hmia,Vertebrata,Ecdysozoa,Smed,Clitellata
OG0001991	36	21	Metazoa	1	Tcas
OG0001992	36	22	Metazoa	0
OG0001993	36	21	Metazoa	1	Smed
OG0001994	36	22	Metazoa	0
OG0001995	36	22	Metazoa	0
OG0001996	36	8	Metazoa	14	Hmia,Spur,Vertebrata,Ecdysozoa,Myes,Smed,Annelida	Lgig
OG0001997	36	22	Metazoa	0
OG0001998	36	8	Nephrozoa	12	Ambulacraria,Vertebrata,Ecdysozoa,Vermizoa,Dgyr,Clitellata,Paus
[truncated: 45,686 more rows]

## Sheet: Table5
Orthogroup	PANTHER annotation	Number of species	Number of genes	Species with gains	Gains size	p-values
OG0000000	ZINC FINGER PROTEIN	22	1869	Blan,Hsap,Lgig,Ofus,Skow,Tcas	364,248,152,118,155,80	2.82e-32,9.33e-38,2.93e-12,4.43e-03,2.38e-05,6.54e-06
OG0000003	FIBRINOGEN/TENASCIN/ANGIOPOEITIN	22	976	Blan,Cgig,Ctel,Hrob,Lluy,Nvec,Ofus	116,139,109,84,90,64,69	6.13e-06,2.20e-14,6.13e-06,1.86e-08,3.64e-03,1.72e-03,1.58e-02
OG0000007	NOTCH-RELATED	22	818	Blan,Ctel,Lluy,Nvec,Ofus,Spur	81,78,85,121,69,83	8.04e-03,5.96e-03,2.38e-03,8.86e-16,3.94e-03,1.23e-08
OG0000018	TRIPARTITE MOTIF-CONTAINING PROTEIN 45	22	493	Blan,Lgig,Nvec,Ofus	63,53,56,46	6.49e-03,9.12e-05,2.86e-05,3.76e-02
OG0000019	COMPLEMENT FACTOR PROPERDIN-RELATED	22	478	Cgig,Nvec,Ofus	53,76,52	1.09e-03,1.28e-10,1.63e-03
OG0000024	EG:EG0003.4 PROTEIN-RELATED	22	380	Blan,Ofus,Spur	62,39,41	3.99e-04,3.16e-02,3.73e-04
OG0000027	MULTICOPPER OXIDASE-RELATED	22	368	Nvec,Ofus,Spur	164,32,32	5.20e-41,7.40e-03,2.56e-04
OG0000032	GALACTOSE-3-O-SULFOTRANSFERASE	22	339	Blan,Ofus,Skow,Spur	85,31,95,23	1.19e-10,1.16e-02,2.78e-14,2.94e-02
OG0000034	CNMAMIDE RECEPTOR	22	335	Ctel,Ofus	69,76	9.41e-06,2.10e-08
OG0000041	ALPHA 1,3 FUCOSYLTRANSFERASE-RELATED	22	308	Ctel,Ofus	43,51	1.24e-02,7.06e-05
OG0000062	KINESIN LIGHT CHAIN	22	257	Blan,Ofus,Paus	164,53,31	2.73e-33,4.69e-11,9.71e-08
OG0000073	CARBOHYDRATE SULFOTRANSFERASE	22	237	Ofus,Skow,Spur	33,48,31	1.19e-02,1.61e-04,1.46e-03
OG0000145	LEUKOCYTE ELASTASE INHIBITOR	22	161	Ofus	25	0.0433
OG0000149	GALACTOSIDE 2-L-FUCOSYLTRANSFERASE	22	159	Ctel,Ofus	41,25	1.80e-05,4.80e-03
OG0000152	HYPOTHETICAL LOC556402-RELATED	22	156	Cgig,Lgig,Locu,Myes,Ofus	18,21,50,26,14	6.48e-03,1.34e-04,1.07e-14,4.61e-05,3.17e-02
OG0000196	PROTEIN CBG14225	22	141	Ofus	38	5.01e-05
OG0000210	TRANSFERASE, PUTATIVE-RELATED	22	134	Lluy,Ofus	24,21	9.55e-03,7.40e-03
OG0000304	MELATONIN RECEPTOR TYPE 1A-LIKE ISOFORM X2	22	109	Ofus	25	0.0158
OG0000307	WSCD FAMILY MEMBER CG9164	22	109	Ofus,Skow	21,32	2.75e-02,5.79e-04
OG0000330	ALPHA-TOCOPHEROL TRANSFER PROTEIN-RELATED	22	104	Dgyr,Eand,Ofus,Tcas	13,21,25,10	1.62e-03,3.20e-03,1.18e-04,1.03e-02
OG0000401	ZINC FINGER PROTEIN	22	90	Ctel,Ofus	19,39	4.78e-02,8.48e-07
OG0000492	SUBFAMILY NOT NAMED	22	79	Ofus	22	0.00059
OG0000565	CYCLASE-LIKE PROTEIN 2	22	73	Ofus	22	0.0046
OG0000892	.	22	56	Ofus	56	1.44e-11
OG0001002	CELL FATE DETERMINING PROTEIN MAB21-RELATED	22	52	Ofus	52	5.83e-11
OG0001302	MONOCARBOXYLATE TRANSPORTER	22	45	Ofus	20	0.00163
OG0001306	THIOESTERASE 1/PROTEASE 1/LYSOPHOSPHOLIPASE L1	22	45	Ofus	37	1.83e-07
OG0001358	FAMILY NOT NAMED	22	44	Ofus	25	0.000118
OG0001506	.	22	42	Ofus	42	2.1e-08
OG0001605	ZINC FINGER PROTEIN	22	40	Ofus	19	0.00281
OG0001659	PROTEIN BARK BEETLE	22	40	Ofus	34	9.32e-07
OG0001675	INTER-ALPHA-TRYPSIN INHIBITOR HEAVY CHAIN FAMILY MEMBER	22	40	Ofus	39	9.64e-08
OG0001679	TOLL-LIKE RECEPTOR 13	22	40	Ofus	38	1.35e-07
OG0001852	UNCHARACTERIZED	22	38	Ofus	38	1.35e-07
OG0001963	INACTIVE SERINE PROTEASE 54	22	37	Ofus	37	1.83e-07
OG0001964	TOLL-LIKE RECEPTOR	22	37	Ofus	37	1.83e-07
OG0002097	EG:EG0003.4 PROTEIN-RELATED	22	36	Ofus	36	3.13e-07
OG0002206	UDP-D-XYLOSE:L-FUCOSE ALPHA-1,3-D-XYLOSYLTRANSFERASE-RELATED	22	35	Ofus,Skow	15,16	1.94e-02,1.98e-02
OG0002382	AMILORIDE-SENSITIVE SODIUM CHANNEL-RELATED	22	34	Ofus	31	4.23e-06
OG0002385	E3 UBIQUITIN-PROTEIN LIGASE NHLRC1-RELATED	22	34	Ofus	33	1.62e-06
OG0002533	SUBFAMILY NOT NAMED	22	33	Ofus	32	2.67e-06
OG0002738	BTA1P	22	32	Ofus	32	2.67e-06
OG0003003	CALCIUM UPTAKE PROTEIN 1, MITOCHONDRIAL	22	31	Ofus	31	4.23e-06
OG0003004	ZINC FINGER PROTEIN	22	31	Ofus	31	4.23e-06
OG0003166	.	22	30	Ofus	28	2.49e-05
OG0004036	SUBFAMILY NOT NAMED	22	28	Ofus	28	2.49e-05
OG0004515	METABOTROPIC GABA-B RECEPTOR SUBTYPE 2, ISOFORM C	22	27	Ofus	27	4.26e-05
OG0004516	.	22	27	Ofus	27	4.26e-05
OG0005050	.	22	26	Ofus	20	0.00163
OG0005065	EXTRACELLULAR MATRIX GLYCOPROTEIN RELATED	22	26	Ofus	26	7.06e-05
OG0005695	LIPOPROTEIN-RELATED	22	25	Ofus	16	0.0119
OG0005718	UNCHARACTERIZED	22	25	Ofus	25	0.000118
OG0006189	ADENOSINE RECEPTOR HOMOLOG	22	24	Ofus	23	0.000343
OG0006379	SUBFAMILY NOT NAMED	22	24	Ofus	23	0.000343
OG0006386	UDP-D-XYLOSE:L-FUCOSE ALPHA-1,3-D-XYLOSYLTRANSFERASE-RELATED	22	24	Ofus	24	0.000207
OG0006387	LATROPHILIN RECEPTOR-LIKE PROTEIN A	22	24	Ofus	23	0.000343
OG0006388	DD-GDCA PROTEIN	22	24	Ofus	24	0.000207
OG0006964	EXTRACELLULAR MATRIX GLYCOPROTEIN RELATED	22	23	Ofus	21	0.00102
OG0007017	FAMILY NOT NAMED	22	23	Ofus	15	0.0194
OG0007038	ZINC METALLOPROTEINASE NAS-36	22	23	Ofus	23	0.000343
OG0007521	FAMILY NOT NAMED	22	22	Ofus	17	0.0074
OG0007604	CELL FATE DETERMINING PROTEIN MAB21-RELATED	22	22	Ofus	22	0.00059
OG0007605	COLLAGEN, TYPE VI, ALPHA 4A	22	22	Ofus	22	0.00059
OG0008078	ZINC FINGER PROTEIN	22	21	Ofus	21	0.00102
OG0008079	TRANSPORTER MCH1-RELATED	22	21	Ofus	21	0.00102
OG0008510	.	22	20	Ofus	20	0.00163
OG0008511	COLLAGEN ALPHA-4(VI) CHAIN	22	20	Ofus	20	0.00163
OG0008512	.	22	20	Ofus	20	0.00163
OG0008513	HEPARAN SULFATE 2-O-SULFOTRANSFERASE	22	20	Ofus	20	0.00163
OG0008888	COMPLEMENT COMPONENT-RELATED SUSHI DOMAIN-CONTAINING	22	19	Ofus	18	0.00463
OG0008902	SUBFAMILY NOT NAMED	22	19	Ofus	19	0.00281
OG0008903	RE42927P-RELATED	22	19	Ofus	19	0.00281
OG0008904	KINESIN LIGHT CHAIN	22	19	Ofus	19	0.00281
OG0009090	OLFACTORY RECEPTOR AND ADENOSINE RECEPTOR	22	18	Ofus	16	0.0119
OG0009218	CYTOCHROME P450 1A2-LIKE	22	18	Ofus	17	0.0074
OG0009269	CENTRIOLIN	22	18	Ofus	17	0.0074
OG0009274	SUBFAMILY NOT NAMED	22	18	Ofus	17	0.0074
OG0009280	PUTATIVE (AFU_ORTHOLOGUE AFUA_1G03170)-RELATED	22	18	Ofus	16	0.0119
OG0009284	ELRR (EXTRACELLULAR LEUCINE-RICH REPEAT) ONLY	22	18	Ofus	18	0.00463
OG0009285	AMINE SULFOTRANSFERASE-RELATED	22	18	Ofus	18	0.00463
OG0009286	FIBRINOGEN/TENASCIN/ANGIOPOEITIN	22	18	Ofus	18	0.00463
OG0009627	.	22	17	Ofus	17	0.0074
OG0009628	UNCHARACTERIZED	22	17	Ofus	17	0.0074
OG0009629	PROGRESSIVE ANKYLOSIS PROTEIN HOMOLOG	22	17	Ofus	17	0.0074
OG0009894	STEROID 17-ALPHA-HYDROXYLASE/17,20 LYASE	22	16	Ofus	15	0.0194
OG0009916	L-GULONOLACTONE OXIDASE	22	16	Ofus	15	0.0194
OG0009955	FAMILY NOT NAMED	22	16	Ofus	14	0.0317
OG0009967	FAMILY NOT NAMED	22	16	Ofus	15	0.0194
OG0009980	.	22	16	Ofus	16	0.0119
OG0009981	.	22	16	Ofus	16	0.0119
OG0009982	LATROPHILIN RECEPTOR-LIKE PROTEIN A	22	16	Ofus	16	0.0119
OG0009983	EG:EG0003.4 PROTEIN-RELATED	22	16	Ofus	16	0.0119
OG0009984	PFS, NB-ARC AND TPR DOMAIN PROTEIN (JCVI)	22	16	Ofus	16	0.0119
OG0009985	HYALURONATE LYASE	22	16	Ofus	16	0.0119
OG0009986	GH15296P	22	16	Ofus	16	0.0119
OG0010308	MEMBRANE-BOUND LYTIC MUREIN TRANSGLYCOSYLASE F	22	15	Ofus	14	0.0317
OG0010324	UNCHARACTERIZED	22	15	Ofus	15	0.0194
OG0010325	DD-GDCA PROTEIN	22	15	Ofus	14	0.0317
OG0010326	PLATELET-ACTIVATING FACTOR ACETYLHYDROLASE IB SUBUNIT BETA HOMOLOG	22	15	Ofus	15	0.0194
OG0010327	FIBRINOGEN/TENASCIN/ANGIOPOEITIN	22	15	Ofus	15	0.0194
OG0010328	.	22	15	Ofus	15	0.0194
OG0010700	UNCHARACTERIZED	22	14	Ofus	14	0.0317
OG0010701	GH11818P-RELATED	22	14	Ofus	14	0.0317
OG0010702	TOLL-LIKE RECEPTOR 13	22	14	Ofus	14	0.0317
OG0010703	ANKYRIN REPEAT-CONTAINING PROTEIN DDB_G0279043	22	14	Ofus	14	0.0317
OG0010704	LATROPHILIN RECEPTOR-LIKE PROTEIN A	22	14	Ofus	14	0.0317
OG0010705	.	22	14	Ofus	14	0.0317
OG0010706	STEROID 17-ALPHA-HYDROXYLASE/17,20 LYASE	22	14	Ofus	14	0.0317

## Sheet: Table6
Orthogroup	Annotation
OG0000001	sp|Q9NTG7|SIR3_HUMAN NAD-dependent protein deacetylase sirtuin-3, mitochondrial OS=Homo sapiens OX=9606 GN=SIRT3 PE=1 SV=2
OG0000004	sp|Q99315|YG31B_YEAST Transposon Ty3-G Gag-Pol polyprotein OS=Saccharomyces cerevisiae (strain ATCC 204508 / S288c) OX=559292 GN=TY3B-G PE=1 SV=3
OG0000006	sp|Q95SX7|RTBS_DROME Probable RNA-directed DNA polymerase from transposon BS OS=Drosophila melanogaster OX=7227 GN=RTase PE=2 SV=1
OG0000023	sp|P11369|LORF2_MOUSE LINE-1 retrotransposable element ORF2 protein OS=Mus musculus OX=10090 GN=Pol PE=1 SV=2
OG0000045	sp|B5XCB8|THAP1_SALSA THAP domain-containing protein 1 OS=Salmo salar OX=8030 GN=thap1 PE=2 SV=1
OG0000075	sp|P68432|H31_BOVIN Histone H3.1 OS=Bos taurus OX=9913 PE=1 SV=2
OG0000088	sp|P62803|H4_BOVIN Histone H4 OS=Bos taurus OX=9913 PE=1 SV=2
OG0000090	sp|Q9UDY8|MALT1_HUMAN Mucosa-associated lymphoid tissue lymphoma translocation protein 1 OS=Homo sapiens OX=9606 GN=MALT1 PE=1 SV=1
OG0000091	sp|Q9T0F3|IAN12_ARATH Immune-associated nucleotide-binding protein 12 OS=Arabidopsis thaliana OX=3702 GN=IAN12 PE=2 SV=1
OG0000112	sp|Q0D2A9|KLH25_XENTR Kelch-like protein 25 OS=Xenopus tropicalis OX=8364 GN=klhl25 PE=2 SV=1
OG0000140	sp|O02751|CFDP2_BOVIN Craniofacial development protein 2 OS=Bos taurus OX=9913 GN=CFDP2 PE=1 SV=2
OG0000155	sp|Q9Y4A0|JERKL_HUMAN Jerky protein homolog-like OS=Homo sapiens OX=9606 GN=JRKL PE=2 SV=2
OG0000158	sp|F1RD40|MYCB2_DANRE E3 ubiquitin-protein ligase MYCBP2 OS=Danio rerio OX=7955 GN=mycbp2 PE=2 SV=1
OG0000164	sp|P34257|TC3A_CAEEL Transposable element Tc3 transposase OS=Caenorhabditis elegans OX=6239 GN=tc3a PE=1 SV=1
OG0000178	sp|Q86UV5|UBP48_HUMAN Ubiquitin carboxyl-terminal hydrolase 48 OS=Homo sapiens OX=9606 GN=USP48 PE=1 SV=1
OG0000182	sp|Q7ZYA0|LMBD2_XENLA G-protein coupled receptor-associated protein LMBRD2 OS=Xenopus laevis OX=8355 GN=lmbrd2 PE=2 SV=1
OG0000186	sp|O70247|SC5A6_RAT Sodium-dependent multivitamin transporter OS=Rattus norvegicus OX=10116 GN=Slc5a6 PE=2 SV=1
OG0000188	sp|Q86UP8|GTD2A_HUMAN General transcription factor II-I repeat domain-containing protein 2A OS=Homo sapiens OX=9606 GN=GTF2IRD2 PE=1 SV=3
OG0000192	sp|Q20930|MIG17_CAEEL Metalloprotease mig-17 OS=Caenorhabditis elegans OX=6239 GN=mig-17 PE=1 SV=3
OG0000199	sp|Q9I931|FUCL1_ANGJA Fucolectin-1 OS=Anguilla japonica OX=7937 PE=2 SV=1
OG0000200	sp|Q9CWU2|ZDH13_MOUSE Palmitoyltransferase ZDHHC13 OS=Mus musculus OX=10090 GN=Zdhhc13 PE=1 SV=2
OG0000211	sp|Q7ZV90|PIF1_DANRE ATP-dependent DNA helicase PIF1 OS=Danio rerio OX=7955 GN=pif1 PE=2 SV=1
OG0000237	sp|Q923P0|COKA1_MOUSE Collagen alpha-1(XX) chain OS=Mus musculus OX=10090 GN=Col20a1 PE=2 SV=3
OG0000259	sp|Q9U489|LIN41_CAEEL Protein lin-41 OS=Caenorhabditis elegans OX=6239 GN=lin-41 PE=1 SV=1
OG0000284	sp|Q5SVZ6|ZMYM1_HUMAN Zinc finger MYM-type protein 1 OS=Homo sapiens OX=9606 GN=ZMYM1 PE=1 SV=1
OG0000296	sp|Q923Y7|TAAR4_RAT Trace amine-associated receptor 4 OS=Rattus norvegicus OX=10116 GN=Taar4 PE=3 SV=1
OG0000301
OG0000309	sp|P07511|GLYC_RABIT Serine hydroxymethyltransferase, cytosolic OS=Oryctolagus cuniculus OX=9986 GN=SHMT1 PE=1 SV=2
OG0000313
OG0000315
OG0000317	sp|P14381|YTX2_XENLA Transposon TX1 uncharacterized 149 kDa protein OS=Xenopus laevis OX=8355 PE=4 SV=1
OG0000329	sp|Q94887|NRX4_DROME Neurexin-4 OS=Drosophila melanogaster OX=7227 GN=Nrx-IV PE=1 SV=2
OG0000349	sp|Q640U3|CLMP_XENTR CXADR-like membrane protein OS=Xenopus tropicalis OX=8364 GN=clmp PE=2 SV=1
OG0000384	sp|Q5JUX0|SPIN3_HUMAN Spindlin-3 OS=Homo sapiens OX=9606 GN=SPIN3 PE=1 SV=1
OG0000390	sp|Q5R9R1|EDRF1_PONAB Erythroid differentiation-related factor 1 OS=Pongo abelii OX=9601 GN=EDRF1 PE=2 SV=1
OG0000407	sp|P15328|FOLR1_HUMAN Folate receptor alpha OS=Homo sapiens OX=9606 GN=FOLR1 PE=1 SV=3
OG0000428	sp|Q8TCP9|F200A_HUMAN Protein FAM200A OS=Homo sapiens OX=9606 GN=FAM200A PE=1 SV=1
OG0000432	sp|P63048|RL40_BOVIN Ubiquitin-60S ribosomal protein L40 OS=Bos taurus OX=9913 GN=UBA52 PE=1 SV=2
OG0000438	sp|Q8N8U9|BMPER_HUMAN BMP-binding endothelial regulator protein OS=Homo sapiens OX=9606 GN=BMPER PE=1 SV=3
OG0000447	sp|Q92692|NECT2_HUMAN Nectin-2 OS=Homo sapiens OX=9606 GN=NECTIN2 PE=1 SV=1
OG0000512	sp|Q9I931|FUCL1_ANGJA Fucolectin-1 OS=Anguilla japonica OX=7937 PE=2 SV=1
OG0000520	sp|Q96DM1|PGBD4_HUMAN PiggyBac transposable element-derived protein 4 OS=Homo sapiens OX=9606 GN=PGBD4 PE=2 SV=3
OG0000527	sp|Q09666|AHNK_HUMAN Neuroblast differentiation-associated protein AHNAK OS=Homo sapiens OX=9606 GN=AHNAK PE=1 SV=2
OG0000531	sp|Q99816|TS101_HUMAN Tumor susceptibility gene 101 protein OS=Homo sapiens OX=9606 GN=TSG101 PE=1 SV=2
OG0000541	sp|P51909|APOD_CAVPO Apolipoprotein D OS=Cavia porcellus OX=10141 GN=APOD PE=2 SV=1
OG0000548	sp|Q96MW7|TIGD1_HUMAN Tigger transposable element-derived protein 1 OS=Homo sapiens OX=9606 GN=TIGD1 PE=1 SV=1
OG0000551	sp|Q69ZT9|TBC30_MOUSE TBC1 domain family member 30 OS=Mus musculus OX=10090 GN=Tbc1d30 PE=1 SV=2
OG0000571	sp|Q6R2W3|SCND3_HUMAN SCAN domain-containing protein 3 OS=Homo sapiens OX=9606 GN=ZBED9 PE=2 SV=1
OG0000573	sp|Q54RB7|SHKA_DICDI Dual specificity protein kinase shkA OS=Dictyostelium discoideum OX=44689 GN=shkA PE=2 SV=1
OG0000578	sp|Q9CL21|RECQ_PASMU ATP-dependent DNA helicase RecQ OS=Pasteurella multocida (strain Pm70) OX=272843 GN=recQ PE=3 SV=1
OG0000579	sp|Q7ZYC4|ACBG2_XENLA Long-chain-fatty-acid--CoA ligase ACSBG2 OS=Xenopus laevis OX=8355 GN=acsbg2 PE=2 SV=1
OG0000580	sp|Q9Z0E8|S22A5_MOUSE Solute carrier family 22 member 5 OS=Mus musculus OX=10090 GN=Slc22a5 PE=1 SV=1
OG0000596	sp|P02671|FIBA_HUMAN Fibrinogen alpha chain OS=Homo sapiens OX=9606 GN=FGA PE=1 SV=2
OG0000609	sp|Q13255|GRM1_HUMAN Metabotropic glutamate receptor 1 OS=Homo sapiens OX=9606 GN=GRM1 PE=1 SV=3
OG0000613	sp|Q09575|YRD6_CAEEL Uncharacterized protein K02A2.6 OS=Caenorhabditis elegans OX=6239 GN=K02A2.6 PE=4 SV=1
OG0000635
OG0000654	sp|Q8TB03|CX038_HUMAN Uncharacterized protein CXorf38 OS=Homo sapiens OX=9606 GN=CXorf38 PE=1 SV=1
OG0000657	sp|Q9BRQ0|PYGO2_HUMAN Pygopus homolog 2 OS=Homo sapiens OX=9606 GN=PYGO2 PE=1 SV=2
OG0000684	sp|P04146|COPIA_DROME Copia protein OS=Drosophila melanogaster OX=7227 GN=GIP PE=1 SV=3
OG0000686
OG0000689	sp|P38040|GBG1_DROME Guanine nucleotide-binding protein subunit gamma-1 OS=Drosophila melanogaster OX=7227 GN=Ggamma1 PE=2 SV=1
OG0000692	sp|Q2EMV9|PAR14_MOUSE Protein mono-ADP-ribosyltransferase PARP14 OS=Mus musculus OX=10090 GN=Parp14 PE=1 SV=3
OG0000699	sp|P34457|YMD3_CAEEL Putative uncharacterized transposon-derived protein F54H12.3 OS=Caenorhabditis elegans OX=6239 GN=F54H12.3 PE=5 SV=1
OG0000708	sp|P14381|YTX2_XENLA Transposon TX1 uncharacterized 149 kDa protein OS=Xenopus laevis OX=8355 PE=4 SV=1
OG0000734	sp|Q02836|POL_SIVG1 Gag-Pol polyprotein OS=Simian immunodeficiency virus agm.grivet (isolate AGM gr-1) OX=31684 GN=gag-pol PE=3 SV=2
OG0000738	sp|Q870G1|LYS1_EMENI Saccharopine dehydrogenase [NAD(+), L-lysine-forming] OS=Emericella nidulans (strain FGSC A4 / ATCC 38163 / CBS 112.46 / NRRL 194 / M139) OX=227321 GN=lysA PE=3 SV=2
OG0000744	sp|Q8UUZ1|MB212_DANRE Protein mab-21-like 2 OS=Danio rerio OX=7955 GN=mab21l2 PE=1 SV=1
OG0000745	sp|Q8TGM7|ART2_YEAST Putative uncharacterized protein ART2 OS=Saccharomyces cerevisiae (strain ATCC 204508 / S288c) OX=559292 GN=ART2 PE=5 SV=1
OG0000747	sp|Q8TGM5|ART3_YEAST Putative uncharacterized protein ART3 OS=Saccharomyces cerevisiae (strain ATCC 204508 / S288c) OX=559292 GN=ART3 PE=5 SV=1
OG0000776	sp|Q8VCS0|PGRP2_MOUSE N-acetylmuramoyl-L-alanine amidase OS=Mus musculus OX=10090 GN=Pglyrp2 PE=1 SV=1
OG0000777	sp|Q5DU56|NLRC3_MOUSE Protein NLRC3 OS=Mus musculus OX=10090 GN=Nlrc3 PE=1 SV=2
OG0000802	sp|Q13449|LSAMP_HUMAN Limbic system-associated membrane protein OS=Homo sapiens OX=9606 GN=LSAMP PE=1 SV=2
OG0000804	sp|Q0VD34|PHYIP_BOVIN Phytanoyl-CoA hydroxylase-interacting protein OS=Bos taurus OX=9913 GN=PHYHIP PE=2 SV=1
OG0000831	sp|O75382|TRIM3_HUMAN Tripartite motif-containing protein 3 OS=Homo sapiens OX=9606 GN=TRIM3 PE=1 SV=2
OG0000832	sp|Q5ZJR8|ELOV6_CHICK Elongation of very long chain fatty acids protein 6 OS=Gallus gallus OX=9031 GN=ELOVL6 PE=2 SV=1
OG0000833	sp|O02751|CFDP2_BOVIN Craniofacial development protein 2 OS=Bos taurus OX=9913 GN=CFDP2 PE=1 SV=2
OG0000867	sp|O18875|SC6A8_BOVIN Sodium- and chloride-dependent creatine transporter 1 OS=Bos taurus OX=9913 GN=SLC6A8 PE=2 SV=1
OG0000886	sp|Q9UIH9|KLF15_HUMAN Krueppel-like factor 15 OS=Homo sapiens OX=9606 GN=KLF15 PE=1 SV=1
OG0000894	sp|P35072|TCB1_CAEBR Transposable element Tcb1 transposase OS=Caenorhabditis briggsae OX=6238 PE=3 SV=1
OG0000908	sp|P06605|TBA3_DROME Tubulin alpha-3 chain OS=Drosophila melanogaster OX=7227 GN=alphaTub84D PE=2 SV=1
OG0000914	sp|Q7L622|G2E3_HUMAN G2/M phase-specific E3 ubiquitin-protein ligase OS=Homo sapiens OX=9606 GN=G2E3 PE=1 SV=1
OG0000917	sp|Q4A3R3|DMBT1_PIG Deleted in malignant brain tumors 1 protein OS=Sus scrofa OX=9823 GN=DMBT1 PE=2 SV=1
OG0000926	sp|Q9UPX0|TUTLB_HUMAN Protein turtle homolog B OS=Homo sapiens OX=9606 GN=IGSF9B PE=2 SV=2
OG0000934	sp|Q05831|H1L_MYTTR Sperm-specific protein PHI-2B/PHI-3 OS=Mytilus trossulus OX=6551 PE=1 SV=2
OG0000937	sp|Q8BX37|ACP7_MOUSE Acid phosphatase type 7 OS=Mus musculus OX=10090 GN=Acp7 PE=2 SV=2
OG0000942	sp|P14381|YTX2_XENLA Transposon TX1 uncharacterized 149 kDa protein OS=Xenopus laevis OX=8355 PE=4 SV=1
OG0000958	sp|P46430|GSTT1_MANSE Glutathione S-transferase 1 OS=Manduca sexta OX=7130 GN=GST1 PE=2 SV=1
OG0000959	sp|Q0IID7|DUS10_BOVIN Dual specificity protein phosphatase 10 OS=Bos taurus OX=9913 GN=DUSP10 PE=2 SV=1
OG0000962	sp|Q941Q2|HBL2_BRANA Non-symbiotic hemoglobin 2 OS=Brassica napus OX=3708 GN=HB2 PE=3 SV=1
OG0000979	sp|P51452|DUS3_HUMAN Dual specificity protein phosphatase 3 OS=Homo sapiens OX=9606 GN=DUSP3 PE=1 SV=1
OG0000994	sp|O96006|ZBED1_HUMAN Zinc finger BED domain-containing protein 1 OS=Homo sapiens OX=9606 GN=ZBED1 PE=1 SV=1
OG0000997
OG0001007	sp|O16264|PEBPH_CAEEL Phosphatidylethanolamine-binding protein homolog F40A3.3 OS=Caenorhabditis elegans OX=6239 GN=F40A3.3 PE=3 SV=1
OG0001011	sp|P50592|TNF10_MOUSE Tumor necrosis factor ligand superfamily member 10 OS=Mus musculus OX=10090 GN=Tnfsf10 PE=2 SV=1
OG0001033	sp|Q03277|PO11_BRACO Retrovirus-related Pol polyprotein from type-1 retrotransposable element R1 (Fragment) OS=Bradysia coprophila OX=38358 PE=4 SV=1
OG0001038	sp|Q9R9J1|MYCA_BACIU Mycosubtilin synthase subunit A OS=Bacillus subtilis OX=1423 GN=mycA PE=1 SV=1
OG0001050	sp|W4VSJ0|ACES_TRILK Acetylcholinesterase-1 OS=Trittame loki OX=1295018 PE=1 SV=1
OG0001066	sp|A7SFB5|CGAS_NEMVE Cyclic GMP-AMP synthase OS=Nematostella vectensis OX=45351 GN=v1g211400 PE=1 SV=1
OG0001071
OG0001074	sp|Q8I7P9|POL5_DROME Retrovirus-related Pol polyprotein from transposon opus OS=Drosophila melanogaster OX=7227 GN=pol PE=4 SV=1
OG0001075
OG0001076	sp|Q95334|AMPE_PIG Glutamyl aminopeptidase OS=Sus scrofa OX=9823 GN=ENPEP PE=1 SV=1
OG0001089	sp|Q6P026|BAF_DANRE Barrier-to-autointegration factor OS=Danio rerio OX=7955 GN=banf1 PE=1 SV=1
OG0001116	sp|Q99M66|B2L10_RAT Bcl-2-like protein 10 OS=Rattus norvegicus OX=10116 GN=Bcl2l10 PE=2 SV=1
OG0001119	sp|Q9P2Y4|ZN219_HUMAN Zinc finger protein 219 OS=Homo sapiens OX=9606 GN=ZNF219 PE=1 SV=2
OG0001120	sp|Q6P9S0|MTSS2_MOUSE Protein MTSS 2 OS=Mus musculus OX=10090 GN=Mtss2 PE=1 SV=1
OG0001140	sp|Q5K651|SAMD9_HUMAN Sterile alpha motif domain-containing protein 9 OS=Homo sapiens OX=9606 GN=SAMD9 PE=1 SV=1
OG0001154	sp|P80018|GLBC_MOLAR Globin C, coelomic OS=Molpadia arenicola OX=7698 PE=1 SV=3
OG0001157	sp|Q96CG8|CTHR1_HUMAN Collagen triple helix repeat-containing protein 1 OS=Homo sapiens OX=9606 GN=CTHRC1 PE=1 SV=1
OG0001161	sp|Q90953|CSPG2_CHICK Versican core protein OS=Gallus gallus OX=9031 GN=VCAN PE=2 SV=1
OG0001178	sp|Q8SQ34|TNR5_PIG Tumor necrosis factor receptor superfamily member 5 OS=Sus scrofa OX=9823 GN=CD40 PE=2 SV=1
OG0001192	sp|Q9HC52|CBX8_HUMAN Chromobox protein homolog 8 OS=Homo sapiens OX=9606 GN=CBX8 PE=1 SV=3
OG0001246	sp|P54422|GGT_BACSU Glutathione hydrolase proenzyme OS=Bacillus subtilis (strain 168) OX=224308 GN=ggt PE=1 SV=1
OG0001247	sp|P0DP91|ERPG3_HUMAN Chimeric ERCC6-PGBD3 protein OS=Homo sapiens OX=9606 GN=ERCC6 PE=1 SV=1
OG0001251	sp|P83916|CBX1_HUMAN Chromobox protein homolog 1 OS=Homo sapiens OX=9606 GN=CBX1 PE=1 SV=1
OG0001280	sp|P0CG71|UBIQ1_CAEEL Polyubiquitin-A OS=Caenorhabditis elegans OX=6239 GN=ubq-1 PE=3 SV=1
OG0001290	sp|Q9H5L6|THAP9_HUMAN DNA transposase THAP9 OS=Homo sapiens OX=9606 GN=THAP9 PE=1 SV=2
OG0001305
OG0001354
OG0001365
OG0001373	sp|Q9HCK4|ROBO2_HUMAN Roundabout homolog 2 OS=Homo sapiens OX=9606 GN=ROBO2 PE=1 SV=2
OG0001381	sp|Q63421|PDE1C_RAT Calcium/calmodulin-dependent 3',5'-cyclic nucleotide phosphodiesterase 1C OS=Rattus norvegicus OX=10116 GN=Pde1c PE=1 SV=1
OG0001390	sp|P29375|KDM5A_HUMAN Lysine-specific demethylase 5A OS=Homo sapiens OX=9606 GN=KDM5A PE=1 SV=3
OG0001399	sp|D3YXG0|HMCN1_MOUSE Hemicentin-1 OS=Mus musculus OX=10090 GN=Hmcn1 PE=1 SV=1
OG0001407	sp|Q32P85|DLRB2_BOVIN Dynein light chain roadblock-type 2 OS=Bos taurus OX=9913 GN=DYNLRB2 PE=3 SV=1
OG0001412	sp|Q9SF85|ADK1_ARATH Adenosine kinase 1 OS=Arabidopsis thaliana OX=3702 GN=ADK1 PE=1 SV=1
OG0001416	sp|Q96SJ8|TSN18_HUMAN Tetraspanin-18 OS=Homo sapiens OX=9606 GN=TSPAN18 PE=2 SV=1
OG0001451	sp|Q9BRQ0|PYGO2_HUMAN Pygopus homolog 2 OS=Homo sapiens OX=9606 GN=PYGO2 PE=1 SV=2
OG0001473	sp|P55013|S12A2_SQUAC Solute carrier family 12 member 2 OS=Squalus acanthias OX=7797 GN=SLC12A2 PE=1 SV=1
OG0001474	sp|Q9FYZ9|BAMT_ANTMA Benzoate carboxyl methyltransferase OS=Antirrhinum majus OX=4151 GN=BAMT PE=1 SV=1
OG0001499	sp|Q4LDE5|SVEP1_HUMAN Sushi, von Willebrand factor type A, EGF and pentraxin domain-containing protein 1 OS=Homo sapiens OX=9606 GN=SVEP1 PE=1 SV=3
OG0001504
OG0001531	sp|Q9W0K4|BAB2_DROME Protein bric-a-brac 2 OS=Drosophila melanogaster OX=7227 GN=bab2 PE=1 SV=2
OG0001549	sp|P10090|WHITE_DROME Protein white OS=Drosophila melanogaster OX=7227 GN=w PE=2 SV=2
OG0001638	sp|Q9I926|FUCL6_ANGJA Fucolectin-6 OS=Anguilla japonica OX=7937 PE=2 SV=1
OG0001664	sp|Q9YGN1|SAND_TAKRU Protein SAND OS=Takifugu rubripes OX=31033 GN=sand PE=3 SV=1
OG0001669	sp|Q8IZJ3|CPMD8_HUMAN C3 and PZP-like alpha-2-macroglobulin domain-containing protein 8 OS=Homo sapiens OX=9606 GN=CPAMD8 PE=1 SV=2
OG0001671	sp|A4IFA3|GT2D2_BOVIN General transcription factor II-I repeat domain-containing protein 2 OS=Bos taurus OX=9913 GN=GTF2IRD2 PE=2 SV=1
OG0001672
OG0001680	sp|O95185|UNC5C_HUMAN Netrin receptor UNC5C OS=Homo sapiens OX=9606 GN=UNC5C PE=1 SV=2
OG0001685
OG0001690	sp|Q9LQV2|RDR1_ARATH RNA-dependent RNA polymerase 1 OS=Arabidopsis thaliana OX=3702 GN=RDR1 PE=2 SV=1
OG0001707	sp|Q9BTC0|DIDO1_HUMAN Death-inducer obliterator 1 OS=Homo sapiens OX=9606 GN=DIDO1 PE=1 SV=5
OG0001727	sp|Q6R2W3|SCND3_HUMAN SCAN domain-containing protein 3 OS=Homo sapiens OX=9606 GN=ZBED9 PE=2 SV=1
OG0001782	sp|E7FAM5|LIN41_DANRE E3 ubiquitin-protein ligase TRIM71 OS=Danio rerio OX=7955 GN=trim71 PE=1 SV=1
OG0001790
OG0001793	sp|P98172|EFNB1_HUMAN Ephrin-B1 OS=Homo sapiens OX=9606 GN=EFNB1 PE=1 SV=1
OG0001822	sp|Q9XSW3|MBL2_PIG Mannose-binding protein C OS=Sus scrofa OX=9823 GN=MBL2 PE=1 SV=1
OG0001842
OG0001846
OG0001914	sp|Q05974|RAB1A_LYMST Ras-related protein Rab-1A OS=Lymnaea stagnalis OX=6523 GN=RAB1A PE=2 SV=1
OG0001943	sp|Q32LE3|CETN1_BOVIN Centrin-1 OS=Bos taurus OX=9913 GN=CETN1 PE=2 SV=1
OG0001956
OG0001958	sp|Q5QD21|TAA7C_RAT Trace amine-associated receptor 7c OS=Rattus norvegicus OX=10116 GN=Taar7c PE=3 SV=1
OG0001960	sp|Q9NY37|ASIC5_HUMAN Acid-sensing ion channel 5 OS=Homo sapiens OX=9606 GN=ASIC5 PE=1 SV=1
OG0001961	sp|Q5UQV1|YR354_MIMIV Uncharacterized protein R354 OS=Acanthamoeba polyphaga mimivirus OX=212035 GN=MIMI_R354 PE=1 SV=1
OG0002020
OG0002051
OG0002061	sp|Q9XSC9|TCO2_BOVIN Transcobalamin-2 OS=Bos taurus OX=9913 GN=TCN2 PE=1 SV=1
OG0002072	sp|P38411|GNAQ_LYMST Guanine nucleotide-binding protein G(q) subunit alpha OS=Lymnaea stagnalis OX=6523 PE=2 SV=1
OG0002117	sp|Q95SX7|RTBS_DROME Probable RNA-directed DNA polymerase from transposon BS OS=Drosophila melanogaster OX=7227 GN=RTase PE=2 SV=1
OG0002119	sp|Q9VCR3|COW_DROME Proteoglycan Cow OS=Drosophila melanogaster OX=7227 GN=Cow PE=1 SV=3
OG0002124	sp|Q0P5A5|CKS1_BOVIN Cyclin-dependent kinases regulatory subunit 1 OS=Bos taurus OX=9913 GN=CKS1B PE=3 SV=1
OG0002140	sp|Q95SX7|RTBS_DROME Probable RNA-directed DNA polymerase from transposon BS OS=Drosophila melanogaster OX=7227 GN=RTase PE=2 SV=1
OG0002171	sp|Q96MM6|HS12B_HUMAN Heat shock 70 kDa protein 12B OS=Homo sapiens OX=9606 GN=HSPA12B PE=1 SV=2
OG0002207	sp|P79995|CAD10_CHICK Cadherin-10 OS=Gallus gallus OX=9031 GN=CDH10 PE=2 SV=1
OG0002213	sp|Q96L42|KCNH8_HUMAN Potassium voltage-gated channel subfamily H member 8 OS=Homo sapiens OX=9606 GN=KCNH8 PE=2 SV=2
OG0002217	sp|Q91WD2|TRPV6_MOUSE Transient receptor potential cation channel subfamily V member 6 OS=Mus musculus OX=10090 GN=Trpv6 PE=1 SV=2
OG0002218	sp|P21329|RTJK_DROFU RNA-directed DNA polymerase from mobile element jockey OS=Drosophila funebris OX=7221 GN=jockey\pol PE=1 SV=1
OG0002220	sp|Q9N126|RDH8_BOVIN Retinol dehydrogenase 8 OS=Bos taurus OX=9913 GN=RDH8 PE=1 SV=1
OG0002221
OG0002233	sp|Q8CE94|MOT13_MOUSE Monocarboxylate transporter 13 OS=Mus musculus OX=10090 GN=Slc16a13 PE=2 SV=1
OG0002264	sp|Q28XE2|AN32A_DROPS Acidic leucine-rich nuclear phosphoprotein 32 family member A OS=Drosophila pseudoobscura pseudoobscura OX=46245 GN=Anp32a PE=3 SV=2
OG0002368	sp|Q03FR6|DNAJ_PEDPA Chaperone protein DnaJ OS=Pediococcus pentosaceus (strain ATCC 25745 / CCUG 21536 / LMG 10740 / 183-1w) OX=278197 GN=dnaJ PE=3 SV=1
OG0002374	sp|Q9HCM9|TRI39_HUMAN E3 ubiquitin-protein ligase TRIM39 OS=Homo sapiens OX=9606 GN=TRIM39 PE=1 SV=2
OG0002391	sp|Q01833|CO3_NAJNA Complement C3 OS=Naja naja OX=35670 GN=C3 PE=2 SV=1
OG0002394	sp|Q96MM6|HS12B_HUMAN Heat shock 70 kDa protein 12B OS=Homo sapiens OX=9606 GN=HSPA12B PE=1 SV=2
OG0002409	sp|C3ZQF9|QRFPR_BRAFL QRFP-like peptide receptor OS=Branchiostoma floridae OX=7739 GN=QRFPR PE=3 SV=1
OG0002516	sp|Q8C525|M21D2_MOUSE Protein MB21D2 OS=Mus musculus OX=10090 GN=Mb21d2 PE=1 SV=1
OG0002517	sp|Q5ZIR1|SHLB1_CHICK Endophilin-B1 OS=Gallus gallus OX=9031 GN=SH3GLB1 PE=2 SV=1
OG0002531	sp|P04323|POL3_DROME Retrovirus-related Pol polyprotein from transposon 17.6 OS=Drosophila melanogaster OX=7227 GN=pol PE=4 SV=1
OG0002534	sp|Q9I928|FUCL4_ANGJA Fucolectin-4 OS=Anguilla japonica OX=7937 PE=2 SV=1
OG0002543	sp|Q5ZJP7|KCTD7_CHICK BTB/POZ domain-containing protein KCTD7 OS=Gallus gallus OX=9031 GN=KCTD7 PE=2 SV=1
OG0002581	sp|Q6TFL4|KLH24_HUMAN Kelch-like protein 24 OS=Homo sapiens OX=9606 GN=KLHL24 PE=1 SV=1
OG0002630	sp|Q08201|MDR3_RAT Phosphatidylcholine translocator ABCB4 OS=Rattus norvegicus OX=10116 GN=Abcb4 PE=1 SV=1
OG0002643	sp|Q9GLE5|MMP2_BOVIN 72 kDa type IV collagenase OS=Bos taurus OX=9913 GN=MMP2 PE=2 SV=1
OG0002719
OG0002749	sp|P0CV25|RLR78_PLAVT Secreted RxLR effector protein 78 OS=Plasmopara viticola OX=143451 GN=RXLR78 PE=3 SV=1
OG0002811	sp|Q99315|YG31B_YEAST Transposon Ty3-G Gag-Pol polyprotein OS=Saccharomyces cerevisiae (strain ATCC 204508 / S288c) OX=559292 GN=TY3B-G PE=1 SV=3
OG0002815	sp|F1M649|NLRC4_RAT NLR family CARD domain-containing protein 4 OS=Rattus norvegicus OX=10116 GN=Nlrc4 PE=3 SV=2
OG0002818	sp|Q5VYS4|MEDAG_HUMAN Mesenteric estrogen-dependent adipogenesis protein OS=Homo sapiens OX=9606 GN=MEDAG PE=1 SV=1
OG0002871	sp|Q6DEY1|SPF30_XENTR Survival of motor neuron-related-splicing factor 30 OS=Xenopus tropicalis OX=8364 GN=smndc1 PE=2 SV=1
OG0002873	sp|Q2KII4|ELOC_BOVIN Elongin-C OS=Bos taurus OX=9913 GN=ELOC PE=1 SV=1
OG0002976	sp|Q60519|SEM5B_MOUSE Semaphorin-5B OS=Mus musculus OX=10090 GN=Sema5b PE=2 SV=2
OG0002984	sp|Q21415|GLR3_CAEEL Glutamate receptor ionotropic, kainate glr-3 OS=Caenorhabditis elegans OX=6239 GN=glr-3 PE=1 SV=3
OG0002998	sp|Q812A5|PRR5_MOUSE Proline-rich protein 5 OS=Mus musculus OX=10090 GN=Prr5 PE=1 SV=2
OG0003026	sp|Q9XVZ8|ELOF1_CAEEL Transcription elongation factor 1 homolog OS=Caenorhabditis elegans OX=6239 GN=Y54G11A.11 PE=3 SV=1
OG0003062	sp|Q10126|YSM6_CAEEL Putative uncharacterized transposon-derived protein F52C9.6 OS=Caenorhabditis elegans OX=6239 GN=F52C9.6 PE=5 SV=1
OG0003077	sp|O14727|APAF_HUMAN Apoptotic protease-activating factor 1 OS=Homo sapiens OX=9606 GN=APAF1 PE=1 SV=2
OG0003098	sp|Q8TBZ3|WDR20_HUMAN WD repeat-containing protein 20 OS=Homo sapiens OX=9606 GN=WDR20 PE=1 SV=2
OG0003103	sp|Q6DG22|ADA_DANRE Adenosine deaminase OS=Danio rerio OX=7955 GN=ada PE=2 SV=2
OG0003223	sp|Q9NWW9|PLAT2_HUMAN Phospholipase A and acyltransferase 2 OS=Homo sapiens OX=9606 GN=PLAAT2 PE=1 SV=1
OG0003230	sp|O46606|DDHD1_BOVIN Phospholipase DDHD1 OS=Bos taurus OX=9913 GN=DDHD1 PE=1 SV=1
OG0003263	sp|Q8VEK6|ING3_MOUSE Inhibitor of growth protein 3 OS=Mus musculus OX=10090 GN=Ing3 PE=1 SV=2
OG0003264	sp|P70445|4EBP2_MOUSE Eukaryotic translation initiation factor 4E-binding protein 2 OS=Mus musculus OX=10090 GN=Eif4ebp2 PE=1 SV=1
OG0003280	sp|Q1RK83|Y150_RICBR Putative ankyrin repeat protein RBE_0150 OS=Rickettsia bellii (strain RML369-C) OX=336407 GN=RBE_0150 PE=4 SV=1
OG0003282
OG0003291
OG0003311	sp|Q2VPA4|CR1L_HUMAN Complement component receptor 1-like protein OS=Homo sapiens OX=9606 GN=CR1L PE=1 SV=3
OG0003314	sp|Q2IA00|SPEF2_PIG Sperm flagellar protein 2 OS=Sus scrofa OX=9823 GN=SPEF2 PE=2 SV=1
OG0003384	sp|Q9EQC0|CHST1_MOUSE Carbohydrate sulfotransferase 1 OS=Mus musculus OX=10090 GN=Chst1 PE=2 SV=1
OG0003395	sp|Q6AYJ1|RECQ1_RAT ATP-dependent DNA helicase Q1 OS=Rattus norvegicus OX=10116 GN=Recql PE=1 SV=1
OG0003420	sp|Q5VWG9|TAF3_HUMAN Transcription initiation factor TFIID subunit 3 OS=Homo sapiens OX=9606 GN=TAF3 PE=1 SV=1
OG0003474	sp|P0DP91|ERPG3_HUMAN Chimeric ERCC6-PGBD3 protein OS=Homo sapiens OX=9606 GN=ERCC6 PE=1 SV=1
OG0003495	sp|Q9D1A2|CNDP2_MOUSE Cytosolic non-specific dipeptidase OS=Mus musculus OX=10090 GN=Cndp2 PE=1 SV=1
OG0003516	sp|Q925T6|GRIP1_MOUSE Glutamate receptor-interacting protein 1 OS=Mus musculus OX=10090 GN=Grip1 PE=1 SV=1
OG0003535	sp|P26818|ARBK2_BOVIN Beta-adrenergic receptor kinase 2 OS=Bos taurus OX=9913 GN=GRK3 PE=2 SV=1
OG0003550	sp|Q9NVE5|UBP40_HUMAN Ubiquitin carboxyl-terminal hydrolase 40 OS=Homo sapiens OX=9606 GN=USP40 PE=1 SV=3
OG0003576	sp|Q6P0F9|INS1A_DANRE Insulinoma-associated protein 1a OS=Danio rerio OX=7955 GN=insm1a PE=2 SV=1
OG0003591	sp|Q6IV77|TAZ_MACMU Tafazzin OS=Macaca mulatta OX=9544 GN=TAZ PE=2 SV=1
OG0003621	sp|Q9UPN3|MACF1_HUMAN Microtubule-actin cross-linking factor 1, isoforms 1/2/3/5 OS=Homo sapiens OX=9606 GN=MACF1 PE=1 SV=4
OG0003645	sp|Q03277|PO11_BRACO Retrovirus-related Pol polyprotein from type-1 retrotransposable element R1 (Fragment) OS=Bradysia coprophila OX=38358 PE=4 SV=1
OG0003646	sp|Q99315|YG31B_YEAST Transposon Ty3-G Gag-Pol polyprotein OS=Saccharomyces cerevisiae (strain ATCC 204508 / S288c) OX=559292 GN=TY3B-G PE=1 SV=3
OG0003647	sp|Q9VAC5|ADA17_DROME ADAM 17-like protease OS=Drosophila melanogaster OX=7227 GN=Tace PE=2 SV=2
OG0003648	sp|Q9UYB9|BUD32_PYRAB KEOPS complex subunit Bud32 OS=Pyrococcus abyssi (strain GE5 / Orsay) OX=272844 GN=bud32 PE=1 SV=1
OG0003672	sp|Q8CI59|STEA3_MOUSE Metalloreductase STEAP3 OS=Mus musculus OX=10090 GN=Steap3 PE=1 SV=1
OG0003751	sp|Q65Z59|YPEL1_CHLAE Protein yippee-like 1 OS=Chlorocebus aethiops OX=9534 GN=YPEL1 PE=3 SV=1
OG0003806	sp|Q920A6|RISC_RAT Retinoid-inducible serine carboxypeptidase OS=Rattus norvegicus OX=10116 GN=Scpep1 PE=2 SV=1
OG0003815	sp|Q9R085|UBP15_RAT Ubiquitin carboxyl-terminal hydrolase 15 OS=Rattus norvegicus OX=10116 GN=Usp15 PE=1 SV=1
OG0003854	sp|Q2KJI3|CYRIB_BOVIN CYFIP-related Rac1 interactor B OS=Bos taurus OX=9913 GN=CYRIB PE=2 SV=1
OG0003874	sp|O15514|RPB4_HUMAN DNA-directed RNA polymerase II subunit RPB4 OS=Homo sapiens OX=9606 GN=POLR2D PE=1 SV=1
OG0003883	sp|Q03278|PO21_NASVI Retrovirus-related Pol polyprotein from type-1 retrotransposable element R2 (Fragment) OS=Nasonia vitripennis OX=7425 PE=4 SV=2
OG0003897	sp|Q95SX7|RTBS_DROME Probable RNA-directed DNA polymerase from transposon BS OS=Drosophila melanogaster OX=7227 GN=RTase PE=2 SV=1
OG0003955	sp|Q8R0F8|FAHD1_MOUSE Acylpyruvase FAHD1, mitochondrial OS=Mus musculus OX=10090 GN=Fahd1 PE=1 SV=2
OG0004008	sp|Q09575|YRD6_CAEEL Uncharacterized protein K02A2.6 OS=Caenorhabditis elegans OX=6239 GN=K02A2.6 PE=4 SV=1
OG0004012
OG0004019	sp|Q27888|LDH_CAEEL L-lactate dehydrogenase OS=Caenorhabditis elegans OX=6239 GN=ldh-1 PE=2 SV=1
OG0004020	sp|P53988|MOT2_MESAU Monocarboxylate transporter 2 OS=Mesocricetus auratus OX=10036 GN=SLC16A7 PE=1 SV=1
OG0004023	sp|Q9NQX1|PRDM5_HUMAN PR domain zinc finger protein 5 OS=Homo sapiens OX=9606 GN=PRDM5 PE=1 SV=2
OG0004056	sp|Q6P5L8|HSDL2_DANRE Hydroxysteroid dehydrogenase-like protein 2 OS=Danio rerio OX=7955 GN=hsdl2 PE=2 SV=1
OG0004061	sp|Q0EEE2|PTHD3_MOUSE Patched domain-containing protein 3 OS=Mus musculus OX=10090 GN=Ptchd3 PE=1 SV=1
OG0004119	sp|Q99KH8|STK24_MOUSE Serine/threonine-protein kinase 24 OS=Mus musculus OX=10090 GN=Stk24 PE=1 SV=1
OG0004122	sp|Q92536|YLAT2_HUMAN Y+L amino acid transporter 2 OS=Homo sapiens OX=9606 GN=SLC7A6 PE=1 SV=3
OG0004141	sp|Q9R0N8|SYT6_MOUSE Synaptotagmin-6 OS=Mus musculus OX=10090 GN=Syt6 PE=1 SV=2
OG0004144	sp|P45883|ACBP_PELRI Acyl-CoA-binding protein homolog OS=Pelophylax ridibundus OX=8406 PE=1 SV=2
OG0004263	sp|Q7ZXF3|ID4_XENLA DNA-binding protein inhibitor ID-4 OS=Xenopus laevis OX=8355 GN=id4 PE=2 SV=1
OG0004285	sp|Q5RCT0|CX6B1_PONAB Cytochrome c oxidase subunit 6B1 OS=Pongo abelii OX=9601 GN=COX6B1 PE=3 SV=3
OG0004469
OG0004481	sp|Q04202|TCB2_CAEBR Transposable element Tcb2 transposase OS=Caenorhabditis briggsae OX=6238 PE=3 SV=1
OG0004497	sp|Q9D241|RN186_MOUSE E3 ubiquitin-protein ligase RNF186 OS=Mus musculus OX=10090 GN=Rnf186 PE=2 SV=3
OG0004499	sp|Q9UF56|FXL17_HUMAN F-box/LRR-repeat protein 17 OS=Homo sapiens OX=9606 GN=FBXL17 PE=1 SV=3
OG0004502	sp|Q9J4Z6|V244_FOWPN Putative ankyrin repeat protein FPV244 OS=Fowlpox virus (strain NVSL) OX=928301 GN=FPV244 PE=4 SV=1
OG0004503	sp|Q8CI17|MB213_MOUSE Protein mab-21-like 3 OS=Mus musculus OX=10090 GN=Mab21L3 PE=2 SV=2
OG0004504	sp|Q7JK24|B3GT1_GORGO Beta-1,3-galactosyltransferase 1 OS=Gorilla gorilla gorilla OX=9595 GN=B3GALT1 PE=3 SV=1
OG0004526	sp|P55024|TYRO_CHICK Tyrosinase OS=Gallus gallus OX=9031 GN=TYR PE=2 SV=1
OG0004541	sp|Q0R4F1|PIF1_XENLA ATP-dependent DNA helicase PIF1 OS=Xenopus laevis OX=8355 GN=pif1 PE=2 SV=1
OG0004549	sp|O76536|HYAL_STRPU Hyalin (Fragment) OS=Strongylocentrotus purpuratus OX=7668 PE=2 SV=1
OG0004575	sp|Q641B9|APC5C_XENLA Actin-related protein 2/3 complex subunit 5-C OS=Xenopus laevis OX=8355 GN=arpc5-c PE=2 SV=1
OG0004595	sp|Q9D8B6|F210B_MOUSE Protein FAM210B, mitochondrial OS=Mus musculus OX=10090 GN=Fam210b PE=1 SV=3
OG0004600	sp|Q9XYM0|CRK_DROME Adapter molecule Crk OS=Drosophila melanogaster OX=7227 GN=Crk PE=1 SV=1
OG0004660	sp|P76482|YFBL_ECOLI Uncharacterized protein YfbL OS=Escherichia coli (strain K12) OX=83333 GN=yfbL PE=4 SV=2
OG0004672	sp|Q15399|TLR1_HUMAN Toll-like receptor 1 OS=Homo sapiens OX=9606 GN=TLR1 PE=1 SV=3
OG0004728	sp|Q32LN1|UBE2H_BOVIN Ubiquitin-conjugating enzyme E2 H OS=Bos taurus OX=9913 GN=UBE2H PE=2 SV=1
OG0004769	sp|Q66IY8|I2BLA_XENLA Interferon regulatory factor 2-binding protein-like A OS=Xenopus laevis OX=8355 GN=irf2bpl-a PE=2 SV=1
OG0004867	sp|Q9W6I0|UQCC1_XENLA Ubiquinol-cytochrome-c reductase complex assembly factor 1 OS=Xenopus laevis OX=8355 GN=uqcc1 PE=2 SV=1
OG0004929	sp|Q9NRL2|BAZ1A_HUMAN Bromodomain adjacent to zinc finger domain protein 1A OS=Homo sapiens OX=9606 GN=BAZ1A PE=1 SV=2
OG0004994	sp|Q6PHY8|SELTB_DANRE Thioredoxin reductase-like selenoprotein T1b OS=Danio rerio OX=7955 GN=selenot1b PE=2 SV=3
OG0005011	sp|Q8N4B1|SESQ1_HUMAN Sesquipedalian-1 OS=Homo sapiens OX=9606 GN=PHETA1 PE=1 SV=1
OG0005026	sp|Q9P0U3|SENP1_HUMAN Sentrin-specific protease 1 OS=Homo sapiens OX=9606 GN=SENP1 PE=1 SV=2
OG0005037	sp|Q5ZI27|NAIF1_CHICK Nuclear apoptosis-inducing factor 1 OS=Gallus gallus OX=9031 GN=NAIF1 PE=2 SV=1
OG0005045	sp|Q9CWV7|ZSWM1_MOUSE Zinc finger SWIM domain-containing protein 1 OS=Mus musculus OX=10090 GN=Zswim1 PE=2 SV=1
OG0005046	sp|Q28HX4|IFT57_XENTR Intraflagellar transport protein 57 homolog OS=Xenopus tropicalis OX=8364 GN=ift57 PE=2 SV=1
OG0005087	sp|F6UA42|UHRF1_XENTR E3 ubiquitin-protein ligase UHRF1 OS=Xenopus tropicalis OX=8364 GN=uhrf1 PE=3 SV=2
OG0005102	sp|Q9UQV4|LAMP3_HUMAN Lysosome-associated membrane glycoprotein 3 OS=Homo sapiens OX=9606 GN=LAMP3 PE=1 SV=3
OG0005144	sp|O94761|RECQ4_HUMAN ATP-dependent DNA helicase Q4 OS=Homo sapiens OX=9606 GN=RECQL4 PE=1 SV=2
OG0005188
OG0005205	sp|A2VDL9|T184B_BOVIN Transmembrane protein 184B OS=Bos taurus OX=9913 GN=TMEM184B PE=2 SV=1
OG0005227	sp|P61587|RND3_HUMAN Rho-related GTP-binding protein RhoE OS=Homo sapiens OX=9606 GN=RND3 PE=1 SV=1
OG0005236	sp|A6BMK7|NEUR1_BOVIN Sialidase-1 OS=Bos taurus OX=9913 GN=NEU1 PE=2 SV=2
OG0005264	sp|P38935|SMBP2_HUMAN DNA-binding protein SMUBP-2 OS=Homo sapiens OX=9606 GN=IGHMBP2 PE=1 SV=3
OG0005272	sp|Q9CQR6|PPP6_MOUSE Serine/threonine-protein phosphatase 6 catalytic subunit OS=Mus musculus OX=10090 GN=Ppp6c PE=1 SV=1
OG0005298	sp|P60467|SC61B_CANLF Protein transport protein Sec61 subunit beta OS=Canis lupus familiaris OX=9615 GN=SEC61B PE=1 SV=2
OG0005306	sp|P40337|VHL_HUMAN von Hippel-Lindau disease tumor suppressor OS=Homo sapiens OX=9606 GN=VHL PE=1 SV=2
OG0005327	sp|B6VQA1|DIMM_DROME Protein dimmed OS=Drosophila melanogaster OX=7227 GN=dimm PE=1 SV=1
OG0005331	sp|Q98989|STXA_SYNHO Stonustoxin subunit alpha OS=Synanceia horrida OX=13279 PE=1 SV=3
OG0005377	sp|A2RV80|GRAM4_XENLA GRAM domain-containing protein 4 OS=Xenopus laevis OX=8355 GN=gramd4 PE=2 SV=1
OG0005379	sp|B0JZG0|S23A2_XENTR Solute carrier family 23 member 2 OS=Xenopus tropicalis OX=8364 GN=slc23a2 PE=2 SV=1
OG0005398	sp|Q9GZN2|TGIF2_HUMAN Homeobox protein TGIF2 OS=Homo sapiens OX=9606 GN=TGIF2 PE=1 SV=1
OG0005596	sp|Q5NCX5|NEUL4_MOUSE Neuralized-like protein 4 OS=Mus musculus OX=10090 GN=Neurl4 PE=1 SV=1
OG0005629	sp|Q5BIN6|CNIH1_BOVIN Protein cornichon homolog 1 OS=Bos taurus OX=9913 GN=CNIH1 PE=2 SV=1
OG0005657
OG0005675	sp|P10394|POL4_DROME Retrovirus-related Pol polyprotein from transposon 412 OS=Drosophila melanogaster OX=7227 GN=POL PE=4 SV=1
OG0005700	sp|Q9JHI5|IVD_MOUSE Isovaleryl-CoA dehydrogenase, mitochondrial OS=Mus musculus OX=10090 GN=Ivd PE=1 SV=1
OG0005702	sp|Q2PZL6|FAT4_MOUSE Protocadherin Fat 4 OS=Mus musculus OX=10090 GN=Fat4 PE=1 SV=2
OG0005703	sp|Q9H7P6|MB12B_HUMAN Multivesicular body subunit 12B OS=Homo sapiens OX=9606 GN=MVB12B PE=1 SV=2
OG0005714	sp|Q7Z407|CSMD3_HUMAN CUB and sushi domain-containing protein 3 OS=Homo sapiens OX=9606 GN=CSMD3 PE=2 SV=3
OG0005761	sp|Q3T178|VPS28_BOVIN Vacuolar protein sorting-associated protein 28 homolog OS=Bos taurus OX=9913 GN=VPS28 PE=2 SV=1
OG0005810
OG0005811	sp|Q3ZCF3|SKP1_BOVIN S-phase kinase-associated protein 1 OS=Bos taurus OX=9913 GN=SKP1 PE=2 SV=1
OG0005869	sp|Q569Z5|DDX46_MOUSE Probable ATP-dependent RNA helicase DDX46 OS=Mus musculus OX=10090 GN=Ddx46 PE=1 SV=2
OG0005882	sp|Q9UG63|ABCF2_HUMAN ATP-binding cassette sub-family F member 2 OS=Homo sapiens OX=9606 GN=ABCF2 PE=1 SV=2
OG0005888	sp|Q9MA55|ACBP4_ARATH Acyl-CoA-binding domain-containing protein 4 OS=Arabidopsis thaliana OX=3702 GN=ACBP4 PE=1 SV=1
OG0005901	sp|O60290|ZN862_HUMAN Zinc finger protein 862 OS=Homo sapiens OX=9606 GN=ZNF862 PE=2 SV=2
OG0005904	sp|Q9W725|UCP2_CYPCA Mitochondrial uncoupling protein 2 OS=Cyprinus carpio OX=7962 GN=ucp2 PE=2 SV=1
OG0005930	sp|Q9DEY9|BLM_XENLA Bloom syndrome protein homolog OS=Xenopus laevis OX=8355 GN=blm PE=2 SV=1
OG0005954	sp|D4ACP5|RECQ5_RAT ATP-dependent DNA helicase Q5 OS=Rattus norvegicus OX=10116 GN=Recql5 PE=1 SV=1
OG0006095	sp|A0MTA1|APEX1_DANRE DNA-(apurinic or apyrimidinic site) endonuclease OS=Danio rerio OX=7955 GN=apex1 PE=1 SV=1
OG0006125	sp|P08138|TNR16_HUMAN Tumor necrosis factor receptor superfamily member 16 OS=Homo sapiens OX=9606 GN=NGFR PE=1 SV=1
OG0006137	sp|Q9HCU5|PREB_HUMAN Prolactin regulatory element-binding protein OS=Homo sapiens OX=9606 GN=PREB PE=1 SV=2
OG0006156	sp|Q6P7Q4|LGUL_RAT Lactoylglutathione lyase OS=Rattus norvegicus OX=10116 GN=Glo1 PE=1 SV=3
OG0006177	sp|Q5ZMC6|GSKIP_CHICK GSK3-beta interaction protein OS=Gallus gallus OX=9031 GN=GSKIP PE=2 SV=1
OG0006184
OG0006237	sp|Q99LW6|YAF2_MOUSE YY1-associated factor 2 OS=Mus musculus OX=10090 GN=Yaf2 PE=1 SV=1
OG0006306	sp|O60258|FGF17_HUMAN Fibroblast growth factor 17 OS=Homo sapiens OX=9606 GN=FGF17 PE=1 SV=1
OG0006335
OG0006342	sp|Q27441|NPY_APLCA Pro-neuropeptide Y OS=Aplysia californica OX=6500 GN=NPY PE=1 SV=1
OG0006358
OG0006359	sp|Q3T0G1|THAP1_BOVIN THAP domain-containing protein 1 OS=Bos taurus OX=9913 GN=THAP1 PE=2 SV=1
OG0006365	sp|Q7Z2Y8|GVIN1_HUMAN Interferon-induced very large GTPase 1 OS=Homo sapiens OX=9606 GN=GVINP1 PE=2 SV=2
OG0006366	sp|Q7Z5J8|ANKAR_HUMAN Ankyrin and armadillo repeat-containing protein OS=Homo sapiens OX=9606 GN=ANKAR PE=2 SV=3
OG0006378
OG0006400	sp|Q96MH2|HEXI2_HUMAN Protein HEXIM2 OS=Homo sapiens OX=9606 GN=HEXIM2 PE=1 SV=1
OG0006409	sp|Q5M9I5|QCR6_RAT Cytochrome b-c1 complex subunit 6, mitochondrial OS=Rattus norvegicus OX=10116 GN=Uqcrh PE=3 SV=1
OG0006440	sp|Q6NT76|HMBX1_HUMAN Homeobox-containing protein 1 OS=Homo sapiens OX=9606 GN=HMBOX1 PE=1 SV=1
OG0006458	sp|Q66KY3|CUTA_XENLA Protein CutA homolog OS=Xenopus laevis OX=8355 GN=cuta PE=2 SV=2
OG0006515	sp|P54131|ACHA7_BOVIN Neuronal acetylcholine receptor subunit alpha-7 OS=Bos taurus OX=9913 GN=CHRNA7 PE=1 SV=1
OG0006524	sp|Q7ZYA7|DDI2_XENLA Protein DDI1 homolog 2 OS=Xenopus laevis OX=8355 GN=ddi2 PE=2 SV=1
OG0006528	sp|Q4ZHG4|FNDC1_HUMAN Fibronectin type III domain-containing protein 1 OS=Homo sapiens OX=9606 GN=FNDC1 PE=2 SV=4
OG0006534	sp|P56559|ARL4C_HUMAN ADP-ribosylation factor-like protein 4C OS=Homo sapiens OX=9606 GN=ARL4C PE=1 SV=1
OG0006536	sp|Q9XSI3|RL10_BOVIN 60S ribosomal protein L10 OS=Bos taurus OX=9913 GN=RPL10 PE=2 SV=4
OG0006546	sp|Q62640|GRID1_RAT Glutamate receptor ionotropic, delta-1 OS=Rattus norvegicus OX=10116 GN=Grid1 PE=1 SV=1
OG0006565
OG0006571	sp|Q8NB14|UBP38_HUMAN Ubiquitin carboxyl-terminal hydrolase 38 OS=Homo sapiens OX=9606 GN=USP38 PE=1 SV=2
OG0006604	sp|Q58715|Y1319_METJA Uncharacterized sodium-dependent transporter MJ1319 OS=Methanocaldococcus jannaschii (strain ATCC 43067 / DSM 2661 / JAL-1 / JCM 10045 / NBRC 100440) OX=243232 GN=MJ1319 PE=3 SV=1
OG0006687
OG0006702	sp|Q5HZI9|S2551_MOUSE Solute carrier family 25 member 51 OS=Mus musculus OX=10090 GN=Slc25a51 PE=1 SV=1
OG0006704	sp|F4HSX9|KLCR3_ARATH Protein KINESIN LIGHT CHAIN-RELATED 3 OS=Arabidopsis thaliana OX=3702 GN=KLCR3 PE=2 SV=1
OG0006724	sp|Q3T0Z8|RUXF_BOVIN Small nuclear ribonucleoprotein F OS=Bos taurus OX=9913 GN=SNRPF PE=3 SV=2
OG0006749	sp|Q9PVV4|PCM1_XENLA Pericentriolar material 1 protein OS=Xenopus laevis OX=8355 GN=pcm1 PE=1 SV=1
OG0006801	sp|Q9NYG2|ZDHC3_HUMAN Palmitoyltransferase ZDHHC3 OS=Homo sapiens OX=9606 GN=ZDHHC3 PE=1 SV=2
OG0006826	sp|Q6ZPK0|PF21A_MOUSE PHD finger protein 21A OS=Mus musculus OX=10090 GN=Phf21a PE=1 SV=3
OG0006872	sp|B0XK69|SDHF2_CULQU Succinate dehydrogenase assembly factor 2, mitochondrial OS=Culex quinquefasciatus OX=7176 GN=CPIJ019830 PE=3 SV=1
OG0006884	sp|Q10002|APN1_CAEEL Apurinic-apyrimidinic endonuclease OS=Caenorhabditis elegans OX=6239 GN=apn-1 PE=2 SV=2
OG0006892	sp|Q6PDY2|AEDO_MOUSE 2-aminoethanethiol dioxygenase OS=Mus musculus OX=10090 GN=Ado PE=1 SV=2
OG0006899	sp|Q0P5K3|UBE2N_BOVIN Ubiquitin-conjugating enzyme E2 N OS=Bos taurus OX=9913 GN=UBE2N PE=2 SV=1
OG0006900	sp|Q3KRG3|TSR2_DANRE Pre-rRNA-processing protein TSR2 homolog OS=Danio rerio OX=7955 GN=tsr2 PE=2 SV=1
OG0006905	sp|Q9R1W3|RN103_MOUSE E3 ubiquitin-protein ligase RNF103 OS=Mus musculus OX=10090 GN=Rnf103 PE=2 SV=2
OG0006911	sp|C3XR70|ENOPH_BRAFL Enolase-phosphatase E1 OS=Branchiostoma floridae OX=7739 GN=BRAFLDRAFT_73099 PE=3 SV=1
OG0006923	sp|Q9JLH6|CK5P1_RAT Mitochondrial tRNA methylthiotransferase CDK5RAP1 OS=Rattus norvegicus OX=10116 GN=Cdk5rap1 PE=1 SV=1
OG0006974	sp|Q5R486|PNMA2_PONAB Paraneoplastic antigen Ma2 homolog OS=Pongo abelii OX=9601 GN=PNMA2 PE=2 SV=1
OG0006979
OG0006981	sp|Q7Z0T3|TEMPT_APLCA Temptin OS=Aplysia californica OX=6500 PE=1 SV=1
OG0007008	sp|P41383|TBA2_PATVU Tubulin alpha-2/alpha-4 chain OS=Patella vulgata OX=6465 GN=TUB2 PE=2 SV=1
OG0007013	sp|P10978|POLX_TOBAC Retrovirus-related Pol polyprotein from transposon TNT 1-94 OS=Nicotiana tabacum OX=4097 PE=2 SV=1
OG0007034
OG0007087
OG0007090	sp|Q9UIM3|FKBPL_HUMAN FK506-binding protein-like OS=Homo sapiens OX=9606 GN=FKBPL PE=1 SV=1
OG0007091	sp|A6H793|LRRC3_BOVIN Leucine-rich repeat-containing protein 3 OS=Bos taurus OX=9913 GN=LRRC3 PE=2 SV=1
OG0007153	sp|Q5ZID2|PDD2L_CHICK Programmed cell death protein 2-like OS=Gallus gallus OX=9031 GN=PDCD2L PE=2 SV=1
OG0007192	sp|Q0IIH8|MINY3_BOVIN Ubiquitin carboxyl-terminal hydrolase MINDY-3 OS=Bos taurus OX=9913 GN=MINDY3 PE=2 SV=1
OG0007201	sp|Q9NA64|ILCR1_CAEEL Interleukin cytokine receptor-related protein 1 OS=Caenorhabditis elegans OX=6239 GN=ilcr-1 PE=1 SV=1
OG0007215	sp|Q95V84|RL38_BRABE 60S ribosomal protein L38 OS=Branchiostoma belcheri OX=7741 GN=RPL38 PE=3 SV=1
OG0007218	sp|Q4R5T4|RNF32_MACFA RING finger protein 32 OS=Macaca fascicularis OX=9541 GN=RNF32 PE=2 SV=1
OG0007220	sp|A6QQL9|SRP14_BOVIN Signal recognition particle 14 kDa protein OS=Bos taurus OX=9913 GN=SRP14 PE=3 SV=1
OG0007291	sp|Q9VMU4|RL37A_DROME 60S ribosomal protein L37a OS=Drosophila melanogaster OX=7227 GN=RpL37A PE=1 SV=3
OG0007294	sp|Q9NZV1|CRIM1_HUMAN Cysteine-rich motor neuron 1 protein OS=Homo sapiens OX=9606 GN=CRIM1 PE=1 SV=1
OG0007313	sp|O55057|PDE6D_MOUSE Retinal rod rhodopsin-sensitive cGMP 3',5'-cyclic phosphodiesterase subunit delta OS=Mus musculus OX=10090 GN=Pde6d PE=1 SV=1
OG0007323	sp|P62312|LSM6_HUMAN U6 snRNA-associated Sm-like protein LSm6 OS=Homo sapiens OX=9606 GN=LSM6 PE=1 SV=1
OG0007366	sp|Q8K194|SNR27_MOUSE U4/U6.U5 small nuclear ribonucleoprotein 27 kDa protein OS=Mus musculus OX=10090 GN=Snrnp27 PE=1 SV=1
OG0007369	sp|Q4L235|ACSF4_HUMAN Beta-alanine-activating enzyme OS=Homo sapiens OX=9606 GN=AASDH PE=1 SV=3
OG0007376	sp|P61356|RL27_BOVIN 60S ribosomal protein L27 OS=Bos taurus OX=9913 GN=RPL27 PE=2 SV=2
OG0007414	sp|P14942|GSTA4_RAT Glutathione S-transferase alpha-4 OS=Rattus norvegicus OX=10116 GN=Gsta4 PE=1 SV=2
OG0007420	sp|Q9QXG4|ACSA_MOUSE Acetyl-coenzyme A synthetase, cytoplasmic OS=Mus musculus OX=10090 GN=Acss2 PE=1 SV=2
OG0007464	sp|Q2HJ57|COTL1_BOVIN Coactosin-like protein OS=Bos taurus OX=9913 GN=COTL1 PE=2 SV=3
OG0007471	sp|Q6DGJ3|TIM13_DANRE Mitochondrial import inner membrane translocase subunit Tim13 OS=Danio rerio OX=7955 GN=timm13 PE=3 SV=1
OG0007486	sp|P42620|YQJG_ECOLI Glutathionyl-hydroquinone reductase YqjG OS=Escherichia coli (strain K12) OX=83333 GN=yqjG PE=1 SV=1
OG0007494	sp|Q32P78|RPAB5_BOVIN DNA-directed RNA polymerases I, II, and III subunit RPABC5 OS=Bos taurus OX=9913 GN=POLR2L PE=1 SV=1
OG0007502	sp|Q6PC30|CSN5_DANRE COP9 signalosome complex subunit 5 OS=Danio rerio OX=7955 GN=cops5 PE=2 SV=1
OG0007504	sp|Q98967|CYT_ONCKE Cystatin OS=Oncorhynchus keta OX=8018 PE=1 SV=2
OG0007517	sp|Q8JHF0|PEN2_DANRE Gamma-secretase subunit PEN-2 OS=Danio rerio OX=7955 GN=psenen PE=3 SV=1
OG0007565	sp|Q5VY09|IER5_HUMAN Immediate early response gene 5 protein OS=Homo sapiens OX=9606 GN=IER5 PE=1 SV=3
OG0007572	sp|Q91755|GRIK2_XENLA Glutamate receptor ionotropic, kainate 2 OS=Xenopus laevis OX=8355 GN=grik2 PE=2 SV=2
OG0007573	sp|Q9UK76|JUPI1_HUMAN Jupiter microtubule associated homolog 1 OS=Homo sapiens OX=9606 GN=JPT1 PE=1 SV=3
OG0007581	sp|Q22328|LEV9_CAEEL Protein lev-9 OS=Caenorhabditis elegans OX=6239 GN=lev-9 PE=1 SV=3
OG0007582	sp|Q16515|ASIC2_HUMAN Acid-sensing ion channel 2 OS=Homo sapiens OX=9606 GN=ASIC2 PE=1 SV=1
OG0007586	sp|Q96HI0|SENP5_HUMAN Sentrin-specific protease 5 OS=Homo sapiens OX=9606 GN=SENP5 PE=1 SV=3
OG0007593
OG0007627
OG0007640	sp|Q6DF94|SPICE_XENLA Spindle and centriole-associated protein 1 OS=Xenopus laevis OX=8355 GN=spice1 PE=2 SV=1
OG0007648	sp|Q90YK3|GGLO_SCYTO L-gulonolactone oxidase OS=Scyliorhinus torazame OX=75743 GN=GULO PE=2 SV=1
OG0007660	sp|Q9VGQ9|DPH3_DROME DPH3 homolog OS=Drosophila melanogaster OX=7227 GN=CG14701 PE=3 SV=1
OG0007671	sp|Q9NQV8|PRDM8_HUMAN PR domain zinc finger protein 8 OS=Homo sapiens OX=9606 GN=PRDM8 PE=1 SV=3
OG0007679	sp|Q5R4F8|C42S2_PONAB CDC42 small effector protein 2 OS=Pongo abelii OX=9601 GN=CDC42SE2 PE=3 SV=1
OG0007683	sp|Q06561|UNC52_CAEEL Basement membrane proteoglycan OS=Caenorhabditis elegans OX=6239 GN=unc-52 PE=1 SV=2
OG0007686	sp|Q13158|FADD_HUMAN FAS-associated death domain protein OS=Homo sapiens OX=9606 GN=FADD PE=1 SV=1
OG0007695	sp|Q14527|HLTF_HUMAN Helicase-like transcription factor OS=Homo sapiens OX=9606 GN=HLTF PE=1 SV=2
OG0007707	sp|O93530|WRN_XENLA Werner syndrome ATP-dependent helicase homolog OS=Xenopus laevis OX=8355 GN=wrn PE=2 SV=1
OG0007733	sp|Q64433|CH10_MOUSE 10 kDa heat shock protein, mitochondrial OS=Mus musculus OX=10090 GN=Hspe1 PE=1 SV=2
OG0007734	sp|Q96CD2|COAC_HUMAN Phosphopantothenoylcysteine decarboxylase OS=Homo sapiens OX=9606 GN=PPCDC PE=1 SV=2
OG0007741	sp|Q9ULR5|PAI2B_HUMAN Polyadenylate-binding protein-interacting protein 2B OS=Homo sapiens OX=9606 GN=PAIP2B PE=1 SV=2
OG0007744	sp|Q9Y333|LSM2_HUMAN U6 snRNA-associated Sm-like protein LSm2 OS=Homo sapiens OX=9606 GN=LSM2 PE=1 SV=1
OG0007758	sp|P35187|SGS1_YEAST ATP-dependent helicase SGS1 OS=Saccharomyces cerevisiae (strain ATCC 204508 / S288c) OX=559292 GN=SGS1 PE=1 SV=1
OG0007762	sp|Q96T23|RSF1_HUMAN Remodeling and spacing factor 1 OS=Homo sapiens OX=9606 GN=RSF1 PE=1 SV=2
OG0007792	sp|Q9PTH3|IBP2A_DANRE Insulin-like growth factor-binding protein 2-A OS=Danio rerio OX=7955 GN=igfbp2a PE=1 SV=1
OG0007816	sp|Q9NVA4|T184C_HUMAN Transmembrane protein 184C OS=Homo sapiens OX=9606 GN=TMEM184C PE=1 SV=2
OG0007818	sp|Q7Z0Q2|RNKB_CERCA Ribonuclease kappa-B OS=Ceratitis capitata OX=7213 PE=3 SV=1
OG0007824	sp|P80585|TBCA_CHICK Tubulin-specific chaperone A OS=Gallus gallus OX=9031 GN=TBCA PE=1 SV=2
OG0007834	sp|Q8N961|ABTB2_HUMAN Ankyrin repeat and BTB/POZ domain-containing protein 2 OS=Homo sapiens OX=9606 GN=ABTB2 PE=2 SV=2
OG0007835	sp|P48053|YPD1_CAEEL Uncharacterized protein C05D11.1 OS=Caenorhabditis elegans OX=6239 GN=C05D11.1 PE=4 SV=2
OG0007836	sp|Q9CQR2|RS21_MOUSE 40S ribosomal protein S21 OS=Mus musculus OX=10090 GN=Rps21 PE=1 SV=1
OG0007857	sp|Q32PE9|LSM3_BOVIN U6 snRNA-associated Sm-like protein LSm3 OS=Bos taurus OX=9913 GN=LSM3 PE=3 SV=3
OG0007881	sp|Q9D119|PPR27_MOUSE Protein phosphatase 1 regulatory subunit 27 OS=Mus musculus OX=10090 GN=Ppp1r27 PE=2 SV=1
OG0007898	sp|Q642H2|CRBL2_DANRE cAMP-responsive element-binding protein-like 2 OS=Danio rerio OX=7955 GN=crebl2 PE=3 SV=1
OG0007904	sp|Q149F1|RUSD2_MOUSE RNA pseudouridylate synthase domain-containing protein 2 OS=Mus musculus OX=10090 GN=Rpusd2 PE=1 SV=2
OG0007909	sp|E1C2Z0|MMS22_CHICK Protein MMS22-like OS=Gallus gallus OX=9031 GN=MMS22L PE=3 SV=1
OG0007932	sp|Q8ISN9|RS25_BRABE 40S ribosomal protein S25 OS=Branchiostoma belcheri OX=7741 GN=RPS25 PE=2 SV=1
OG0007942	sp|Q54KD0|Y7407_DICDI TPR repeat-containing protein DDB_G0287407 OS=Dictyostelium discoideum OX=44689 GN=DDB_G0287407 PE=4 SV=1
OG0007947	sp|Q0MQA3|NDUA6_PONPY NADH dehydrogenase [ubiquinone] 1 alpha subcomplex subunit 6 OS=Pongo pygmaeus OX=9600 GN=NDUFA6 PE=2 SV=3
OG0007967	sp|Q504Y2|PKDCC_HUMAN Extracellular tyrosine-protein kinase PKDCC OS=Homo sapiens OX=9606 GN=PKDCC PE=2 SV=2
OG0007983	sp|P62869|ELOB_MOUSE Elongin-B OS=Mus musculus OX=10090 GN=Elob PE=1 SV=1
OG0007984	sp|Q4KM79|DUS11_RAT RNA/RNP complex-1-interacting phosphatase OS=Rattus norvegicus OX=10116 GN=Dusp11 PE=2 SV=1
OG0008011	sp|Q5XPI4|RN123_HUMAN E3 ubiquitin-protein ligase RNF123 OS=Homo sapiens OX=9606 GN=RNF123 PE=1 SV=1
OG0008017	sp|Q9LU92|TGT4_ARATH Trihelix transcription factor GT-4 OS=Arabidopsis thaliana OX=3702 GN=GT-4 PE=2 SV=1
OG0008024	sp|Q03188|CENPC_HUMAN Centromere protein C OS=Homo sapiens OX=9606 GN=CENPC PE=1 SV=2
OG0008027	sp|A8HAL1|UBP16_DANRE Ubiquitin carboxyl-terminal hydrolase 16 OS=Danio rerio OX=7955 GN=usp16 PE=3 SV=1
OG0008032	sp|Q9NBX4|RTXE_DROME Probable RNA-directed DNA polymerase from transposon X-element OS=Drosophila melanogaster OX=7227 GN=X-element\ORF2 PE=3 SV=1
OG0008036	sp|Q9SZL8|FRS5_ARATH Protein FAR1-RELATED SEQUENCE 5 OS=Arabidopsis thaliana OX=3702 GN=FRS5 PE=1 SV=1
OG0008053	sp|Q6ZNI0|GCNT7_HUMAN Beta-1,3-galactosyl-O-glycosyl-glycoprotein beta-1,6-N-acetylglucosaminyltransferase 7 OS=Homo sapiens OX=9606 GN=GCNT7 PE=2 SV=2
OG0008054	sp|Q6R2W3|SCND3_HUMAN SCAN domain-containing protein 3 OS=Homo sapiens OX=9606 GN=ZBED9 PE=2 SV=1
OG0008056
OG0008062
OG0008092	sp|Q62425|NDUA4_MOUSE Cytochrome c oxidase subunit NDUFA4 OS=Mus musculus OX=10090 GN=Ndufa4 PE=1 SV=2
OG0008116	sp|P21328|RTJK_DROME RNA-directed DNA polymerase from mobile element jockey OS=Drosophila melanogaster OX=7227 GN=pol PE=1 SV=1
OG0008117	sp|P21328|RTJK_DROME RNA-directed DNA polymerase from mobile element jockey OS=Drosophila melanogaster OX=7227 GN=pol PE=1 SV=1
OG0008130
OG0008140	sp|Q9NRS4|TMPS4_HUMAN Transmembrane protease serine 4 OS=Homo sapiens OX=9606 GN=TMPRSS4 PE=1 SV=2
OG0008153	sp|Q6NXN1|SZRD1_MOUSE SUZ domain-containing protein 1 OS=Mus musculus OX=10090 GN=Szrd1 PE=1 SV=1
OG0008154	sp|Q0IIF0|ILKAP_BOVIN Integrin-linked kinase-associated serine/threonine phosphatase 2C OS=Bos taurus OX=9913 GN=ILKAP PE=2 SV=1
OG0008156	sp|Q9Y573|IPP_HUMAN Actin-binding protein IPP OS=Homo sapiens OX=9606 GN=IPP PE=1 SV=1
OG0008171	sp|Q03274|PO22_POPJA Retrovirus-related Pol polyprotein from type-1 retrotransposable element R2 (Fragment) OS=Popillia japonica OX=7064 PE=4 SV=1
OG0008282	sp|Q99549|MPP8_HUMAN M-phase phosphoprotein 8 OS=Homo sapiens OX=9606 GN=MPHOSPH8 PE=1 SV=2
OG0008292	sp|Q68W49|Y683_RICTY Uncharacterized protein RT0683 OS=Rickettsia typhi (strain ATCC VR-144 / Wilmington) OX=257363 GN=RT0683 PE=3 SV=1
OG0008300	sp|Q9EPU0|RENT1_MOUSE Regulator of nonsense transcripts 1 OS=Mus musculus OX=10090 GN=Upf1 PE=1 SV=2
OG0008308	sp|Q3ZCE0|LSM8_BOVIN U6 snRNA-associated Sm-like protein LSm8 OS=Bos taurus OX=9913 GN=LSM8 PE=3 SV=3
OG0008318	sp|Q99LJ2|ABTB1_MOUSE Ankyrin repeat and BTB/POZ domain-containing protein 1 OS=Mus musculus OX=10090 GN=Abtb1 PE=2 SV=1
OG0008330	sp|Q96KF7|SMIM8_HUMAN Small integral membrane protein 8 OS=Homo sapiens OX=9606 GN=SMIM8 PE=1 SV=2
OG0008335	sp|Q5TJE6|PFD6_CANLF Prefoldin subunit 6 OS=Canis lupus familiaris OX=9615 GN=PFDN6 PE=3 SV=1
OG0008345	sp|Q5BJS9|MORN4_RAT MORN repeat-containing protein 4 OS=Rattus norvegicus OX=10116 GN=Morn4 PE=2 SV=1
OG0008354	sp|A6H619|PHRF1_MOUSE PHD and RING finger domain-containing protein 1 OS=Mus musculus OX=10090 GN=Phrf1 PE=1 SV=2
OG0008356	sp|Q7L0Q8|RHOU_HUMAN Rho-related GTP-binding protein RhoU OS=Homo sapiens OX=9606 GN=RHOU PE=1 SV=1
OG0008369	sp|P96576|YDAC_BACSU Uncharacterized methyltransferase YdaC OS=Bacillus subtilis (strain 168) OX=224308 GN=ydaC PE=3 SV=1
OG0008402	sp|Q0VFD6|MZT1_XENTR Mitotic-spindle organizing protein 1 OS=Xenopus tropicalis OX=8364 GN=mzt1 PE=3 SV=1
OG0008407	sp|Q2NKU6|DPY30_BOVIN Protein dpy-30 homolog OS=Bos taurus OX=9913 GN=DPY30 PE=3 SV=1
OG0008419	sp|Q8JZS9|RM48_MOUSE 39S ribosomal protein L48, mitochondrial OS=Mus musculus OX=10090 GN=Mrpl48 PE=1 SV=1
OG0008421	sp|Q7ZXY0|INO1A_XENLA Inositol-3-phosphate synthase 1-A OS=Xenopus laevis OX=8355 GN=isyna1-a PE=2 SV=1
OG0008428
OG0008430	sp|Q7TSH2|KPBB_MOUSE Phosphorylase b kinase regulatory subunit beta OS=Mus musculus OX=10090 GN=Phkb PE=1 SV=1
OG0008432	sp|Q9VGG5|CAD87_DROME Cadherin-87A OS=Drosophila melanogaster OX=7227 GN=Cad87A PE=1 SV=4
OG0008434
OG0008442	sp|Q8I7P9|POL5_DROME Retrovirus-related Pol polyprotein from transposon opus OS=Drosophila melanogaster OX=7227 GN=pol PE=4 SV=1
OG0008445	sp|A7YSY2|SPA5L_BOVIN Spermatogenesis-associated protein 5-like protein 1 OS=Bos taurus OX=9913 GN=SPATA5L1 PE=2 SV=1
OG0008459
OG0008464	sp|Q1LUV9|M1I1B_DANRE Mid1-interacting protein 1-B OS=Danio rerio OX=7955 GN=mid1ip1b PE=2 SV=1
OG0008467
OG0008475	sp|Q93126|GPR9_AMPAM Probable G-protein coupled receptor No9 OS=Amphibalanus amphitrite OX=1232801 PE=3 SV=1
OG0008476	sp|Q9HAR2|AGRL3_HUMAN Adhesion G protein-coupled receptor L3 OS=Homo sapiens OX=9606 GN=ADGRL3 PE=1 SV=2
OG0008480	sp|Q09575|YRD6_CAEEL Uncharacterized protein K02A2.6 OS=Caenorhabditis elegans OX=6239 GN=K02A2.6 PE=4 SV=1
OG0008482	sp|Q9EQQ3|GPR63_MOUSE Probable G-protein coupled receptor 63 OS=Mus musculus OX=10090 GN=Gpr63 PE=2 SV=2
OG0008486	sp|Q9VS29|DSCL_DROME Down syndrome cell adhesion molecule-like protein Dscam2 OS=Drosophila melanogaster OX=7227 GN=Dscam2 PE=2 SV=3
OG0008487	sp|Q6NT16|S18B1_HUMAN MFS-type transporter SLC18B1 OS=Homo sapiens OX=9606 GN=SLC18B1 PE=1 SV=1
OG0008488	sp|Q8NCJ5|SPRY3_HUMAN SPRY domain-containing protein 3 OS=Homo sapiens OX=9606 GN=SPRYD3 PE=1 SV=2
OG0008490	sp|Q80TI0|ASTRB_MOUSE Protein Aster-B OS=Mus musculus OX=10090 GN=Gramd1b PE=1 SV=2
OG0008491
OG0008494	sp|P08770|TRA1_MAIZE Putative AC transposase OS=Zea mays OX=4577 PE=2 SV=2
OG0008501
OG0008506	sp|Q91DM0|POLG_PVCV1 Genome polyprotein OS=Petunia vein clearing virus (isolate Shepherd) OX=492094 PE=3 SV=1
OG0008531	sp|Q15800|MSMO1_HUMAN Methylsterol monooxygenase 1 OS=Homo sapiens OX=9606 GN=MSMO1 PE=1 SV=1
OG0008534	sp|Q3T104|SC61G_BOVIN Protein transport protein Sec61 subunit gamma OS=Bos taurus OX=9913 GN=SEC61G PE=3 SV=1
OG0008541	sp|Q5RGA4|MYSM1_DANRE Histone H2A deubiquitinase MYSM1 OS=Danio rerio OX=7955 GN=mysm1 PE=2 SV=2
OG0008554	sp|Q69ZN7|MYOF_MOUSE Myoferlin OS=Mus musculus OX=10090 GN=Myof PE=1 SV=2
OG0008557	sp|Q9IB75|PGS1_XENLA Biglycan OS=Xenopus laevis OX=8355 GN=bgn PE=2 SV=1
OG0008577	sp|Q8WUR0|CS012_MOUSE Protein C19orf12 homolog OS=Mus musculus OX=10090 PE=1 SV=1
OG0008579	sp|Q9VHI4|SF3B5_DROME Splicing factor 3B subunit 5 OS=Drosophila melanogaster OX=7227 GN=Sf3b5 PE=1 SV=1
OG0008582	sp|Q0P5C2|MTDC_BOVIN Bifunctional methylenetetrahydrofolate dehydrogenase/cyclohydrolase, mitochondrial OS=Bos taurus OX=9913 GN=MTHFD2 PE=2 SV=1
OG0008587	sp|O95563|MPC2_HUMAN Mitochondrial pyruvate carrier 2 OS=Homo sapiens OX=9606 GN=MPC2 PE=1 SV=1
OG0008613	sp|Q90600|RB_CHICK Retinoblastoma-associated protein OS=Gallus gallus OX=9031 GN=RB1 PE=1 SV=1
OG0008629	sp|Q9BYV6|TRI55_HUMAN Tripartite motif-containing protein 55 OS=Homo sapiens OX=9606 GN=TRIM55 PE=1 SV=2
OG0008644	sp|P49842|STK19_HUMAN Serine/threonine-protein kinase 19 OS=Homo sapiens OX=9606 GN=STK19 PE=1 SV=2
OG0008647	sp|Q28CQ7|SUV92_XENTR Histone-lysine N-methyltransferase SUV39H2 OS=Xenopus tropicalis OX=8364 GN=suv39h2 PE=2 SV=2
OG0008652	sp|Q2TA46|UBL3_BOVIN Ubiquitin-like protein 3 OS=Bos taurus OX=9913 GN=UBL3 PE=3 SV=1
OG0008686	sp|Q2KIB5|VA0E2_BOVIN V-type proton ATPase subunit e 2 OS=Bos taurus OX=9913 GN=ATP6V0E2 PE=3 SV=1
OG0008691	sp|Q6NT99|DUS23_MOUSE Dual specificity protein phosphatase 23 OS=Mus musculus OX=10090 GN=Dusp23 PE=1 SV=1
OG0008703	sp|Q6GPW4|TM205_XENLA Transmembrane protein 205 OS=Xenopus laevis OX=8355 GN=tmem205 PE=2 SV=1
OG0008705	sp|Q5BK22|GTPB8_RAT GTP-binding protein 8 OS=Rattus norvegicus OX=10116 GN=Gtpbp8 PE=2 SV=1
OG0008706	sp|Q5TGZ0|MIC10_HUMAN MICOS complex subunit MIC10 OS=Homo sapiens OX=9606 GN=MICOS10 PE=1 SV=1
OG0008712	sp|Q9UNH7|SNX6_HUMAN Sorting nexin-6 OS=Homo sapiens OX=9606 GN=SNX6 PE=1 SV=1
OG0008718	sp|Q5T2D3|OTUD3_HUMAN OTU domain-containing protein 3 OS=Homo sapiens OX=9606 GN=OTUD3 PE=1 SV=1
OG0008721	sp|Q8N4L8|CCD24_HUMAN Coiled-coil domain-containing protein 24 OS=Homo sapiens OX=9606 GN=CCDC24 PE=1 SV=1
OG0008723	sp|Q9CQ69|QCR8_MOUSE Cytochrome b-c1 complex subunit 8 OS=Mus musculus OX=10090 GN=Uqcrq PE=1 SV=3
OG0008728	sp|P37268|FDFT_HUMAN Squalene synthase OS=Homo sapiens OX=9606 GN=FDFT1 PE=1 SV=1
OG0008736
OG0008740	sp|Q9MA55|ACBP4_ARATH Acyl-CoA-binding domain-containing protein 4 OS=Arabidopsis thaliana OX=3702 GN=ACBP4 PE=1 SV=1
OG0008754	sp|Q9ULC3|RAB23_HUMAN Ras-related protein Rab-23 OS=Homo sapiens OX=9606 GN=RAB23 PE=1 SV=1
OG0008771	sp|Q7RTT9|S29A4_HUMAN Equilibrative nucleoside transporter 4 OS=Homo sapiens OX=9606 GN=SLC29A4 PE=1 SV=1
OG0008787	sp|Q05B56|TF2H3_BOVIN General transcription factor IIH subunit 3 OS=Bos taurus OX=9913 GN=GTF2H3 PE=2 SV=1
OG0008792	sp|Q4QR03|MD31A_XENLA Mediator of RNA polymerase II transcription subunit 31-A OS=Xenopus laevis OX=8355 GN=med31-a PE=2 SV=2
OG0008794	sp|Q1RMP0|RPA12_BOVIN DNA-directed RNA polymerase I subunit RPA12 OS=Bos taurus OX=9913 GN=POLR1H PE=2 SV=1
OG0008802	sp|Q9H222|ABCG5_HUMAN ATP-binding cassette sub-family G member 5 OS=Homo sapiens OX=9606 GN=ABCG5 PE=1 SV=1
OG0008820	sp|A0A0R4IBK5|R213A_DANRE E3 ubiquitin-protein ligase rnf213-alpha OS=Danio rerio OX=7955 GN=rnf213a PE=3 SV=1
OG0008828	sp|Q96LD8|SENP8_HUMAN Sentrin-specific protease 8 OS=Homo sapiens OX=9606 GN=SENP8 PE=1 SV=1
OG0008836	sp|Q9H5L6|THAP9_HUMAN DNA transposase THAP9 OS=Homo sapiens OX=9606 GN=THAP9 PE=1 SV=2
OG0008838	sp|Q7T2Q0|SLB_ECHML Snaclec EMS16 subunit beta OS=Echis multisquamatus OX=93050 PE=1 SV=1
OG0008839	sp|P05552|ADF1_DROME Transcription factor Adf-1 OS=Drosophila melanogaster OX=7227 GN=Adf1 PE=2 SV=2
OG0008846	sp|Q9VCA2|ORCT_DROME Organic cation transporter protein OS=Drosophila melanogaster OX=7227 GN=Orct PE=1 SV=1
OG0008849	sp|Q9VXE0|RUXG_DROME Probable small nuclear ribonucleoprotein G OS=Drosophila melanogaster OX=7227 GN=SNRPG PE=1 SV=1
OG0008855
OG0008864	sp|P12258|HOBOT_DROME Transposable element Hobo transposase OS=Drosophila melanogaster OX=7227 GN=T PE=4 SV=1
OG0008865	sp|Q9JLB4|CUBN_MOUSE Cubilin OS=Mus musculus OX=10090 GN=Cubn PE=1 SV=3
OG0008866	sp|Q7YQM3|ATRX_PONPY Transcriptional regulator ATRX OS=Pongo pygmaeus OX=9600 GN=ATRX PE=2 SV=1
OG0008877
OG0008884	sp|Q8K2I9|FBH1_MOUSE F-box DNA helicase 1 OS=Mus musculus OX=10090 GN=Fbh1 PE=1 SV=1
OG0008925	sp|Q29RV0|CDN2D_BOVIN Cyclin-dependent kinase 4 inhibitor D OS=Bos taurus OX=9913 GN=CDKN2D PE=2 SV=1
OG0008935	sp|Q76LT9|TM258_CHICK Transmembrane protein 258 OS=Gallus gallus OX=9031 GN=TMEM258 PE=3 SV=1
OG0008938	sp|Q14332|FZD2_HUMAN Frizzled-2 OS=Homo sapiens OX=9606 GN=FZD2 PE=1 SV=1
OG0008945	sp|Q9BYD2|RM09_HUMAN 39S ribosomal protein L9, mitochondrial OS=Homo sapiens OX=9606 GN=MRPL9 PE=1 SV=2
OG0008961	sp|A4IG66|TM201_DANRE Transmembrane protein 201 OS=Danio rerio OX=7955 GN=tmem201 PE=2 SV=1
OG0008964
OG0008968	sp|A4IGH2|RSAD1_DANRE Radical S-adenosyl methionine domain-containing protein 1, mitochondrial OS=Danio rerio OX=7955 GN=rsad1 PE=2 SV=1
OG0008978	sp|Q2HJH0|LSM5_BOVIN U6 snRNA-associated Sm-like protein LSm5 OS=Bos taurus OX=9913 GN=LSM5 PE=3 SV=3
OG0008984	sp|B5FXA0|ETFR1_TAEGU Electron transfer flavoprotein regulatory factor 1 OS=Taeniopygia guttata OX=59729 GN=etfrf1 PE=3 SV=1
OG0008993	sp|Q3LRP1|TNR5_CALJA Tumor necrosis factor receptor superfamily member 5 OS=Callithrix jacchus OX=9483 GN=CD40 PE=2 SV=1
OG0009011	sp|Q9BV81|EMC6_HUMAN ER membrane protein complex subunit 6 OS=Homo sapiens OX=9606 GN=EMC6 PE=1 SV=1
OG0009013	sp|Q08BG7|SCOCA_DANRE Short coiled-coil protein A OS=Danio rerio OX=7955 GN=scoca PE=3 SV=1
OG0009014	sp|Q32L99|PTGR2_BOVIN Prostaglandin reductase 2 OS=Bos taurus OX=9913 GN=PTGR2 PE=2 SV=1
OG0009024	sp|Q8VI56|LRP4_MOUSE Low-density lipoprotein receptor-related protein 4 OS=Mus musculus OX=10090 GN=Lrp4 PE=1 SV=3
OG0009028	sp|Q9CSV6|SFT2C_MOUSE Vesicle transport protein SFT2C OS=Mus musculus OX=10090 GN=Sft2d3 PE=1 SV=3
OG0009037	sp|Q6GQ52|TI10B_XENLA Mitochondrial import inner membrane translocase subunit Tim10-B OS=Xenopus laevis OX=8355 GN=timm10-b PE=3 SV=1
OG0009042	sp|Q9D8P7|TF3C6_MOUSE General transcription factor 3C polypeptide 6 OS=Mus musculus OX=10090 GN=Gtf3c6 PE=2 SV=1
OG0009044	sp|Q5ZLL0|VMA21_CHICK Vacuolar ATPase assembly integral membrane protein VMA21 OS=Gallus gallus OX=9031 GN=VMA21 PE=3 SV=1
OG0009059	sp|A7SMR0|MEIG1_NEMVE Meiosis expressed gene 1 protein homolog OS=Nematostella vectensis OX=45351 GN=v1g237368 PE=3 SV=1
OG0009072	sp|A2AVA0|SVEP1_MOUSE Sushi, von Willebrand factor type A, EGF and pentraxin domain-containing protein 1 OS=Mus musculus OX=10090 GN=Svep1 PE=1 SV=1
OG0009076	sp|Q6NRI8|CENPS_XENLA Centromere protein S OS=Xenopus laevis OX=8355 GN=cenps PE=2 SV=1
OG0009091	sp|P79781|RS27A_CHICK Ubiquitin-40S ribosomal protein S27a OS=Gallus gallus OX=9031 GN=RPS27A PE=2 SV=3
OG0009101	sp|P34642|SRP09_CAEEL Signal recognition particle 9 kDa protein OS=Caenorhabditis elegans OX=6239 GN=ZK512.4 PE=3 SV=1
OG0009106	sp|Q8VDC1|FYCO1_MOUSE FYVE and coiled-coil domain-containing protein 1 OS=Mus musculus OX=10090 GN=Fyco1 PE=1 SV=1
OG0009113	sp|Q0II70|MCRI2_BOVIN MAPK regulated corepressor interacting protein 2 OS=Bos taurus OX=9913 GN=MCRIP2 PE=2 SV=1
OG0009117	sp|Q8R034|APC13_MOUSE Anaphase-promoting complex subunit 13 OS=Mus musculus OX=10090 GN=Anapc13 PE=3 SV=1
OG0009126	sp|Q3SX24|FBX6_BOVIN F-box only protein 6 OS=Bos taurus OX=9913 GN=FBXO6 PE=2 SV=1
OG0009127	sp|Q9H3K6|BOLA2_HUMAN BolA-like protein 2 OS=Homo sapiens OX=9606 GN=BOLA2 PE=1 SV=1
OG0009153	sp|Q5ZLP2|MTNB_CHICK Methylthioribulose-1-phosphate dehydratase OS=Gallus gallus OX=9031 GN=APIP PE=2 SV=1
OG0009157	sp|Q4JL91|IPPK_DANRE Inositol-pentakisphosphate 2-kinase OS=Danio rerio OX=7955 GN=ippk PE=1 SV=3
OG0009158	sp|Q8NFZ3|NLGNY_HUMAN Neuroligin-4, Y-linked OS=Homo sapiens OX=9606 GN=NLGN4Y PE=2 SV=1
OG0009167	sp|Q9PTS8|ACHA9_CHICK Neuronal acetylcholine receptor subunit alpha-9 OS=Gallus gallus OX=9031 GN=CHRNA9 PE=1 SV=1
OG0009175	sp|Q9BSL1|UBAC1_HUMAN Ubiquitin-associated domain-containing protein 1 OS=Homo sapiens OX=9606 GN=UBAC1 PE=1 SV=1
OG0009176	sp|Q99590|SCAFB_HUMAN Protein SCAF11 OS=Homo sapiens OX=9606 GN=SCAF11 PE=1 SV=2
OG0009180	sp|O77633|ADA10_PIG Disintegrin and metalloproteinase domain-containing protein 10 OS=Sus scrofa OX=9823 GN=ADAM10 PE=2 SV=2
OG0009197
OG0009199	sp|Q8N1W2|ZN710_HUMAN Zinc finger protein 710 OS=Homo sapiens OX=9606 GN=ZNF710 PE=1 SV=2
OG0009202	sp|Q04756|HGFA_HUMAN Hepatocyte growth factor activator OS=Homo sapiens OX=9606 GN=HGFAC PE=1 SV=1
OG0009211	sp|Q9P218|COKA1_HUMAN Collagen alpha-1(XX) chain OS=Homo sapiens OX=9606 GN=COL20A1 PE=1 SV=4
OG0009213	sp|P59808|SASH1_MOUSE SAM and SH3 domain-containing protein 1 OS=Mus musculus OX=10090 GN=Sash1 PE=1 SV=1
OG0009214
OG0009217	sp|P08793|XDH_CALVI Xanthine dehydrogenase OS=Calliphora vicina OX=7373 GN=XDH PE=2 SV=1
OG0009222
OG0009223	sp|A4Z944|ZBED5_CANLF Zinc finger BED domain-containing protein 5 OS=Canis lupus familiaris OX=9615 GN=ZBED5 PE=4 SV=1
OG0009224	sp|Q9CQZ1|HSBP1_MOUSE Heat shock factor-binding protein 1 OS=Mus musculus OX=10090 GN=Hsbp1 PE=1 SV=1
OG0009227	sp|F1MJR8|TEX14_BOVIN Inactive serine/threonine-protein kinase TEX14 OS=Bos taurus OX=9913 GN=TEX14 PE=3 SV=2
OG0009228	sp|Q6CQE5|TAR1_KLULA Protein TAR1 OS=Kluyveromyces lactis (strain ATCC 8585 / CBS 2359 / DSM 70799 / NBRC 1267 / NRRL Y-1140 / WM37) OX=284590 GN=TAR1-A PE=4 SV=2
OG0009232	sp|Q9HCI6|K1586_HUMAN E3 SUMO-protein ligase KIAA1586 OS=Homo sapiens OX=9606 GN=KIAA1586 PE=1 SV=2
OG0009237	sp|P22897|MRC1_HUMAN Macrophage mannose receptor 1 OS=Homo sapiens OX=9606 GN=MRC1 PE=1 SV=1
OG0009241
OG0009252	sp|Q9P215|POGK_HUMAN Pogo transposable element with KRAB domain OS=Homo sapiens OX=9606 GN=POGK PE=1 SV=2
OG0009254	sp|Q9NBX4|RTXE_DROME Probable RNA-directed DNA polymerase from transposon X-element OS=Drosophila melanogaster OX=7227 GN=X-element\ORF2 PE=3 SV=1
OG0009262	sp|P15989|CO6A3_CHICK Collagen alpha-3(VI) chain OS=Gallus gallus OX=9031 GN=COL6A3 PE=2 SV=2
OG0009306	sp|Q3ZBR6|SEM1_BOVIN 26S proteasome complex subunit SEM1 OS=Bos taurus OX=9913 GN=SEM1 PE=3 SV=1
OG0009321	sp|Q95SX7|RTBS_DROME Probable RNA-directed DNA polymerase from transposon BS OS=Drosophila melanogaster OX=7227 GN=RTase PE=2 SV=1
OG0009327	sp|Q9UBS5|GABR1_HUMAN Gamma-aminobutyric acid type B receptor subunit 1 OS=Homo sapiens OX=9606 GN=GABBR1 PE=1 SV=1
OG0009328	sp|Q6DHJ6|COXM2_DANRE COX assembly mitochondrial protein 2 homolog OS=Danio rerio OX=7955 GN=cmc2 PE=3 SV=1
OG0009347	sp|Q6PBK3|RS28_DANRE 40S ribosomal protein S28 OS=Danio rerio OX=7955 GN=rps28 PE=3 SV=1
OG0009355	sp|Q5U220|TM254_RAT Transmembrane protein 254 OS=Rattus norvegicus OX=10116 GN=Tmem254 PE=2 SV=1
OG0009356	sp|Q99LJ7|RCBT2_MOUSE RCC1 and BTB domain-containing protein 2 OS=Mus musculus OX=10090 GN=Rcbtb2 PE=1 SV=1
OG0009366	sp|Q5ZKH0|TF2H5_CHICK General transcription factor IIH subunit 5 OS=Gallus gallus OX=9031 GN=GTF2H5 PE=3 SV=1
OG0009370	sp|Q8BLN5|LSS_MOUSE Lanosterol synthase OS=Mus musculus OX=10090 GN=Lss PE=1 SV=2
OG0009375	sp|Q5EBM0|CMPK2_HUMAN UMP-CMP kinase 2, mitochondrial OS=Homo sapiens OX=9606 GN=CMPK2 PE=1 SV=3
OG0009390	sp|O95872|GPAN1_HUMAN G patch domain and ankyrin repeat-containing protein 1 OS=Homo sapiens OX=9606 GN=GPANK1 PE=1 SV=1
OG0009395	sp|Q86X83|COMD2_HUMAN COMM domain-containing protein 2 OS=Homo sapiens OX=9606 GN=COMMD2 PE=1 SV=2
OG0009402	sp|Q9CR13|FMC1_MOUSE Protein FMC1 homolog OS=Mus musculus OX=10090 GN=Fmc1 PE=1 SV=1
OG0009409	sp|Q9BU79|TM243_HUMAN Transmembrane protein 243 OS=Homo sapiens OX=9606 GN=TMEM243 PE=1 SV=1
OG0009417	sp|P85007|IR3IP_RAT Immediate early response 3-interacting protein 1 OS=Rattus norvegicus OX=10116 GN=Ier3ip1 PE=3 SV=1
OG0009418	sp|Q9ERU9|RBP2_MOUSE E3 SUMO-protein ligase RanBP2 OS=Mus musculus OX=10090 GN=Ranbp2 PE=1 SV=2
OG0009420	sp|Q5ZMM5|ZN706_CHICK Zinc finger protein 706 OS=Gallus gallus OX=9031 GN=ZNF706 PE=3 SV=1
OG0009422	sp|Q3USL1|KLDC9_MOUSE Kelch domain-containing protein 9 OS=Mus musculus OX=10090 GN=Klhdc9 PE=1 SV=1
OG0009429	sp|Q9NRX6|KISHB_HUMAN Protein kish-B OS=Homo sapiens OX=9606 GN=TMEM167B PE=1 SV=1
OG0009430	sp|Q8IY92|SLX4_HUMAN Structure-specific endonuclease subunit SLX4 OS=Homo sapiens OX=9606 GN=SLX4 PE=1 SV=3
OG0009434	sp|P82920|RT21_BOVIN 28S ribosomal protein S21, mitochondrial OS=Bos taurus OX=9913 GN=MRPS21 PE=1 SV=3
OG0009435	sp|Q8IVL1|NAV2_HUMAN Neuron navigator 2 OS=Homo sapiens OX=9606 GN=NAV2 PE=1 SV=3
OG0009456	sp|Q9UL62|TRPC5_HUMAN Short transient receptor potential channel 5 OS=Homo sapiens OX=9606 GN=TRPC5 PE=1 SV=1
OG0009465	sp|Q9BRQ0|PYGO2_HUMAN Pygopus homolog 2 OS=Homo sapiens OX=9606 GN=PYGO2 PE=1 SV=2
OG0009483	sp|P34661|UFM1_CAEEL Ubiquitin-fold modifier 1 OS=Caenorhabditis elegans OX=6239 GN=ufm-1 PE=1 SV=1
OG0009485	sp|Q9D0P0|EBPL_MOUSE Emopamil-binding protein-like OS=Mus musculus OX=10090 GN=Ebpl PE=2 SV=1
OG0009486	sp|C3XVM1|GATC_BRAFL Glutamyl-tRNA(Gln) amidotransferase subunit C, mitochondrial OS=Branchiostoma floridae OX=7739 GN=BRAFLDRAFT_270748 PE=3 SV=1
OG0009488	sp|Q0P5N6|ARL16_HUMAN ADP-ribosylation factor-like protein 16 OS=Homo sapiens OX=9606 GN=ARL16 PE=1 SV=1
OG0009494	sp|O09101|PIGF_MOUSE Phosphatidylinositol-glycan biosynthesis class F protein OS=Mus musculus OX=10090 GN=Pigf PE=1 SV=1
OG0009507	sp|P49119|CDKA1_MESAU Cyclin-dependent kinase 2-associated protein 1 OS=Mesocricetus auratus OX=10036 GN=CDK2AP1 PE=2 SV=1
OG0009514	sp|Q5R5D2|SOSD1_PONAB Sclerostin domain-containing protein 1 OS=Pongo abelii OX=9601 GN=SOSTDC1 PE=2 SV=1
OG0009521	sp|Q7ZZ03|FUCM_DANRE Fucose mutarotase OS=Danio rerio OX=7955 GN=fuom PE=2 SV=1
OG0009524	sp|Q5ZKT6|EFMT1_CHICK EEF1A lysine methyltransferase 1 OS=Gallus gallus OX=9031 GN=EEF1AKMT1 PE=2 SV=1
OG0009529	sp|Q5T4D3|TMTC4_HUMAN Protein O-mannosyl-transferase TMTC4 OS=Homo sapiens OX=9606 GN=TMTC4 PE=1 SV=2
OG0009530	sp|A0A0R4IBK5|R213A_DANRE E3 ubiquitin-protein ligase rnf213-alpha OS=Danio rerio OX=7955 GN=rnf213a PE=3 SV=1
OG0009532
OG0009535	sp|P59669|UBIQP_GEOCY Polyubiquitin OS=Geodia cydonium OX=6047 PE=2 SV=2
OG0009537
OG0009538	sp|Q91VN0|LRP5_MOUSE Low-density lipoprotein receptor-related protein 5 OS=Mus musculus OX=10090 GN=Lrp5 PE=1 SV=3
OG0009558	sp|Q94981|ARI1_DROME E3 ubiquitin-protein ligase ariadne-1 OS=Drosophila melanogaster OX=7227 GN=ari-1 PE=1 SV=2
OG0009564	sp|O88513|GEMI_MOUSE Geminin OS=Mus musculus OX=10090 GN=Gmnn PE=1 SV=1
OG0009565
OG0009569
OG0009571	sp|P22781|DDC_CAVPO Aromatic-L-amino-acid decarboxylase OS=Cavia porcellus OX=10141 GN=DDC PE=2 SV=1
OG0009572	sp|B3TP03|CTR2_CHICK Cationic amino acid transporter 2 OS=Gallus gallus OX=9031 GN=SLC7A2 PE=2 SV=1
OG0009573
OG0009574	sp|Q8C4U2|TM145_MOUSE Transmembrane protein 145 OS=Mus musculus OX=10090 GN=Tmem145 PE=1 SV=1
OG0009575
OG0009576
OG0009578	sp|A0JN80|DI3L1_BOVIN DIS3-like exonuclease 1 OS=Bos taurus OX=9913 GN=DIS3L PE=2 SV=2
OG0009581
OG0009586	sp|Q91VR8|BRK1_MOUSE Protein BRICK1 OS=Mus musculus OX=10090 GN=Brk1 PE=1 SV=1
OG0009591	sp|Q9SFB6|M3KE2_ARATH MAP3K epsilon protein kinase 2 OS=Arabidopsis thaliana OX=3702 GN=MAP3KE2 PE=2 SV=1
OG0009593	sp|Q9BEG5|EDA_BOVIN Ectodysplasin-A OS=Bos taurus OX=9913 GN=EDA PE=3 SV=2
OG0009597	sp|Q66GV0|MPV17_XENLA Protein Mpv17 OS=Xenopus laevis OX=8355 GN=mpv17 PE=2 SV=2
OG0009598
OG0009655	sp|Q1L987|ATPF1_DANRE ATP synthase mitochondrial F1 complex assembly factor 1 OS=Danio rerio OX=7955 GN=atpaf1 PE=2 SV=2
OG0009658	sp|Q8NDZ4|DIK2A_HUMAN Divergent protein kinase domain 2A OS=Homo sapiens OX=9606 GN=DIPK2A PE=1 SV=1
OG0009660	sp|A6H7H7|FBX3_BOVIN F-box only protein 3 OS=Bos taurus OX=9913 GN=FBXO3 PE=2 SV=1
OG0009661	sp|Q8IS44|DRD2L_DROME Dopamine D2-like receptor OS=Drosophila melanogaster OX=7227 GN=Dop2R PE=2 SV=2
OG0009672	sp|Q63647|PNRC1_RAT Proline-rich nuclear receptor coactivator 1 OS=Rattus norvegicus OX=10116 GN=Pnrc1 PE=2 SV=2
OG0009673	sp|Q32L09|SHFL_BOVIN Shiftless antiviral inhibitor of ribosomal frameshifting protein homolog OS=Bos taurus OX=9913 GN=SHFL PE=2 SV=1
OG0009674	sp|Q8TCA0|LRC20_HUMAN Leucine-rich repeat-containing protein 20 OS=Homo sapiens OX=9606 GN=LRRC20 PE=1 SV=1
OG0009675	sp|Q6DGV1|CELF4_DANRE CUGBP Elav-like family member 4 OS=Danio rerio OX=7955 GN=celf4 PE=2 SV=1
OG0009681	sp|Q9H0Y0|ATG10_HUMAN Ubiquitin-like-conjugating enzyme ATG10 OS=Homo sapiens OX=9606 GN=ATG10 PE=1 SV=1
OG0009682	sp|Q3ZBK6|LSM4_BOVIN U6 snRNA-associated Sm-like protein LSm4 OS=Bos taurus OX=9913 GN=LSM4 PE=2 SV=1
OG0009686	sp|Q8WY91|THAP4_HUMAN Peroxynitrite isomerase THAP4 OS=Homo sapiens OX=9606 GN=THAP4 PE=1 SV=2
OG0009687	sp|Q4G112|HSF5_HUMAN Heat shock factor protein 5 OS=Homo sapiens OX=9606 GN=HSF5 PE=2 SV=2
OG0009689	sp|Q9HCI7|MSL2_HUMAN E3 ubiquitin-protein ligase MSL2 OS=Homo sapiens OX=9606 GN=MSL2 PE=1 SV=2
OG0009690	sp|Q9UKN7|MYO15_HUMAN Unconventional myosin-XV OS=Homo sapiens OX=9606 GN=MYO15A PE=1 SV=2
OG0009693	sp|P21328|RTJK_DROME RNA-directed DNA polymerase from mobile element jockey OS=Drosophila melanogaster OX=7227 GN=pol PE=1 SV=1
OG0009694	sp|Q8IYA7|MKX_HUMAN Homeobox protein Mohawk OS=Homo sapiens OX=9606 GN=MKX PE=2 SV=2
OG0009695	sp|Q12766|HMGX3_HUMAN HMG domain-containing protein 3 OS=Homo sapiens OX=9606 GN=HMGXB3 PE=2 SV=2
OG0009696	sp|Q9NRH1|YAE1_HUMAN Protein YAE1 homolog OS=Homo sapiens OX=9606 GN=YAE1 PE=1 SV=1
OG0009699	sp|P83516|IXCI_RHIMP Chymotrypsin-elastase inhibitor ixodidin OS=Rhipicephalus microplus OX=6941 PE=1 SV=2
OG0009700	sp|Q9CQ44|TM218_MOUSE Transmembrane protein 218 OS=Mus musculus OX=10090 GN=Tmem218 PE=3 SV=1
OG0009706	sp|Q9H840|GEMI7_HUMAN Gem-associated protein 7 OS=Homo sapiens OX=9606 GN=GEMIN7 PE=1 SV=1
OG0009712	sp|Q9WTK0|NUPR1_MOUSE Nuclear protein 1 OS=Mus musculus OX=10090 GN=Nupr1 PE=1 SV=1
OG0009717
OG0009736	sp|Q566X8|DMX1B_DANRE Diencephalon/mesencephalon homeobox protein 1-B OS=Danio rerio OX=7955 GN=dmbx1b PE=2 SV=1
OG0009740	sp|Q9D1Q4|DPM3_MOUSE Dolichol-phosphate mannosyltransferase subunit 3 OS=Mus musculus OX=10090 GN=Dpm3 PE=1 SV=1
OG0009748	sp|Q9NZE8|RM35_HUMAN 39S ribosomal protein L35, mitochondrial OS=Homo sapiens OX=9606 GN=MRPL35 PE=1 SV=3
OG0009752	sp|Q14534|ERG1_HUMAN Squalene monooxygenase OS=Homo sapiens OX=9606 GN=SQLE PE=1 SV=3
OG0009754	sp|A7RT29|LTOR5_NEMVE Ragulator complex protein LAMTOR5 homolog OS=Nematostella vectensis OX=45351 GN=v1g226489 PE=3 SV=1
OG0009755	sp|P11031|TCP4_MOUSE Activated RNA polymerase II transcriptional coactivator p15 OS=Mus musculus OX=10090 GN=Sub1 PE=1 SV=3
OG0009756	sp|A0JPE1|DIK1B_XENTR Divergent protein kinase domain 1B OS=Xenopus tropicalis OX=8364 GN=dipk1b PE=2 SV=1
OG0009763	sp|Q58CS8|GNPTG_BOVIN N-acetylglucosamine-1-phosphotransferase subunit gamma OS=Bos taurus OX=9913 GN=GNPTG PE=1 SV=4
OG0009766	sp|Q8TDI7|TMC2_HUMAN Transmembrane channel-like protein 2 OS=Homo sapiens OX=9606 GN=TMC2 PE=2 SV=3
OG0009769	sp|Q8N5I9|CL045_HUMAN Uncharacterized protein C12orf45 OS=Homo sapiens OX=9606 GN=C12orf45 PE=1 SV=2
OG0009792	sp|Q96VG1|YBAI_SCHPO Uncharacterized protein C119.18 OS=Schizosaccharomyces pombe (strain 972 / ATCC 24843) OX=284812 GN=SPBC119.18 PE=3 SV=1
OG0009794
OG0009812	sp|P29419|ATP5I_RAT ATP synthase subunit e, mitochondrial OS=Rattus norvegicus OX=10116 GN=Atp5me PE=1 SV=3
OG0009816	sp|Q80Z19|MUC2_MOUSE Mucin-2 (Fragments) OS=Mus musculus OX=10090 GN=Muc2 PE=1 SV=2
OG0009817	sp|Q9W0Y8|SCN60_DROME Sodium channel protein 60E OS=Drosophila melanogaster OX=7227 GN=NaCP60E PE=2 SV=6
OG0009839	sp|Q40302|CALM_MACPY Calmodulin OS=Macrocystis pyrifera OX=35122 PE=2 SV=3
OG0009840	sp|Q6NVF4|HELB_MOUSE DNA helicase B OS=Mus musculus OX=10090 GN=Helb PE=1 SV=2
OG0009851	sp|Q23551|UNC22_CAEEL Twitchin OS=Caenorhabditis elegans OX=6239 GN=unc-22 PE=1 SV=3
OG0009856	sp|Q9NYJ1|COA4_HUMAN Cytochrome c oxidase assembly factor 4 homolog, mitochondrial OS=Homo sapiens OX=9606 GN=COA4 PE=1 SV=2
OG0009860	sp|A2A9C3|SZT2_MOUSE KICSTOR complex protein SZT2 OS=Mus musculus OX=10090 GN=Szt2 PE=1 SV=1
OG0009864
OG0009868	sp|Q3U3C9|GSE1_MOUSE Genetic suppressor element 1 OS=Mus musculus OX=10090 GN=Gse1 PE=1 SV=2
OG0009874	sp|O95243|MBD4_HUMAN Methyl-CpG-binding domain protein 4 OS=Homo sapiens OX=9606 GN=MBD4 PE=1 SV=1
OG0009881
OG0009892	sp|Q40302|CALM_MACPY Calmodulin OS=Macrocystis pyrifera OX=35122 PE=2 SV=3
OG0009895
OG0009896	sp|Q9UUA2|PIF1_SCHPO ATP-dependent DNA helicase pfh1 OS=Schizosaccharomyces pombe (strain 972 / ATCC 24843) OX=284812 GN=pfh1 PE=1 SV=1
OG0009902	sp|P04283|ENV17_DROME Retrovirus-related Env polyprotein from copia-like transposable element 17.6 OS=Drosophila melanogaster OX=7227 GN=env PE=4 SV=1
OG0009903	sp|Q86YA3|ZGRF1_HUMAN Protein ZGRF1 OS=Homo sapiens OX=9606 GN=ZGRF1 PE=1 SV=3
OG0009910	sp|A1L3N6|COA5_XENLA Cytochrome c oxidase assembly factor 5 OS=Xenopus laevis OX=8355 GN=coa5 PE=3 SV=1
OG0009911	sp|A0A060A682|HAP2_TETTH Hapless 2 OS=Tetrahymena thermophila OX=5911 GN=HAP2 PE=1 SV=1
OG0009913	sp|Q3MHR3|DYL2_BOVIN Dynein light chain 2, cytoplasmic OS=Bos taurus OX=9913 GN=DYNLL2 PE=3 SV=1
OG0009915	sp|Q6TDP3|KLH17_MOUSE Kelch-like protein 17 OS=Mus musculus OX=10090 GN=Klhl17 PE=1 SV=1
OG0009918
OG0009928
OG0009937
OG0009939	sp|Q19038|DEL1_CAEEL Degenerin del-1 OS=Caenorhabditis elegans OX=6239 GN=del-1 PE=2 SV=1
OG0009940	sp|Q9JIT1|RNF32_MOUSE RING finger protein 32 OS=Mus musculus OX=10090 GN=Rnf32 PE=1 SV=1
OG0009946	sp|Q95SX7|RTBS_DROME Probable RNA-directed DNA polymerase from transposon BS OS=Drosophila melanogaster OX=7227 GN=RTase PE=2 SV=1
OG0009953	sp|P10394|POL4_DROME Retrovirus-related Pol polyprotein from transposon 412 OS=Drosophila melanogaster OX=7227 GN=POL PE=4 SV=1
OG0010006	sp|Q7T3B2|HRG1A_DANRE Heme transporter hrg1-A OS=Danio rerio OX=7955 GN=slc48a1b PE=2 SV=1
OG0010019	sp|Q9CPQ1|COX6C_MOUSE Cytochrome c oxidase subunit 6C OS=Mus musculus OX=10090 GN=Cox6c PE=1 SV=3
OG0010023	sp|P35992|PTP10_DROME Tyrosine-protein phosphatase 10D OS=Drosophila melanogaster OX=7227 GN=Ptp10D PE=1 SV=4
OG0010028	sp|Q6SXP0|CI016_CTEID UPF0184 protein C9orf16 homolog OS=Ctenopharyngodon idella OX=7959 PE=3 SV=1
OG0010030
OG0010042	sp|Q9C0G6|DYH6_HUMAN Dynein heavy chain 6, axonemal OS=Homo sapiens OX=9606 GN=DNAH6 PE=2 SV=3
OG0010043	sp|Q1LUK1|MIC13_DANRE MICOS complex subunit MIC13 OS=Danio rerio OX=7955 GN=micos13 PE=3 SV=1
OG0010044	sp|Q4KLQ5|WDR76_XENLA WD repeat-containing protein 76 OS=Xenopus laevis OX=8355 GN=wdr76 PE=2 SV=1
OG0010048
OG0010055	sp|Q8WP33|CCD30_MACFA Coiled-coil domain-containing protein 30 OS=Macaca fascicularis OX=9541 GN=CCDC30 PE=2 SV=1
OG0010061	sp|Q9H4I8|SEHL2_HUMAN Serine hydrolase-like protein 2 OS=Homo sapiens OX=9606 GN=SERHL2 PE=2 SV=1
OG0010073	sp|E1BGN7|CGAS_BOVIN Cyclic GMP-AMP synthase OS=Bos taurus OX=9913 GN=CGAS PE=3 SV=1
OG0010081	sp|E1BZR9|TCPR1_CHICK Tectonin beta-propeller repeat-containing protein 1 OS=Gallus gallus OX=9031 GN=TECPR1 PE=3 SV=1
OG0010084	sp|Q7TQ07|DPOLN_MOUSE DNA polymerase nu OS=Mus musculus OX=10090 GN=Poln PE=2 SV=2
OG0010085	sp|Q06248|HSP74_PARLI Heat shock 70 kDa protein IV OS=Paracentrotus lividus OX=7656 GN=HSP70IV PE=3 SV=1
OG0010093	sp|Q94BT9|ATOX1_ARATH Copper transport protein ATX1 OS=Arabidopsis thaliana OX=3702 GN=ATX1 PE=1 SV=2
OG0010095	sp|P0CF65|CRBN_CHICK Protein cereblon OS=Gallus gallus OX=9031 GN=CRBN PE=1 SV=1
OG0010097	sp|Q1L8Y6|BBIP1_DANRE BBSome-interacting protein 1 OS=Danio rerio OX=7955 GN=bbip1 PE=3 SV=1
OG0010099	sp|Q8N2R8|FA43A_HUMAN Protein FAM43A OS=Homo sapiens OX=9606 GN=FAM43A PE=1 SV=2
OG0010101
OG0010102
OG0010105	sp|E6ZHJ8|FXL15_DICLA F-box/LRR-repeat protein 15 OS=Dicentrarchus labrax OX=13489 GN=fbxl15 PE=3 SV=1
OG0010110	sp|B5XFA7|LYRM2_SALSA LYR motif-containing protein 2 OS=Salmo salar OX=8030 GN=lyrm2 PE=3 SV=1
OG0010116	sp|Q9QZL6|UBP21_MOUSE Ubiquitin carboxyl-terminal hydrolase 21 OS=Mus musculus OX=10090 GN=Usp21 PE=1 SV=1
OG0010117	sp|Q9BSW7|SYT17_HUMAN Synaptotagmin-17 OS=Homo sapiens OX=9606 GN=SYT17 PE=1 SV=1
OG0010121	sp|P0DMV4|ITLN_ONCMY Intelectin OS=Oncorhynchus mykiss OX=8022 GN=itln PE=1 SV=1
OG0010122	sp|Q9BUK0|CHCH7_HUMAN Coiled-coil-helix-coiled-coil-helix domain-containing protein 7 OS=Homo sapiens OX=9606 GN=CHCHD7 PE=1 SV=1
OG0010129	sp|P42575|CASP2_HUMAN Caspase-2 OS=Homo sapiens OX=9606 GN=CASP2 PE=1 SV=2
OG0010130	sp|Q28HC7|COMD6_XENTR COMM domain-containing protein 6 OS=Xenopus tropicalis OX=8364 GN=commd6 PE=2 SV=1
OG0010139	sp|Q6PBT6|GFRP_DANRE GTP cyclohydrolase 1 feedback regulatory protein OS=Danio rerio OX=7955 GN=gchfr PE=3 SV=1
OG0010143
OG0010145	sp|Q02032|HUNB_PSYCI Protein hunchback (Fragment) OS=Psychoda cinerea OX=7202 GN=hb PE=3 SV=1
OG0010148	sp|Q5ZKB8|CDPF1_CHICK Cysteine-rich DPF motif domain-containing protein 1 OS=Gallus gallus OX=9031 GN=CDPF1 PE=2 SV=1
OG0010154	sp|Q14146|URB2_HUMAN Unhealthy ribosome biogenesis protein 2 homolog OS=Homo sapiens OX=9606 GN=URB2 PE=1 SV=2
OG0010158
OG0010162	sp|Q7TQ62|PODN_MOUSE Podocan OS=Mus musculus OX=10090 GN=Podn PE=2 SV=1
OG0010165	sp|Q86YT5|S13A5_HUMAN Solute carrier family 13 member 5 OS=Homo sapiens OX=9606 GN=SLC13A5 PE=1 SV=1
OG0010179	sp|Q8TBH0|ARRD2_HUMAN Arrestin domain-containing protein 2 OS=Homo sapiens OX=9606 GN=ARRDC2 PE=1 SV=2
OG0010181	sp|Q6GLA1|MSD4_XENTR Myb/SANT-like DNA-binding domain-containing protein 4 OS=Xenopus tropicalis OX=8364 GN=msantd4 PE=2 SV=1
OG0010182	sp|Q3SZR9|TSN3_BOVIN Tetraspanin-3 OS=Bos taurus OX=9913 GN=TSPAN3 PE=2 SV=1
OG0010183	sp|Q6JAN1|INVS_CANLF Inversin OS=Canis lupus familiaris OX=9615 GN=INVS PE=1 SV=1
OG0010184	sp|Q9NZM1|MYOF_HUMAN Myoferlin OS=Homo sapiens OX=9606 GN=MYOF PE=1 SV=1
OG0010185	sp|O75564|JERKY_HUMAN Jerky protein homolog OS=Homo sapiens OX=9606 GN=JRK PE=1 SV=3
OG0010190	sp|Q1L8X9|VGLU3_DANRE Vesicular glutamate transporter 3 OS=Danio rerio OX=7955 GN=slc17a8 PE=3 SV=2
OG0010192	sp|Q09884|DCR1_SCHPO Protein Dicer OS=Schizosaccharomyces pombe (strain 972 / ATCC 24843) OX=284812 GN=dcr1 PE=1 SV=1
OG0010197	sp|Q9JIP0|TRPV5_RAT Transient receptor potential cation channel subfamily V member 5 OS=Rattus norvegicus OX=10116 GN=Trpv5 PE=1 SV=1
OG0010203	sp|Q91ZI0|CELR3_MOUSE Cadherin EGF LAG seven-pass G-type receptor 3 OS=Mus musculus OX=10090 GN=Celsr3 PE=2 SV=2
OG0010204	sp|Q8R207|SPTSA_MOUSE Serine palmitoyltransferase small subunit A OS=Mus musculus OX=10090 GN=Sptssa PE=3 SV=2
OG0010207	sp|B8VIU6|USOM5_ACRMI Uncharacterized skeletal organic matrix protein 5 OS=Acropora millepora OX=45264 PE=1 SV=1
OG0010213
OG0010215
OG0010220	sp|Q9P2R3|ANFY1_HUMAN Rabankyrin-5 OS=Homo sapiens OX=9606 GN=ANKFY1 PE=1 SV=2
OG0010229	sp|Q2M2S5|COA6_BOVIN Cytochrome c oxidase assembly factor 6 homolog OS=Bos taurus OX=9913 GN=COA6 PE=3 SV=1
OG0010231	sp|Q94B65|UTR7_ARATH UDP-galactose/UDP-glucose transporter 7 OS=Arabidopsis thaliana OX=3702 GN=UTR7 PE=1 SV=1
OG0010233	sp|Q9UHC6|CNTP2_HUMAN Contactin-associated protein-like 2 OS=Homo sapiens OX=9606 GN=CNTNAP2 PE=1 SV=1
OG0010234	sp|Q9BQ49|SMIM7_HUMAN Small integral membrane protein 7 OS=Homo sapiens OX=9606 GN=SMIM7 PE=1 SV=2
OG0010235	sp|Q3ZBC0|RPAB4_BOVIN DNA-directed RNA polymerases I, II, and III subunit RPABC4 OS=Bos taurus OX=9913 GN=POLR2K PE=1 SV=1
OG0010236	sp|Q3T0Z3|UBL5_BOVIN Ubiquitin-like protein 5 OS=Bos taurus OX=9913 GN=UBL5 PE=3 SV=1
OG0010242	sp|Q8VCZ3|THAP7_MOUSE THAP domain-containing protein 7 OS=Mus musculus OX=10090 GN=Thap7 PE=2 SV=1
OG0010245	sp|Q96EY4|TMA16_HUMAN Translation machinery-associated protein 16 OS=Homo sapiens OX=9606 GN=TMA16 PE=1 SV=2
OG0010251	sp|P22897|MRC1_HUMAN Macrophage mannose receptor 1 OS=Homo sapiens OX=9606 GN=MRC1 PE=1 SV=1
OG0010253	sp|Q6W3F4|AA2BR_CANLF Adenosine receptor A2b OS=Canis lupus familiaris OX=9615 GN=ADORA2B PE=2 SV=1
OG0010254	sp|Q9C010|IPKB_HUMAN cAMP-dependent protein kinase inhibitor beta OS=Homo sapiens OX=9606 GN=PKIB PE=1 SV=1
OG0010255	sp|Q40302|CALM_MACPY Calmodulin OS=Macrocystis pyrifera OX=35122 PE=2 SV=3
OG0010256	sp|Q99M80|PTPRT_MOUSE Receptor-type tyrosine-protein phosphatase T OS=Mus musculus OX=10090 GN=Ptprt PE=1 SV=2
OG0010260	sp|P57054|PIGP_HUMAN Phosphatidylinositol N-acetylglucosaminyltransferase subunit P OS=Homo sapiens OX=9606 GN=PIGP PE=1 SV=4
OG0010261	sp|Q2NL30|SUV91_BOVIN Histone-lysine N-methyltransferase SUV39H1 OS=Bos taurus OX=9913 GN=SUV39H1 PE=2 SV=1
OG0010265
OG0010273	sp|Q03278|PO21_NASVI Retrovirus-related Pol polyprotein from type-1 retrotransposable element R2 (Fragment) OS=Nasonia vitripennis OX=7425 PE=4 SV=2
OG0010274
OG0010275	sp|Q9UJ78|ZMYM5_HUMAN Zinc finger MYM-type protein 5 OS=Homo sapiens OX=9606 GN=ZMYM5 PE=1 SV=4
OG0010292	sp|Q9Y6R7|FCGBP_HUMAN IgGFc-binding protein OS=Homo sapiens OX=9606 GN=FCGBP PE=1 SV=3
OG0010299
OG0010352	sp|Q8BGX0|TRI23_MOUSE E3 ubiquitin-protein ligase TRIM23 OS=Mus musculus OX=10090 GN=Trim23 PE=2 SV=1
OG0010359	sp|Q10126|YSM6_CAEEL Putative uncharacterized transposon-derived protein F52C9.6 OS=Caenorhabditis elegans OX=6239 GN=F52C9.6 PE=5 SV=1
OG0010378	sp|P0C0A9|SVIP_RAT Small VCP/p97-interacting protein OS=Rattus norvegicus OX=10116 GN=Svip PE=1 SV=1
OG0010390	sp|P0DPD7|EFMT4_HUMAN EEF1A lysine methyltransferase 4 OS=Homo sapiens OX=9606 GN=EEF1AKMT4 PE=1 SV=1
OG0010400	sp|Q9VQ30|CHNMO_DROME Zinc finger protein chinmo OS=Drosophila melanogaster OX=7227 GN=chinmo PE=1 SV=3
OG0010405	sp|Q86VH4|LRRT4_HUMAN Leucine-rich repeat transmembrane neuronal protein 4 OS=Homo sapiens OX=9606 GN=LRRTM4 PE=2 SV=2
OG0010406	sp|P53708|ITA8_HUMAN Integrin alpha-8 OS=Homo sapiens OX=9606 GN=ITGA8 PE=1 SV=3
OG0010407	sp|Q03277|PO11_BRACO Retrovirus-related Pol polyprotein from type-1 retrotransposable element R1 (Fragment) OS=Bradysia coprophila OX=38358 PE=4 SV=1
OG0010422	sp|Q9JIS1|RIMS2_RAT Regulating synaptic membrane exocytosis protein 2 OS=Rattus norvegicus OX=10116 GN=Rims2 PE=1 SV=1
OG0010430	sp|Q9QYS2|GRM3_MOUSE Metabotropic glutamate receptor 3 OS=Mus musculus OX=10090 GN=Grm3 PE=1 SV=1
OG0010433
OG0010437	sp|Q94BZ1|ZIFL1_ARATH Protein ZINC INDUCED FACILITATOR-LIKE 1 OS=Arabidopsis thaliana OX=3702 GN=ZIFL1 PE=2 SV=1
OG0010438	sp|Q7TN88|PK1L2_MOUSE Polycystic kidney disease protein 1-like 2 OS=Mus musculus OX=10090 GN=Pkd1l2 PE=2 SV=1
OG0010446	sp|Q9NYL5|CP39A_HUMAN 24-hydroxycholesterol 7-alpha-hydroxylase OS=Homo sapiens OX=9606 GN=CYP39A1 PE=1 SV=2
OG0010450	sp|Q9TSZ3|KCNH2_CANLF Potassium voltage-gated channel subfamily H member 2 OS=Canis lupus familiaris OX=9615 GN=KCNH2 PE=2 SV=1
OG0010465
OG0010474	sp|Q5RHB5|IRAG2_DANRE Inositol 1,4,5-triphosphate receptor associated 2 OS=Danio rerio OX=7955 GN=irag2 PE=1 SV=2
OG0010482	sp|Q9CR16|PPID_MOUSE Peptidyl-prolyl cis-trans isomerase D OS=Mus musculus OX=10090 GN=Ppid PE=1 SV=3
OG0010487	sp|Q68EV8|SI12B_XENLA Small integral membrane protein 12-B OS=Xenopus laevis OX=8355 GN=smim12-b PE=3 SV=1
OG0010489	sp|Q8QZT2|CCSAP_MOUSE Centriole, cilia and spindle-associated protein OS=Mus musculus OX=10090 GN=Ccsap PE=1 SV=1
OG0010492	sp|Q24JV4|U390_DANRE UPF0390 protein zgc136864 OS=Danio rerio OX=7955 GN=zgc:136864 PE=3 SV=1
OG0010498	sp|Q9BXR5|TLR10_HUMAN Toll-like receptor 10 OS=Homo sapiens OX=9606 GN=TLR10 PE=1 SV=2
OG0010501	sp|Q08B72|MYPOP_XENLA Myb-related transcription factor, partner of profilin OS=Xenopus laevis OX=8355 GN=mypop PE=2 SV=1
OG0010503	sp|Q5UPX0|YR290_MIMIV Putative ATP-dependent RNA helicase R290 OS=Acanthamoeba polyphaga mimivirus OX=212035 GN=MIMI_R290 PE=3 SV=1
OG0010511
OG0010519	sp|O97394|SDK_DROME Protein sidekick OS=Drosophila melanogaster OX=7227 GN=sdk PE=1 SV=2
OG0010520
OG0010531	sp|Q9M363|B561I_ARATH Cytochrome b561 and DOMON domain-containing protein At3g61750 OS=Arabidopsis thaliana OX=3702 GN=At3g61750 PE=3 SV=1
OG0010539	sp|Q7T3T9|ZAR1_TAKRU Zygote arrest protein 1 OS=Takifugu rubripes OX=31033 GN=zar1 PE=2 SV=1
OG0010540	sp|A0A0R4IMY7|TRPM2_DANRE Transient receptor potential cation channel subfamily M member 2 OS=Danio rerio OX=7955 GN=trpm2 PE=1 SV=2
OG0010545	sp|Q6P2H3|CEP85_HUMAN Centrosomal protein of 85 kDa OS=Homo sapiens OX=9606 GN=CEP85 PE=1 SV=1
OG0010559	sp|Q7Z412|PEX26_HUMAN Peroxisome assembly protein 26 OS=Homo sapiens OX=9606 GN=PEX26 PE=1 SV=2
OG0010565	sp|Q9ULT8|HECD1_HUMAN E3 ubiquitin-protein ligase HECTD1 OS=Homo sapiens OX=9606 GN=HECTD1 PE=1 SV=3
OG0010572	sp|Q9JI60|LRAT_MOUSE Lecithin retinol acyltransferase OS=Mus musculus OX=10090 GN=Lrat PE=1 SV=1
OG0010583
OG0010588	sp|P05552|ADF1_DROME Transcription factor Adf-1 OS=Drosophila melanogaster OX=7227 GN=Adf1 PE=2 SV=2
OG0010591	sp|Q05744|CATD_CHICK Cathepsin D OS=Gallus gallus OX=9031 GN=CTSD PE=1 SV=1
OG0010592	sp|Q6T486|RBRA_DICDI Probable E3 ubiquitin-protein ligase rbrA OS=Dictyostelium discoideum OX=44689 GN=rbrA PE=3 SV=1
OG0010596	sp|Q3UHC2|LRRK1_MOUSE Leucine-rich repeat serine/threonine-protein kinase 1 OS=Mus musculus OX=10090 GN=Lrrk1 PE=1 SV=1
OG0010598	sp|O43422|P52K_HUMAN 52 kDa repressor of the inhibitor of the protein kinase OS=Homo sapiens OX=9606 GN=THAP12 PE=1 SV=2
OG0010599	sp|Q5ZII6|KISHA_CHICK Protein kish-A OS=Gallus gallus OX=9031 GN=TMEM167A PE=3 SV=1
OG0010601	sp|P41044|CAB32_DROME Calbindin-32 OS=Drosophila melanogaster OX=7227 GN=Cbp53E PE=2 SV=1
OG0010602	sp|Q9UKJ3|GPTC8_HUMAN G patch domain-containing protein 8 OS=Homo sapiens OX=9606 GN=GPATCH8 PE=1 SV=2
OG0010603	sp|Q640C5|DOPDB_XENLA D-dopachrome decarboxylase-B OS=Xenopus laevis OX=8355 GN=ddt-b PE=3 SV=1
OG0010605
OG0010609
OG0010614
OG0010623	sp|Q96AA8|JKIP2_HUMAN Janus kinase and microtubule-interacting protein 2 OS=Homo sapiens OX=9606 GN=JAKMIP2 PE=1 SV=1
OG0010624	sp|Q8N695|SC5A8_HUMAN Sodium-coupled monocarboxylate transporter 1 OS=Homo sapiens OX=9606 GN=SLC5A8 PE=1 SV=2
OG0010625
OG0010627	sp|Q14061|COX17_HUMAN Cytochrome c oxidase copper chaperone OS=Homo sapiens OX=9606 GN=COX17 PE=1 SV=2
OG0010629	sp|P35072|TCB1_CAEBR Transposable element Tcb1 transposase OS=Caenorhabditis briggsae OX=6238 PE=3 SV=1
OG0010637	sp|P16423|POLR_DROME Retrovirus-related Pol polyprotein from type-2 retrotransposable element R2DM OS=Drosophila melanogaster OX=7227 GN=pol PE=4 SV=1
OG0010638
OG0010641
OG0010646	sp|O15439|MRP4_HUMAN Multidrug resistance-associated protein 4 OS=Homo sapiens OX=9606 GN=ABCC4 PE=1 SV=3
OG0010662
OG0010671
OG0010675
OG0010680	sp|P22770|ACHA7_CHICK Neuronal acetylcholine receptor subunit alpha-7 OS=Gallus gallus OX=9031 GN=CHRNA7 PE=1 SV=1
OG0010741
OG0010744	sp|Q8KHV6|REBD_LENAE Dichlorochromopyrrolate synthase OS=Lentzea aerocolonigenes OX=68170 GN=rebD PE=1 SV=1
OG0010752
OG0010753	sp|Q9H706|GARE1_HUMAN GRB2-associated and regulator of MAPK protein 1 OS=Homo sapiens OX=9606 GN=GAREM1 PE=1 SV=2
OG0010765	sp|Q9H2C0|GAN_HUMAN Gigaxonin OS=Homo sapiens OX=9606 GN=GAN PE=1 SV=1
OG0010766	sp|Q9EQD2|NPFF2_RAT Neuropeptide FF receptor 2 OS=Rattus norvegicus OX=10116 GN=Npffr2 PE=2 SV=1
OG0010768	sp|Q86T96|RN180_HUMAN E3 ubiquitin-protein ligase RNF180 OS=Homo sapiens OX=9606 GN=RNF180 PE=2 SV=2
OG0010771	sp|Q9BY71|LRRC3_HUMAN Leucine-rich repeat-containing protein 3 OS=Homo sapiens OX=9606 GN=LRRC3 PE=1 SV=1
OG0010786	sp|Q8K593|PLPP2_RAT Phospholipid phosphatase 2 OS=Rattus norvegicus OX=10116 GN=Plpp2 PE=2 SV=1
OG0010792	sp|Q6V0K7|OIT3_RAT Oncoprotein-induced transcript 3 protein OS=Rattus norvegicus OX=10116 GN=Oit3 PE=2 SV=1
OG0010796	sp|Q9QZR8|PDZD2_RAT PDZ domain-containing protein 2 OS=Rattus norvegicus OX=10116 GN=Pdzd2 PE=1 SV=1
OG0010799	sp|Q5VU69|CA189_HUMAN Uncharacterized protein C1orf189 OS=Homo sapiens OX=9606 GN=C1orf189 PE=1 SV=1
OG0010803	sp|Q9NR97|TLR8_HUMAN Toll-like receptor 8 OS=Homo sapiens OX=9606 GN=TLR8 PE=1 SV=1
OG0010814	sp|Q2NKU0|CENPX_BOVIN Centromere protein X OS=Bos taurus OX=9913 GN=CENPX PE=3 SV=1
OG0010815	sp|Q802G6|MSB1A_DANRE Methionine-R-sulfoxide reductase B1-A OS=Danio rerio OX=7955 GN=msrb1 PE=2 SV=3
OG0010818	sp|Q9UDT6|CLIP2_HUMAN CAP-Gly domain-containing linker protein 2 OS=Homo sapiens OX=9606 GN=CLIP2 PE=1 SV=1
OG0010819	sp|Q2M2S2|EMRE_BOVIN Essential MCU regulator, mitochondrial OS=Bos taurus OX=9913 GN=SMDT1 PE=3 SV=1
OG0010830	sp|Q3T073|SERP2_BOVIN Stress-associated endoplasmic reticulum protein 2 OS=Bos taurus OX=9913 GN=SERP2 PE=3 SV=1
OG0010842	sp|O14727|APAF_HUMAN Apoptotic protease-activating factor 1 OS=Homo sapiens OX=9606 GN=APAF1 PE=1 SV=2
OG0010845	sp|Q99NF2|NSMF_MOUSE NMDA receptor synaptonuclear signaling and neuronal migration factor OS=Mus musculus OX=10090 GN=Nsmf PE=1 SV=1
OG0010855	sp|Q6P087|RUSD3_HUMAN Mitochondrial mRNA pseudouridine synthase RPUSD3 OS=Homo sapiens OX=9606 GN=RPUSD3 PE=1 SV=3
OG0010860	sp|Q6A078|CE290_MOUSE Centrosomal protein of 290 kDa OS=Mus musculus OX=10090 GN=Cep290 PE=1 SV=2
OG0010862
OG0010868	sp|Q58DW3|RL29_BOVIN 60S ribosomal protein L29 OS=Bos taurus OX=9913 GN=RPL29 PE=2 SV=3
OG0010872	sp|Q68EK9|CDC26_DANRE Anaphase-promoting complex subunit CDC26 OS=Danio rerio OX=7955 GN=cdc26 PE=3 SV=1
OG0010875	sp|Q8ZYR9|RADA_PYRAE DNA repair and recombination protein RadA OS=Pyrobaculum aerophilum (strain ATCC 51768 / IM2 / DSM 7523 / JCM 9630 / NBRC 100827) OX=178306 GN=radA PE=3 SV=1
OG0010882	sp|Q9N1E3|CD22_PONPY B-cell receptor CD22 (Fragment) OS=Pongo pygmaeus OX=9600 GN=CD22 PE=2 SV=1
OG0010883	sp|Q9Y6U7|RN215_HUMAN RING finger protein 215 OS=Homo sapiens OX=9606 GN=RNF215 PE=4 SV=2
OG0010885	sp|P20585|MSH3_HUMAN DNA mismatch repair protein Msh3 OS=Homo sapiens OX=9606 GN=MSH3 PE=1 SV=4
OG0010890	sp|Q9R1J0|NSDHL_MOUSE Sterol-4-alpha-carboxylate 3-dehydrogenase, decarboxylating OS=Mus musculus OX=10090 GN=Nsdhl PE=1 SV=1
OG0010893	sp|Q4PM47|RS29_IXOSC 40S ribosomal protein S29 OS=Ixodes scapularis OX=6945 GN=RpS29 PE=3 SV=1
OG0010896	sp|P14105|MYH9_CHICK Myosin-9 OS=Gallus gallus OX=9031 GN=MYH9 PE=2 SV=1
OG0010897	sp|Q8K3P0|DR9C7_MOUSE Short-chain dehydrogenase/reductase family 9C member 7 OS=Mus musculus OX=10090 GN=Sdr9c7 PE=2 SV=1
OG0010899
OG0010900	sp|Q9LIG0|Y3136_ARATH Clavaminate synthase-like protein At3g21360 OS=Arabidopsis thaliana OX=3702 GN=At3g21360 PE=1 SV=1
OG0010910	sp|Q8K0U4|HS12A_MOUSE Heat shock 70 kDa protein 12A OS=Mus musculus OX=10090 GN=Hspa12a PE=1 SV=1
OG0010918
OG0010924	sp|Q86W34|AMZ2_HUMAN Archaemetzincin-2 OS=Homo sapiens OX=9606 GN=AMZ2 PE=1 SV=2
OG0010929
OG0010930	sp|Q9LZF7|OTU10_ARATH OVARIAN TUMOR DOMAIN-containing deubiquitinating enzyme 10 OS=Arabidopsis thaliana OX=3702 GN=OTU10 PE=1 SV=1
OG0010936	sp|Q32PD7|CSN9_BOVIN COP9 signalosome complex subunit 9 OS=Bos taurus OX=9913 GN=COPS9 PE=3 SV=1
OG0010943	sp|Q9NYT0|PLEK2_HUMAN Pleckstrin-2 OS=Homo sapiens OX=9606 GN=PLEK2 PE=1 SV=1
OG0010947	sp|Q7SYH5|SC5A8_XENLA Sodium-coupled monocarboxylate transporter 1 OS=Xenopus laevis OX=8355 GN=slc5a8 PE=2 SV=1
OG0010948	sp|Q94694|RAP1_PHYPO Ras-related protein Rap-1 OS=Physarum polycephalum OX=5791 GN=RAP1 PE=2 SV=1
OG0010955	sp|Q9HCI6|K1586_HUMAN E3 SUMO-protein ligase KIAA1586 OS=Homo sapiens OX=9606 GN=KIAA1586 PE=1 SV=2
OG0010968	sp|Q13003|GRIK3_HUMAN Glutamate receptor ionotropic, kainate 3 OS=Homo sapiens OX=9606 GN=GRIK3 PE=2 SV=3
OG0010969	sp|D2IYS2|TORSO_BOMMO Tyrosine-protein kinase receptor torso OS=Bombyx mori OX=7091 GN=tor PE=1 SV=1
OG0010981	sp|O43303|CP110_HUMAN Centriolar coiled-coil protein of 110 kDa OS=Homo sapiens OX=9606 GN=CCP110 PE=1 SV=3
OG0010983
OG0010991
OG0010996	sp|Q95SX7|RTBS_DROME Probable RNA-directed DNA polymerase from transposon BS OS=Drosophila melanogaster OX=7227 GN=RTase PE=2 SV=1
OG0010997	sp|Q7F0J0|CML13_ORYSJ Probable calcium-binding protein CML13 OS=Oryza sativa subsp. japonica OX=39947 GN=CML13 PE=2 SV=1
OG0011004
OG0011015	sp|Q6LX41|ALR_METMP Alanine racemase OS=Methanococcus maripaludis (strain S2 / LL) OX=267377 GN=alr PE=3 SV=1
OG0011021	sp|O89110|CASP8_MOUSE Caspase-8 OS=Mus musculus OX=10090 GN=Casp8 PE=1 SV=1
OG0011035	sp|Q9W332|CUBN_DROME Cubilin homolog OS=Drosophila melanogaster OX=7227 GN=Cubn PE=2 SV=3
OG0011036	sp|Q9XT77|SC5A6_RABIT Sodium-dependent multivitamin transporter OS=Oryctolagus cuniculus OX=9986 GN=SLC5A6 PE=2 SV=1
OG0011041	sp|Q8AYA4|SLB1_DEIAC Snaclec agglucetin subunit beta-1 OS=Deinagkistrodon acutus OX=36307 PE=1 SV=1
OG0011045	sp|Q3SZV8|ROMO1_BOVIN Reactive oxygen species modulator 1 OS=Bos taurus OX=9913 GN=ROMO1 PE=3 SV=1
OG0011046	sp|Q96JS3|PGBD1_HUMAN PiggyBac transposable element-derived protein 1 OS=Homo sapiens OX=9606 GN=PGBD1 PE=1 SV=1
OG0011048	sp|Q5RFF0|SO4C1_PONAB Solute carrier organic anion transporter family member 4C1 OS=Pongo abelii OX=9601 GN=SLCO4C1 PE=2 SV=1
OG0011049
OG0011053	sp|P16152|CBR1_HUMAN Carbonyl reductase [NADPH] 1 OS=Homo sapiens OX=9606 GN=CBR1 PE=1 SV=3
OG0011059
OG0011065
OG0011071	sp|Q802F3|SEP15_DANRE Selenoprotein F OS=Danio rerio OX=7955 GN=selenof PE=2 SV=2
OG0011072	sp|P02751|FINC_HUMAN Fibronectin OS=Homo sapiens OX=9606 GN=FN1 PE=1 SV=5
OG0011077	sp|Q978U3|TRF2_THEVO Tricorn protease-interacting factor F2 OS=Thermoplasma volcanium (strain ATCC 51530 / DSM 4299 / JCM 9571 / NBRC 15438 / GSS1) OX=273116 GN=trf2 PE=3 SV=1
OG0011084	sp|Q8I7P9|POL5_DROME Retrovirus-related Pol polyprotein from transposon opus OS=Drosophila melanogaster OX=7227 GN=pol PE=4 SV=1
OG0011101
OG0011119	sp|Q5ZJU0|MOT9_CHICK Monocarboxylate transporter 9 OS=Gallus gallus OX=9031 GN=SLC16A9 PE=2 SV=1
OG0011192	sp|Q9DAM2|EFCB9_MOUSE EF-hand calcium-binding domain-containing protein 9 OS=Mus musculus OX=10090 GN=Efcab9 PE=1 SV=2
OG0011199	sp|Q969S6|TM203_HUMAN Transmembrane protein 203 OS=Homo sapiens OX=9606 GN=TMEM203 PE=1 SV=1
OG0011202	sp|P00430|COX7C_BOVIN Cytochrome c oxidase subunit 7C, mitochondrial OS=Bos taurus OX=9913 GN=COX7C PE=1 SV=3
OG0011204	sp|Q02505|MUC3A_HUMAN Mucin-3A OS=Homo sapiens OX=9606 GN=MUC3A PE=1 SV=3
OG0011216
OG0011217	sp|Q5ZKY0|TM175_CHICK Endosomal/lysosomal potassium channel TMEM175 OS=Gallus gallus OX=9031 GN=TMEM175 PE=2 SV=2
OG0011221	sp|P35445|COMP_BOVIN Cartilage oligomeric matrix protein OS=Bos taurus OX=9913 GN=COMP PE=1 SV=2
OG0011223	sp|Q9L9E8|NOVT_STRNV dTDP-glucose 4,6-dehydratase OS=Streptomyces niveus OX=193462 GN=novT PE=3 SV=1
OG0011227	sp|Q9H2L4|TMM60_HUMAN Transmembrane protein 60 OS=Homo sapiens OX=9606 GN=TMEM60 PE=1 SV=1
OG0011229	sp|Q9MZU4|RSAD2_PIG Radical S-adenosyl methionine domain-containing protein 2 OS=Sus scrofa OX=9823 GN=RSAD2 PE=2 SV=1
OG0011230	sp|P16423|POLR_DROME Retrovirus-related Pol polyprotein from type-2 retrotransposable element R2DM OS=Drosophila melanogaster OX=7227 GN=pol PE=4 SV=1
OG0011237	sp|O15439|MRP4_HUMAN Multidrug resistance-associated protein 4 OS=Homo sapiens OX=9606 GN=ABCC4 PE=1 SV=3
OG0011238	sp|Q0WW17|RWA2_ARATH Protein REDUCED WALL ACETYLATION 2 OS=Arabidopsis thaliana OX=3702 GN=RWA2 PE=1 SV=1
OG0011240
OG0011247	sp|A0A0R4IBK5|R213A_DANRE E3 ubiquitin-protein ligase rnf213-alpha OS=Danio rerio OX=7955 GN=rnf213a PE=3 SV=1
OG0011252	sp|Q8VCG9|RFXAP_MOUSE Regulatory factor X-associated protein OS=Mus musculus OX=10090 GN=Rfxap PE=2 SV=2
OG0011262	sp|Q8CGQ8|NCKX4_MOUSE Sodium/potassium/calcium exchanger 4 OS=Mus musculus OX=10090 GN=Slc24a4 PE=1 SV=2
OG0011264	sp|Q4KLB0|GLOD5_XENLA Glyoxalase domain-containing protein 5 OS=Xenopus laevis OX=8355 GN=glod5 PE=2 SV=2
OG0011268	sp|Q9BZJ8|GPR61_HUMAN G-protein coupled receptor 61 OS=Homo sapiens OX=9606 GN=GPR61 PE=1 SV=2
OG0011270	sp|Q13487|SNPC2_HUMAN snRNA-activating protein complex subunit 2 OS=Homo sapiens OX=9606 GN=SNAPC2 PE=1 SV=1
OG0011273	sp|Q9CXS4|CENPV_MOUSE Centromere protein V OS=Mus musculus OX=10090 GN=Cenpv PE=1 SV=2
OG0011276
OG0011277	sp|Q9NZP6|NPAP1_HUMAN Nuclear pore-associated protein 1 OS=Homo sapiens OX=9606 GN=NPAP1 PE=1 SV=2
OG0011283	sp|A7Z4X0|TDH_BACVZ L-threonine 3-dehydrogenase OS=Bacillus velezensis (strain DSM 23117 / BGSC 10A6 / FZB42) OX=326423 GN=tdh PE=3 SV=1
OG0011286	sp|P0AF49|YJBQ_ECO57 UPF0047 protein YjbQ OS=Escherichia coli O157:H7 OX=83334 GN=yjbQ PE=3 SV=1
OG0011290	sp|Q9H672|ASB7_HUMAN Ankyrin repeat and SOCS box protein 7 OS=Homo sapiens OX=9606 GN=ASB7 PE=1 SV=2
OG0011291	sp|C8BKC7|MYD88_SHEEP Myeloid differentiation primary response protein MyD88 OS=Ovis aries OX=9940 GN=MYD88 PE=2 SV=2
OG0011293
OG0011294	sp|P00130|QCR9_BOVIN Cytochrome b-c1 complex subunit 9 OS=Bos taurus OX=9913 GN=UQCR10 PE=1 SV=3
OG0011298	sp|Q9Z0F5|CH25H_MOUSE Cholesterol 25-hydroxylase OS=Mus musculus OX=10090 GN=Ch25h PE=1 SV=1
OG0011301	sp|P53792|SC5A2_RAT Sodium/glucose cotransporter 2 OS=Rattus norvegicus OX=10116 GN=Slc5a2 PE=2 SV=1
OG0011303	sp|Q4V7L5|MED9_XENLA Mediator of RNA polymerase II transcription subunit 9 OS=Xenopus laevis OX=8355 GN=med9 PE=3 SV=1
OG0011308	sp|A1A600|EFC4A_DANRE EF-hand calcium-binding domain-containing protein 4A OS=Danio rerio OX=7955 GN=cracr2b PE=2 SV=2
OG0011314
OG0011316	sp|P16066|ANPRA_HUMAN Atrial natriuretic peptide receptor 1 OS=Homo sapiens OX=9606 GN=NPR1 PE=1 SV=1
OG0011320	sp|Q8BW00|PTH_MOUSE Probable peptidyl-tRNA hydrolase OS=Mus musculus OX=10090 GN=Ptrh1 PE=2 SV=1
OG0011322	sp|Q9M630|HBL0_PHYPA Non-symbiotic hemoglobin 0 OS=Physcomitrella patens subsp. patens OX=3218 GN=GLB0 PE=2 SV=1
OG0011325
OG0011331	sp|Q98TB4|GDF8_OREMO Growth/differentiation factor 8 OS=Oreochromis mossambicus OX=8127 GN=gdf-8 PE=2 SV=1
OG0011335
OG0011341	sp|Q9NZ56|FMN2_HUMAN Formin-2 OS=Homo sapiens OX=9606 GN=FMN2 PE=1 SV=4
OG0011350
OG0011351	sp|Q9BXL7|CAR11_HUMAN Caspase recruitment domain-containing protein 11 OS=Homo sapiens OX=9606 GN=CARD11 PE=1 SV=3
OG0011357	sp|Q7T6Y2|YR831_MIMIV Putative serine/threonine-protein kinase/receptor R831 OS=Acanthamoeba polyphaga mimivirus OX=212035 GN=MIMI_R831 PE=3 SV=2
OG0011358	sp|Q9VZW5|FMAR_DROME FMRFamide receptor OS=Drosophila melanogaster OX=7227 GN=FMRFaR PE=2 SV=1
OG0011369	sp|Q9H246|CA021_HUMAN Uncharacterized protein C1orf21 OS=Homo sapiens OX=9606 GN=C1orf21 PE=1 SV=1
OG0011377	sp|A3KMX0|ER6L2_BOVIN DNA excision repair protein ERCC-6-like 2 OS=Bos taurus OX=9913 GN=ERCC6L2 PE=2 SV=3
OG0011382	sp|Q9VEN1|FLNA_DROME Filamin-A OS=Drosophila melanogaster OX=7227 GN=cher PE=1 SV=2
OG0011384	sp|Q8CBH5|MFSD6_MOUSE Major facilitator superfamily domain-containing protein 6 OS=Mus musculus OX=10090 GN=Mfsd6 PE=1 SV=1
OG0011385	sp|Q96RL7|VP13A_HUMAN Vacuolar protein sorting-associated protein 13A OS=Homo sapiens OX=9606 GN=VPS13A PE=1 SV=2
OG0011391	sp|Q15652|JHD2C_HUMAN Probable JmjC domain-containing histone demethylation protein 2C OS=Homo sapiens OX=9606 GN=JMJD1C PE=1 SV=2
OG0011392	sp|Q9LPK5|CML44_ARATH Probable calcium-binding protein CML44 OS=Arabidopsis thaliana OX=3702 GN=CML44 PE=2 SV=2
OG0011397	sp|Q8UUG8|5HT2B_TETFL 5-hydroxytryptamine receptor 2B OS=Tetraodon fluviatilis OX=47145 GN=htr2b PE=2 SV=1
OG0011400	sp|Q14527|HLTF_HUMAN Helicase-like transcription factor OS=Homo sapiens OX=9606 GN=HLTF PE=1 SV=2
OG0011403
OG0011406	sp|Q92002|MYO1C_LITCT Unconventional myosin-Ic OS=Lithobates catesbeianus OX=8400 GN=Myo1c PE=2 SV=1
OG0011414	sp|Q16515|ASIC2_HUMAN Acid-sensing ion channel 2 OS=Homo sapiens OX=9606 GN=ASIC2 PE=1 SV=1
OG0011416	sp|Q55E58|PATS1_DICDI Probable serine/threonine-protein kinase pats1 OS=Dictyostelium discoideum OX=44689 GN=pats1 PE=3 SV=1
OG0011420
OG0011423	sp|A8E5V9|STING_XENTR Stimulator of interferon genes protein OS=Xenopus tropicalis OX=8364 GN=sting1 PE=2 SV=1
OG0011427	sp|Q7Z478|DHX29_HUMAN ATP-dependent RNA helicase DHX29 OS=Homo sapiens OX=9606 GN=DHX29 PE=1 SV=2
OG0011429	sp|P83472|ICI_LUMTE Chymotrypsin inhibitor OS=Lumbricus terrestris OX=6398 PE=1 SV=2
OG0011431	sp|Q9Y289|SC5A6_HUMAN Sodium-dependent multivitamin transporter OS=Homo sapiens OX=9606 GN=SLC5A6 PE=2 SV=2
OG0011436	sp|G4WAW9|SELM_ERISI Selenoprotein M OS=Eriocheir sinensis OX=95602 GN=Selenom PE=2 SV=1
OG0011440
OG0011445	sp|Q32KH7|ARSI_CANLF Arylsulfatase I OS=Canis lupus familiaris OX=9615 GN=ARSI PE=2 SV=2
OG0011446
OG0011448	sp|Q5R880|PLA2R_PONAB Secretory phospholipase A2 receptor OS=Pongo abelii OX=9601 GN=PLA2R1 PE=2 SV=2
OG0011451	sp|P84615|DCAL1_DRONO Dromaiocalcin-1 OS=Dromaius novaehollandiae OX=8790 PE=1 SV=2
OG0011453	sp|Q2TE74|PCS2_LOTJA Glutathione gamma-glutamylcysteinyltransferase 2 OS=Lotus japonicus OX=34305 GN=PCS2 PE=2 SV=2
OG0011456	sp|D4A3U0|GPR22_RAT G-protein coupled receptor 22 OS=Rattus norvegicus OX=10116 GN=Gpr22 PE=1 SV=2
OG0011458	sp|P34457|YMD3_CAEEL Putative uncharacterized transposon-derived protein F54H12.3 OS=Caenorhabditis elegans OX=6239 GN=F54H12.3 PE=5 SV=1
OG0011459	sp|Q4V8S9|BORC7_DANRE BLOC-1-related complex subunit 7 OS=Danio rerio OX=7955 GN=borcs7 PE=3 SV=1
OG0011466
OG0011473	sp|Q9BGL2|LRAT_BOVIN Lecithin retinol acyltransferase OS=Bos taurus OX=9913 GN=LRAT PE=1 SV=1
OG0011478	sp|Q9H5L6|THAP9_HUMAN DNA transposase THAP9 OS=Homo sapiens OX=9606 GN=THAP9 PE=1 SV=2
OG0011480	sp|Q60HH0|CLN3_MACFA Battenin OS=Macaca fascicularis OX=9541 GN=CLN3 PE=2 SV=1
OG0011481
OG0011489
OG0011495	sp|Q9HAR2|AGRL3_HUMAN Adhesion G protein-coupled receptor L3 OS=Homo sapiens OX=9606 GN=ADGRL3 PE=1 SV=2
OG0011522
OG0011545
OG0011553	sp|Q5TCS8|KAD9_HUMAN Adenylate kinase 9 OS=Homo sapiens OX=9606 GN=AK9 PE=1 SV=2
OG0011554	sp|P10401|POLY_DROME Retrovirus-related Pol polyprotein from transposon gypsy OS=Drosophila melanogaster OX=7227 GN=pol PE=4 SV=1
OG0011568	sp|P20825|POL2_DROME Retrovirus-related Pol polyprotein from transposon 297 OS=Drosophila melanogaster OX=7227 GN=pol PE=4 SV=1
OG0011574
OG0011685	sp|Q923Z4|FER3L_MOUSE Fer3-like protein OS=Mus musculus OX=10090 GN=Ferd3l PE=1 SV=1
OG0011695
OG0011707	sp|Q5CZC0|FSIP2_HUMAN Fibrous sheath-interacting protein 2 OS=Homo sapiens OX=9606 GN=FSIP2 PE=2 SV=4
OG0011714	sp|Q2NL98|VMAC_HUMAN Vimentin-type intermediate filament-associated coiled-coil protein OS=Homo sapiens OX=9606 GN=VMAC PE=1 SV=1
OG0011716
OG0011717	sp|Q9UBN7|HDAC6_HUMAN Histone deacetylase 6 OS=Homo sapiens OX=9606 GN=HDAC6 PE=1 SV=2
OG0011721	sp|Q8JG69|AA2DB_DANRE Alpha-2Db adrenergic receptor OS=Danio rerio OX=7955 GN=adra2db PE=3 SV=1
OG0011726	sp|Q7M429|CYTL_TACTR L-cystatin OS=Tachypleus tridentatus OX=6853 PE=1 SV=1
OG0011727	sp|P11369|LORF2_MOUSE LINE-1 retrotransposable element ORF2 protein OS=Mus musculus OX=10090 GN=Pol PE=1 SV=2
OG0011728	sp|P51942|MATN1_MOUSE Cartilage matrix protein OS=Mus musculus OX=10090 GN=Matn1 PE=2 SV=2
OG0011732	sp|P48060|GLIP1_HUMAN Glioma pathogenesis-related protein 1 OS=Homo sapiens OX=9606 GN=GLIPR1 PE=1 SV=3
OG0011733	sp|Q10137|SEC14_SCHPO Sec14 cytosolic factor OS=Schizosaccharomyces pombe (strain 972 / ATCC 24843) OX=284812 GN=sec14 PE=4 SV=1
OG0011738	sp|Q9NZJ4|SACS_HUMAN Sacsin OS=Homo sapiens OX=9606 GN=SACS PE=1 SV=2
OG0011741	sp|Q9WVH6|ANGP4_MOUSE Angiopoietin-4 OS=Mus musculus OX=10090 GN=Angpt4 PE=1 SV=1
OG0011752	sp|Q09927|ACA1_SCHPO N-acetyltransferase aca1 OS=Schizosaccharomyces pombe (strain 972 / ATCC 24843) OX=284812 GN=aca1 PE=1 SV=1
OG0011758	sp|Q9LE22|CML27_ARATH Probable calcium-binding protein CML27 OS=Arabidopsis thaliana OX=3702 GN=CML27 PE=1 SV=1
OG0011763
OG0011764	sp|Q969F8|KISSR_HUMAN KiSS-1 receptor OS=Homo sapiens OX=9606 GN=KISS1R PE=1 SV=2
OG0011768	sp|A6QLQ8|ENDOU_BOVIN Poly(U)-specific endoribonuclease OS=Bos taurus OX=9913 GN=ENDOU PE=2 SV=1
OG0011772	sp|Q7XVM8|TIR1B_ORYSJ Transport inhibitor response 1-like protein Os04g0395600 OS=Oryza sativa subsp. japonica OX=39947 GN=Os04g0395600 PE=2 SV=1
OG0011773
OG0011775	sp|P0DPX5|TX51A_SCOAL U-scoloptoxin(05)-Sa1a OS=Scolopendra alternans OX=1329349 PE=2 SV=1
OG0011780	sp|Q9VVE2|ROGDI_DROME Protein rogdi OS=Drosophila melanogaster OX=7227 GN=rogdi PE=2 SV=2
OG0011782	sp|B8JJV5|SIM13_DANRE Small integral membrane protein 13 OS=Danio rerio OX=7955 GN=smim13 PE=3 SV=1
OG0011783	sp|Q3ZCF6|APC11_BOVIN Anaphase-promoting complex subunit 11 OS=Bos taurus OX=9913 GN=ANAPC11 PE=3 SV=1
OG0011790	sp|B3A0P3|PLSP2_LOTGI Peroxidase-like protein 2 (Fragments) OS=Lottia gigantea OX=225164 PE=1 SV=1
OG0011797	sp|Q9CA34|GT17_ARATH Probable xyloglucan galactosyltransferase GT17 OS=Arabidopsis thaliana OX=3702 GN=GT17 PE=2 SV=1
OG0011800	sp|Q567C3|CA074_DANRE UPF0739 protein C1orf74 homolog OS=Danio rerio OX=7955 GN=zgc:112163 PE=2 SV=1
OG0011803	sp|Q9JHI0|MMP19_MOUSE Matrix metalloproteinase-19 OS=Mus musculus OX=10090 GN=Mmp19 PE=2 SV=1
OG0011808	sp|E9QJ05|PT117_DANRE Protein PET117 homolog, mitochondrial OS=Danio rerio OX=7955 GN=pet117 PE=3 SV=1
OG0011817	sp|Q62261|SPTB2_MOUSE Spectrin beta chain, non-erythrocytic 1 OS=Mus musculus OX=10090 GN=Sptbn1 PE=1 SV=2
OG0011821	sp|Q66KG0|S22AG_XENLA Solute carrier family 22 member 16 OS=Xenopus laevis OX=8355 GN=slc22a16 PE=2 SV=2
OG0011822	sp|F4K3M6|OTU7_ARATH OVARIAN TUMOR DOMAIN-containing deubiquitinating enzyme 7 OS=Arabidopsis thaliana OX=3702 GN=OTU7 PE=1 SV=2
OG0011829	sp|E7FDW2|PZR3B_DANRE E3 ubiquitin-protein ligase PDZRN3-B OS=Danio rerio OX=7955 GN=pdzrn3b PE=1 SV=1
OG0011836	sp|Q3T0X9|DPOD4_BOVIN DNA polymerase delta subunit 4 OS=Bos taurus OX=9913 GN=POLD4 PE=1 SV=1
OG0011838	sp|Q86YT5|S13A5_HUMAN Solute carrier family 13 member 5 OS=Homo sapiens OX=9606 GN=SLC13A5 PE=1 SV=1
OG0011839	sp|Q6ZRS2|SRCAP_HUMAN Helicase SRCAP OS=Homo sapiens OX=9606 GN=SRCAP PE=1 SV=3
OG0011851	sp|Q9H221|ABCG8_HUMAN ATP-binding cassette sub-family G member 8 OS=Homo sapiens OX=9606 GN=ABCG8 PE=1 SV=1
OG0011855	sp|B4R3W7|U729_DROSI UPF0729 protein GD16342 OS=Drosophila simulans OX=7240 GN=GD16342 PE=3 SV=1
OG0011862	sp|Q75VX8|GARE2_HUMAN GRB2-associated and regulator of MAPK protein 2 OS=Homo sapiens OX=9606 GN=GAREM2 PE=1 SV=3
OG0011870	sp|Q969Q5|RAB24_HUMAN Ras-related protein Rab-24 OS=Homo sapiens OX=9606 GN=RAB24 PE=1 SV=1
OG0011878	sp|Q0MQJ0|NDUV3_PONPY NADH dehydrogenase [ubiquinone] flavoprotein 3, mitochondrial OS=Pongo pygmaeus OX=9600 GN=NDUFV3 PE=3 SV=1
OG0011879	sp|Q6P5D8|SMHD1_MOUSE Structural maintenance of chromosomes flexible hinge domain-containing protein 1 OS=Mus musculus OX=10090 GN=Smchd1 PE=1 SV=2
OG0011882
OG0011886	sp|Q96P66|GP101_HUMAN Probable G-protein coupled receptor 101 OS=Homo sapiens OX=9606 GN=GPR101 PE=1 SV=1
OG0011888	sp|P41996|CPG2_CAEEL Chondroitin proteoglycan-2 OS=Caenorhabditis elegans OX=6239 GN=cpg-2 PE=1 SV=3
OG0011894	sp|Q9JJS0|SCUB2_MOUSE Signal peptide, CUB and EGF-like domain-containing protein 2 OS=Mus musculus OX=10090 GN=Scube2 PE=1 SV=1
OG0011897	sp|P91943|PANG1_DROME Protein pangolin, isoforms A/H/I/S OS=Drosophila melanogaster OX=7227 GN=pan PE=1 SV=1
OG0011901	sp|Q84RR2|ARI2_ARATH Probable E3 ubiquitin-protein ligase ARI2 OS=Arabidopsis thaliana OX=3702 GN=ARI2 PE=2 SV=1
OG0011902	sp|Q9Y289|SC5A6_HUMAN Sodium-dependent multivitamin transporter OS=Homo sapiens OX=9606 GN=SLC5A6 PE=2 SV=2
OG0011909
OG0011921
OG0011926
OG0011933	sp|Q9ULJ6|ZMIZ1_HUMAN Zinc finger MIZ domain-containing protein 1 OS=Homo sapiens OX=9606 GN=ZMIZ1 PE=1 SV=3
OG0011937	sp|Q8CHT6|F169B_MOUSE Protein FAM169B OS=Mus musculus OX=10090 GN=Fam169b PE=2 SV=1
OG0011939
OG0011944
OG0011945	sp|P18052|PTPRA_MOUSE Receptor-type tyrosine-protein phosphatase alpha OS=Mus musculus OX=10090 GN=Ptpra PE=1 SV=3
OG0011951
OG0011954	sp|Q9NBX4|RTXE_DROME Probable RNA-directed DNA polymerase from transposon X-element OS=Drosophila melanogaster OX=7227 GN=X-element\ORF2 PE=3 SV=1
OG0011955
OG0011956
OG0011964	sp|P51884|LUM_HUMAN Lumican OS=Homo sapiens OX=9606 GN=LUM PE=1 SV=2
OG0011965	sp|A6NJW4|LRR3C_HUMAN Leucine-rich repeat-containing protein 3C OS=Homo sapiens OX=9606 GN=LRRC3C PE=2 SV=2
OG0011970	sp|P97864|CASP7_MOUSE Caspase-7 OS=Mus musculus OX=10090 GN=Casp7 PE=1 SV=2
OG0011978	sp|Q96Q15|SMG1_HUMAN Serine/threonine-protein kinase SMG1 OS=Homo sapiens OX=9606 GN=SMG1 PE=1 SV=3
OG0011979	sp|Q9NX78|TM260_HUMAN Transmembrane protein 260 OS=Homo sapiens OX=9606 GN=TMEM260 PE=1 SV=3
OG0011985	sp|Q5SVZ6|ZMYM1_HUMAN Zinc finger MYM-type protein 1 OS=Homo sapiens OX=9606 GN=ZMYM1 PE=1 SV=1
OG0011986
OG0011988
OG0011996	sp|Q8MSU3|FRRS1_DROME Putative ferric-chelate reductase 1 homolog OS=Drosophila melanogaster OX=7227 GN=CG8399 PE=2 SV=1
OG0011999	sp|Q811G0|PTHB1_MOUSE Protein PTHB1 OS=Mus musculus OX=10090 GN=Bbs9 PE=1 SV=2
OG0012009
OG0012018
OG0012022	sp|Q86PM4|FGFR_HYDVU Fibroblast growth factor receptor OS=Hydra vulgaris OX=6087 GN=FGFR PE=2 SV=1
OG0012048
OG0012053
OG0012054
OG0012060	sp|Q26422|LFC_CARRO Limulus clotting factor C OS=Carcinoscorpius rotundicauda OX=6848 PE=2 SV=1
OG0012069	sp|Q7RTY7|OVCH1_HUMAN Ovochymase-1 OS=Homo sapiens OX=9606 GN=OVCH1 PE=2 SV=2
OG0012090
OG0012096	sp|Q9CQW3|PROZ_MOUSE Vitamin K-dependent protein Z OS=Mus musculus OX=10090 GN=Proz PE=1 SV=1
OG0012105	sp|Q5F4A1|G2E3_CHICK G2/M phase-specific E3 ubiquitin-protein ligase OS=Gallus gallus OX=9031 GN=G2E3 PE=2 SV=1
OG0012109	sp|Q108U6|MET_LOXAF Hepatocyte growth factor receptor OS=Loxodonta africana OX=9785 GN=MET PE=3 SV=1
OG0012111
OG0012114
OG0012115
OG0012256	sp|Q8CF98|COL10_MOUSE Collectin-10 OS=Mus musculus OX=10090 GN=Colec10 PE=2 SV=1
OG0012265	sp|Q09225|NRF6_CAEEL Nose resistant to fluoxetine protein 6 OS=Caenorhabditis elegans OX=6239 GN=nrf-6 PE=1 SV=3
OG0012268	sp|Q9NZ72|STMN3_HUMAN Stathmin-3 OS=Homo sapiens OX=9606 GN=STMN3 PE=1 SV=3
OG0012271
OG0012273	sp|Q7Z449|CP2U1_HUMAN Cytochrome P450 2U1 OS=Homo sapiens OX=9606 GN=CYP2U1 PE=1 SV=1
OG0012275	sp|P50281|MMP14_HUMAN Matrix metalloproteinase-14 OS=Homo sapiens OX=9606 GN=MMP14 PE=1 SV=3
OG0012276	sp|Q922B6|TRAF7_MOUSE E3 ubiquitin-protein ligase TRAF7 OS=Mus musculus OX=10090 GN=Traf7 PE=1 SV=1
OG0012284	sp|Q148C8|MIEN1_BOVIN Migration and invasion enhancer 1 OS=Bos taurus OX=9913 GN=MIEN1 PE=3 SV=1
OG0012286	sp|Q86WI3|NLRC5_HUMAN Protein NLRC5 OS=Homo sapiens OX=9606 GN=NLRC5 PE=1 SV=3
OG0012290	sp|A8E7D2|BN3D2_DANRE Pre-miRNA 5'-monophosphate methyltransferase OS=Danio rerio OX=7955 GN=bcdin3d PE=3 SV=2
OG0012291	sp|Q9BQ61|TRIR_HUMAN Telomerase RNA component interacting RNase OS=Homo sapiens OX=9606 GN=TRIR PE=1 SV=1
OG0012318
OG0012320	sp|Q47898|ASPG_ELIMR N(4)-(Beta-N-acetylglucosaminyl)-L-asparaginase OS=Elizabethkingia miricola OX=172045 PE=1 SV=1
OG0012324	sp|Q9M0X9|4CLL7_ARATH 4-coumarate--CoA ligase-like 7 OS=Arabidopsis thaliana OX=3702 GN=4CLL7 PE=1 SV=1
OG0012325	sp|P0DKM0|COA3_DROME Cytochrome c oxidase assembly factor 3, mitochondrial OS=Drosophila melanogaster OX=7227 GN=Ccdc56 PE=3 SV=1
OG0012327	sp|Q5JUR7|TEX30_HUMAN Testis-expressed protein 30 OS=Homo sapiens OX=9606 GN=TEX30 PE=2 SV=1
OG0012333	sp|Q9Y5H6|PCDA8_HUMAN Protocadherin alpha-8 OS=Homo sapiens OX=9606 GN=PCDHA8 PE=2 SV=1
OG0012335	sp|Q99715|COCA1_HUMAN Collagen alpha-1(XII) chain OS=Homo sapiens OX=9606 GN=COL12A1 PE=1 SV=2
OG0012338	sp|Q96H79|ZCCHL_HUMAN Zinc finger CCCH-type antiviral protein 1-like OS=Homo sapiens OX=9606 GN=ZC3HAV1L PE=1 SV=2
OG0012346	sp|P0DPB5|RPC22_HUMAN Protein POLR1D, isoform 2 OS=Homo sapiens OX=9606 GN=POLR1D PE=1 SV=1
OG0012359	sp|Q63931|CCKAR_CAVPO Cholecystokinin receptor type A OS=Cavia porcellus OX=10141 GN=CCKAR PE=2 SV=1
OG0012362	sp|E1BHC3|PT100_BOVIN Protein PET100 homolog, mitochondrial OS=Bos taurus OX=9913 GN=PET100 PE=3 SV=1
OG0012363	sp|Q8WTR8|NET5_HUMAN Netrin-5 OS=Homo sapiens OX=9606 GN=NTN5 PE=2 SV=2
OG0012376	sp|I6LDA6|GPMI_ONCVO 2,3-bisphosphoglycerate-independent phosphoglycerate mutase OS=Onchocerca volvulus OX=6282 GN=ipgm-1 PE=1 SV=1
OG0012378	sp|O43314|VIP2_HUMAN Inositol hexakisphosphate and diphosphoinositol-pentakisphosphate kinase 2 OS=Homo sapiens OX=9606 GN=PPIP5K2 PE=1 SV=3
OG0012379	sp|Q9D8T0|FAM3A_MOUSE Protein FAM3A OS=Mus musculus OX=10090 GN=Fam3a PE=2 SV=1
OG0012380	sp|Q9NUZ1|ACOXL_HUMAN Acyl-coenzyme A oxidase-like protein OS=Homo sapiens OX=9606 GN=ACOXL PE=2 SV=3
OG0012386	sp|Q9NQ36|SCUB2_HUMAN Signal peptide, CUB and EGF-like domain-containing protein 2 OS=Homo sapiens OX=9606 GN=SCUBE2 PE=1 SV=3
OG0012387	sp|Q9H6X4|TM134_HUMAN Transmembrane protein 134 OS=Homo sapiens OX=9606 GN=TMEM134 PE=1 SV=1
OG0012392	sp|Q9XF67|PDPK1_ARATH 3-phosphoinositide-dependent protein kinase 1 OS=Arabidopsis thaliana OX=3702 GN=PDPK1 PE=1 SV=1
OG0012394	sp|F1MDB2|SIM20_BOVIN Small integral membrane protein 20 OS=Bos taurus OX=9913 GN=SMIM20 PE=1 SV=2
OG0012398	sp|Q9NPP4|NLRC4_HUMAN NLR family CARD domain-containing protein 4 OS=Homo sapiens OX=9606 GN=NLRC4 PE=1 SV=2
OG0012399	sp|Q8AV58|SDK1_CHICK Protein sidekick-1 OS=Gallus gallus OX=9031 GN=SDK1 PE=1 SV=1
OG0012408	sp|Q6DCX5|PCFT_XENLA Proton-coupled folate transporter OS=Xenopus laevis OX=8355 GN=slc46a1 PE=2 SV=1
OG0012413
OG0012414
OG0012415	sp|O86938|PPD_STRVT Phosphonopyruvate decarboxylase OS=Streptomyces viridochromogenes (strain DSM 40736 / JCM 4977 / BCRC 1201 / Tue 494) OX=591159 GN=ppd PE=3 SV=1
OG0012420	sp|Q6PEZ8|PONL1_HUMAN Podocan-like protein 1 OS=Homo sapiens OX=9606 GN=PODNL1 PE=2 SV=2
OG0012422	sp|Q9HGM9|DNJC7_SCHPO DnaJ homolog subfamily C member 7 homolog OS=Schizosaccharomyces pombe (strain 972 / ATCC 24843) OX=284812 GN=SPBC543.02c PE=4 SV=1
OG0012426	sp|Q54VC0|Y9865_DICDI Probable serine/threonine-protein kinase DDB_G0280461 OS=Dictyostelium discoideum OX=44689 GN=DDB_G0280461 PE=3 SV=1
OG0012428	sp|Q9UGM3|DMBT1_HUMAN Deleted in malignant brain tumors 1 protein OS=Homo sapiens OX=9606 GN=DMBT1 PE=1 SV=2
OG0012435	sp|Q16974|KPC1_APLCA Calcium-dependent protein kinase C OS=Aplysia californica OX=6500 GN=PRKC1 PE=1 SV=2
OG0012436	sp|P0DM41|ACT1_CAEEL Actin-1 OS=Caenorhabditis elegans OX=6239 GN=act-1 PE=1 SV=1
OG0012444	sp|Q9HC58|NCKX3_HUMAN Sodium/potassium/calcium exchanger 3 OS=Homo sapiens OX=9606 GN=SLC24A3 PE=2 SV=4
OG0012446	sp|P28606|Y1628_SYNP2 Uncharacterized protein SYNPCC7002_A1628 OS=Synechococcus sp. (strain ATCC 27264 / PCC 7002 / PR-6) OX=32049 GN=SYNPCC7002_A1628 PE=3 SV=2
OG0012448	sp|O01812|FABP6_CAEEL Fatty acid-binding protein homolog 6 OS=Caenorhabditis elegans OX=6239 GN=lbp-6 PE=1 SV=1
OG0012455	sp|Q8N2G6|ZCH24_HUMAN Zinc finger CCHC domain-containing protein 24 OS=Homo sapiens OX=9606 GN=ZCCHC24 PE=1 SV=1
OG0012466	sp|Q92628|K0232_HUMAN Uncharacterized protein KIAA0232 OS=Homo sapiens OX=9606 GN=KIAA0232 PE=1 SV=5
OG0012476
OG0012477	sp|Q32KX5|LRC28_BOVIN Leucine-rich repeat-containing protein 28 OS=Bos taurus OX=9913 GN=LRRC28 PE=2 SV=1
OG0012481	sp|Q5RBR6|SPRY3_PONAB SPRY domain-containing protein 3 OS=Pongo abelii OX=9601 GN=SPRYD3 PE=2 SV=1
OG0012482	sp|Q7N8M2|METN_PHOLL Methionine import ATP-binding protein MetN OS=Photorhabdus laumondii subsp. laumondii (strain DSM 15139 / CIP 105565 / TT01) OX=243265 GN=metN PE=3 SV=1
OG0012487	sp|Q9NFZ3|GBGE_DROME Guanine nucleotide-binding protein subunit gamma-e OS=Drosophila melanogaster OX=7227 GN=Ggamma30A PE=1 SV=1
OG0012491	sp|Q95LI3|ZFY_BOVIN Zinc finger Y-chromosomal protein OS=Bos taurus OX=9913 GN=ZFY PE=2 SV=1
OG0012492	sp|Q7KRW1|TRC8_DROME Protein TRC8 homolog OS=Drosophila melanogaster OX=7227 GN=Trc8 PE=1 SV=1
OG0012496	sp|E9Q0N2|PTPRH_MOUSE Receptor-type tyrosine-protein phosphatase H OS=Mus musculus OX=10090 GN=Ptprh PE=1 SV=1
OG0012497
OG0012503	sp|Q9QUK6|TLR4_MOUSE Toll-like receptor 4 OS=Mus musculus OX=10090 GN=Tlr4 PE=1 SV=1
OG0012506
OG0012514
OG0012516	sp|A8FHS1|PPAX_BACP2 Pyrophosphatase PpaX OS=Bacillus pumilus (strain SAFR-032) OX=315750 GN=ppaX PE=3 SV=1
OG0012518	sp|P11873|HMGC_TETTH High mobility group protein C OS=Tetrahymena thermophila OX=5911 PE=1 SV=1
OG0012520	sp|Q96BM0|I27L1_HUMAN Interferon alpha-inducible protein 27-like protein 1 OS=Homo sapiens OX=9606 GN=IFI27L1 PE=1 SV=1
OG0012526	sp|P49023|PAXI_HUMAN Paxillin OS=Homo sapiens OX=9606 GN=PXN PE=1 SV=3
OG0012530	sp|Q9I926|FUCL6_ANGJA Fucolectin-6 OS=Anguilla japonica OX=7937 PE=2 SV=1
OG0012531	sp|Q7M3K2|PELET_DROME Transposable element P transposase OS=Drosophila melanogaster OX=7227 GN=T PE=1 SV=2
OG0012542	sp|Q09575|YRD6_CAEEL Uncharacterized protein K02A2.6 OS=Caenorhabditis elegans OX=6239 GN=K02A2.6 PE=4 SV=1
OG0012553	sp|P31007|DLG1_DROME Disks large 1 tumor suppressor protein OS=Drosophila melanogaster OX=7227 GN=dlg1 PE=1 SV=2
OG0012556	sp|Q93075|TATD2_HUMAN Putative deoxyribonuclease TATDN2 OS=Homo sapiens OX=9606 GN=TATDN2 PE=1 SV=2
OG0012561
OG0012565	sp|Q76CA1|GIG1_STIGI OMEGA-stichotoxin-Sgt1a OS=Stichodactyla gigantea OX=230562 PE=1 SV=1
OG0012566
OG0012569	sp|Q9Y6X6|MYO16_HUMAN Unconventional myosin-XVI OS=Homo sapiens OX=9606 GN=MYO16 PE=1 SV=3
OG0012571
OG0012574	sp|Q7KW14|CCDCX_DROME Coiled-coil domain-containing protein CG32809 OS=Drosophila melanogaster OX=7227 GN=CG32809 PE=2 SV=1
OG0012582
OG0012589	sp|P15594|RTP2_TRYBG Retrotransposable element SLACS 132 kDa protein OS=Trypanosoma brucei gambiense OX=31285 PE=4 SV=1
OG0012591	sp|Q66JL1|TBX6_XENTR T-box transcription factor TBX6 OS=Xenopus tropicalis OX=8364 GN=tbx6 PE=2 SV=1
OG0012592
OG0012593	sp|Q66S13|NATT4_THANI Natterin-4 OS=Thalassophryne nattereri OX=289382 PE=2 SV=1
OG0012594	sp|Q7JK24|B3GT1_GORGO Beta-1,3-galactosyltransferase 1 OS=Gorilla gorilla gorilla OX=9595 GN=B3GALT1 PE=3 SV=1
OG0012596	sp|Q868Z9|PPN_DROME Papilin OS=Drosophila melanogaster OX=7227 GN=Ppn PE=1 SV=2
OG0012601
OG0012608	sp|Q5TA89|HES5_HUMAN Transcription factor HES-5 OS=Homo sapiens OX=9606 GN=HES5 PE=2 SV=1
OG0012614	sp|O43760|SNG2_HUMAN Synaptogyrin-2 OS=Homo sapiens OX=9606 GN=SYNGR2 PE=1 SV=1
OG0012617	sp|Q96DM1|PGBD4_HUMAN PiggyBac transposable element-derived protein 4 OS=Homo sapiens OX=9606 GN=PGBD4 PE=2 SV=3
OG0012619	sp|Q9UPQ0|LIMC1_HUMAN LIM and calponin homology domains-containing protein 1 OS=Homo sapiens OX=9606 GN=LIMCH1 PE=1 SV=4
OG0012623	sp|Q27433|MEC2_CAEEL Mechanosensory protein 2 OS=Caenorhabditis elegans OX=6239 GN=mec-2 PE=1 SV=1
OG0012625	sp|Q6R2W3|SCND3_HUMAN SCAN domain-containing protein 3 OS=Homo sapiens OX=9606 GN=ZBED9 PE=2 SV=1
OG0012637
OG0012639	sp|P02712|ACHB_TETCF Acetylcholine receptor subunit beta OS=Tetronarce californica OX=7787 GN=CHRNB1 PE=1 SV=1
OG0012640	sp|Q6ZRK6|CCD73_HUMAN Coiled-coil domain-containing protein 73 OS=Homo sapiens OX=9606 GN=CCDC73 PE=2 SV=2
OG0012659
OG0012668
OG0012673
OG0012681	sp|Q9NQS3|NECT3_HUMAN Nectin-3 OS=Homo sapiens OX=9606 GN=NECTIN3 PE=1 SV=1
OG0012684	sp|Q9H6B1|Z385D_HUMAN Zinc finger protein 385D OS=Homo sapiens OX=9606 GN=ZNF385D PE=2 SV=1
OG0012713	sp|Q8H1F7|IPK_ARATH Isopentenyl phosphate kinase OS=Arabidopsis thaliana OX=3702 GN=IPK PE=1 SV=1
OG0012742
OG0012743	sp|Q8CA95|PDE10_MOUSE cAMP and cAMP-inhibited cGMP 3',5'-cyclic phosphodiesterase 10A OS=Mus musculus OX=10090 GN=Pde10a PE=1 SV=2
OG0012752
OG0012753	sp|Q96J84|KIRR1_HUMAN Kin of IRRE-like protein 1 OS=Homo sapiens OX=9606 GN=KIRREL1 PE=1 SV=2
OG0012901	sp|P24043|LAMA2_HUMAN Laminin subunit alpha-2 OS=Homo sapiens OX=9606 GN=LAMA2 PE=1 SV=4
OG0012905
OG0012907	sp|Q62283|TSN7_MOUSE Tetraspanin-7 OS=Mus musculus OX=10090 GN=Tspan7 PE=1 SV=2
OG0012910	sp|Q9ESR9|ABCA2_RAT ATP-binding cassette sub-family A member 2 OS=Rattus norvegicus OX=10116 GN=Abca2 PE=1 SV=1
OG0012911	sp|Q9UKS7|IKZF2_HUMAN Zinc finger protein Helios OS=Homo sapiens OX=9606 GN=IKZF2 PE=1 SV=2
OG0012926	sp|Q9VVH9|SO74D_DROME Solute carrier organic anion transporter family member 74D OS=Drosophila melanogaster OX=7227 GN=Oatp74D PE=2 SV=2
OG0012930	sp|Q9Y275|TN13B_HUMAN Tumor necrosis factor ligand superfamily member 13B OS=Homo sapiens OX=9606 GN=TNFSF13B PE=1 SV=1
OG0012935	sp|Q40302|CALM_MACPY Calmodulin OS=Macrocystis pyrifera OX=35122 PE=2 SV=3
OG0012937
OG0012946	sp|Q8IZJ3|CPMD8_HUMAN C3 and PZP-like alpha-2-macroglobulin domain-containing protein 8 OS=Homo sapiens OX=9606 GN=CPAMD8 PE=1 SV=2
OG0012947	sp|Q9I8C7|ACH10_CHICK Neuronal acetylcholine receptor subunit alpha-10 OS=Gallus gallus OX=9031 GN=CHRNA10 PE=3 SV=1
OG0012956	sp|Q9SYI2|AB3B_ARATH ABC transporter B family member 3 OS=Arabidopsis thaliana OX=3702 GN=ABCB3 PE=3 SV=1
OG0012965	sp|Q7TXL9|PPSB_MYCBO Phthiocerol/phenolphthiocerol synthesis polyketide synthase type I PpsB OS=Mycobacterium bovis (strain ATCC BAA-935 / AF2122/97) OX=233413 GN=ppsB PE=1 SV=1
OG0012971	sp|Q9BYK8|HELZ2_HUMAN Helicase with zinc finger domain 2 OS=Homo sapiens OX=9606 GN=HELZ2 PE=1 SV=6
OG0012973	sp|Q02377|NDUA1_BOVIN NADH dehydrogenase [ubiquinone] 1 alpha subcomplex subunit 1 OS=Bos taurus OX=9913 GN=NDUFA1 PE=1 SV=1
OG0012976	sp|Q8BK48|EST2E_MOUSE Pyrethroid hydrolase Ces2e OS=Mus musculus OX=10090 GN=Ces2e PE=1 SV=1
OG0012978	sp|Q9W3T5|SMIM4_DROME Small integral membrane protein 4 OS=Drosophila melanogaster OX=7227 GN=CG32736 PE=3 SV=1
OG0012980	sp|Q54VI1|FHKE_DICDI Probable serine/threonine-protein kinase fhkE OS=Dictyostelium discoideum OX=44689 GN=fhkE PE=3 SV=1
OG0012983
OG0012993	sp|Q91XU7|CDHR1_RAT Cadherin-related family member 1 OS=Rattus norvegicus OX=10116 GN=Cdhr1 PE=2 SV=1
OG0012994	sp|Q9BKU8|MOAG4_CAEEL Modifier of protein aggregation 4 OS=Caenorhabditis elegans OX=6239 GN=moag-4 PE=1 SV=1
OG0013000
OG0013001	sp|Q95000|CHLE1_BRALA Cholinesterase 1 (Fragment) OS=Branchiostoma lanceolatum OX=7740 GN=CHE1 PE=3 SV=1
OG0013005	sp|Q8K078|SO4A1_MOUSE Solute carrier organic anion transporter family member 4A1 OS=Mus musculus OX=10090 GN=Slco4a1 PE=1 SV=2
OG0013006	sp|Q460N5|PAR14_HUMAN Protein mono-ADP-ribosyltransferase PARP14 OS=Homo sapiens OX=9606 GN=PARP14 PE=1 SV=3
OG0013007	sp|Q9J516|V219_FOWPN Putative ankyrin repeat protein FPV219 OS=Fowlpox virus (strain NVSL) OX=928301 GN=FPV219 PE=4 SV=1
OG0013009	sp|Q9GYQ4|GCY8_CAEEL Receptor-type guanylate cyclase gcy-8 OS=Caenorhabditis elegans OX=6239 GN=gcy-8 PE=1 SV=2
OG0013011	sp|Q75WE7|VWA5A_RAT von Willebrand factor A domain-containing protein 5A OS=Rattus norvegicus OX=10116 GN=Vwa5a PE=2 SV=1
OG0013012	sp|Q568W0|SELW_DANRE Selenoprotein W OS=Danio rerio OX=7955 GN=selenow PE=3 SV=3
OG0013013	sp|Q9H079|KTBL1_HUMAN KATNB1-like protein 1 OS=Homo sapiens OX=9606 GN=KATNBL1 PE=1 SV=1
OG0013014
OG0013017	sp|Q5RCH1|CDK1_PONAB Cyclin-dependent kinase 1 OS=Pongo abelii OX=9601 GN=CDK1 PE=2 SV=1
OG0013020	sp|P24733|MYS_ARGIR Myosin heavy chain, striated muscle OS=Argopecten irradians OX=31199 PE=1 SV=1
OG0013030
OG0013031	sp|Q8CAF4|NHSL1_MOUSE NHS-like protein 1 OS=Mus musculus OX=10090 GN=Nhsl1 PE=1 SV=3
OG0013038	sp|O00468|AGRIN_HUMAN Agrin OS=Homo sapiens OX=9606 GN=AGRN PE=1 SV=6
OG0013039
OG0013040	sp|Q8N9V3|WSDU1_HUMAN WD repeat, SAM and U-box domain-containing protein 1 OS=Homo sapiens OX=9606 GN=WDSUB1 PE=1 SV=3
OG0013041	sp|Q99MV1|TDRD1_MOUSE Tudor domain-containing protein 1 OS=Mus musculus OX=10090 GN=Tdrd1 PE=1 SV=2
OG0013046	sp|Q06317|PBP4_AMYLA Penicillin-binding protein 4 OS=Amycolatopsis lactamdurans OX=1913 GN=pbp PE=3 SV=1
OG0013053	sp|Q61548|AP180_MOUSE Clathrin coat assembly protein AP180 OS=Mus musculus OX=10090 GN=Snap91 PE=1 SV=1
OG0013060	sp|Q49LS8|XKR6_TETNG XK-related protein 6 OS=Tetraodon nigroviridis OX=99883 GN=xkr6 PE=2 SV=1
OG0013068
OG0013069
OG0013078	sp|Q6DJN2|TRF6B_XENLA TNF receptor-associated factor 6-B OS=Xenopus laevis OX=8355 GN=traf6-b PE=2 SV=1
OG0013082
OG0013084	sp|A5WVU9|TRIQK_DANRE Triple QxxK/R motif-containing protein OS=Danio rerio OX=7955 GN=triqk PE=2 SV=1
OG0013087	sp|P58557|YBEY_HUMAN Endoribonuclease YbeY OS=Homo sapiens OX=9606 GN=YBEY PE=1 SV=2
OG0013090	sp|Q9BVV6|TALD3_HUMAN Protein TALPID3 OS=Homo sapiens OX=9606 GN=KIAA0586 PE=1 SV=4
OG0013091	sp|Q9Z0Y8|CAC1I_RAT Voltage-dependent T-type calcium channel subunit alpha-1I OS=Rattus norvegicus OX=10116 GN=Cacna1i PE=1 SV=3
OG0013092	sp|Q9NZN5|ARHGC_HUMAN Rho guanine nucleotide exchange factor 12 OS=Homo sapiens OX=9606 GN=ARHGEF12 PE=1 SV=1
OG0013094	sp|P24721|ASGR2_MOUSE Asialoglycoprotein receptor 2 OS=Mus musculus OX=10090 GN=Asgr2 PE=1 SV=1
OG0013098
OG0013102	sp|Q8N2E2|VWDE_HUMAN von Willebrand factor D and EGF domain-containing protein OS=Homo sapiens OX=9606 GN=VWDE PE=2 SV=4
OG0013107	sp|Q17895|MNM2_CAEEL Zinc finger protein mnm-2 OS=Caenorhabditis elegans OX=6239 GN=mnm-2 PE=1 SV=2
OG0013109	sp|P56839|PEPM_MYTED Phosphoenolpyruvate phosphomutase OS=Mytilus edulis OX=6550 PE=1 SV=3
OG0013111	sp|Q40302|CALM_MACPY Calmodulin OS=Macrocystis pyrifera OX=35122 PE=2 SV=3
OG0013120	sp|Q9QXL2|KI21A_MOUSE Kinesin-like protein KIF21A OS=Mus musculus OX=10090 GN=Kif21a PE=1 SV=2
OG0013124	sp|Q6P3W7|SCYL2_HUMAN SCY1-like protein 2 OS=Homo sapiens OX=9606 GN=SCYL2 PE=1 SV=1
OG0013126
OG0013131
OG0013134	sp|P91621|SIF1_DROME Protein still life, isoform SIF type 1 OS=Drosophila melanogaster OX=7227 GN=sif PE=2 SV=2
OG0013136	sp|P23515|OMGP_HUMAN Oligodendrocyte-myelin glycoprotein OS=Homo sapiens OX=9606 GN=OMG PE=1 SV=2
OG0013137	sp|Q5NCC9|TRI58_MOUSE E3 ubiquitin-protein ligase TRIM58 OS=Mus musculus OX=10090 GN=Trim58 PE=2 SV=1
OG0013142
OG0013147
OG0013156	sp|Q9LTZ9|GALS2_ARATH Galactan beta-1,4-galactosyltransferase GALS2 OS=Arabidopsis thaliana OX=3702 GN=GALS2 PE=2 SV=1
OG0013162
OG0013165	sp|P39678|MBP1_YEAST Transcription factor MBP1 OS=Saccharomyces cerevisiae (strain ATCC 204508 / S288c) OX=559292 GN=MBP1 PE=1 SV=1
OG0013169
OG0013178	sp|Q90X46|GP161_DANRE G-protein coupled receptor 161 OS=Danio rerio OX=7955 GN=gpr161 PE=2 SV=2
OG0013185	sp|Q9I7U4|TITIN_DROME Titin OS=Drosophila melanogaster OX=7227 GN=sls PE=1 SV=3
OG0013190	sp|Q9J513|V222_FOWPN Putative ankyrin repeat protein FPV222 OS=Fowlpox virus (strain NVSL) OX=928301 GN=FPV222 PE=4 SV=1
OG0013191	sp|Q04202|TCB2_CAEBR Transposable element Tcb2 transposase OS=Caenorhabditis briggsae OX=6238 PE=3 SV=1
OG0013195
OG0013199	sp|Q9UNY5|ZN232_HUMAN Zinc finger protein 232 OS=Homo sapiens OX=9606 GN=ZNF232 PE=1 SV=1
OG0013206
OG0013209	sp|Q8IVT2|MISP_HUMAN Mitotic interactor and substrate of PLK1 OS=Homo sapiens OX=9606 GN=MISP PE=1 SV=1
OG0013216	sp|Q98919|LSAMP_CHICK Limbic system-associated membrane protein OS=Gallus gallus OX=9031 PE=2 SV=1
OG0013218
OG0013224
OG0013229	sp|Q0VDD8|DYH14_HUMAN Dynein heavy chain 14, axonemal OS=Homo sapiens OX=9606 GN=DNAH14 PE=2 SV=3
OG0013230	sp|Q9SSM3|JAL19_ARATH Jacalin-related lectin 19 OS=Arabidopsis thaliana OX=3702 GN=JAL19 PE=2 SV=1
OG0013231
OG0013232	sp|Q9UBM4|OPT_HUMAN Opticin OS=Homo sapiens OX=9606 GN=OPTC PE=1 SV=1
OG0013233	sp|Q8IZ08|GP135_HUMAN G-protein coupled receptor 135 OS=Homo sapiens OX=9606 GN=GPR135 PE=1 SV=2
OG0013235
OG0013237
OG0013238
OG0013239	sp|Q87PP5|BCCT1_VIBPA Glycine betaine/proline/choline/ectoine transporter VP1456 OS=Vibrio parahaemolyticus serotype O3:K6 (strain RIMD 2210633) OX=223926 GN=VP1456 PE=1 SV=1
OG0013241	sp|Q63184|E2AK2_RAT Interferon-induced, double-stranded RNA-activated protein kinase OS=Rattus norvegicus OX=10116 GN=Eif2ak2 PE=1 SV=1
OG0013243	sp|Q9VW71|FAT2_DROME Fat-like cadherin-related tumor suppressor homolog OS=Drosophila melanogaster OX=7227 GN=kug PE=2 SV=3
OG0013247	sp|P86810|OXLA_SIGCA L-amino-acid oxidase OS=Siganus canaliculatus OX=75042 PE=1 SV=2
OG0013249
OG0013250	sp|Q9WVM6|TLL2_MOUSE Tolloid-like protein 2 OS=Mus musculus OX=10090 GN=Tll2 PE=1 SV=1
OG0013251	sp|Q9QUN7|TLR2_MOUSE Toll-like receptor 2 OS=Mus musculus OX=10090 GN=Tlr2 PE=1 SV=1
OG0013253	sp|Q9EPQ1|TLR1_MOUSE Toll-like receptor 1 OS=Mus musculus OX=10090 GN=Tlr1 PE=1 SV=1
OG0013256	sp|Q6DDP3|ENPP6_XENLA Glycerophosphocholine cholinephosphodiesterase ENPP6 OS=Xenopus laevis OX=8355 GN=enpp6 PE=2 SV=1
OG0013257	sp|Q5M934|TRUB1_RAT Probable tRNA pseudouridine synthase 1 OS=Rattus norvegicus OX=10116 GN=Trub1 PE=2 SV=1
OG0013259
OG0013268
OG0013272	sp|Q24799|MYPH_ECHGR Myophilin OS=Echinococcus granulosus OX=6210 PE=2 SV=1
OG0013276	sp|Q9DB41|GHC2_MOUSE Mitochondrial glutamate carrier 2 OS=Mus musculus OX=10090 GN=Slc25a18 PE=1 SV=4
OG0013280
OG0013282	sp|P0C6B8|SVEP1_RAT Sushi, von Willebrand factor type A, EGF and pentraxin domain-containing protein 1 OS=Rattus norvegicus OX=10116 GN=Svep1 PE=1 SV=1
OG0013286
OG0013287	sp|P24470|CP2CN_RAT Cytochrome P450 2C23 OS=Rattus norvegicus OX=10116 GN=Cyp2c23 PE=2 SV=2
OG0013288
OG0013298	sp|Q40302|CALM_MACPY Calmodulin OS=Macrocystis pyrifera OX=35122 PE=2 SV=3
OG0013304	sp|Q8N9L1|ZIC4_HUMAN Zinc finger protein ZIC 4 OS=Homo sapiens OX=9606 GN=ZIC4 PE=2 SV=3
OG0013307
OG0013311
OG0013317	sp|Q04721|NOTC2_HUMAN Neurogenic locus notch homolog protein 2 OS=Homo sapiens OX=9606 GN=NOTCH2 PE=1 SV=3
OG0013323
OG0013326
OG0013332	sp|Q9V8P9|TOPRS_DROME E3 ubiquitin-protein ligase Topors OS=Drosophila melanogaster OX=7227 GN=Topors PE=1 SV=1
OG0013333	sp|P34257|TC3A_CAEEL Transposable element Tc3 transposase OS=Caenorhabditis elegans OX=6239 GN=tc3a PE=1 SV=1
OG0013334	sp|O22255|ATL64_ARATH RING-H2 finger protein ATL64 OS=Arabidopsis thaliana OX=3702 GN=ATL64 PE=2 SV=1
OG0013353	sp|Q5R6R1|EYS_PONAB Protein eyes shut homolog OS=Pongo abelii OX=9601 GN=EYS PE=2 SV=3
OG0013366	sp|P10401|POLY_DROME Retrovirus-related Pol polyprotein from transposon gypsy OS=Drosophila melanogaster OX=7227 GN=pol PE=4 SV=1
OG0013395
OG0013420	sp|O75334|LIPA2_HUMAN Liprin-alpha-2 OS=Homo sapiens OX=9606 GN=PPFIA2 PE=1 SV=2
OG0013423	sp|V5NAL9|TLR4_PINIB Toll-like receptor 4 OS=Pinctada imbricata OX=66713 PE=2 SV=1
OG0013444
OG0013445	sp|P09082|GSB_DROME Protein gooseberry OS=Drosophila melanogaster OX=7227 GN=gsb PE=2 SV=1
OG0013454
OG0013669	sp|P11018|ISP1_BACSU Major intracellular serine protease OS=Bacillus subtilis (strain 168) OX=224308 GN=isp PE=1 SV=2
OG0013670	sp|Q96PQ7|KLHL5_HUMAN Kelch-like protein 5 OS=Homo sapiens OX=9606 GN=KLHL5 PE=1 SV=3
OG0013672	sp|O42411|IOD1_CHICK Type I iodothyronine deiodinase (Fragment) OS=Gallus gallus OX=9031 GN=DIO1 PE=2 SV=3
OG0013676
OG0013710	sp|L0R8F8|MIDUO_HUMAN MIEF1 upstream open reading frame protein OS=Homo sapiens OX=9606 GN=MIEF1 PE=1 SV=1
OG0013715	sp|O43451|MGA_HUMAN Maltase-glucoamylase, intestinal OS=Homo sapiens OX=9606 GN=MGAM PE=1 SV=5
OG0013734	sp|Q9VYD1|C1716_DROME Probable histone-lysine N-methyltransferase CG1716 OS=Drosophila melanogaster OX=7227 GN=Set2 PE=1 SV=2
OG0013744	sp|Q9Z148|EHMT2_MOUSE Histone-lysine N-methyltransferase EHMT2 OS=Mus musculus OX=10090 GN=Ehmt2 PE=1 SV=2
OG0013746	sp|Q91VN0|LRP5_MOUSE Low-density lipoprotein receptor-related protein 5 OS=Mus musculus OX=10090 GN=Lrp5 PE=1 SV=3
OG0013748	sp|Q9D992|MAJIN_MOUSE Membrane-anchored junction protein OS=Mus musculus OX=10090 GN=Majin PE=1 SV=2
OG0013755	sp|Q6EMK4|VASN_HUMAN Vasorin OS=Homo sapiens OX=9606 GN=VASN PE=1 SV=1
OG0013761	sp|Q05118|PO23_POPJA Retrovirus-related Pol polyprotein from type-1 retrotransposable element R2 (Fragment) OS=Popillia japonica OX=7064 PE=4 SV=1
OG0013763	sp|Q9N0E3|RTN4R_MACFA Reticulon-4 receptor OS=Macaca fascicularis OX=9541 GN=RTN4R PE=2 SV=1
OG0013771	sp|Q9Y2F5|ICE1_HUMAN Little elongation complex subunit 1 OS=Homo sapiens OX=9606 GN=ICE1 PE=1 SV=5
OG0013773	sp|Q99N28|CADM3_MOUSE Cell adhesion molecule 3 OS=Mus musculus OX=10090 GN=Cadm3 PE=1 SV=1
OG0013775	sp|Q95SX7|RTBS_DROME Probable RNA-directed DNA polymerase from transposon BS OS=Drosophila melanogaster OX=7227 GN=RTase PE=2 SV=1
OG0013778	sp|Q8CJ11|AGRG2_RAT Adhesion G-protein coupled receptor G2 OS=Rattus norvegicus OX=10116 GN=Adgrg2 PE=1 SV=1
OG0013781	sp|Q9VCA2|ORCT_DROME Organic cation transporter protein OS=Drosophila melanogaster OX=7227 GN=Orct PE=1 SV=1
OG0013783
OG0013785	sp|P15918|RAG1_HUMAN V(D)J recombination-activating protein 1 OS=Homo sapiens OX=9606 GN=RAG1 PE=1 SV=2
OG0013795	sp|Q5ZHN5|THAP5_CHICK THAP domain-containing protein 5 OS=Gallus gallus OX=9031 GN=THAP5 PE=2 SV=1
OG0013796
OG0013799	sp|Q02977|YRK_CHICK Proto-oncogene tyrosine-protein kinase Yrk OS=Gallus gallus OX=9031 GN=YRK PE=2 SV=2
OG0013803	sp|Q32LP2|RADI_BOVIN Radixin OS=Bos taurus OX=9913 GN=RDX PE=2 SV=1
OG0013806	sp|A8MV24|CQ098_HUMAN Uncharacterized protein C17orf98 OS=Homo sapiens OX=9606 GN=C17orf98 PE=4 SV=1
OG0013809	sp|Q9Y289|SC5A6_HUMAN Sodium-dependent multivitamin transporter OS=Homo sapiens OX=9606 GN=SLC5A6 PE=2 SV=2
OG0013810
OG0013812	sp|Q8LHH9|SHL2_ORYSJ Probable RNA-dependent RNA polymerase SHL2 OS=Oryza sativa subsp. japonica OX=39947 GN=SHL2 PE=2 SV=1
OG0013816	sp|Q91987|NTRK2_CHICK BDNF/NT-3 growth factors receptor OS=Gallus gallus OX=9031 GN=NTRK2 PE=1 SV=1
OG0013820	sp|O02751|CFDP2_BOVIN Craniofacial development protein 2 OS=Bos taurus OX=9913 GN=CFDP2 PE=1 SV=2
OG0013822
OG0013826	sp|Q17LW0|MYO7A_AEDAE Myosin-VIIa OS=Aedes aegypti OX=7159 GN=ck PE=3 SV=1
OG0013833
OG0013835
OG0013836
OG0013837	sp|Q26636|CATL_SARPE Cathepsin L OS=Sarcophaga peregrina OX=7386 PE=1 SV=1
OG0013838	sp|Q8VC88|GRAN_MOUSE Grancalcin OS=Mus musculus OX=10090 GN=Gca PE=1 SV=1
OG0013839
OG0013840	sp|Q8VQK6|Y1033_BRUAB Putative peptide import ATP-binding protein BruAb2_1033 OS=Brucella abortus biovar 1 (strain 9-941) OX=262698 GN=BruAb2_1033 PE=3 SV=1
OG0013852
OG0013854	sp|Q80T79|CSMD3_MOUSE CUB and sushi domain-containing protein 3 OS=Mus musculus OX=10090 GN=Csmd3 PE=1 SV=3
OG0013860	sp|A8PU71|SDHF1_BOVIN Succinate dehydrogenase assembly factor 1, mitochondrial OS=Bos taurus OX=9913 GN=SDHAF1 PE=3 SV=1
OG0013861	sp|P35992|PTP10_DROME Tyrosine-protein phosphatase 10D OS=Drosophila melanogaster OX=7227 GN=Ptp10D PE=1 SV=4
OG0013865	sp|Q9JIS1|RIMS2_RAT Regulating synaptic membrane exocytosis protein 2 OS=Rattus norvegicus OX=10116 GN=Rims2 PE=1 SV=1
OG0013866	sp|P51905|SC6A4_DROME Sodium-dependent serotonin transporter OS=Drosophila melanogaster OX=7227 GN=SerT PE=2 SV=1
OG0013886
OG0013887	sp|Q8IVL1|NAV2_HUMAN Neuron navigator 2 OS=Homo sapiens OX=9606 GN=NAV2 PE=1 SV=3
OG0013893	sp|Q923Y0|TAA8C_RAT Trace amine-associated receptor 8c OS=Rattus norvegicus OX=10116 GN=Taar8c PE=3 SV=1
OG0013897	sp|P79098|AMPN_BOVIN Aminopeptidase N OS=Bos taurus OX=9913 GN=ANPEP PE=2 SV=4
OG0013900	sp|Q9HAS3|S28A3_HUMAN Solute carrier family 28 member 3 OS=Homo sapiens OX=9606 GN=SLC28A3 PE=1 SV=1
OG0013901	sp|P53004|BIEA_HUMAN Biliverdin reductase A OS=Homo sapiens OX=9606 GN=BLVRA PE=1 SV=2
OG0013903	sp|Q9U8W7|TL5B_TACTR Techylectin-5B OS=Tachypleus tridentatus OX=6853 PE=1 SV=1
OG0013904
OG0013907	sp|P84052|H2A_DROER Histone H2A OS=Drosophila erecta OX=7220 GN=His2A PE=3 SV=2
OG0013911	sp|Q7RTY0|MOT13_HUMAN Monocarboxylate transporter 13 OS=Homo sapiens OX=9606 GN=SLC16A13 PE=1 SV=1
OG0013912	sp|P40954|CHI3_CANAL Chitinase 3 OS=Candida albicans (strain SC5314 / ATCC MYA-2876) OX=237561 GN=CHT3 PE=1 SV=2
OG0013916	sp|P56381|ATP5E_HUMAN ATP synthase subunit epsilon, mitochondrial OS=Homo sapiens OX=9606 GN=ATP5F1E PE=1 SV=2
OG0013923
OG0013926
OG0013929
OG0013930	sp|P42942|YG4I_YEAST Uncharacterized GTP-binding protein YGR210C OS=Saccharomyces cerevisiae (strain ATCC 204508 / S288c) OX=559292 GN=YGR210C PE=1 SV=1
OG0013935	sp|Q8T498|GAP2_DROME Ras GTPase-activating protein raskol OS=Drosophila melanogaster OX=7227 GN=raskol PE=1 SV=3
OG0013937
OG0013940	sp|P25100|ADA1D_HUMAN Alpha-1D adrenergic receptor OS=Homo sapiens OX=9606 GN=ADRA1D PE=1 SV=2
OG0013941	sp|Q8N695|SC5A8_HUMAN Sodium-coupled monocarboxylate transporter 1 OS=Homo sapiens OX=9606 GN=SLC5A8 PE=1 SV=2
OG0013944
OG0013945	sp|Q6P3Z3|THAP4_MOUSE Peroxynitrite isomerase THAP4 OS=Mus musculus OX=10090 GN=Thap4 PE=1 SV=1
OG0013949	sp|Q9NDM2|GUTR1_DROME Protein trapped in endoderm-1 OS=Drosophila melanogaster OX=7227 GN=Tre1 PE=1 SV=1
OG0013954
OG0013958	sp|Q9UPV9|TRAK1_HUMAN Trafficking kinesin-binding protein 1 OS=Homo sapiens OX=9606 GN=TRAK1 PE=1 SV=1
OG0013959	sp|Q96C24|SYTL4_HUMAN Synaptotagmin-like protein 4 OS=Homo sapiens OX=9606 GN=SYTL4 PE=1 SV=2
OG0013960	sp|Q569T7|MFS4B_XENLA Sodium-dependent glucose transporter 1 OS=Xenopus laevis OX=8355 GN=mfsd4b PE=2 SV=1
OG0013969	sp|O15973|OPSD1_MIZYE Rhodopsin, GQ-coupled OS=Mizuhopecten yessoensis OX=6573 GN=SCOP1 PE=1 SV=1
OG0013970	sp|Q8I7P9|POL5_DROME Retrovirus-related Pol polyprotein from transposon opus OS=Drosophila melanogaster OX=7227 GN=pol PE=4 SV=1
OG0013972	sp|Q96EH5|RL39L_HUMAN 60S ribosomal protein L39-like OS=Homo sapiens OX=9606 GN=RPL39L PE=1 SV=3
OG0013973
OG0013981
OG0013982	sp|Q80YV4|PANK4_MOUSE 4'-phosphopantetheine phosphatase OS=Mus musculus OX=10090 GN=Pank4 PE=1 SV=2
OG0013985
OG0013991	sp|P42290|DRD5_XENLA D(1B) dopamine receptor OS=Xenopus laevis OX=8355 GN=drd5 PE=2 SV=1
OG0013992	sp|Q14571|ITPR2_HUMAN Inositol 1,4,5-trisphosphate receptor type 2 OS=Homo sapiens OX=9606 GN=ITPR2 PE=1 SV=2
OG0013997
OG0014000	sp|P70194|CLC4F_MOUSE C-type lectin domain family 4 member F OS=Mus musculus OX=10090 GN=Clec4f PE=1 SV=1
OG0014004	sp|Q16548|B2LA1_HUMAN Bcl-2-related protein A1 OS=Homo sapiens OX=9606 GN=BCL2A1 PE=1 SV=1
OG0014007
OG0014010	sp|Q9MYW9|OPRM_MACMU Mu-type opioid receptor OS=Macaca mulatta OX=9544 GN=OPRM1 PE=2 SV=2
OG0014012	sp|Q7SXF6|CREL2_DANRE Cysteine-rich with EGF-like domain protein 2 OS=Danio rerio OX=7955 GN=creld2 PE=2 SV=2
OG0014017	sp|Q90Y50|CXAR_DANRE Coxsackievirus and adenovirus receptor homolog OS=Danio rerio OX=7955 GN=cxadr PE=2 SV=1
OG0014019
OG0014024	sp|O35379|MRP1_MOUSE Multidrug resistance-associated protein 1 OS=Mus musculus OX=10090 GN=Abcc1 PE=1 SV=1
OG0014025	sp|Q9Y6K8|KAD5_HUMAN Adenylate kinase isoenzyme 5 OS=Homo sapiens OX=9606 GN=AK5 PE=1 SV=2
OG0014027
OG0014030	sp|C9D7C2|CAC1A_APIME Voltage-dependent calcium channel type A subunit alpha-1 OS=Apis mellifera OX=7460 GN=CAC PE=2 SV=1
OG0014037	sp|Q13002|GRIK2_HUMAN Glutamate receptor ionotropic, kainate 2 OS=Homo sapiens OX=9606 GN=GRIK2 PE=1 SV=1
OG0014038	sp|Q923Y9|TAAR1_RAT Trace amine-associated receptor 1 OS=Rattus norvegicus OX=10116 GN=Taar1 PE=2 SV=1
OG0014039
OG0014040
OG0014044
OG0014045	sp|Q25478|PER_MANSE Period circadian protein (Fragment) OS=Manduca sexta OX=7130 GN=per PE=2 SV=1
OG0014046	sp|Q00174|LAMA_DROME Laminin subunit alpha OS=Drosophila melanogaster OX=7227 GN=LanA PE=1 SV=2
OG0014047	sp|Q8TEU7|RPGF6_HUMAN Rap guanine nucleotide exchange factor 6 OS=Homo sapiens OX=9606 GN=RAPGEF6 PE=1 SV=2
OG0014048	sp|Q9Y6L6|SO1B1_HUMAN Solute carrier organic anion transporter family member 1B1 OS=Homo sapiens OX=9606 GN=SLCO1B1 PE=1 SV=2
OG0014051
OG0014052	sp|Q54BD4|STATC_DICDI Signal transducer and activator of transcription C OS=Dictyostelium discoideum OX=44689 GN=dstC PE=1 SV=1
OG0014058
OG0014059	sp|Q7Z407|CSMD3_HUMAN CUB and sushi domain-containing protein 3 OS=Homo sapiens OX=9606 GN=CSMD3 PE=2 SV=3
OG0014061	sp|Q99NI3|GT2D2_MOUSE General transcription factor II-I repeat domain-containing protein 2 OS=Mus musculus OX=10090 GN=Gtf2ird2 PE=2 SV=1
OG0014065	sp|Q9AV23|LSI3_ORYSJ Silicon efflux transporter LSI3 OS=Oryza sativa subsp. japonica OX=39947 GN=LSI3 PE=2 SV=1
OG0014068	sp|Q60417|SCRB1_CRIGR Scavenger receptor class B member 1 OS=Cricetulus griseus OX=10029 GN=SCARB1 PE=2 SV=1
OG0014070	sp|Q9ULY5|CLC4E_HUMAN C-type lectin domain family 4 member E OS=Homo sapiens OX=9606 GN=CLEC4E PE=1 SV=1
OG0014072
OG0014079	sp|Q4LDE5|SVEP1_HUMAN Sushi, von Willebrand factor type A, EGF and pentraxin domain-containing protein 1 OS=Homo sapiens OX=9606 GN=SVEP1 PE=1 SV=3
OG0014080
OG0014081
OG0014084	sp|Q80T41|GABR2_MOUSE Gamma-aminobutyric acid type B receptor subunit 2 OS=Mus musculus OX=10090 GN=Gabbr2 PE=1 SV=2
OG0014087	sp|P48733|UROM_BOVIN Uromodulin OS=Bos taurus OX=9913 GN=UMOD PE=2 SV=1
OG0014088	sp|Q8K243|TRI68_MOUSE E3 ubiquitin-protein ligase TRIM68 OS=Mus musculus OX=10090 GN=Trim68 PE=2 SV=1
OG0014090
OG0014092	sp|Q90WT7|BLCAP_CARAU Bladder cancer-associated protein OS=Carassius auratus OX=7957 GN=blcap PE=3 SV=1
OG0014093
OG0014096	sp|Q90476|LHX1_DANRE LIM/homeobox protein Lhx1 OS=Danio rerio OX=7955 GN=lhx1a PE=2 SV=1
OG0014097	sp|Q24119|TRH_DROME Protein trachealess OS=Drosophila melanogaster OX=7227 GN=trh PE=1 SV=4
OG0014101
OG0014102	sp|Q96EV2|RBM33_HUMAN RNA-binding protein 33 OS=Homo sapiens OX=9606 GN=RBM33 PE=1 SV=3
OG0014106	sp|Q9Y278|HS3S2_HUMAN Heparan sulfate glucosamine 3-O-sulfotransferase 2 OS=Homo sapiens OX=9606 GN=HS3ST2 PE=1 SV=1
OG0014109	sp|Q9C0G6|DYH6_HUMAN Dynein heavy chain 6, axonemal OS=Homo sapiens OX=9606 GN=DNAH6 PE=2 SV=3
OG0014112	sp|Q9W5U2|CHI10_DROME Probable chitinase 10 OS=Drosophila melanogaster OX=7227 GN=Cht10 PE=2 SV=2
OG0014113	sp|P17972|KCNAW_DROME Potassium voltage-gated channel protein Shaw OS=Drosophila melanogaster OX=7227 GN=Shaw PE=2 SV=1
OG0014119	sp|Q9UGR2|Z3H7B_HUMAN Zinc finger CCCH domain-containing protein 7B OS=Homo sapiens OX=9606 GN=ZC3H7B PE=1 SV=2
OG0014120	sp|P59807|CABC1_PROVU Chondroitin sulfate ABC endolyase OS=Proteus vulgaris OX=585 PE=1 SV=2
OG0014122
OG0014132	sp|Q6R2W3|SCND3_HUMAN SCAN domain-containing protein 3 OS=Homo sapiens OX=9606 GN=ZBED9 PE=2 SV=1
OG0014142	sp|P97454|SMAD5_MOUSE Mothers against decapentaplegic homolog 5 OS=Mus musculus OX=10090 GN=Smad5 PE=1 SV=2
OG0014145	sp|Q9Y2Y8|PRG3_HUMAN Proteoglycan 3 OS=Homo sapiens OX=9606 GN=PRG3 PE=1 SV=2
OG0014146	sp|Q7Z6K1|THAP5_HUMAN THAP domain-containing protein 5 OS=Homo sapiens OX=9606 GN=THAP5 PE=1 SV=2
OG0014149
OG0014151	sp|Q8K4Z4|ADRB2_CAVPO Beta-2 adrenergic receptor OS=Cavia porcellus OX=10141 GN=Adrb2 PE=3 SV=1
OG0014154	sp|P49415|SDC_DROME Syndecan OS=Drosophila melanogaster OX=7227 GN=Sdc PE=2 SV=2
OG0014167	sp|O95236|APOL3_HUMAN Apolipoprotein L3 OS=Homo sapiens OX=9606 GN=APOL3 PE=1 SV=3
OG0014168	sp|Q9NQG1|MANBL_HUMAN Protein MANBAL OS=Homo sapiens OX=9606 GN=MANBAL PE=1 SV=1
OG0014170	sp|Q7Z401|MYCPP_HUMAN C-myc promoter-binding protein OS=Homo sapiens OX=9606 GN=DENND4A PE=1 SV=2
OG0014204	sp|Q3ZBB1|SH21A_BOVIN SH2 domain-containing protein 1A OS=Bos taurus OX=9913 GN=SH2D1A PE=2 SV=1
OG0014220
OG0014222	sp|Q9Y624|JAM1_HUMAN Junctional adhesion molecule A OS=Homo sapiens OX=9606 GN=F11R PE=1 SV=1
OG0014229	sp|Q7T070|RHBG_DANRE Ammonium transporter Rh type B OS=Danio rerio OX=7955 GN=rhbg PE=2 SV=1
OG0014231	sp|Q24488|ROR1_DROME Tyrosine-protein kinase transmembrane receptor Ror OS=Drosophila melanogaster OX=7227 GN=Ror PE=1 SV=1
OG0014232	sp|P34609|JIP_CAEEL JNK-interacting protein OS=Caenorhabditis elegans OX=6239 GN=unc-16 PE=1 SV=4
OG0014266	sp|Q9LEX1|CLB_ARATH Calcium-dependent lipid-binding protein OS=Arabidopsis thaliana OX=3702 GN=CLB PE=1 SV=1
OG0014281	sp|P04323|POL3_DROME Retrovirus-related Pol polyprotein from transposon 17.6 OS=Drosophila melanogaster OX=7227 GN=pol PE=4 SV=1
OG0014291
OG0014299	sp|Q5GIT4|VGFR2_DANRE Vascular endothelial growth factor receptor 2 OS=Danio rerio OX=7955 GN=kdr PE=1 SV=2
OG0014311
OG0014313	sp|Q8VCS3|XYLK_MOUSE Glycosaminoglycan xylosylkinase OS=Mus musculus OX=10090 GN=Fam20b PE=1 SV=1
OG0014326
OG0014340
OG0014347
OG0014352	sp|P13608|PGCA_BOVIN Aggrecan core protein OS=Bos taurus OX=9913 GN=ACAN PE=1 SV=3
OG0014362
OG0014364	sp|Q9NZ08|ERAP1_HUMAN Endoplasmic reticulum aminopeptidase 1 OS=Homo sapiens OX=9606 GN=ERAP1 PE=1 SV=3
OG0014371	sp|Q9Z2E3|ERN2_MOUSE Serine/threonine-protein kinase/endoribonuclease IRE2 OS=Mus musculus OX=10090 GN=Ern2 PE=2 SV=2
OG0014647
OG0014652	sp|Q29P71|MYO7A_DROPS Myosin-VIIa OS=Drosophila pseudoobscura pseudoobscura OX=46245 GN=ck PE=3 SV=1
OG0014658	sp|Q04861|NFKB1_CHICK Nuclear factor NF-kappa-B p105 subunit OS=Gallus gallus OX=9031 GN=NFKB1 PE=2 SV=2
OG0014660	sp|Q9FKP5|UBP17_ARATH Ubiquitin carboxyl-terminal hydrolase 17 OS=Arabidopsis thaliana OX=3702 GN=UBP17 PE=2 SV=1
OG0014667	sp|A1L3M3|YLAT2_XENLA Y+L amino acid transporter 2 OS=Xenopus laevis OX=8355 GN=slc7a6 PE=2 SV=1
OG0014683	sp|Q9BZC7|ABCA2_HUMAN ATP-binding cassette sub-family A member 2 OS=Homo sapiens OX=9606 GN=ABCA2 PE=1 SV=4
OG0014684	sp|Q9QXW9|LAT2_MOUSE Large neutral amino acids transporter small subunit 2 OS=Mus musculus OX=10090 GN=Slc7a8 PE=1 SV=1
OG0014687	sp|Q91ZZ5|RXFP2_MOUSE Relaxin receptor 2 OS=Mus musculus OX=10090 GN=Rxfp2 PE=2 SV=2
OG0014689	sp|O77708|KCC2D_RABIT Calcium/calmodulin-dependent protein kinase type II subunit delta OS=Oryctolagus cuniculus OX=9986 GN=CAMK2D PE=2 SV=2
OG0014691
OG0014699	sp|Q9BEG5|EDA_BOVIN Ectodysplasin-A OS=Bos taurus OX=9913 GN=EDA PE=3 SV=2
OG0014701	sp|Q2EY13|PRTGB_DANRE Protogenin B (Fragment) OS=Danio rerio OX=7955 GN=prtgb PE=2 SV=1
OG0014704	sp|Q9P2V4|LRIT1_HUMAN Leucine-rich repeat, immunoglobulin-like domain and transmembrane domain-containing protein 1 OS=Homo sapiens OX=9606 GN=LRIT1 PE=2 SV=1
OG0014713
OG0014716	sp|Q6YCH2|TDPZ4_MOUSE TD and POZ domain-containing protein 4 OS=Mus musculus OX=10090 GN=Tdpoz4 PE=2 SV=2
OG0014719	sp|P15541|AMPN_RABIT Aminopeptidase N OS=Oryctolagus cuniculus OX=9986 GN=ANPEP PE=1 SV=4
OG0014732	sp|Q13936|CAC1C_HUMAN Voltage-dependent L-type calcium channel subunit alpha-1C OS=Homo sapiens OX=9606 GN=CACNA1C PE=1 SV=4
OG0014735	sp|Q9CQP3|CHCH5_MOUSE Coiled-coil-helix-coiled-coil-helix domain-containing protein 5 OS=Mus musculus OX=10090 GN=Chchd5 PE=1 SV=1
OG0014744	sp|Q96LI6|HSFY1_HUMAN Heat shock transcription factor, Y-linked OS=Homo sapiens OX=9606 GN=HSFY1 PE=1 SV=1
OG0014745	sp|P09849|LPH_RABIT Lactase-phlorizin hydrolase OS=Oryctolagus cuniculus OX=9986 GN=LCT PE=1 SV=1
OG0014754	sp|Q9WU19|HAOX1_MOUSE Hydroxyacid oxidase 1 OS=Mus musculus OX=10090 GN=Hao1 PE=1 SV=1
OG0014762	sp|Q9V5N8|STAN_DROME Protocadherin-like wing polarity protein stan OS=Drosophila melanogaster OX=7227 GN=stan PE=1 SV=4
OG0014767	sp|Q8VI95|OAS1D_MOUSE Inactive 2'-5'-oligoadenylate synthase 1D OS=Mus musculus OX=10090 GN=Oas1d PE=1 SV=1
OG0014769
OG0014770	sp|Q9D668|ARRD2_MOUSE Arrestin domain-containing protein 2 OS=Mus musculus OX=10090 GN=Arrdc2 PE=2 SV=1
OG0014771	sp|Q9CZD5|IF3M_MOUSE Translation initiation factor IF-3, mitochondrial OS=Mus musculus OX=10090 GN=Mtif3 PE=1 SV=1
OG0014776
OG0014778	sp|P98159|NUDEL_DROME Serine protease nudel OS=Drosophila melanogaster OX=7227 GN=ndl PE=1 SV=2
OG0014794	sp|Q6P8K8|CBPA4_MOUSE Carboxypeptidase A4 OS=Mus musculus OX=10090 GN=Cpa4 PE=2 SV=2
OG0014795	sp|V5NAL9|TLR4_PINIB Toll-like receptor 4 OS=Pinctada imbricata OX=66713 PE=2 SV=1
OG0014801	sp|P51587|BRCA2_HUMAN Breast cancer type 2 susceptibility protein OS=Homo sapiens OX=9606 GN=BRCA2 PE=1 SV=3
OG0014806	sp|Q07537|GALT1_BOVIN Polypeptide N-acetylgalactosaminyltransferase 1 OS=Bos taurus OX=9913 GN=GALNT1 PE=1 SV=1
OG0014809	sp|Q9LHP4|RCH2_ARATH Receptor-like protein kinase 2 OS=Arabidopsis thaliana OX=3702 GN=RCH2 PE=1 SV=1
OG0014812
OG0014814
OG0014816	sp|Q5F4B8|S46A3_CHICK Solute carrier family 46 member 3 OS=Gallus gallus OX=9031 GN=SLC46A3 PE=2 SV=1
OG0014817
OG0014819	sp|Q9BVS5|TR61B_HUMAN tRNA (adenine(58)-N(1))-methyltransferase, mitochondrial OS=Homo sapiens OX=9606 GN=TRMT61B PE=1 SV=2
OG0014822
OG0014826	sp|Q8BZT9|LACC1_MOUSE Purine nucleoside phosphorylase LACC1 OS=Mus musculus OX=10090 GN=Lacc1 PE=1 SV=1
OG0014833	sp|Q9Y6X6|MYO16_HUMAN Unconventional myosin-XVI OS=Homo sapiens OX=9606 GN=MYO16 PE=1 SV=3
OG0014835
OG0014837	sp|P35500|SCNA_DROME Sodium channel protein para OS=Drosophila melanogaster OX=7227 GN=para PE=2 SV=3
OG0014841	sp|Q1LZA1|CAH1_BOVIN Carbonic anhydrase 1 OS=Bos taurus OX=9913 GN=CA1 PE=2 SV=3
OG0014843	sp|Q5RKI3|DPOLL_RAT DNA polymerase lambda OS=Rattus norvegicus OX=10116 GN=Poll PE=2 SV=1
OG0014844	sp|Q7VL52|MSBA_HAEDU Lipid A export ATP-binding/permease protein MsbA OS=Haemophilus ducreyi (strain 35000HP / ATCC 700724) OX=233412 GN=msbA PE=3 SV=1
OG0014846	sp|Q61625|GRID2_MOUSE Glutamate receptor ionotropic, delta-2 OS=Mus musculus OX=10090 GN=Grid2 PE=1 SV=1
OG0014854	sp|O28987|Y1281_ARCFU Uncharacterized protein AF_1281 OS=Archaeoglobus fulgidus (strain ATCC 49558 / VC-16 / DSM 4304 / JCM 9628 / NBRC 100126) OX=224325 GN=AF_1281 PE=3 SV=1
OG0014856	sp|Q04861|NFKB1_CHICK Nuclear factor NF-kappa-B p105 subunit OS=Gallus gallus OX=9031 GN=NFKB1 PE=2 SV=2
OG0014870	sp|F1NTD6|ASCC3_CHICK Activating signal cointegrator 1 complex subunit 3 OS=Gallus gallus OX=9031 GN=ascc3 PE=3 SV=2
OG0014874	sp|Q9Y5P8|P2R3B_HUMAN Serine/threonine-protein phosphatase 2A regulatory subunit B'' subunit beta OS=Homo sapiens OX=9606 GN=PPP2R3B PE=1 SV=2
OG0014879	sp|Q6RFZ7|PKHG5_RAT Pleckstrin homology domain-containing family G member 5 OS=Rattus norvegicus OX=10116 GN=Plekhg5 PE=1 SV=1
OG0014884	sp|P0C8G3|UBC_ASFK5 Ubiquitin-conjugating enzyme E2 OS=African swine fever virus (isolate Pig/Kenya/KEN-50/1950) OX=561445 GN=UBC PE=3 SV=1
OG0014894	sp|Q9C0G6|DYH6_HUMAN Dynein heavy chain 6, axonemal OS=Homo sapiens OX=9606 GN=DNAH6 PE=2 SV=3
OG0014911
OG0014915	sp|A7MBH5|CC151_BOVIN Coiled-coil domain-containing protein 151 OS=Bos taurus OX=9913 GN=CCDC151 PE=2 SV=1
OG0014917
OG0014922
OG0014929	sp|O95210|STBD1_HUMAN Starch-binding domain-containing protein 1 OS=Homo sapiens OX=9606 GN=STBD1 PE=1 SV=1
OG0014930	sp|Q9GL24|CATL1_CANLF Cathepsin L1 OS=Canis lupus familiaris OX=9615 GN=CTSL PE=2 SV=1
OG0014932	sp|Q07E43|ASZ1_DASNO Ankyrin repeat, SAM and basic leucine zipper domain-containing protein 1 OS=Dasypus novemcinctus OX=9361 GN=ASZ1 PE=3 SV=1
OG0014938
OG0014943
OG0014944
OG0014945	sp|Q8N5U0|CK042_HUMAN Uncharacterized protein C11orf42 OS=Homo sapiens OX=9606 GN=C11orf42 PE=2 SV=2
OG0014946
OG0014948	sp|Q9Y289|SC5A6_HUMAN Sodium-dependent multivitamin transporter OS=Homo sapiens OX=9606 GN=SLC5A6 PE=2 SV=2
OG0014951
OG0014953
OG0014954	sp|P18075|BMP7_HUMAN Bone morphogenetic protein 7 OS=Homo sapiens OX=9606 GN=BMP7 PE=1 SV=1
OG0014955	sp|Q95LI3|ZFY_BOVIN Zinc finger Y-chromosomal protein OS=Bos taurus OX=9913 GN=ZFY PE=2 SV=1
OG0014956
OG0014957	sp|Q8IWW6|RHG12_HUMAN Rho GTPase-activating protein 12 OS=Homo sapiens OX=9606 GN=ARHGAP12 PE=1 SV=1
OG0014958	sp|P28827|PTPRM_HUMAN Receptor-type tyrosine-protein phosphatase mu OS=Homo sapiens OX=9606 GN=PTPRM PE=1 SV=2
OG0014962	sp|Q9ER74|SALL1_MOUSE Sal-like protein 1 OS=Mus musculus OX=10090 GN=Sall1 PE=1 SV=1
OG0014965	sp|Q9Y5H1|PCDG2_HUMAN Protocadherin gamma-A2 OS=Homo sapiens OX=9606 GN=PCDHGA2 PE=2 SV=1
OG0014970	sp|Q5EA48|TM268_BOVIN Transmembrane protein 268 OS=Bos taurus OX=9913 GN=TMEM268 PE=2 SV=1
OG0014971	sp|P42575|CASP2_HUMAN Caspase-2 OS=Homo sapiens OX=9606 GN=CASP2 PE=1 SV=2
OG0014976
OG0014984
OG0014991	sp|Q8BKG3|PTK7_MOUSE Inactive tyrosine-protein kinase 7 OS=Mus musculus OX=10090 GN=Ptk7 PE=1 SV=1
OG0014992	sp|Q7RTY1|MOT9_HUMAN Monocarboxylate transporter 9 OS=Homo sapiens OX=9606 GN=SLC16A9 PE=1 SV=1
OG0014997	sp|Q53RD9|FBLN7_HUMAN Fibulin-7 OS=Homo sapiens OX=9606 GN=FBLN7 PE=2 SV=1
OG0014999
OG0015000	sp|Q6DCX5|PCFT_XENLA Proton-coupled folate transporter OS=Xenopus laevis OX=8355 GN=slc46a1 PE=2 SV=1
OG0015012	sp|P30543|AA2AR_RAT Adenosine receptor A2a OS=Rattus norvegicus OX=10116 GN=Adora2a PE=1 SV=2
OG0015015
OG0015016
OG0015017	sp|Q9JIS1|RIMS2_RAT Regulating synaptic membrane exocytosis protein 2 OS=Rattus norvegicus OX=10116 GN=Rims2 PE=1 SV=1
OG0015019	sp|Q04637|IF4G1_HUMAN Eukaryotic translation initiation factor 4 gamma 1 OS=Homo sapiens OX=9606 GN=EIF4G1 PE=1 SV=4
OG0015021
OG0015023	sp|Q9U6A1|PROS_DROVI Homeobox protein prospero OS=Drosophila virilis OX=7244 GN=pros PE=3 SV=1
OG0015024
OG0015026
OG0015032	sp|P34457|YMD3_CAEEL Putative uncharacterized transposon-derived protein F54H12.3 OS=Caenorhabditis elegans OX=6239 GN=F54H12.3 PE=5 SV=1
OG0015036	sp|Q5UQV3|YL371_MIMIV Putative ankyrin repeat protein L371 OS=Acanthamoeba polyphaga mimivirus OX=212035 GN=MIMI_L371 PE=4 SV=1
OG0015039	sp|P36107|AUR1_YEAST Inositol phosphorylceramide synthase catalytic subunit AUR1 OS=Saccharomyces cerevisiae (strain ATCC 204508 / S288c) OX=559292 GN=AUR1 PE=1 SV=1
OG0015041	sp|Q9TTC1|POL_KORV Gag-Pol polyprotein OS=Koala retrovirus OX=394239 GN=pro-pol PE=3 SV=2
OG0015046	sp|Q9L9D7|COCE_RHOSM Cocaine esterase OS=Rhodococcus sp. (strain MB1 Bresler) OX=104109 GN=cocE PE=1 SV=1
OG0015048
OG0015053	sp|Q6IR42|ZCPW1_MOUSE Zinc finger CW-type PWWP domain protein 1 OS=Mus musculus OX=10090 GN=Zcwpw1 PE=1 SV=2
OG0015056	sp|Q9U518|ASPG_DIRIM L-asparaginase OS=Dirofilaria immitis OX=6287 PE=1 SV=1
OG0015058
OG0015063	sp|Q9Z100|CPXM1_MOUSE Probable carboxypeptidase X1 OS=Mus musculus OX=10090 GN=Cpxm1 PE=2 SV=2
OG0015065	sp|Q8BZW2|SWAHB_MOUSE Ankyrin repeat domain-containing protein SOWAHB OS=Mus musculus OX=10090 GN=Sowahb PE=1 SV=1
OG0015066	sp|Q9QYS2|GRM3_MOUSE Metabotropic glutamate receptor 3 OS=Mus musculus OX=10090 GN=Grm3 PE=1 SV=1
OG0015068
OG0015079
OG0015081	sp|Q9V5P6|NOP10_DROME H/ACA ribonucleoprotein complex subunit 3 OS=Drosophila melanogaster OX=7227 GN=CG7637 PE=2 SV=1
OG0015082	sp|B0UYF2|S7A14_DANRE Probable cationic amino acid transporter OS=Danio rerio OX=7955 GN=slc7a14a PE=3 SV=1
OG0015086
OG0015087
OG0015089
OG0015090	sp|P20825|POL2_DROME Retrovirus-related Pol polyprotein from transposon 297 OS=Drosophila melanogaster OX=7227 GN=pol PE=4 SV=1
OG0015096	sp|Q35101|COX1_METSE Cytochrome c oxidase subunit 1 OS=Metridium senile OX=6116 GN=COI PE=3 SV=1
OG0015097	sp|Q95135|EAA3_BOVIN Excitatory amino acid transporter 3 OS=Bos taurus OX=9913 GN=SLC1A1 PE=2 SV=1
OG0015098
OG0015099
OG0015100	sp|O34355|YTCJ_BACSU Putative amidohydrolase YtcJ OS=Bacillus subtilis (strain 168) OX=224308 GN=ytcJ PE=3 SV=1
OG0015107	sp|Q84SL0|CDPKK_ORYSJ Calcium-dependent protein kinase 20 OS=Oryza sativa subsp. japonica OX=39947 GN=CPK20 PE=2 SV=2
OG0015114	sp|P23711|HMOX2_RAT Heme oxygenase 2 OS=Rattus norvegicus OX=10116 GN=Hmox2 PE=1 SV=1
OG0015115	sp|Q149M9|NWD1_HUMAN NACHT domain- and WD repeat-containing protein 1 OS=Homo sapiens OX=9606 GN=NWD1 PE=1 SV=3
OG0015116
OG0015117	sp|Q9EPW9|TLR6_MOUSE Toll-like receptor 6 OS=Mus musculus OX=10090 GN=Tlr6 PE=1 SV=2
OG0015122
OG0015126	sp|Q9TU53|CUBN_CANLF Cubilin OS=Canis lupus familiaris OX=9615 GN=CUBN PE=1 SV=1
OG0015127	sp|A2AMZ4|NDUF8_MOUSE NADH dehydrogenase [ubiquinone] 1 alpha subcomplex assembly factor 8 OS=Mus musculus OX=10090 GN=Ndufaf8 PE=1 SV=1
OG0015132	sp|P10978|POLX_TOBAC Retrovirus-related Pol polyprotein from transposon TNT 1-94 OS=Nicotiana tabacum OX=4097 PE=2 SV=1
OG0015139
OG0015142	sp|Q4VA61|DSCL1_MOUSE Down syndrome cell adhesion molecule-like protein 1 homolog OS=Mus musculus OX=10090 GN=Dscaml1 PE=1 SV=2
OG0015149
OG0015152	sp|P13277|CYSP1_HOMAM Digestive cysteine proteinase 1 OS=Homarus americanus OX=6706 GN=LCP1 PE=1 SV=2
OG0015157
OG0015167	sp|P10978|POLX_TOBAC Retrovirus-related Pol polyprotein from transposon TNT 1-94 OS=Nicotiana tabacum OX=4097 PE=2 SV=1
OG0015168	sp|P70057|KCNQ1_XENLA Potassium voltage-gated channel subfamily KQT member 1 OS=Xenopus laevis OX=8355 GN=kcnq1 PE=1 SV=2
OG0015173
OG0015176	sp|Q9QZ15|CLC4A_MOUSE C-type lectin domain family 4 member A OS=Mus musculus OX=10090 GN=Clec4a PE=1 SV=1
OG0015177	sp|Q32NC0|CR021_HUMAN UPF0711 protein C18orf21 OS=Homo sapiens OX=9606 GN=C18orf21 PE=1 SV=1
OG0015197
OG0015198	sp|Q8CG65|SSPO_MOUSE SCO-spondin OS=Mus musculus OX=10090 GN=Sspo PE=2 SV=2
OG0015210	sp|O70401|TSN6_MOUSE Tetraspanin-6 OS=Mus musculus OX=10090 GN=Tspan6 PE=1 SV=1
OG0015213	sp|O18965|KCNH1_BOVIN Potassium voltage-gated channel subfamily H member 1 OS=Bos taurus OX=9913 GN=KCNH1 PE=2 SV=2
OG0015215	sp|Q8BZQ2|CRLD2_MOUSE Cysteine-rich secretory protein LCCL domain-containing 2 OS=Mus musculus OX=10090 GN=Crispld2 PE=1 SV=1
OG0015219	sp|O00909|ARF1_DICDI ADP-ribosylation factor 1 OS=Dictyostelium discoideum OX=44689 GN=arfA PE=1 SV=3
OG0015227	sp|Q9D132|UPK1A_MOUSE Uroplakin-1a OS=Mus musculus OX=10090 GN=Upk1a PE=1 SV=1
OG0015235	sp|Q9YIB7|ZIC2B_XENLA Zinc finger protein ZIC 2-B OS=Xenopus laevis OX=8355 GN=zic2-b PE=2 SV=1
OG0015240
OG0015256	sp|Q8IWR0|Z3H7A_HUMAN Zinc finger CCCH domain-containing protein 7A OS=Homo sapiens OX=9606 GN=ZC3H7A PE=1 SV=1
OG0015257	sp|P0DP91|ERPG3_HUMAN Chimeric ERCC6-PGBD3 protein OS=Homo sapiens OX=9606 GN=ERCC6 PE=1 SV=1
OG0015258	sp|Q9UBF9|MYOTI_HUMAN Myotilin OS=Homo sapiens OX=9606 GN=MYOT PE=1 SV=2
OG0015261
OG0015264	sp|Q8K1T0|TMPS3_MOUSE Transmembrane protease serine 3 OS=Mus musculus OX=10090 GN=Tmprss3 PE=1 SV=2
OG0015279	sp|Q99JW5|EPCAM_MOUSE Epithelial cell adhesion molecule OS=Mus musculus OX=10090 GN=Epcam PE=1 SV=1
OG0015344	sp|Q8GY23|UPL1_ARATH E3 ubiquitin-protein ligase UPL1 OS=Arabidopsis thaliana OX=3702 GN=UPL1 PE=1 SV=3
OG0015346
OG0015388
OG0015391
OG0015392
OG0015398	sp|Q5I4F9|AQP4_NOTAL Aquaporin-4 OS=Notomys alexis OX=184396 GN=AQP4 PE=2 SV=1
OG0015418	sp|P41233|ABCA1_MOUSE Phospholipid-transporting ATPase ABCA1 OS=Mus musculus OX=10090 GN=Abca1 PE=1 SV=4
OG0015423
OG0015429
OG0015433	sp|A5WFR0|PIF1_PSYWF ATP-dependent DNA helicase pif1 OS=Psychrobacter sp. (strain PRwf-1) OX=349106 GN=pif1 PE=3 SV=1
OG0015441
OG0015455	sp|Q8NFZ4|NLGN2_HUMAN Neuroligin-2 OS=Homo sapiens OX=9606 GN=NLGN2 PE=1 SV=1
OG0015471	sp|Q3L254|WNT7B_CHICK Protein Wnt-7b OS=Gallus gallus OX=9031 GN=WNT7B PE=2 SV=1
OG0015475	sp|Q3KNS1|PTHD3_HUMAN Patched domain-containing protein 3 OS=Homo sapiens OX=9606 GN=PTCHD3 PE=1 SV=3
OG0015486	sp|Q32PF2|ACLY_BOVIN ATP-citrate synthase OS=Bos taurus OX=9913 GN=ACLY PE=2 SV=1
OG0015490
OG0015491
OG0015492	sp|P22717|GCYB2_RAT Guanylate cyclase soluble subunit beta-2 OS=Rattus norvegicus OX=10116 GN=Gucy1b2 PE=2 SV=1
OG0015494	sp|Q9NH13|RP43_RIFPA Exoskeleton protein RP43 OS=Riftia pachyptila OX=6426 PE=1 SV=1
OG0015905	sp|B1H134|FLRT3_XENTR Leucine-rich repeat transmembrane protein FLRT3 OS=Xenopus tropicalis OX=8364 GN=flrt3 PE=2 SV=1
OG0015909	sp|Q6NYM1|KLH21_DANRE Kelch-like protein 21 OS=Danio rerio OX=7955 GN=klhl21 PE=2 SV=1
OG0015914
OG0015918
OG0015919	sp|Q86WI3|NLRC5_HUMAN Protein NLRC5 OS=Homo sapiens OX=9606 GN=NLRC5 PE=1 SV=3
OG0015932	sp|Q9ULX5|RN112_HUMAN RING finger protein 112 OS=Homo sapiens OX=9606 GN=RNF112 PE=1 SV=2
OG0015960
OG0015967
OG0015968
OG0015982
OG0015989	sp|Q96NJ5|KLH32_HUMAN Kelch-like protein 32 OS=Homo sapiens OX=9606 GN=KLHL32 PE=2 SV=2
OG0015993	sp|Q6ZIU9|CDPKL_ORYSJ Calcium-dependent protein kinase 21 OS=Oryza sativa subsp. japonica OX=39947 GN=CPK21 PE=2 SV=1
OG0015994	sp|Q9NYK1|TLR7_HUMAN Toll-like receptor 7 OS=Homo sapiens OX=9606 GN=TLR7 PE=1 SV=1
OG0015999	sp|P35440|TSP2_CHICK Thrombospondin-2 OS=Gallus gallus OX=9031 GN=THBS2 PE=2 SV=1
OG0016000	sp|Q9XIP2|OTU6_ARATH OVARIAN TUMOR DOMAIN-containing deubiquitinating enzyme 6 OS=Arabidopsis thaliana OX=3702 GN=OTU6 PE=1 SV=2
OG0016002	sp|Q16513|PKN2_HUMAN Serine/threonine-protein kinase N2 OS=Homo sapiens OX=9606 GN=PKN2 PE=1 SV=1
OG0016004
OG0016007	sp|Q75ZP8|P2OX_LYOSH Pyranose 2-oxidase OS=Lyophyllum shimeji OX=47721 GN=p2ox PE=2 SV=1
OG0016011	sp|Q9VE46|SC5A7_DROME High-affinity choline transporter 1 OS=Drosophila melanogaster OX=7227 GN=ChT PE=2 SV=2
OG0016012
OG0016026
OG0016031	sp|L0R819|ASURF_HUMAN ASNSD1 upstream open reading frame protein OS=Homo sapiens OX=9606 GN=ASDURF PE=1 SV=1
OG0016032	sp|Q9JJ09|NPT2B_RAT Sodium-dependent phosphate transport protein 2B OS=Rattus norvegicus OX=10116 GN=Slc34a2 PE=1 SV=1
OG0016038	sp|Q60755|CALCR_MOUSE Calcitonin receptor OS=Mus musculus OX=10090 GN=Calcr PE=2 SV=2
OG0016054	sp|Q7LFX5|CHSTF_HUMAN Carbohydrate sulfotransferase 15 OS=Homo sapiens OX=9606 GN=CHST15 PE=1 SV=1
OG0016063
OG0016064	sp|Q9R1Z8|VINEX_MOUSE Vinexin OS=Mus musculus OX=10090 GN=Sorbs3 PE=1 SV=1
OG0016066	sp|P51647|AL1A1_RAT Retinal dehydrogenase 1 OS=Rattus norvegicus OX=10116 GN=Aldh1a1 PE=1 SV=3
OG0016067	sp|G5EBQ8|CHS2_CAEEL Chitin synthase chs-2 OS=Caenorhabditis elegans OX=6239 GN=chs-2 PE=1 SV=1
OG0016070	sp|Q8WWZ3|EDAD_HUMAN Ectodysplasin-A receptor-associated adapter protein OS=Homo sapiens OX=9606 GN=EDARADD PE=1 SV=3
OG0016072	sp|Q28181|CNGB1_BOVIN Cyclic nucleotide-gated cation channel beta-1 OS=Bos taurus OX=9913 GN=CNGB1 PE=1 SV=1
OG0016079	sp|Q9HCU4|CELR2_HUMAN Cadherin EGF LAG seven-pass G-type receptor 2 OS=Homo sapiens OX=9606 GN=CELSR2 PE=1 SV=1
OG0016082
OG0016093
OG0016100
OG0016108
OG0016109
OG0016119	sp|O15943|CADN_DROME Neural-cadherin OS=Drosophila melanogaster OX=7227 GN=CadN PE=1 SV=2
OG0016131	sp|Q9N5Y2|TECR_CAEEL Probable very-long-chain enoyl-CoA reductase art-1 OS=Caenorhabditis elegans OX=6239 GN=art-1 PE=3 SV=1
OG0016139
OG0016143	sp|Q9QXE2|DPOLL_MOUSE DNA polymerase lambda OS=Mus musculus OX=10090 GN=Poll PE=2 SV=1
OG0016145	sp|Q9H6A9|PCX3_HUMAN Pecanex-like protein 3 OS=Homo sapiens OX=9606 GN=PCNX3 PE=1 SV=2
OG0016149
OG0016150	sp|D3YXG0|HMCN1_MOUSE Hemicentin-1 OS=Mus musculus OX=10090 GN=Hmcn1 PE=1 SV=1
OG0016151	sp|Q6GLU8|PHAR1_XENLA Phosphatase and actin regulator 1 OS=Xenopus laevis OX=8355 GN=phactr1 PE=2 SV=1
OG0016159
OG0016162	sp|Q9WWW2|ALKJ_PSEPU Alcohol dehydrogenase [acceptor] OS=Pseudomonas putida OX=303 GN=alkJ PE=3 SV=1
OG0016172	sp|Q8N2E2|VWDE_HUMAN von Willebrand factor D and EGF domain-containing protein OS=Homo sapiens OX=9606 GN=VWDE PE=2 SV=4
OG0016183
OG0016185	sp|Q40302|CALM_MACPY Calmodulin OS=Macrocystis pyrifera OX=35122 PE=2 SV=3
OG0016190
OG0016203	sp|Q8VEG6|CNO6L_MOUSE CCR4-NOT transcription complex subunit 6-like OS=Mus musculus OX=10090 GN=Cnot6l PE=1 SV=2
OG0016217
OG0016222	sp|Q98943|CASP2_CHICK Caspase-2 OS=Gallus gallus OX=9031 GN=CASP2 PE=2 SV=2
OG0016224	sp|Q9JLB5|ACH10_RAT Neuronal acetylcholine receptor subunit alpha-10 OS=Rattus norvegicus OX=10116 GN=Chrna10 PE=1 SV=1
OG0016229	sp|P22770|ACHA7_CHICK Neuronal acetylcholine receptor subunit alpha-7 OS=Gallus gallus OX=9031 GN=CHRNA7 PE=1 SV=1
OG0016237	sp|Q5TZA2|CROCC_HUMAN Rootletin OS=Homo sapiens OX=9606 GN=CROCC PE=1 SV=1
OG0016238
OG0016242	sp|P30683|GNAO_LYMST Guanine nucleotide-binding protein G(o) subunit alpha OS=Lymnaea stagnalis OX=6523 PE=2 SV=3
OG0016247
OG0016259	sp|Q3UGF1|WDR19_MOUSE WD repeat-containing protein 19 OS=Mus musculus OX=10090 GN=Wdr19 PE=1 SV=1
OG0016265	sp|Q9H1H9|KI13A_HUMAN Kinesin-like protein KIF13A OS=Homo sapiens OX=9606 GN=KIF13A PE=1 SV=2
OG0016275
OG0016279	sp|Q9Y345|SC6A5_HUMAN Sodium- and chloride-dependent glycine transporter 2 OS=Homo sapiens OX=9606 GN=SLC6A5 PE=1 SV=3
OG0016284
OG0016289	sp|P49892|AA1R_CHICK Adenosine receptor A1 OS=Gallus gallus OX=9031 GN=ADORA1 PE=2 SV=1
OG0016291
OG0016298	sp|Q96KR1|ZFR_HUMAN Zinc finger RNA-binding protein OS=Homo sapiens OX=9606 GN=ZFR PE=1 SV=2
OG0016305	sp|Q3U0P1|PALB2_MOUSE Partner and localizer of BRCA2 OS=Mus musculus OX=10090 GN=Palb2 PE=1 SV=2
OG0016307	sp|Q6DRG7|MYPT1_DANRE Protein phosphatase 1 regulatory subunit 12A OS=Danio rerio OX=7955 GN=ppp1r12a PE=2 SV=2
OG0016311	sp|Q6E2N3|TRI33_DANRE E3 ubiquitin-protein ligase TRIM33 OS=Danio rerio OX=7955 GN=trim33 PE=2 SV=1
OG0016319	sp|Q8WZ42|TITIN_HUMAN Titin OS=Homo sapiens OX=9606 GN=TTN PE=1 SV=4
OG0016327
OG0016331	sp|Q60592|MAST2_MOUSE Microtubule-associated serine/threonine-protein kinase 2 OS=Mus musculus OX=10090 GN=Mast2 PE=1 SV=1
OG0016334
OG0016336
OG0016338	sp|P39825|PROF_SCHPO Profilin OS=Schizosaccharomyces pombe (strain 972 / ATCC 24843) OX=284812 GN=cdc3 PE=1 SV=1
OG0016344	sp|Q9H0W7|THAP2_HUMAN THAP domain-containing protein 2 OS=Homo sapiens OX=9606 GN=THAP2 PE=1 SV=1
OG0016356	sp|A3KG59|P20D2_MOUSE Peptidase M20 domain-containing protein 2 OS=Mus musculus OX=10090 GN=Pm20d2 PE=1 SV=1
OG0016357	sp|Q02325|PLGB_HUMAN Plasminogen-like protein B OS=Homo sapiens OX=9606 GN=PLGLB1 PE=3 SV=1
OG0016359	sp|Q9NZ56|FMN2_HUMAN Formin-2 OS=Homo sapiens OX=9606 GN=FMN2 PE=1 SV=4
OG0016360
OG0016361	sp|Q8TBB0|THAP6_HUMAN THAP domain-containing protein 6 OS=Homo sapiens OX=9606 GN=THAP6 PE=1 SV=1
OG0016364	sp|P43143|ACHA6_RAT Neuronal acetylcholine receptor subunit alpha-6 OS=Rattus norvegicus OX=10116 GN=Chrna6 PE=2 SV=1
OG0016366	sp|Q7Q161|GLYR1_ANOGA Putative oxidoreductase GLYR1 homolog OS=Anopheles gambiae OX=7165 GN=AGAP009949 PE=3 SV=5
OG0016368	sp|O88196|TTC3_MOUSE E3 ubiquitin-protein ligase TTC3 OS=Mus musculus OX=10090 GN=Ttc3 PE=1 SV=2
OG0016371
OG0016376	sp|Q9NZJ4|SACS_HUMAN Sacsin OS=Homo sapiens OX=9606 GN=SACS PE=1 SV=2
OG0016377	sp|B2DCR8|CTX_SEPES SE-cephalotoxin OS=Sepia esculenta OX=31210 PE=1 SV=1
OG0016378
OG0016380
OG0016383
OG0016385
OG0016389
OG0016394	sp|O43422|P52K_HUMAN 52 kDa repressor of the inhibitor of the protein kinase OS=Homo sapiens OX=9606 GN=THAP12 PE=1 SV=2
OG0016400	sp|P43679|ACHB3_CHICK Neuronal acetylcholine receptor subunit beta-3 OS=Gallus gallus OX=9031 GN=CHRNB3 PE=2 SV=2
OG0016403
OG0016406	sp|Q09225|NRF6_CAEEL Nose resistant to fluoxetine protein 6 OS=Caenorhabditis elegans OX=6239 GN=nrf-6 PE=1 SV=3
OG0016418	sp|Q8BLD6|ANR55_MOUSE Ankyrin repeat domain-containing protein 55 OS=Mus musculus OX=10090 GN=Ankrd55 PE=1 SV=2
OG0016419
OG0016424	sp|Q7RTY0|MOT13_HUMAN Monocarboxylate transporter 13 OS=Homo sapiens OX=9606 GN=SLC16A13 PE=1 SV=1
OG0016426	sp|Q8WZ42|TITIN_HUMAN Titin OS=Homo sapiens OX=9606 GN=TTN PE=1 SV=4
OG0016429
OG0016437
OG0016439	sp|Q86UL8|MAGI2_HUMAN Membrane-associated guanylate kinase, WW and PDZ domain-containing protein 2 OS=Homo sapiens OX=9606 GN=MAGI2 PE=1 SV=3
OG0016443
OG0016452	sp|Q9VWE0|DOME_DROME Cytokine receptor OS=Drosophila melanogaster OX=7227 GN=dome PE=1 SV=1
OG0016453	sp|P47438|IF3_MYCGE Translation initiation factor IF-3 OS=Mycoplasma genitalium (strain ATCC 33530 / G-37 / NCTC 10195) OX=243273 GN=infC PE=3 SV=2
OG0016455
OG0016457	sp|Q6ECI6|ITB2_SHEEP Integrin beta-2 OS=Ovis aries OX=9940 GN=ITGB2 PE=2 SV=1
OG0016459	sp|Q9GNL3|FEND_DROME Transmembrane protein fend OS=Drosophila melanogaster OX=7227 GN=fend PE=2 SV=1
OG0016460	sp|Q9P243|ZFAT_HUMAN Zinc finger protein ZFAT OS=Homo sapiens OX=9606 GN=ZFAT PE=1 SV=2
OG0016464
OG0016473	sp|Q05876|FYN_CHICK Tyrosine-protein kinase Fyn OS=Gallus gallus OX=9031 GN=FYN PE=1 SV=2
OG0016476
OG0016482	sp|Q9UPU7|TBD2B_HUMAN TBC1 domain family member 2B OS=Homo sapiens OX=9606 GN=TBC1D2B PE=1 SV=2
OG0016486
OG0016488	sp|Q9ERC1|MYO16_RAT Unconventional myosin-XVI OS=Rattus norvegicus OX=10116 GN=Myo16 PE=1 SV=1
OG0016489	sp|Q96RW7|HMCN1_HUMAN Hemicentin-1 OS=Homo sapiens OX=9606 GN=HMCN1 PE=1 SV=2
OG0016491	sp|P30676|GNAI_PATPE Guanine nucleotide-binding protein G(i) subunit alpha OS=Patiria pectinifera OX=7594 PE=1 SV=3
OG0016494	sp|Q9UT27|PVG1_SCHPO Pyruvyl transferase 1 OS=Schizosaccharomyces pombe (strain 972 / ATCC 24843) OX=284812 GN=pvg1 PE=1 SV=1
OG0016498	sp|Q96P47|AGAP3_HUMAN Arf-GAP with GTPase, ANK repeat and PH domain-containing protein 3 OS=Homo sapiens OX=9606 GN=AGAP3 PE=1 SV=2
OG0016500	sp|Q9CQM6|ANR61_MOUSE Ankyrin repeat domain-containing protein 61 OS=Mus musculus OX=10090 GN=Ankrd61 PE=2 SV=1
OG0016501
OG0016508	sp|Q29458|LIPG_BOVIN Gastric triacylglycerol lipase OS=Bos taurus OX=9913 GN=LIPF PE=1 SV=1
OG0016511	sp|Q9J512|V223_FOWPN Putative ankyrin repeat protein FPV223 OS=Fowlpox virus (strain NVSL) OX=928301 GN=FPV223 PE=4 SV=1
OG0016512	sp|Q6R7F9|Y069_OSHVF Uncharacterized protein ORF69 OS=Ostreid herpesvirus 1 (isolate France) OX=654903 GN=ORF69 PE=4 SV=1
OG0016513	sp|Q6R7C1|Y109_OSHVF Uncharacterized protein ORF109 OS=Ostreid herpesvirus 1 (isolate France) OX=654903 GN=ORF109 PE=4 SV=1
OG0016514
OG0016522
OG0016526	sp|Q96PX9|PKH4B_HUMAN Pleckstrin homology domain-containing family G member 4B OS=Homo sapiens OX=9606 GN=PLEKHG4B PE=1 SV=4
OG0016528
OG0016529	sp|P05031|DDC_DROME Aromatic-L-amino-acid decarboxylase OS=Drosophila melanogaster OX=7227 GN=Ddc PE=1 SV=4
OG0016531
OG0016533	sp|Q9NWH9|SLTM_HUMAN SAFB-like transcription modulator OS=Homo sapiens OX=9606 GN=SLTM PE=1 SV=2
OG0016534	sp|Q9C0G6|DYH6_HUMAN Dynein heavy chain 6, axonemal OS=Homo sapiens OX=9606 GN=DNAH6 PE=2 SV=3
OG0016535
OG0016536
OG0016538
OG0016539
OG0016540	sp|P18930|NU3M_DROME NADH-ubiquinone oxidoreductase chain 3 OS=Drosophila melanogaster OX=7227 GN=mt:ND3 PE=3 SV=1
OG0016541	sp|P46061|RAGP1_MOUSE Ran GTPase-activating protein 1 OS=Mus musculus OX=10090 GN=Rangap1 PE=1 SV=2
OG0016543	sp|Q9LDD8|MCCB_ARATH Methylcrotonoyl-CoA carboxylase beta chain, mitochondrial OS=Arabidopsis thaliana OX=3702 GN=MCCB PE=2 SV=1
OG0016544	sp|Q7S906|DDI1_NEUCR DNA damage-inducible protein 1 OS=Neurospora crassa (strain ATCC 24698 / 74-OR23-1A / CBS 708.71 / DSM 1257 / FGSC 987) OX=367110 GN=ddi-1 PE=3 SV=2
OG0016547
OG0016548
OG0016550
OG0016552	sp|Q9Z429|NAHY_PSEPU Methyl-accepting chemotaxis protein NahY OS=Pseudomonas putida OX=303 GN=nahY PE=4 SV=1
OG0016553	sp|P29030|CHIT_BRUMA Endochitinase OS=Brugia malayi OX=6279 PE=1 SV=1
OG0016554	sp|P21328|RTJK_DROME RNA-directed DNA polymerase from mobile element jockey OS=Drosophila melanogaster OX=7227 GN=pol PE=1 SV=1
OG0016555	sp|Q9RGZ5|MRPA_BACPE Na(+)/H(+) antiporter subunit A OS=Bacillus pseudofirmus (strain OF4) OX=398511 GN=mrpA PE=1 SV=2
OG0016556	sp|Q98943|CASP2_CHICK Caspase-2 OS=Gallus gallus OX=9031 GN=CASP2 PE=2 SV=2
OG0016558	sp|Q9C0G6|DYH6_HUMAN Dynein heavy chain 6, axonemal OS=Homo sapiens OX=9606 GN=DNAH6 PE=2 SV=3
OG0016560	sp|O14960|LECT2_HUMAN Leukocyte cell-derived chemotaxin-2 OS=Homo sapiens OX=9606 GN=LECT2 PE=1 SV=2
OG0016563	sp|Q8N1N0|CLC4F_HUMAN C-type lectin domain family 4 member F OS=Homo sapiens OX=9606 GN=CLEC4F PE=2 SV=2
OG0016572	sp|Q9UIA9|XPO7_HUMAN Exportin-7 OS=Homo sapiens OX=9606 GN=XPO7 PE=1 SV=3
OG0016579	sp|P04464|CALM_WHEAT Calmodulin OS=Triticum aestivum OX=4565 PE=1 SV=3
OG0016581
OG0016582
OG0016583	sp|P02597|CALMS_CHICK Calmodulin, striated muscle OS=Gallus gallus OX=9031 GN=CCM1 PE=3 SV=2
OG0016585
OG0016588	sp|Q5SY80|CTSRE_HUMAN Cation channel sperm-associated protein subunit epsilon OS=Homo sapiens OX=9606 GN=CATSPERE PE=2 SV=1
OG0016605
OG0016610
OG0016613	sp|P10978|POLX_TOBAC Retrovirus-related Pol polyprotein from transposon TNT 1-94 OS=Nicotiana tabacum OX=4097 PE=2 SV=1
OG0016619
OG0016624	sp|Q9Z139|ROR1_MOUSE Inactive tyrosine-protein kinase transmembrane receptor ROR1 OS=Mus musculus OX=10090 GN=Ror1 PE=2 SV=2
OG0016626	sp|Q94C95|ATG1A_ARATH Serine/threonine-protein kinase ATG1a OS=Arabidopsis thaliana OX=3702 GN=ATG1A PE=1 SV=1
OG0016644	sp|Q9PTS8|ACHA9_CHICK Neuronal acetylcholine receptor subunit alpha-9 OS=Gallus gallus OX=9031 GN=CHRNA9 PE=1 SV=1
OG0016646	sp|P04323|POL3_DROME Retrovirus-related Pol polyprotein from transposon 17.6 OS=Drosophila melanogaster OX=7227 GN=pol PE=4 SV=1
OG0016653	sp|P18208|GLBM_TYLHE Giant extracellular hemoglobin linker 2 chain OS=Tylorrhynchus heterochaetus OX=6361 PE=1 SV=1
OG0016656	sp|P25123|GBRB_DROME Gamma-aminobutyric acid receptor subunit beta OS=Drosophila melanogaster OX=7227 GN=Rdl PE=2 SV=4
OG0016657	sp|Q9SCX5|AKT5_ARATH Probable potassium channel AKT5 OS=Arabidopsis thaliana OX=3702 GN=AKT5 PE=2 SV=2
OG0016675
OG0016682
OG0016684	sp|Q6GPM1|ZFR_XENLA Zinc finger RNA-binding protein OS=Xenopus laevis OX=8355 GN=zfr PE=2 SV=1
OG0016686
OG0016689
OG0016695	sp|Q6IWL4|TRAF6_DANRE TNF receptor-associated factor 6 OS=Danio rerio OX=7955 GN=traf6 PE=1 SV=2
OG0016729
OG0016730	sp|Q96JS3|PGBD1_HUMAN PiggyBac transposable element-derived protein 1 OS=Homo sapiens OX=9606 GN=PGBD1 PE=1 SV=1
OG0016733
OG0016759
OG0016766
OG0016771
OG0016785	sp|Q96JS3|PGBD1_HUMAN PiggyBac transposable element-derived protein 1 OS=Homo sapiens OX=9606 GN=PGBD1 PE=1 SV=1
OG0016792
OG0016793
OG0016800
OG0016803
OG0016805	sp|Q9NYU2|UGGG1_HUMAN UDP-glucose:glycoprotein glucosyltransferase 1 OS=Homo sapiens OX=9606 GN=UGGT1 PE=1 SV=3
OG0016811
OG0016813	sp|Q18823|LAM2_CAEEL Laminin-like protein lam-2 OS=Caenorhabditis elegans OX=6239 GN=lam-2 PE=1 SV=3
OG0016818	sp|Q8IYR6|TEFF1_HUMAN Tomoregulin-1 OS=Homo sapiens OX=9606 GN=TMEFF1 PE=1 SV=1
OG0016824
OG0016826	sp|Q8QGC4|PBX1_XENLA Pre-B-cell leukemia transcription factor 1 OS=Xenopus laevis OX=8355 GN=pbx1 PE=1 SV=1
OG0016829	sp|O43497|CAC1G_HUMAN Voltage-dependent T-type calcium channel subunit alpha-1G OS=Homo sapiens OX=9606 GN=CACNA1G PE=1 SV=3
OG0016830
OG0016836
OG0016841	sp|Q96H96|COQ2_HUMAN 4-hydroxybenzoate polyprenyltransferase, mitochondrial OS=Homo sapiens OX=9606 GN=COQ2 PE=1 SV=1
OG0016843
OG0016847	sp|P35992|PTP10_DROME Tyrosine-protein phosphatase 10D OS=Drosophila melanogaster OX=7227 GN=Ptp10D PE=1 SV=4
OG0016901	sp|Q3MHP5|DRG1_BOVIN Developmentally-regulated GTP-binding protein 1 OS=Bos taurus OX=9913 GN=DRG1 PE=2 SV=1
OG0016933
OG0016964	sp|Q8WXS8|ATS14_HUMAN A disintegrin and metalloproteinase with thrombospondin motifs 14 OS=Homo sapiens OX=9606 GN=ADAMTS14 PE=2 SV=2
OG0016984	sp|P04323|POL3_DROME Retrovirus-related Pol polyprotein from transposon 17.6 OS=Drosophila melanogaster OX=7227 GN=pol PE=4 SV=1
OG0016997	sp|Q6YW64|DRB4_ORYSJ Double-stranded RNA-binding protein 4 OS=Oryza sativa subsp. japonica OX=39947 GN=DRB4 PE=2 SV=1
OG0017012
OG0017014
OG0017021
OG0017023
OG0017034
OG0017039
OG0017040
OG0017042
OG0017076
OG0017098
OG0017118	sp|Q8BGQ7|SYAC_MOUSE Alanine--tRNA ligase, cytoplasmic OS=Mus musculus OX=10090 GN=Aars1 PE=1 SV=1
OG0017121
OG0017123	sp|Q8NE71|ABCF1_HUMAN ATP-binding cassette sub-family F member 1 OS=Homo sapiens OX=9606 GN=ABCF1 PE=1 SV=2
OG0017129	sp|Q9BZC7|ABCA2_HUMAN ATP-binding cassette sub-family A member 2 OS=Homo sapiens OX=9606 GN=ABCA2 PE=1 SV=4
OG0017131
OG0017134
OG0017143
OG0017151
OG0017154	sp|Q96MK3|FA20A_HUMAN Pseudokinase FAM20A OS=Homo sapiens OX=9606 GN=FAM20A PE=1 SV=4
OG0017169	sp|Q9P2Z0|THA10_HUMAN THAP domain-containing protein 10 OS=Homo sapiens OX=9606 GN=THAP10 PE=1 SV=1
OG0017170	sp|O96033|MOC2A_HUMAN Molybdopterin synthase sulfur carrier subunit OS=Homo sapiens OX=9606 GN=MOCS2 PE=1 SV=1
OG0017176
OG0017181
OG0017183	sp|F1ND48|FBH1_CHICK F-box DNA helicase 1 OS=Gallus gallus OX=9031 GN=FBH1 PE=2 SV=2
OG0017184	sp|Q868Z9|PPN_DROME Papilin OS=Drosophila melanogaster OX=7227 GN=Ppn PE=1 SV=2
OG0017187	sp|P28622|GUN4_BACS5 Endoglucanase 4 OS=Bacillus sp. (strain KSM-522) OX=120046 PE=3 SV=2
OG0017188
OG0017799	sp|Q924H0|NPFF2_MOUSE Neuropeptide FF receptor 2 OS=Mus musculus OX=10090 GN=Npffr2 PE=2 SV=2
OG0017811	sp|Q91755|GRIK2_XENLA Glutamate receptor ionotropic, kainate 2 OS=Xenopus laevis OX=8355 GN=grik2 PE=2 SV=2
OG0017825	sp|Q6DWJ6|GP139_HUMAN Probable G-protein coupled receptor 139 OS=Homo sapiens OX=9606 GN=GPR139 PE=2 SV=1
OG0017833
OG0017843	sp|Q8WUU4|ZN296_HUMAN Zinc finger protein 296 OS=Homo sapiens OX=9606 GN=ZNF296 PE=1 SV=1
OG0017849	sp|A2AVA0|SVEP1_MOUSE Sushi, von Willebrand factor type A, EGF and pentraxin domain-containing protein 1 OS=Mus musculus OX=10090 GN=Svep1 PE=1 SV=1
OG0017851	sp|Q2TB10|ZN800_HUMAN Zinc finger protein 800 OS=Homo sapiens OX=9606 GN=ZNF800 PE=1 SV=1
OG0017860
OG0017864	sp|Q9H2Y9|SO5A1_HUMAN Solute carrier organic anion transporter family member 5A1 OS=Homo sapiens OX=9606 GN=SLCO5A1 PE=2 SV=2
OG0017869
OG0017873
OG0017877	sp|Q9V9J3|SRC42_DROME Tyrosine-protein kinase Src42A OS=Drosophila melanogaster OX=7227 GN=Src42A PE=1 SV=1
OG0017885	sp|O95407|TNF6B_HUMAN Tumor necrosis factor receptor superfamily member 6B OS=Homo sapiens OX=9606 GN=TNFRSF6B PE=1 SV=1
OG0017893	sp|O43699|SIGL6_HUMAN Sialic acid-binding Ig-like lectin 6 OS=Homo sapiens OX=9606 GN=SIGLEC6 PE=1 SV=2
OG0017909
OG0017914	sp|Q9U518|ASPG_DIRIM L-asparaginase OS=Dirofilaria immitis OX=6287 PE=1 SV=1
OG0017928	sp|Q21313|EPI1_CAEEL Laminin-like protein epi-1 OS=Caenorhabditis elegans OX=6239 GN=epi-1 PE=1 SV=1
OG0017934	sp|P20262|GLRK_LITBE Probable glutamate receptor OS=Lithobates berlandieri OX=30360 PE=1 SV=1
OG0017950	sp|A7Y7X5|ZN711_DANRE Zinc finger protein 711 OS=Danio rerio OX=7955 GN=znf711 PE=1 SV=1
OG0017954
OG0017957	sp|P12821|ACE_HUMAN Angiotensin-converting enzyme OS=Homo sapiens OX=9606 GN=ACE PE=1 SV=1
OG0017967
OG0017972	sp|Q8VHX6|FLNC_MOUSE Filamin-C OS=Mus musculus OX=10090 GN=Flnc PE=1 SV=3
OG0017976	sp|Q9NQS5|GPR84_HUMAN G-protein coupled receptor 84 OS=Homo sapiens OX=9606 GN=GPR84 PE=2 SV=1
OG0017979	sp|Q7TQ62|PODN_MOUSE Podocan OS=Mus musculus OX=10090 GN=Podn PE=2 SV=1
OG0018002	sp|O01761|UNC89_CAEEL Muscle M-line assembly protein unc-89 OS=Caenorhabditis elegans OX=6239 GN=unc-89 PE=1 SV=3
OG0018018	sp|O75095|MEGF6_HUMAN Multiple epidermal growth factor-like domains protein 6 OS=Homo sapiens OX=9606 GN=MEGF6 PE=1 SV=4
OG0018020	sp|Q80Z71|TENN_MOUSE Tenascin-N OS=Mus musculus OX=10090 GN=Tnn PE=1 SV=2
OG0018033	sp|Q811F1|ZBT41_MOUSE Zinc finger and BTB domain-containing protein 41 OS=Mus musculus OX=10090 GN=Zbtb41 PE=2 SV=4
OG0018036
OG0018038	sp|Q8WXK1|ASB15_HUMAN Ankyrin repeat and SOCS box protein 15 OS=Homo sapiens OX=9606 GN=ASB15 PE=1 SV=3
OG0018039	sp|P07686|HEXB_HUMAN Beta-hexosaminidase subunit beta OS=Homo sapiens OX=9606 GN=HEXB PE=1 SV=3
OG0018043	sp|Q96CG8|CTHR1_HUMAN Collagen triple helix repeat-containing protein 1 OS=Homo sapiens OX=9606 GN=CTHRC1 PE=1 SV=1
OG0018046	sp|Q9NT99|LRC4B_HUMAN Leucine-rich repeat-containing protein 4B OS=Homo sapiens OX=9606 GN=LRRC4B PE=2 SV=3
OG0018055	sp|P14381|YTX2_XENLA Transposon TX1 uncharacterized 149 kDa protein OS=Xenopus laevis OX=8355 PE=4 SV=1
OG0018059
OG0018064	sp|P48416|CP10_LYMST Cytochrome P450 10 OS=Lymnaea stagnalis OX=6523 GN=CYP10 PE=2 SV=1
OG0018067	sp|Q11180|WHT1_CAEEL ABC transporter ATP-binding protein/permease wht-1 OS=Caenorhabditis elegans OX=6239 GN=wht-1 PE=2 SV=3
OG0018068	sp|Q9S9V9|FBL23_ARATH Putative F-box/LRR-repeat protein 23 OS=Arabidopsis thaliana OX=3702 GN=FBL23 PE=4 SV=1
OG0018073
OG0018076
OG0018079	sp|A5WWA0|ZNRF3_DANRE E3 ubiquitin-protein ligase znrf3 OS=Danio rerio OX=7955 GN=znrf3 PE=1 SV=2
OG0018080	sp|Q53RD9|FBLN7_HUMAN Fibulin-7 OS=Homo sapiens OX=9606 GN=FBLN7 PE=2 SV=1
OG0018089	sp|Q16880|CGT_HUMAN 2-hydroxyacylsphingosine 1-beta-galactosyltransferase OS=Homo sapiens OX=9606 GN=UGT8 PE=2 SV=2
OG0018097	sp|E1BGN7|CGAS_BOVIN Cyclic GMP-AMP synthase OS=Bos taurus OX=9913 GN=CGAS PE=3 SV=1
OG0018105	sp|Q2PC93|SSPO_CHICK SCO-spondin OS=Gallus gallus OX=9031 GN=SSPO PE=2 SV=1
OG0018107	sp|P53356|HTK16_HYDVU Tyrosine-protein kinase HTK16 OS=Hydra vulgaris OX=6087 GN=HTK16 PE=2 SV=1
OG0018110
OG0018111
OG0018112	sp|Q7KZ85|SPT6H_HUMAN Transcription elongation factor SPT6 OS=Homo sapiens OX=9606 GN=SUPT6H PE=1 SV=2
OG0018114	sp|P35448|TSP1_XENLA Thrombospondin-1 OS=Xenopus laevis OX=8355 GN=thbs1 PE=2 SV=1
OG0018115
OG0018118	sp|Q54B10|REDA_DICDI NADPH oxidoreductase A OS=Dictyostelium discoideum OX=44689 GN=redA PE=2 SV=1
OG0018119	sp|Q9U641|CMFB_DICDI Conditioned medium factor receptor 1 OS=Dictyostelium discoideum OX=44689 GN=cmfB PE=1 SV=1
OG0018121
OG0018122	sp|Q21920|ANKHM_CAEEL Ankyrin repeat and KH domain-containing protein mask-1 OS=Caenorhabditis elegans OX=6239 GN=mask-1 PE=3 SV=3
OG0018125	sp|Q58EK5|TDRD1_DANRE Tudor domain-containing protein 1 OS=Danio rerio OX=7955 GN=tdrd1 PE=1 SV=2
OG0018126	sp|O35920|CAN9_RAT Calpain-9 OS=Rattus norvegicus OX=10116 GN=Capn9 PE=2 SV=2
OG0018129	sp|Q5QNI1|KAT2_ORYSJ Potassium channel KAT2 OS=Oryza sativa subsp. japonica OX=39947 GN=Os01g0210700 PE=2 SV=2
OG0018132	sp|Q9JHU4|DYHC1_MOUSE Cytoplasmic dynein 1 heavy chain 1 OS=Mus musculus OX=10090 GN=Dync1h1 PE=1 SV=2
OG0018133	sp|O22704|CYP5F_ARATH Cytochrome B5-like protein OS=Arabidopsis thaliana OX=3702 GN=CB5LP PE=2 SV=1
OG0018134	sp|O09173|HGD_MOUSE Homogentisate 1,2-dioxygenase OS=Mus musculus OX=10090 GN=Hgd PE=1 SV=2
OG0018135	sp|Q9R194|CRY2_MOUSE Cryptochrome-2 OS=Mus musculus OX=10090 GN=Cry2 PE=1 SV=1
OG0018136	sp|Q5T1H1|EYS_HUMAN Protein eyes shut homolog OS=Homo sapiens OX=9606 GN=EYS PE=1 SV=5
OG0018137	sp|Q9D2L5|CPXM2_MOUSE Inactive carboxypeptidase-like protein X2 OS=Mus musculus OX=10090 GN=Cpxm2 PE=2 SV=1
OG0018175	sp|Q9NU02|ANKE1_HUMAN Ankyrin repeat and EF-hand domain-containing protein 1 OS=Homo sapiens OX=9606 GN=ANKEF1 PE=2 SV=2
OG0018197	sp|P0A9D3|GSTA_ECO57 Glutathione S-transferase GstA OS=Escherichia coli O157:H7 OX=83334 GN=gstA PE=3 SV=1
OG0018202
OG0018205
OG0018212	sp|Q68CJ6|SLIP_HUMAN Nuclear GTPase SLIP-GC OS=Homo sapiens OX=9606 GN=NUGGC PE=2 SV=3
OG0018215
OG0018225	sp|Q9Y289|SC5A6_HUMAN Sodium-dependent multivitamin transporter OS=Homo sapiens OX=9606 GN=SLC5A6 PE=2 SV=2
OG0018231	sp|O77408|OAR1_LYMST Octopamine receptor 1 OS=Lymnaea stagnalis OX=6523 PE=1 SV=1
OG0018234
OG0018242	sp|Q8NDG6|TDRD9_HUMAN ATP-dependent RNA helicase TDRD9 OS=Homo sapiens OX=9606 GN=TDRD9 PE=2 SV=3
OG0018249	sp|Q8N4C8|MINK1_HUMAN Misshapen-like kinase 1 OS=Homo sapiens OX=9606 GN=MINK1 PE=1 SV=2
OG0018250	sp|O35867|NEB1_RAT Neurabin-1 OS=Rattus norvegicus OX=10116 GN=Ppp1r9a PE=1 SV=1
OG0018257	sp|Q7JLI1|NAS31_CAEEL Zinc metalloproteinase nas-31 OS=Caenorhabditis elegans OX=6239 GN=nas-31 PE=2 SV=1
OG0018266	sp|A2A6A1|GPTC8_MOUSE G patch domain-containing protein 8 OS=Mus musculus OX=10090 GN=Gpatch8 PE=1 SV=1
OG0018269
OG0018284	sp|P48035|FABP4_BOVIN Fatty acid-binding protein, adipocyte OS=Bos taurus OX=9913 GN=FABP4 PE=2 SV=2
OG0018286	sp|C0HL13|LRP2_PIG Low-density lipoprotein receptor-related protein 2 OS=Sus scrofa OX=9823 GN=LRP2 PE=1 SV=1
OG0018294	sp|Q9ULL4|PLXB3_HUMAN Plexin-B3 OS=Homo sapiens OX=9606 GN=PLXNB3 PE=1 SV=2
OG0018302
OG0018306	sp|Q9H611|PIF1_HUMAN ATP-dependent DNA helicase PIF1 OS=Homo sapiens OX=9606 GN=PIF1 PE=1 SV=2
OG0018310	sp|Q8T5G8|CHS_MELAT Chitin synthase OS=Meloidogyne artiellia OX=42426 PE=1 SV=1
OG0018314
OG0018322	sp|Q86W92|LIPB1_HUMAN Liprin-beta-1 OS=Homo sapiens OX=9606 GN=PPFIBP1 PE=1 SV=2
OG0018327
OG0018339	sp|Q28IM6|HPCL1_XENTR Hippocalcin-like protein 1 OS=Xenopus tropicalis OX=8364 GN=hpcal1 PE=2 SV=1
OG0018341	sp|Q9ZQ31|STY13_ARATH Serine/threonine-protein kinase STY13 OS=Arabidopsis thaliana OX=3702 GN=STY13 PE=1 SV=2
OG0018355
OG0018365
OG0018368	sp|Q63085|PDE3B_RAT cGMP-inhibited 3',5'-cyclic phosphodiesterase B OS=Rattus norvegicus OX=10116 GN=Pde3b PE=2 SV=1
OG0018371	sp|Q13972|RGRF1_HUMAN Ras-specific guanine nucleotide-releasing factor 1 OS=Homo sapiens OX=9606 GN=RASGRF1 PE=1 SV=2
OG0018375	sp|Q9BYX4|IFIH1_HUMAN Interferon-induced helicase C domain-containing protein 1 OS=Homo sapiens OX=9606 GN=IFIH1 PE=1 SV=3
OG0018377	sp|Q6BEA0|PLXA4_DANRE Plexin-A4 OS=Danio rerio OX=7955 GN=plxna4 PE=2 SV=1
OG0018383
OG0018391	sp|P44121|DNLI_HAEIN DNA ligase OS=Haemophilus influenzae (strain ATCC 51907 / DSM 11121 / KW20 / Rd) OX=71421 GN=ligA PE=1 SV=2
OG0018393	sp|Q9V477|TOLL8_DROME Toll-like receptor Tollo OS=Drosophila melanogaster OX=7227 GN=Tollo PE=1 SV=1
OG0018395
OG0018397	sp|Q9U2H1|CDKL1_CAEEL Cyclin-dependent kinase-like 1 OS=Caenorhabditis elegans OX=6239 GN=cdkl-1 PE=1 SV=1
OG0018399
OG0018400	sp|Q765A7|PGAP1_RAT GPI inositol-deacylase OS=Rattus norvegicus OX=10116 GN=Pgap1 PE=1 SV=1
OG0018401	sp|Q99453|PHX2B_HUMAN Paired mesoderm homeobox protein 2B OS=Homo sapiens OX=9606 GN=PHOX2B PE=1 SV=2
OG0018407
OG0018411	sp|Q9NZU1|FLRT1_HUMAN Leucine-rich repeat transmembrane protein FLRT1 OS=Homo sapiens OX=9606 GN=FLRT1 PE=1 SV=3
OG0018413	sp|Q28309|AA3R_CANLF Adenosine receptor A3 OS=Canis lupus familiaris OX=9615 GN=ADORA3 PE=2 SV=1
OG0018418	sp|Q5ZIK2|PDZ11_CHICK PDZ domain-containing protein 11 OS=Gallus gallus OX=9031 GN=PDZD11 PE=2 SV=1
OG0018426	sp|Q9TU53|CUBN_CANLF Cubilin OS=Canis lupus familiaris OX=9615 GN=CUBN PE=1 SV=1
OG0018427
OG0018429	sp|Q9P0U1|TOM7_HUMAN Mitochondrial import receptor subunit TOM7 homolog OS=Homo sapiens OX=9606 GN=TOMM7 PE=1 SV=1
OG0018433	sp|Q8T112|CBPH_APLCA Cerebrin prohormone OS=Aplysia californica OX=6500 GN=CBPH PE=1 SV=1
OG0018437	sp|Q3USW5|FXRD2_MOUSE FAD-dependent oxidoreductase domain-containing protein 2 OS=Mus musculus OX=10090 GN=Foxred2 PE=2 SV=1
OG0018442
OG0018447
OG0018453
OG0018454
OG0018455	sp|Q80WQ9|ZBED4_MOUSE Zinc finger BED domain-containing protein 4 OS=Mus musculus OX=10090 GN=Zbed4 PE=2 SV=1
OG0018456
OG0018457	sp|Q9H2W2|MIXL1_HUMAN Homeobox protein MIXL1 OS=Homo sapiens OX=9606 GN=MIXL1 PE=1 SV=1
OG0018463
OG0018464	sp|O57460|TLL1_DANRE Dorsal-ventral patterning tolloid-like protein 1 OS=Danio rerio OX=7955 GN=tll1 PE=2 SV=1
OG0018471	sp|P03971|MIS_HUMAN Muellerian-inhibiting factor OS=Homo sapiens OX=9606 GN=AMH PE=1 SV=3
OG0018476	sp|Q6BD04|GPR54_ORENI G-protein coupled receptor 54 OS=Oreochromis niloticus OX=8128 GN=gpr54 PE=2 SV=1
OG0018481
OG0018485	sp|Q9HAP2|MLXIP_HUMAN MLX-interacting protein OS=Homo sapiens OX=9606 GN=MLXIP PE=1 SV=2
OG0018488
OG0018490	sp|P20825|POL2_DROME Retrovirus-related Pol polyprotein from transposon 297 OS=Drosophila melanogaster OX=7227 GN=pol PE=4 SV=1
OG0018495
OG0018499	sp|Q9UPY6|WASF3_HUMAN Wiskott-Aldrich syndrome protein family member 3 OS=Homo sapiens OX=9606 GN=WASF3 PE=1 SV=2
OG0018505
OG0018506
OG0018513	sp|P28699|RARG_XENLA Retinoic acid receptor gamma OS=Xenopus laevis OX=8355 GN=rarg PE=2 SV=2
OG0018515	sp|Q9VT65|CANB_DROME Calpain-B OS=Drosophila melanogaster OX=7227 GN=CalpB PE=1 SV=2
[truncated: 1,596 more rows]

## Sheet: Table7
Species/Node	# metazoan orthogroups	# lost metazoan orthogroups	# cumulative losses by species	% retained metazoan orthogroups
Nematostella vectensis	–	–	–	–
Bilateria	–	–	–	–
Hofstenia miamia	8836	3377	3377	61.78
Nephrozoa	8836	35	–	–
Deuterostomia	8836	692	–	–
Ambulacraria	8836	382	–	–
Saccoglossus kowalevskii	8836	345	1454	83.54
Strongylocentrotus purpuratus	8836	1508	2617	70.38
Chordata	8836	355	–	–
Branchiostoma lanceolatum	8836	419	1501	83.01
Vertebrata	8836	790
Lepisosteus oculatus	8836	238	2110	76.12
Homo sapiens	8836	298	2170	75.44
Protostomia	8836	268	–	–
Ecdysozoa	8836	2184	–	–
Strigamia maritima	8836	783	3270	62.99
Tribolium castaneum	8836	792	3279	62.89
Lophotrochozoa	8836	21	–	–
Mollusca	8836	820	–	–
Lottia gigantea	8836	625	1769	79.98
Bivalvia	8836	207	–	–
Crassostrea gigas	8836	1001	2352	73.38
Mizuhopecten yessoensis	8836	226	1577	82.15
Vermizoa + Lophophorata	8836	95	–	–
Vermizoa	8836	130	–	–
Parenchymia	8836	825	–	–
Schmidtea mediterranea	8836	2219	3593	59.34
Notospermus geniculatus	8836	190	1564	82.3
Annelida	8836	176	–	–
Owenia fusiformis	8836	903	1628	81.58
Pleistoannelida	8836	186	–	–
Dimorphilus gyrociliatus	8836	1990	2715	69.27
Sedentaria	8836	52	–	–
Lamellibrachia luymesi	8836	971	1696	80.81
Scolecida	8836	228	–	–
Capitella teleta	8836	842	1567	82.27
Clitellata	8836	747	–	–
Helobdella robusta	8836	2336	3061	65.36
Eisenia andreii	8836	1730	2455	72.22
Lophophorata	8836	754	–	–
Phoronopsis australis	8836	496	1669	81.11
Lingula anatina	8836	236	1409	84.05
Lingula anatina	8836	236	1409	84.05

## Sheet: Table8
Stage	Replicate	# of reads	# aligned reads	Mapping rate
blastula	replicate 1	54631086	32588081	0.5965
blastula	replicate 2	46947697	29937361	0.6377
gastrula	replicate 1	52833442	28252848	0.5348
gastrula	replicate 2	49640037	30526584	0.615
elongation	replicate 1	51921579	29790334	0.5738
elongation	replicate 2	51959906	29941269	0.5762
early larva	replicate 1	41396469	22388130	0.5408
early larva	replicate 2	49610840	30465162	0.6141
mitraria larva	replicate 1	41087129	25332492	0.6166
mitraria larva	replicate 2	59243774	37071783	0.6257
competent larva	replicate 1	357354964	235054826	0.658
competent larva	replicate 2	443768042	300454727	0.677
juvenile	replicate 1	458929925	223612209	0.487

## Sheet: Table9
Gene ID	blastula rep1	blastula rep2	gastrula rep1	gastrula rep2	elongation rep1	elongation rep2	early larva rep1	early larva rep2	mitraria larva rep1	mitraria larva rep2	competent larva rep1	competent larva rep2	juvenile rep1
OFUSG00001.1	0	0.00617719	0.529108	0.229713	3.02314	2.27379	19.1684	11.9925	14.816	11.2945	12.5635	2.77933	8.26167
OFUSG00001.2	0	0	0	0	2.44841e-08	6.97329e-10	13.5437	18.1933	17.4196	15.3828	24.4047	28.4003	1.19823
OFUSG00001.3	0.0446479	0	0.109044	0.705844	2.15467	2.95207	0	1.10236	2.22133	6.93144	10.7897	10.4187	2.49799
OFUSG00001.4	0	0	0	0.199579	0.0166517	1.28646	0.128937	1.21423e-09	0	0.530022	1.99116	2.17029	10.7907
OFUSG00001.5	0	0	0	0	2.41601	2.09357	2.10681	2.09845	2.17634	2.16244	5.0691	3.09915	0.00537372
OFUSG00002.1	0.479253	0.884039	1.06739	1.52484	1.62556	3.08313	1.60175	4.28443	0.918108	1.43552	4.06439	4.50975	3.43869
OFUSG00003.1	1.92283	1.8211	2.12704	1.60636	2.26792	2.24138	1.64032	1.51084	2.28559	1.90087	2.49285	2.3366	2.06254
OFUSG00003.2	1.96388	3.09721	2.10267	2.8753	2.06073	2.39815	1.60516	2.21655	2.36377	2.99535	2.64199	2.84839	1.53254
OFUSG00004.1	0.718552	0.904013	0.215001	0.877474	1.02016	0.31612	0.247141	0	0	0.383497	0.825458	0.226973	4.64469
OFUSG00005.1	3.15585	0.129233	0.493659	0.375417	0.116153	0.120147	0	0	0	0	0.133416	0	0
OFUSG00006.1	679.034	561.816	220.186	347.192	209.172	272.699	121.275	164.769	101.683	111.207	36.5387	39.1761	44.8818
OFUSG00007.1	44.678	50.3233	87.9113	78.9851	102.053	84.7001	94.5053	80.2959	139	115.645	107.26	104.467	114.552
OFUSG00008.1	25.2352	26.8737	3.21362	8.89963	5.48441	9.47949	3.45427	7.37322	3.80658	6.51161	6.67887	8.51827	7.58882
[truncated: 31,890 more rows]

## Sheet: Table10
Gene ID	blastula rep1	blastula rep2	gastrula rep1	gastrula rep2	elongation rep1	elongation rep2	early larva rep1	early larva rep2	mitraria larva rep1	mitraria larva rep2	competent larva rep1	competent larva rep2	juvenile rep1
[truncated: 31,903 more rows]

[truncated: 23 more sheets: Table11, Table12, Table13, Table14, Table15, Table16, Table17, Table18, Table19, Table20, Table21, Table22, Table23, Table24, Table25, Table26, Table27, Table28, Table29, Table30 …]
